# Supplementary material for: Sex Chromosome-Informed High-Throughput Screening of Anti-Hypertrophic Drugs Using hESC-Derived Cardiomyocytes
Source: Research Square preprint supplement (doi:10.21203/rs.3.rs-6911584/v1), 2025-06-24
Supplement: Supplementary file 1 [file 23ae7b5f9ac42d3c4b020fc9.xlsx]

## Sheet: General Information
Cherry Pick Library (96-well)-L2000-1-Z439983-100uL
	For more information on Selleck library service, please contact us via +1-832-582-8158 or info@selleckchem.com
	Product Details:
	Description		A unique collection of 965 compounds
	Container		96 Well Format Sample Storage Tube With Screw Cap and Optional 2D Barcode
	Stability		12 months | ﹣20°C | in DMSO
			24 months | ﹣80°C | in DMSO
	Shipping		Blue ice or Dry ice
	Packaged under inert gas		Yes
	Formulation		In 10 mM DMSO : Plate layout L2000; In 2 mM DMSO : Plate layout L2000;
			In 10 mM Water: Plate layout L2000; In 2 mM Water : Plate layout L2000;
	Plate layout: L2000-01
		1	2	3	4	5	6	7	8	9	10	11	12
	a	Empty	S1002	S1020	S1056	S1072	S1091	S1103	S1114	S1133	S1145	S1159	Empty
			ABT-737	PD184352 (CI-1040)	AC480 (BMS-599626)	ZSTK474	Linsitinib (OSI-906)	ZM 447439	JNJ-38877605	Alisertib (MLN8237)	SNS-032 (BMS-387032)	Ganetespib (STA-9090)
	b	Empty	S1003	S1032	S1057	S1076	S1092	S1105	S1115	S1134	S1147	S1163	Empty
			Linifanib (ABT-869)	Motesanib Diphosphate (AMG-706)	Obatoclax Mesylate (GX15-070)	SB203580	KU-55933 (ATM Kinase Inhibitor)	LY294002	Odanacatib (MK-0822)	AT9283	Barasertib (AZD1152-HQPA)	Onalespib (AT13387)
	c	Empty	S1004	S1036	S1061	S1078	S1094	S1106	S1117	S1138	S1151	S1165	Empty
	f		Veliparib (ABT-888)	PD0325901	Nutlin-3	MK-2206 2HCl	PF-04217903	OSU-03012 (AR-12)	Triciribine	Brivanib Alaninate (BMS-582664)	Ibutamoren mesylate (MK-0667, L163191)	ABT-751 (E7010)
	d	Empty	S1006	S1038	S1065	S1080	S1096	S1107	S1122	S1139	S1152	S1167	Empty
	h		Saracatinib (AZD0530)	PI-103	Pictilisib (GDC-0941)	SU11274	Quisinostat (JNJ-26481585) 2HCl	Danusertib (PHA-739358)	Mocetinostat (MGCD0103)	ADL5859 HCl	PLX-4720	CP-724714
	e	Empty	S1008	S1041	S1067	S1084	S1097	S1109	S1124	S1140	S1153	S1169	Empty
	b		Selumetinib (AZD6244)	STF-62247	SB431542	Brivanib (BMS-540215)	BTZ043 Racemate	BI 2536	BMS-754807	Andarine	Roscovitine (Seliciclib,CYC202)	TGX-221
	f	Empty	S1012	S1048	S1069	S1087	S1100	S1110	S1129	S1141	S1154	S1171	Empty
	d		BMS-536924	Tozasertib (VX-680, MK-0457)	Luminespib (AUY-922, NVP-AUY922)	Iniparib (BSI-201)	MLN8054	Varespladib (LY315920)	SRT1720 HCl	Tanespimycin (17-AAG)	SNS-314	CYC116
	g	Empty	S1017	S1049	S1070	S1089	S1101	S1111	S1130	S1142	S1157	S1172	Empty
	f		Cediranib (AZD2171)	Y-27632 2HCl	PHA-665752	Refametinib (RDEA119, Bay 86-9766)	Vatalanib (PTK787) 2HCl	Foretinib (GSK1363089)	YM155 (Sepantronium Bromide)	Alvespimycin (17-DMAG) HCl	Delanzomib (CEP-18770)	JNJ-26854165 (Serdemetan)
	h	Empty	S1018	S1052	S1071	S1090	S1102	S1113	S1132	S1143	S1158	S1174	Empty
	h		Dovitinib (TKI-258, CHIR-258)	Elesclomol (STA-4783)	HA14-1	Abexinostat (PCI-24781)	U0126-EtOH	GSK690693	INO-1001 (3-Aminobenzamide)	AG-490 (Tyrphostin B42)	MK-8245	Ostarine (GTx-024, MK-2866 )
	Plate layout: L2000-02
		1	2	3	4	5	6	7	8	9	10	11	12
	a	Empty	S1175	S1226	S1274	S1362	S1456	S1487	S1536	S1574	S2149	S2178	Empty
			BIIB021	KU-0063794	BX-795	Rigosertib (ON-01910)	Zibotentan (ZD4054)	PHA-793887	CP-673451	Doramapimod (BIRB 796)	GSK1292263	AG-14361
	b	Empty	S1176	S1230	S1275	S1364	S1460	S1515	S1537	S1594	S2153	S2179	Empty
			Plinabulin (NPI-2358)	Flavopiridol (Alvocidib)	BX-912	Patupilone (EPO906, Epothilone B)	SP600125	Pracinostat (SB939)	DMXAA (Vadimezan)	Semagacestat (LY450139)	CGS 21680 HCl	Gandotinib (LY2784544)
	c	Empty	S1180	S1244	S1290	S1366	S1462	S1524	S1541	S1802	S2155	S2182	Empty
	f		XAV-939	Amuvatinib (MP-470)	Celastrol	BMS-707035	AZD6482	AT7519	Selisistat (EX 527)	AICAR (Acadesine)	LY2608204	SB743921 HCl
	d	Empty	S1181	S1245	S1297	S1369	S1470	S1525	S1555	S2012	S2156	S2185	Empty
	h		ENMD-2076	Latrepirdine 2HCl	Epothilone A	Bafetinib (INNO-406)	Orantinib (TSU-68, SU6668)	Adavosertib （MK-1775）	AZD8055	PCI-34051	LY2886721	AST-1306
	e	Empty	S1194	S1249	S1315	S1392	S1475	S1526	S1556	S2013	S2158	S2186	Empty
	b		CUDC-101	JNJ-7706621	Ki16425	Pelitinib (EKB-569)	Pimasertib (AS-703026)	Quizartinib (AC220)	PHT-427	PF-573228	KW-2449	SB505124
	f	Empty	S1195	S1262	S1343	S1452	S1480	S1528	S1557	S2014	S2160	S2187	Empty
	d		TAK-700 (Orteronel)	Avagacestat (BMS-708163)	Ginkgolide B	Ispinesib (SB-715992)	Lomibuvir (VX-222, VCH-222)	LY2811376	KRN 633	BMS-265246	Almorexant HCl	Avasimibe
	g	Empty	S1201	S1263	S1352	S1454	S1481	S1532	S1558	S2018	S2161	S2192	Empty
	f		Dimesna	CHIR-99021 (CT99021)	TG100-115	PHA-680632	Zosuquidar (LY335979) 3HCl	AZD7762	AT7867	ENMD-2076 L-(+)-Tartaric acid	RAF265 (CHIR-265)	Sapitinib (AZD8931)
	h	Empty	S1220	S1264	S1361	S1455	S1486	S1533	S1561	S2134	S2170	S2193	Empty
	h		OSI-930	PD173074	Glesatinib?(MGCD265)	Cilomilast	AEE788 (NVP-AEE788)	R406 (free base)	BMS-777607	AZD8330	Givinostat (ITF2357)	GSK461364
	Plate layout: L2000-03
		1	2	3	4	5	6	7	8	9	10	11	12
	a	Empty	S2194	S2220	S2244	S2313	S2621	S2633	S2660	S2687	S2696	S2719	Empty
			R406	SB590885	AR-42	Indole-3-carbinol	AZD5438	NPS-2143	MK-0752	Mardepodect (PF-2545920)	Apitolisib (GDC-0980, RG7422)	AMG-900
	b	Empty	S2195	S2224	S2247	S2323	S2623	S2634	S2661	S2688	S2698	S2722	Empty
			Lexibulin (CYT997)	UK 383367	Buparlisib (BKM120, NVP-BKM120)	Methyl-Hesperidin	Omecamtiv mecarbil (CK-1827452)	Rebastinib (DCC-2036)	WYE-125132 (WYE-132)	R547	RS-127445	JTC-801
	c	Empty	S2198	S2228	S2248	S2363	S2624	S2635	S2662	S2690	S2699	S2726	Empty
	f		SGI-1776 free base	Belnacasan (VX-765)	Silmitasertib (CX-4945)	Tangeretin	OSI-027	CCT128930	ICG-001	ADX-47273	CH5132799	PH-797804
	d	Empty	S2201	S2230	S2250	S2404	S2626	S2637	S2663	S2691	S2700	S2728	Empty
	h		BMS-794833	Galunisertib (LY2157299)	(-)-Epigallocatechin Gallate	Isoliquiritigenin	Rabusertib (LY2603618)	Fasiglifam?(TAK-875)	WAY-100635 Maleate	BMY 7378 Dihydrochloride	KX2-391	AG-1478 (Tyrphostin AG-1478)
	e	Empty	S2214	S2231	S2276	S2448	S2629	S2639	S2672	S2692	S2703	S2730	Empty
	b		AZ 960	Telatinib	Bilobalide	Gambogic Acid	PNU-120596	SNX-2112 (PF-04928473)	PF-00562271 Besylate	TG101209	GSK1838705A	Crenolanib (CP-868596)
	f	Empty	S2215	S2235	S2286	S2449	S2630	S2656	S2679	S2693	S2713	S2738	Empty
	d		DAPT (GSI-IX)	Volasertib (BI 6727)	Cyclosporin A	Forskolin	GW3965 HCl	PF-04929113 (SNX-5422)	Flavopiridol HCl	Resminostat	Geldanamycin	PAC-1
	g	Empty	S2216	S2238	S2303	S2617	S2631	S2658	S2683	S2694	S2717	S2740	Empty
	f		Mubritinib (TAK 165)	Palomid 529 (P529)	gossypol-Acetic acid	TAK-733	URB597	Omipalisib (GSK2126458, GSK458)	CHIR-124	Turofexorate Isopropyl (XL335)	CP-91149	GSK1070916
	h	Empty	S2219	S2243	S2305	S2619	S2632	S2659	S2685	S2695	S2718	S2742	Empty
	h		Momelotinib (CYT387)	Degrasyn (WP1130)	Grape Seed Extract	MG-132	BMS-378806	5-hydroxymethyl Tolterodine (PNU 200577, 5-HMT, 5-HM)	KW-2478	Nepicastat (SYN-117) HCl	TAK-901	PHA-767491
	Plate layout: L2000-04
		1	2	3	4	5	6	7	8	9	10	11	12
	a	Empty	S2743	S2757	S2776	S2797	S2820	S2857	S2904	S2926	S3658	S3797	Empty
			PF-04691502	Evofosfamide (TH-302)	CPI-613	Lonafarnib	TAE226 (NVP-TAE226)	(-)-MK 801 maleate	PF-477736	TDZD-8	O6-Benzylguanine	Helicide
	b	Empty	S2747	S2759	S2778	S2801	S2822	S2859	S2905	S2928	S3676	S3804	Empty
			AMG-458	CUDC-907	GW842166X	AZD4547	OC000459	Golvatinib (E7050)	JNJ-7777120	TAK-715	Carbendazim	Alpha-Mangostin
	c	Empty	S2748	S2768	S2781	S2803	S2823	S2864	S2906	S3032	S3720	S3834	Empty
	f		Anacetrapib (MK-0859)	Dinaciclib (SCH727965)	RITA (NSC 652287)	Galeterone	Tideglusib	IMD 0354	Ki16198	Bindarit	Elafibranor	Astaxanthin
	d	Empty	S2749	S2769	S2783	S2808	S2828	S2867	S2910	S3600	S3759	S3839	Empty
	h		BGT226 (NVP-BGT226)	Dovitinib (TKI-258) Dilactic Acid	Vistusertib (AZD2014)	Ipatasertib (GDC-0068)	JNJ-1661010	WHI-P154	Tempol	Schisandrin B (Sch B)	Norcantharidin	1-Deoxynojirimycin
	e	Empty	S2751	S2770	S2784	S2811	S2842	S2872	S2914	S3603	S3765	S3846	Empty
	b		Milciclib (PHA-848125)	MK-5108 (VX-689)	TAK-285	Sapanisertib (INK 128, MLN0128)	SAR131675	GW5074	Dapivirine (TMC120)	Betulinic acid	Picroside II	Eupatilin
	f	Empty	S2753	S2772	S2785	S2812	S2845	S2876	S2918	S3608	S3777	S3853	Empty
	d		Tivantinib (ARQ 197)	Dalcetrapib (JTT-705, RO4607381)	A-803467	AT101	Semaxanib (SU5416)	(+)-MK 801 maleate	HC-030031	Demethylzeylasteral (T-96)	Gentiopicroside	Perillyl alcohol
	g	Empty	S2754	S2773	S2791	S2813	S2849	S2890	S2924	S3610	S3780	S3890	Empty
	f		AT406 (SM-406)	SB705498	Sotrastaurin	Ciproxifan Maleate	SB269970 HCl	PF-562271	CHIR-99021 (CT99021) HCl	Cordycepin	Secoisolariciresinol diglucoside	Leonurine
	h	Empty	S2755	S2774	S2796	S2818	S2856	S2894	S2925	S3653	S3787	S3897	Empty
	h		Varlitinib	MK-2461	WP1066	Tacedinaline (CI994)	SB 271046 hydrochloride	SB742457	Evacetrapib (LY2484595)	Spermidine trihydrochloride	Picroside I	(-)-Arctigenin
	Plate layout: L2000-05
		1	2	3	4	5	6	7	8	9	10	11	12
	a	Empty	S3905	S4521	S4908	S5285	S5387	S5620	S5807	S5930	S7015	S7046	Empty
			Iso-Steviol	DEET	SN-38	RU58841	D-Tagatose	NSI-189	HMN-176	PNU 282987	Birinapant	Brefeldin A
	b	Empty	S3931	S4708	S4926	S5307	S5394	S5711	S5811	S6002	S7016	S7049	Empty
			Ginsenoside Rd	Palmitoylethanolamide	(R)-Nepicastat HCl	PSI-6206 (RO-2433, GS-331007)	Tizoxanide	Deracoxib	Kevetrin hydrochloride	NXY-059 (Disufenton sodium)	VS-5584 (SB2343)	Oprozomib (ONX 0912)
	c	Empty	S3934	S4715	S5154	S5314	S5426	S5752	S5814	S6005	S7029	S7057	Empty
	f		Acetyl Resveratrol	Benzamide	Tetrahydropiperine	HTHQ(1-O-Hexyl-2,3,5-trimethylhydroquinone)	Bromopyruvic acid	Abametapir	cariporide	VX-702	AZD2461	LY2874455
	d	Empty	S3937	S4719	S5222	S5316	S5451	S5753	S5840	S6243	S7030	S7063	Empty
	h		Pterostilbene	Kynurenic acid	Coluracetam	NU2058	Ferulic acid methyl ester	Setipiprant(ACT-129968, KYTH-105)	Palifosfamide	Ethyl pyruvate	RG-7112	LY2090314
	e	Empty	S3941	S4728	S5242	S5319	S5458	S5771	S5903	S6249	S7036	S7067	Empty
	b		Pinocembrin	3,3'-Diindolylmethane	Cediranib Maleate	AWD 131-138	Verbascoside	sulforaphane	JANEX-1	Picolinic acid (PCL 016)	XL019	Tepotinib (EMD 1214063)
	f	Empty	S4116	S4743	S5268	S5321	S5514	S5793	S5904	S7009	S7039	S7076	Empty
	d		Isovaleramide	Wogonin	Solithromycin	Y15	Lanthanum(III) chloride heptahydrate	Motesanib (AMG-706)	WHI-P97	LCL161	PD168393	T0901317
	g	Empty	S4212	S4777	S5274	S5373	S5615	S5803	S5905	S7010	S7040	S7090	Empty
	f		Tenatoprazole	Plumbagin	GS967	Pseudolaric Acid B	GW501516	Alrestatin	Suberohydroxamic acid	GDC-0152	AZD3514	GSK923295
	h	Empty	S4261	S4872	S5275	S5386	S5616	S5804	S5917	S7014	S7041	S7094	Empty
	h		EUK 134	Titanium tetrafluoride	RAD140	7-Dehydrocholesterol	4-Methylcatechol	N-Acetylcysteine amide	Solcitinib	Merestinib (LY2801653)	CX-6258 HCl	PF-3758309
	Plate layout: L2000-06
		1	2	3	4	5	6	7	8	9	10	11	12
	a	Empty	S7097	S7119	S7145	S7174	S7242	S7273	S7323	S7360	S7456	S7517	Empty
			HSP990 (NVP-HSP990)	Go6976	AZD1080	Opaganib (ABC294640)	Erastin	SC75741	CHF 5074	OTX015	Osilodrostat (LCI699)	AZD7545
	b	Empty	S7098	S7121	S7155	S7189	S7252	S7282	S7326	S7369	S7458	S7520	Empty
			PD123319	MLN2480	Batimastat (BB-94)	I-BET-762	Selinexor (KPT-330)	NMS-E973	Tasisulam	4EGI-1	VER-49009	Darapladib (SB-480848)
	c	Empty	S7103	S7122	S7157	S7192	S7253	S7284	S7329	S7379	S7465	S7521	Empty
	f		Taselisib (GDC 0032)	XL888	Ilomastat (GM6001, Galardin)	PF-04620110	AZD2858	Rociletinib (CO-1686, AVL-301)	IOWH032	E-64	FTI 277 HCl	Afuresertib (GSK2110183)
	d	Empty	S7104	S7125	S7161	S7194	S7255	S7291	S7336	S7381	S7466	S7523	Empty
	h		AZD1208	KPT-185	Motolimod (VTX-2337)	GZD824 Dimesylate	NMS-P937 (NMS1286937)	TAK-632	CW069	Pepstatin A	GGTI 298 TFA salt	Entospletinib (GS-9973)
	e	Empty	S7111	S7132	S7169	S7205	S7261	S7292	S7339	S7393	S7482	S7530	Empty
	b		NLG919	P5091 (P005091)	Crenigacestat (LY3039478)	Idasanutlin (RG-7388)	Beta-Lapachone	RG2833 (RGFP109)	AZD3965	Aloxistatin	EHT 1864 2HCl	Vactosertib ?(TEW-7197)
	f	Empty	S7113	S7138	S7170	S7211	S7262	S7295	S7355	S7396	S7488	S7540	Empty
	d		Zebularine	BMS-833923	RO5126766 (CH5126766)	PF-04418948	Vidofludimus	Apabetalone (RVX-208)	ARQ 621	Calpeptin	MPI-0479605	SB273005
	g	Empty	S7114	S7143	S7171	S7215	S7263	S7304	S7357	S7435	S7492	S7541	Empty
	f		NU6027	LGK-974	GKT137831	Losmapimod (GW856553X)	AZD1981	CPI-203	PF-562271 HCl	AR-A014418	Uprosertib (GSK2141795)	Decernotinib (VX-509)
	h	Empty	S7115	S7144	S7173	S7218	S7269	S7309	S7358	S7445	S7515	S7546	Empty
	h		AMG-517	BMS-911543	Spebrutinib (CC-292, AVL-292)	Alvelestat (AZD9668)	PD173955	BAY 87-2243	Poziotinib (HM781-36B)	E3330	VGX-1027	Pritelivir (BAY 57-1293)
	Plate layout: L2000-07
		1	2	3	4	5	6	7	8	9	10	11	12
	a	Empty	S7549	S7589	S7634	S7651	S7674	S7723	S7748	S7777	S7816	S7854	Empty
			THZ1 2HCl	N6022	Cerdulatinib (PRT062070, PRT2070)	SB225002	Savolitinib(AZD6094, HMPL-504)	PRIMA-1	EPZ015666(GSK3235025)	Coelenterazine	MI-463	Ulixertinib (BVD-523, VRT752271)
	b	Empty	S7553	S7605	S7636	S7652	S7684	S7724	S7750	S7792	S7820	S7855	Empty
			GDC-0623	Filgotinib (GLPG0634)	SU9516	OTS514 hydrochloride	Salirasib	APR-246 (PRIMA-1MET)	KNK437	SRT2104 (GSK2245840)	EPZ020411 2HCl	Brilanestrant (GDC-0810, ARN-810)
	c	Empty	S7555	S7608	S7637	S7653	S7686	S7725	S7757	S7795	S7824	S7864	Empty
	f		4SC-202	UM171	DTP3	PND-1186 (VS-4718)	ML141	BLZ945	6-Thio-dG	ORY-1001 (RG-6016) 2HCl	Nazartinib (EGF816, NVS-816)	Oltipraz
	d	Empty	S7557	S7612	S7639	S7655	S7691	S7730	S7762	S7796	S7827	S7875	Empty
	h		CL-387785 (EKI-785)	PX-478 2HCl	3PO	CB-839	PS-1145	NU1025	TRx0237 (LMTX) mesylate	GSK2879552 2HCl	4-Hydroxytamoxifen	NVP-CGM097
	e	Empty	S7563	S7616	S7645	S7656	S7693	S7731	S7765	S7799	S7828	S7883	Empty
	b		AT13148	CPI-169	Pilaralisib (XL147)	CPI-360	AZD6738	AZD3839	Dovitinib (TKI258) Lactate	Pexmetinib (ARRY-614)	Licochalcone A	BQ-123
	f	Empty	S7564	S7617	S7646	S7665	S7694	S7734	S7766	S7808	S7829	S7886	Empty
	d		SAR125844	Tasquinimod	Voxtalisib (XL765, SAR245409)	CH5183284 (Debio-1347)	AZD8186	LFM-A13	Cabotegravir (GSK744, GSK1265744)	AT7519 HCl	CB1954	CC-223
	g	Empty	S7582	S7618	S7648	S7667	S7704	S7738	S7772	S7812	S7839	S7891	Empty
	f		Anacardic Acid	MI-2 (Menin-MLL Inhibitor)	OTS964	SU5402	LY2584702 Tosylate	PRT-060318 2HCl	Elacridar (GF120918)	Itacitinib (INCB39110)	Endoxifen HCl	CC-115
	h	Empty	S7585	S7624	S7649	S7672	S7707	S7741	S7775	S7813	S7843	S7892	Empty
	h		SB-334867	SD-208	MI-773 (SAR405838)	Omaveloxolone (RTA-408)	Verdinexor (KPT-335)	SB239063	Emricasan	AMG319	BI-847325	Avadomide(CC-122)
	Plate layout: L2000-08
		1	2	3	4	5	6	7	8	9	10	11	12
	a	Empty	S7896	S7947	S7971	S8003	S8024	S8057	S8118	S8167	S8215	S8270	Empty
			Sodium Tauroursodeoxycholate (TUDC)	PX-12	AZD3759	PQ 401	Tyrphostin AG 1296	Pacritinib (SB1518)	RHPS 4 methosulfate	AMG 337	BAY 1217389	SRT2183
	b	Empty	S7910	S7952	S7974	S8005	S8025	S8058	S8124	S8171	S8219	S8275	Empty
			Epacadostat (INCB024360)	Ozanimod (RPC1063)	L755507	SMI-4a	GSK3787	P276-00	BMS-582949	Daprodustat (GSK1278863)	Bitopertin	eFT-508 (eFT508)
	c	Empty	S7917	S7953	S7977	S8009	S8028	S8061	S8125	S8172	S8228	S8278	Empty
	f		Kenpaullone	ETC-1002	Napabucasin	AG-18	Tariquidar	Sabutoclax	Pamapimod (R-1503, Ro4402257)	Ro 61-8048	NT157	SHP099 dihydrochloride
	d	Empty	S7922	S7955	S7979	S8010	S8032	S8078	S8126	S8173	S8236	S8286	Empty
	h		Tiplaxtinin (PAI-039)	EPI-001	FG-2216	PRX-08066 Maleic acid	PRT062607 (P505-15, BIIB057) HCl	Bardoxolone Methyl	MK571	Verubecestat (MK-8931) Trifluoroacetat	MK-886 (L-663,536)	MKC-3946
	e	Empty	S7931	S7963	S7993	S8015	S8039	S8103	S8128	S8188	S8241	S8288	Empty
	b		STF-31	TIC10	SKF38393 HCl	CEP-32496	PU-H71	Sotagliflozin (LX4211)	BAY 41-2272	BFH772	Ponesimod	VLX1570
	f	Empty	S7936	S7965	S7999	S8018	S8040	S8104	S8161	S8193	S8244	S8292	Empty
	d		KD025 (SLx-2119)	PLX8394	SKF96365	Nirogacestat (PF-03084014, PF-3084014)	GDC-0349	SCH58261	ON123300	Lanabecestat（AZD3293, LY3314814）	Etomoxir (Na salt)	Selonsertib (GS-4997)
	g	Empty	S7937	S7966	S8001	S8019	S8054	S8105	S8163	S8194	S8253	S8301	Empty
	f		Nemiralisib (GSK2269557)	AZD8835	Ricolinostat (ACY-1215)	AZD5363	ASP3026	ZM241385	GDC-0084	umbralisib (TGR-1202)	CCT245737	AS101
	h	Empty	S7938	S7968	S8002	S8020	S8056	S8117	S8166	S8200	S8262	S8302	Empty
	h		GSK2292767	P7C3	GSK2636771	GW0742	Lomeguatrib	GMX1778 (CHS828)	ONO-4059 (GS-4059) hydrochloride	MK-4101	PRI-724	SR-12813
	Plate layout: L2000-09
		1	2	3	4	5	6	7	8	9	10	11	12
	a	Empty	S8309	S8362	S8404	S8457	S8503	S8560	S8581	S8609	S8672	S1494	Empty
			ATI-2341	Irbinitinib (ARRY-380, ONT-380)	S49076	UK-371804 HCl	BLU-554 (BLU554)	Seletalisib (UCB-5857)	Serabelisib (INK-1117,MLN-1117,TAK-117)	Derazantinib(ARQ-087)	Tenalisib (RP6530)	Ralimetinib (LY2228820)
	b	Empty	S8321	S8363	S8405	S8459	S8511	S8562	S8583	S8611	S8673	S2877	Empty
			MLR-1023	NMS-P118	RRx-001	TAK-063	Belizatinib (TSR-011)	CA-4948	TPX-0005	Vorasidenib (AG-881)	ONC212	L-NAME HCl
	c	Empty	S8322	S8370	S8407	S8464	S8519	S8564	S8589	S8629	S8675	S2879	Empty
	f		LY3023414	BGP-15 2HCl	PF-06273340	Citarinostat (ACY-241)	A-317491	Verubecestat (MK-8931)	SF2523	BMS-986205	H3B-6527	AMD3465 hexahydrobromide
	d	Empty	S8330	S8372	S8412	S8481	S8523	S8570	S8592	S8640	S8680	S3793	Empty
	h		IPI-549	AZD9496	Naquotinib(ASP8273)	SRT3025 HCl	GSK2256098	RXDX-106 (CEP-40783)	Pamiparib (BGB-290)	Reparixin (Repertaxin)	AZD1390	Phytic acid
	e	Empty	S8335	S8387	S8419	S8483	S8526	S8572	S8598	S8648	S8685	S4130	Empty
	b		PF-06409577	MSC2530818	E7449	CBL0137 (CBL-0137)	GDC-0575 (ARRY-575, RG7741)	Amcasertib (BBI503)	S 38093	ACY-738	AS1517499	Mildronate
	f	Empty	S8339	S8390	S8433	S8484	S8534	S8573	S8603	S8657	S8689	S4702	Empty
	d		Miransertib (ARQ 092) HCl	LXR-623 (WAY-252623)	NS-398 (NS398)	GSK2982772	LY3214996	Sitravatinib (MGCD516)	NGP 555	PF-06840003	RGX-104	Sarcosine
	g	Empty	S8352	S8397	S8444	S8490	S8538	S8578	S8605	S8664	S8698	S4962	Empty
	f		PT2385	Eltanexor (KPT-8602)	KPT-9274	Tanzisertib(CC-930)	PF-06651600	PRN1371	C188-9	GSK3326595 (EPZ015938)	GLPG1837	Agmatine sulfate
	h	Empty	S8353	S8400	S8452	S8493	S8555	S8580	S8608	S8666	S8699	S4972	Empty
	h		CPI-1205	Mivebresib(ABBV-075)	BAY-876	PD-166866 (PD166866)	Asciminib (ABL001)	COTI-2	Adenosine Dialdehyde (ADOX)	BAY 1895344 (BAY-1895344)	SNS-314 Mesylate	Choline Glycerophosphate
	Plate layout: L2000-10
		1	2	3	4	5	6	7	8	9	10	11	12
	a	Empty	S8711	S8738	S8760	S8801	S9188	S1591	S2425	S4760	S5932	S5591	Empty
			ARQ 531	Bimiralisib (PQR309)	Iberdomide(CC220)	CC-90003	Magnoflorine chloride	Bestatin	Apocynin	(2-Hydroxypropyl)-β-cyclodextrin (HP-β-CD)	BIA 10-2474	Ectoine
	b	Empty	S8714	S8741	S8761	S8807	S9245	S2162	S2799	S4761	S6185	S5801	Empty
			INCB057643	Avitinib (AC0010)	Adavivint (SM04690)	PFK158	Phellodendrine chloride	AZD1480	Daporinad (FK866, APO866)	Thymoquinone	Arachidonic acid	Ala-Gln
	c	Empty	S8721	S8745	S8765	S9010	S9295	S2183	S3693	S4927	S6412	S6176	Empty
	f		DCC-2618	LXH254	PF-04965842	Bevirimat	Dauricine	BGJ398 (NVP-BGJ398|Infigratinib)	2,6-Dihydroxypurine	Cyclen	Altiratinib	scyllo-Inositol
	d	Empty	S8723	S8752	S8770	S9089	S9339	S2298	S3796	S5140	S6414	S7204	Empty
	h		ABBV-744	leniolisib(CDZ 173)	Lanifibranor(IVA-337)	Magnoflorine	S-(-)-Cotinine	Fisetin	Rebaudioside A	Cinene	Apilimod	Fosbretabulin (Combretastatin A4 Phosphate (CA4P)) Disodium
	e	Empty	S8727	S8754	S8771	S9101	S9348	S2312	S3813	S5269	S6415	S7537	Empty
	b		Atuveciclib (BAY-1143572)	Alofanib(RPT835)	IDF-11774	Ingenol	D-(+)-Trehalose Anhydrous	Icariin	Bakuchiol	J147	Azeliragon	LB-100
	f	Empty	S8729	S8755	S8772	S9133	S9449	S2394	S3826	S5796	S6418	S7547	Empty
	d		AZ32	AZ304	LY 3200882	Chicoric acid	Urocanic acid	Naringenin	Hydroxytyrosol	Vanoxerine dihydrochloride	PF 429242	XL413 (BMS-863233)
	g	Empty	S8731	S8757	S8777	S9151	S1292	S2399	S3860	S5818	Empty	S8199	Empty
	f		IACS-010759 (IACS-10759)	Ripretinib (DCC-2618)	Evobrutinib	Praeruptorin E	Chelerythrine Chloride	Dihydromyricetin	Allicin	acalisib (GS-9820)		LTX-315
	h	Empty	S8736	S8759	S8780	S9172	S1553	S2407	S3922	S5839	Empty	S8442	Empty
	h		Verinurad (RDEA3170)	S55746 (S 055746,BCL201)	AZD3229	Phellodendrine	ABT-492(Delafloxacin, RX-3341, WQ-3034)	Curcumol	(-)-epigallocatechin	L-Kynurenine		TAK-659
	Plate layout: L2000-11
		1	2	3	4	5	6	7	8	9	10	11	12
	a	Empty	S6419	S6508	S6555	S8769	S8823	S2933	S6595	S6633	Empty	S8454	Empty
			BT-11	Mitapivat	AZD2098	Tinostamustine(EDO-S101)	ABX-1431	AM580	THZ531	AM 095		ATN-161 (Ac-PHSCN-NH2)
	b	Empty	S6420	S6519	S6610	S8788	S8840	S2934	S6616	S6638	Empty	S8501	Empty
			AGI 1067	R112	GSK2981278	CH7057288	SEL120 (SEL120-34，SEL120-34A)	Ensartinib (X-396) dihydrochloride	ETC-159	AMG-333		DAPTA
	c	Empty	S6421	S6520	S7102	S8791	S8842	S6490	S6617	S6644	Empty	S8549	Empty
	f		Diroximel Fumarete	WHI-P180	VE-822	Zanubrutinib (BGB-3111)	BAY-218	Vadadustat	MSX-122	Radiprodil (RGH-896)		AUNP-12
	d	Empty	S6422	S6523	S7889	S8795	S8854	S6531	S6619	S6645	Empty	S5226	Empty
	h		Lazabemide	RG14620	Xanthohumol	FDL169	JNJ-38877618(OMO-1)	Bohemine	ABT 702 dihydrochloride	AZD-5069		L-carnosine
	e	Empty	S6424	S6533	S8676	S8804	S8867	S6539	S6620	S6646	Empty	S6592	Empty
	b		TAS-301	Briciclib	Glumetinib	PF-06700841	Bentamapimod	ASP5878	Danirixin (GSK1325756)	CPI-444		Diquafosol Tetrasodium
	f	Empty	S6471	S6537	S8701	S8817	S9055	S6546	S6625	S6648	Empty	Empty	Empty
	d		Lucanthone	CVT-313	MK-8353 (SCH900353)	HS-10296	Salvianolic acid A	PD153035	Temsavir (BMS-626529)	PF-06282999
	g	Empty	S6502	S6541	S8739	S8821	S9080	S6551	S6627	S6712	Empty	Empty	Empty
	f		SD 0006	MTX-211	PLX51107	GSK3179106	Anhydroicaritin	Adelmidrol	E-4031 dihydrochloride	S107
	h	Empty	S6505	S6543	S8753	S8822	S9366	S6558	S6628	S6713	Empty	Empty	Empty
	h		X-376	ZD-4190	INCB054329（INCB-054329,INCB-54329）	Ligandrol (LGD-4033, VK-5211)	5'-Adenylic acid	Irosustat (STX64, BN83495)	E7820	ITD-1
	Plate layout: L2000-12
		1	2	3	4	5	6	7	8	9	10	11	12
	a	Empty	S6715	S6735	S8506	S8861	S1058	S2465	S6649	S8500	Empty	Empty	Empty
			YHO-13177	JD-5037	SCH-527123	Mavacamten (MYK-461)	BI-1347	CPI-1189	E7046（ER-886406）	BAY1125976
	b	Empty	S6718	S6741	S8781	S8874	S2115	S2488	S6656	S8882	Empty	Empty	Empty
			MKT-077	SB-756050	Selpercatinib (LOXO-292, ARRY-192)	PLX5622	RG 13022	VTP-27999 TFA	VAS2870	ODM-203
	c	Empty	S6723	S6746	S8814	S8878	S2255	S2600	S6658	S8893	Empty	Empty	Empty
	f		LXS-196	APD668	TAS6417	NDI-091143	BMOV	Fexinidazole	ETC-206 (AUM 001)	Firsocostat (GS-0976)
	d	Empty	S6724	S6749	S8820	S8895	S2419	S2643	S6659	S8907	Empty	Empty	Empty
	h		SR1001	ASP-9521	PTC596	Ziritaxestat (GLPG1690)	Eprobemide	4-IPP	Rimegepant (BMS-927711)	Dapansutrile (OLT1177)
	e	Empty	S6726	S6754	S8843	S8899	S2421	S2644	S6662	S8944	Empty	Empty	Empty
	b		MK1064	S1RA	AZD7648	FF-10101	PF-04457845	Lerisetron	AST-487 (NVP-AST487)	G150
	f	Empty	S6727	S6756	S8847	S8901	S2430	S2645	S6663	S8949	Empty	Empty	Empty
	d		AX-024 HCl	Siramesine HCl	BAY 2402234	DS-6051b	Azodicarbonamide	SIB 1757	Resmetirom (MGL-3196)	Olutasidenib (FT-2102)
	g	Empty	S6730	S7716	S8848	S9520	S2434	S2935	S6665	S9144	Empty	Empty	Empty
	f		CC-401 Hydrochloride	TAS-116	TAS-120	Lasofoxifene Tartrate	IDRA-21	Nicotinamide Riboside Chloride (NIAGEN)	Sparsentan (PS-433540,RE-021,DARA)	Solasonine
	h	Empty	S6733	S8455	S8853	S1024	S2436	S6647	S6689	S9145	Empty	Empty	Empty
	h		Edonerpic maleate	Talabostat (Val-boroPro, PT-100)	Belvarafenib(GDC5573, HM95573, RG6185)	LTI-291	Pranidipine	Bardoxolone	Merimepodib	Solamargine
	Plate layout: L2000-13
		1	2	3	4	5	6	7	8	9	10	11	12
	a	Empty	S1019	S2628	S7654	S8548	S8568	Empty	Empty	Empty	Empty	Empty	Empty
			Canertinib (CI-1033)	Gedatolisib (PF-05212384, PKI-587)	Defactinib (VS-6063, PF-04554878)	FGF401	G1T38
	b	Empty	S1043	S2735	S7698	S8724	S8927	Empty	Empty	Empty	Empty	Empty	Empty
			Tandutinib (MLN518)	MK-8776 (SCH 900776)	LY2584702	Lazertinib (YH25448,GNS-1480)	GSK2983559 (compound 3)
	c	Empty	S1108	S2788	S7756	S7035	Empty	Empty	Empty	Empty	Empty	Empty	Empty
	f		TAE684 (NVP-TAE684)	Capmatinib (INCB28060)	Indoximod (NLG-8189）	XL388
	d	Empty	S1112	S6001	S7819	S1327	Empty	Empty	Empty	Empty	Empty	Empty	Empty
	h		SGX-523	pomaglumetad (LY404039)	BLU9931	Ellagic acid
	e	Empty	S1205	S7004	S7842	S2684	Empty	Empty	Empty	Empty	Empty	Empty	Empty
	b		PIK-75 HCl	EPZ005687	LY3009120	CX-5461
	f	Empty	S1360	S7128	S7846	S5116	Empty	Empty	Empty	Empty	Empty	Empty	Empty
	d		GSK1059615	Tazemetostat (EPZ-6438)	TP-0903	Bilibubin
	g	Empty	S1519	S7221	S8012	S6642	Empty	Empty	Empty	Empty	Empty	Empty	Empty
	f		CCT129202	GS-9620	Otenabant (CP-945598) HCl	Branaplam (LMI070)
	h	Empty	S2157	S7518	S8138	S6719	Empty	Empty	Empty	Empty	Empty	Empty	Empty
	h		Taladegib (LY2940680)	Voreloxin (SNS-595) hydrochloride	Molidustat (BAY 85-3934)	E6446 (dihydrochloride))

## Sheet: Chemical Data-965cpds
Catalog Number	Product Name	Plate Location	Rack Number	Target	Pathway	Information	M.w.	CAS Number	DMSO (mg/mL)Max Solubility	DMSO (mM)Max Solubility	water (mg/mL)Max Solubility	water (mM)Max Solubility	URL	Formula	Form	Synonyms	SMILES	ALogP	HBA_Count	HBD_Count	RotatableBond
S1002	ABT-737	a2	L2000-01	Bcl-2,Autophagy	Apoptosis	ABT-737 is a BH3 mimetic inhibitor of Bcl-xL, Bcl-2 and Bcl-w with EC50 of 78.7 nM, 30.3 nM and 197.8 nM in cell-free assays, respectively no inhibition observed against Mcl-1, Bcl-B or Bfl-1. Phase 2.	813.43	852808-04-9	100	122.936	<1		http://selleckchem.com/products/ABT-737.html	C42H45ClN6O5S2	free base	N/A	CN(C)CCC(CSC1=CC=CC=C1)NC2=CC=C(C=C2[N+]([O-])=O)[S](=O)(=O)NC(=O)C3=CC=C(C=C3)N4CCN(CC4)CC5=C(C=CC=C5)C6=CC=C(Cl)C=C6	8.198	3	2	16
S1003	Linifanib (ABT-869)	b2	L2000-01	CSF-1R,PDGFR,VEGFR	Protein Tyrosine Kinase	Linifanib (ABT-869) is a novel, potent ATP-competitive VEGFR/PDGFR inhibitor for KDR, CSF-1R, Flt-1/3 and PDGFRβ with IC50 of 4 nM, 3 nM, 3 nM/4 nM and 66 nM respectively, mostly effective in mutant kinase-dependent cancer cells (i.e. FLT3). Phase 3.	375.41	796967-16-3	75	199.782	<1		http://selleckchem.com/products/ABT-869.html	C21H18FN5O	free base	AL39324,RG3635	CC1=CC(=C(F)C=C1)NC(=O)NC2=CC=C(C=C2)C3=C4C(=N[NH]C4=CC=C3)N	4.169	2	4	3
S1004	Veliparib (ABT-888)	c2	L2000-01	PARP	DNA Damage	Veliparib (ABT-888) is a potent inhibitor of PARP1 and PARP2 with Ki of 5.2 nM and 2.9 nM in cell-free assays, respectively. It is inactive to SIRT2. Phase 3.	244.29	912444-00-9	17	69.5894	<1		http://selleckchem.com/products/ABT-888.html	C13H16N4O	free base	NSC 737664	CC1(CCCN1)C2=NC3=C(C=CC=C3[NH]2)C(N)=O	0.986	2	3	2
S1006	Saracatinib (AZD0530)	d2	L2000-01	Src	Angiogenesis	Saracatinib (AZD0530) is a potent Src inhibitor with IC50 of 2.7 nM in cell-free assays, and potent to c-Yes, Fyn, Lyn, Blk, Fgr and Lck less active for Abl and EGFR (L858R and L861Q). Phase 2/3.	542.03	379231-04-6	35	64.5721	<1		http://selleckchem.com/products/AZD0530.html	C27H32ClN5O5	free base	N/A	CN1CCN(CCOC2=CC(=C3C(=NC=NC3=C2)NC4=C(Cl)C=CC5=C4OCO5)OC6CCOCC6)CC1	3.814	7	1	8
S1008	Selumetinib (AZD6244)	e2	L2000-01	MEK	MAPK	Selumetinib (AZD6244) is a potent, highly selective MEK inhibitor with IC50 of 14 nM for MEK1 and Kd value of 530 nM for MEK2. It also inhibits ERK1/2 phosphorylation with IC50 of 10 nM, no inhibition to p38α, MKK6, EGFR, ErbB2, ERK2, B-Raf, etc. Phase 3.	457.68	606143-52-6	91	198.829	<1		http://selleckchem.com/products/AZD6244.html	C17H15BrClFN4O3	free base	ARRY-142886	C[N]1C=NC2=C(F)C(=C(C=C12)C(=O)NOCCO)NC3=CC=C(Br)C=C3Cl	3.234	3	3	6
S1012	BMS-536924	f2	L2000-01	IGF-1R	Protein Tyrosine Kinase	BMS-536924 is an ATP-competitive IGF-1R/IR inhibitor with IC50 of 100 nM/73 nM, modest activity for Mek, Fak, and Lck with very little activity for Akt1, MAPK1/2.	479.96	468740-43-4	96	200.017	<1		http://selleckchem.com/products/BMS-536924.html	C25H26ClN5O3	free base	HY-10262, CS-0117	CC1=C2N=C([NH]C2=CC(=C1)N3CCOCC3)C4=C(NCC(O)C5=CC=CC(=C5)Cl)C=CNC4=O	2.385	3	4	6
S1017	Cediranib (AZD2171)	g2	L2000-01	VEGFR	Protein Tyrosine Kinase	Cediranib (AZD2171) is a highly potent VEGFR(KDR) inhibitor with IC50 of <1 nM, also inhibits Flt1/4 with IC50 of 5 nM/≤3 nM, similar activity against c-Kit and PDGFRβ, 36-, 110-fold and >1000-fold selective more for VEGFR than PDGFR-α, CSF-1R and Flt3 in HUVEC cells. Phase 3.	450.51	288383-20-0	90	199.774	<1		http://selleckchem.com/products/Cediranib.html	C25H27FN4O3	free base	NSC-732208	COC1=C(OCCCN2CCCC2)C=C3N=CN=C(OC4=C(F)C5=C([NH]C(=C5)C)C=C4)C3=C1	4.761	5	1	8
S1018	Dovitinib (TKI-258, CHIR-258)	h2	L2000-01	c-Kit,FGFR,FLT3,PDGFR,VEGFR	Angiogenesis	Dovitinib (TKI258, CHIR258) is a multitargeted RTK inhibitor, mostly for class III (FLT3/c-Kit) with IC50 of 1 nM/2 nM, also potent to class IV (FGFR1/3) and class V (VEGFR1-4) RTKs with IC50 of 8-13 nM, less potent to InsR, EGFR, c-Met, EphA2, Tie2, IGF-1R and HER2 in cell-free assays. Phase 4.	392.43	405169-16-6	30	76.4468	<1		http://selleckchem.com/products/CHIR-258.html	C21H21FN6O	Citrate	N/A	CN1CCN(CC1)C2=CC3=C(C=C2)N=C([NH]3)C4=C(N)C5=C(NC4=O)C=CC=C5F	1.781	2	3	2
S1020	PD184352 (CI-1040)	a3	L2000-01	MEK	MAPK	PD184352 (CI-1040) is an ATP non-competitive MEK1/2 inhibitor with IC50 of 17 nM in cell-based assays, 100-fold more selective for MEK1/2 than MEK5. Phase 2.	478.67	212631-79-3	96	200.556	<1		http://selleckchem.com/products/CI-1040-(PD184352).html	C17H14ClF2IN2O2	free base	N/A	FC1=CC=C(C(=O)NOCC2CC2)C(=C1F)NC3=CC=C(I)C=C3Cl	4.907	2	2	6
S1032	Motesanib Diphosphate (AMG-706)	b3	L2000-01	VEGFR,PDGFR,c-Kit	Protein Tyrosine Kinase	Motesanib Diphosphate (AMG-706) is a potent ATP-competitive inhibitor of VEGFR1/2/3 with IC50 of 2 nM/3 nM/6 nM, respectively similar activity against Kit, ~10-fold more selective for VEGFR than PDGFR and Ret. Phase 3.	569.44	857876-30-3	100	175.611	19	33.3661	http://selleckchem.com/products/Motesanib-Diphosphate.html	C22H29N5O9P2	Diphosphate	N/A	CC1(C)CNC2=CC(=CC=C12)NC(=O)C3=C(NCC4=CC=NC=C4)N=CC=C3.O[P](O)(O)=O.O[P](O)(O)=O	1.783	3	3	5
S1036	PD0325901	c3	L2000-01	MEK	MAPK	PD0325901 is a selective and non ATP-competitive MEK inhibitor with IC50 of 0.33 nM in cell-free assays, roughly 500-fold more potent than CI-1040 on phosphorylation of ERK1 and ERK2. Phase 2.	482.19	391210-10-9	96	199.092	<1		http://selleckchem.com/products/PD-0325901.html	C16H14F3IN2O4	free base	N/A	OCC(O)CONC(=O)C1=C(NC2=CC=C(I)C=C2F)C(=C(F)C=C1)F	2.578	2	4	7
S1038	PI-103	d3	L2000-01	Autophagy,DNA-PK,mTOR,PI3K	PI3K/Akt/mTOR	PI-103 is a multi-targeted PI3K inhibitor for p110α/β/δ/γ with IC50 of 2 nM/3 nM/3 nM/15 nM in cell-free assays, less potent to mTOR/DNA-PK with IC50 of 30 nM/23 nM.	348.36	371935-74-9	24	68.8942	<1		http://selleckchem.com/products/PI-103.html	C19H16N4O3	free base	N/A	OC1=CC(=CC=C1)C2=NC3=C(OC4=C3C=CC=N4)C(=N2)N5CCOCC5	2.798	5	1	2
S1041	STF-62247	e3	L2000-01	Autophagy	Autophagy	STF-62247 is a molecule targeting VHL-deficient renal cell carcinoma that induces autophagy. STF-62247 shows selective toxicity and growth inhibition of renal cells lacking VHL 25-fold greater sensitivity observed for cells with VHL deficiency compared to wild-type (VHL+).	267.35	315702-99-9	53	198.242	<1		http://selleckchem.com/products/STF-62247.html	C15H13N3S	free base	N/A	CC1=CC(=CC=C1)NC2=NC(=CS2)C3=CC=NC=C3	3.659	2	1	3
S1048	Tozasertib (VX-680, MK-0457)	f3	L2000-01	Aurora Kinase	Cell Cycle	Tozasertib (VX-680, MK-0457) is a pan-Aurora inhibitor, mostly against Aurora A with Kiapp of 0.6 nM in a cell-free assay, less potent towards Aurora B/Aurora C and 100-fold more selective for Aurora A than 55 other kinases. Phase 2.	464.59	639089-54-6	93	200.176	<1		http://selleckchem.com/products/VX-680(MK-0457).html	C23H28N8OS	free base	N/A	CN1CCN(CC1)C2=NC(=NC(=C2)NC3=N[NH]C(=C3)C)SC4=CC=C(NC(=O)C5CC5)C=C4	4.445	4	3	7
S1049	Y-27632 2HCl	g3	L2000-01	Autophagy,ROCK	Cell Cycle	Y-27632 2HCl is a selective ROCK1 (p160ROCK) inhibitor with Ki of 140 nM in a cell-free assay, exhibits >200-fold selectivity over other kinases, including PKC, cAMP-dependent protein kinase, MLCK and PAK.	320.26	129830-38-2	64	199.838	14	43.7145	http://selleckchem.com/products/Y-27632.html	C14H23Cl2N3O	Dihydrochloride	N/A	Cl.Cl.CC(N)C1CCC(CC1)C(=O)NC2=CC=NC=C2	1.871	2	2	3
S1052	Elesclomol (STA-4783)	h3	L2000-01	HSP (e.g. HSP90)	Cytoskeletal Signaling	Elesclomol (STA-4783) is a novel potent oxidative stress inducer that elicits pro-apoptosis events among tumor cells. Phase 3.	400.5	488832-69-5	80	199.75	<1		http://selleckchem.com/products/Elesclomol.html	C19H20N4O2S2	free base	N/A	CN(NC(=O)CC(=O)NN(C)C(=S)C1=CC=CC=C1)C(=S)C2=CC=CC=C2	2.885	2	2	8
S1056	AC480 (BMS-599626)	a4	L2000-01	EGFR,HER2	Protein Tyrosine Kinase	AC480 (BMS-599626) is a selective and efficacious inhibitor of HER1 and HER2 with IC50 of 20 nM and 30 nM, ~8-fold less potent to HER4, >100-fold to VEGFR2, c-Kit, Lck, MET etc. Phase 1.	530.55	714971-09-2	113	212.987	<1		http://selleckchem.com/products/BMS-599626.html	C27H27FN8O3	free base	N/A	CC1=C2[N](C=C1NC(=O)OCC3COCCN3)N=CN=C2NC4=CC5=C(C=C4)[N](CC6=CC=CC(=C6)F)N=C5	3.726	6	3	8
S1057	Obatoclax Mesylate (GX15-070)	b4	L2000-01	Autophagy,Bcl-2	Apoptosis	Obatoclax Mesylate (GX15-070) is an antagonist of Bcl-2 with Ki of 0.22 μM in a cell-free assay, can assist in overcoming MCL-1 mediated resistance to apoptosis. Phase 3.	413.49	803712-79-0	83	200.73	<1		http://selleckchem.com/products/Obatoclax-Mesylate.html	C21H23N3O4S	Mesylate	N/A	COC\1=CC(=NC1=C\C2=C(C)C=C(C)[NH]2)C3=CC4=CC=CC=C4[NH]3.C[S](O)(=O)=O	3.757	2	2	3
S1061	Nutlin-3	c4	L2000-01	E3 Ligase ,Mdm2	Apoptosis	Nutlin-3 is a potent and selective Mdm2 (RING finger-dependent ubiquitin protein ligase for itself and p53) antagonist with IC50 of 90 nM in a cell-free assay stabilizes p73 in p53-deficient cells.	581.5	890090-75-2	100	171.969	<1		http://selleckchem.com/products/Nutlin-3.html	C30H30Cl2N4O4	free base	N/A	COC1=CC(=C(C=C1)C2=NC(C(N2C(=O)N3CCNC(=O)C3)C4=CC=C(Cl)C=C4)C5=CC=C(Cl)C=C5)OC(C)C	5.434	5	1	6
S1065	Pictilisib (GDC-0941)	d4	L2000-01	PI3K	PI3K/Akt/mTOR	Pictilisib (GDC-0941) is a potent inhibitor of PI3Kα/δ with IC50 of 3 nM in cell-free assays, with modest selectivity against p110β (11-fold) and p110γ (25-fold). Phase 2.	513.64	957054-30-7	44	85.6631	<1		http://selleckchem.com/products/GDC-0941.html	C23H27N7O3S2	free base	RG7321	C[S](=O)(=O)N1CCN(CC1)CC2=CC3=NC(=NC(=C3S2)N4CCOCC4)C5=CC=CC6=C5C=N[NH]6	2.153	6	1	5
S1067	SB431542	e4	L2000-01	TGF-beta/Smad	TGF-beta/Smad	SB431542 is a potent and selective inhibitor of ALK5 with IC50 of 94 nM in a cell-free assay, 100-fold more selective for ALK5 than p38 MAPK and other kinases.	384.39	301836-41-9	76	197.716	<1		http://selleckchem.com/products/SB-431542.html	C22H16N4O3	free base	N/A	NC(=O)C1=CC=C(C=C1)C2=NC(=C([NH]2)C3=NC=CC=C3)C4=CC5=C(OCO5)C=C4	3.447	5	2	4
S1069	Luminespib (AUY-922, NVP-AUY922)	f4	L2000-01	HSP (e.g. HSP90)	Cytoskeletal Signaling	Luminespib (AUY-922, NVP-AUY922) is a highly potent HSP90 inhibitor for HSP90α/β with IC50 of 13 nM /21 nM in cell-free assays, weaker potency against the HSP90 family members GRP94 and TRAP-1, exhibits the tightest binding of any small-molecule HSP90 ligand. Phase 2.	465.54	747412-49-3	93	199.768	<1		http://selleckchem.com/products/NVP-AUY922.html	C26H31N3O5	free base	VER-52296	CCNC(=O)C1=NOC(=C1C2=CC=C(CN3CCOCC3)C=C2)C4=CC(=C(O)C=C4O)C(C)C	4.069	4	3	7
S1070	PHA-665752	g4	L2000-01	c-Met	Protein Tyrosine Kinase	PHA-665752 is a potent, selective and ATP-competitive c-Met inhibitor with IC50 of 9 nM in cell-free assays, >50-fold selectivity for c-Met than RTKs or STKs.	641.61	477575-56-7	128	199.498	<1		http://selleckchem.com/products/PHA-665752.html	C32H34Cl2N4O4S	free base	N/A	CC1=C(C(=C([NH]1)/C=C/2C(=O)NC3=C2C=C(C=C3)[S](=O)(=O)CC4=C(Cl)C=CC=C4Cl)C)C(=O)N5CCCC5CN6CCCC6	5.689	4	2	7
S1071	HA14-1	h4	L2000-01	Bcl-2	Apoptosis	HA14-1 is a non-peptidic ligand of a Bcl-2 surface pocket with IC50 of ~9 μM.	409.23	65673-63-4	82	200.376	<1		http://selleckchem.com/products/HA14-1.html	C17H17BrN2O5	free base	N/A	CCOC(=O)C(C#N)C1C2=CC(=CC=C2OC(=C1C(=O)OCC)N)Br	2.511	5	1	7
S1072	ZSTK474	a5	L2000-01	PI3K	PI3K/Akt/mTOR	ZSTK474 inhibits class I PI3K isoforms with IC50 of 37 nM in a cell-free assay, mostly PI3Kδ. Phase1/2.	417.41	475110-96-4	21	50.3102	<1		http://selleckchem.com/products/ZSTK474.html	C19H21F2N7O2	free base	N/A	FC(F)C1=NC2=C(C=CC=C2)[N]1C3=NC(=NC(=N3)N4CCOCC4)N5CCOCC5	3.366	6	0	4
S1076	SB203580	b5	L2000-01	p38 MAPK	MAPK	SB203580 is a p38 MAPK inhibitor with IC50 of 0.3-0.5 μM in THP-1 cells, 10-fold less sensitive to SAPK3(106T) and SAPK4(106T) and blocks PKB phosphorylation with IC50 of 3-5 μM.	377.43	152121-47-6	43	113.928	<1		http://selleckchem.com/products/SB-203580.html	C21H16FN3OS	Free Base	RWJ 64809, PB 203580	C[S](=O)C1=CC=C(C=C1)C2=NC(=C([NH]2)C3=CC=NC=C3)C4=CC=C(F)C=C4	3.883	3	1	4
S1078	MK-2206 2HCl	c5	L2000-01	Akt	PI3K/Akt/mTOR	MK-2206 2HCl is a highly selective inhibitor of Akt1/2/3 with IC50 of 8 nM/12 nM/65 nM in cell-free assays, respectively no inhibitory activities against 250 other protein kinases observed. Phase 2.	480.39	1032350-13-2	14	29.143	<1		http://selleckchem.com/products/MK-2206.html	C25H23Cl2N5O	Dihydrochloride	N/A	Cl.Cl.NC1(CCC1)C2=CC=C(C=C2)C3=C(C=C4C(=N3)C=CN5C(=O)NN=C45)C6=CC=CC=C6	4.183	3	2	3
S1080	SU11274	d5	L2000-01	c-Met	Protein Tyrosine Kinase	SU11274 is a selective Met inhibitor with IC50 of 10 nM in cell-free assays, no effects on PGDFRβ, EGFR or Tie2.	568.09	658084-23-2	92	161.946	<1		http://selleckchem.com/products/SU11274.html	C28H30ClN5O4S	free base	PKI-SU11274	CN1CCN(CC1)C(=O)C2=C(C)[NH]C(=C2C)/C=C/3C(=O)NC4=C3C=C(C=C4)[S](=O)(=O)N(C)C5=CC(=CC=C5)Cl	3.477	4	2	5
S1084	Brivanib (BMS-540215)	e5	L2000-01	FGFR,VEGFR	Protein Tyrosine Kinase	Brivanib is an ATP-competitive inhibitor against VEGFR2 with IC50 of 25 nM, moderate potency against VEGFR-1 and FGFR-1, but >240-fold against PDGFR-β. Phase 3.	370.38	649735-46-6	74	199.795	<1		http://selleckchem.com/products/Brivanib.html	C19H19FN4O3	free base	N/A	CC(O)COC1=C[N]2N=CN=C(OC3=C(F)C4=C([NH]C(=C4)C)C=C3)C2=C1C	3.481	4	2	5
S1087	Iniparib (BSI-201)	f5	L2000-01	PARP	DNA Damage	Iniparib (BSI-201) is a PARP1 inhibitor with demonstrated effectiveness in triple-negative breast cancer (TNBC). Phase 3.	292.03	160003-66-7	58	198.61	<1		http://selleckchem.com/products/BSI-201.html	C7H5IN2O3	free base	NSC-746045, IND-71677	NC(=O)C1=CC(=C(I)C=C1)[N+]([O-])=O	1.304	1	1	2
S1089	Refametinib (RDEA119, Bay 86-9766)	g5	L2000-01	MEK	MAPK	Refametinib (RDEA119, Bay 86-9766) is a potent, ATP non-competitive and highly selective inhibitor of MEK1 and MEK2 with IC50 of 19 nM and 47 nM, respectively.	572.34	923032-37-5	100	174.721	<1		http://selleckchem.com/products/refametinib-rdea119-bay86-9766.html	C19H20F3IN2O5S	free base	BAY 869766	COC1=C(N[S](=O)(=O)C2(CC2)CC(O)CO)C(=C(F)C(=C1)F)NC3=CC=C(I)C=C3F	2.827	3	4	9
S1090	Abexinostat (PCI-24781)	h5	L2000-01	HDAC	Cytoskeletal Signaling	Abexinostat (PCI-24781) is a novel pan-HDAC inhibitor mostly targeting HDAC1 with Ki of 7 nM, modest potent to HDACs 2, 3, 6, and 10 and greater than 40-fold selectivity against HDAC8. Phase 1/2.	397.42	783355-60-2	80	201.298	<1		http://selleckchem.com/products/PCI-24781.html	C21H23N3O5	free base	CRA-024781	CN(C)CC1=C(OC2=CC=CC=C12)C(=O)NCCOC3=CC=C(C=C3)C(=O)NO	2.353	4	2	8
S1091	Linsitinib (OSI-906)	a6	L2000-01	IGF-1R	Protein Tyrosine Kinase	Linsitinib (OSI-906) is a selective inhibitor of IGF-1R with IC50 of 35 nM in cell-free assays modestly potent to InsR with IC50 of 75 nM, and no activity towards Abl, ALK, BTK, EGFR, FGFR1/2, PKA etc. Phase 3.	421.49	867160-71-2	84	199.293	<1		http://selleckchem.com/products/OSI-906.html	C26H23N5O	free base	N/A	CC1(O)CC(C1)C2=NC(=C3[N]2C=CN=C3N)C4=CC=C5C=CC(=NC5=C4)C6=CC=CC=C6	3.757	3	1	3
S1092	KU-55933 (ATM Kinase Inhibitor)	b6	L2000-01	ATM/ATR	DNA Damage	KU-55933 (ATM Kinase Inhibitor) is a potent and specific ATM inhibitor with IC50/Ki of 12.9 nM/2.2 nM in cell-free assays, and is highly selective for ATM as compared to DNA-PK, PI3K/PI4K, ATR and mTOR.	395.49	587871-26-9	33	83.4408	<1		http://selleckchem.com/products/KU-55933.html	C21H17NO3S2	free base	N/A	O=C1C=C(OC(=C1)C2=CC=CC3=C2SC4=CC=CC=C4S3)N5CCOCC5	4.393	3	0	2
S1094	PF-04217903	c6	L2000-01	c-Met	Protein Tyrosine Kinase	PF-04217903 is a selective ATP-competitive c-Met inhibitor with IC50 of 4.8 nM in A549 cell line, susceptible to oncogenic mutations (no activity to Y1230C mutant). Phase 1.	372.38	956905-27-4	5	13.4271	<1		http://selleckchem.com/products/PF-04217903.html	C19H16N8O	free base	N/A	OCC[N]1C=C(C=N1)C2=NC3=C(N=C2)N=N[N]3CC4=CC5=CC=CN=C5C=C4	1.561	6	1	5
S1096	Quisinostat (JNJ-26481585) 2HCl	d6	L2000-01	HDAC	Epigenetics	Quisinostat (JNJ-26481585) 2HCl is a novel second-generation HDAC inhibitor with highest potency for HDAC1 with IC50 of 0.11 nM in a cell-free assay, modest potent to HDACs 2, 4, 10, and 11 greater than 30-fold selectivity against HDACs 3, 5, 8, and 9 and lowest potency to HDACs 6 and 7. Phase 2.	467.39	875320-31-3	79	169.024	<1		http://selleckchem.com/products/JNJ-26481585.html	C21H28Cl2N6O2	Dihydrochloride	N/A	Cl.Cl.C[N]1C=C(CNCC2CCN(CC2)C3=NC=C(C=N3)C(=O)NO)C4=CC=CC=C14	2.749	3	2	6
S1097	BTZ043 Racemate	e6	L2000-01	Anti-infection	Microbiology	BTZ043 racemate is a decaprenylphosphoryl-β-D-ribose 2'-epimerase (DprE1) inhibitor acting as a new antimycobacterial agent that kill Mycobacterium tuberculosis.	431.39	957217-65-1	22	50.9979	<1		http://selleckchem.com/products/BTZ043.html	C17H16F3N3O5S	free base	N/A	CC1COC2(CCN(CC2)C3=NC(=O)C4=CC(=CC(=C4S3)[N+]([O-])=O)C(F)(F)F)O1	3.515	4	0	3
S1100	MLN8054	f6	L2000-01	Aurora Kinase	Cell Cycle	MLN8054 is a potent and selective inhibitor of Aurora A with IC50 of 4 nM in Sf9 insect cell. It is more than 40-fold selective for Aurora A than Aurora B. Phase 1.	476.86	869363-13-3	95	199.22	<1		http://selleckchem.com/products/MLN8054.html	C25H15ClF2N4O2	free base	N/A	OC(=O)C1=CC=C(NC2=NC3=C(CN=C(C4=CC(=CC=C34)Cl)C5=C(F)C=CC=C5F)C=N2)C=C1	6.192	4	1	4
S1101	Vatalanib (PTK787) 2HCl	g6	L2000-01	VEGFR	Protein Tyrosine Kinase	Vatalanib (PTK787) 2HCl is an inhibitor of VEGFR2/KDR with IC50 of 37 nM in a cell-free assay, less potent against VEGFR1/Flt-1, 18-fold against VEGFR3/Flt-4. Phase 3.	419.73	212141-51-0	85	202.511	10	23.8248	http://selleckchem.com/products/Vatalanib,Dihydrochloride-Salt.html	C20H17Cl3N4	Dihydrochloride	ZK 222584 (cpg-79787) 2HCl	Cl.Cl.ClC1=CC=C(NC2=NN=C(CC3=CC=NC=C3)C4=CC=CC=C24)C=C1	5.469	3	1	4
S1102	U0126-EtOH	h6	L2000-01	MEK	MAPK	U0126-EtOH is a highly selective inhibitor of MEK1/2 with IC50 of 0.07 μM/0.06 μM in cell-free assays, 100-fold higher affinity for ΔN3-S218E/S222D MEK than PD98059.	426.56	1173097-76-1	85	199.269	<1		http://selleckchem.com/products/U0126.html	C20H22N6OS2	Ethanolate	N/A	CCO.N\C(SC1=CC=CC=C1N)=C(C#N)\C(C#N)=C(N)/SC2=CC=CC=C2N	2.169	0	5	5
S1103	ZM 447439	a7	L2000-01	Aurora Kinase	Cell Cycle	ZM 447439 is a selective and ATP-competitive inhibitor for Aurora A and Aurora B with IC50 of 110 nM and 130 nM, respectively. It is more than 8-fold selective for Aurora A/B than MEK1, Src, Lck and has little effect against CDK1/2/4, Plk1, Chk1, etc.	513.59	331771-20-1	103	200.549	<1		http://selleckchem.com/products/ZM-447439.html	C29H31N5O4	free base	N/A	COC1=C(OCCCN2CCOCC2)C=C3N=CN=C(NC4=CC=C(NC(=O)C5=CC=CC=C5)C=C4)C3=C1	4.118	6	2	10
S1105	LY294002	b7	L2000-01	Autophagy,PI3K	PI3K/Akt/mTOR	LY294002 is the first synthetic molecule known to inhibit PI3Kα/δ/β with IC50 of 0.5 μM/0.57 μM/0.97 μM in cell-free assays, respectively more stable in solution than Wortmannin, and also blocks autophagosome formation.	307.34	154447-36-6	36	117.134	<1		http://selleckchem.com/products/LY294002.html	C19H17NO3	free base	SF 1101, NSC 697286	O=C1C=C(OC2=C(C=CC=C12)C3=CC=CC=C3)N4CCOCC4	3.342	3	0	2
S1106	OSU-03012 (AR-12)	c7	L2000-01	PDK	PI3K/Akt/mTOR	OSU-03012 (AR-12) is a potent inhibitor of recombinant PDK-1(phosphoinositide-dependent kinase 1) with IC50 of 5 μM in a cell-free assay and 2-fold increase in potency over OSU-02067.	460.45	742112-33-0	11	23.8897	<1		http://selleckchem.com/products/OSU-03012.html	C26H19F3N4O	free base	N/A	NCC(=O)NC1=CC=C(C=C1)[N]2N=C(C=C2C3=CC4=C(C=C3)C5=C(C=CC=C5)C=C4)C(F)(F)F	5.212	2	2	5
S1107	Danusertib (PHA-739358)	d7	L2000-01	Aurora Kinase,Bcr-Abl,c-RET,FGFR	Cell Cycle	Danusertib (PHA-739358) is an Aurora kinase inhibitor for Aurora A/B/C with IC50 of 13 nM/79 nM/61 nM in cell-free assays, modestly potent to Abl, TrkA, c-RET and FGFR1, and less potent to Lck, VEGFR2/3, c-Kit, CDK2, etc. Phase 2.	474.55	827318-97-8	95	200.19	<1		http://selleckchem.com/products/PHA-739358(Danusertib).html	C26H30N6O3	free base	N/A	COC(C(=O)N1CC2=C(C1)C(=N[NH]2)NC(=O)C3=CC=C(C=C3)N4CCN(C)CC4)C5=CC=CC=C5	2.337	4	2	6
S1109	BI 2536	e7	L2000-01	PLK	Cell Cycle	BI2536 is a potent Plk1 inhibitor with IC50 of 0.83 nM in a cell-free assay. It shows 4- and 11-fold greater selectivity against Plk2 and Plk3. Phase 2.	521.66	755038-02-9	21	40.2561	<1		http://selleckchem.com/products/BI-2536.html	C28H39N7O3	free base	N/A	CCC1N(C2CCCC2)C3=NC(=NC=C3N(C)C1=O)NC4=CC=C(C=C4OC)C(=O)NC5CCN(C)CC5	3.548	5	2	7
S1110	Varespladib (LY315920)	f7	L2000-01	Phospholipase (e.g. PLA)	Metabolism	Varespladib (LY315920) is a potent and selective human non-pancreatic secretory phospholipase A2 (hnsPLA) inhibitor with IC50 of 7 nM. Phase 3.	380.39	172732-68-2	76	199.795	<1		http://selleckchem.com/products/LY315920(Varespladib).html	C21H20N2O5	free base	N/A	CCC1=C(C(=O)C(N)=O)C2=C(C=CC=C2OCC(O)=O)[N]1CC3=CC=CC=C3	3.078	4	1	8
S1111	Foretinib (GSK1363089)	g7	L2000-01	c-Met,VEGFR	Protein Tyrosine Kinase	Foretinib (GSK1363089) is an ATP-competitive inhibitor of HGFR and VEGFR, mostly for Met and KDR with IC50 of 0.4 nM and 0.9 nM in cell-free assays. Less potent against Ron, Flt-1/3/4, Kit, PDGFRα/β and Tie-2, and little activity to FGFR1 and EGFR. Phase 2.	632.65	849217-64-7	100	158.065	<1		http://selleckchem.com/products/XL880(GSK1363089,EXEL-2880).html	C34H34F2N4O6	free base	EXEL-2880,XL-880	COC1=CC2=C(C=C1OCCCN3CCOCC3)N=CC=C2OC4=C(F)C=C(NC(=O)C5(CC5)C(=O)NC6=CC=C(F)C=C6)C=C4	4.437	7	2	12
S1113	GSK690693	h7	L2000-01	Akt	PI3K/Akt/mTOR	GSK690693 is a pan-Akt inhibitor targeting Akt1/2/3 with IC50 of 2 nM/13 nM/9 nM in cell-free assays, also sensitive to the AGC kinase family: PKA, PrkX and PKC isozymes. Phase 1.	425.48	937174-76-0	39	91.6612	<1		http://selleckchem.com/products/GSK690693.html	C21H27N7O3	free base	N/A	CC[N]1C(=NC2=C1C(=CN=C2C#CC(C)(C)O)OCC3CCCNC3)C4=NON=C4N	1.839	6	2	7
S1114	JNJ-38877605	a8	L2000-01	c-Met	Protein Tyrosine Kinase	JNJ-38877605 is an ATP-competitive inhibitor of c-Met with IC50 of 4 nM, 600-fold selective for c-Met than 200 other tyrosine and serine-threonine kinases. Phase 1.	377.35	943540-75-8	37	98.0522	<1		http://selleckchem.com/products/JNJ-38877605.html	C19H13F2N7	free base	N/A	C[N]1C=C(C=N1)C2=N[N]3C(=NN=C3C(F)(F)C4=CC5=C(C=C4)N=CC=C5)C=C2	3.052	5	0	3
S1115	Odanacatib (MK-0822)	b8	L2000-01	Cysteine Protease	Proteases	Odanacatib (MK 0822) is a potent, selective, and neutral inhibitor of cathepsin K (human/rabbit) with IC50 of 0.2 nM/1 nM, and demonstrated high selectivity versus off-target cathepsin B, L, S. Phase 3.	525.56	603139-19-1	100	190.273	<1		http://selleckchem.com/products/Odanacatib-(MK0822).html	C25H27F4N3O3S	free base	N/A	CC(C)(F)CC(NC(C1=CC=C(C=C1)C2=CC=C(C=C2)[S](C)(=O)=O)C(F)(F)F)C(=O)NC3(CC3)C#N	3.978	3	2	10
S1117	Triciribine	c8	L2000-01	Akt	PI3K/Akt/mTOR	Triciribine is a DNA synthesis inhibitor, also inhibits Akt in PC3 cell line and HIV-1 in CEM-SS, H9, H9IIIB, U1 cells with IC50 of 130 nM and 20 nM, respectively does not inhibit PI3K/PDK1 5000-fold less active in cells lacking adenosine kinase. Phase 1/2.	320.3	35943-35-2	64	199.813	<1		http://selleckchem.com/products/Triciribine.html	C13H16N6O4	free base	NSC 154020, VD-0002, vqd-002	CN1N=C(N)C2=C[N](C3OC(CO)C(O)C3O)C4=C2C1=NC=N4	-1.119	4	4	2
S1122	Mocetinostat (MGCD0103)	d8	L2000-01	HDAC	Epigenetics	Mocetinostat (MGCD0103) is a potent HDAC inhibitor with most potency for HDAC1 with IC50 of 0.15 μM in a cell-free assay, 2- to 10- fold selectivity against HDAC2, 3, and 11, and no activity to HDAC4, 5, 6, 7, and 8. Phase 2.	396.44	726169-73-9	13	32.7918	<1		http://selleckchem.com/products/MGCD0103(Mocetinostat).html	C23H20N6O	free base	MG0103	NC1=CC=CC=C1NC(=O)C2=CC=C(CNC3=NC=CC(=N3)C4=CC=CN=C4)C=C2	2.798	4	3	6
S1124	BMS-754807	e8	L2000-01	c-Met,IGF-1R,Trk receptor	Protein Tyrosine Kinase	BMS-754807 is a potent and reversible inhibitor of IGF-1R/InsR with IC50 of 1.8 nM/1.7 nM in cell-free assays, less potent to Met, Aurora A/B, TrkA/B and Ron, and shows little activity to Flt3, Lck, MK2, PKA, PKC etc. Phase 2.	461.49	1001350-96-4	92	199.354	<1		http://selleckchem.com/products/BMS-754807.html	C23H24FN9O	free base	N/A	CC1(CCCN1C2=N[N]3C=CC=C3C(=N2)NC4=N[NH]C(=C4)C5CC5)C(=O)NC6=CC=C(F)N=C6	4.069	5	3	6
S1129	SRT1720 HCl	f8	L2000-01	Sirtuin	Epigenetics	SRT1720 HCl is a selective SIRT1 activator with EC50 of 0.16 μM in a cell-free assay, but is >230-fold less potent for SIRT2 and SIRT3.	506.02	1001645-58-4	38	75.0958	<1		http://selleckchem.com/products/SRT1720.html	C25H24ClN7OS	Hydrochloride	N/A	Cl.O=C(NC1=CC=CC=C1C2=C[N]3C(=CSC3=N2)CN4CCNCC4)C5=NC6=CC=CC=C6N=C5	3.018	4	2	5
S1130	YM155 (Sepantronium Bromide)	g8	L2000-01	Survivin	Apoptosis	YM155 (Sepantronium Bromide) is a potent survivin suppressant by inhibiting Survivin promoter activity with IC50 of 0.54 nM in HeLa-SURP-luc and CHO-SV40-luc cells does not significantly inhibit SV40 promoter activity, but is observed to slightly inhibit the interaction of Survivin with XIAP. Phase 2.	443.29	781661-94-7	55	124.072	89	200.772	http://selleckchem.com/products/YM155.html	C20H19BrN4O3	Bromide	N/A	[Br-].COCC[N]1C(=[N+](CC2=CN=CC=N2)C3=C1C(=O)C4=C(C=CC=C4)C3=O)C	-0.733	5	0	5
S1132	INO-1001 (3-Aminobenzamide)	h8	L2000-01	PARP	DNA Damage	INO-1001 is a potent inhibitor of PARP with IC50 of <50 nM in CHO cells and a mediator of oxidant-induced myocyte dysfunction during reperfusion. Phase 2.	136.15	3544-24-9	27	198.311	<1		http://selleckchem.com/products/INO-1001.html	C7H8N2O	free base	3-ABA , 3-amino Benzamide, 3-AB	NC(=O)C1=CC(=CC=C1)N	0.085	1	2	1
S1133	Alisertib (MLN8237)	a9	L2000-01	Aurora Kinase	Cell Cycle	Alisertib (MLN8237) is a selective Aurora A inhibitor with IC50 of 1.2 nM in a cell-free assay. It has >200-fold higher selectivity for Aurora A than Aurora B. Phase 3.	518.92	1028486-01-2	27	52.0311	<1		http://selleckchem.com/products/MLN8237.html	C27H20ClFN4O4	free base	N/A	COC1=C(C(=CC=C1)F)C2=NCC3=C(N=C(NC4=CC(=C(C=C4)C(O)=O)OC)N=C3)C5=C2C=C(Cl)C=C5	5.954	6	1	6
S1134	AT9283	b9	L2000-01	Aurora Kinase,Bcr-Abl,JAK	JAK/STAT	AT9283 is a potent JAK2/3 inhibitor with IC50 of 1.2 nM/1.1 nM in cell-free assays also potent to Aurora A/B, Abl(T315I). Phase 2.	381.43	896466-04-9	76	199.25	<1		http://selleckchem.com/products/AT9283.html	C19H23N7O2	free base	N/A	O=C(NC1CC1)NC2=C[NH]N=C2C3=NC4=CC(=CC=C4[NH]3)CN5CCOCC5	1.51	4	4	5
S1138	Brivanib Alaninate (BMS-582664)	c9	L2000-01	FGFR,VEGFR	Protein Tyrosine Kinase	Brivanib alaninate (BMS-582664) is the prodrug of BMS-540215, an ATP-competitive inhibitor against VEGFR2 with IC50 of 25 nM.	441.46	649735-63-7	88	199.339	<1		http://selleckchem.com/products/Brivanib-alaninate.html	C22H24FN5O4	Alaninate	N/A	CC(N)C(=O)OC(C)COC1=C[N]2N=CN=C(OC3=C(F)C4=C([NH]C(=C4)C)C=C3)C2=C1C	3.383	6	2	8
S1139	ADL5859 HCl	d9	L2000-01	Opioid Receptor	Neuronal Signaling	ADL5859 HCl is a δ-opioid receptor agonist with Ki of 0.8 nM, selectivity against opioid receptor κ, μ, and weak inhibitory activity at the hERG channel. Phase 2.	428.95	850173-95-4	86	200.49	5	11.6564	http://selleckchem.com/products/ADL-5859.html	C24H29ClN2O3	Hydrochloride	N/A	Cl.CCN(CC)C(=O)C1=CC=C(C=C1)C2=CC3(CCNCC3)OC4=CC=CC(=C24)O	3.196	2	2	4
S1140	Andarine	e9	L2000-01	Androgen Receptor	Endocrinology & Hormones	Andarine is a selective non-steroidal androgen receptor (AR) agonist with Ki of 4 nM, tissue-selective for anabolic organs. Phase 3.	441.36	401900-40-1	88	199.384	<1		http://selleckchem.com/products/Andarine.html	C19H18F3N3O6	free base	GTx-007	CC(=O)NC1=CC=C(OCC(C)(O)C(=O)NC2=CC=C(C(=C2)C(F)(F)F)[N+]([O-])=O)C=C1	2.314	3	2	8
S1141	Tanespimycin (17-AAG)	f9	L2000-01	HSP (e.g. HSP90)	Cytoskeletal Signaling	Tanespimycin (17-AAG) is a potent HSP90 inhibitor with IC50 of 5 nM in a cell-free assay, having a 100-fold higher binding affinity for HSP90 derived from tumour cells than HSP90 from normal cells. Phase 2.	585.69	75747-14-7	100	170.739	<1		http://selleckchem.com/products/17-AAG(Geldanamycin).html	C31H43N3O8	free base	CP127374,NSC-330507, KOS 953	COC1CC(C)CC2=C(NCC=C)C(=O)C=C(NC(=O)C(=C\C=C/C(OC)C(OC(N)=O)/C(=C/C(C)C1O)C)\C)C2=O	2.524	7	4	7
S1142	Alvespimycin (17-DMAG) HCl	g9	L2000-01	HSP (e.g. HSP90)	Cytoskeletal Signaling	Alvespimycin (17-DMAG) HCl is a potent HSP90 inhibitor with IC50 of 62 nM in a cell-free assay. Phase 2.	653.21	467214-21-7	131	200.548	<1		http://selleckchem.com/products/17-DMAG,Hydrochloride-Salt.html	C32H49ClN4O8	Hydrochloride	NSC 707545,BMS 826476 HCl,KOS 1022	Cl.COC1CC(C)CC2=C(NCCN(C)C)C(=O)C=C(NC(=O)C(=C\C=C/C(OC)C(OC(N)=O)/C(=C/C(C)C1O)C)\C)C2=O	2.428	7	4	8
S1143	AG-490 (Tyrphostin B42)	h9	L2000-01	EGFR	Protein Tyrosine Kinase	AG-490 (Tyrphostin B42) is an inhibitor of EGFR with IC50 of 0.1 μM in cell-free assays, 135-fold more selective for EGFR versus ErbB2, also inhibits JAK2 with no activity to Lck, Lyn, Btk, Syk and Src.	294.3	133550-30-8	58	197.078	<1		http://selleckchem.com/products/AG-490.html	C17H14N2O3	free base	Zinc02557947	OC1=C(O)C=C(C=C1)\C=C(C#N)\C(=O)NCC2=CC=CC=C2	2.444	1	3	4
S1145	SNS-032 (BMS-387032)	a10	L2000-01	CDK	Cell Cycle	SNS-032 (BMS-387032) has firstly been described as a selective inhibitor of CDK2 with IC50 of 48 nM in cell-free assays and is 10- and 20-fold selective over CDK1/CDK4. It is also found to be sensitive to CDK7/9 with IC50 of 62 nM/4 nM, with little effect on CDK6. Phase 1.	380.53	345627-80-7	76	199.721	<1		http://selleckchem.com/products/SNS-032.html	C17H24N4O2S2	free base	N/A	CC(C)(C)C1=CN=C(CSC2=CN=C(NC(=O)C3CCNCC3)S2)O1	2.07	4	2	6
S1147	Barasertib (AZD1152-HQPA)	b10	L2000-01	Aurora Kinase	Cell Cycle	Barasertib (AZD1152-HQPA) is a highly selective Aurora B inhibitor with IC50 of 0.37 nM in a cell-free assay, ~3700 fold more selective for Aurora B over Aurora A. Phase 1.	507.56	722544-51-6	102	200.961	<1		http://selleckchem.com/products/AZD1152-HQPA.html	C26H30FN7O3	free base	INH 34	CCN(CCO)CCCOC1=CC=C2C(=NC=NC2=C1)NC3=CC(=N[NH]3)CC(=O)NC4=CC=CC(=C4)F	3.493	5	4	13
S1151	Ibutamoren mesylate (MK-0667, L163191)	c10	L2000-01	Others	Others	Ibutamoren mesylate (MK-0667, L163191) is a potent, orally active growth hormone (GH) secretagogue.	624.769	159634-47-6, 159752-10-0 (methanesulfonate), 159633-92-8 (HCl)	100	160.059	100	160.059	http://selleckchem.com/products/L-163191.html	C28H40N4O8S2	mesylate	N/A	CC(C)(N)C(=O)NC(COCC1=CC=CC=C1)C(=O)N2CCC3(CC2)CN(C4=CC=CC=C34)[S](C)(=O)=O.C[S](O)(=O)=O	0.439	5	2	8
S1152	PLX-4720	d10	L2000-01	Raf	MAPK	PLX4720 is a potent and selective inhibitor of B-RafV600E with IC50 of 13 nM in a cell-free assay, equally potent to c-Raf-1(Y340D and Y341D mutations), 10-fold selectivity for B-RafV600E than wild-type B-Raf.	413.83	918505-84-7	83	200.565	<1		http://selleckchem.com/products/PLX-4720.html	C17H14ClF2N3O3S	free base	N/A	CCC[S](=O)(=O)NC1=CC=C(F)C(=C1F)C(=O)C2=C[NH]C3=NC=C(Cl)C=C23	3.435	4	2	6
S1153	Roscovitine (Seliciclib,CYC202)	e10	L2000-01	CDK	Cell Cycle	Roscovitine (Seliciclib, CYC202) is a potent and selective CDK inhibitor for Cdc2, CDK2 and CDK5 with IC50 of 0.65 μM, 0.7 μM and 0.16 μM in cell-free assays. It shows little effect on CDK4/6. Phase 2.	354.45	186692-46-6	71	200.31	<1		http://selleckchem.com/products/Roscovitine.html	C19H26N6O	free base	N/A	CCC(CO)NC1=NC(=C2N=C[N](C(C)C)C2=N1)NCC3=CC=CC=C3	3.32	3	3	8
S1154	SNS-314	f10	L2000-01	Aurora Kinase	Cell Cycle	SNS-314 is a potent and selective inhibitor of Aurora A, Aurora B and Aurora C with IC50 of 9 nM, 31 nM, and 3 nM, respectively. It is less potent to Trk A/B, Flt4, Fms, Axl, c-Raf and DDR2. Phase 1.	430.93	1057249-41-8	105	243.659	6	13.9234	http://selleckchem.com/products/sns-314-mesylate.html	C19H19ClN6O4S3	Mesylate	N/A	C[S](O)(=O)=O.ClC1=CC=CC(=C1)NC(=O)NC2=NC=C(CCNC3=NC=NC4=C3SC=C4)S2	3.539	4	3	6
S1157	Delanzomib (CEP-18770)	g10	L2000-01	Proteasome	Proteases	Delanzomib (CEP-18770) is an orally active inhibitor of the chymotrypsin-like activity of proteasome with IC50 of 3.8 nM, with only marginal inhibition of the tryptic and peptidylglutamyl activities of the proteosome. Phase 1/2.	413.28	847499-27-8	83	200.832	<1		http://selleckchem.com/products/cep-18770.html	C21H28BN3O5	free base	N/A	CC(C)C(CNC(=O)C(NC(=O)C1=NC(=CC=C1)C2=CC=CC=C2)C(C)O)B(O)O	2.646	3	3	9
S1158	MK-8245	h10	L2000-01	Dehydrogenase	Metabolism	MK-8245 is an liver-targeting inhibitor of stearoyl-CoA desaturase (SCD) with IC50 of 1 nM for human SCD1 and 3 nM for both rat SCD1 and mouse SCD1, with anti-diabetic and anti-dyslipidemic efficacy. Phase 2.	467.25	1030612-90-8	93	199.037	<1		http://selleckchem.com/products/mk-8245.html	C17H16BrFN6O4	free base	N/A	OC(=O)C[N]1N=NC(=N1)C2=CC(=NO2)N3CCC(CC3)OC4=CC(=CC=C4Br)F	2.991	7	0	6
S1159	Ganetespib (STA-9090)	a11	L2000-01	HSP (e.g. HSP90)	Cytoskeletal Signaling	Ganetespib (STA-9090) is an HSP90 inhibitor with IC50 of 4 nM in OSA 8 cells, induces apoptosis of OSA cells while normal osteoblasts are not affected active metabolite of STA-1474. Phase 3.	364.4	888216-25-9	40	109.769	<1		http://selleckchem.com/products/ganetespib-sta-9090.html	C20H20N4O3	free base	N/A	CC(C)C1=C(O)C=C(O)C(=C1)C2=NNC(=O)N2C3=CC4=C(C=C3)[N](C)C=C4	3.866	2	3	3
S1163	Onalespib (AT13387)	b11	L2000-01	HSP (e.g. HSP90)	Cytoskeletal Signaling	Onalespib (AT13387) is a selective potent Hsp90 inhibitor with IC50 of 18 nM in A375 cells, displays a long duration of anti-tumor activity. Phase 2.	409.52	912999-49-6	25	61.0471	<1		http://selleckchem.com/products/at13387.html	C24H31N3O3	free base	N/A	CC(C)C1=C(O)C=C(O)C(=C1)C(=O)N2CC3=C(C2)C=C(CN4CCN(C)CC4)C=C3	3.322	1	2	4
S1165	ABT-751 (E7010)	c11	L2000-01	Microtubule Associated	Cytoskeletal Signaling	ABT-751 (E7010) binds to the colchicine site on β-tubulin and inhibits polymerization of microtubules, not a substrate for the MDR transporter and is active against cell lines resistant to vincristine, doxorubicin, and cisplatin. Phase 1/2.	371.41	141430-65-1	74	199.241	<1		http://selleckchem.com/products/ABT-751.html	C18H17N3O4S	free base	N/A	COC1=CC=C(C=C1)[S](=O)(=O)NC2=C(NC3=CC=C(O)C=C3)N=CC=C2	2.997	4	3	6
S1167	CP-724714	d11	L2000-01	EGFR,HER2	Protein Tyrosine Kinase	CP-724714 is a potent, selective inhibitor of HER2/ErbB2 with IC50 of 10 nM, >640-fold selectivity against EGFR, InsR, IRG-1R, PDGFR, VEGFR2, Abl, Src, c-Met etc in cell-free assays. Phase 2.	469.53	537705-08-1	94	200.2	<1		http://selleckchem.com/products/CP-724714.html	C27H27N5O3	free base	N/A	COCC(=O)NC/C=C/C1=CC=C2N=CN=C(NC3=CC=C(OC4=CC=C(C)N=C4)C(=C3)C)C2=C1	3.987	6	2	9
S1169	TGX-221	e11	L2000-01	PI3K	PI3K/Akt/mTOR	TGX-221 is a p110β-specific inhibitor with IC50 of 5 nM in a cell-free assay, 1000-fold more selective for p110β than p110α.	364.44	663619-89-4	12	32.9272	<1		http://selleckchem.com/products/TGX-221.html	C21H24N4O2	free base	N/A	CC(NC1=CC=CC=C1)C2=CC(=CN3C(=O)C=C(N=C23)N4CCOCC4)C	2.373	3	1	4
S1171	CYC116	f11	L2000-01	Aurora Kinase,VEGFR	Cell Cycle	CYC116 is a potent inhibitor of Aurora A/B with Ki of 8.0 nM/9.2 nM, is less potent to VEGFR2 (Ki of 44 nM), with 50-fold greater potency than CDKs, not active against PKA, Akt/PKB, PKC, no effect on GSK-3α/β, CK2, Plk1 and SAPK2A. Phase 1.	368.46	693228-63-6	24	65.136	<1		http://selleckchem.com/products/CYC116.html	C18H20N6OS	free base	N/A	CC1=C(SC(=N1)N)C2=NC(=NC=C2)NC3=CC=C(C=C3)N4CCOCC4	2.743	4	2	4
S1172	JNJ-26854165 (Serdemetan)	g11	L2000-01	E3 Ligase ,p53	Apoptosis	JNJ-26854165 (Serdemetan) acts as a HDM2 ubiquitin ligase antagonist and also induces early apoptosis in p53 wild-type cells, inhibits cellular proliferation followed by delayed apoptosis in the absence of functional p53. Phase 1.	328.41	881202-45-5	66	200.968	<1		http://selleckchem.com/products/JNJ-26854165.html	C21H20N4	free base	N/A	C(CC1=C[NH]C2=CC=CC=C12)NC3=CC=C(NC4=CC=NC=C4)C=C3	4.236	1	3	6
S1174	Ostarine (GTx-024, MK-2866 )	h11	L2000-01	Androgen Receptor	Endocrinology & Hormones	MK-2866 (GTx-024) is a selective androgen receptor modulator (SARM) with Ki of 3.8 nM, and is tissue-selective for anabolic organs. Phase 3.	389.33	841205-47-8	78	200.344	<1		http://selleckchem.com/products/Ostarine.html	C19H14F3N3O3	free base	Enobosarm, ostarine	CC(O)(COC1=CC=C(C=C1)C#N)C(=O)NC2=CC=C(C#N)C(=C2)C(F)(F)F	3.057	2	1	6
S1175	BIIB021	a2	L2000-02	HSP (e.g. HSP90)	Cytoskeletal Signaling	BIIB021 is an orally available, fully synthetic small-molecule inhibitor of HSP90 with Ki and EC50 of 1.7 nM and 38 nM, respectively. Phase 2.	318.76	848695-25-0	64	200.778	<1		http://selleckchem.com/products/BIIB021.html	C14H15ClN6O	free base	CNF2024	COC1=C(C)C=NC(=C1C)C[N]2C=NC3=C(Cl)N=C(N)N=C23	2.223	5	1	3
S1176	Plinabulin (NPI-2358)	b2	L2000-02	VDA	Angiogenesis	Plinabulin (NPI-2358) is a vascular disrupting agent (VDA) against tubulin-depolymerizing with IC50 of 9.8~18 nM in tumor cells. Phase 1/2.	336.39	714272-27-2	54	160.528	<1		http://selleckchem.com/products/NPI-2358.html	C19H20N4O2	free base	N/A	CC(C)(C)C1=C(/C=C/2NC(=O)C(/NC2=O)=C/C3=CC=CC=C3)N=C[NH]1	1.921	3	3	3
S1180	XAV-939	c2	L2000-02	Wnt/beta-catenin	Stem Cells & Wnt	XAV-939 selectively inhibits Wnt/β-catenin-mediated transcription through tankyrase1/2 inhibition with IC50 of 11 nM/4 nM in cell-free assays, regulates axin levels and does not affect CRE, NF-κB or TGF-β.	312.31	284028-89-3	12	38.4234	<1		http://selleckchem.com/products/XAV-939.html	C14H11F3N2OS	free base	NVP-XAV939	OC1=C2CSCCC2=NC(=N1)C3=CC=C(C=C3)C(F)(F)F	3.676	2	1	2
S1181	ENMD-2076	d2	L2000-02	Aurora Kinase,FLT3,VEGFR	Angiogenesis	ENMD-2076 has selective activity against Aurora A and Flt3 with IC50 of 14 nM and 1.86 nM, 25-fold selective for Aurora A than over Aurora B and less potent to VEGFR2/KDR and VEGFR3, FGFR1 and FGFR2 and PDGFRα. Phase 2.	375.47	934353-76-1	105	279.65	1	2.66333	http://selleckchem.com/products/enmd-2076.html	C21H25N7	Tartaric Acid	N/A	CN1CCN(CC1)C2=CC(=NC(=N2)\C=C\C3=CC=CC=C3)NC4=N[NH]C(=C4)C	4.015	3	2	5
S1194	CUDC-101	e2	L2000-02	EGFR,HDAC,HER2	Epigenetics	CUDC-101 is a potent multi-targeted inhibitor against HDAC, EGFR and HER2 with IC50 of 4.4 nM, 2.4 nM, and 15.7 nM, and inhibits class I/II HDACs, but not class III, Sir-type HDACs. Phase 1.	434.49	1012054-59-9	20	46.031	<1		http://selleckchem.com/products/CUDC-101.html	C24H26N4O4	free base	N/A	COC1=CC2=C(C=C1OCCCCCCC(=O)NO)C(=NC=N2)NC3=CC(=CC=C3)C#C	5.376	5	2	11
S1195	TAK-700 (Orteronel)	f2	L2000-02	P450 (e.g. CYP17)	Metabolism	TAK-700 (Orteronel) is a potent and highly selective human 17,20-lyase inhibitor with IC50 of 38 nM, exhibits >1000-fold selectivity over other CYPs (e.g. 11-hydroxylase and CYP3A4). Phase 3.	307.35	426219-18-3	61	198.471	<1		http://selleckchem.com/products/TAK-700.html	C18H17N3O2	free base	N/A	CNC(=O)C1=CC=C2C=C(C=CC2=C1)C3(O)CC[N]4C=NC=C34	1.075	2	1	2
S1201	Dimesna	g2	L2000-02	Others	Others	Dimesna is an uroprotective agent used to decrease urotoxicity.	326.34	16208-51-8	65	199.179	65	199.179	http://selleckchem.com/products/Dimesna.html	C4H8Na2O6S4	Disodium salt	BNP-7787	[Na+].[Na+].[O-][S](=O)(=O)CCSSCC[S]([O-])(=O)=O	-4.295	0	0	7
S1220	OSI-930	h2	L2000-02	c-Kit,CSF-1R,VEGFR	Protein Tyrosine Kinase	OSI-930 is a potent inhibitor of Kit, KDR and CSF-1R with IC50 of 80 nM, 9 nM and 15 nM, respectively also potent to Flt-1, c-Raf and Lck and low activity against PDGFRα/β, Flt-3 and Abl. Phase 1.	443.44	728033-96-3	89	200.704	<1		http://selleckchem.com/products/OSI-930.html	C22H16F3N3O2S	free base	N/A	FC(F)(F)OC1=CC=C(NC(=O)C2=C(NCC3=CC=NC4=CC=CC=C34)C=CS2)C=C1	6.266	3	2	7
S1226	KU-0063794	a3	L2000-02	mTOR	PI3K/Akt/mTOR	KU-0063794 is a potent and highly specific dual-mTOR inhibitor of mTORC1 and mTORC2 with IC50 of ~10 nM in cell-free assays no effect on PI3Ks.	465.54	938440-64-3	16	34.3687	<1		http://selleckchem.com/products/KU-0063794.html	C25H31N5O4	free base	N/A	COC1=C(CO)C=C(C=C1)C2=NC3=NC(=NC(=C3C=C2)N4CCOCC4)N5CC(C)OC(C)C5	3.274	6	1	5
S1230	Flavopiridol (Alvocidib)	b3	L2000-02	CDK	Cell Cycle	Flavopiridol (Alvocidib) competes with ATP to inhibit CDKs including CDK1, CDK2, CDK4, CDK6, and CDK9 with IC50 values in the 20-100 nM range. It is more selective for CDK1, 2, 4, 6, 9 versus CDK7. Flavopiridol is initially found to inhibit EGFR and PKA. Phase 1/2.	401.84	146426-40-6	15	37.3283	<1		http://selleckchem.com/products/Flavopiridol.html	C21H20ClNO5	Free Base	NSC 649890 HCl,HMR-1275	CN1CCC(C(O)C1)C2=C3OC(=CC(=O)C3=C(O)C=C2O)C4=C(Cl)C=CC=C4	3.108	2	3	2
S1244	Amuvatinib (MP-470)	c3	L2000-02	c-Kit,FLT3,PDGFR	Protein Tyrosine Kinase	Amuvatinib (MP-470) is a potent and multi-targeted inhibitor of c-Kit, PDGFRα and Flt3 with IC50 of 10 nM, 40 nM and 81 nM, respectively. Phase 2.	447.51	850879-09-3	32	71.5068	<1		http://selleckchem.com/products/MP-470.html	C23H21N5O3S	free base	HPK 56	S=C(NCC1=CC=C2OCOC2=C1)N3CCN(CC3)C4=NC=NC5=C4OC6=CC=CC=C56	4.867	5	1	5
S1245	Latrepirdine 2HCl	d3	L2000-02	5-HT Receptor,GluR,Histamine Receptor	Neuronal Signaling	Latrepirdine is an orally active,and neuroactive antagonist of multiple drug targets, including histamine receptors, GluR, and 5-HT receptors, used as an antihistamine drug.	392.37	97657-92-6	24	61.1668	<1		http://selleckchem.com/products/Dimebon.html	C21H27Cl2N3	Dihydrochloride	N/A	Cl.Cl.CN1CCC2=C(C1)C3=C(C=CC(=C3)C)[N]2CCC4=CC=C(C)N=C4	4.769	1	0	3
S1249	JNJ-7706621	e3	L2000-02	Aurora Kinase,CDK	Cell Cycle	JNJ-7706621 is pan-CDK inhibitor with the highest potency on CDK1/2 with IC50 of 9 nM/4 nM and showing >6-fold selectivity for CDK1/2 than CDK3/4/6 in cell-free assays. It also potently inhibits Aurora A/B and has no activity on Plk1 and Wee1.	394.36	443797-96-4	79	200.325	<1		http://selleckchem.com/products/JNJ-7706621.html	C15H12F2N6O3S	free base	N/A	NC1=NC(=N[N]1C(=O)C2=C(F)C=CC=C2F)NC3=CC=C(C=C3)[S](N)(=O)=O	2.226	5	3	4
S1262	Avagacestat (BMS-708163)	f3	L2000-02	Beta Amyloid,Gamma-secretase	Proteases	Avagacestat (BMS-708163) is a potent, selective, orally bioavailable γ-secretase inhibitor of Aβ40 and Aβ42 with IC50 of 0.3 nM and 0.27 nM, demonstrating a 193-fold selectivity against Notch. Phase 2.	520.88	1146699-66-2	104	199.662	<1		http://selleckchem.com/products/BMS-708163.html	C20H17ClF4N4O4S	free base	N/A	NC(=O)C(CCC(F)(F)F)N(CC1=C(F)C=C(C=C1)C2=NOC=N2)[S](=O)(=O)C3=CC=C(Cl)C=C3	3.364	6	1	10
S1263	CHIR-99021 (CT99021)	g3	L2000-02	GSK-3	PI3K/Akt/mTOR	CHIR-99021 (CT99021) is a GSK-3α and GSK-3β inhibitor with IC50 of 10 nM and 6.7 nM, respectively. CHIR99201 does not exhibit cross-reactivity against cyclin-dependent kinases (CDKs) and shows a 350-fold selectivity toward GSK-3β compared to CDKs.	465.34	252917-06-9	10	21.4897	<1		http://selleckchem.com/products/CHIR-99021.html	C22H18Cl2N8	free base	N/A	CC1=C[NH]C(=N1)C2=CN=C(NCCNC3=CC=C(C=N3)C#N)N=C2C4=CC=C(Cl)C=C4Cl	4.476	4	3	7
S1264	PD173074	h3	L2000-02	FGFR,VEGFR	Angiogenesis	PD173074 is a potent FGFR1 inhibitor with IC50 of ~25 nM and also inhibits VEGFR2 with IC50 of 100-200 nM in cell-free assays, ~1000-fold selective for FGFR1 than PDGFR and c-Src.	523.67	219580-11-7	100	190.96	<1		http://selleckchem.com/products/PD-173074.html	C28H41N7O3	free base	N/A	CCN(CC)CCCCNC1=NC=C2C=C(C(=NC2=N1)NC(=O)NC(C)(C)C)C3=CC(=CC(=C3)OC)OC	4.313	6	3	13
S1274	BX-795	a4	L2000-02	IκB/IKK,PDK	PI3K/Akt/mTOR	BX795 is a potent and specific PDK1 inhibitor with IC50 of 6 nM, 140- and 1600-fold more selective for PDK1 than PKA and PKC in cell-free assays, respectively. Meanwhile, in comparison to GSK3β more than 100-fold selectivity observed for PDK1.	591.47	702675-74-9	100	169.07	<1		http://selleckchem.com/products/bx-795.html	C23H26IN7O2S	free base	N/A	IC1=CN=C(NC2=CC(=CC=C2)NC(=O)N3CCCC3)N=C1NCCCNC(=O)C4=CC=CS4	3.704	4	4	9
S1275	BX-912	b4	L2000-02	PDK	PI3K/Akt/mTOR	BX912 is a potent and specific PDK1 inhibitor with IC50 of 12 nM, 9- and 105- fold greater selectivity for PDK1 than PKA and PKC in cell-free assays, respectively. In comparison to GSK3β, selectivity for PDK1 is 600-fold.	471.35	702674-56-4	94	199.427	<1		http://selleckchem.com/products/bx-912.html	C20H23BrN8O	free base	N/A	BrC1=CN=C(NC2=CC(=CC=C2)NC(=O)N3CCCC3)N=C1NCCC4=CN=C[NH]4	2.798	4	4	7
S1290	Celastrol	c4	L2000-02	Proteasome	Proteases	Celastrol is a potent proteasome inhibitor for the chymotrypsin-like activity of a purified 20S proteasome with IC50 of 2.5 μM.	450.61	34157-83-0	90	199.729	<1		http://selleckchem.com/products/Celastrol.html	C29H38O4	free base	Tripterine	CC1=C(O)C(=O)C=C2C1=CC=C3C2(C)CCC4(C)C5CC(C)(CCC5(C)CCC34C)C(O)=O	5.475	2	1	1
S1297	Epothilone A	d4	L2000-02	Microtubule Associated	Cytoskeletal Signaling	Epothilone A is a paclitaxel-like microtubule-stabilizing agent with EC0.01 of 2 μM.	493.66	152044-53-6	99	200.543	<1		http://selleckchem.com/products/Epothilone-A.html	C26H39NO6S	free base	N/A	CC1CCCC2OC2CC(OC(=O)CC(O)C(C)(C)C(=O)C(C)C1O)\C(C)=C\C3=CSC(=N3)C	3.574	5	2	2
S1315	Ki16425	e4	L2000-02	LPA Receptor	GPCR & G Protein	Ki16425 is a competitive, potent and reversible antagonist to LPA1, LPA2 and LPA3 with Ki of 0.34 μM, 6.5 μM and 0.93 μM in RH7777 cell lines, respectively, shows no activity at LPA4, LPA5, LPA6.	474.96	355025-24-0	94	197.911	<1		http://selleckchem.com/products/Ki16425.html	C23H23ClN2O5S	free base	N/A	CC(OC(=O)NC1=C(ON=C1C)C2=CC=C(CSCCC(O)=O)C=C2)C3=C(Cl)C=CC=C3	5.043	5	1	10
S1343	Ginkgolide B	f4	L2000-02	PAFR	GPCR & G Protein	Ginkgolide B is a PAFR antagonist with IC50 of 3.6 μM.	424.4	15291-77-7	85	200.283	<1		http://selleckchem.com/products/Ginkgolide-B.html	C20H24O10	free base	BN52021	CC1C(=O)OC2C(O)C34C5CC(C(C)(C)C)C36C(O)C(=O)OC6OC4(C(=O)O5)C12O	-0.854	7	2	1
S1352	TG100-115	g4	L2000-02	PI3K	PI3K/Akt/mTOR	TG100-115 is a PI3Kγ/δ inhibitor with IC50 of 83 nM/235 nM, with little effect on PI3Kα/β. Phase 1/2.	346.34	677297-51-7	9	25.986	<1		http://selleckchem.com/products/TG100-115.html	C18H14N6O2	free base	N/A	NC1=NC2=NC(=C(N=C2C(=N1)N)C3=CC(=CC=C3)O)C4=CC=CC(=C4)O	2.687	4	4	2
S1361	Glesatinib?(MGCD265)	h4	L2000-02	c-Met,Tie-2,VEGFR	Protein Tyrosine Kinase	Glesatinib?(MGCD265) is a potent, multi-target and ATP-competitive inhibitor of c-Met and VEGFR1/2/3 with IC50 of 1 nM, 3 nM/3 nM/4 nM, respectively also inhibits Ron and Tie2. Phase 1/2.	517.6	875337-44-3	104	200.927	<1		http://selleckchem.com/products/MGCD-265.html	C26H20FN5O2S2	free base	N/A	C[N]1C=NC(=C1)C2=CC3=NC=CC(=C3S2)OC4=CC=C(NC(=S)NC(=O)CC5=CC=CC=C5)C=C4F	6.037	4	2	8
S1362	Rigosertib (ON-01910)	a5	L2000-02	PLK	Cell Cycle	Rigosertib (ON-01910) is a non-ATP-competitive inhibitor of PLK1 with IC50 of 9 nM in a cell-free assay. It shows 30-fold greater selectivity against Plk2 and no activity to Plk3. Phase 3.	473.47	1225497-78-8	95	200.646	95	200.646	http://selleckchem.com/products/ON-01910.html	C21H24NNaO8S	Sodium Salt	N/A	[Na+].COC1=CC(=C(\C=C\[S](=O)(=O)CC2=CC=C(OC)C(=C2)NCC([O-])=O)C(=C1)OC)OC	0.632	6	1	11
S1364	Patupilone (EPO906, Epothilone B)	b5	L2000-02	Microtubule Associated	Cytoskeletal Signaling	Patupilone (EPO906, Epothilone B) is a paclitaxel-like microtubule-stabilizing agent with EC0.01 of 1.8 μM. Phase 2.	507.68	152044-54-7	102	200.914	<1		http://selleckchem.com/products/Epothilone-B.html	C27H41NO6S	free base	N/A	CC1CCCC2(C)OC2CC(OC(=O)CC(O)C(C)(C)C(=O)C(C)C1O)\C(C)=C\C3=CSC(=N3)C	3.779	5	2	2
S1366	BMS-707035	c5	L2000-02	Integrase	Microbiology	BMS-707035 is a specific HIV-I integrase (IN) inhibitor with IC50 of 15 nM. Phase 2.	410.42	729607-74-3	38	92.5881	<1		http://selleckchem.com/products/BMS-707035.html	C17H19FN4O5S	free base	N/A	CN1C(=O)C(=C(N=C1N2CCCC[S]2(=O)=O)C(=O)NCC3=CC=C(F)C=C3)O	0.385	5	2	4
S1369	Bafetinib (INNO-406)	d5	L2000-02	Bcr-Abl	Angiogenesis	Bafetinib (INNO-406) is a potent and selective dual Bcr-Abl/Lyn inhibitor with IC50 of 5.8 nM/19 nM in cell-free assays, does not inhibit the phosphorylation of the T315I mutant and is less potent to PDGFR and c-Kit. Phase 2.	576.62	859212-16-1	100	173.424	<1		http://selleckchem.com/products/Bafetinib.html	C30H31F3N8O	free base	NS-187	CN(C)C1CCN(C1)CC2=CC=C(C=C2C(F)(F)F)C(=O)NC3=CC=C(C)C(=C3)NC4=NC=CC(=N4)C5=CN=CN=C5	4.197	5	2	9
S1392	Pelitinib (EKB-569)	e5	L2000-02	EGFR	Protein Tyrosine Kinase	Pelitinib (EKB-569) is a potent irreversible EGFR inhibitor with IC50 of 38.5 nM. Phase2.	467.92	257933-82-7	13	27.7825	<1		http://selleckchem.com/products/Pelitinib.html	C24H23ClFN5O2	free base	N/A	CCOC1=C(NC(=O)\C=C\CN(C)C)C=C2C(=C1)N=CC(=C2NC3=CC(=C(F)C=C3)Cl)C#N	4.455	3	2	8
S1452	Ispinesib (SB-715992)	f5	L2000-02	Kinesin	Cytoskeletal Signaling	Ispinesib (SB-715992) is a potent, specific and reversible inhibitor of kinesin spindle protein (KSP) with Ki app of 1.7 nM in a cell-free assay, no inhibition to CENP-E, RabK6, MCAK, MKLP1, KHC or Kif1A. Phase 2.	517.06	336113-53-2	103	199.203	<1		http://selleckchem.com/products/Ispinesib-mesilate(SB-715992).html	C30H33ClN4O2	free base	CK0238273	CC(C)C(N(CCCN)C(=O)C1=CC=C(C)C=C1)C2=NC3=C(C=CC(=C3)Cl)C(=O)N2CC4=CC=CC=C4	5.259	3	1	9
S1454	PHA-680632	g5	L2000-02	Aurora Kinase	Cell Cycle	PHA-680632 is potent inhibitor of Aurora A, Aurora B and Aurora C with IC50 of 27 nM, 135 nM and 120 nM, respectively. It has 10- to 200-fold higher IC50 for FGFR1, FLT3, LCK, PLK1, STLK2, and VEGFR2/3.	501.62	398493-79-3	100	199.354	<1		http://selleckchem.com/products/PHA-680632.html	C28H35N7O2	free base	N/A	CCC1=CC=CC(=C1NC(=O)N2CC3=C(C2)C(=N[NH]3)NC(=O)C4=CC=C(C=C4)N5CCN(C)CC5)CC	4.339	3	3	6
S1455	Cilomilast	h5	L2000-02	PDE	Metabolism	Cilomilast is a potent PDE4 inhibitor with IC50 of about 110 nM, has anti-inflammatory activity and low central nervous system activity. Phase 3.	343.42	153259-65-5	69	200.92	<1		http://selleckchem.com/products/Cilomilast(SB-207499).html	C20H25NO4	free base	SB-207499	COC1=C(OC2CCCC2)C=C(C=C1)C3(CCC(CC3)C(O)=O)C#N	4.174	3	0	5
S1456	Zibotentan (ZD4054)	a6	L2000-02	Endothelin Receptor	GPCR & G Protein	Zibotentan (ZD4054) is a specific Endothelin (ET)A antagonist with IC50 of 21 nM, exhibiting no activity at ETB. Phase 3.	424.43	186497-07-4	24	56.5464	<1		http://selleckchem.com/products/Zibotentan(ZD4054).html	C19H16N6O4S	free base	N/A	COC1=NC(=CN=C1N[S](=O)(=O)C2=CC=CN=C2C3=CC=C(C=C3)C4=NN=CO4)C	1.456	9	1	6
S1460	SP600125	b6	L2000-02	JNK	MAPK	SP600125 is a broad-spectrum JNK inhibitor for JNK1, JNK2 and JNK3 with IC50 of 40 nM, 40 nM and 90 nM in cell-free assays, respectively 10-fold greater selectivity against MKK4, 25-fold greater selectivity against MKK3, MKK6, PKB, and PKCα, and 100-fold selectivity against ERK2, p38, Chk1, EGFR etc.	220.23	129-56-6	44	199.791	<1		http://selleckchem.com/products/SP600125.html	C14H8N2O	free base	Nsc75890	O=C1C2=C(C=CC=C2)C3=N[NH]C4=CC=CC1=C34	2.994	2	1	0
S1462	AZD6482	c6	L2000-02	PI3K	PI3K/Akt/mTOR	AZD6482 is a PI3Kβ inhibitor with IC50 of 10 nM, 8-, 87- and 109-fold more selective to PI3Kβ than PI3Kδ, PI3Kα and PI3Kγ in cell-free assays. Phase 1.	408.45	1173900-33-8	82	200.759	<1		http://selleckchem.com/products/azd6482.html	C22H24N4O4	free base	KIN-193	CC(NC1=CC=CC=C1C(O)=O)C2=CC(=CN3C(=O)C=C(N=C23)N4CCOCC4)C	2.003	4	1	5
S1470	Orantinib (TSU-68, SU6668)	d6	L2000-02	PDGFR	Protein Tyrosine Kinase	Orantinib (TSU-68, SU6668) has greatest potency against PDGFR autophosphorylation with Ki of 8 nM in a cell-free assay, but also strongly inhibits Flk-1 and FGFR1 trans-phosphorylation, little activity against IGF-1R, Met, Src, Lck, Zap70, Abl and CDK2 does not inhibit EGFR. Phase 3.	310.35	252916-29-3	62	199.774	<1		http://selleckchem.com/products/TSU-68(SU6668).html	C18H18N2O3	free base	NSC 702827	CC1=C(CCC(O)=O)C(=C([NH]1)/C=C/2C(=O)NC3=CC=CC=C23)C	2.868	2	2	4
S1475	Pimasertib (AS-703026)	e6	L2000-02	MEK	MAPK	Pimasertib (AS-703026) is a highly selective, potent, ATP non-competitive allosteric inhibitor of MEK1/2 with IC50 of 5 nM-2 μM in MM cell lines. Phase 2.	431.2	1236699-92-5	86	199.443	<1		http://selleckchem.com/products/AS703026.html	C15H15FIN3O3	free base	MSC1936369B, SAR 245509	OCC(O)CNC(=O)C1=CC=NC=C1NC2=C(F)C=C(I)C=C2	1.171	2	4	6
S1480	Lomibuvir (VX-222, VCH-222)	f6	L2000-02	HCV Protease	Proteases	Lomibuvir (VX-222, VCH-222) is a novel, potent and selective inhibitor of HCV polymerase with IC50 of 0.94-1.2 μM, 15.3-fold less effective for mutant M423T, and 108-fold less effective for mutant I482L. Phase 2.	445.61	1026785-59-0	89	199.726	<1		http://selleckchem.com/products/VX-222.html	C25H35NO4S	free base	N/A	CC1CCC(CC1)C(=O)N(C2CCC(O)CC2)C3=C(SC(=C3)C#CC(C)(C)C)C(O)=O	6.021	2	1	6
S1481	Zosuquidar (LY335979) 3HCl	g6	L2000-02	P-gp	Transmembrane Transporters	Zosuquidar (LY335979) 3HCl is a potent modulator of P-glycoprotein-mediated multi-drug resistance with Ki of 60 nM in a cell-free assay. Phase 3.	636.99	167465-36-3	100	156.988	23	36.1073	http://selleckchem.com/products/LY335979.html	C32H34Cl3F2N3O2	Trihydrochlorid	RS 33295-198 (D06387) 3HCl	Cl.Cl.Cl.OC(COC1=CC=CC2=C1C=CC=N2)CN3CCN(CC3)C4C5=C(C=CC=C5)C6C(C7=C4C=CC=C7)C6(F)F	5.845	2	1	6
S1486	AEE788 (NVP-AEE788)	h6	L2000-02	EGFR,HER2,VEGFR	Protein Tyrosine Kinase	AEE788 (NVP-AEE788) is a potent inhibitor of EGFR and HER2/ErbB2 with IC50 of 2 nM and 6 nM, less potent to VEGFR2/KDR, c-Abl, c-Src, and Flt-1, does not inhibit Ins-R, IGF-1R, PKCα and CDK1. Phase 1/2.	440.58	497839-62-0	88	199.737	<1		http://selleckchem.com/products/AEE788.html	C27H32N6	free base	N/A	CCN1CCN(CC1)CC2=CC=C(C=C2)C3=CC4=C(NC(C)C5=CC=CC=C5)N=CN=C4[NH]3	5.042	2	2	7
S1487	PHA-793887	a7	L2000-02	CDK	Cell Cycle	PHA-793887 is a novel and potent inhibitor of CDK2, CDK5 and CDK7 with IC50 of 8 nM, 5 nM and 10 nM. It is greater than 6-fold more selective for CDK2, 5, and 7 than CDK1, 4, and 9. Phase 1.	361.48	718630-59-2	72	199.181	<1		http://selleckchem.com/products/PHA-793887.html	C19H31N5O2	free base	N/A	CC(C)CC(=O)NC1=N[NH]C2=C1CN(C(=O)C3CCN(C)CC3)C2(C)C	1.895	3	2	4
S1515	Pracinostat (SB939)	b7	L2000-02	HDAC	Cytoskeletal Signaling	Pracinostat (SB939) is a potent pan-HDAC inhibitor with IC50 of 40-140 nM with exception for HDAC6. It has no activity against the class III isoenzyme SIRT I. Phase 2.	358.48	929016-96-6	72	200.848	<1		http://selleckchem.com/products/SB939.html	C20H30N4O2	free base	N/A	CCCCC1=NC2=CC(=CC=C2[N]1CCN(CC)CC)\C=C\C(=O)NO	3.71	2	1	10
S1524	AT7519	c7	L2000-02	CDK	Cell Cycle	AT7519 is a multi-CDK inhibitor for CDK1, 2, 4, 6 and 9 with IC50 of 10-210 nM. It is less potent to CDK3 and little active to CDK7. Phase 2.	382.24	844442-38-2	10	26.1616	<1		http://selleckchem.com/products/AT7519.html	C16H17Cl2N5O2	Free Base	N/A	ClC1=CC=CC(=C1C(=O)NC2=C[NH]N=C2C(=O)NC3CCNCC3)Cl	1.599	3	4	4
S1525	Adavosertib （MK-1775）	d7	L2000-02	Wee1	Cell Cycle	MK-1775 is a potent and selective Wee1 inhibitor with IC50 of 5.2 nM in a cell-free assay hinders G2 DNA damage checkpoint. Phase 2.	500.6	955365-80-7	80	159.808			http://selleckchem.com/products/MK-1775.html	C27H32N8O2	free base	N/A	CN1CCN(CC1)C2=CC=C(NC3=NC4=C(C=N3)C(=O)N(CC=C)N4C5=NC(=CC=C5)C(C)(C)O)C=C2	4.158	4	1	7
S1526	Quizartinib (AC220)	e7	L2000-02	FLT3	Angiogenesis	Quizartinib (AC220) is a second-generation FLT3 inhibitor for Flt3(ITD/WT) with IC50 of 1.1 nM/4.2 nM in MV4-11 and RS411 cells, respectively, 10-fold more selective for Flt3 than KIT, PDGFRα, PDGFRβ, RET, and CSF-1R. Phase 3.	560.67	950769-58-1	33	58.8582	<1		http://selleckchem.com/products/AC-220.html	C29H32N6O4S	free base	N/A	CC(C)(C)C1=CC(=NO1)NC(=O)NC2=CC=C(C=C2)C3=C[N]4C(=N3)SC5=CC(=CC=C45)OCCN6CCOCC6	5.064	6	2	8
S1528	LY2811376	f7	L2000-02	BACE,Beta Amyloid	Proteases	LY2811376 is the first orally available non-peptidic β-secretase(BACE1) inhibitor with IC50 of 239 nM-249 nM, that act to decrease Aβ secretion with EC50 of 300 nM, demonstrated to have 10-fold selectivity towards BACE1 over BACE2, and more than 50-fold inhibition over other aspartic proteases including cathepsin D, pepsin, or renin. Phase 1.	320.36	1194044-20-6	16	49.9438	<1		http://selleckchem.com/products/LY2811376.html	C15H14F2N4S	free base	N/A	CC1(CCSC(=N1)N)C2=CC(=C(F)C=C2F)C3=CN=CN=C3	2.478	3	1	2
S1532	AZD7762	g7	L2000-02	Chk	Cell Cycle	AZD7762 is a potent and selective inhibitor of Chk1 with IC50 of 5 nM in a cell-free assay. It is equally potent against Chk2 and less potent against CAM, Yes, Fyn, Lyn, Hck and Lck. Phase 1.	362.42	860352-01-8	50	137.961	<1		http://selleckchem.com/products/AZD7762.html	C17H19FN4O2S	free base	N/A	NC(=O)NC1=C(SC(=C1)C2=CC(=CC=C2)F)C(=O)NC3CCCNC3	2.009	2	4	4
S1533	R406 (free base)	h7	L2000-02	Syk	Angiogenesis	R406 (free base) is a potent Syk inhibitor with IC50 of 41 nM in a cell-free assay, strongly inhibits Syk but not Lyn, 5-fold less potent to Flt3. Phase 1.	470.45	841290-80-0	21	44.6381	<1		http://selleckchem.com/products/R406(free-base).html	C22H23FN6O5	free base	N/A	COC1=C(OC)C(=CC(=C1)NC2=NC(=C(F)C=N2)NC3=NC4=C(OC(C)(C)C(=O)N4)C=C3)OC	3.881	8	3	7
S1536	CP-673451	a8	L2000-02	PDGFR	Protein Tyrosine Kinase	CP-673451 is a selective inhibitor of PDGFRα/β with IC50 of 10 nM/1 nM in cell-free assays, exhibits >450-fold selectivity over other angiogenic receptors, has antiangiogenic and antitumor activity.	417.5	343787-29-1	28	67.0659	<1		http://selleckchem.com/products/CP-673451.html	C24H27N5O2	free base	N/A	COCCOC1=CC=C2[N](C=NC2=C1)C3=NC4=C(C=CC=C4C=C3)N5CCC(N)CC5	3.011	4	1	6
S1537	DMXAA (Vadimezan)	b8	L2000-02	VDA	Angiogenesis	DMXAA (Vadimezan) is a vascular disrupting agents (VDA) and competitive inhibitor of DT-diaphorase with Ki of 20 μM and IC50 of 62.5 μM in cell-free assays, respectively. Phase 3.	282.29	117570-53-3	7	24.7972	<1		http://selleckchem.com/products/DMXAA(ASA404).html	C17H14O4	free base	NSC 640488, ASA-404	CC1=C(C)C2=C(C=C1)C(=O)C3=C(O2)C(=CC=C3)CC(O)=O	3.601	3	0	2
S1541	Selisistat (EX 527)	c8	L2000-02	Sirtuin	Epigenetics	Selisistat (EX 527) is a potent and selective SIRT1 inhibitor with IC50 of 38 nM in a cell-free assay, exhibits >200-fold selectivity against SIRT2 and SIRT3. Phase 2.	248.71	49843-98-3	49	197.017	<1		http://selleckchem.com/products/EX-527.html	C13H13ClN2O	free base	SEN0014196	NC(=O)C1CCCC2=C1[NH]C3=C2C=C(Cl)C=C3	3.149	1	2	1
S1555	AZD8055	d8	L2000-02	mTOR	PI3K/Akt/mTOR	AZD8055 is a novel ATP-competitive mTOR inhibitor with IC50 of 0.8 nM in MDA-MB-468 cells with excellent selectivity (?1,000-fold) against PI3K isoforms and ATM/DNA-PK. Phase 1.	465.54	1009298-09-2	50	107.402	<1		http://selleckchem.com/products/AZD8055.html	C25H31N5O4	free base	N/A	COC1=C(CO)C=C(C=C1)C2=NC3=C(C=C2)C(=NC(=N3)N4CCOCC4C)N5CCOCC5C	3.274	6	1	5
S1556	PHT-427	e8	L2000-02	Akt,PDK	PI3K/Akt/mTOR	PHT-427 is a dual Akt and PDPK1 inhibitor (high affinity binding for the PH domains of Akt and PDPK1) with Ki of 2.7 μM and 5.2 μM, respectively.	409.61	1191951-57-1	82	200.19	<1		http://selleckchem.com/products/PHT-427.html	C20H31N3O2S2	free base	CS-0223	CCCCCCCCCCCCC1=CC=C(C=C1)[S](=O)(=O)NC2=NN=CS2	6.296	4	1	14
S1557	KRN 633	f8	L2000-02	VEGFR	Protein Tyrosine Kinase	KRN 633 is an ATP-competitive inhibitor of VEGFR1/2/3 with IC50 of 170 nM/160 nM/125 nM, weakly inhibits PDGFR-α/β and c-Kit, does not block the phosphorylation of FGFR-1, EGFR or c-Met in cell.	416.86	286370-15-8	9	21.59	<1		http://selleckchem.com/products/KRN-633.html	C20H21ClN4O4	free base	N/A	CCCNC(=O)NC1=CC=C(OC2=NC=NC3=CC(=C(OC)C=C23)OC)C=C1Cl	4.107	6	2	7
S1558	AT7867	g8	L2000-02	Akt,S6 Kinase	PI3K/Akt/mTOR	AT7867 is a potent ATP-competitive inhibitor of Akt1/2/3 and p70S6K/PKA with IC50 of 32 nM/17 nM/47 nM and 85 nM/20 nM in cell-free assays, respectively little activity outside the AGC kinase family.	337.85	857531-00-1	68	201.273	<1		http://selleckchem.com/products/AT7867.html	C20H20ClN3	free base	N/A	ClC1=CC=C(C=C1)C2(CCNCC2)C3=CC=C(C=C3)C4=C[NH]N=C4	3.85	1	2	3
S1561	BMS-777607	h8	L2000-02	TAM Receptor,c-Met	Protein Tyrosine Kinase	BMS-777607 is a Met-related inhibitor for c-Met, Axl, Ron and Tyro3 with IC50 of 3.9 nM, 1.1 nM, 1.8 nM and 4.3 nM in cell-free assays, 40-fold more selective for Met-related targets versus Lck, VEGFR-2, and TrkA/B, and more than 500-fold greater selectivity versus all other receptor and non receptor kinases. Phase 1/2.	512.89	1025720-94-8	47	91.6376	<1		http://selleckchem.com/products/BMS-777607.html	C25H19ClF2N4O4	free base	N/A	CCOC1=C(C(=O)NC2=CC=C(OC3=CC=NC(=C3Cl)N)C(=C2)F)C(=O)N(C=C1)C4=CC=C(F)C=C4	3.517	5	2	7
S1574	Doramapimod (BIRB 796)	a9	L2000-02	p38 MAPK	MAPK	Doramapimod (BIRB 796) is a pan-p38 MAPK inhibitor with IC50 of 38 nM, 65 nM, 200 nM and 520 nM for p38α/β/γ/δ in cell-free assays, and binds p38α with Kd of 0.1 nM in THP-1 cells, 330-fold greater selectivity versus JNK2, weak inhibition for c-RAF, Fyn and Lck, insignificant inhibition of ERK-1, SYK, IKK2.	527.66	285983-48-4	100	189.516	<1		http://selleckchem.com/products/BIRB-796-(Doramapimod).html	C31H37N5O3	free base	N/A	CC1=CC=C(C=C1)[N]2N=C(C=C2NC(=O)NC3=CC=C(OCCN4CCOCC4)C5=C3C=CC=C5)C(C)(C)C	5.907	4	2	8
S1594	Semagacestat (LY450139)	b9	L2000-02	Gamma-secretase	Proteases	Semagacestat (LY450139) is a γ-secretase blocker for Aβ42, Aβ40 and Aβ38 with IC50 of 10.9 nM, 12.1 nM and 12.0 nM, also inhibits Notch signaling with IC50 of 14.1 nM in H4 human glioma cell. Phase 3.	361.44	425386-60-3	72	199.203	<1		http://selleckchem.com/products/Semagacestat(LY450139).html	C19H27N3O4	free base	N/A	CC(C)C(O)C(=O)NC(C)C(=O)NC1C(=O)N(C)CCC2=C1C=CC=C2	0.632	3	3	5
S1802	AICAR (Acadesine)	c9	L2000-02	AMPK	PI3K/Akt/mTOR	AICAR (Acadesine), an AMPK activator, results in accumulation of ZMP, which mimics the stimulating effect of AMP on AMPK and AMPK kinase. Phase 3.	258.23	2627-69-2	51	197.498	<1		http://selleckchem.com/products/Acadesine.html	C9H14N4O5	free base	NSC105823	NC(=O)C1=C(N)[N](C=N1)C2OC(CO)C(O)C2O	-2.913	3	5	3
S2012	PCI-34051	d9	L2000-02	HDAC	Epigenetics	PCI-34051 is a potent and specific HDAC8 inhibitor with IC50 of 10 nM in a cell-free assay. It has greater than 200-fold selectivity over HDAC1 and 6, more than 1000-fold selectivity over HDAC2, 3, and 10.	296.32	950762-95-5	59	199.109	<1		http://selleckchem.com/products/pci-34051.html	C17H16N2O3	free base	N/A	COC1=CC=C(C[N]2C=CC3=C2C=C(C=C3)C(=O)NO)C=C1	2.911	2	1	4
S2013	PF-573228	e9	L2000-02	FAK	Angiogenesis	PF-573228 is an ATP-competitive inhibitor of FAK with IC50 of 4 nM in a cell-free assay, ~50- to 250-fold selective for FAK than Pyk2, CDK1/7 and GSK-3β.	491.49	869288-64-2	26	52.9004	<1		http://selleckchem.com/products/pf-573228.html	C22H20F3N5O3S	free base	N/A	C[S](=O)(=O)C1=CC(=CC=C1)CNC2=NC(=NC=C2C(F)(F)F)NC3=CC4=C(NC(=O)CC4)C=C3	3.967	5	3	7
S2014	BMS-265246	f9	L2000-02	CDK	Cell Cycle	BMS-265246 is a potent and selective CDK1/2 inhibitor with IC50 of 6 nM/9 nM in a cell-free assay. It is 25-fold more selective for CDK1/2 than CDK4.	345.34	582315-72-8	20	57.9139	<1		http://selleckchem.com/products/bms-265246.html	C18H17F2N3O2	free base	N/A	CCCCOC1=C2C=N[NH]C2=NC=C1C(=O)C3=C(F)C=C(C)C=C3F	4.135	4	1	6
S2018	ENMD-2076 L-(+)-Tartaric acid	g9	L2000-02	Aurora Kinase,FLT3,VEGFR	Angiogenesis	ENMD-2076 L-(+)-Tartaric acid is the tartaric acid of ENMD-2076, selective activity against Aurora A and Flt3 with IC50 of 14 nM and 1.86 nM, 25-fold more selective for Aurora A than Aurora B and less potent to VEGFR2/KDR and VEGFR3, FGFR1 and FGFR2 and PDGFRα. Phase 2.	525.56	1291074-87-7	100	190.273	<1		http://selleckchem.com/products/enmd-2076-l-tartaric-acid.html	C25H31N7O6	free base	N/A	CN1CCN(CC1)C2=NC(=NC(=C2)NC3=N[NH]C(=C3)C)\C=C\C4=CC=CC=C4.OC(C(O)C(O)=O)C(O)=O	-0.683	5	4	8
S2134	AZD8330	h9	L2000-02	MEK	MAPK	AZD8330 is a novel, selective, non-ATP competitive MEK 1/2 inhibitor with IC50 of 7 nM. Phase 1.	461.23	869357-68-6	92	199.467	<1		http://selleckchem.com/products/AZD8330(ARRY-424704).html	C16H17FIN3O4	free base	ARRY704	CN1C(=O)C(=CC(=C1NC2=C(F)C=C(I)C=C2)C(=O)NOCCO)C	1.653	3	3	6
S2149	GSK1292263	a10	L2000-02	GPR	Endocrinology & Hormones	GSK1292263 is a novel GPR119 agonist, showing potential for the treatment of type 2 diabetes. Phase 2.	456.56	1032823-75-8	34	74.4699	<1		http://selleckchem.com/products/GSK1292263.html	C23H28N4O4S	free base	N/A	CC(C)C1=NOC(=N1)N2CCC(CC2)COC3=CN=C(C=C3)C4=CC=C(C=C4)[S](C)(=O)=O	3.893	7	0	7
S2153	CGS 21680 HCl	b10	L2000-02	Adenosine Receptor	GPCR & G Protein	CGS 21680 HCl is an adenosine A2 receptor agonist with IC50 of 22 nM, exhibits 140-fold over A1 receptor.	535.98	124431-80-7	100	186.574	<1		http://selleckchem.com/products/CGS-21680-hydrochloride.html	C23H30ClN7O6	Hydrochloride	N/A	Cl.CCNC(=O)C1OC(C(O)C1O)[N]2C=NC3=C2N=C(NCCC4=CC=C(CCC(O)=O)C=C4)N=C3N	0.911	6	5	10
S2155	LY2608204	c10	L2000-02	Others	Others	LY2608204 activates glucokinase (GK) with EC50 of 42 nM. Phase 2.	559.81	1234703-40-2	112	200.068	<1		http://selleckchem.com/products/ly2608204.html	C28H37N3O3S3	free base	N/A	O=C(NC1=NC=C(SCCN2CCCC2)S1)C3(CC3C4CCCCC4)C5=CC=C(C=C5)[S](=O)(=O)C6CC6	5.393	4	1	10
S2156	LY2886721	d10	L2000-02	BACE	Neuronal Signaling	LY2886721 is a BACE inhibitor used for the treatment of Alzheimer's Disease. Phase 1/2.	390.41	1262036-50-9	9	23.0527	<1		http://selleckchem.com/products/LY-2886721.html	C18H16F2N4O2S	free base	N/A	NC1=NC2(COCC2CS1)C3=CC(=CC=C3F)NC(=O)C4=NC=C(F)C=C4	2.134	4	2	3
S2158	KW-2449	e10	L2000-02	Aurora Kinase,Bcr-Abl,FLT3	Angiogenesis	KW-2449 is a multiple-targeted inhibitor, mostly for Flt3 with IC50 of 6.6 nM, modestly potent to FGFR1, Bcr-Abl and Aurora A little effect on PDGFRβ, IGF-1R, EGFR. Phase 1.	332.4	1000669-72-6	67	201.564	<1		http://selleckchem.com/products/KW-2449.html	C20H20N4O	free base	N/A	O=C(N1CCNCC1)C2=CC=C(C=C2)/C=C/C3=N[NH]C4=C3C=CC=C4	2.723	2	2	3
S2160	Almorexant HCl	f10	L2000-02	OX Receptor	GPCR & G Protein	Almorexant HCl is an orally active, dual orexin receptor antagonist with IC50 of 6.6 nM and 3.4 nM for OX1 and OX2 receptor, respectively. Phase 3.	549.02	913358-93-7	72	131.143	<1		http://selleckchem.com/products/almorexant-hcl.html	C29H32ClF3N2O3	Hydrochloride	N/A	Cl.CNC(=O)C(N1CCC2=C(C=C(OC)C(=C2)OC)C1CCC3=CC=C(C=C3)C(F)(F)F)C4=CC=CC=C4	6.438	3	1	9
S2161	RAF265 (CHIR-265)	g10	L2000-02	Raf,VEGFR	MAPK	RAF265 (CHIR-265) is a potent selective inhibitor of C-Raf/B-Raf/B-Raf V600E with IC50 of 3-60 nM, and exhibits potent inhibition on VEGFR2 phosphorylation with EC50 of 30 nM in cell-free assays. Phase 2.	518.41	927880-90-8	100	192.898	<1		http://selleckchem.com/products/RAF265(CHIR-265).html	C24H16F6N6O	free base	N/A	C[N]1C(=NC2=C1C=CC(=C2)OC3=CC=NC(=C3)C4=NC=C([NH]4)C(F)(F)F)NC5=CC=C(C=C5)C(F)(F)F	6.469	4	2	7
S2170	Givinostat (ITF2357)	h10	L2000-02	HDAC	Cytoskeletal Signaling	Givinostat (ITF2357) is a potent HDAC inhibitor for maize HD2, HD1B and HD1A with IC50 of 10 nM, 7.5 nM and 16 nM in cell-free assays. Phase 2.	475.97	732302-99-7	95	199.592	<1		http://selleckchem.com/products/ITF2357(Givinostat).html	C24H30ClN3O5	Chloride	N/A	O.Cl.CCN(CC)CC1=CC2=C(C=C1)C=C(COC(=O)NC3=CC=C(C=C3)C(=O)NO)C=C2	4.046	3	2	9
S2178	AG-14361	a11	L2000-02	PARP	DNA Damage	AG14361 is a potent inhibitor of PARP1 with Ki of <5 nM in a cell-free assay. It is at least 1000-fold more potent than the benzamides.	320.39	328543-09-5	12	37.4544	<1		http://selleckchem.com/products/AG14361.html	C19H20N4O	free base	N/A	CN(C)CC1=CC=C(C=C1)C2=NC3=CC=CC4=C3[N]2CCNC4=O	2.576	2	1	3
S2179	Gandotinib (LY2784544)	b11	L2000-02	JAK	JAK/STAT	Gandotinib (LY2784544) is a potent JAK2 inhibitor with IC50 of 3 nM, effective in JAK2V617F, 8- and 20-fold selective versus JAK1 and JAK3. Phase 2.	469.94	1229236-86-5	94	200.026	<1		http://selleckchem.com/products/LY2784544.html	C23H25ClFN7O	free base	N/A	CC1=N[NH]C(=C1)NC2=N[N]3C(=C(C)N=C3C(=C2)CN4CCOCC4)CC5=CC=C(Cl)C=C5F	3.938	4	2	6
S2182	SB743921 HCl	c11	L2000-02	Kinesin	Cytoskeletal Signaling	SB743921 is a kinesin spindle protein (KSP) inhibitor with Ki of 0.1 nM, almost no affinity to MKLP1, Kin2, Kif1A, Kif15, KHC, Kif4 and CENP-E. Phase 1/2.	553.52	940929-33-9	111	200.535	22	39.7456	http://selleckchem.com/products/SB-743921.html	C31H34Cl2N2O3	Hydrochloride	N/A	Cl.CC(C)C(N(CCCN)C(=O)C1=CC=C(C)C=C1)C2=C(CC3=CC=CC=C3)C(=O)C4=C(O2)C=C(Cl)C=C4	6.536	3	1	9
S2185	AST-1306	d11	L2000-02	EGFR	Protein Tyrosine Kinase	AST-1306 is a novel irreversible inhibitor of EGFR and ErbB2 with IC50 of 0.5 nM and 3 nM, also effective in mutation EGFR T790M/L858R, more potent to ErbB2-overexpressing cells, 3000-fold selective for ErbB family than other kinases.	621.08	1050500-29-2	124	199.652	<1		http://selleckchem.com/products/ast-1306.html	C31H26ClFN4O5S	Mesylate	AST-6	CC1=CC=C(C=C1)[S](O)(=O)=O.FC2=CC(=CC=C2)COC3=CC=C(NC4=C5C=C(NC(=O)C=C)C=CC5=NC=N4)C=C3Cl	7.381	4	2	8
S2186	SB505124	e11	L2000-02	TGF-beta/Smad	TGF-beta/Smad	SB505124 is a selective inhibitor of TGFβR for ALK4, ALK5 with IC50 of 129 nM and 47 nM in cell-free assays, respectively, also inhibits ALK7, but does not inhibit ALK1, 2, 3, or 6.	335.4	694433-59-5	67	199.761	<1		http://selleckchem.com/products/sb-505124.html	C20H21N3O2	free base	N/A	CC1=CC=CC(=N1)C2=C(N=C([NH]2)C(C)(C)C)C3=CC4=C(OCO4)C=C3	4.609	4	1	3
S2187	Avasimibe	f11	L2000-02	P450 (e.g. CYP17)	Metabolism	Avasimibe inhibits ACAT with IC50 of 3.3 μM, also inhibits human P450 isoenzymes CYP2C9, CYP1A2 and CYP2C19 with IC50 of 2.9 μM, 13.9 μM and 26.5 μM, respectively.	501.72	166518-60-1	100	199.314	<1		http://selleckchem.com/products/Avasimibe(CI-1011).html	C29H43NO4S	free base	CI-1011	CC(C)C1=CC(=C(CC(=O)N[S](=O)(=O)OC2=C(C=CC=C2C(C)C)C(C)C)C(=C1)C(C)C)C(C)C	8.227	2	1	10
S2192	Sapitinib (AZD8931)	g11	L2000-02	EGFR,HER2	Protein Tyrosine Kinase	Sapitinib (AZD8931) is a reversible, ATP competitive inhibitor of EGFR, ErbB2 and ErbB3 with IC50 of 4 nM, 3 nM and 4 nM in cell-free assays, more potent than Gefitinib or Lapatinib against NSCLC cell, 100-fold more selective for the ErbB family than MNK1 and Flt. Phase 2.	473.93	848942-61-0	40	84.4006	<1		http://selleckchem.com/products/AZD8931.html	C23H25ClFN5O3	free base	N/A	CNC(=O)CN1CCC(CC1)OC2=C(OC)C=C3N=CN=C(NC4=C(F)C(=CC=C4)Cl)C3=C2	3.485	5	2	7
S2193	GSK461364	h11	L2000-02	PLK	Cell Cycle	GSK461364 inhibits purified Plk1 with Ki of 2.2 nM in a cell-free assay. It is more than 1000-fold selective against Plk2/3. Phase 1.	543.6	929095-18-1	10	18.3959	<1		http://selleckchem.com/products/GSK461364.html	C27H28F3N5O2S	free base	N/A	CC(OC1=C(SC(=C1)[N]2C=NC3=C2C=C(CN4CCN(C)CC4)C=C3)C(N)=O)C5=CC=CC=C5C(F)(F)F	5.125	3	1	8
S2194	R406	a2	L2000-03	FLT3,Syk	Angiogenesis	R406 is a potent Syk inhibitor with IC50 of 41 nM in cell-free assays, strongly inhibits Syk but not Lyn, 5-fold less potent to Flt3. Phase 1.	628.63	841290-81-1	100	159.076	<1		http://selleckchem.com/products/R406.html	C28H29FN6O8S	Besylate	N/A	COC1=C(OC)C(=CC(=C1)NC2=NC(=C(F)C=N2)NC3=NC4=C(OC(C)(C)C(=O)N4)C=C3)OC.O[S](=O)(=O)C5=CC=CC=C5	5.044	8	3	8
S2195	Lexibulin (CYT997)	b2	L2000-03	Microtubule Associated	Cytoskeletal Signaling	Lexibulin (CYT997) is a potent microtubule polymerization inhibitor with IC50 of 10-100 nM in cancer cell lines. Phase 2.	434.53	917111-44-5	86	197.915	<1		http://selleckchem.com/products/CYT997.html	C24H30N6O2	free base	N/A	CCCC(NC1=C(C)C=NC(=N1)C2=CC(=C(NC(=O)NCC)C=C2)OC)C3=CC=CN=C3	3.744	5	3	9
S2198	SGI-1776 free base	c2	L2000-03	Pim	JAK/STAT	SGI-1776 free base is a novel ATP competitive inhibitor of Pim1 with IC50 of 7 nM in a cell-free assay, 50- and 10-fold selective versus Pim2 and Pim3, also potent to Flt3 and haspin. Phase 1.	405.42	1025065-69-3	81	199.793	<1		http://selleckchem.com/products/SGI-1776.html	C20H22F3N5O	free base	N/A	CN1CCC(CC1)CNC2=N[N]3C(=NC=C3C4=CC=CC(=C4)OC(F)(F)F)C=C2	5.206	3	1	6
S2201	BMS-794833	d2	L2000-03	c-Met,VEGFR	Protein Tyrosine Kinase	BMS-794833 is a potent ATP competitive inhibitor of Met/VEGFR2 with IC50 of 1.7 nM/15 nM, also inhibits Ron, Axl and Flt3 with IC50 of <3 nM a prodrug of BMS-817378. Phase 1.	468.84	1174046-72-0	94	200.495	<1		http://selleckchem.com/products/BMS-794833.html	C23H15ClF2N4O3	free base	N/A	NC1=NC=CC(=C1Cl)OC2=CC=C(NC(=O)C3=CNC=C(C3=O)C4=CC=C(F)C=C4)C=C2F	2.85	4	3	5
S2214	AZ 960	e2	L2000-03	JAK	JAK/STAT	AZ 960 is a novel ATP competitive JAK2 inhibitor with IC50 and Ki of <3 nM and 0.45 nM, 3-fold selectivity of AZ960 for JAK2 over JAK3.	354.36	905586-69-8	71	200.361	<1		http://selleckchem.com/products/AZ-960.html	C18H16F2N6	free base	N/A	CC(NC1=NC(=C(F)C=C1C#N)NC2=N[NH]C(=C2)C)C3=CC=C(F)C=C3	4.495	2	3	5
S2215	DAPT (GSI-IX)	f2	L2000-03	Beta Amyloid,Gamma-secretase	Proteases	DAPT (GSI-IX) is a novel γ-secretase inhibitor, which inhibits Aβ production with IC50 of 20 nM in HEK 293 cells.	432.46	208255-80-5	86	198.862	<1		http://selleckchem.com/products/DAPT-GSI-IX.html	C23H26F2N2O4	free base	LY-374973	CC(NC(=O)CC1=CC(=CC(=C1)F)F)C(=O)NC(C(=O)OC(C)(C)C)C2=CC=CC=C2	3.385	4	2	9
S2216	Mubritinib (TAK 165)	g2	L2000-03	HER2	Protein Tyrosine Kinase	Mubritinib (TAK-165) is a potent inhibitor of HER2/ErbB2 with IC50 of 6 nM in BT-474 cell no activity to EGFR, FGFR, PDGFR, JAK1, Src and Blk in BT-474 cell line. Phase 1.	468.47	366017-09-6	13	27.7499	<1		http://selleckchem.com/products/Mubritinib-TAK-165.html	C25H23F3N4O2	free base	N/A	FC(F)(F)C1=CC=C(\C=C\C2=NC(=CO2)COC3=CC=C(CCCC[N]4C=CN=N4)C=C3)C=C1	5.844	5	0	11
S2219	Momelotinib (CYT387)	h2	L2000-03	JAK	JAK/STAT	Momelotinib (CYT387) is an ATP-competitive inhibitor of JAK1/JAK2 with IC50 of 11 nM/18 nM, ~10-fold selectivity versus JAK3. Phase 3.	414.46	1056634-68-4	74	178.546	<1		http://selleckchem.com/products/Cyt387.html	C23H22N6O2	free base	LM-1149 , CYT11387	O=C(NCC#N)C1=CC=C(C=C1)C2=NC(=NC=C2)NC3=CC=C(C=C3)N4CCOCC4	2.857	4	2	6
S2220	SB590885	a3	L2000-03	Raf	MAPK	SB590885 is a potent B-Raf inhibitor with Ki of 0.16 nM in a cell-free assay, 11-fold greater selectivity for B-Raf over c-Raf, no inhibition to other human kinases.	453.54	405554-55-4	5	11.0244	<1		http://selleckchem.com/products/SB590885.html	C27H27N5O2	free base	N/A	CN(C)CCOC1=CC=C(C=C1)C2=NC(=C([NH]2)C3=CC=C\4C(=C3)CCC4=N\O)C5=CC=NC=C5	4.503	4	1	7
S2224	UK 383367	b3	L2000-03	Procollagen C Proteinase	Metabolism	UK-383367 is a procollagen C-proteinase inhibitor with IC50 of 44 nM, has excellent selectivity over MMPs.	324.38	348622-88-8	65	200.382	<1		http://selleckchem.com/products/UK-383367.html	C15H24N4O4	free base	N/A	NC(=O)C1=NOC(=N1)C(CCCC2CCCCC2)CC(=O)NO	1.731	5	2	8
S2228	Belnacasan (VX-765)	c3	L2000-03	Caspase	Apoptosis	Belnacasan (VX-765) is a potent and selective inhibitor of caspase-1 with Ki of 0.8 nM in a cell-free assay. Phase 2.	509	273404-37-8	100	196.464	<1		http://selleckchem.com/products/VX-765.html	C24H33ClN4O6	free base	N/A	CCOC1OC(=O)CC1NC(=O)C2CCCN2C(=O)C(NC(=O)C3=CC(=C(N)C=C3)Cl)C(C)(C)C	1.698	6	3	8
S2230	Galunisertib (LY2157299)	d3	L2000-03	TGF-beta/Smad	TGF-beta/Smad	Galunisertib (LY2157299) is a potent TGFβ receptor I (TβRI) inhibitor with IC50 of 56 nM in a cell-free assay. Phase 2/3.	369.42	700874-72-2	74	200.314	<1		http://selleckchem.com/products/ly2157299.html	C22H19N5O	free base	N/A	CC1=CC=CC(=N1)C2=N[N]3CCCC3=C2C4=CC=NC5=C4C=C(C=C5)C(N)=O	3.095	4	1	3
S2231	Telatinib	e3	L2000-03	c-Kit,PDGFR,VEGFR	Protein Tyrosine Kinase	Telatinib is a potent inhibitor of VEGFR2/3, c-Kit and PDGFRα with IC50 of 6 nM/4 nM, 1 nM and 15 nM, respectively. Phase 2.	409.83	332012-40-5	82	200.083	<1		http://selleckchem.com/products/Telatinib-BAY-57-9352.html	C20H16ClN5O3	free base	BAY 57-9352	CNC(=O)C1=NC=CC(=C1)COC2=NN=C(NC3=CC=C(Cl)C=C3)C4=C2OC=C4	3.861	6	2	6
S2235	Volasertib (BI 6727)	f3	L2000-03	PLK	Cell Cycle	Volasertib (BI 6727) is a highly potent Plk1 inhibitor with IC50 of 0.87 nM in a cell-free assay. It shows 6- and 65-fold greater selectivity against Plk2 and Plk3. Phase 3.	618.81	755038-65-4	20	32.3201	<1		http://selleckchem.com/products/BI6727-Volasertib.html	C34H50N8O3	free base	N/A	CCC1N(C(C)C)C2=C(C=NC(=N2)NC3=CC=C(C=C3OC)C(=O)NC4CCC(CC4)N5CCN(CC5)CC6CC6)N(C)C1=O	4.838	5	2	10
S2238	Palomid 529 (P529)	g3	L2000-03	mTOR	PI3K/Akt/mTOR	Palomid 529 (P529) inhibits both the mTORC1 and mTORC2 complexes, reduces phosphorylation of pAktS473, pGSK3βS9, and pS6 but no effect observed on pMAPK or pAktT308. Phase 1.	406.43	914913-88-5	81	199.296	<1		http://selleckchem.com/products/Palomid-529-P529.html	C24H22O6	free base	SG 00529	COC1=CC=C(COC2=C(OC)C=C3C(=C2)OC(=O)C4=C3C=CC(=C4)C(C)O)C=C1	4.257	5	1	6
S2243	Degrasyn (WP1130)	h3	L2000-03	Bcr-Abl,DUB	Angiogenesis	Degrasyn (WP1130) is a selective deubiquitinase (DUB: USP5, UCH-L1, USP9x, USP14, and UCH37) inhibitor and also suppresses Bcr/Abl, also a JAK2 transducer (without affecting 20S proteasome) and activator of transcription (STAT).	384.27	856243-80-6	77	200.38	<1		http://selleckchem.com/products/WP1130.html	C19H18BrN3O	free base	N/A	CCCC(NC(=O)/C(=C/C1=NC(=CC=C1)Br)C#N)C2=CC=CC=C2	4.546	2	1	6
S2244	AR-42	a4	L2000-03	HDAC	Epigenetics	AR-42 is an HDAC inhibitor with IC50 of 30 nM. Phase 1.	312.36	935881-37-1	63	201.69	<1		http://selleckchem.com/products/AR-42-HDAC-42.html	C18H20N2O3	free base	HDAC-42	CC(C)C(C(=O)NC1=CC=C(C=C1)C(=O)NO)C2=CC=CC=C2	2.834	2	2	5
S2247	Buparlisib (BKM120, NVP-BKM120)	b4	L2000-03	PI3K	PI3K/Akt/mTOR	Buparlisib (BKM120, NVP-BKM120) is a selective PI3K inhibitor of p110α/β/δ/γ with IC50 of 52 nM/166 nM/116 nM/262 nM in cell-free assays, respectively. Reduced potency against VPS34, mTOR, DNAPK, with little activity to PI4Kβ. Phase 2.	410.39	944396-07-0	82	199.81	<1		http://selleckchem.com/products/BKM-120.html	C18H21F3N6O2	free base	N/A	NC1=CC(=C(C=N1)C2=NC(=NC(=C2)N3CCOCC3)N4CCOCC4)C(F)(F)F	2.342	5	1	4
S2248	Silmitasertib (CX-4945)	c4	L2000-03	Casein Kinase	Metabolism	Silmitasertib (CX-4945) is a potent and selective inhibitor of CK2 (casein kinase 2) with IC50 of 1 nM in a cell-free assay, less potent to Flt3, Pim1 and CDK1 (inactive in cell-based assay). Phase 1/2.	349.77	1009820-21-6	16	45.7443	<1		http://selleckchem.com/products/cx-4945-silmitasertib.html	C19H12ClN3O2	free base	N/A	OC(=O)C1=CC2=C(C=C1)C3=CN=CC=C3C(=N2)NC4=CC(=CC=C4)Cl	4.157	3	1	3
S2250	(-)-Epigallocatechin Gallate	d4	L2000-03	DNA Methyltransferase,HER2,Telomerase,EGFR,Fatty Acid Synthase	DNA Damage	(-)-Epigallocatechin Gallate(EGCG) is the main catechin extraction of green tea that inhibits telomerase and DNA methyltransferase. EGCG blocks the activation of EGF receptors and HER-2 receptors. ECGG inhibits fatty acid synthase and glutamate dehydrogenase activity.	458.37	989-51-5	72	157.078	23	50.1778	http://selleckchem.com/products/(-)-Epigallocatechin-gallate.html	C22H18O11	free base	EGCG	OC1=CC2=C(CC(OC(=O)C3=CC(=C(O)C(=C3)O)O)C(O2)C4=CC(=C(O)C(=C4)O)O)C(=C1)O	3.097	3	8	4
S2276	Bilobalide	e4	L2000-03	Others	Others	Bilobalide is a biologically active terpenic trilactone present in Ginkgo biloba.	326.3	33570-04-6	65	199.203	<1		http://selleckchem.com/products/Bilobalide.html	C15H18O8	free base	N/A	CC(C)(C)C1(O)CC2OC(=O)CC23C(=O)OC4OC(=O)C(O)C134	-0.641	6	1	1
S2286	Cyclosporin A	f4	L2000-03	Immunology & Inflammation related	Immunology & Inflammation	Cyclosporin A is an immunosuppressive agent, binds to the cyclophilin and then inhibits calcineurin with IC50 of 7 nM in a cell-free assay, widely used in organ transplantation to prevent rejection.	1202.61	59865-13-3	100	83.1525	<1		http://selleckchem.com/products/Cyclosporin-A(Cyclosporine-A).html	C62H111N11O12	free base	Cyclosporine A	CCC1NC(=O)C(C(O)C(C)C\C=C\C)N(C)C(=O)C(C(C)C)N(C)C(=O)C(CC(C)C)N(C)C(=O)C(CC(C)C)N(C)C(=O)C(C)NC(=O)C(C)NC(=O)C(CC(C)C)N(C)C(=O)C(NC(=O)C(CC(C)C)N(C)C(=O)CN(C)C1=O)C(C)C	4.333	11	5	15
S2303	gossypol-Acetic acid	g4	L2000-03	Dehydrogenase	Metabolism	Gossypol Acetate is a polyphenolic aldehyde that permeates cells and acts as an inhibitor for several dehydrogenase enzymes such as lactate dehydrogenase, NAD-linked enzymes.	578.61	12542-36-8	100	172.828	<1		http://selleckchem.com/products/Gossypol.html	C32H34O10	Acetate	Pogosin, AT101	CC(C)C1=C2C=C(C)C(=C(O)C2=C(C=O)C(=C1O)O)C3=C(O)C4=C(C=C3C)C(=C(O)C(=C4C=O)O)C(C)C.CC(O)=O	6.388	3	6	5
S2305	Grape Seed Extract	h4	L2000-03	Others	Others	Grape Seed Extract are industrial derivatives from whole grape seeds that have a great concentration of vitamin E, flavonoids, linoleic acid, and OPCs.	N/A	84929-27-1	94	10	<1		http://selleckchem.com/products/Grape-Seed-Extract.html		0	N/A		0	0	0	0
S2313	Indole-3-carbinol	a5	L2000-03	NF-κB	NF-κB	Indole-3-carbinol is produced by the breakdown of the glucosinolate glucobrassicin, which can be found at relatively high levels in cruciferous vegetables. Indole-3-carbinol suppresses NF-κB and IκBα kinase activation.	147.18	700-06-1	29	197.038	7	47.5608	http://selleckchem.com/products/Indole-3-carbinol.html	C9H9NO	free base	N/A	OCC1=C[NH]C2=C1C=CC=C2	1.518	0	2	1
S2323	Methyl-Hesperidin	b5	L2000-03	Others	Others	Methyl Hesperidin is a flavanone glycoside (flavonoid) (C28H34O15) found abundantly in citrus fruits. Its aglycone form is called hesperetin.	642.59	11013-97-1	100	155.62	100	155.62	http://selleckchem.com/products/Methyl-Hesperidin.html	C29H38O16	free base	N/A	COC1=CC=C(C=C1O)C2CC(=O)C3=C(OC)C=C(OC4OC(COC5OC(C)C(O)C(O)C5O)C(O)C(O)C4O)C=C3O2	-0.79	7	8	7
S2363	Tangeretin	c5	L2000-03	ROS	Immunology & Inflammation	Tangeretin, a natural polymethoxylated flavone concentrated in the peel of citrus fruits, is known to have antiproliferative, antiinvasive, antimetastatic and antioxidant activities.	372.37	481-53-8	8	21.484	<1		http://selleckchem.com/products/Tangeretin(Tangeritin).html	C20H20O7	free base	Tangeritin	COC1=CC=C(C=C1)C2=CC(=O)C3=C(OC)C(=C(OC)C(=C3O2)OC)OC	3.054	7	0	6
S2404	Isoliquiritigenin	d5	L2000-03	Others	Others	Isoliquiritigenin, an anti-tumor flavonoid from the root of Glycyrrhiza glabra, inhibits aldose reductase with an IC50 of 320 nM.	256.25	961-29-5	12	46.8293	<1		http://selleckchem.com/products/Isoliquiritigenin.html	C15H12O4	free base	N/A	OC1=CC=C(C=C1)\C=C\C(=O)C2=C(O)C=C(O)C=C2	2.975	1	3	3
S2448	Gambogic Acid	e5	L2000-03	Bcl-2,Caspase	Apoptosis	Gambogic Acid activates caspases with EC50 of 0.78-1.64 &muM and competitively inhibits Bcl-XL, Bcl-2, Bcl-W, Bcl-B, Bfl-1 and Mcl-1 with IC50 of 1.47, 1.21, 2.02, 0.66, 1.06 and 0.79 &muM, respectively.	628.75	2752-65-0	100	159.046	<1		http://selleckchem.com/products/gambogic-acid.html	C38H44O8	free base	Guttatic Acid, Guttic Acid	CC(C)=CCCC1(C)OC2=C(CC=C(C)C)C3=C(C(=C2C=C1)O)C(=O)C4=CC5CC6C(C)(C)OC(C\C=C(C)/C(O)=O)(C5=O)C46O3	6.957	6	1	8
S2449	Forskolin	f5	L2000-03	cAMP	GPCR & G Protein	Forskolin is a ubiquitous activator of eukaryotic adenylyl cyclase (AC) in a wide variety of cell types, commonly used to raise levels of cAMP in the study and research of cell physiology.	410.5	66575-29-9	82	199.756	<1		http://selleckchem.com/products/forskolin.html	C22H34O7	free base	Coleonol	CC(=O)OC1C(O)C2C(C)(C)CCC(O)C2(C)C3(O)C(=O)CC(C)(OC13C)C=C	0.837	4	2	3
S2617	TAK-733	g5	L2000-03	MEK	MAPK	TAK-733 is a potent and selective MEK allosteric site inhibitor for MEK1 with IC50 of 3.2 nM, inactive to Abl1, AKT3, c-RAF, CamK1, CDK2, c-Met, etc. Phase 1.	504.23	1035555-63-5	101	200.305	<1		http://selleckchem.com/products/tak-733.html	C17H15F2IN4O4	free base	N/A	CN1C(=O)C(=C(NC2=CC=C(I)C=C2F)C3=C1N=CN(CC(O)CO)C3=O)F	0.383	3	3	5
S2619	MG-132	h5	L2000-03	Proteasome	Proteases	MG132 is a potent cell-permeable proteasome and calpain inhibitor with IC50s of 0.1 and 1.2 μM for the inhibition of proteasome and calpain, respectively.	475.62	133407-82-6	90	189.227	<1		http://selleckchem.com/products/MG132.html	C26H41N3O5	free base	N/A	CC(C)CC(NC(=O)C(CC(C)C)NC(=O)C(CC(C)C)NC(=O)OCC1=CC=CC=C1)C=O	4.371	5	3	15
S2621	AZD5438	a6	L2000-03	CDK	Cell Cycle	AZD5438 is a potent inhibitor of CDK1/2/9 with IC50 of 16 nM/6 nM/20 nM in cell-free assays. It is less potent to CDK5/6 and also inhibits GSK3β. Phase 1.	371.46	602306-29-6	74	199.214	<1		http://selleckchem.com/products/AZD5438.html	C18H21N5O2S	free base	N/A	CC(C)[N]1C(=NC=C1C2=NC(=NC=C2)NC3=CC=C(C=C3)[S](C)(=O)=O)C	2.966	5	1	5
S2623	Omecamtiv mecarbil (CK-1827452)	b6	L2000-03	ATPase	Transmembrane Transporters	Omecamtiv mecarbil (CK-1827452) is a specific cardiac myosin activator and a clinical drug for left ventricular systolic heart failure. Phase 2.	401.43	873697-71-3	80	199.288	<1		http://selleckchem.com/products/Omecamtiv-mecarbil-CK-1827452.html	C20H24FN5O3	free base	N/A	COC(=O)N1CCN(CC1)CC2=CC=CC(=C2F)NC(=O)NC3=CN=C(C)C=C3	1.794	4	2	5
S2624	OSI-027	c6	L2000-03	mTOR	PI3K/Akt/mTOR	OSI-027 is a selective and potent dual inhibitor of mTORC1 and mTORC2 with IC50 of 22 nM and 65 nM in cell-free assays, and more than 100-fold selectivity observed for mTOR than PI3Kα, PI3Kβ, PI3Kγ or DNA-PK. Phase 1.	406.44	936890-98-1	18	44.287	<1		http://selleckchem.com/products/OSI027.html	C21H22N6O3	free base	ASP4786	COC1=CC=CC2=C1[NH]C(=C2)C3=C4[N](N=CN=C4N)C(=N3)C5CCC(CC5)C(O)=O	3.376	5	2	4
S2626	Rabusertib (LY2603618)	d6	L2000-03	Chk	Cell Cycle	Rabusertib (LY2603618) is a highly selective Chk1 inhibitor with potential anti-tumor activity in a cell-free assay. IC50=7 nM, showing approximately 100-fold more potent against Chk1 than against any of the other protein kinases evaluated.	436.3	911222-45-2	13	29.796	<1		http://selleckchem.com/products/LY2603618-IC-83.html	C18H22BrN5O3	free base	IC-83	CC1=NC=C(NC(=O)NC2=C(OCC3CNCCO3)C=C(C)C(=C2)Br)N=C1	1.58	5	3	5
S2629	PNU-120596	e6	L2000-03	AChR	Neuronal Signaling	PNU-120596 is a positive allosteric modulator of α7 nAChR with EC50 of 216 nM.	311.72	501925-31-1	62	198.896	<1		http://selleckchem.com/products/pnu120596.html	C13H14ClN3O4	free base	Nsc 216666	COC1=CC(=C(NC(=O)NC2=NOC(=C2)C)C=C1Cl)OC	2.293	5	2	4
S2630	GW3965 HCl	f6	L2000-03	Liver X Receptor	Others	GW3965 HCl is a potent, selective LXR agonist for hLXRα and hLXRβ with EC50 of 190 and 30 nM in cell-free assays, respectively.	618.51	405911-17-3	16	25.8686	<1		http://selleckchem.com/products/gw3965.html	C33H32Cl2F3NO3	hydrochloride	N/A	Cl.OC(=O)CC1=CC=CC(=C1)OCCCN(CC(C2=CC=CC=C2)C3=CC=CC=C3)CC4=CC=CC(=C4Cl)C(F)(F)F	5.473	2	0	14
S2631	URB597	g6	L2000-03	FAAH	Metabolism	URB597 is a potent, orally bioavailable FAAH inhibitor with IC50 of 4.6 nM, with no activity on other cannabinoid-related targets. Phase 1.	338.4	546141-08-6	68	200.946	<1		http://selleckchem.com/products/urb597.html	C20H22N2O3	free base	KDS-4103	NC(=O)C1=CC(=CC=C1)C2=CC=CC(=C2)OC(=O)NC3CCCCC3	3.972	3	2	5
S2632	BMS-378806	h6	L2000-03	gp120/CD4	Others	BMS-378806 selectively inhibits the binding of HIV-1 gp120 to the CD4 receptor with EC50 of 0.85-26.5 nM in virus.	406.43	357263-13-9	81	199.296	<1		http://selleckchem.com/products/bms806.html	C22H22N4O4	free base	BMS 806	COC1=C2C(=NC=C2C(=O)C(=O)N3CCN(CC3C)C(=O)C4=CC=CC=C4)[NH]C=C1	1.714	5	1	4
S2633	NPS-2143	a7	L2000-03	CaSR	GPCR & G Protein	NPS-2143 is a novel potent and selective antagonist of Ca(2+) receptor with IC50 of 43 nM.	408.92	284035-33-2	82	200.528	<1		http://selleckchem.com/products/nps-2143.html	C24H25ClN2O2	free base	SB262470	CC(C)(CC1=CC=C2C=CC=CC2=C1)NCC(O)COC3=C(C#N)C(=CC=C3)Cl	4.844	1	2	8
S2634	Rebastinib (DCC-2036)	b7	L2000-03	Bcr-Abl	Angiogenesis	Rebastinib (DCC-2036) is a conformational control Bcr-Abl inhibitor for Abl1(WT) and Abl1(T315I) with IC50 of 0.8 nM and 4 nM, also inhibits SRC, LYN, FGR, HCK, KDR, FLT3, and Tie-2, and low activity to seen towards c-Kit. Phase 1.	553.59	1020172-07-9	111	200.509	<1		http://selleckchem.com/products/dcc-2036.html	C30H28FN7O3	free base	N/A	CNC(=O)C1=NC=CC(=C1)OC2=CC(=C(NC(=O)NC3=CC(=N[N]3C4=CC5=C(C=C4)N=CC=C5)C(C)(C)C)C=C2)F	5.14	6	3	7
S2635	CCT128930	c7	L2000-03	Akt	PI3K/Akt/mTOR	CCT128930 is a potent, ATP-competitive and selective inhibitor of Akt2 with IC50 of 6 nM in a cell-free assay, 28-fold greater selectivity for Akt2 than the closely related PKA kinase.	341.84	885499-61-6	68	198.923	<1		http://selleckchem.com/products/cct128930.html	C18H20ClN5	free base	N/A	NC1(CCN(CC1)C2=C3C=C[NH]C3=NC=N2)CC4=CC=C(Cl)C=C4	2.813	2	2	3
S2637	Fasiglifam?(TAK-875)	d7	L2000-03	GPR	Endocrinology & Hormones	Fasiglifam?(TAK-875) is a selective GPR40 agonist with EC50 of 14 nM in human GPR40 expressing CHO cell line, 400-fold more potent than oleic acid.	533.63	1374598-80-7	100	187.396	<1		http://selleckchem.com/products/tak-875.html	C58H66O15S2	Hydrate	N/A	O.CC1=C(C(=CC(=C1)OCCC[S](C)(=O)=O)C)C2=CC=CC(=C2)COC3=CC=C4C(COC4=C3)CC(O)=O.CC5=C(C(=CC(=C5)OCCC[S](C)(=O)=O)C)C6=CC=CC(=C6)COC7=CC=C8C(COC8=C7)CC(O)=O	9.968	12	0	22
S2639	SNX-2112 (PF-04928473)	e7	L2000-03	HSP (e.g. HSP90)	Cytoskeletal Signaling	SNX-2112 (PF-04928473) selectively binds to the ATP pocket of HSP90α and HSP90β with Ka of 30 nM and 30 nM, uniformly more potent than 17-AAG.	464.48	908112-43-6	93	200.224	<1		http://selleckchem.com/products/snx-2112.html	C23H27F3N4O3	free base	N/A	CC1(C)CC(=O)C2=C(C1)[N](N=C2C(F)(F)F)C3=CC(=C(C=C3)C(N)=O)NC4CCC(O)CC4	3.709	3	3	5
S2656	PF-04929113 (SNX-5422)	f7	L2000-03	HSP (e.g. HSP90)	Cytoskeletal Signaling	PF-04929113 (SNX-5422) is a potent and selective HSP90 inhibitor with Kd of 41 nM and induces Her-2 degradation with IC50 of 37 nM. Phase 1/2.	521.53	908115-27-5	104	199.413	<1		http://selleckchem.com/products/pf-04929113.html	C25H30F3N5O4	free base	N/A	CC1(C)CC(=O)C2=C(C1)[N](N=C2C(F)(F)F)C3=CC=C(C(N)=O)C(=C3)NC4CCC(CC4)OC(=O)CN	3.126	5	3	8
S2658	Omipalisib (GSK2126458, GSK458)	g7	L2000-03	mTOR,PI3K	PI3K/Akt/mTOR	Omipalisib (GSK2126458, GSK458) is a highly selective and potent inhibitor of p110α/β/δ/γ, mTORC1/2 with Ki of 0.019 nM/0.13 nM/0.024 nM/0.06 nM and 0.18 nM/0.3 nM in cell-free assays, respectively. Phase 1.	505.5	1086062-66-9	100	197.824	<1		http://selleckchem.com/products/gsk2126458.html	C25H17F2N5O3S	free base	N/A	COC1=NC=C(C=C1N[S](=O)(=O)C2=CC=C(F)C=C2F)C3=CC=C4N=CC=C(C5=CC=NN=C5)C4=C3	3.705	7	1	6
S2659	5-hydroxymethyl Tolterodine (PNU 200577, 5-HMT, 5-HM)	h7	L2000-03	AChR	Neuronal Signaling	5-hydroxymethyl tolterodine (PNU 200577) is a new muscarinic receptor antagonist with Kb of 0.84 nM.	341.49	207679-81-0	68	199.127	<1		http://selleckchem.com/products/5-hydroxymethyl-tolterodine-pnu-200577.html	C22H31NO2	free base	Desfesoterodine	CC(C)N(CCC(C1=CC=CC=C1)C2=C(O)C=CC(=C2)CO)C(C)C	4.571	0	2	8
S2660	MK-0752	a8	L2000-03	Beta Amyloid,Gamma-secretase	Proteases	MK-0752 is a moderately potent γ-secretase inhibitor, which reduces Aβ40 production with IC50 of 5 nM. Phase 1/2.	442.9	471905-41-6	89	200.948	<1		http://selleckchem.com/products/mk-0752.html	C21H21ClF2O4S	free base	N/A	OC(=O)CCC1CCC(CC1)(C2=C(F)C=CC(=C2)F)[S](=O)(=O)C3=CC=C(Cl)C=C3	5.615	3	0	6
S2661	WYE-125132 (WYE-132)	b8	L2000-03	mTOR	PI3K/Akt/mTOR	WYE-125132 (WYE-132) is a highly potent, ATP-competitive mTOR inhibitor with IC50 of 0.19 nM highly selective for mTOR versus PI3Ks or PI3K-related kinases hSMG1 and ATR.	519.6	1144068-46-1	104	200.154	<1		http://selleckchem.com/products/wye-125132.html	C27H33N7O4	free base	N/A	CNC(=O)NC1=CC=C(C=C1)C2=NC3=C(C=N[N]3C4CCC5(CC4)OCCO5)C(=N2)N6CC7CCC(C6)O7	2.093	7	2	4
S2662	ICG-001	c8	L2000-03	Wnt/beta-catenin	Stem Cells & Wnt	ICG-001 antagonizes Wnt/β-catenin/TCF-mediated transcription and specifically binds to CREB-binding protein (CBP) with IC50 of 3 μM, but is not the related transcriptional coactivator p300.	548.63	780757-88-2	100	182.272	<1		http://selleckchem.com/products/icg-001.html	C33H32N4O4	free base	N/A	OC1=CC=C(CC2N3C(CN(CC4=CC=CC5=C4C=CC=C5)C2=O)N(CCC3=O)C(=O)NCC6=CC=CC=C6)C=C1	4.065	3	2	6
S2663	WAY-100635 Maleate	d8	L2000-03	5-HT Receptor	Neuronal Signaling	WAY-100635 Maleate is a potent and selective 5-HT receptor antagonist with IC50 of 0.95 nM.	538.64	1092679-51-0	85	157.805	<1		http://selleckchem.com/products/way-100635.html	C29H38N4O6	Maleate	N/A	COC1=C(C=CC=C1)N2CCN(CC2)CCN(C(=O)C3CCCCC3)C4=NC=CC=C4.OC(=O)\C=C/C(O)=O	1.427	5	0	9
S2672	PF-00562271 Besylate	e8	L2000-03	FAK	Angiogenesis	PF-00562271 is the benzenesulfonate salt of PF-562271, which is a potent, ATP-competitive, reversible inhibitor of FAK with IC50 of 1.5 nM, ~10-fold less potent for Pyk2 than FAK and >100-fold selectivity against other protein kinases, except for some CDKs. Phase 1.	665.66	939791-38-5	14	21.0318	<1		http://selleckchem.com/products/pf-00562271.html	C27H26F3N7O6S2	Benzenesulfonic	PF-562271 Besylate	CN(C1=C(CNC2=C(C=NC(=N2)NC3=CC=C4NC(=O)CC4=C3)C(F)(F)F)C=CC=N1)[S](C)(=O)=O.O[S](=O)(=O)C5=CC=CC=C5	3.653	6	3	9
S2679	Flavopiridol HCl	f8	L2000-03	CDK	Cell Cycle	Flavopiridol HCl competes with ATP to inhibit CDKs including CDK1, CDK2, CDK4 and CDK6 with IC50 of ~ 40 nM in cell-free assays. It is 7.5-fold more selective for CDK1/2/4/6 than CDK7. Flavopiridol is initially found to inhibit EGFR and PKA. Phase 1/2.	438.3	131740-09-5	88	200.776	<1		http://selleckchem.com/products/flavopiridol-hydrochloride.html	C21H21Cl2NO5	Hydrochloride	NSC 649890 HCl	Cl.CN1CCC(C(O)C1)C2=C3OC(=CC(=O)C3=C(O)C=C2O)C4=C(Cl)C=CC=C4	3.49	2	3	2
S2683	CHIR-124	g8	L2000-03	Chk	Cell Cycle	CHIR-124 is a novel and potent Chk1 inhibitor with IC50 of 0.3 nM in a cell-free assay. It shows 2,000-fold selectivity against Chk2, 500- to 5,000-fold less activity against CDK2/4 and Cdc2.	419.91	405168-58-3	7	16.6702	<1		http://selleckchem.com/products/chir-124.html	C23H22ClN5O	free base	N/A	ClC1=CC2=C(NC(=O)C(=C2NC3CN4CCC3CC4)C5=NC6=C([NH]5)C=CC=C6)C=C1	3.089	2	3	3
S2685	KW-2478	h8	L2000-03	HSP (e.g. HSP90)	Cytoskeletal Signaling	KW-2478 is a nonansamycin HSP90 inhibitor with IC50 of 3.8 nM. Phase 1.	574.66	819812-04-9	115	200.118	<1		http://selleckchem.com/products/kw-2478.html	C30H42N2O9	free base	N/A	CCC1=C(CC(=O)N(CCOC)CCOC)C(=C(O)C=C1O)C(=O)C2=CC=C(OCCN3CCOCC3)C(=C2)OC	2.673	7	2	16
S2687	Mardepodect (PF-2545920)	a9	L2000-03	PDE	Metabolism	PF-2545920 is a potent and selective PDE10A inhibitor with IC50 of 0.37 nM, with >1000-fold selectivity over the PDE.	392.45	1292799-56-4	78	198.751	<1		http://selleckchem.com/products/pf-2545920.html	C25H20N4O	free base	N/A	C[N]1C=C(C2=CC=NC=C2)C(=N1)C3=CC=C(OCC4=NC5=CC=CC=C5C=C4)C=C3	4.763	4	0	5
S2688	R547	b9	L2000-03	CDK	Cell Cycle	R547 is a potent ATP-competitive inhibitor of CDK1/2/4 with Ki of 2 nM/3 nM/1 nM. It is less potent to CDK7 and GSK3α/β, while inactive to other kinases. Phase 1.	441.45	741713-40-6	60	135.916	<1		http://selleckchem.com/products/r547.html	C18H21F2N5O4S	free base	Ro 4584820	COC1=CC=C(F)C(=C1C(=O)C2=C(N)N=C(NC3CCN(CC3)[S](C)(=O)=O)N=C2)F	1.133	6	2	6
S2690	ADX-47273	c9	L2000-03	GluR	Neuronal Signaling	ADX47273 is a potent and specific mGlu5 positive allosteric modulator(PAM) with EC50 of 0.17 μM, showing no activity at other mGlu subtypes.	369.36	851881-60-2	74	200.347	<1		http://selleckchem.com/products/adx-47273.html	C20H17F2N3O2	free base	BA 94673139	FC1=CC=C(C=C1)C(=O)N2CCCC(C2)C3=NC(=NO3)C4=CC=C(F)C=C4	3.577	4	0	3
S2691	BMY 7378 Dihydrochloride	d9	L2000-03	5-HT Receptor,Adrenergic Receptor	Neuronal Signaling	BMY 7378 is a multi-targeted inhibitor of α2C-adrenoceptor and α1D-adrenoceptor with pKi of 6.54 and 8.2, respectively, and acts as a mixed agonist and antagonist for 5-HT1A receptor with pKi of 8.3.	458.42	21102-95-4	92	200.689	92	200.689	http://selleckchem.com/products/bmy-7378.html	C22H33Cl2N3O3	Dihydrochloride	N/A	Cl.Cl.COC1=CC=CC=C1N2CCN(CC2)CCN3C(=O)CC4(CCCC4)CC3=O	3.384	3	0	5
S2692	TG101209	e9	L2000-03	c-RET,FLT3,JAK	JAK/STAT	TG101209 is a selective JAK2 inhibitor with IC50 of 6 nM, less potent to Flt3 and RET with IC50 of 25 nM and 17 nM in cell-free assays, ~30-fold selective for JAK2 than JAK3, sensitive to JAK2V617F and MPLW515L/K mutations.	509.67	936091-14-4	102	200.129	<1		http://selleckchem.com/products/tg101209.html	C26H35N7O2S	free base	N/A	CN1CCN(CC1)C2=CC=C(NC3=NC=C(C)C(=N3)NC4=CC(=CC=C4)[S](=O)(=O)NC(C)(C)C)C=C2	4.659	4	3	8
S2693	Resminostat	f9	L2000-03	HDAC	Epigenetics	Resminostat dose-dependently and selectively inhibits HDAC1/3/6 with IC50 of 42.5 nM/50.1 nM/71.8 nM, less potent to HDAC8 with IC50 of 877 nM.	349.4	864814-88-0	70	200.343	<1		http://selleckchem.com/products/resminostat-ras2410.html	C16H19N3O4S	free base	RAS2410	CN(C)CC1=CC=C(C=C1)[S](=O)(=O)[N]2C=CC(=C2)\C=C\C(=O)NO	1.837	3	1	6
S2694	Turofexorate Isopropyl (XL335)	g9	L2000-03	FXR	Others	Turofexorate Isopropyl (XL335) is a potent, selective FXR agonist with EC50 of 4 nM, highly selective versus other nuclear receptors, such as LXR, PPAR, ER and etc. Phase 1.	438.47	629664-81-9	33	75.2617	<1		http://selleckchem.com/products/way-362450.html	C25H24F2N2O3	free base	Fxr 450	CC(C)OC(=O)C1=CN(CC(C)(C)C2=C1[NH]C3=CC=CC=C23)C(=O)C4=CC=C(F)C(=C4)F	4.968	3	1	4
S2695	Nepicastat (SYN-117) HCl	h9	L2000-03	Hydroxylase	Metabolism	Nepicastat (SYN-117) HCl is a potent and selective inhibitor of both bovine and human dopamine-β-hydroxylase with IC50 of 8.5 nM and 9 nM, with negligible affinity for twelve other enzymes and thirteen neurotransmitter receptors. Phase 2.	331.81	170151-24-3	66	198.909	<1		http://selleckchem.com/products/nepicastat-hydrochloride.html	C14H16ClF2N3S	Hydrochloride	N/A	Cl.NCC1=CNC(=S)N1C2CCC3=C(F)C=C(F)C=C3C2	3.008	0	2	2
S2696	Apitolisib (GDC-0980, RG7422)	a10	L2000-03	mTOR,PI3K	PI3K/Akt/mTOR	Apitolisib (GDC-0980, RG7422) is a potent, class I PI3K inhibitor for PI3Kα/β/δ/γ with IC50 of 5 nM/27 nM/7 nM/14 nM in cell-free assays, respectively. Also a mTOR inhibitor with Ki of 17 nM in a cell-free assay, and highly selective versus other PIKK family kinases. Phase 2.	498.6	1032754-93-0	20	40.1123	<1		http://selleckchem.com/products/GDC-0980-RG7422.html	C23H30N8O3S	free base	GNE 390	CC(O)C(=O)N1CCN(CC1)CC2=C(C)C3=NC(=NC(=C3S2)N4CCOCC4)C5=CN=C(N)N=C5	1.013	6	2	5
S2698	RS-127445	b10	L2000-03	5-HT Receptor	Neuronal Signaling	RS-127445 is a selective 5-HT2B receptor antagonist with pKi of 9.5 and pIC50 of 10.4, exhibits >1000-fold selectivity against other 5-HT receptors.	281.33	199864-87-4	56	199.054	<1		http://selleckchem.com/products/rs-127445.html	C17H16FN3	free base	MT500	CC(C)C1=NC(=NC(=C1)C2=C3C=CC=CC3=C(F)C=C2)N	4.298	2	1	2
S2699	CH5132799	c10	L2000-03	PI3K	PI3K/Akt/mTOR	CH5132799 inhibits class I PI3Ks, particularly PI3Kα with IC50 of 14 nM less potent to PI3Kβδγ, while sensitive in PIK3CA mutations cell lines. Phase 1.	377.42	1007207-67-1	12	31.7948	<1		http://selleckchem.com/products/ch5132799.html	C15H19N7O3S	free base	N/A	C[S](=O)(=O)N1CCC2=C(N=C(N=C12)N3CCOCC3)C4=CN=C(N)N=C4	0.095	7	1	3
S2700	KX2-391	d10	L2000-03	Src	Angiogenesis	KX2-391, the first clinical Src inhibitor (peptidomimetic class) that targets the peptide substrate site of Src, with GI50 of 9-60 nM in cancer cell lines. Phase 2.	431.53	897016-82-9	86	199.291	<1		http://selleckchem.com/products/kx2-391.html	C26H29N3O3	free base	KX 01	O=C(CC1=CC=C(C=N1)C2=CC=C(OCCN3CCOCC3)C=C2)NCC4=CC=CC=C4	3.262	4	1	9
S2703	GSK1838705A	e10	L2000-03	ALK,IGF-1R	Protein Tyrosine Kinase	GSK1838705A is a potent IGF-1R inhibitor with IC50 of 2.0 nM, modestly potent to IR and ALK with IC50 of 1.6 nM and 0.5 nM, respectively, and little activity to other protein kinases.	532.57	1116235-97-2	107	200.913	<1		http://selleckchem.com/products/gsk1838705a.html	C27H29FN8O3	free base	N/A	CNC(=O)C1=C(F)C=CC=C1NC2=C3C=C[NH]C3=NC(=N2)NC4=C(OC)C=C5CCN(C(=O)CN(C)C)C5=C4	3.508	5	4	8
S2713	Geldanamycin	f10	L2000-03	HSP (e.g. HSP90),Autophagy	Cytoskeletal Signaling	Geldanamycin is a natural existing HSP90 inhibitor with Kd of 1.2 μM, specifically disrupts glucocorticoid receptor (GR)/HSP association.	560.64	30562-34-6	36	64.2123	<1		http://selleckchem.com/products/geldanamycin.html	C29H40N2O9	free base	NSC 122750	COC1CC(C)CC2=C(OC)C(=O)C=C(NC(=O)\C(=C\C=C\C(OC)C(OC(N)=O)\C(=C\C(C)C1O)C)C)C2=O	2.36	8	3	5
S2717	CP-91149	g10	L2000-03	Phosphorylase	Metabolism	CP-91149 is a selective glycogen phosphorylase (GP) inhibitor with IC50 of 0.13 μM in the presence of glucose, 5- to 10-fold less potent in the absence of glucose.	399.87	186392-40-5	80	200.065	<1		http://selleckchem.com/products/cp-91149.html	C21H22ClN3O3	free base	N/A	CN(C)C(=O)C(O)C(CC1=CC=CC=C1)NC(=O)C2=CC3=CC(=CC=C3[NH]2)Cl	3.082	2	3	6
S2718	TAK-901	h10	L2000-03	Aurora Kinase	Cell Cycle	TAK-901 is a novel inhibitor of Aurora A/B with IC50 of 21 nM/15 nM. It is not a potent inhibitor of cellular JAK2, c-Src or Abl. Phase 1.	504.64	934541-31-8	101	200.143	<1		http://selleckchem.com/products/tak-901.html	C28H32N4O3S	free base	N/A	CC[S](=O)(=O)C1=CC=CC(=C1)C2=CC(=C(C)C3=C2C4=C([NH]3)N=CC(=C4)C)C(=O)NC5CCN(C)CC5	4.056	4	2	5
S2719	AMG-900	a11	L2000-03	Aurora Kinase	Cell Cycle	AMG 900 is a potent and highly selective pan-Aurora kinases inhibitor for Aurora A/B/C with IC50 of 5 nM/4 nM /1 nM. It is >10-fold selective for Aurora kinases than p38α, Tyk2, JNK2, Met and Tie2. Phase 1.	503.58	945595-80-2	100	198.578	<1		http://selleckchem.com/products/amg-900.html	C28H21N7OS	free base	N/A	CC1=CSC(=C1)C2=NN=C(NC3=CC=C(OC4=C(C=CC=N4)C5=NC(=NC=C5)N)C=C3)C6=C2C=CC=C6	6.487	6	2	6
S2722	JTC-801	b11	L2000-03	Opioid Receptor	Neuronal Signaling	JTC-801 is a selective opioid receptor-like1 (ORL1) receptor antagonist with IC50 of 94 nM, weakly inhibits receptors δ, κ, and μ.	447.96	244218-51-7	90	200.911	<1		http://selleckchem.com/products/jtc-801.html	C26H26ClN3O2	Hydrochloride	N/A	Cl.CCC1=CC=C(OCC2=CC=CC=C2C(=O)NC3=CC4=C(C=C3)N=C(C)C=C4N)C=C1	5.228	3	2	6
S2726	PH-797804	c11	L2000-03	p38 MAPK	MAPK	PH-797804 is a novel pyridinone inhibitor of p38α with IC50 of 26 nM in a cell-free assay 4-fold more selective versus p38β and does not inhibit JNK2. Phase 2.	477.3	586379-66-0	96	201.131	<1		http://selleckchem.com/products/ph-797804.html	C22H19BrF2N2O3	free base	N/A	CNC(=O)C1=CC(=C(C)C=C1)N2C(=CC(=C(Br)C2=O)OCC3=CC=C(F)C=C3F)C	3.801	3	1	5
S2728	AG-1478 (Tyrphostin AG-1478)	d11	L2000-03	EGFR	Protein Tyrosine Kinase	AG-1478 (Tyrphostin AG-1478) is a selective EGFR inhibitor with IC50 of 3 nM in cell-free assays, almost no activity on HER2-Neu, PDGFR, Trk, Bcr-Abl and InsR.	315.75	153436-53-4	25	79.1766	<1		http://selleckchem.com/products/ag-1478-tyrphostin-ag-1478.html	C16H14ClN3O2	free base	NSC 693255	COC1=C(OC)C=C2C(=NC=NC2=C1)NC3=CC(=CC=C3)Cl	4.109	4	1	4
S2730	Crenolanib (CP-868596)	e11	L2000-03	PDGFR	Protein Tyrosine Kinase	Crenolanib (CP-868596) is a potent and selective inhibitor of PDGFRα/β with Kd of 2.1 nM/3.2 nM in CHO cells, also potently inhibits FLT3, sensitive to D842V mutation not V561D mutation, >100-fold more selective for PDGFR than c-Kit, VEGFR-2, TIE-2, FGFR-2, EGFR, erbB2, and Src.	443.54	670220-88-9	88	198.404	<1		http://selleckchem.com/products/crenolanib-cp-868596.html	C26H29N5O2	free base	ARO 002	CC1(COC1)COC2=CC3=C(C=C2)[N](C=N3)C4=NC5=C(C=CC=C5C=C4)N6CCC(N)CC6	3.192	4	1	5
S2738	PAC-1	f11	L2000-03	Caspase	Apoptosis	PAC-1 is a potent procaspase-3 activator with EC50 of 0.22 μM and the first small molecule known to directly activate procaspase-3 to caspase-3.	392.49	315183-21-2	78	198.731	<1		http://selleckchem.com/products/pac-1.html	C23H28N4O2	free base	N/A	OC1=C(CC=C)C=CC=C1/C=N/NC(=O)CN2CCN(CC2)CC3=CC=CC=C3	3.331	2	2	8
S2740	GSK1070916	g11	L2000-03	Aurora Kinase	Cell Cycle	GSK1070916 is a reversible and ATP-competitive inhibitor of Aurora B/C with IC50 of 3.5 nM/6.5 nM. It displays >100-fold selectivity against the closely related Aurora A-TPX2 complex. Phase 1.	507.63	942918-07-2	93	183.204	<1		http://selleckchem.com/products/gsk1070916.html	C30H33N7O	free base	N/A	CC[N]1C=C(C2=C3C=C([NH]C3=NC=C2)C4=CC=CC(=C4)CN(C)C)C(=N1)C5=CC=C(NC(=O)N(C)C)C=C5	4.841	3	2	7
S2742	PHA-767491	h11	L2000-03	CDK	Cell Cycle	PHA-767491 is a potent ATP-competitive dual Cdc7/CDK9 inhibitor with IC50 of 10 nM and 34 nM in cell-free assays, respectively.It displays ~20-fold selectivity against CDK1/2 and GSK3-β, 50-fold selectivity against MK2 and CDK5, 100-fold selectivity against PLK1 and CHK2.	249.7	942425-68-5	24	96.1153	<1		http://selleckchem.com/products/pha-767491.html	C12H11N3O.HCl	free base	CAY10572	O=C1NCCC2=C1C=C([NH]2)C3=CC=NC=C3	1.252	2	2	1
S2743	PF-04691502	a2	L2000-04	Akt,mTOR,PI3K	PI3K/Akt/mTOR	PF-04691502 is an ATP-competitive PI3K(α/β/δ/γ)/mTOR dual inhibitor with Ki of 1.8 nM/2.1 nM/1.6 nM/1.9 nM and 16 nM in cell-free assays, little activity against either Vps34, AKT, PDK1, p70S6K, MEK, ERK, p38, or JNK. Phase 2.	425.48	1013101-36-4	14	32.904	<1		http://selleckchem.com/products/pf-04691502.html	C22H27N5O4	free base	PF4691502	COC1=CC=C(C=N1)C2=CC3=C(C)N=C(N)N=C3N(C4CCC(CC4)OCCO)C2=O	1.616	6	2	6
S2747	AMG-458	b2	L2000-04	c-Met	Protein Tyrosine Kinase	AMG 458 is a potent c-Met inhibitor with Ki of 1.2 nM, ~350-fold selectivity for c-Met than VEGFR2 in cells.	539.58	913376-83-7	21	38.9192	<1		http://selleckchem.com/products/amg458.html	C30H29N5O5	free base	N/A	COC1=CC2=NC=CC(=C2C=C1)OC3=CN=C(NC(=O)C4=C(C)N(CC(C)(C)O)N(C4=O)C5=CC=CC=C5)C=C3	3.125	6	1	8
S2748	Anacetrapib (MK-0859)	c2	L2000-04	CETP,LDL	Metabolism	Anacetrapib (MK0859) is a potent, selective, reversible rhCETP and mutant CETP(C13S) inhibitor with IC50 of 7.9 nM and 11.8 nM, increases HDL-C and decreases LDL-C, does not increase aldosterone or blood pressure. Phase 3.	637.51	875446-37-0	127	199.213	<1		http://selleckchem.com/products/anacetrapib-mk-0859.html	C30H25F10NO3	free base	N/A	COC1=CC(=C(C=C1C2=CC=C(C=C2CN3C(C)C(OC3=O)C4=CC(=CC(=C4)C(F)(F)F)C(F)(F)F)C(F)(F)F)C(C)C)F	9.343	3	0	9
S2749	BGT226 (NVP-BGT226)	d2	L2000-04	mTOR,PI3K	PI3K/Akt/mTOR	BGT226 (NVP-BGT226) is a novel class I PI3K/mTOR inhibitor for PI3Kα/β/γ with IC50 of 4 nM/63 nM/38 nM. Phase 1/2.	650.6	1245537-68-1	30	46.1113	<1		http://selleckchem.com/products/nvp-bgt226.html	C32H29F3N6O6	Maleate	N/A	COC1=CC=C(C=N1)C2=CC=C3N=CC4=C(N(C(=O)N4C)C5=CC=C(N6CCNCC6)C(=C5)C(F)(F)F)C3=C2.OC(=O)\C=C/C(O)=O	1.618	6	1	7
S2751	Milciclib (PHA-848125)	e2	L2000-04	CDK	Cell Cycle	Milciclib (PHA-848125) is a potent, ATP-competitive CDK inhibitor for CDK2 with IC50 of 45 nM. It is >3-fold more selective for CDK2 than CDK1, 2, 4, 5, and 7. Phase 2.	460.57	802539-81-7	92	199.752	<1		http://selleckchem.com/products/pha-848125.html	C25H32N8O	free base	N/A	CNC(=O)C1=N[N](C)C2=C1C(C)(C)CC3=CN=C(NC4=CC=C(C=C4)N5CCN(C)CC5)N=C23	3.825	4	2	4
S2753	Tivantinib (ARQ 197)	f2	L2000-04	c-Met	Protein Tyrosine Kinase	Tivantinib (ARQ 197) is the first non-ATP-competitive c-Met inhibitor with Ki of 0.355 μM in a cell-free assay, little activity to Ron, and no inhibition to EGFR, InsR, PDGFRα or FGFR1/4. Phase 3.	369.42	905854-02-6	73	197.607	<1		http://selleckchem.com/products/arq-197.html	C23H19N3O2	free base	N/A	O=C1NC(=O)C(C1C2=C[NH]C3=C2C=CC=C3)C4=C[N]5CCCC6=CC=CC4=C56	3.52	2	2	2
S2754	AT406 (SM-406)	g2	L2000-04	E3 Ligase ,IAP	Apoptosis	AT406 (SM-406) is a potent Smac mimetic and an antagonist of IAP (inhibitor of apoptosis protein via E3 ubiquitin ligase), binding to XIAP-BIR3, cIAP1-BIR3 and cIAP2-BIR3 with Ki of 66.4 nM, 1.9 nM, and 5.1 nM, 50- to 100-fold higher affinities than the Smac AVPI peptide. Phase 1.	561.71	1071992-99-8	100	178.028	<1		http://selleckchem.com/products/at-406.html	C32H43N5O4	free base		CNC(C)C(=O)NC1CN(CCC2CCC(N2C1=O)C(=O)NC(C3=CC=CC=C3)C4=CC=CC=C4)C(=O)CC(C)C	2.264	4	3	9
S2755	Varlitinib	h2	L2000-04	EGFR	Protein Tyrosine Kinase	Varlitinib is a selective and potent ErbB1(EGFR) and ErbB2(HER2) inhibitor with IC50 of 7 nM and 2 nM, respectively. Phase 2.	466.94	845272-21-1	6	12.8496	<1		http://selleckchem.com/products/arry334543.html	C22H19ClN6O2S	free base	ARRY334543	CC1COC(=N1)NC2=CC3=C(C=C2)N=CN=C3NC4=CC(=C(OCC5=NC=CS5)C=C4)Cl	4.577	6	2	7
S2757	Evofosfamide (TH-302)	a3	L2000-04	Others	Others	TH-302 is selective hypoxia-activated prodrug targeting hypoxic regions of solid tumors with IC50 of 19 nM, demonstrates 270-fold enhanced cytotoxicity under hypoxia versus their potency under aerobic conditions, stable to cytochrome P450 metabolism.	449.04	918633-87-1	90	200.428	10	22.2697	http://selleckchem.com/products/th-302.html	C9H16Br2N5O4P	free base	Evofosfamide	C[N]1C(=CN=C1[N+]([O-])=O)CO[P](=O)(NCCBr)NCCBr	0.537	3	2	10
S2759	CUDC-907	b3	L2000-04	HDAC,PI3K	Cytoskeletal Signaling	CUDC-907 is a dual PI3K and HDAC inhibitor for PI3Kα and HDAC1/2/3/10 with IC50 of 19 nM and 1.7 nM/5 nM/1.8 nM/2.8 nM, respectively. Phase 1.	508.55	1339928-25-4	102	200.57	<1		http://selleckchem.com/products/pi3k-hdac-inhibitor-i.html	C23H24N8O4S	free base	N/A	COC1=CC=C(C=N1)C2=NC3=C(SC(=C3)CN(C)C4=NC=C(C=N4)C(=O)NO)C(=N2)N5CCOCC5	2.303	8	1	7
S2768	Dinaciclib (SCH727965)	c3	L2000-04	CDK	Cell Cycle	Dinaciclib (SCH727965) is a novel and potent CDK inhibitor for CDK2, CDK5, CDK1 and CDK9 with IC50 of 1 nM, 1 nM, 3 nM and 4 nM in cell-free assays, respectively. It also blocks thymidine (dThd) DNA incorporation. Phase 3.	396.49	779353-01-4	26	65.5754	<1		http://selleckchem.com/products/dinaciclib-sch727965.html	C21H28N6O2	free base	PS-095760	CCC1=C2N=C(C=C(NCC3=CC=C[N+](=C3)[O-])[N]2N=C1)N4CCCCC4CCO	2.152	2	2	7
S2769	Dovitinib (TKI-258) Dilactic Acid	d3	L2000-04	c-Kit,FGFR,FLT3,PDGFR,VEGFR	Angiogenesis	Dovitinib Dilactic acid (TKI258 Dilactic acid) is the Dilactic acid of Dovitinib, which is a multitargeted RTK inhibitor, mostly for class III (FLT3/c-Kit) with IC50 of 1 nM/2 nM, also potent to class IV (FGFR1/3) and class V (VEGFR1-4) RTKs with IC50 of 8-13 nM, less potent to InsR, EGFR, c-Met, EphA2, Tie2, IGFR1 and HER2. Phase 4.	572.59	852433-84-2	90	157.181	70	122.252	http://selleckchem.com/products/dovitinib.html	C27H33FN6O7	Dilactic Acid	N/A	CC(O)C(O)=O.CC(O)C(O)=O.CN1CCN(CC1)C2=CC=C3N=C([NH]C3=C2)C4=C(N)C5=C(NC4=O)C=CC=C5F	-2.038	4	5	4
S2770	MK-5108 (VX-689)	e3	L2000-04	Aurora Kinase	Cell Cycle	MK-5108 (VX-689) is a highly selective Aurora A inhibitor with IC50 of 0.064 nM in a cell-free assay and is 220- and 190-fold more selective for Aurora A than Aurora B/C, while it inhibits TrkA with less than 100-fold selectivity. Phase 1.	461.94	1010085-13-8	92	199.16	<1		http://selleckchem.com/products/mk-5108-vx-689.html	C22H21ClFN3O3S	free base	N/A	OC(=O)C1(CCC(CC1)OC2=C(F)C(=CC=C2)Cl)CC3=CC=CC(=N3)NC4=NC=CS4	5.574	4	1	7
S2772	Dalcetrapib (JTT-705, RO4607381)	f3	L2000-04	CETP	Metabolism	Dalcetrapib (JTT-705) is a rhCETP inhibitor with IC50 of 0.2 μM that increases the plasma HDL cholesterol. Phase 3.	389.59	211513-37-0	78	200.21	<1		http://selleckchem.com/products/dalcetrapib-jtt-705.html	C23H35NO2S	free base	N/A	CCC(CC)CC1(CCCCC1)C(=O)NC2=C(SC(=O)C(C)C)C=CC=C2	7.025	2	1	9
S2773	SB705498	g3	L2000-04	TRPV	Others	SB705498 is a TRPV1 antagonist for hTRPV1, antagonizes capsaicin, acid, and heat activation of TRPV1 with IC50 of 3 nM, 0.1 nM and 6 nM, shows a degree of voltage dependence, exhibits >100-fold selectivity for TRPV1 over TRPM8. Phase 2.	429.23	501951-42-4	86	200.359	<1		http://selleckchem.com/products/sb705498.html	C17H16BrF3N4O	free base	N/A	FC(F)(F)C1=CN=C(C=C1)N2CCC(C2)NC(=O)NC3=CC=CC=C3Br	3.745	2	2	4
S2774	MK-2461	h3	L2000-04	c-Met,FGFR,PDGFR	Protein Tyrosine Kinase	MK-2461 is a potent, multi-targeted inhibitor for c-Met(WT/mutants) with IC50 of 0.4-2.5 nM, less potent to Ron, Flt1 8- to 30-fold greater selectivity of c-Met targets versus FGFR1, FGFR2, FGFR3, PDGFRβ, KDR, Flt3, Flt4, TrkA, and TrkB. Phase 1/2. .	495.55	917879-39-1	99	199.778	<1		http://selleckchem.com/products/mk-2461.html	C24H25N5O5S	free base	N/A	CN(CC1COCCO1)[S](=O)(=O)NC2=CC3=C(C=C2)C=CC4=C(C=C(C=N4)C5=C[N](C)N=C5)C3=O	0.924	7	1	6
S2776	CPI-613	a4	L2000-04	Dehydrogenase	Metabolism	CPI-613, a lipoate analog, inhibits mitochondrial enzymes pyruvate dehydrogenase (PDH) and α-ketoglutarate dehydrogenase in NCI-H460 cell line, disrupts tumor cell mitochondrial metabolism. Phase 2.	388.59	95809-78-2	77	198.152	<1		http://selleckchem.com/products/cpi-613.html	C22H28O2S2	free base	N/A	OC(=O)CCCCC(CCSCC1=CC=CC=C1)SCC2=CC=CC=C2	5.63	1	0	13
S2778	GW842166X	b4	L2000-04	Cannabinoid Receptor	GPCR & G Protein	GW842166X is a potent and highly selective agonist of cannabinoid receptor CB2 receptor with EC50 of 63 nM, shows no significant activity at CB1 receptor. Phase 2.	449.25	666260-75-9	20	44.5186	<1		http://selleckchem.com/products/gw-842166x.html	C18H17Cl2F3N4O2	free base	N/A	FC(F)(F)C1=NC(=NC=C1C(=O)NCC2CCOCC2)NC3=CC=C(Cl)C=C3Cl	4.449	4	2	6
S2781	RITA (NSC 652287)	c4	L2000-04	E3 Ligase ,p53	Apoptosis	RITA (NSC 652287) induces both DNA-protein and DNA-DNA cross-links with no detectable DNA single-strand breaks, and also inhibits MDM2-p53 interaction by targeting p53.	292.37	213261-59-7	58	198.379	<1		http://selleckchem.com/products/rita-nsc-652287.html	C14H12O3S2	free base	N/A	OCC1=CC=C(S1)C2=CC=C(O2)C3=CC=C(CO)S3	3.407	1	2	4
S2783	Vistusertib (AZD2014)	d4	L2000-04	mTOR	PI3K/Akt/mTOR	Vistusertib (AZD2014) is a novel mTOR inhibitor with IC50 of 2.8 nM in a cell-free assay highly selective against multiple PI3K isoforms (α/β/γ/δ). AZD2014 showed no or weak binding to the majority of kinases when tested at 1 μM.	462.54	1009298-59-2	38	82.1551	<1		http://selleckchem.com/products/azd2014.html	C25H30N6O3	free base	N/A	CNC(=O)C1=CC=CC(=C1)C2=CC=C3C(=N2)N=C(N=C3N4CCOCC4C)N5CCOCC5C	3.103	6	1	4
S2784	TAK-285	e4	L2000-04	EGFR,HER2	Protein Tyrosine Kinase	TAK-285 is a novel dual HER2 and EGFR(HER1) inhibitor with IC50 of 17 nM and 23 nM, >10-fold selectivity for HER1/2 than HER4, less potent to MEK1/5, c-Met, Aurora B, Lck, CSK etc. Phase 1.	547.96	871026-44-7	110	200.745	<1		http://selleckchem.com/products/tak-285.html	C26H25ClF3N5O3	free base	N/A	CC(C)(O)CC(=O)NCC[N]1C=CC2=C1C(=NC=N2)NC3=CC=C(OC4=CC=CC(=C4)C(F)(F)F)C(=C3)Cl	5.586	4	2	10
S2785	A-803467	f4	L2000-04	Sodium Channel	Transmembrane Transporters	A-803467 is a selective NaV1.8 channel blocker with IC50 of 8 nM, blocks tetrodotoxin-resistant currents, exhibits >100-fold selectivity against human NaV1.2, NaV1.3, NaV1.5, and NaV1.7.	357.79	944261-79-4	72	201.235	<1		http://selleckchem.com/products/a-803467.html	C19H16ClNO4	free base	N/A	COC1=CC(=CC(=C1)NC(=O)C2=CC=C(O2)C3=CC=C(Cl)C=C3)OC	4.451	4	1	5
S2791	Sotrastaurin	g4	L2000-04	PKC	TGF-beta/Smad	Sotrastaurin is a potent and selective pan-PKC inhibitor, mostly for PKCθ with Ki of 0.22 nM in a cell-free assay inactive to PKCζ. Phase 2.	438.48	425637-18-9	87	198.413	<1		http://selleckchem.com/products/sotrastaurin-aeb071.html	C25H22N6O2	free base	AEB071	CN1CCN(CC1)C2=NC(=C3C=CC=CC3=N2)C4=C(C(=O)NC4=O)C5=C[NH]C6=C5C=CC=C6	3.483	4	2	3
S2796	WP1066	h4	L2000-04	JAK	JAK/STAT	WP1066 is a novel inhibitor of JAK2 and STAT3 with IC50 of 2.30 μM and 2.43 μM in HEL cells shows activity to JAK2, STAT3, STAT5, and ERK1/2 not JAK1 and JAK3. Phase 1.	356.22	857064-38-1	71	199.315	<1		http://selleckchem.com/products/wp1066.html	C17H14BrN3O	free base	N/A	CC(NC(=O)\C(=C\C1=NC(=CC=C1)Br)C#N)C2=CC=CC=C2	3.566	2	1	4
S2797	Lonafarnib	a5	L2000-04	Transferase	Metabolism	Lonafarnib is an orally bioavailable FPTase inhibitor for H-ras, K-ras-4B and N-ras with IC50 of 1.9 nM, 5.2 nM and 2.8 nM in cell-free assays, respectively. Phase 3.	638.82	193275-84-2	127	198.804	<1		http://selleckchem.com/products/lonafarnib-sch66336.html	C27H31Br2ClN4O2	free base	SCH66336	NC(=O)N1CCC(CC1)CC(=O)N2CCC(CC2)C3C4=C(CCC5=C3C(=CC(=C5)Cl)Br)C=C(Br)C=N4	5.271	3	1	3
S2801	AZD4547	b5	L2000-04	FGFR	Angiogenesis	AZD4547 is a novel selective FGFR inhibitor targeting FGFR1/2/3 with IC50 of 0.2 nM/2.5 nM/1.8 nM in cell-free assays, weaker activity against FGFR4, VEGFR2(KDR), and little activity observed against IGFR, CDK2, and p38. Phase 2/3.	463.57	1035270-39-3	92	198.46	<1		http://selleckchem.com/products/azd4547.html	C26H33N5O3	free base	N/A	COC1=CC(=CC(=C1)OC)CCC2=CC(=N[NH]2)NC(=O)C3=CC=C(C=C3)N4CC(C)NC(C)C4	4.204	4	3	8
S2803	Galeterone	c5	L2000-04	Androgen Receptor,P450 (e.g. CYP17)	Endocrinology & Hormones	Galeterone is a selective CYP17 inhibitor and androgen receptor (AR) antagonist with IC50 of 300 nM and 384 nM, respectively, and is a potent inhibitor of human prostate tumor growth. Phase 2.	388.55	851983-85-2	24	61.7681	<1		http://selleckchem.com/products/galeterone-tok-001.html	C26H32N2O	free base	TOK-001	CC12CCC(O)CC1=CCC3C2CCC4(C)C3CC=C4[N]5C=NC6=C5C=CC=C6	4.897	1	1	1
S2808	Ipatasertib (GDC-0068)	d5	L2000-04	Akt	PI3K/Akt/mTOR	Ipatasertib (GDC-0068) is a highly selective pan-Akt inhibitor targeting Akt1/2/3 with IC50 of 5 nM/18 nM/8 nM in cell-free assays, 620-fold selectivity over PKA. Phase 2.	458	1001264-89-6	92	200.873	<1		http://selleckchem.com/products/gdc-0068.html	C24H32ClN5O2	free base	RG7440	CC(C)NCC(C(=O)N1CCN(CC1)C2=C3C(C)CC(O)C3=NC=N2)C4=CC=C(Cl)C=C4	3.102	3	2	6
S2811	Sapanisertib (INK 128, MLN0128)	e5	L2000-04	mTOR	PI3K/Akt/mTOR	Sapanisertib (INK 128, MLN0128) is a potent and selective mTOR inhibitor with IC50 of 1 nM in cell-free assays >200-fold less potent to class I PI3K isoforms, superior in blocking mTORC1/2 and sensitive to pro-invasion genes (vs Rapamycin). Phase 1.	309.33	1224844-38-5	62	200.433	<1		http://selleckchem.com/products/ink128.html	C15H15N7O	free base	N/A	CC(C)[N]1N=C(C2=CC3=C(OC(=N3)N)C=C2)C4=C(N)N=CN=C14	1.886	5	2	2
S2812	AT101	f5	L2000-04	Bcl-2	Apoptosis	AT101, the R-(-) enantiomer of Gossypol acetic acid, binds with Bcl-2, Bcl-xL and Mcl-1 with Ki of 0.32 μM, 0.48 μM and 0.18 μM in cell-free assays does not inhibit BIR3 domain and BID. Phase 2.	578.61	866541-93-7	116	200.48	<1		http://selleckchem.com/products/at101.html	C32H34O10	free base	N/A	CC(C)C1=C(O)C(=C(C=O)C2=C1C=C(C)C(=C2O)C3=C(C)C=C4C(=C(O)C(=C(C=O)C4=C3O)O)C(C)C)O.CC(O)=O	6.388	3	6	5
S2813	Ciproxifan Maleate	g5	L2000-04	Histamine Receptor	Neuronal Signaling	Ciproxifan is a highly potent and selective histamin H3-receptor antagonist with IC50 of 9.2 nM, with low apparent affinity at other receptor subtypes.	386.4	184025-19-2	54	139.752	1	2.58799	http://selleckchem.com/products/ciproxifan.html	C20H22N2O6	Maleate	FUB 359	OC(=O)\C=C/C(O)=O.O=C(C1CC1)C2=CC=C(OCCCC3=C[NH]C=N3)C=C2	2.605	5	1	9
S2818	Tacedinaline (CI994)	h5	L2000-04	HDAC	Epigenetics	Tacedinaline (CI994) is a selective class I HDAC inhibitor with IC50 of 0.9, 0.9, 1.2, and >20 μM for human HDAC 1, 2, 3, and 8, respectively. Phase 3.	269.3	112522-64-2	54	200.52	<1		http://selleckchem.com/products/ci994-tacedinaline.html	C15H15N3O2	free base	PD-123654, GOE-5549, Acetyldinaline	CC(=O)NC1=CC=C(C=C1)C(=O)NC2=C(N)C=CC=C2	0.988	2	3	3
S2820	TAE226 (NVP-TAE226)	a6	L2000-04	FAK	Angiogenesis	TAE226 (NVP-TAE226) is a potent FAK inhibitor with IC50 of 5.5 nM and modestly potent to Pyk2, ~10- to 100-fold less potent against InsR, IGF-1R, ALK, and c-Met.	468.94	761437-28-9	94	200.452	<1		http://selleckchem.com/products/nvp-tae226.html	C23H25ClN6O3	free base	N/A	CNC(=O)C1=C(NC2=C(Cl)C=NC(=N2)NC3=C(OC)C=C(C=C3)N4CCOCC4)C=CC=C1	3.917	5	3	7
S2822	OC000459	b6	L2000-04	GPR	Endocrinology & Hormones	OC000459 is a potent and selective D prostanoid receptor 2 (DP2) antagonist with IC50 of 13 nM. Phase 2.	348.37	851723-84-7, 950688-14-9 (sodium salt)	4	11.482	<1		http://selleckchem.com/products/oc000459.html	C21H17FN2O2	free base	N/A	CC1=C(CC2=CC=C3C=CC=CC3=N2)C4=CC(=CC=C4[N]1CC(O)=O)F	4.329	2	0	4
S2823	Tideglusib	c6	L2000-04	GSK-3	PI3K/Akt/mTOR	Tideglusib is an irreversible, non ATP-competitive GSK-3β inhibitor with IC50 of 60 nM in a cell-free assay fails to inhibit kinases with a Cys homologous to Cys-199 located in the active site. Phase 2.	334.39	865854-05-3	8	23.9242	<1		http://selleckchem.com/products/tideglusib.html	C19H14N2O2S	free base	NP031112, NP-12	O=C1SN(C(=O)N1CC2=CC=CC=C2)C3=C4C=CC=CC4=CC=C3	4.63	2	0	3
S2828	JNJ-1661010	d6	L2000-04	FAAH	Metabolism	JNJ-1661010 is a potent and selective FAAH inhibitor with IC50 of 10 nM (rat) and 12 nM (human), exhibits >100-fold selectivity for FAAH-1 when compared to FAAH-2.	365.45	681136-29-8	36	98.5087	<1		http://selleckchem.com/products/jnj-1661010.html	C19H19N5OS	Free Base	Takeda-25	O=C(NC1=CC=CC=C1)N2CCN(CC2)C3=NC(=NS3)C4=CC=CC=C4	3.271	3	1	3
S2842	SAR131675	e6	L2000-04	VEGFR	Protein Tyrosine Kinase	SAR131675 is a VEGFR3 inhibitor with IC50/Ki of 23 nM/12 nM in cell-free assays, about 50- and 10-fold more selective for VEGFR3 than VEGFR1/2, little activity against Akt1, CDKs, PLK1, EGFR, IGF-1R, c-Met, Flt2 etc.	358.39	1433953-83-3	30	83.7077	<1		http://selleckchem.com/products/sar131675.html	C18H22N4O4	free base	N/A	CCN1C(=C(C(=O)NC)C(=O)C2=CC=C(N=C12)C#CC(C)(O)COC)N	0.769	4	2	6
S2845	Semaxanib (SU5416)	f6	L2000-04	VEGFR	Protein Tyrosine Kinase	Semaxanib (SU5416) is a potent and selective VEGFR(Flk-1/KDR) inhibitor with IC50 of 1.23 μM, 20-fold more selective for VEGFR than PDGFRβ, lack of activity against EGFR, InsR and FGFR. Phase 3.	238.28	194413-58-6	22	92.3284	<1		http://selleckchem.com/products/semaxanib-su5416.html	C15H14N2O	free base	N/A	CC1=CC(=C([NH]1)/C=C/2C(=O)NC3=CC=CC=C23)C	2.747	1	2	1
S2849	SB269970 HCl	g6	L2000-04	5-HT Receptor	Neuronal Signaling	SB269970 HCl is a hydrochloride salt form of SB-269970, which is a 5-HT7 receptor antagonist with pKi of 8.3, exhibits >50-fold selectivity against other receptors.	388.95	261901-57-9	11	28.2813	<1		http://selleckchem.com/products/sb-269970-hcl.html	C18H29ClN2O3S	Hydrochloride	N/A	Cl.CC1CCN(CC1)CCC2CCCN2[S](=O)(=O)C3=CC=CC(=C3)O	2.946	2	1	5
S2856	SB 271046 hydrochloride	h6	L2000-04	5-HT Receptor	Neuronal Signaling	SB 271046 hydrochloride is a potent, selective and orally active 5-HT6 receptor antagonist with pKi of 8.9, exhibits 200-fold greater selectivity over other 5-HT receptor subtypes.	488.45	209481-24-3	40	81.8917	<1		http://selleckchem.com/products/sb-271046.html	C20H23Cl2N3O3S2	hydrochloride	N/A	COC1=CC=C(N[S](=O)(=O)C2=C(C)C3=CC(=CC=C3S2)Cl)C=C1N4CCNCC4	4.403	3	2	5
S2857	(-)-MK 801 maleate	a7	L2000-04	NMDAR	Neuronal Signaling	(-)-MK-801 (Dizocilpine) is a potent N-methyl-D-aspartate (NMDA) receptor antagonist with Ki of 30.5 nM.	337.37	121917-57-5	67	198.595	<1		http://selleckchem.com/products/--mk-801-maleate.html	C16H15N.C4H4O4	maleate	C13737	CC12NC(CC3=C1C=CC=C3)C4=C2C=CC=C4.OC(=O)\C=C/C(O)=O	0.376	2	1	2
S2859	Golvatinib (E7050)	b7	L2000-04	c-Met,VEGFR	Protein Tyrosine Kinase	Golvatinib (E7050) is a dual c-Met and VEGFR-2 inhibitor with IC50 of 14 nM and 16 nM, does not inhibit bFGF-stimulated HUVEC growth (up to 1000 nM). Phase 1/2.	633.69	928037-13-2	20	31.5612	<1		http://selleckchem.com/products/golvatinib-e7050.html	C33H37F2N7O4	free base	N/A	CN1CCN(CC1)C2CCN(CC2)C(=O)NC3=NC=CC(=C3)OC4=CC(=C(NC(=O)C5(CC5)C(=O)NC6=CC=C(F)C=C6)C=C4)F	3.173	5	3	8
S2864	IMD 0354	c7	L2000-04	IκB/IKK	NF-κB	IMD-0354 is an IKKβ inhibitor and blocks IκBα phosphorylation in NF-κB pathway.	383.67	978-62-1	10	26.0641	<1		http://selleckchem.com/products/imd-0354.html	C15H8ClF6NO2	free base	N/A	OC1=C(C=C(Cl)C=C1)C(=O)NC2=CC(=CC(=C2)C(F)(F)F)C(F)(F)F	4.921	1	2	4
S2867	WHI-P154	d7	L2000-04	EGFR,JAK	JAK/STAT	WHI-P154 is a potent JAK3 inhibitor with IC50 of 1.8 μM, no activity against JAK1 or JAK2, also inhibits EGFR, Src, Abl, VEGFR and MAPK, prevents Stat3, but not Stat5 phosphorylation.	376.2	211555-04-3	75	199.362	<1		http://selleckchem.com/products/whi-p154.html	C16H14BrN3O3	free base	N/A	COC1=CC2=NC=NC(=C2C=C1OC)NC3=CC=C(O)C(=C3)Br	3.95	4	2	4
S2872	GW5074	e7	L2000-04	Raf	MAPK	GW5074 is a potent and selective c-Raf inhibitor with IC50 of 9 nM, no effect on the activities of JNK1/2/3, MEK1, MKK6/7, CDK1/2, c-Src, p38 MAP, VEGFR2 or c-Fms is noted.	520.94	220904-83-6	104	199.639	<1		http://selleckchem.com/products/gw5074.html	C15H8Br2INO2	free base	N/A	OC1=C(Br)C=C(C=C1Br)C=C2C(=O)NC3=CC=C(I)C=C23	4.564	1	2	1
S2876	(+)-MK 801 maleate	f7	L2000-04	NMDAR	Neuronal Signaling	(+)-MK-801 is a potent, selective and non-competitive NMDA receptor antagonist with Kd of 37.2 nM in rat brain membranes.	337.37	77086-22-7	68	201.559	<1		http://selleckchem.com/products/mk-801-maleate.html	C20H19NO4	maleate	N/A	CC12NC(CC3=C1C=CC=C3)C4=C2C=CC=C4.OC(=O)\C=C/C(O)=O	0.376	2	1	2
S2890	PF-562271	g7	L2000-04	FAK	Angiogenesis	PF-562271 is a potent, ATP-competitive, reversible inhibitor of FAK with IC50 of 1.5 nM in cell-free assays, ~10-fold less potent for Pyk2 than FAK and >100-fold selectivity against other protein kinases, except for some CDKs.	507.49	717907-75-0	100	197.048	<1		http://selleckchem.com/products/pf-562271.html	C21H20F3N7O3S	free base	N/A	CN(C1=C(CNC2=C(C=NC(=N2)NC3=CC=C4NC(=O)CC4=C3)C(F)(F)F)C=CC=N1)[S](C)(=O)=O	2.491	6	3	8
S2894	SB742457	h7	L2000-04	5-HT Receptor	Neuronal Signaling	SB742457 is a highly selective 5-HT6 receptor antagonist with pKi of 9.63, exhibits >100-fold selectivity over other receptors. Phase 2.	353.44	607742-69-8	78	220.688	<1		http://selleckchem.com/products/sb-742457.html	C19H19N3O2S	free base	GSK 742457	O=[S](=O)(C1=CC=CC=C1)C2=CC3=C(N=C2)C(=CC=C3)N4CCNCC4	2.702	3	1	3
S2904	PF-477736	a8	L2000-04	Chk	Cell Cycle	PF-477736 is a selective, potent and ATP-competitive Chk1 inhibitor with Ki of 0.49 nM in a cell-free assay and also inhibits VEGFR2, Aurora-A, FGFR3, Flt3, Fms (CSF1R), Ret and Yes. It shows ~100-fold selectivity for Chk1 than Chk2. Phase 1.	419.48	952021-60-2	6	14.3034	<1		http://selleckchem.com/products/pf-477736.html	C22H25N7O2	free base	PF-736,PF-00477736	C[N]1C=C(C=N1)C2=C3C=NNC(=O)C4=C3C(=CC(=C4)NC(=O)C(N)C5CCCCC5)[NH]2	2.089	4	4	4
S2905	JNJ-7777120	b8	L2000-04	Histamine Receptor	Neuronal Signaling	JNJ-7777120 is the first potent and selective non-imidazole histamine H4 receptor antagonist with Ki of 4.5 nM, exhibits >1000-fold selectivity over the other histamin receptors.	277.75	459168-41-3	56	201.62	<1		http://selleckchem.com/products/jnj-7777120.html	C14H16ClN3O	free base	N/A	CN1CCN(CC1)C(=O)C2=CC3=CC(=CC=C3[NH]2)Cl	2.45	1	1	1
S2906	Ki16198	c8	L2000-04	LPA Receptor	GPCR & G Protein	Ki16198 is the methyl ester of Ki16425, which is a LPA antagonist and inhibits LPA1- and LPA3-induced inositol phosphate production with Ki of 0.34 μM and 0.93 μM, respectively, shows weaker inhibition for LPA2, no activity at LPA4, LPA5, LPA6.	488.98	355025-13-7	96	196.327	<1		http://selleckchem.com/products/ki16198.html	C24H25ClN2O5S	free base	N/A	COC(=O)CCSCC1=CC=C(C=C1)C2=C(NC(=O)OC(C)C3=C(Cl)C=CC=C3)C(=NO2)C	5.269	6	1	11
S2910	Tempol	d8	L2000-04	Immunology & Inflammation related	Immunology & Inflammation	Tempol is a superoxide scavenger that displays neuroprotective, anti-inflammatory and analgesic effects. Phase 2.	172.24	2226-96-2	34	197.399	34	197.399	http://selleckchem.com/products/tempol-4-hydroxy-tempo.html	C9H18NO2 *	free base	4-Hydroxy-TEMPO	CC1(C)CC(O)CC(C)(C)N1[O]	0.413	0	1	0
S2914	Dapivirine (TMC120)	e8	L2000-04	Reverse Transcriptase	Microbiology	Dapivirine (TMC120) is a non-nucleoside inhibitor for HIV reverse transcriptase with IC50 of 24 nM, inhibits a broad panel of HIV-1 isolates from different classes, inclucing a wide range of NNRTI-resistant isolates. Phase 3.	329.4	244767-67-7	34	103.218	<1		http://selleckchem.com/products/dapivirine.html	C20H19N5	free base	N/A	CC1=CC(=C(NC2=CC=NC(=N2)NC3=CC=C(C=C3)C#N)C(=C1)C)C	5.549	2	2	4
S2918	HC-030031	f8	L2000-04	Calcium Channel	Transmembrane Transporters	HC-030031 is a selective TRPA1 channel blocker that antagonizes AITC- and formalin-evoked calcium influx with IC50 of 6.2 μM and 5.3 μM respectively.	355.39	349085-38-7	32	90.0419	<1		http://selleckchem.com/products/hc-030031.html	C18H21N5O3	free base	TOSLAB 829227	CC(C)C1=CC=C(NC(=O)C[N]2C=NC3=C2C(=O)N(C)C(=O)N3C)C=C1	1.73	4	1	4
S2924	CHIR-99021 (CT99021) HCl	g8	L2000-04	GSK-3	PI3K/Akt/mTOR	CHIR-99021 HCl (CT99021) is hydrochloride of CHIR-99021, which is a GSK-3α/β inhibitor with IC50 of 10 nM/6.7 nM CHIR-99021 shows greater than 500-fold selectivity for GSK-3 versus its closest homologs Cdc2 and ERK2.	501.8	1797989-42-4	93	185.333	<1		http://selleckchem.com/products/chir-99021-ct99021-hcl.html	C22H19Cl3N8	Hydrochloride	N/A	Cl.CC1=C[NH]C(=N1)C2=CN=C(NCCNC3=NC=C(C=C3)C#N)N=C2C4=CC=C(Cl)C=C4Cl	4.858	4	3	7
S2925	Evacetrapib (LY2484595)	h8	L2000-04	CETP	Metabolism	Evacetrapib (LY2484595) is a potent and selective inhibitor of CETP with IC50 of 5.5 nM, elevates HDL cholesterol without increases in aldosterone or blood pressure. Phase 3.	638.65	1186486-62-3	12.8	20.0423	<1		http://selleckchem.com/products/evacetrapib-ly2484595.html	C31H36F6N6O2	free base	N/A	C[N]1N=NC(=N1)N(CC2=CC(=CC(=C2)C(F)(F)F)C(F)(F)F)C3CCCN(CC4CCC(CC4)C(O)=O)C5=C3C=C(C)C=C5C	8.617	4	0	9
S2926	TDZD-8	a9	L2000-04	GSK-3	PI3K/Akt/mTOR	TDZD-8 is a non-ATP competitive GSK-3β inhibitor with IC50 of 2 μM minimal inhibitory effect observed on CDK1, casein kinase II, PKA and PKC.	222.26	327036-89-5	44.5	200.216	<1		http://selleckchem.com/products/tdzd-8.html	C10H10N2O2S	free base	NP 01139	CN1SC(=O)N(CC2=CC=CC=C2)C1=O	2.145	2	0	2
S2928	TAK-715	b9	L2000-04	p38 MAPK	MAPK	TAK-715 is a p38 MAPK inhibitor for p38α with IC50 of 7.1 nM, 28-fold more selective for p38α over p38β, no inhibition to p38γ/δ, JNK1, ERK1, IKKβ, MEKK1 or TAK1. Phase 2.	399.51	303162-79-0	80	200.245	<1		http://selleckchem.com/products/tak-715.html	C24H21N3OS	free base	N/A	CCC1=NC(=C(S1)C2=CC(=NC=C2)NC(=O)C3=CC=CC=C3)C4=CC=CC(=C4)C	5.629	3	1	5
S3032	Bindarit	c9	L2000-04	Immunology & Inflammation related	Immunology & Inflammation	Bindarit exhibits selective inhibition against monocyte chemotactic proteins MCP-1/CCL2, MCP-3/CCL7 and MCP-2/CCL8.	324.37	130641-38-2	64	197.306	<1		http://selleckchem.com/products/bindarit.html	C19H20N2O3	free base	AF 2838	CC(C)(OCC1=N[N](CC2=CC=CC=C2)C3=C1C=CC=C3)C(O)=O	3.559	3	0	6
S3600	Schisandrin B (Sch B)	d9	L2000-04	ATM/ATR,P-gp	PI3K/Akt/mTOR	Schisandrin B is the most abundant dibenzocyclooctadiene lignan present in the traditional Chinese medicinal herb Schisandra chinensis (Turcz.) Baill. It is a kind of ATR and P-gp inhibitor with high safety.	400.46	61281-37-6	80	199.77	<1		http://selleckchem.com/products/schisandrin-b.html	C23H28O6	free base	N/A	COC1=CC2=C(C(=C1OC)OC)C3=C(CC(C)C(C)C2)C=C4OCOC4=C3OC	5.067	6	0	4
S3603	Betulinic acid	e9	L2000-04	Topoisomerase	DNA Damage	Betulinic acid, a pentacyclic triterpenoid from Syzigium claviflorum, is a inhibitor of HIV-1 with EC50 of 1.4 &mu M. Phase 1/2.	456.7	472-15-1	20	43.7924	<1		http://selleckchem.com/products/betulinic-acid.html	C30H48O3	free base	ALS-357	CC(=C)C1CCC2(CCC3(C)C(CCC4C5(C)CCC(O)C(C)(C)C5CCC34C)C12)C(O)=O	6.546	1	1	2
S3608	Demethylzeylasteral (T-96)	f9	L2000-04	Immunology & Inflammation related	Immunology & Inflammation	Demethylzeylasteral (T-96), the active component isolated from Tripterygium wilfordii Hook F., inhibits UDP-glucuronosyltransferase (UGT) isoforms UGT1A6 and UGT2B7 with immunosuppressive effects.	480.59	107316-88-1	96	199.754	<1		http://selleckchem.com/products/demethylzeylasteral-t-96.html	C29H36O6	free base	N/A	CC12CCC(C)(CC1C3(C)CCC4(C)C5=CC(=C(O)C(=C5C(=O)C=C4C3(C)CC2)C=O)O)C(O)=O	5.357	3	2	2
S3610	Cordycepin	g9	L2000-04	Others	Others	Cordycepin is an adenosine analogue, which is readily phosphorylated to its mono-, di-, and triphosphate intracellularly. It has a very potent anti-cancer, anti-oxidant and anti-inflammatory activities.	251.24	73-03-0	50	199.013	25	99.5064	http://selleckchem.com/products/cordycepin.html	C10H13N5O3	free base	N/A	NC1=NC=NC2=C1N=C[N]2C3OC(CO)CC3O	-1.308	4	3	2
S3653	Spermidine trihydrochloride	h9	L2000-04	NMDAR,Autophagy	Neuronal Signaling	Spermidine, a natural polyamine produced from putrescine and decarboxylated S-adenosylmethionine (dcSAM) by spermidine synthase, is a novel autophagy inducer and negatively modulates N-methyl-d-aspartate (NMDA).	254.63	334-50-9	30	117.818	50	196.363	http://selleckchem.com/products/spermidine-trihydrochloride.html	C7H22Cl3N3	trihydrochloride	4-Azaoctamethylenediamine trihydrochloride	Cl.Cl.Cl.NCCCCNCCCN	-0.024	0	3	7
S3658	O6-Benzylguanine	a10	L2000-04	Transferase	Metabolism	O6-Benzylguanine (O6-BG) is a potent O6-alkylguanine DNA alkyltransferase (AGT) inactivator.	241.25	19916-73-5	48	198.964	<1		http://selleckchem.com/products/o6-benzylguanine.html	C12H11N5O	free base	O6-BG	NC1=NC2=C(N=C[NH]2)C(=N1)OCC3=CC=CC=C3	1.646	4	2	3
S3676	Carbendazim	b10	L2000-04	Anti-infection	Microbiology	Carbendazim is a broad-spectrum systemic antimycotic and can be used to control a broad range of diseases on field crops, fruits, and vegetables, including sclerotinia rot of canola, wheat head blight, peanut leaf spot, and SB on rice. Its mode of action is to inhibit the formation of mitotic microtubules in of fungi.	191.19	10605-21-7	17	88.9168	<1		http://selleckchem.com/products/carbendazim.html	C9H9N3O2	free base	Mercarzole, Carbendazole	COC(=O)NC1=NC2=C([NH]1)C=CC=C2	1.65	3	2	2
S3720	Elafibranor	c10	L2000-04	PPAR	Metabolism	Elafibranor is an agonist of the peroxisome proliferator-activated receptor-α(PPAR-alpha) and peroxisome proliferator-activated receptor-δ(PPAR-δ). It improves insulin sensitivity, glucose homeostasis, and lipid metabolism and reduces inflammation.	384.49	923978-27-2	76	197.664	<1		http://selleckchem.com/products/elafibranor.html	C22H24O4S	free base	GFT505	CSC1=CC=C(C=C1)C(=O)\C=C\C2=CC(=C(OC(C)(C)C(O)=O)C(=C2)C)C	5.477	3	0	7
S3759	Norcantharidin	d10	L2000-04	EGFR,c-Met	Protein Tyrosine Kinase	Norcantharidin is a synthetic anticancer compound which is a dual inhibitor for c-Met and EGFR in human colon cancers.	168.15	29745-04-8	33	196.253			http://selleckchem.com/products/norcantharidin.html	C8H8O4	free base	Endothall anhydride	O=C1OC(=O)C2C3CCC(O3)C12	-0.117	4	0	0
S3765	Picroside II	e10	L2000-04	Immunology & Inflammation related	Immunology & Inflammation	Picroside II is the main active ingredient in iridoid glycosides, which is the principal component of <i>Picrorrhiza kurroa Royle</i>. It has antioxidant, anti-inflammatory, immune regulatory, anti-virus and other pharmacological activities.	512.46	39012-20-9	100	195.137			http://selleckchem.com/products/picroside-ii.html	C23H28O13	free base	6-Vanilloylcatalpol, Vanilloyl catalpol	COC1=CC(=CC=C1O)C(=O)OC2C3C=COC(OC4OC(CO)C(O)C(O)C4O)C3C5(CO)OC25	-1.796	7	6	8
S3777	Gentiopicroside	f10	L2000-04	P450 (e.g. CYP17)	Metabolism	Gentiopicroside (GE), a naturally occurring iridoid glycoside, inhibits CYP2A6 and CYP2E1 with IC50 values of 21.8μg/ml and 594μg/ml, respectively in human liver microsomes, and dose not inhibit CYP2C9, CYP2D6, CYP1A2 or CYP3A4 activities.	356.32	20831-76-9	71	199.259			http://selleckchem.com/products/gentiopicroside.html	C16H20O9	free base	Gentiopicrin	OCC1OC(OC2OC=C3C(=O)OCC=C3C2C=C)C(O)C(O)C1O	-1.523	5	4	4
S3780	Secoisolariciresinol diglucoside	g10	L2000-04	Others	Others	Secoisolariciresinol diglucoside (SDG), a plant lignan isolated from flaxseed, has strong antioxidant activity, cardioprotective effects, reduces the blood levels of low-density lipoprotein cholesterol, and reduces the risk of hormone related cancer.	686.7	148244-82-0	100	145.624	100	145.624	http://selleckchem.com/products/secoisolariciresinol-diglucoside.html	C32H46O16	free base	N/A	COC1=C(O)C=CC(=C1)CC(COC2OC(CO)C(O)C(O)C2O)C(COC3OC(CO)C(O)C(O)C3O)CC4=CC(=C(O)C=C4)OC	-0.651	6	10	15
S3787	Picroside I	h10	L2000-04	Anti-infection	Microbiology	Picroside I, an iridoid glycoside, is a hepatoprotective agent which is reported to be antimicrobial and used against hepatitis B.	492.47	27409-30-9	98	198.997			http://selleckchem.com/products/picroside-i.html	C24H28O11	free base	6'-Cinnamoylcatalpol	OCC12OC1C(O)C3C=COC(OC4OC(COC(=O)\C=C\C5=CC=CC=C5)C(O)C(O)C4O)C23	-1.07	6	5	8
S3797	Helicide	a11	L2000-04	Others	Others	Helicide (4-formylphenyl-O-β-d-allopyranoside), a main active constituent from seeds of the Chinese herb Helicia nilagirica, has been reported to exert a sedative, analgesic and hypnotic effect, and is used clinically to treat neurasthenic syndrome, vascular headaches and trigeminal neuralgia.	284.26	80154-34-3	56	197.003			http://selleckchem.com/products/helicide.html	C13H16O7	free base	4-formylphenyl-O-β-d-allopyranoside	OCC1OC(OC2=CC=C(C=O)C=C2)C(O)C(O)C1O	-0.583	3	4	4
S3804	Alpha-Mangostin	b11	L2000-04	Others	Others	Alpha-mangostin is the main xanthone purified from mangosteen and has health promoting benefits including anti-bacterial, anti-inflammatory, anti-oxidant, anti-cancer and cardioprotective activities.	410.46	6147-11-1	82	199.776			http://selleckchem.com/products/alpha-mangostin.html	C24H26O6	free base	N/A	COC1=C(O)C=C2OC3=C(C(=C(CC=C(C)C)C(=C3)O)O)C(=O)C2=C1CC=C(C)C	5.935	3	3	5
S3834	Astaxanthin	c11	L2000-04	Others	Others	Astaxanthin, a xanthophyll carotenoid, is a nutrient with unique cell membrane actions and diverse clinical benefits with excellent safety and tolerability.	596.84	472-61-7	100	167.549			http://selleckchem.com/products/astaxanthin.html	C40H52O4	free base	β-Carotene-4,4'-dione, trans-Astaxanthin	CC(=C\C=C\C=C(C)\C=C\C=C(C)\C=C\C1=C(C)C(=O)C(O)CC1(C)C)/C=C/C=C(C)/C=C/C2=C(C)C(=O)C(O)CC2(C)C	8.421	2	2	10
S3839	1-Deoxynojirimycin	d11	L2000-04	Others	Others	1-Deoxynojirimycin is a potent α-glucosidase inhibitor and most commonly found in mulberry leaves. It has therapeutic potency against diabetes mellitus.	163.17	19130-96-2	16	98.0572			http://selleckchem.com/products/1-deoxynojirimycin.html	C6H13NO4	free base	duvoglustat, moranolin	OCC1NCC(O)C(O)C1O	-2.44	0	5	1
S3846	Eupatilin	e11	L2000-04	Others	Others	Eupatilin, a major flavonoid from Artemisia plants, possesses various beneficial biological effects including anti-inflammation, anti-tumor, anti-cancer, anti-allergy, and anti-oxidation activity.	344.32	22368-21-4	68	197.491			http://selleckchem.com/products/eupatilin.html	C18H16O7	free base	NSC 122413	COC1=CC=C(C=C1OC)C2=CC(=O)C3=C(O2)C=C(O)C(=C3O)OC	2.603	5	2	4
S3853	Perillyl alcohol	f11	L2000-04	Others	Others	Perillyl alcohol is a monoterpene isolated from the essential oils of lavendin, peppermint, spearmint, cherries, celery seeds, and several other plants.	152.23	536-59-4	The physical form of the compound is liquid, which can be dissolved in any proportion.				http://selleckchem.com/products/perillyl-alcohol.html	C10H16O	free base	Perilla alcohol, Isocarveol	CC(=C)C1CCC(=CC1)CO	2.411	0	1	2
S3890	Leonurine	g11	L2000-04	Others	Others	Leonurine, an active alkaloid extracted from Traditional Chinese Medicine Herba leonuri, exerts several biological effects, such as antidiabetic, cardiovascular, and bovine mastitis protection.	311.33	24697-74-3	62	199.146			http://selleckchem.com/products/leonurine.html	C14H21N3O5	free base	N/A	COC1=C(O)C(=CC(=C1)C(=O)OCCCCNC(N)=N)OC	1.09	4	3	10
S3897	(-)-Arctigenin	h11	L2000-04	Others	Others	(-)-Arctigenin, a lignan found in certain plants of the Asteraceae, exerts biological activities including anti-inflammatory, antiviral and anticancer.	372.41	7770-78-7	74	198.706			http://selleckchem.com/products/neg-rotation-arctigenin.html	C21H24O6	free base	N/A	COC1=C(O)C=CC(=C1)CC2C(COC2=O)CC3=CC=C(OC)C(=C3)OC	3.743	5	1	7
S3905	Iso-Steviol	a2	L2000-05	Others	Others	Isosteviol (ISV) is mainly obtained by acid hydrolysis of stevioside, the sweet food additive extracted from the plant <i>Stevia Rebaudiana Bertoni</i> (Bertoni). It possesses various biological activities including anti-hyperglycemic, anti-hypertensive, anti-tumor, anti-inflammatory, and antioxidant effects.	318.45	27975-19-5	63	197.833			http://selleckchem.com/products/iso-steviol.html	C20H30O3	free base	N/A	CC12CCC3C4(C)CCCC(C)(C4CCC3(CC1=O)C2)C(O)=O	3.924	2	0	1
S3931	Ginsenoside Rd	b2	L2000-05	Others	Others	Ginsenoside Rd, a minor ginseng saponin, has several pharmacological activities such as immunosuppressive activity, anti-inflammatory activity, immunological adjuvant, anti-cancer activity and wound-healing activity.	947.15	52705-93-8	90	95.0219			http://selleckchem.com/products/ginsenoside-rd.html	C48H82O18	free base	Panaxoside Rd, Sanchinoside Rd	CC(C)=CCCC(C)(OC1OC(CO)C(O)C(O)C1O)C2CCC3(C)C2C(O)CC4C5(C)CCC(OC6OC(CO)C(O)C(O)C6OC7OC(CO)C(O)C(O)C7O)C(C)(C)C5CCC34C	0.548	6	12	13
S3934	Acetyl Resveratrol	c2	L2000-05	Sirt12	others	Acetyl Resveratrol is a stilbenoid, a type of phenol with antioxidant and potential chemopreventive activities	354.35	42206-94-0	70	197.545	<1		http://selleckchem.com/products/.html	C20H18O6	free base	N/A	CC(=O)OC1=CC=C(C=C1)/C=C/C2=CC(=CC(=C2)OC(C)=O)OC(C)=O	3.119	6	0	8
S3937	Pterostilbene	d2	L2000-05	autophagy	autophagy	Pterostilbene is extracted from Pterocarpus indicus.	256.3	537-42-8	51	198.986	<1		http://selleckchem.com/products/.html	C16H16O3	free base	N/A	COC1=CC(=CC(=C1)\C=C\C2=CC=C(O)C=C2)OC	3.541	2	1	4
S3941	Pinocembrin	e2	L2000-05	Anti-infection	Microbiology	Pinocembrin is a major flavonoid molecule incorporated as multifunctional in the pharmaceutical industry. Its vast range of pharmacological activities has been well researched including antimicrobial, anti-inflammatory, antioxidant, and anticancer activities.	256.25	480-39-7	51	199.024	<1		http://selleckchem.com/products/pinocembrin.html	C15H12O4	free base	Dihydrochrysin; Galangin flavanone; 5,7-Dihydroxyflavanone	OC1=CC2=C(C(=O)CC(O2)C3=CC=CC=C3)C(=C1)O	2.615	2	2	1
S4116	Isovaleramide	f2	L2000-05	Dehydrogenase	Metabolism	Isovaleramide is an anticonvulsant molecule isolated from Valeriana pavonii, it inhibits the liver alcohol dehydrogenases.	101.15	541-46-8	20	197.726	<1		http://selleckchem.com/products/isovaleramide.html	C5H11NO	free base	N/A	CC(C)CC(N)=O	0.542	1	1	2
S4212	Tenatoprazole	g2	L2000-05	Proton Pump	Transmembrane Transporters	Tenatoprazole is a prodrug of the proton pump inhibitor (PPI) class, which inhibits proton transport with IC50 of 3.2 μM.	346.4	113712-98-4	46	132.794	<1		http://selleckchem.com/products/tenatoprazole.html	C16H18N4O3S	free base	TU-199	COC1=CC=C2[NH]C(=NC2=N1)[S](=O)CC3=C(C)C(=C(C)C=N3)OC	2.488	6	1	5
S4261	EUK 134	h2	L2000-05	Beta Amyloid	Neuronal Signaling	EUK 134, a synthetic superoxide dismutase (SOD)/catalase mimetic, exhibits potent antioxidant activities, and inhibits the formation of β-amyloid and related amyloid fibril.	416.74	81065-76-1	83	199.165	13	31.1945	http://selleckchem.com/products/euk-134.html	C18H18ClMnN2O4	Complex	N/A	COC1=C2O[Mn]|3|4(Cl)OC5=C(OC)C=CC=C5C=N|3CCN|4=CC2=CC=C1	3.526	4	0	2
S4521	DEET	a3	L2000-05	Anti-infection	Microbiology	DEET is a commen active ingredient insect repellent.	191.27	134-62-3	The physical form of the compound is liquid, which can be dissolved in any proportion.				http://selleckchem.com/products/deet.html	C12H17NO	free base	N,N-Diethyl-meta-toluamide, diethyltoluamide	CCN(CC)C(=O)C1=CC(=CC=C1)C	2.427	1	0	3
S4708	Palmitoylethanolamide	b3	L2000-05	PPAR	Metabolism	Palmitoylethanolamide(PEA) is an endogenous fatty acid amide and selectively activates PPAR-α in vitro with an EC50 value of 3.1±0.4 μM.	299.49	544-31-0	59	197.002	<1		http://selleckchem.com/products/palmitoylethanolamide.html	C18H37NO2	free base	Palmidrol|N-palmitoylethanolamine	CCCCCCCCCCCCCCCC(=O)NCCO	5.431	1	2	16
S4715	Benzamide	c3	L2000-05	PARP	DNA Damage	Benzamide, a derivative of benzoic acid, is an inhibitor of poly(ADP-ribose) polymerase with an IC50 of 3.3 μM.	121.14	55-21-0	24	198.118	<1		http://selleckchem.com/products/benzamide.html	C7H7NO	free base		NC(=O)C1=CC=CC=C1	0.832	1	1	1
S4719	Kynurenic acid	d3	L2000-05	NMDAR	Neuronal Signaling	Kynurenic acid, a natural metabolite of tryptophan via the kynurenine pathway, is a broad-spectrum excitatory amino acid antagonist It proved to be an antagonist at NMDA, kainate and AMPA receptors.	189.17	492-27-3	10	52.8625	<1		http://selleckchem.com/products/kynurenic-acid.html	C10H7NO3	free base	Quinurenic acid|Kynurenate	OC(=O)C1=CC(=C2C=CC=CC2=N1)O	1.832	2	1	1
S4728	3,3'-Diindolylmethane	e3	L2000-05	Others	Others	3,3'-Diindolylmethane(DIM) is a major digestive product of indole-3-carbinol, a potential anticancer component of cruciferous vegetables.	246.31	1968-05-4	49	198.936	<1		http://selleckchem.com/products/3-3-diindolylmethane.html	C17H14N2	free base	DIM	C(C1=C[NH]C2=C1C=CC=C2)C3=C[NH]C4=C3C=CC=C4	4.391	0	2	2
S4743	Wogonin	f3	L2000-05	CDK,Transferase	Cell Cycle	Wogonin, a natural and biologically-active flavonoid found in plants, is an inhibitor of CDK9 and does not inhibit CDK2, CDK4 and CDK6 at doses that inhibit CDK9 activity Also inhibits N-acetyltransferase.	284.26	632-85-9	56	197.003	<1		http://selleckchem.com/products/wogonin.html	C16H12O5	free base	Vogonin	COC1=C(O)C=C(O)C2=C1OC(=CC2=O)C3=CC=CC=C3	2.636	3	2	2
S4777	Plumbagin	g3	L2000-05	Others	Others	Plumbagin, a quinoid constituent isolated from the root of the medicinal plant Plumbago zeylanica L, exerts anticancer and antiproliferative activities in animal models and in cell culture.	188.18	481-42-5	37	196.62			http://selleckchem.com/products/plumbagin.html	C11H8O3	free base	Plumbagine, Plumbaein, Plumbagone	CC1=CC(=O)C2=C(C=CC=C2O)C1=O	1.962	2	1	0
S4872	Titanium tetrafluoride	h3	L2000-05	Others	Others	Titanium tetrafluoride is an inorganic compound that is an effective but instable caries preventive agent.	123.86	7783-63-3	The physical form of the compound is liquid, which can be dissolved in any proportion.				http://selleckchem.com/products/titanium-tetrafluoride.html	F4Ti	salt	N/A	F[Ti](F)(F)F	0.795	0	0	0
S4908	SN-38	a4	L2000-05	Topoisomerase	DNA Damage	SN-38 is an active metabolite of CPT-11, inhibits DNA topoisomerase I, DNA synthesis and causes frequent DNA single-strand breaks.	392.4	86639-52-3	21	53.5168	<1		http://selleckchem.com/products/sn-38.html	C22H20N2O5	free base	N/A	CCC1=C2CN3C(=O)C4=C(C=C3C2=NC5=C1C=C(O)C=C5)C(O)(CC)C(=O)OC4	2.446	4	1	2
S4926	(R)-Nepicastat HCl	b4	L2000-05	Hydroxylase	Metabolism	(R)-Nepicastat HCl, the R-enantiomer of Nepicastat HCl, is a potent and selective inhibitor with IC50 of 25.1 nM and 18.3 nM for bovine and human dopamine-β-hydroxylase, with negligible affinity for twelve other enzymes and thirteen neurotransmitter receptors.	331.81	195881-94-8	66	198.909	<1		http://selleckchem.com/products/r-nepicastat-hcl.html	C14H16ClF2N3S	Hydrochloride	RS-25560-198 HCl	Cl.NCC1=CNC(=S)N1C2CCC3=C(F)C=C(F)C=C3C2	3.008	0	2	2
S5154	Tetrahydropiperine	c4	L2000-05	Others	Others	Tetrahydropiperine, derived from piperine, can be used to treat convulsion, epilepsy, relieve pain, and control insects.	289.37	23434-88-0	57	196.98			http://selleckchem.com/products/tetrahydropiperine.html	C17H23NO3	free base	Cosmoperine	O=C(CCCCC1=CC2=C(OCO2)C=C1)N3CCCCC3	3.332	3	0	5
S5222	Coluracetam	d4	L2000-05	Others	Others	Coluracetam (BCI-540, MKC-231) is a nootropic belonging to the racetam family of drugs with cognitive enhancing and neuroprotective effects.	341.40	135463-81-9	68	199.18	<1		http://selleckchem.com/products/coluracetam.html	C19H23N3O3	free base	MKC-231, BCI-540	CC1=C(C)C2=C(O1)N=C3CCCCC3=C2NC(=O)CN4CCCC4=O	1.975	4	1	3
S5242	Cediranib Maleate	e4	L2000-05	VEGFR	Protein Tyrosine Kinase	Cediranib Maleate is the maleate salt of Cediranib, which is a potent inhibitor of VEGFR with IC50 of <1 nM and also inhibits Flt1/4 with IC50 of 5 nM/≤3 nM.	566.58	857036-77-2	100	176.498	<1		http://selleckchem.com/products/cediranib-maleate.html	C29H31FN4O7	maleate	AZD-2171 maleate	COC1=CC2=C(OC3=C(F)C4=C([NH]C(=C4)C)C=C3)N=CN=C2C=C1OCCCN5CCCC5.OC(=O)\C=C/C(O)=O	1.765	7	1	10
S5268	Solithromycin	f4	L2000-05	Anti-infection	Microbiology	Solithromycin, belonging to the well-known class of macrolide antibiotics that also includes azithromycin, is a potent bacterial protein synthesis inhibitor.	845.01	760981-83-7	100	118.342	<1		http://selleckchem.com/products/solithromycin.html	C43H65FN6O10	free base	CEM-101, OP-1068	CCC1OC(=O)C(C)(F)C(=O)C(C)C(OC2OC(C)CC(C2O)N(C)C)C(C)(CC(C)C(=O)C(C)C3N(CCCC[N]4C=C(N=N4)C5=CC=CC(=C5)N)C(=O)OC13C)OC	4.802	11	2	11
S5274	GS967	g4	L2000-05	Sodium Channel	Transmembrane Transporters	GS967 is a potent and selective inhibitor of late INa with anti-arrhythmic actions.	347.22	1262618-39-2	45	129.601	<1		http://selleckchem.com/products/gs967.html	C14H7F6N3O	free base	GS458967	FC(F)(F)OC1=CC=C(C=C1)C2=C[N]3C(=NN=C3C(F)(F)F)C=C2	5.307	3	0	4
S5275	RAD140	h4	L2000-05	Androgen Receptor	Endocrinology & Hormones	RAD140 is a potent, orally bioavailable, nonsteroidal selective androgen receptor modulator with Ki value of 7 nM as well as good selectivity over other steroid hormone nuclear receptors.	393.83	1182367-47-0	78	198.055			http://selleckchem.com/products/rad140.html	C20H16ClN5O2	free base	testolone	CC(O)C(NC1=C(C)C(=C(C=C1)C#N)Cl)C2=NN=C(O2)C3=CC=C(C=C3)C#N	3.596	3	2	5
S5285	RU58841	a5	L2000-05	Androgen Receptor	Endocrinology & Hormones	RU58841, also known as PSK-3841 or HMR-3841, is a non-steroidal anti-androgen.	369.34	154992-24-2	73	197.65	<1		http://selleckchem.com/products/ru58841.html	C17H18F3N3O3	free base	PSK3841, HMR3841	CC1(C)N(CCCCO)C(=O)N(C1=O)C2=CC=C(C#N)C(=C2)C(F)(F)F	2.548	2	1	6
S5307	PSI-6206 (RO-2433, GS-331007)	b5	L2000-05	HCV Protease	Proteases	PSI-6206 (RO-2433, GS-331007) is a potent inhibitor of the hepatitis C virus RNA-dependent RNA polymerase, targeting NS5B polymerase.	260.22	863329-66-2	52	199.831	52	199.831	http://selleckchem.com/products/psi-6206-ro-2433-gs-331007.html	C10H13FN2O5	free base	2'-deoxy-2'-fluoro-2'-C-methyluridine	CC1(F)C(O)C(CO)OC1N2C=CC(=O)NC2=O	-1.306	3	3	2
S5314	HTHQ(1-O-Hexyl-2,3,5-trimethylhydroquinone)	c5	L2000-05	Others	Others	HTHQ, which is a hydroquinone monoalkylether, is a potent anti-oxidative and anti-lipid-peroxidative agent.	236.35	148081-72-5	47	198.858			http://selleckchem.com/products/hthq-1-o-hexyl-2-3-5-trimethylhydroquinone.html	C15H24O2	0	N/A	CCCCCCOC1=CC(=C(O)C(=C1C)C)C	5.271	1	1	6
S5316	NU2058	d5	L2000-05	CDK	Cell Cycle	NU2058 is an inhibitor of CDK2 with IC50 value of 17 μM in an isolated enzyme assay. It also potentiates melphalan (DMF 2.3), and monohydroxymelphalan (1.7), but not temozolomide or ionising radiation.	247.30	161058-83-9	49	198.14	<1		http://selleckchem.com/products/nu2058.html	C12H17N5O	free base	O(6)-Cyclohexylmethylguanine	NC1=NC2=C(N=C[NH]2)C(=N1)OCC3CCCCC3	2.251	4	2	3
S5319	AWD 131-138	e5	L2000-05	Others	Others	AWD 131-138 is a centrally acting anti-epileptic which crosses the blood brain barrier and is used for the treatment of canine idiopathic epilepsy.	279.72	188116-07-6	30	107.25	<1		http://selleckchem.com/products/awd-131-138.html	C13H14ClN3O2	free base	Imepitoin, ELB-138	ClC1=CC=C(C=C1)N2CC(=NC2=O)N3CCOCC3	1.44	3	0	2
S5321	Y15	f5	L2000-05	FAK	Angiogenesis	Y15 is a small-molecule FAK scaffolding inhibitor that directly inhibits FAK autophosphorylation in a dose- and time-dependent manner.	284.01	4506-66-5	56	197.176	56	197.176	http://selleckchem.com/products/y15.html	C6H14Cl4N4	tetrahydrochloride	1,2,4,5-Benzenetetraamine tetrahydrochloride	Cl.Cl.Cl.Cl.NC1=CC(=C(N)C=C1N)N	0.371	0	4	0
S5373	Pseudolaric Acid B	g5	L2000-05	p38	MAPK	Pseudolaric acid B, a natural diterpenoid compound, is isolated from Pseudolarix kaempferi.	432.46	82508-31-4	86	198.862	<1		http://selleckchem.com/products/.html	C23H28O8	S5369	N/A	COC(=O)C1=CCC23CCC(C(C)(OC2=O)\C=C\C=C(C)\C(O)=O)C3(CC1)OC(C)=O	2.793	7	0	7
S5386	7-Dehydrocholesterol	h5	L2000-05	Others	Others	One of the isotopic labelled form of 7-DehydroCholesterol, which is a vitamin precursor.	384.638	434-16-2	76	197.589	-1	-2.59985	http://selleckchem.com/products/.html	C27H44O	free base	Cholesta-5,7-dien-3β-ol d6	CC(C)CCCC(C)C1CCC2C3=CC=C4CC(O)CCC4(C)C3CCC12C	7.126	0	1	5
S5387	D-Tagatose	a6	L2000-05	Others	Others	Monosaccharides	180.156	87-81-0	36	199.827	-1	-5.55075	http://selleckchem.com/products/.html	C6H12O6	free base		OCC(O)C(O)C(O)C(=O)CO	-2.874	1	5	5
S5394	Tizoxanide	b6	L2000-05	HCV Protease	Microbiology	Tizoxanide, a thiazolide anti-infective, is active against anaerobic bacteria, protozoa, and a range of viruses in cell culture models, and is currently in phase II clinical development for treating chronic hepatitis C.	265.245	173903-47-4	27	101.793	<1		http://selleckchem.com/products/tizoxanide.html	C10H7N3O4S	free base	Desacetyl-nitazoxanide	OC1=CC=CC=C1C(=O)NC2=NC=C(S2)[N+]([O-])=O	1.388	2	2	3
S5426	Bromopyruvic acid	c6	L2000-05	Others	Others	Bromopyruvic acid is a hexokinase II inhibitor with Ki of 2.4 mM for glycolysis/hexokinase inhibition. It is inhibitor of tumour cell energy metabolism and chemopotentiator of platinum drugs.	166.96	1113-59-3	33	197.652			http://selleckchem.com/products/bromopyruvic-acid.html	C3H3BrO3	free base	3-Bromopyruvic acid, 3-Bromopyruvate	OC(=O)C(=O)CBr	0.348	2	0	2
S5451	Ferulic acid methyl ester	d6	L2000-05	Immunology & Inflammation related	Immunology & Inflammation	Methyl ferulate is a lipophilic derivative of ferulic acid, which is a hydroxycinnamic acid that is abundant in plants. It shows the strongest antioxidant activity and can protect against inflammation and cancer.	208.21	2309-07-1	41	196.917	41	196.917	http://selleckchem.com/products/ferulic-acid-methylester.html	C11H12O4	free base	Methyl Ferulate, Methyl 4'-hydroxy-3'-methoxycinnamate	COC(=O)\C=C\C1=CC=C(O)C(=C1)OC	1.894	3	1	4
S5458	Verbascoside	e6	L2000-05	Immunology & Inflammation related	Immunology & Inflammation	Verbascoside, a phenylpropanoid glycoside from lemon verbena, has several biological properties such as anti-inflammatory, antimicrobial, antitumor, and antioxidant.	624.59	61276-17-3	100	160.105	100	160.105	http://selleckchem.com/products/verbascoside.html	C29H36O15	free base	Acteoside, Kusaginin	CC1OC(OC2C(O)C(OCCC3=CC=C(O)C(=C3)O)OC(CO)C2OC(=O)\C=C\C4=CC=C(O)C(=C4)O)C(O)C(O)C1O	0.484	6	9	11
S5514	Lanthanum(III) chloride heptahydrate	f6	L2000-05	Calcium Channel	Transmembrane Transporters	Lanthanum(III) chloride is the inorganic compound used in biochemical research to block the activity of divalent cation channels, mainly calcium channels.	371.37	10025-84-0	50	134.637			http://selleckchem.com/products/lanthanum-iii-chloride-heptahydrate.html	Cl3H14LaO7	salt	N/A	O.O.O.O.O.O.O.Cl[La](Cl)Cl	0.006	0	0	0
S5615	GW501516	g6	L2000-05	PPARδ	Metabolism	GW501516 is a effective and highly specifc PPARβ/δ agonist	453.5	317318-70-0	90	198.456			http://selleckchem.com/products/.html	C21H18F3NO3S2	free base	N/A	CC1=C(OCC(O)=O)C=CC(=C1)SCC2=C(C)N=C(S2)C3=CC=C(C=C3)C(F)(F)F	5.59	3	0	8
S5616	4-Methylcatechol	h6	L2000-05	Others	Others	an antagonist of the androgen receptor (AR) signaling pathway	124.137	452-86-8	24	193.334	-1	-8.0556	http://selleckchem.com/products/.html	C7H8O2	free base	2-Hydroxy-4-methylphenol; 4-Methyl-1,2-benzenediol (4-methylpyrocatechol); 4-Methyl-1,2-dihydroxybenzene; 4-methyl-2-benzenediol; 4-methyl-benzene-1,2-diol; 4-methyl-pyrocatecho	CC1=CC(=C(O)C=C1)O	1.832	0	2	0
S5620	NSI-189	a7	L2000-05	Others	Others	NSI-189, a small molecule with enhanced neurogenic activity, is a potential antidepressant for the treatment of major depressive disorder (MDD), cognitive impairment and neurodegeneration.	366.5	1270138-40-3	73	199.182	<1		http://selleckchem.com/products/nsi-189.html	C22H30N4O	free base	N/A	CC(C)CCNC1=NC=CC=C1C(=O)N2CCN(CC2)CC3=CC=CC=C3	3.562	2	1	7
S5711	Deracoxib	b7	L2000-05	COX	Immunology & Inflammation	Deracoxib is a COX-2 inhibitor with >48-fold selectivity over COX-1. It also exhibits inhibitory activity against phosphodiesterase (Ki = 3.6 μM against human PDE4D3).	397.372	169590-41-4	80	201.323	<1		http://selleckchem.com/products/deracoxib.html	C17H14F3N3O3S	free base	SC-046	COC1=C(F)C=C(C=C1)C2=CC(=N[N]2C3=CC=C(C=C3)[S](N)(=O)=O)C(F)F	3.642	4	1	5
S5752	Abametapir	c7	L2000-05	Others	Others	Abametapir, the active ingredient of Xeglyze Lotion, is an inhibitor of <b>metalloproteinases</b> critical for louse survival and egg development.	184.24	1762-34-1	37	200.825	-1		http://www.selleckchem.com/products/abametapir.html	C12H12N2	Free Base	HA-44, BRN 0123183	CC1=CN=C(C=C1)C2=CC=C(C)C=N2	2.876	2	0	1
S5753	Setipiprant(ACT-129968, KYTH-105)	d7	L2000-05	Immunology & Inflamm	Immunology & Inflammation	Setipiprant(ACT-129968, KYTH-105) is a selective, orally available antagonist of the <b>prostaglandin D2 receptor 2 (DP2)</b> that that has been shown to have greater specificity for DP2 (CRTH2) than for DP1.	402.42	866460-33-5	80	198.797	-1		http://www.selleckchem.com/products/act-129968-setipiprant.html	C24H19FN2O3	Free Base	N/A	OC(=O)C[N]1C2=C(CN(CC2)C(=O)C3=C4C=CC=CC4=CC=C3)C5=C1C=CC(=C5)F	4.002	2	0	3
S5771	sulforaphane	e7	L2000-05	Nrf2	Immunology & Inflammation	Sulforaphane is a naturally occurring isothiocyanate derived from the consumption of cruciferous vegetables, such as broccoli, cabbage, and kale. It is an inducer of <b>Nrf2</b>.	177.29	4478-93-7	The physical form of the compound is liquid, which can be dissolved in any proportion.				http://www.selleckchem.com/products/sulforaphane.html	C6H11NOS2	Free Base	N/A	C[S](=O)CCCCN=C=S	1.157	2	0	5
S5793	Motesanib (AMG-706)	f7	L2000-05	VEGFR	Protein Tyrosine Kinase	Motesanib (AMG-706) is an orally bioavailable <b>receptor tyrosine kinase</b> inhibitor with IC50 values of 2 nM, 3 nM, 6 nM, 8 nM, 84 nM, 59 nM for VEGFR1, VEGFR2, VEGFR3, Kit, PDGFR and Ret, respectively.	373.45	453562-69-1	75	200.83	1	2.67773	http://www.selleckchem.com/products/motesanib-amg-706.html	C22H23N5O	Free Base	N/A	CC1(C)CNC2=CC(=CC=C12)NC(=O)C3=C(NCC4=CC=NC=C4)N=CC=C3	2.721	3	3	5
S5803	Alrestatin	g7	L2000-05	Others	Others	Alrestatin is an inhibitor of <b>aldose reductase</b> which is involved in the pathogenesis of complications of diabetes mellitus, including diabetic neuropathy.	255.23	51411-04-2	51	199.82	<1		http://www.selleckchem.com/products/alrestatin.html	C14H9NO4	Free Base	N/A	OC(=O)CN1C(=O)C2=C3C(=CC=C2)C=CC=C3C1=O	1.252	3	0	2
S5804	N-Acetylcysteine amide	h7	L2000-05	Immunology & Inflamm	Immunology & Inflammation	N-acetylcysteine amide is a membrane penetrating antioxidant with anti-inflamatory activity through regulation of activation of NF-κB and HIF-1α as well as modulation of ROS.	162.21	38520-57-9	32	197.275	32	197.275	http://www.selleckchem.com/products/n-acetylcysteine-amide.html	C5H10N2O2S	Free Base	N/A	CC(=O)NC(CS)C(N)=O	-1.205	2	2	3
S5807	HMN-176	a8	L2000-05	Others	Others	HMN-176 is an active metabolite of HMN-214, which has a potent antitumor activity in mouse xenograft models.	382.43	173529-10-7	76	198.729	<1		http://www.selleckchem.com/products/hmn-176.html	C20H18N2O4S	Free Base	N/A	COC1=CC=C(C=C1)[S](=O)(=O)NC2=C(C=CC=C2)\C=C\C3=CC=[N+]([O-])C=C3	2.292	3	1	6
S5811	Kevetrin hydrochloride	b8	L2000-05	p53	Apoptosis	Kevetrin hydrochloride is a water-soluble, small molecule and activator of the <b>tumor suppressor protein p53</b>, with potential antineoplastic activity.	179.67	66592-89-0	36	200.367	36	200.367	http://www.selleckchem.com/products/kevetrin-hydrochloride.html	C5H10ClN3S	hydrochloride	Thioureidobutyronitrile HCl	Cl.NC(=N)SCCCC#N	1.105	0	1	4
S5814	cariporide	c8	L2000-05	Sodium Channel	Transmembrane Transporters	Cariporide is a selective and potent inhibitor of <b>NHE1</b> with an IC50 of 30 nM for hNHE1 in CHO-K1 cells.	283.35	159138-80-4	87	307.041	<1		http://www.selleckchem.com/products/cariporide.html	C12H17N3O3S	Free Base	N/A	CC(C)C1=CC=C(C=C1[S](C)(=O)=O)C(=O)NC(N)=N	1.386	3	2	4
S5840	Palifosfamide	d8	L2000-05	DNA alkylator	DNA Damage	Palifosfamide is a novel DNA alkylator and the active metabolite of ifosfamide with potential antineoplastic activity.	221.02	31645-39-3	44	199.077	13	58.8182	http://www.selleckchem.com/products/palifosfamide.html	C4H11Cl2N2O2P	Free Base	ZIO-201, Isophosphamide mustard	O[P](=O)(NCCCl)NCCCl	0.018	1	2	6
S5903	JANEX-1	e8	L2000-05	JAK	JAK/STAT	JANEX-1 is a small molecule inhibitor of <b>JAK3</b> that selectively inhibits JAK3 at an IC50 of 78 µM without altering the activity of JAK1 or JAK2, or any other protein tyrosine kinases (IC50 ≥ 350 µM).	297.31	202475-60-3	5	16.8175	<1		http://www.selleckchem.com/products/janex-1.html	C16H15N3O3	Free Base	WHI-P131	COC1=C(OC)C=C2C(=NC=NC2=C1)NC3=CC=C(O)C=C3	3.202	4	2	4
S5904	WHI-P97	f8	L2000-05	JAK	JAK/STAT	WHI-P97 is a potent inhibitor of <b>JAK-3</b> with an estimated Ki value of 0.09 μM in modeling studies and a measured IC50 value of 2.5 μM in EGFR kinase inhibition assays.	455.1	211555-05-4	8	17.5786	<1		http://www.selleckchem.com/products/whi-p97.html	C16H13Br2N3O3	Free Base	N/A	COC1=CC2=NC=NC(=C2C=C1OC)NC3=CC(=C(O)C(=C3)Br)Br	4.699	4	2	4
S5905	Suberohydroxamic acid	g8	L2000-05	HDAC	Epigenetics	Suberohydroxamic acid is a competitive <b>HDAC</b> inhibitor with IC50 values of 0.25 and 0.3 μM for HDAC1 and HDAC3 respectively.	204.22	38937-66-5	41	200.764	4	19.5867	http://www.selleckchem.com/products/suberohydroxamic-acid.html	C8H16N2O4	Free Base	suberic bishydroxamic acid	ONC(=O)CCCCCCC(=O)NO	0.235	2	2	7
S5917	Solcitinib	h8	L2000-05	JAK	JAK/STAT	Solcitinib is an inhibitor of <b>JAK1</b> with an IC50 of 8-9 nM, and shows 11-, 55- and 23-fold selectivity over JAK2, JAK3 and TYK2, respectively.	389.45	1206163-45-2	30	77.0317	<1		http://www.selleckchem.com/products/solcitinib.html	C22H23N5O2	Free Base	GLPG0778, GSK2586184	CC1(C)CN(C1)C(=O)C2=CC=C(C=C2)C3=CC=CC4=NC(=N[N]34)NC(=O)C5CC5	3.118	4	1	4
S5930	PNU 282987	a9	L2000-05	AChR	Metabolism	PNU 282987 is a potent agonist of <b>α7-containing neuronal nicotinic acetylcholine receptors</b> with Ki value of 26 nM for the rat receptor.	301.21	123464-89-1	46	152.717	11	36.5194	http://www.selleckchem.com/products/pnu-282987.html	C14H18Cl2N2O	Free Base	N/A	Cl.ClC1=CC=C(C=C1)C(=O)NC2CN3CCC2CC3	2.62	1	1	2
S6002	NXY-059 (Disufenton sodium)	b9	L2000-05	Others	Others	NXY-059 is a novel nitrone, shows efficacious neuroprotective effects. Phase 3.	381.33	168021-79-2	76	199.302	76	199.302	http://selleckchem.com/products/NXY-059.html	C11H13NNa2O7S2	Disodium salt	Cerovive, Disufenton Sodium	[Na+].[Na+].CC(C)(C)/[N+]([O-])=C/C1=CC=C(C=C1[S]([O-])(=O)=O)[S]([O-])(=O)=O	-3.972	0	0	4
S6005	VX-702	c9	L2000-05	p38 MAPK	MAPK	VX-702 is a highly selective inhibitor of p38α MAPK, 14-fold higher potency against the p38α versus p38β. Phase 2.	404.3	745833-23-2	81	200.346	<1		http://selleckchem.com/products/VX-702.html	C19H12F4N4O2	free base	N/A	NC(=O)N(C1=NC(=C(C=C1)C(N)=O)C2=C(F)C=C(F)C=C2)C3=C(F)C=CC=C3F	3.682	3	2	4
S6243	Ethyl pyruvate	d9	L2000-05	Immunology & Inflamm	Immunology & Inflammation	Ethyl pyruvate is a simple aliphatic ester of pyruvic acid and has been shown to have robust neuroprotective effects via its anti-inflammatory, anti-oxidative, and anti-apoptotic functions.	116.12	617-35-6	The physical form of the compound is liquid, which can be dissolved in any proportion.				http://www.selleck.cn/products/ethyl-pyruvate.html	C5H8O3_x000D_	free base	CTI-01	CCOC(=O)C(C)=O	0.246	3	0	3
S6249	Picolinic acid (PCL 016)	e9	L2000-05	Immunology & Inflamm	Immunology & Inflammation	PCL016 is a pyridine carboxylate metabolite of tryptophan and acts as an anti-infective and immunomodulator. It acts by binding with the zinc associated with zinc finger proteins to alter their structure and inhibit function.	123.11	98-98-6	24.622	200			http://www.selleck.cn/products/picolinic-acid-pcl-016.html	C6H5NO2_x000D_	free base	N/A	OC(=O)C1=NC=CC=C1	0.737	2	0	1
S7009	LCL161	f9	L2000-05	IAP	Apoptosis	LCL-161, a small molecule second mitochondrial activator of caspase (SMAC) mimetic, potently binds to and inhibits multiple IAPs (i.e. XIAP, c-IAP).	500.63	1005342-46-0	100	199.748	<1		http://selleckchem.com/products/lcl161.html	C26H33FN4O3S	free base	N/A	CNC(C)C(=O)NC(C1CCCCC1)C(=O)N2CCCC2C3=NC(=CS3)C(=O)C4=CC=C(F)C=C4	3.785	4	2	8
S7010	GDC-0152	g9	L2000-05	IAP	Apoptosis	GDC-0152 is a potent antagonist of XIAP-BIR3, ML-IAP-BIR3, cIAP1-BIR3 and cIAP2-BIR3 with Ki of 28 nM, 14 nM, 17 nM and 43 nM in cell-free assays, respectively less affinity shown to cIAP1-BIR2 and cIAP2-BIR2. Phase 1.	498.64	873652-48-3	99	198.54	3	6.01636	http://selleckchem.com/products/gdc-0152.html	C25H34N6O3S	free base	N/A	CNC(C)C(=O)NC(C1CCCCC1)C(=O)N2CCCC2C(=O)NC3=C(N=NS3)C4=CC=CC=C4	2.767	5	3	8
S7014	Merestinib (LY2801653)	h9	L2000-05	c-Met	Protein Tyrosine Kinase	LY2801653 is a type-II ATP competitive, slow-off inhibitor of MET tyrosine kinase with a dissociation constant (Ki) of 2 nM, a pharmacodynamic residence time (Koff) of 0.00132 min(-1) and t1/2 of 525 min.	552.53	1206799-15-6	100	180.986	<1		http://selleckchem.com/products/ly2801653-merestinib.html	C30H22F2N6O3	free base	N/A	C[N]1N=CC2=CC(=C(C=C12)C3=C[NH]N=C3)OC4=C(F)C=C(NC(=O)C5=CC=C(C)N(C5=O)C6=CC=C(F)C=C6)C=C4	4.5	5	2	6
S7015	Birinapant	a10	L2000-05	IAP	Apoptosis	Birinapant is a SMAC mimetic antagonist, mostly to cIAP1 with Kd of <1 nM in a cell-free assay, less potent to XIAP. Phase 2.	806.94	1260251-31-7	100	123.925	<1		http://selleckchem.com/products/birinapant-tl32711.html	C42H56F2N8O6	free base	TL32711	CCC(NC(=O)C(C)NC)C(=O)N1CC(O)CC1CC2=C([NH]C3=C2C=CC(=C3)F)C4=C(CC5CC(O)CN5C(=O)C(CC)NC(=O)C(C)NC)C6=C([NH]4)C=C(F)C=C6	3.08	4	8	15
S7016	VS-5584 (SB2343)	b10	L2000-05	PI3K	PI3K/Akt/mTOR	VS-5584 (SB2343) is a potent and selective dual PI3K/mTOR inhibitor for mTOR, PI3Kα/β/δ/γ with IC50 of 3.4 nM and 2.6-21 nM, respectively. Phase 1.	354.41	1246560-33-7	71	200.333	<1		http://selleckchem.com/products/vs-5584-sb2343.html	C17H22N8O	free base	N/A	CC(C)[N]1C(=NC2=C1N=C(N=C2C3=CN=C(N)N=C3)N4CCOCC4)C	1.272	6	1	3
S7029	AZD2461	c10	L2000-05	PARP	DNA Damage	AZD2461 is a novel PARP inhibitor with low affinity for Pgp than Olaparib. Phase 1.	395.43	1174043-16-3	79	199.783	<1		http://selleckchem.com/products/azd2461.html	C22H22FN3O3	free base	N/A	COC1CCN(CC1)C(=O)C2=CC(=CC=C2F)CC3=NNC(=O)C4=CC=CC=C34	1.993	4	1	4
S7030	RG-7112	d10	L2000-05	Mdm2	Apoptosis	RG7112 (RO5045337) is an orally bioavailable and selective p53-MDM2 inhibitor with HTRF IC50 of 18 nM.	726.28	939981-39-2	100	137.688	<1		http://selleckchem.com/products/rg-7112.html	C38H48Cl2N4O4S	free base	RO5045337	CCOC1=C(C=CC(=C1)C(C)(C)C)C2=NC(C)(C3=CC=C(Cl)C=C3)C(C)(N2C(=O)N4CCN(CCC[S](C)(=O)=O)CC4)C5=CC=C(Cl)C=C5	7.622	5	0	10
S7036	XL019	e10	L2000-05	JAK	JAK/STAT	XL019 is a potent and selective JAK2 inhibitor with IC50 of 2.2 nM, exhibiting >50-fold selectivity over JAK1, JAK3 and TYK2. Phase 1.	444.53	945755-56-6	16	35.9931	<1		http://selleckchem.com/products/xl019.html	C25H28N6O2	free base	N/A	O=C(NC1=CC=C(C=C1)C2=CC=NC(=N2)NC3=CC=C(C=C3)N4CCOCC4)C5CCCN5	3.106	4	3	6
S7039	PD168393	f10	L2000-05	EGFR	Protein Tyrosine Kinase	PD168393 is an irreversible EGFR inhibitor with IC50 of 0.70 nM, irreversibly alkylate Cys-773 inactive against insulin, PDGFR, FGFR and PKC.	369.22	194423-15-9	73	197.714	<1		http://selleckchem.com/products/pd168393.html	C17H13BrN4O	free base	N/A	BrC1=CC(=CC=C1)NC2=NC=NC3=CC=C(NC(=O)C=C)C=C23	4.043	3	2	4
S7040	AZD3514	g10	L2000-05	Androgen Receptor	Endocrinology & Hormones	AZD3514 is a potent and oral androgen receptor downregulator with Ki of 2.2 μM and has ability of reducing AR protein expression.Phase 1.	519.56	1240299-33-5	100	192.471	<1		http://selleckchem.com/products/azd3514.html	C25H32F3N7O2	free base	N/A	CC(=O)N1CCN(CCOC2=CC=C(C=C2)C3CCN(CC3)C4=N[N]5C(=NN=C5C(F)(F)F)CC4)CC1	2.235	5	0	7
S7041	CX-6258 HCl	h10	L2000-05	Pim	JAK/STAT	CX-6258 HCl is a potent, orally efficacious pan-Pim kinase inhibitor with IC50 of 5 nM, 25 nM and 16 nM for Pim1, Pim2, and Pim3, respectively.	498.4	1353859-00-3	57	114.366	89	178.571	http://selleckchem.com/products/CX-6258.html	C26H25Cl2N3O3	Hydrochloride	N/A	Cl.CN1CCCN(CC1)C(=O)C2=CC=CC(=C2)C3=CC=C(O3)\C=C4\C(=O)NC5=C4C=C(Cl)C=C5	4.416	3	1	3
S7046	Brefeldin A	a11	L2000-05	ATPase,Autophagy	Transmembrane Transporters	Brefeldin A is a lactone antibiotic and ATPase inhibitor for protein transport with IC50 of 0.2 μM in HCT 116 cells, induces cancer cell differentiation and apoptosis.	280.36	20350-15-6	4	14.2674	<1		http://selleckchem.com/products/brefeldin-a.html	C16H24O4	free base	N/A	CC1CCC/C=C/C2CC(O)CC2C(O)/C=C/C(=O)O1	2.152	2	2	0
S7049	Oprozomib (ONX 0912)	b11	L2000-05	Proteasome	Proteases	Oprozomib (ONX 0912) is an orally bioavailable inhibitor for CT-L activity of 20S proteasome β5/LMP7 with IC50 of 36 nM/82 nM. Phase 1/2.	532.61	935888-69-0	100	187.755	<1		http://selleckchem.com/products/oprozomib-onx-0912.html	C25H32N4O7S	free base	N/A	COCC(NC(=O)C(COC)NC(=O)C1=CN=C(C)S1)C(=O)NC(CC2=CC=CC=C2)C(=O)C3(C)CO3	-0.202	8	3	14
S7057	LY2874455	c11	L2000-05	FGFR,VEGFR	Protein Tyrosine Kinase	LY2874455 is a pan-FGFR inhibitor with IC50 of 2.8 nM, 2.6 nM, 6.4 nM, and 6 nM for FGFR1, FGFR2, FGFR3, and FGFR4, respectively, and also inhibits VEGFR2 activity with IC50 of 7 nM. Phase 1.	444.31	1254473-64-7	88	198.06	<1		http://selleckchem.com/products/ly2874455.html	C21H19Cl2N5O2	free base	N/A	CC(OC1=CC=C2[NH]N=C(\C=C\C3=C[N](CCO)N=C3)C2=C1)C4=C(Cl)C=NC=C4Cl	4.121	4	2	7
S7063	LY2090314	d11	L2000-05	GSK-3	PI3K/Akt/mTOR	LY2090314 is a potent GSK-3 inhibitor for GSK-3α/β with IC50 of 1.5 nM/0.9 nM may improve the efficacy of platinum-based chemotherapy regimens. LY2090314 is highly selective towards GSK3 as demonstrated by its fold selectivity relative to a large panel of kinases.	512.53	603288-22-8	100	195.111	<1		http://selleckchem.com/products/ly2090314.html	C28H25FN6O3	free base	N/A	FC1=CC2=C3[N](CCN(C2)C(=O)N4CCCCC4)C=C(C3=C1)C5=C(C(=O)NC5=O)C6=CN=C7C=CC=C[N]67	2.707	4	1	2
S7067	Tepotinib (EMD 1214063)	e11	L2000-05	c-Met	Protein Tyrosine Kinase	Tepotinib (EMD 1214063) is a potent and selective c-Met inhibitor with IC50 of 4 nM, >200-fold selective for c-Met than IRAK4, TrkA, Axl, IRAK1, and Mer. Phase 1.	492.57	1100598-32-0	5	10.1508	<1		http://selleckchem.com/products/emd-1214063.html	C29H28N6O2	free base	MSC2156119	CN1CCC(CC1)COC2=CN=C(N=C2)C3=CC=CC(=C3)CN4N=C(C=CC4=O)C5=CC(=CC=C5)C#N	3.629	5	0	7
S7076	T0901317	f11	L2000-05	Liver X Receptor	Others	T0901317 is a potent and selective agonist for both LXR and FXR, with EC50 of ~50 nM and 5 μM, respectively.	481.33	293754-55-9	96	199.447	<1		http://selleckchem.com/products/t0901317.html	C17H12F9NO3S	free base	N/A	OC(C1=CC=C(C=C1)N(CC(F)(F)F)[S](=O)(=O)C2=CC=CC=C2)(C(F)(F)F)C(F)(F)F	4.826	2	0	8
S7090	GSK923295	g11	L2000-05	Kinesin	Cytoskeletal Signaling	GSK923295 is a first-in-class, specific allosteric inhibitor of CENP-E kinesin motor ATPase with Ki of 3.2 nM, and less potent to mutant I182 and T183. Phase 1.	592.13	1088965-37-0	100	168.882	<1		http://selleckchem.com/products/gsk923295.html	C32H38ClN5O4	free base	N/A	CC(C)OC1=CC=C(C=C1Cl)C(=O)NC(CNC(=O)CN(C)C)CC2=CC=C(C=C2)C3=C[N]4C=CC=C(C(C)O)C4=N3	4.004	4	3	12
S7094	PF-3758309	h11	L2000-05	PAK	Cytoskeletal Signaling	PF-03758309 is a potent, ATP-competitive, pyrrolopyrazole inhibitor of PAK4 with IC50 of 1.3 nM.	490.62	898044-15-0	98	199.747	<1		http://selleckchem.com/products/pf-3758309.html	C25H30N8OS	free base	PF-03758309	CN(C)CC(NC(=O)N1CC2=C([NH]N=C2NC3=NC(=NC4=C3SC=C4)C)C1(C)C)C5=CC=CC=C5	4.077	4	3	6
S7097	HSP990 (NVP-HSP990)	a2	L2000-06	HSP (e.g. HSP90)	Cytoskeletal Signaling	NVP-HSP990 (HSP990) is a novel, potent and selective HSP90 inhibitor for HSP90α/β with IC50 of 0.6 nM/0.8 nM.	379.39	934343-74-5	75	197.686	<1		http://selleckchem.com/products/hsp990-nvp-hsp990.html	C20H18FN5O2	free base	N/A	COC1=NC(=CC=C1)C2=C(C=CC(=C2)F)C3CC4=C(C(=NC(=N4)N)C)C(=O)N3	2.669	5	2	3
S7098	PD123319	b2	L2000-06	RAAS	Endocrinology & Hormones	PD 123319 is a potent, selective AT2 angiotensin II receptor antagonist with IC50 of 34 nM.	508.61	130663-39-7	100	196.614	100	196.614	http://selleckchem.com/products/pd123319.html	C31H32N4O3	free base	N/A	CN(C)C1=C(C)C=C(C[N]2C=NC3=C2CC(N(C3)C(=O)C(C4=CC=CC=C4)C5=CC=CC=C5)C(O)=O)C=C1	4.593	3	0	7
S7103	Taselisib (GDC 0032)	c2	L2000-06	PI3K	PI3K/Akt/mTOR	Taselisib (GDC 0032) is a potent, next-generation β isoform-sparing PI3K inhibitor targeting PI3Kα/δ/γ with Ki of 0.29 nM/0.12 nM/0.97nM, >10 fold selective over PI3Kβ.	460.53	1282512-48-4	70	151.999	<1		http://selleckchem.com/products/gdc-0032.html	C24H28N8O2	free base	RG7604	CC(C)[N]1N=C(C)N=C1C2=C[N]3CCOC4=CC(=CC=C4C3=N2)C5=C[N](N=C5)C(C)(C)C(N)=O	2.47	6	1	5
S7104	AZD1208	d2	L2000-06	Pim	JAK/STAT	AZD1208 is a potent, and orally available Pim kinase inhibitor with IC50 of 0.4 nM, 5 nM, and 1.9 nM for Pim1, Pim2, and Pim3 in cell-free assays, respectively. Phase 1.	379.48	1204144-28-4	75	197.639	<1		http://selleckchem.com/products/azd-1208.html	C21H21N3O2S	free base	N/A	NC1CCCN(C1)C2=C(C=CC=C2C3=CC=CC=C3)\C=C\4SC(=O)NC4=O	3.283	2	2	3
S7111	NLG919	e2	L2000-06	IDO	Metabolism	NLG919 is a potent IDO (indoleamine-(2,3)-dioxygenase) pathway inhibitor with Ki/EC50 of 7 nM/75 nM in cell-free assays. Phase 1.	282.38	1402836-58-1	15	53.1199	<1		http://selleckchem.com/products/nlg919.html	C18H22N2O	free base	Navoximod	OC(CC1[N]2C=NC=C2C3=C1C=CC=C3)C4CCCCC4	3.255	1	1	3
S7113	Zebularine	f2	L2000-06	DNA Methyltransferase	Epigenetics	Zebularine is a DNA methylation inhibitor that forms a covalent complex with DNA methyltransferases, also inhibits cytidinedeaminase with Ki of 2 μM in a cell-free assay.	228.2	3690-10-6	46	201.578	46	201.578	http://selleckchem.com/products/zebularine.html	C9H12N2O5	free base	NSC 309132	OCC1OC(C(O)C1O)N2C=CC=NC2=O	-1.747	3	3	2
S7114	NU6027	g2	L2000-06	CDK	Cell Cycle	NU6027 is a potent ATR/CDK inhibitor, inhibits CDK1/2, ATR and DNA-PK with Ki of 2.5 μM/1.3 μM, 0.4 μM and 2.2 μM, enter cells more readily than the 6-aminopurine-based inhibitors.	251.28	220036-08-8	50	198.981	<1		http://selleckchem.com/products/nu6027.html	C11H17N5O2	free base	N/A	NC1=NC(=C(N=O)C(=N1)OCC2CCCCC2)N	2.576	4	2	4
S7115	AMG-517	h2	L2000-06	TRPV	Others	AMG 517 is a potent and selective TRPV1 antagonist, and antagonizes capsaicin, proton, and heat activation of TRPV1 with IC50 of 0.76 nM, 0.62 nM and 1.3 nM， respectively.	430.4	659730-32-2	86	199.814	<1		http://selleckchem.com/products/amg-517.html	C20H13F3N4O2S	free base	N/A	CC(=O)NC1=NC2=C(S1)C=CC=C2OC3=CC(=NC=N3)C4=CC=C(C=C4)C(F)(F)F	4.785	5	1	5
S7119	Go6976	a3	L2000-06	FLT3,JAK,PKC	TGF-beta/Smad	Go6976 is a potent PKC inhibitor with IC50 of 7.9 nM, 2.3 nM, and 6.2 nM for PKC (Rat brain), PKCα, and PKCβ1, respectively. Also a potent inhibitor of JAK2 and Flt3.	377.42	136194-77-9	18	47.6922	<1		http://selleckchem.com/products/go6976.html	C24H18N4O	free base	PD406976	C[N]1C2=C(C=CC=C2)C3=C1C4=C(C5=C3C(=O)NC5)C6=C(C=CC=C6)[N]4CCC#N	4.168	1	1	2
S7121	MLN2480	b3	L2000-06	Raf	MAPK	MLN2480 is an oral, selective pan-Raf kinase inhibitor in chinical trials.	506.29	1096708-71-2	100	197.515	<1		http://selleckchem.com/products/mln2480.html	C17H12Cl2F3N7O2S	free base	BIIB-024, TAK580	CC(NC(=O)C1=C(Cl)C(=NC=N1)N)C2=NC=C(S2)C(=O)NC3=NC=C(Cl)C(=C3)C(F)(F)F	2.932	6	3	6
S7122	XL888	c3	L2000-06	HSP (e.g. HSP90)	Cytoskeletal Signaling	XL888 is an ATP-competitive inhibitor of HSP90 with IC50 of 24 nM. Phase 1.	503.64	1149705-71-4	100	198.555	<1		http://selleckchem.com/products/xl888.html	C29H37N5O3	free base	N/A	CCC(C)NC1=C(C=C(C)C(=C1)C(=O)NC2CC3CCC(C2)N3C4=NC=C(C=C4)C(=O)C5CC5)C(N)=O	3.772	4	3	9
S7125	KPT-185	d3	L2000-06	CRM1	Transmembrane Transporters	KPT-185 is a selective CRM1 inhibitor that induces growth inhibition and apoptosis in a panel of NHL cell lines with a median IC50 ~25 nM.	355.31	1333151-73-7	71	199.826	<1		http://selleckchem.com/products/kpt-185.html	C16H16F3N3O3	free base	N/A	COC1=CC(=CC(=C1)C(F)(F)F)C2=N[N](\C=C/C(=O)OC(C)C)C=N2	2.923	5	0	7
S7132	P5091 (P005091)	e3	L2000-06	DUB	Ubiquitin	P5091(P005091) is a selective and potent inhibitor of ubiquitin-specific protease 7 (USP7) with EC50 of 4.2 μM and the closely related USP47.	348.22	882257-11-6	28	80.4089	<1		http://selleckchem.com/products/p5091-p005091.html	C12H7Cl2NO3S2	free base	N/A	CC(=O)C1=CC(=C(S1)SC2=CC=CC(=C2Cl)Cl)[N+]([O-])=O	4.989	1	0	4
S7138	BMS-833923	f3	L2000-06	Hedgehog/Smoothened	GPCR & G Protein	BMS-833923 is an orally bioavailable Smoothened antagonist. Phase 2.	473.57	1059734-66-5	95	200.604	<1		http://selleckchem.com/products/bms-833923.html	C30H27N5O	free base	XL139	CNCC1=CC(=C(C)C=C1)NC(=O)C2=CC=C(NC3=NC4=CC=CC=C4C(=N3)C5=CC=CC=C5)C=C2	6.214	3	3	7
S7143	LGK-974	g3	L2000-06	Wnt/beta-catenin	Stem Cells & Wnt	LGK-974 is a potent and specific PORCN inhibitor, and inhibits Wnt signaling with IC50 of 0.4 nM in TM3 cells. Phase 1.	396.44	1243244-14-5	79	199.274	<1		http://selleckchem.com/products/lgk-974.html	C23H20N6O	free base	NVP-LGK974	CC1=CC(=CC=N1)C2=C(C)C=C(CC(=O)NC3=CC=C(C=N3)C4=CN=CC=N4)C=N2	2.098	6	1	5
S7144	BMS-911543	h3	L2000-06	JAK	JAK/STAT	BMS-911543 is a potent and selective inhibitor of JAK2 with IC50 of 1.1?nM, ~350-, 75- and 65-fold selective to JAK1, JAK3 and TYK2, respectively. Phase 1/2.	432.52	1271022-90-2	36	83.2331	<1		http://selleckchem.com/products/bms-911543.html	C23H28N8O	free base		CC[N]1C(=CC2=C1N=C(NC3=N[N](C)C(=C3)C)C4=C2[N](C)C=N4)C(=O)N(C5CC5)C6CC6	3.556	4	1	6
S7145	AZD1080	a4	L2000-06	GSK-3	PI3K/Akt/mTOR	AZD1080 is a selective, orally active, brain permeable GSK3 inhibitor, inhibits human GSK3α and GSK3β with Ki of 6.9 nM and 31 nM, respectively, shows >14-fold selectivity against CDK2, CDK5, CDK1 and Erk2.	334.37	612487-72-6	52	155.516	<1		http://selleckchem.com/products/azd1080.html	C19H18N4O2	free base	N/A	OC1=C(C2=CC=C(CN3CCOCC3)C=N2)C4=CC(=CC=C4[NH]1)C#N	2.442	2	2	3
S7155	Batimastat (BB-94)	b4	L2000-06	MMP	Proteases	Batimastat (BB-94) is a potent, broad spectrum matrix metalloprotease (MMP) inhibitor for MMP-1, MMP-2, MMP-9, MMP-7 and MMP-3 with IC50 of 3 nM, 4 nM, 4 nM, 6 nM and 20 nM, respectively. Also inhibits the activitity of other metalloproteases, such as ADAM17.	477.64	130370-60-4	96	200.988	<1		http://selleckchem.com/products/bb-94.html	C23H31N3O4S2	free base	N/A	CNC(=O)C(CC1=CC=CC=C1)NC(=O)C(CC(C)C)C(CSC2=CC=CS2)C(=O)NO	3.218	3	3	12
S7157	Ilomastat (GM6001, Galardin)	c4	L2000-06	MMP	Proteases	Ilomastat (GM6001, Galardin) is a broad spectrum matrix metalloprotease (MMP) inhibitor for MMP-1, MMP-2, MMP-3, MMP-7, MMP-8, MMP-9, MMP-12, MMP-14, and MMP-26 with Ki of 0.4 nM, 0.5 nM, 27 nM, 3.7 nM, 0.1 nM, 0.2 nM, 3.6 nM, 13.4 nM, 0.36 nM, respectively.	388.46	142880-36-2	78	200.793	<1		http://selleckchem.com/products/gm6001.html	C20H28N4O4	free base	N/A	CNC(=O)C(CC1=C[NH]C2=CC=CC=C12)NC(=O)C(CC(C)C)CC(=O)NO	1.624	3	4	9
S7161	Motolimod (VTX-2337)	d4	L2000-06	TLR	Immunology & Inflammation	Motolimod (VTX-2337) is a selective and potent Toll-like receptor (TLR) 8 agonist with EC50 of 100 nM, > 50-fold selectivity over TLR7. Phase 2.	458.6	926927-61-9	55	119.93	<1		http://selleckchem.com/products/motolimod-vtx-2337.html	C28H34N4O2	free base	N/A	CCCN(CCC)C(=O)C1=CC2=C(C=C(C=C2)C3=CC=C(C=C3)C(=O)N4CCCC4)N=C(N)C1	3.854	3	1	7
S7169	Crenigacestat (LY3039478)	e4	L2000-06	Gamma-secretase	Stem Cells & Wnt	Crenigacestat (LY3039478) is an oral Notch inhibitor with an IC50 of 0.41 nM.	464.44	1421438-81-4	92	198.088	<1		http://selleckchem.com/products/ly3039478.html	C22H23F3N4O4	free base		CC(NC(=O)CCC(F)(F)F)C(=O)NC1C(=O)N(CCO)C2=C(C=CC=N2)C3=C1C=CC=C3	1.395	4	3	8
S7170	RO5126766 (CH5126766)	f4	L2000-06	Raf	MAPK	RO5126766 (CH5126766) is a dual RAF/MEK inhibitor with IC50 of 8.2 nM,19 nM, 56 nM, and 160 nM for BRAF V600E, BRAF, CRAF, and MEK1, respectively. Phase 1.	471.46	946128-88-7	94	199.381	<1		http://selleckchem.com/products/ro5126766-ch5126766.html	C21H18FN5O5S	free base	N/A	CN[S](=O)(=O)NC1=NC=CC(=C1F)CC2=C(C)C3=CC=C(OC4=NC=CC=N4)C=C3OC2=O	2.473	8	2	7
S7171	GKT137831	g4	L2000-06	NADPH-oxidase	Others	GKT137831 is a potent, dual NADPH oxidase NOX1/NOX4 inhibitor with Ki of 110 nM and 140 nM, respectivelyl ~10-fold selectivity towards NOX1, 4 and 5 over NOX2, does not inhibit XO or scavange ROS/RNS.	394.85	1218942-37-0	78	197.543	<1		http://selleckchem.com/products/gkt137831.html	C21H19ClN4O2	free base	N/A	CN(C)C1=CC=CC(=C1)C2=C3C(=O)N(NC3=CC(=O)N2C)C4=CC=CC=C4Cl	2.366	2	1	3
S7173	Spebrutinib (CC-292, AVL-292)	h4	L2000-06	BTK	Angiogenesis	Spebrutinib (CC-292, AVL-292) is a covalent, orally active, and highly selective BTK inhibitor with IC50 of <0.5 nM, displaying at least 1400-fold selectivity over the other kinases assayed. Phase 1.	423.44	1202757-89-8	85	200.737	<1		http://selleckchem.com/products/avl-292.html	C22H22FN5O3	free base	CC-292,LMK-435	COCCOC1=CC=C(NC2=NC=C(F)C(=N2)NC3=CC(=CC=C3)NC(=O)C=C)C=C1	4.087	5	3	10
S7174	Opaganib (ABC294640)	a5	L2000-06	S1P Receptor	GPCR & G Protein	Opaganib (ABC294640) is an orally bioavailable and selective sphingosine kinase-2 (SphK2) inhibitor with IC50 of approximately 60 μM. Phase 1/2.	380.91	915385-81-8	76	199.522	<1		http://selleckchem.com/products/abc294640.html	C23H25ClN2O	free base	N/A	ClC1=CC=C(C=C1)[C]23CC4[CH2]C(C[C](C4)(C2)C(=O)NCC5=CC=NC=C5)C3	4.265	2	1	4
S7189	I-BET-762	b5	L2000-06	Epigenetic Reader Domain	Epigenetics	I-BET-762 is an inhibitor for BET proteins with IC50 of ~35 nM in a cell-free assay, suppresses the production of proinflammatory proteins by macrophages and blocks acute inflammation, highly selective over other bromodomain-containing proteins.	423.9	1260907-17-2	84	198.16	<1		http://selleckchem.com/products/i-bet-762.html	C22H22ClN5O2	free base	GSK525762, GSK525762A	CCNC(=O)CC1N=C(C2=CC=C(Cl)C=C2)C3=CC(=CC=C3[N]4C(=NN=C14)C)OC	3.288	5	1	5
S7192	PF-04620110	c5	L2000-06	Transferase	Metabolism	PF-04620110 is an orally active, selective and potent diglyceride acyltransferase-1 (DGAT1) inhibitor with IC50 of 19 nM.	396.44	1109276-89-2	49	123.6	<1		http://selleckchem.com/products/pf-04620110.html	C21H24N4O4	free base	N/A	NC1=C2C(=O)N(CCOC2=NC=N1)C3=CC=C(C=C3)C4CCC(CC4)CC(O)=O	2.797	5	1	4
S7194	GZD824 Dimesylate	d5	L2000-06	Bcr-Abl	Angiogenesis	GZD824 Dimesylate is a novel orally bioavailable Bcr-Abl inhibitor for Bcr-Abl(WT) and Bcr-Abl(T315I) with IC50 of 0.34 nM and 0.68 nM, respectively.	724.77	1421783-64-3	100	137.975	100	137.975	http://selleckchem.com/products/gzd824.html	C31H35F3N6O7S2	Mesylate	N/A	CN1CCN(CC1)CC2=C(C=C(NC(=O)C3=CC(=C(C)C=C3)C#CC4=CC5=C([NH]N=C5)N=C4)C=C2)C(F)(F)F.C[S](O)(=O)=O.C[S](O)(=O)=O	4.047	3	2	7
S7205	Idasanutlin (RG-7388)	e5	L2000-06	Mdm2	Apoptosis	Idasanutlin (RG-7388) is a potent and selective p53-MDM2 inhibitor with IC50 of 6 nM showing improved in vitro binding as well as cellular potency/selectivity.	616.48	1229705-06-9	100	162.211	<1		http://selleckchem.com/products/idasanutlin-rg-7388.html	C31H29Cl2F2N3O4	free base	N/A	COC1=C(NC(=O)C2NC(CC(C)(C)C)C(C#N)(C2C3=C(F)C(=CC=C3)Cl)C4=CC=C(Cl)C=C4F)C=CC(=C1)C(O)=O	3.85	3	2	8
S7211	PF-04418948	f5	L2000-06	Immunology & Inflammation related	Immunology & Inflammation	PF-04418948 is a potent and selective prostaglandin EP? receptor antagonist with IC50 of 16 nM. Phase 1.	409.41	1078166-57-0	81	197.846	<1		http://selleckchem.com/products/pf-04418948.html	C23H20FNO5	free base	N/A	COC1=CC=C2C=C(OCC3(CN(C3)C(=O)C4=CC=C(F)C=C4)C(O)=O)C=CC2=C1	3.298	4	0	6
S7215	Losmapimod (GW856553X)	g5	L2000-06	p38 MAPK	MAPK	Losmapimod (GW856553X) is a selective, potent, and orally active p38 MAPK inhibitor with pKi of 8.1 and 7.6 for p38α and p38β, respectively. Phase 3.	383.46	585543-15-3	76	198.195	<1		http://selleckchem.com/products/losmapimod-gw856553x.html	C22H26FN3O2	free base	GW856553, GSK-AHAB	CC1=C(F)C=C(C=C1C2=CC=C(C=N2)C(=O)NCC(C)(C)C)C(=O)NC3CC3	3.689	3	2	6
S7218	Alvelestat (AZD9668)	h5	L2000-06	Serine Protease	Proteases	Alvelestat (AZD9668) is an oral, highly selective inhibitor of neutrophil elastase (NE) with IC50 and Ki of 12 nM and 9.4 nM, at least 600-fold more selective over other serine proteases. Phase 2.	545.53	848141-11-7	100	183.308	<1		http://selleckchem.com/products/avelestat-azd9668.html	C24H20F3N5O4S	free base	Avelestat	C[N]1N=CC=C1C2=CN(C(=O)C(=C2)C(=O)NCC3=NC=C(C=C3)[S](C)(=O)=O)C4=CC=CC(=C4)C(F)(F)F	2.163	6	1	7
S7242	Erastin	a6	L2000-06	Ferroptosis	Metabolism	Erastin is a ferroptosis activator by acting on mitochondrial VDAC, exhibiting selectivity for tumor cells bearing oncogenic RAS.	547.04	571203-78-6	19	34.7324	<1		http://selleckchem.com/products/erastin.html	C30H31ClN4O4	free base	N/A	CCOC1=C(C=CC=C1)N2C(=O)C3=C(C=CC=C3)N=C2C(C)N4CCN(CC4)C(=O)COC5=CC=C(Cl)C=C5	4.815	5	0	8
S7252	Selinexor (KPT-330)	b6	L2000-06	CRM1	Transmembrane Transporters	Selinexor (KPT-330) is an orally bioavailable selective CRM1 inhibitor. Phase 2.	443.31	1393477-72-9	88	198.507	<1		http://selleckchem.com/products/kpt-330.html	C17H11F6N7O	free base	N/A	FC(F)(F)C1=CC(=CC(=C1)C2=N[N](\C=C/C(=O)NNC3=CN=CC=N3)C=N2)C(F)(F)F	2.345	5	2	7
S7253	AZD2858	c6	L2000-06	GSK-3	PI3K/Akt/mTOR	AZD2858 is a selective GSK-3 inhibitor with an IC50 of 68 nM, activating Wnt signaling, increases bone mass in rats.	453.52	486424-20-8	7	15.4348	<1		http://selleckchem.com/products/azd2858.html	C21H23N7O3S	free base	N/A	CN1CCN(CC1)[S](=O)(=O)C2=CC=C(C=C2)C3=CN=C(N)C(=N3)C(=O)NC4=CN=CC=C4	0.405	6	2	5
S7255	NMS-P937 (NMS1286937)	d6	L2000-06	PLK	Cell Cycle	NMS-P937 (NMS1286937) is an orally available, selective Polo-like Kinase 1 (PLK1) inhibitor with IC50 of 2 nM, 5000-fold selectivity over PLK2/PLK3. Phase 1.	532.52	1034616-18-6	42	78.8703	<1		http://selleckchem.com/products/nms-p937-nms1286937.html	C24H27F3N8O3	free base	N/A	CN1CCN(CC1)C2=CC=C(OC(F)(F)F)C(=C2)NC3=NC4=C(CCC5=C4[N](CCO)N=C5C(N)=O)C=N3	4.742	5	3	8
S7261	Beta-Lapachone	e6	L2000-06	Topoisomerase	DNA Damage	Beta-Lapachone is a selective DNA topoisomerase I inhibitor, exhibiting no inhibitory activities against DNA topoisomerase II or ligase. Phase 2.	242.27	4707-32-8	33	136.212	<1		http://selleckchem.com/products/beta-lapachone.html	C15H14O3	free base	β-Lapachone, ARQ-501	CC1(C)CCC2=C(O1)C3=CC=CC=C3C(=O)C2=O	2.509	3	0	0
S7262	Vidofludimus	f6	L2000-06	Dehydrogenase	Metabolism	Vidofludimus is an orally active and potent dihydroorotate dehydrogenase (DHODH) inhibitor with IC50 of 134 nM for human DHODH. Phase 2.	355.36	717824-30-1	100	281.405	<1		http://selleckchem.com/products/vidofludimus.html	C20H18FNO4	free base	SC12267, 4SC-101	COC1=CC(=CC=C1)C2=CC(=C(NC(=O)C3=C(CCC3)C(O)=O)C=C2)F	3.878	3	1	5
S7263	AZD1981	g6	L2000-06	GPR	Endocrinology & Hormones	AZD1981 is a potent, selective CRTh2 (DP2) receptor antagonist with IC50 of 4 nM, showing >1000-fold selectivity over more than 340 other enzymes and receptors, including DP1. Phase 2.	388.87	802904-66-1	11	28.2871	<1		http://selleckchem.com/products/azd1981.html	C19H17ClN2O3S	free base	N/A	CC(=O)NC1=C2C(=CC=C1)[N](CC(O)=O)C(=C2SC3=CC=C(Cl)C=C3)C	3.859	2	1	5
S7269	PD173955	h6	L2000-06	Bcr-Abl	Angiogenesis	PD173955 is a potent Bcr-Abl inhibitor with IC50 of 1-2 nM, also inhibiting Src activity with IC50 of 22 nM.	443.35	260415-63-2	15	33.8333	<1		http://selleckchem.com/products/pd173955.html	C21H18Cl2N4OS	free base	N/A	CSC1=CC(=CC=C1)NC2=NC3C(C=N2)C=C(C(=O)N3C)C4=C(Cl)C=CC=C4Cl	4.854	3	1	4
S7273	SC75741	a7	L2000-06	NF-κB	NF-κB	SC75741 is a potent NF-κB inhibitor with EC50 of 200 nM.	565.67	913822-46-5	35	61.8735	<1		http://selleckchem.com/products/sc75741.html	C29H23N7O2S2	free base	N/A	O=C(NC1=NC2=CC=C(C=C2[NH]1)C(=O)C3=CC=CC=C3)C4=CSC(=N4)C5CCN(CC5)C6=C7SC=CC7=NC=N6	5.57	6	2	6
S7282	NMS-E973	b7	L2000-06	HSP (e.g. HSP90)	Cytoskeletal Signaling	NMS-E973 is a potent and selective Hsp90 inhibitor with DC50 of <10 nM for Hsp90 binding, no activiy against a panel of 52 diverse protein kinases.	454.43	1253584-84-7	90	198.05	<1		http://selleckchem.com/products/nms-e973.html	C22H22N4O7	free base	N/A	CN1CCC(CC1)NC(=O)C2=NOC(=C2)C3=C(OC4=CC=C(C=C4)[N+]([O-])=O)C=C(O)C=C3O	2.811	4	3	6
S7284	Rociletinib (CO-1686, AVL-301)	c7	L2000-06	EGFR	Protein Tyrosine Kinase	Rociletinib (CO-1686, AVL-301) is an irreversible, mutant-selective EGFR inhibitor with Ki of 21.5 nM and 303.3 nM for EGFRL858R/T790M and EGFRWT in cell-free assays, respectively. Phase 2.	555.55	1374640-70-6	100	180.002	<1		http://selleckchem.com/products/co-1686.html	C27H28F3N7O3	free base	CNX-419	COC1=C(NC2=NC=C(C(=N2)NC3=CC=CC(=C3)NC(=O)C=C)C(F)(F)F)C=CC(=C1)N4CCN(CC4)C(C)=O	4.334	5	3	9
S7291	TAK-632	d7	L2000-06	Raf	MAPK	TAK-632 is a potent pan-Raf inhibitor with IC50 of 8.3 nM and 1.4 nM for B-Raf(wt) and C-Raf in cell-free assays, respectively, showing less or no inhibition against other tested kinases.	554.52	1228591-30-7	100	180.336	<1		http://selleckchem.com/products/tak-632.html	C27H18F4N4O3S	free base	N/A	FC1=C(NC(=O)CC2=CC=CC(=C2)C(F)(F)F)C=C(OC3=C(C#N)C4=C(C=C3)N=C(NC(=O)C5CC5)S4)C=C1	5.74	4	2	8
S7292	RG2833 (RGFP109)	e7	L2000-06	HDAC	Epigenetics	RG2833 (RGFP109) is a brain-penetrant HDAC inhibitor with IC50 of 60 nM and 50 nM for HDAC1 and HDAC3 in cell-free assays, respectively.	339.43	1215493-56-3	68	200.336	<1		http://selleckchem.com/products/rg2833-rgfp109.html	C20H25N3O2	free base	N/A	CC1=CC=C(C=C1)C(=O)NCCCCCC(=O)NC2=CC=CC=C2N	2.895	2	3	8
S7295	Apabetalone (RVX-208)	f7	L2000-06	Epigenetic Reader Domain	Epigenetics	Apabetalone (RVX-208) is a potent BET bromodomain inhibitor with IC50 of 0.510 μM for BD2 in a cell-free assay, about 170-fold selectivity over BD1. Phase 2.	370.4	1044870-39-4	74	199.784	<1		http://selleckchem.com/products/rvx-208.html	C20H22N2O5	free base	RVX-000222	COC1=CC(=C2C(=O)NC(=NC2=C1)C3=CC(=C(OCCO)C(=C3)C)C)OC	2.877	5	2	6
S7304	CPI-203	g7	L2000-06	Epigenetic Reader Domain	Epigenetics	CPI-203 is a potent BET bromodomain inhibitor with IC50 of 37 nM for BRD4.	399.9	1446144-04-2	79	197.549	<1		http://selleckchem.com/products/cpi-203.html	C19H18ClN5OS	free base	N/A	CC1=C(C)C2=C(S1)[N]3C(=NN=C3C(CC(N)=O)N=C2C4=CC=C(Cl)C=C4)C	3.168	4	1	3
S7309	BAY 87-2243	h7	L2000-06	HIF	Angiogenesis	BAY 87-2243 is a potent and selective hypoxia-inducible factor-1 (HIF-1) inhibitor. Phase 1.	525.53	1227158-85-1	33	62.7938	<1		http://selleckchem.com/products/bay-87-2243.html	C26H26F3N7O2	Free Base	N/A	CC1=CC(=N[N]1CC2=CC=NC(=C2)N3CCN(CC3)C4CC4)C5=NC(=NO5)C6=CC=C(OC(F)(F)F)C=C6	6.07	6	0	8
S7323	CHF 5074	a8	L2000-06	Gamma-secretase	Neuronal Signaling	CHF5074 is a <b>gamma-secretase</b> modulator that reduces Aβ42 and Aβ40 secretion. The IC50s of CHF5074 for inhibition of COX-1 and COX-2 is above 100 μmol/L.	325.16	749269-83-8	65	199.902	<1		http://www.selleckchem.com/products/chf-5074.html	C16H11Cl2FO2	Free Base	N/A	OC(=O)C1(CC1)C2=CC(=C(C=C2)C3=CC=C(Cl)C(=C3)Cl)F	5.055	1	0	3
S7326	Tasisulam	b8	L2000-06	Caspase	Apoptosis	Tasisulam is an antitumor agent and an apoptosis inducer via the intrinsic pathway. Phase 3.	415.11	519055-62-0	83	199.947	<1		http://selleckchem.com/products/tasisulam.html	C11H6BrCl2NO3S2	free base	LY573636	ClC1=CC(=C(C=C1)C(=O)N[S](=O)(=O)C2=CC=C(Br)S2)Cl	3.872	3	1	3
S7329	IOWH032	c8	L2000-06	CFTR	Transmembrane Transporters	IOWH032 is a synthetic CFTR inhibitor with IC50 of 1.01 μM in CHO-CFTR cell based assays. Phase 2.	545.18	1191252-49-9	100	183.426	<1		http://selleckchem.com/products/iowh032.html	C22H15Br2N3O4	free base	N/A	OC1=C(Br)C=C(C=C1Br)C2=NOC(=N2)C(=O)NCC3=CC=C(OC4=CC=CC=C4)C=C3	5.233	5	2	6
S7336	CW069	d8	L2000-06	Microtubule Associated	Cytoskeletal Signaling	CW069 is an allosteric, and selective inhibitor of microtubule motor protein HSET with IC50 of 75 μM, significant selectivity over KSP.	500.33	1594094-64-0	100	199.868	<1		http://selleckchem.com/products/cw069.html	C23H21IN2O3	free base	N/A	OC(=O)C1=CC(=CC=C1NC(=O)C(CC2=CC=CC=C2)NCC3=CC=CC=C3)I	1.547	2	2	8
S7339	AZD3965	e8	L2000-06	Others	Others	AZD3965 is a potent, selective and orally available monocarboxylate transporter 1 (MCT1) inhibitor with a binding affinity of 1.6 nM, 6-fold selective over MCT2. Phase 1.	515.51	1448671-31-5	100	193.983	<1		http://selleckchem.com/products/azd3965.html	C21H24F3N5O5S	free base	N/A	CC(C)N1C(=O)N(C)C(=O)C2=C1SC(=C2C(=O)N3CC(C)(O)CO3)CC4=C(C)[NH]N=C4C(F)(F)F	2.066	5	1	5
S7355	ARQ 621	f8	L2000-06	Kinesin	Cytoskeletal Signaling	ARQ 621 is an allosteric, and selective Eg5 mitotic motor protein inhibitor. Phase 1.	552.43	1095253-39-6	100	181.018	<1		http://selleckchem.com/products/arq-621.html	C28H24Cl2FN5O2	free base	N/A	NCCCN(C(CC#C)C1=NC2=C(C=CC(=C2)Cl)C(=O)N1NC3=CC=CC=C3)C(=O)C4=CC=CC(=C4F)Cl	5.98	3	2	9
S7357	PF-562271 HCl	g8	L2000-06	FAK	Angiogenesis	PF-562271 HCl is the hydrochloride salt of PF-562271, which is a potent, ATP-competitive, reversible inhibitor of FAK with IC50 of 1.5 nM, ~10-fold less potent for Pyk2 than FAK and >100-fold selectivity against other protein kinases, except for some CDKs. Phase 1.	543.95	939791-41-0	100	183.84	<1		http://selleckchem.com/products/pf-562271-hcl.html	C21H21ClF3N7O3S	Hydrochloride	N/A	Cl.CN(C1=C(CNC2=C(C=NC(=N2)NC3=CC=C4NC(=O)CC4=C3)C(F)(F)F)C=CC=N1)[S](C)(=O)=O	2.873	6	3	8
S7358	Poziotinib (HM781-36B)	h8	L2000-06	HER2,EGFR	Protein Tyrosine Kinase	Poziotinib (HM781-36B) is an irreversible pan-HER inhibitor with IC50 of 3.2 nM, 5.3 nM and 23.5 nM for HER1, HER2, and HER4, respectively. Phase 2.	491.34	1092364-38-9	98	199.455	<1		http://selleckchem.com/products/poziotinib-hm781-36b.html	C23H21Cl2FN4O3	free base	NOV120101	COC1=CC2=C(C=C1OC3CCN(CC3)C(=O)C=C)C(=NC=N2)NC4=CC=C(Cl)C(=C4F)Cl	5.046	5	1	6
S7360	OTX015	a9	L2000-06	Epigenetic Reader Domain	Epigenetics	OTX015 is a potent BET bromodomain inhibitor with EC50 ranging from 10 to 19 nM for BRD2, BRD3, and BRD4 in cell-free assays. Phase 1.	491.99	202590-98-5	98	199.191	<1		http://selleckchem.com/products/otx015.html	C25H22ClN5O2S	free base	N/A	CC1=C(C)C2=C(S1)[N]3C(=NN=C3C(CC(=O)NC4=CC=C(O)C=C4)N=C2C5=CC=C(Cl)C=C5)C	4.709	4	2	4
S7369	4EGI-1	b9	L2000-06	Others	Others	4EGI-1 is a competitive eIF4E/eIF4G interaction inhibitor by binding to eIF4E with KD of 25 μM.	451.28	315706-13-9	90	199.433	<1		http://selleckchem.com/products/4egi-1.html	C18H12Cl2N4O4S	free base	N/A	OC(=O)C(/CC1=CC=CC=C1[N+]([O-])=O)=N/NC2=NC(=CS2)C3=CC=C(Cl)C(=C3)Cl	5.397	3	1	7
S7379	E-64	c9	L2000-06	Cysteine Protease	Proteases	E-64 is an irreversible and selective cysteine protease inhibitor, and also inhibits papain, calpain, and cathepsins B and H, but not serine proteases or aspartic proteases. The IC50 for papain is 9 nM.	357.41	66701-25-5	71	198.651	11	30.777	http://selleckchem.com/products/e-64.html	C15H27N5O5	free base	N/A	CC(C)CC(NC(=O)C1OC1C(O)=O)C(=O)NCCCCNC(N)=N	-0.864	4	4	12
S7381	Pepstatin A	d9	L2000-06	HIV Protease	Proteases	Pepstatin A is a potent aspartic protease inhibitor, and also inhibits HIV replication.	685.89	26305-03-3	57	83.1037	<1		http://selleckchem.com/products/pepstatin-a.html	C34H63N5O9	free base	N/A	CC(C)CC(NC(=O)C(C)NC(=O)CC(O)C(CC(C)C)NC(=O)C(NC(=O)C(NC(=O)CC(C)C)C(C)C)C(C)C)C(O)CC(O)=O	2.301	6	7	22
S7393	Aloxistatin	e9	L2000-06	Cysteine Protease	Proteases	Aloxistatin is an irreversible and membrane-permeable cysteine protease inhibitor with blood platelet aggregation inhibiting activity.	342.43	88321-09-9	68	198.581	<1		http://selleckchem.com/products/Aloxistatin.html	C17H30N2O5	free base	E-64d	CCOC(=O)C1OC1C(=O)NC(CC(C)C)C(=O)NCCC(C)C	1.611	5	2	11
S7396	Calpeptin	f9	L2000-06	Cysteine Protease	Proteases	Calpeptin is a potent, cell-permeable calpain inhibitor with ID50 of 52 nM, 34 nM, 138 nM, and 40 nM for Calpain I (porcine erythrocytes), Calpain II (porcine kidney), Papainb, and Calpain I (human platelets), respectively.	362.46	117591-20-5	72	198.643	<1		http://selleckchem.com/products/calpeptin.html	C20H30N2O4	free base	N/A	CCCCC(NC(=O)C(CC(C)C)NC(=O)OCC1=CC=CC=C1)C=O	3.8	4	2	12
S7435	AR-A014418	g9	L2000-06	GSK-3	PI3K/Akt/mTOR	AR-A014418 is an ATP-competitive, and selective GSK3β inhibitor with IC50 and Ki of 104 nM and 38 nM in cell-free assays, without significant inhibition on 26 other kinases tested.	308.31	487021-52-3	61	197.853	<1		http://selleckchem.com/products/A014418.html	C12H12N4O4S	free base	GSK-3β Inhibitor VIII	COC1=CC=C(CNC(=O)NC2=NC=C(S2)[N+]([O-])=O)C=C1	1.529	3	2	5
S7445	E3330	h9	L2000-06	DNA/RNA Synthesis	DNA Damage	E3330 is a potent and selective APE1(Ref-1) inhibitor, which suppressed NF-kappa B DNA-binding activity.	378.46	136164-66-4	75	198.172	<1		http://selleckchem.com/products/e3330.html	C21H30O6	free base	N/A	CCCCCCCCCC(=C/C1=C(C)C(=O)C(=C(OC)C1=O)OC)\C(O)=O	4.663	5	0	12
S7456	Osilodrostat (LCI699)	a10	L2000-06	Hydroxylase	Metabolism	LCI699(Osilodrostat) is a potent inhibitor of 11β-hydroxylase, an enzyme catalyzing the final step of cortisol synthesis.	227.24	928134-65-0	45	198.029	15	66.0095	http://selleckchem.com/products/lci699.html	C13H10FN3	free base	Osilodrostat	FC1=C(C=CC(=C1)C#N)C2CCC3=CN=C[N]23	2.02	1	0	1
S7458	VER-49009	b10	L2000-06	HSP (e.g. HSP90)	Cytoskeletal Signaling	VER-49009 is a potent HSP90 inhibitor with IC50 of 47 nM for HSP90β.	387.82	940289-57-6	77	198.546	<1		http://selleckchem.com/products/ver-49009.html	C19H18ClN3O4	free base	CCT0129397	CCNC(=O)C1=C(C2=CC=C(OC)C=C2)C(=N[NH]1)C3=CC(=C(O)C=C3O)Cl	3.751	3	4	5
S7465	FTI 277 HCl	c10	L2000-06	Transferase	Metabolism	FTI 277 HCl is the methyl ester of FTI 277, which is a potent and selective farnesyltransferase (FTase) inhibitor with IC50 of 500 pM, about 100-fold selectivity over the closely related GGTase I.	484.07	180977-34-8	96	198.318	17	35.1189	http://selleckchem.com/products/fti-277-hcl.html	C22H30ClN3O3S2	hydrochloride salt	N/A	Cl.COC(=O)C(CCSC)NC(=O)C1=C(C=C(NCC(N)CS)C=C1)C2=CC=CC=C2	2.897	3	3	12
S7466	GGTI 298 TFA salt	d10	L2000-06	Transferase	Metabolism	GGTI 298 is a geranylgeranyltransferase I inhibitor with ability to arrest human tumor cells in the G1 phase of the cell cycle and induce apoptosis.	593.66	1217457-86-7	100	168.447	<1		http://selleckchem.com/products/ggti-298.html	C29H34F3N3O5S	trifluoroacetat	N/A	COC(=O)C(CC(C)C)NC(=O)C1=CC=C(NCC(N)CS)C=C1C2=C3C=CC=CC3=CC=C2.OC(=O)C(F)(F)F	2.733	4	3	12
S7482	EHT 1864 2HCl	e10	L2000-06	Rho	Cell Cycle	EHT 1864 2HCl is a potent Rac family GTPase inhibitor with Kd of 40 nM, 50 nM, 60 nM and 250 nM for Rac1, Rac1b, Rac2 and Rac3, respectively.	581.47	754240-09-0	100	171.978	100	171.978	http://selleckchem.com/products/eht-1864.html	C25H29Cl2F3N2O4S	dihydrochloride	N/A	Cl.Cl.FC(F)(F)C1=CC2=C(C=C1)C(=CC=N2)SCCCCCOC3=COC(=CC3=O)CN4CCOCC4	4.663	5	0	11
S7488	MPI-0479605	f10	L2000-06	Kinesin	Cytoskeletal Signaling	MPI-0479605 is an ATP competitive and selective inhibitor of mitotic kinase Mps1 with IC50 of 1.8 nM, >40-fold selectivity over other kinases.	407.51	1246529-32-7	62	152.144	<1		http://selleckchem.com/products/mpi-0479605.html	C22H29N7O	free base	N/A	CC1=CC(=CC=C1NC2=NC3=C(N=C[NH]3)C(=N2)NC4CCCCC4)N5CCOCC5	4.379	4	3	5
S7492	Uprosertib (GSK2141795)	g10	L2000-06	Akt	PI3K/Akt/mTOR	Uprosertib (GSK2141795) is a selective, ATP-competitive, and orally bioavailable Akt inhibitor with IC50 of 180 nM, 328 nM, and 38 nM for Akt 1, 2 and 3, respectively. Phase 2.	429.25	1047634-65-0	85	198.02	<1		http://selleckchem.com/products/gsk2141795.html	C18H16Cl2F2N4O2	free base	GSK795	C[N]1N=CC(=C1C2=C(Cl)OC(=C2)C(=O)NC(CN)CC3=CC(=C(F)C=C3)F)Cl	3.531	3	2	6
S7515	VGX-1027	h10	L2000-06	Immunology & Inflammation related	Immunology & Inflammation	VGX-1027 is an orally active immunomodulator. Phase 1.	205.21	6501-72-0	41	199.795	<1		http://selleckchem.com/products/vgx-1027.html	C11H11NO3	free base	GIT 27	OC(=O)CC1CC(=NO1)C2=CC=CC=C2	1.368	3	0	3
S7517	AZD7545	a11	L2000-06	Others	Others	AZD7545 is a potent PDHK inhibitor with IC50 of 36.8 nM and 6.4 nM for PDHK1 and PDHK2, respectively. It failed to inhibit PDHK4 at higher concentrations(>10 nM), AZD7545 stimulates PDHK4 activity.	478.87	252017-04-2	95	198.384	<1		http://selleckchem.com/products/azd7545.html	C19H18ClF3N2O5S	free base	N/A	CN(C)C(=O)C1=CC=C(C=C1)[S](=O)(=O)C2=CC(=C(NC(=O)C(C)(O)C(F)(F)F)C=C2)Cl	2.913	4	1	6
S7520	Darapladib (SB-480848)	b11	L2000-06	Phospholipase (e.g. PLA)	Metabolism	Darapladib (SB-480848) is a reversible lipoprotein-associated phospholipase A2 (Lp-PLA2) inhibitor with IC50 of 0.25 nM. Phase 3.	666.77	356057-34-6	100	149.977	<1		http://selleckchem.com/products/darapladib-sb-480848.html	C36H38F4N4O2S	free base	N/A	CCN(CC)CCN(CC1=CC=C(C=C1)C2=CC=C(C=C2)C(F)(F)F)C(=O)CN3C4=C(CCC4)C(=O)N=C3SCC5=CC=C(F)C=C5	7.707	3	0	14
S7521	Afuresertib (GSK2110183)	c11	L2000-06	Akt	PI3K/Akt/mTOR	Afuresertib (GSK2110183) is a potent, orally bioavailable Akt inhibitor with Ki of 0.08 nM, 2 nM, and 2.6 nM for Akt1, Akt2, and Akt3, respectively. Phase 2.	427.32	1047644-62-1	85	198.914	<1		http://selleckchem.com/products/afuresertib-gsk2110183.html	C18H17Cl2FN4OS	free base	N/A	C[N]1N=CC(=C1C2=C(Cl)SC(=C2)C(=O)NC(CN)CC3=CC=CC(=C3)F)Cl	3.884	2	2	6
S7523	Entospletinib (GS-9973)	d11	L2000-06	Syk	Angiogenesis	Entospletinib (GS-9973) is an orally bioavailable, selective Syk inhibitor with IC50 of 7.7 nM in a cell-free assay and showed 13- to >1000-fold cellular selectivity for Syk over other kinases(including Jak2, ckit, Flt3, Ret, KDR) as assessed by target protein phosphorylation or functional response.	411.46	1229208-44-9	26	63.1896	<1		http://selleckchem.com/products/gs-9973.html	C23H21N7O	free base	N/A	C1CN(CCO1)C2=CC=C(NC3=NC(=C[N]4C=CN=C34)C5=CC=C6C=N[NH]C6=C5)C=C2	2.949	4	2	4
S7530	Vactosertib ?(TEW-7197)	e11	L2000-06	TGF-beta/Smad	TGF-beta/Smad	Vactosertib ?(TEW-7197) is a highly potent, selective, and orally bioavailable TGF-β receptor ALK4/ALK5 inhibitor with IC50 of 13 nM and 11 nM, respectively. Phase 1.	399.42	1352608-82-2	79	197.787	<1		http://selleckchem.com/products/ew-7197.html	C22H18FN7	free base	N/A	CC1=NC(=CC=C1)C2=C(N=C(CNC3=CC=CC=C3F)[NH]2)C4=C[N]5N=CN=C5C=C4	3.621	4	2	5
S7540	SB273005	f11	L2000-06	Integrin	Cytoskeletal Signaling	SB273005 is a potent integrin inhibitor with Ki of 1.2 nM and 0.3 nM for αvβ3 receptor and αvβ5 receptor, respectively.	451.44	205678-31-5	90	199.362	<1		http://selleckchem.com/products/sb273005.html	C22H24F3N3O4	free base	N/A	CNC1=CC=CC(=N1)CCOC2=CC=C3CC(CC(O)=O)C(=O)N(CC3=C2)CC(F)(F)F	3.364	4	1	9
S7541	Decernotinib (VX-509)	g11	L2000-06	JAK	JAK/STAT	Decernotinib (VX-509) is a potent and selective JAK3 inhibitor with Ki of 2.5 nM, >4-fold selectivity over JAK1, JAK2, and TYK2, respectively. Phase 2/3.	392.38	944842-54-0	78	198.787	<1		http://selleckchem.com/products/decernotinib-vx-509.html	C18H19F3N6O	free base	N/A	CCC(C)(NC1=NC(=NC=C1)C2=C[NH]C3=NC=CC=C23)C(=O)NCC(F)(F)F	2.747	4	3	7
S7546	Pritelivir (BAY 57-1293)	h11	L2000-06	DNA/RNA Synthesis	DNA Damage	Pritelivir (BAY 57-1293) is a potent helicase primase inhibitor, exhibiting antiviral effect on herpes simplex virus (HSV) with IC50 of 20 nM for both HSV-1 and HSV-2.	402.49	348086-71-5	80	198.763	<1		http://selleckchem.com/products/bay-57-1293.html	C18H18N4O3S2	free base	AIC316	CN(C(=O)CC1=CC=C(C=C1)C2=NC=CC=C2)C3=NC(=C(S3)[S](N)(=O)=O)C	1.761	5	1	5
S7549	THZ1 2HCl	a2	L2000-07	CDK	Cell Cycle	THZ1 is a covalent CDK7 inhibitor which has the unprecedented ability to target a remote cysteine residue located outside of the canonical kinase domain, providing an unanticipated means of achieving selectivity for CDK7.	638.97	1604810-83-4(free base)	100	156.502	<1		http://selleckchem.com/products/thz1.html	C31H30Cl3N7O2	dihydrochloride	N/A	Cl.Cl.CN(C)C/C=C/C(=O)NC1=CC=C(C=C1)C(=O)NC2=CC=CC(=C2)NC3=NC=C(Cl)C(=N3)C4=C[NH]C5=C4C=CC=C5	6.383	4	4	9
S7553	GDC-0623	b2	L2000-07	MEK	MAPK	GDC-0623 is a potent and ATP-uncompetitive MEK1 inhibitor with Ki of 0.13 nM. Phase 1.	456.21	1168091-68-6	91	199.47	<1		http://selleckchem.com/products/gdc-0623.html	C16H14FIN4O3	free base	G-868	OCCONC(=O)C1=C(NC2=C(F)C=C(I)C=C2)[N]3C=NC=C3C=C1	2.284	3	3	6
S7555	4SC-202	c2	L2000-07	HDAC	Epigenetics	4SC-202 is a selective class I HDAC inhibitor with IC50 of 1.20 μM, 1.12 μM, and 0.57 μM for HDAC1, HDAC2, and HDAC3, respectively. Also displays inhibitory activity against Lysine specific demethylase 1 (LSD1). Phase 1.	447.51	910462-43-0	89	198.878	<1		http://selleckchem.com/products/4sc-202.html	C23H21N5O3S	free base	N/A	C[N]1C=C(C=N1)C2=CC=C(C=C2)[S](=O)(=O)[N]3C=CC(=C3)\C=C\C(=O)NC4=CC=CC=C4N	2.955	4	2	6
S7557	CL-387785 (EKI-785)	d2	L2000-07	EGFR	Protein Tyrosine Kinase	CL-387785 (EKI-785) is an irreversible, and selective EGFR inhibitor with IC50 of 370 pM.	381.23	194423-06-8	63	165.255	<1		http://selleckchem.com/products/cl-387785-eki-785.html	C18H13BrN4O	free base	N/A	CC#CC(=O)NC1=CC2=C(NC3=CC=CC(=C3)Br)N=CN=C2C=C1	4.568	3	2	4
S7563	AT13148	e2	L2000-07	Akt,S6 Kinase,ROCK,PKA	PI3K/Akt/mTOR	AT13148 is an oral, ATP-competitive, multi-AGC kinase inhibitor with IC50 of 38 nM/402 nM/50 nM, 8 nM, 3 nM, and 6 nM/4 nM for Akt1/2/3, p70S6K, PKA, and ROCKI/II, respectively. Phase 1.	313.78	1056901-62-2	62	197.591	<1		http://selleckchem.com/products/at13148.html	C17H16ClN3O	free base	N/A	NCC(O)(C1=CC=C(Cl)C=C1)C2=CC=C(C=C2)C3=C[NH]N=C3	2.491	1	2	4
S7564	SAR125844	f2	L2000-07	c-Met	Protein Tyrosine Kinase	SAR125844 is a potent intravenously active and highly selective <b>MET</b> kinase inhibitor, displaying nanomolar activity against the wild-type kinase (IC50 value of 4.2 nmol/L) and H1094Y, Y1235D, M1250T, L1195V, and D1228H kinase domain mutants (IC50 values of 0.22, 1.7, 6.5, 65, and 81 nmol/L, respectively).	550.63	1116743-46-4	11	19.9771	<1		http://www.selleck.cn/products/sar125844.html	C25H23FN8O2S2_x000D_	free base	N/A	FC1=CC=C(C=C1)C2=N[N]3C(=NN=C3C=C2)SC4=CC=C5N=C(NC(=O)NCCN6CCOCC6)SC5=C4	4.518	6	2	7
S7582	Anacardic Acid	g2	L2000-07	Histone Acetyltransferase	Epigenetics	Anacardic Acid is a potent inhibitor of p300 and p300/CBP-associated factor histone acetyltranferases, which also has antibacterial activity, antimicrobial activity, prostaglandin synthase inhibition, and tyrosinase and lipoxygenase inhibition.	348.52	16611-84-0	69	197.98	<1		http://selleckchem.com/products/anacardic-acid.html	C22H36O3	free base	6-pentadecylsalicylic Acid	CCCCCCCCCCCCCCCC1=CC=CC(=C1C(O)=O)O	8.09	1	1	15
S7585	SB-334867	h2	L2000-07	OX Receptor	GPCR & G Protein	SB-334867 is a selective orexin-1 (OX1) receptor antagonist.	319.32	792173-99-0	63	197.294	<1		http://selleckchem.com/products/sb-334867.html	C17H13N5O2	free base	N/A	CC1=NC2=C(O1)C=C(NC(=O)NC3=CC=NC4=CC=CN=C34)C=C2	1.773	5	2	2
S7589	N6022	a3	L2000-07	Others	Others	N6022 is a selective, and reversible inhibitor of S-nitrosoglutathione reductase (GSNOR) with IC50 of 8 nM and Ki of 2.5 nM. Phase 1/2.	414.46	1208315-24-5	82	197.848	<1		http://selleckchem.com/products/n6022.html	C24H22N4O3	free base	N/A	CC1=C(C=CC(=C1)C(N)=O)[N]2C(=CC=C2C3=CC=C(C=C3)[N]4C=CN=C4)CCC(O)=O	3.664	3	1	7
S7605	Filgotinib (GLPG0634)	b3	L2000-07	JAK	JAK/STAT	Filgotinib (GLPG0634) is a selective JAK1 inhibitor with IC50 of 10 nM, 28 nM, 810 nM, and 116 nM for JAK1, JAK2, JAK3, and TYK2, respectively. Phase 2.	425.5	1206161-97-8	85	199.765	<1		http://selleckchem.com/products/filgotinib.html	C21H23N5O3S	free base	N/A	O=C(NC1=N[N]2C(=N1)C=CC=C2C3=CC=C(CN4CC[S](=O)(=O)CC4)C=C3)C5CC5	2.461	5	1	5
S7608	UM171	c3	L2000-07	Others	Others	UM171 is a potent agonist of human hematopoietic stem cell renewal, independently of AhR suppression.	453.54	1448724-09-1	45	99.2195	<1		http://selleckchem.com/products/um171.html	C25H27N9	free base	N/A	C[N]1N=NC(=N1)C2=CC=C3C(=C2)[NH]C4=C3C(=NC(=N4)CC5=CC=CC=C5)NC6CCC(N)CC6	3.753	5	3	5
S7612	PX-478 2HCl	d3	L2000-07	HIF	Angiogenesis	PX-478 2HCl is an orally active, and selective hypoxia-inducible factor-1α (HIF-1α) inhibitor. Phase 1.	394.12	685898-44-6	78	197.909	78	197.909	http://selleckchem.com/products/px-478-2hcl.html	C13H20Cl4N2O3	dihydrochloride	N/A	Cl.Cl.NC(CC1=CC=C(C=C1)[N+]([O-])(CCCl)CCCl)C(O)=O	-0.251	1	1	8
S7616	CPI-169	e3	L2000-07	Histone Methyltransferase	Epigenetics	CPI-169 is a potent, and selective EZH2 inhibitor with IC50 of 0.24 nM, 0.51 nM, and 6.1 nM for EZH2 WT, EZH2 Y641N, and EZH1, respectively.	528.66	1450655-76-1	100	189.157	<1		http://selleckchem.com/products/cpi-169.html	C27H36N4O5S	free base	N/A	CC[S](=O)(=O)N1CCC(CC1)C(C)[N]2C(=C(C(=O)NCC3=C(OC)C=C(C)NC3=O)C4=CC=CC=C24)C	1.74	5	2	8
S7617	Tasquinimod	f3	L2000-07	HDAC	Angiogenesis	Tasquinimod is an orally active antiangiogenic agent by allosterically inhibiting HDAC4 signalling. Phase 3.	406.36	254964-60-8	81	199.331	<1		http://selleckchem.com/products/tasquinimod.html	C20H17F3N2O4	free base	ABR-215050	COC1=C2C(=C(C(=O)N(C)C3=CC=C(C=C3)C(F)(F)F)C(=O)N(C)C2=CC=C1)O	2.797	3	1	4
S7618	MI-2 (Menin-MLL Inhibitor)	g3	L2000-07	Histone Methyltransferase	Epigenetics	MI-2 (Menin-MLL Inhibitor) is a potent menin-MLL interaction inhibitor with IC50 of 446 nM.	375.55	1271738-62-5	75	199.707	<1		http://selleckchem.com/products/mi-2-menin-mll-inhibitor.html	C18H25N5S2	free base	N/A	CCCC1=CC2=C(N=CN=C2S1)N3CCN(CC3)C4=NCC(C)(C)S4	4.161	3	0	4
S7624	SD-208	h3	L2000-07	TGF-beta/Smad	TGF-beta/Smad	SD-208 is a selective TGF-βRI (ALK5) inhibitor with IC50 of 48 nM, >100-fold selectivity over TGF-βRII.	352.75	627536-09-8	9	25.5138	<1		http://selleckchem.com/products/sd-208.html	C17H10ClFN6	free base	N/A	FC1=CC=C(Cl)C=C1C2=NC3=NC=CN=C3C(=N2)NC4=CC=NC=C4	3.139	5	1	3
S7634	Cerdulatinib (PRT062070, PRT2070)	a4	L2000-07	JAK	JAK/STAT	Cerdulatinib (PRT-062070) is an oral active, multi-targeted tyrosine kinase inhibitor with IC50 of 12 nM/6 nM/8 nM/0.5 nM and 32 nM for JAK1/JAK2/JAK3/TYK2 and Syk, respectively. Also inhibits 19 other tested kinases with IC50 less than 200 nM.	482	1369761-01-2	43	89.2116	<1		http://selleckchem.com/products/cerdulatinib-prt062070-prt2070.html	C20H28ClN7O3S	Hydrochloride	N/A	Cl.CC[S](=O)(=O)N1CCN(CC1)C2=CC=C(NC3=NC(=C(C=N3)C(N)=O)NC4CC4)C=C2	1.862	5	3	8
S7636	SU9516	b4	L2000-07	CDK	Cell Cycle	SU 9516 is a 3-substituted indolinone CDK inhibitor with IC50 of 22 nM, 40 nM, and 200 nM for CDK2, CDK1, and CDK4, respectively.	241.25	377090-84-1	48	198.964	<1		http://selleckchem.com/products/su9516.html	C13H11N3O2	free base	N/A	COC1=CC=C2NC(=O)C(=C\C3=CN=C[NH]3)/C2=C1	0.893	3	2	2
S7637	DTP3	c4	L2000-07	JNK	MAPK	DTP3 is a selective GADD45β/MKK7 inhibitor, which inhibits cancer-selective NF-κB survival pathway.	525.6	1809784-29-9	100	190.259	100	190.259	http://selleckchem.com/products/dtp3.html	C26H35N7O5	free base	N/A	CC(=O)NC(CC1=CC=C(O)C=C1)C(=O)NC(CCCNC(N)=N)C(=O)NC(CC2=CC=CC=C2)C(N)=O	0	4	7	15
S7639	3PO	d4	L2000-07	phosphatase	Others	3PO is a small-molecule inhibitor of PFKFB3 with an IC50 of 22.9 μM for recombinant human PFKFB3 protein and does not inhibit PFK-1 activity. It suppresses glucose uptake, and decreases the intracellular concentration of Fru-2,6-BP, lactate, ATP, NAD+, and NADH.	210.23	18550-98-6	42	199.781	<1		http://selleckchem.com/products/3po.html	C13H10N2O	free base	3-(3-pyridinyl)-1-(4-pyridinyl)-2-propen-1-one	O=C(/C=C/C1=CC=CN=C1)C2=CC=NC=C2	1.4	3	0	3
S7645	Pilaralisib (XL147)	e4	L2000-07	PI3K	PI3K/Akt/mTOR	Pilaralisib (XL147) is a selective and reversible class I PI3K inhibitor for PI3Kα/δ/γ with IC50 of 39 nM/36 nM/23 nM in cell-free assays, less potent to PI3Kβ. Phase 1/2.	541.02	934526-89-3	100	184.836	<1		http://selleckchem.com/products/pilaralisib-xl147.html	C25H25ClN6O4S	free base	N/A	COC1=CC(=C(Cl)C=C1)NC2=NC3=CC=CC=C3N=C2N[S](=O)(=O)C4=CC=CC(=C4)NC(=O)C(C)(C)N	4.012	6	4	8
S7646	Voxtalisib (XL765, SAR245409)	f4	L2000-07	mTOR,PI3K	Angiogenesis	Voxtalisib (SAR245409, XL765) is a dual inhibitor of mTOR/PI3K, mostly for p110γ with IC50 of 9 nM also inhibits DNA-PK and mTOR. Phase 1/2.	270.29	934493-76-2	54	199.785	<1		http://selleckchem.com/products/voxtalisib-xl765-sar245409.html	C13H14N6O	free base	N/A	CCN1C(=O)C(=CC2=C(C)N=C(N)N=C12)C3=CC=N[NH]3	0.838	4	2	2
S7648	OTS964	g4	L2000-07	TOPK	MAPK	OTS964 is a potent TOPK inhibitor with high affinity and selectivity and IC50 value is 28 nM.	428.97	1338545-07-5	85	198.149	<1		http://selleckchem.com/products/ots964.html	C23H26Cl2N2O2S	dihydrochloride	N/A	Cl.Cl.CC(CN(C)C)C1=CC=C(C=C1)C2=C3C(=C(C)C=C2O)NC(=O)C4=C3C=CS4	5.497	1	2	4
S7649	MI-773 (SAR405838)	h4	L2000-07	p53,Mdm2	Apoptosis	MI-773 (SAR405838) is an orally available MDM2 antagonist with Ki of 0.88 nM. Phase 1.	562.5	1303607-60-4	100	177.778	<1		http://selleckchem.com/products/mi-773-sar405838.html	C29H34Cl2FN3O3	free base	N/A	CC(C)(C)CC1NC(C(C2=CC=CC(=C2F)Cl)C13C(=O)NC4=C3C=CC(=C4)Cl)C(=O)NC5CCC(O)CC5	4.856	2	4	5
S7651	SB225002	a5	L2000-07	CXCR	GPCR & G Protein	SB225002 is a potent, and selective CXCR2 antagonist with IC50 of 22 nM for inhibiting interleukin IL-8 binding to CXCR2, > 150-fold selectivity over the other 7-TMRs tested.	352.14	182498-32-4	70	198.785	<1		http://selleckchem.com/products/sb225002.html	C13H10BrN3O4	free base	N/A	OC1=CC(=CC=C1NC(=O)NC2=C(Br)C=CC=C2)[N+]([O-])=O	2.923	1	3	3
S7652	OTS514 hydrochloride	b5	L2000-07	TOPK	MAPK	OTS514 is a highly potent TOPK(T-LAK cell-originated protein kinase) inhibitor with an IC50 value of 2.6 nM.	400.92	1338540-63-8(free base)	80	199.541	80	199.541	http://selleckchem.com/products/ots514.html	C21H21ClN2O2S	hydrochloride	N/A	Cl.CC(CN)C1=CC=C(C=C1)C2=C3C(=C(C)C=C2O)NC(=O)C4=C3C=CS4	4.147	1	3	3
S7653	PND-1186 (VS-4718)	c5	L2000-07	FAK	Angiogenesis	PND-1186 (VS-4718) is a reversible and selective FAK inhibitor with IC50 of 1.5 nM. Phase 1.	501.5	1061353-68-1	24	47.8564	<1		http://selleckchem.com/products/pnd-1186-vs-4718.html	C25H26F3N5O3	free base	SR-2156	CNC(=O)C1=CC=CC=C1NC2=CC(=NC=C2C(F)(F)F)NC3=CC=C(C=C3OC)N4CCOCC4	4.302	4	3	8
S7655	CB-839	d5	L2000-07	Glutaminase	Proteases	CB-839 is a potent, selective, and orally bioavailable glutaminase inhibitor with IC50 of 24 nM for recombinant human GAC. Phase 1.	571.57	1439399-58-2	100	174.957	<1		http://selleckchem.com/products/cb-839.html	C26H24F3N7O3S	free base	N/A	FC(F)(F)OC1=CC(=CC=C1)CC(=O)NC2=CC=C(CCCCC3=NN=C(NC(=O)CC4=CC=CC=N4)S3)N=N2	5.597	8	2	13
S7656	CPI-360	e5	L2000-07	Histone Methyltransferase	Epigenetics	CPI-360 is a potent, selective,and SAM-competitive EZH1 inhibitor with IC50 of 102.3 nM, >100-fold selectivity over other methyltransferases.	437.53	1802175-06-9	20	45.7112	<1		http://selleckchem.com/products/cpi-360.html	C25H31N3O4	free base	N/A	COC1=C(CNC(=O)C2=C(C)[N](C(C)C3CCOCC3)C4=C2C=CC=C4)C(=O)NC(=C1)C	2.071	4	2	6
S7665	CH5183284 (Debio-1347)	f5	L2000-07	FGFR	Angiogenesis	CH5183284 is a selective and orally available FGFR inhibitor with IC50 of 9.3 nM, 7.6 nM, 22 nM, and 290 nM for FGFR1, FGFR2, FGFR3, and FGFR4, respectively. Phase 1.	356.38	1265229-25-1	71	199.226	<1		http://selleckchem.com/products/ch5183284-debio-1347.html	C20H16N6O	free base	FF284	CC1=NC2=C([NH]1)C=C(C=C2)[N]3N=CC(=C3N)C(=O)C4=CC5=C([NH]4)C=CC=C5	3.199	3	3	3
S7667	SU5402	g5	L2000-07	FGFR,VEGFR	Protein Tyrosine Kinase	SU5402 is a potent multi-targeted receptor tyrosine kinase inhibitor with IC50 of 20 nM, 30 nM, and 510 nM for VEGFR2, FGFR1, and PDGF-Rβ, respectively.	296.32	215543-92-3	59	199.109	<1		http://selleckchem.com/products/su5402.html	C17H16N2O3	free base	N/A	CC1=C[NH]C(=C1CCC(O)=O)C=C2C(=O)NC3=C2C=CC=C3	2.723	2	2	4
S7672	Omaveloxolone (RTA-408)	h5	L2000-07	NF-κB	NF-κB	Omaveloxolone (RTA-408) is a synthetic triterpenoid that activates the cytoprotective transcription factor Nrf2 and inhibits NF-κB signaling. Phase 2.	554.71	1474034-05-3	100	180.274	<1		http://selleckchem.com/products/omaveloxolone-rta-408.html	C33H44F2N2O3	free base	N/A	CC1(C)CCC2(CCC3(C)C(C2C1)C(=O)C=C4C3(C)CCC5C(C)(C)C(=O)C(=CC45C)C#N)NC(=O)C(C)(F)F	5.339	3	1	2
S7674	Savolitinib(AZD6094, HMPL-504)	a6	L2000-07	c-Met	Protein Tyrosine Kinase	Savolitinib (volitinib, AZD6094, HMPL-504) is a novel, potent, and selective MET inhibitor currently in clinical development in various indications, including PRCC. The IC50 values of this compound for c-Met and p-Met are 5 nM and 3 nM, respectively. It shows exquisite selectivity for c-Met over 274 kinase.	345.36	1313725-88-0	16	46.3285	<1		http://selleckchem.com/products/hmpl-504-azd6094-volitinib.html	C17H15N9	free base	Volitinib	CC([N]1N=NC2=NC=C(N=C12)C3=C[N](C)N=C3)C4=C[N]5C=CN=C5C=C4	1.032	6	0	3
S7684	Salirasib	b6	L2000-07	Rho	Cell Cycle	Salirasib is a potent competitive prenylated protein methyltransferase (PPMTase) inhibitor with Ki of 2.6 μM, which inhibits Ras methylation. Phase 2.	358.54	162520-00-5	The physical form of the compound is fat, and can be dissolved in any proportion in DMSO				http://selleckchem.com/products/salirasib.html	C22H30O2S	free base	Farnesylthiosalicylic acid, FTS	CC(C)=CCC/C(C)=C/CC/C(C)=C/CSC1=CC=CC=C1C(O)=O	7.12	1	0	10
S7686	ML141	c6	L2000-07	Rho	Cell Cycle	ML141 (CID-2950007), is demonstrated to be a potent, selective and reversible non-competitive inhibitor of Cdc42 GTPase suitable for in vitro assays, with IC50 of 200 nM and selectivity against other members of the Rho family of GTPases (Rac1, Rab2, Rab7).	407.49	71203-35-5	81	198.778	<1		http://selleckchem.com/products/ml141.html	C22H21N3O3S	free base	CID-2950007	COC1=CC=C(C=C1)C2CC(=NN2C3=CC=C(C=C3)[S](N)(=O)=O)C4=CC=CC=C4	3.87	4	1	5
S7691	PS-1145	d6	L2000-07	IκB/IKK	NF-κB	PS-1145 is a specific IKK inhibitor with IC50 of 88 nM.	322.75	431898-65-6	64	198.296	<1		http://selleckchem.com/products/ps-1145.html	C17H11ClN4O	free base	N/A	ClC1=CC(=C2[NH]C3=C(C=CN=C3)C2=C1)NC(=O)C4=CN=CC=C4	2.471	3	2	2
S7693	AZD6738	e6	L2000-07	ATM/ATR	PI3K/Akt/mTOR	AZD6738 is an orally active, and selective ATR kinase inhibitor with IC50 of 1 nM. Phase 1/2.	412.51	1352226-88-0	82	198.783	<1		http://selleckchem.com/products/azd6738.html	C20H24N6O2S	free base	N/A	CC1COCCN1C2=NC(=NC(=C2)C3(CC3)[S](C)(=N)=O)C4=C5C=C[NH]C5=NC=C4	2.427	5	1	4
S7694	AZD8186	f6	L2000-07	PI3K	PI3K/Akt/mTOR	AZD8186 is a potent and selective inhibitor of PI3Kβ and PI3Kδ with IC50 of 4 nM and 12 nM, respectively. Phase 1.	457.47	1627494-13-6	91	198.92	<1		http://selleckchem.com/products/azd8186.html	C24H25F2N3O4	free base	N/A	CC(NC1=CC(=CC(=C1)F)F)C2=CC(=CC3=C2OC(=CC3=O)N4CCOCC4)C(=O)N(C)C	3.418	4	1	5
S7704	LY2584702 Tosylate	g6	L2000-07	S6 Kinase	PI3K/Akt/mTOR	LY2584702 Tosylate is a selective, ATP-competitive <B>p70S6K inhibitor with IC50 of 4 nM. Phase 1.	617.62	1082949-68-5	7	11.3338	<1		http://selleckchem.com/products/ly2584702-tosylate.html	C28H27F4N7O3S	free base	N/A	C[N]1C=C(N=C1C2CCN(CC2)C3=NC=NC4=C3C=N[NH]4)C5=CC(=C(F)C=C5)C(F)(F)F.CC6=CC=C(C=C6)[S](O)(=O)=O	5.829	4	1	5
S7707	Verdinexor (KPT-335)	h6	L2000-07	CRM1	Transmembrane Transporters	Verdinexor (KPT-335) is an orally bioavailable, selective XPO1/CRM1 inhibitor.	442.32	1392136-43-4	88	198.951	<1		http://selleckchem.com/products/verdinexor-kpt-335.html	C18H12F6N6O	free base	N/A	FC(F)(F)C1=CC(=CC(=C1)C(F)(F)F)C2=N[N](\C=C/C(=O)NNC3=CC=CC=N3)C=N2	3.496	4	2	7
S7723	PRIMA-1	a7	L2000-07	p53	Apoptosis	PRIMA-1 is a mutant p53 reactivator. It induces apoptosis and inhibits growth of human tumors with mutant p53.	185.22	5608-24-2	37	199.762	37	199.762	http://selleckchem.com/products/prima-1.html	C9H15NO3	free base	2,2-Bis(hydroxymethyl)-3-quinuclidinone	OCC1(CO)N2CCC(CC2)C1=O	-0.772	1	2	2
S7724	APR-246 (PRIMA-1MET)	b7	L2000-07	p53	Apoptosis	APR-246, also known as PRIMA-1MET, is a small organic molecule that has been shown to restore tumour-suppressor function primarily to mutant p53 and also to induce cell death in various cancer types.	199.25	5291-32-7	40	200.753			http://selleckchem.com/products/apr-246-prima-1met.html	C10H17NO3	free base	N/A	COCC1(CO)N2CCC(CC2)C1=O	-0.364	2	1	3
S7725	BLZ945	c7	L2000-07	CSF-1R	Protein Tyrosine Kinase	BLZ945 is an orally active, potent and selective CSF-1R inhibitor with IC50 of 1 nM, >1000-fold selective against its closest receptor tyrosine kinase homologs.	398.48	953769-46-5	79	198.253	<1		http://selleckchem.com/products/blz945.html	C20H22N4O3S	free base	N/A	CNC(=O)C1=NC=CC(=C1)OC2=CC3=C(C=C2)N=C(NC4CCCCC4O)S3	3.201	4	3	5
S7730	NU1025	d7	L2000-07	PARP	DNA Damage	NU1025 is a potent PARP inhibitor with IC50 of 400 nM.	176.17	90417-38-2	35	198.672	<1		http://selleckchem.com/products/nu1025.html	C9H8N2O2	free base	NSC 696807	CC1=NC2=C(C=CC=C2O)C(=O)N1	0.587	2	2	0
S7731	AZD3839	e7	L2000-07	BACE	Neuronal Signaling	AZD3839 is a potent and selective BACE1 inhibitor with Ki of 26.1 nM, about 14-fold selectivity over BACE2. Phase 1.	431.41	1227163-84-9	86	199.346	<1		http://selleckchem.com/products/azd3839.html	C24H16F3N5	free base	N/A	NC1=NC(C2=CC=CC(=C2)C3=CN=CN=C3)(C4=CC(=NC=C4)C(F)F)C5=CC=CC(=C15)F	3.574	4	1	4
S7734	LFM-A13	f7	L2000-07	BTK	Angiogenesis	LFM-A13 is a specific Bruton's tyrosine kinase (BTK) inhibitor with IC50 of 2.5 μM, >100-fold selectivity over other protein kinases including JAK1, JAK2, HCK, EGFR,and IRK.	360	244240-24-2	72	200	<1		http://selleckchem.com/products/lfm-a13.html	C11H8Br2N2O2	free base	N/A	C/C(O)=C(C#N)/C(=O)NC1=C(Br)C=CC(=C1)Br	2.645	1	2	2
S7738	PRT-060318 2HCl	g7	L2000-07	Syk	Angiogenesis	PRT-060318 (PRT318) is a novel selective inhibitor of the Syk tyrosine kinase with an IC50 of 4 nM, as an approach to HIT treatment.	413.34	1194961-19-7 (free base)	75	181.449	75	181.449	http://selleckchem.com/products/prt-060318-prt318-3hcl.html	C18H27Cl3N6O	Dihydrochloride	PRT318	Cl.Cl.CC1=CC(=CC=C1)NC2=C(C=NC(=N2)NC3CCCCC3N)C(N)=O	3.706	3	4	5
S7741	SB239063	h7	L2000-07	p38 MAPK	MAPK	SB239063 is a potent and selective p38 MAPKα/β inhibitor with IC50 of 44 nM, showing no activity against the γ- and δ-kinase isoforms.	368.4	193551-21-2	60	162.866	<1		http://selleckchem.com/products/sb239063.html	C20H21FN4O2	free base	N/A	COC1=NC=CC(=N1)C2=C(N=C[N]2C3CCC(O)CC3)C4=CC=C(F)C=C4	3.661	4	1	4
S7748	EPZ015666(GSK3235025)	a8	L2000-07	Histone Methyltransferase	Epigenetics	EPZ015666(GSK3235025) is a potent, selective and orally bioavailable PRMT5 inhibitor with Ki of 5 nM, >20,000-fold selectivity over other PMTs.	383.44	1616391-65-1	60	156.478	<1		http://selleckchem.com/products/epz015666.html	C20H25N5O3	free base	GSK3235025	OC(CNC(=O)C1=CC(=NC=N1)NC2COC2)CN3CCC4=C(C3)C=CC=C4	1.038	4	3	7
S7750	KNK437	b8	L2000-07	HSP (e.g. HSP90)	Cell Cycle	KNK437 is a pan-HSP inhibitor, which inhibits the synthesis of inducible HSPs, including HSP105, HSP72, and HSP40.	245.23	218924-25-5	15	61.1671	<1		http://selleckchem.com/products/knk437.html	C13H11NO4	free base	N/A	O=CN1CCC(=C/C2=CC3=C(OCO3)C=C2)/C1=O	1.22	4	0	1
S7757	6-Thio-dG	c8	L2000-07	DNA/RNA Synthesis	DNA Damage	6-thio-dG is a nucleoside analog and telomerase substrate.	283.31	789-61-7	56	197.663	<1		http://selleckchem.com/products/6-thio-dg.html	C10H13N5O3S	free base	N/A	NC1=NC(=S)C2=C(N1)[N](C=N2)C3CC(O)C(CO)O3	-0.714	3	4	2
S7762	TRx0237 (LMTX) mesylate	d8	L2000-07	Microtubule Associated	Cytoskeletal Signaling	TRx 0237 (LMTX?) mesylate is a second-generation tau protein aggregation inhibitor for the treatment of Alzheimer's disease (AD) and frontotemporal dementia.	477.62	1236208-20-0	95	198.903	95	198.903	http://selleckchem.com/products/trx0237-lmtx-mesylate.html	C18H27N3O6S3	Dimesylate	N/A	C[NH+](C)C1=CC=C2NC3=C(SC2=C1)C=C(C=C3)[NH+](C)C.C[S]([O-])(=O)=O.C[S]([O-])(=O)=O	-4.637	0	1	2
S7765	Dovitinib (TKI258) Lactate	e8	L2000-07	FLT3,c-Kit,FGFR,PDGFR,VEGFR	Angiogenesis	Dovitinib (TKI258) Lactate is the Lactate of Dovitinib, which is a multitargeted RTK inhibitor, mostly for class III (FLT3/c-Kit) with IC50 of 1 nM/2 nM, also potent to class IV (FGFR1/3) and class V (VEGFR1-4) RTKs with IC50 of 8-13 nM, less potent to InsR, EGFR, c-Met, EphA2, Tie2, IGFR1 and HER2. Phase 4.	482.51	915769-50-5	100	207.25	66	136.785	http://selleckchem.com/products/dovitinib-tki258-lactate.html	C24H27FN6O4	Lactate	N/A	CC(O)C(O)=O.CN1CCN(CC1)C2=CC3=C(C=C2)N=C([NH]3)C4=C(N)C5=C(NC4=O)C=CC=C5F	-1.646	3	4	3
S7766	Cabotegravir (GSK744, GSK1265744)	f8	L2000-07	Integrase	Microbiology	Cabotegravir (GSK744, GSK1265744) is a long-acting HIV integrase inhibitor against a broad range of HIV subtypes, and inhibits the HIV-1 integrase catalyzed strand transfer reaction with IC50 of 3.0 nM. Phase 2.	405.35	1051375-10-0	38	93.7461	<1		http://selleckchem.com/products/cabotegravir-gsk744-gsk1265744.html	C19H17F2N3O5	free base	N/A	CC1COC2CN3C=C(C(=O)NCC4=C(F)C=C(F)C=C4)C(=O)C(=C3C(=O)N12)O	0.237	4	2	3
S7772	Elacridar (GF120918)	g8	L2000-07	P-gp	Transmembrane Transporters	Elacridar (GF120918) is a potent P-gp (MDR-1) and BCRP inhibitor.	563.64	143664-11-3	8	14.1935	<1		http://selleckchem.com/products/elacridar-gf120918.html	C34H33N3O5	free base	GW120918	COC1=C2NC3=C(C=CC=C3C(=O)NC4=CC=C(CCN5CCC6=C(C5)C=C(OC)C(=C6)OC)C=C4)C(=O)C2=CC=C1	5.742	5	2	8
S7775	Emricasan	h8	L2000-07	Caspase	Apoptosis	Emricasan is a potent irreversible pan-caspase inhibitor.	569.5	254750-02-2	100	175.593	<1		http://selleckchem.com/products/emricasan-idn-6556-pf-03491390.html	C26H27F4N3O7	free base	IDN-6556, PF 03491390, PF-03491390	CC(NC(=O)C(=O)NC1=C(C=CC=C1)C(C)(C)C)C(=O)NC(CC(O)=O)C(=O)COC2=C(F)C(=CC(=C2F)F)F	3.017	6	3	12
S7777	Coelenterazine	a9	L2000-07	Others	Others	Coelenterazine is a luminescent enzyme substrate, used for monitoring reporter genes in BRET, ELISA and HTS techniques.	423.46	55779-48-1	84	198.366	<1		http://selleckchem.com/products/coelenterazine.html	C26H21N3O3	free base	N/A	OC1=CC=C(CC2=NC3=C(CC4=CC=CC=C4)NC(=CN3C2=O)C5=CC=C(O)C=C5)C=C1	3.404	2	3	5
S7792	SRT2104 (GSK2245840)	b9	L2000-07	Sirtuin	DNA Damage	SRT2104 (GSK2245840) is a selective SIRT1 activator involved in the regulation of energy homeostasis. Phase 2.	516.64	1093403-33-8	16	30.9693	<1		http://selleckchem.com/products/srt2104-gsk2245840.html	C26H24N6O2S2	free base	N/A	CC1=C(SC(=N1)C2=CC=CN=C2)C(=O)NC3=C(C=CC=C3)C4=C[N]5C(=CSC5=N4)CN6CCOCC6	2.813	5	1	6
S7795	ORY-1001 (RG-6016) 2HCl	c9	L2000-07	Histone Demethylase	Epigenetics	ORY-1001 (RG-6016) 2HCl is an orally active and selective lysine-specific demethylase LSD1/KDM1A inhibitor with IC50 of <20 nM, with high selectivity against related FAD dependent aminoxidases. Phase 1.	303.27	1431326-61-2	5	16.487	61	201.141	http://selleckchem.com/products/ory-1001-rg-6016.html	C15H24Cl2N2	dihydrochloride	N/A	Cl.Cl.NC1CCC(CC1)NC2CC2C3=CC=CC=C3	2.721	0	2	3
S7796	GSK2879552 2HCl	d9	L2000-07	Histone Demethylase	Epigenetics	GSK2879552 2HCl is a potent, selective, orally bioavailable, irreversible LSD1 inhibitor with Kiapp of 1.7 μM. Phase 1.	437.4	1401966-69-5 (free base)	29	66.3009	44	100.594	http://selleckchem.com/products/gsk2879552-2hcl.html	C23H30Cl2N2O2	dihydrochloride	N/A	Cl.Cl.OC(=O)C1=CC=C(CN2CCC(CC2)CNC3CC3C4=CC=CC=C4)C=C1	1.586	1	1	7
S7799	Pexmetinib (ARRY-614)	e9	L2000-07	p38 MAPK,Tie-2	MAPK	Pexmetinib (ARRY-614) is a potent, orally bioavailable, dual p38 MAPK/Tie-2 inhibitor with IC50 of 4 nM/18 nM in a HEK-293 cell line. Phase 1.	556.63	945614-12-0	100	179.653	<1		http://selleckchem.com/products/pexmetinib-arry-614.html	C31H33FN6O3	free base	N/A	CC1=CC=C(C=C1)[N]2N=C(C=C2NC(=O)NCC3=C(OC4=CC5=C(C=C4)[N](CCO)N=C5)C=CC(=C3)F)C(C)(C)C	6.271	4	3	9
S7808	AT7519 HCl	f9	L2000-07	CDK	Cell Cycle	AT7519 HCl is a multi-CDK inhibitor for CDK1, 2, 4, 6 and 9 with IC50 of 10-210 nM in cell-free assays. It is less potent to CDK3 and little active to CDK7. Phase 2.	418.71	902135-91-5	52	124.191	43	102.696	http://selleckchem.com/products/at7519-hcl.html	C16H18Cl3N5O2	Hydrochloride	N/A	Cl.ClC1=CC=CC(=C1C(=O)NC2=C[NH]N=C2C(=O)NC3CCNCC3)Cl	1.98	3	4	4
S7812	Itacitinib (INCB39110)	g9	L2000-07	JAK	JAK/STAT	Itacitinib(INCB39110) is an orally bioavailable inhibitor of Janus-associated kinase 1 (JAK1) with potential antineoplastic activity.	553.51	1334298-90-6	100	180.665	<1		http://selleckchem.com/products/itacitinib-incb39110.html	C26H23F4N9O	free base	N/A	FC1=C(C=CN=C1C(F)(F)F)C(=O)N2CCC(CC2)N3CC(CC#N)(C3)[N]4C=C(C=N4)C5=C6C=C[NH]C6=NC=N5	2.422	5	1	6
S7813	AMG319	h9	L2000-07	PI3K	PI3K/Akt/mTOR	AMG319 is a potent and selective PI3Kδ inhibitor with IC50 of 18 nM, >47-fold selectivity over other PI3Ks. Phase 2.	385.4	1608125-21-8	77	199.792	<1		http://selleckchem.com/products/amg319.html	C21H16FN7	free base	N/A	CC(NC1=C2N=C[NH]C2=NC=N1)C3=C(N=C4C=C(F)C=CC4=C3)C5=CC=CC=N5	3.691	5	2	4
S7816	MI-463	a10	L2000-07	Histone Methyltransferase	Epigenetics	MI-463 is a potent inhibitor of Menin-MLL interaction with an IC50 value of 15.3 nM.	484.54	1628317-18-9	96	198.126	<1		http://selleckchem.com/products/mi-463.html	C24H23F3N6S	free base	N/A	CC1=C2C=C([NH]C2=CC=C1CN3CCC(CC3)NC4=C5C=C(CC(F)(F)F)SC5=NC=N4)C#N	5.372	2	2	6
S7820	EPZ020411 2HCl	b10	L2000-07	Histone Methyltransferase	Epigenetics	EPZ020411 is a potent and selective small molecule PRMT6 inhibitor with an IC50 of 10 nM.	515.52	1700663-41-7(free base)	100	193.979	81	157.123	http://selleckchem.com/products/epz020411.html	C25H40Cl2N4O3	dihydrochloride	N/A	Cl.Cl.CNCCN(C)CC1=C[NH]N=C1C2=CC=C(OC3CC(C3)OCCC4CCOCC4)C=C2	3.322	4	2	12
S7824	Nazartinib (EGF816, NVS-816)	c10	L2000-07	EGFR	Angiogenesis	Nazartinib (EGF816, NVS-816) is a covalent, irreversible, mutant-selective EGFR inhibitor that has nanomolar inhibitory potency against activating mt (L858R, ex19del) and T790M mt, with up to 60-fold selectivity over wild type (wt) EGFR in vitro.	495.02	1508250-71-2	99	199.992	<1		http://selleckchem.com/products/nazartinib-egf816-nvs-816.html	C26H31ClN6O2	free base	N/A	CN(C)C/C=C/C(=O)N1CCCCC(C1)[N]2C(=NC3=CC=CC(=C23)Cl)NC(=O)C4=CC(=NC=C4)C	3.705	4	1	6
S7827	4-Hydroxytamoxifen	d10	L2000-07	Estrogen/progestogen Receptor	Endocrinology & Hormones	4-Hydroxytamoxifen is the active metabolite of tamoxifen and a selective estrogen receptor (ER) modulator that is widely used in the therapeutic and chemopreventive treatment of breast cancer.	387.51	68392-35-8	77	198.705	<1		http://selleckchem.com/products/4-hydroxytamoxifen-4-ht-afimoxifene.html	C26H29NO2	free base	Afimoxifene	CCC(C1=CC=CC=C1)=C(C2=CC=C(O)C=C2)C3=CC=C(OCCN(C)C)C=C3	6.077	1	1	8
S7828	Licochalcone A	e10	L2000-07	Estrogen/progestogen Receptor	Endocrinology & Hormones	Licochalcone A is an estrogenic flavanoid extracted from licorice root, showing antimalarial, anticancer, antibacterial and antiviral activities. Phase 3.	338.4	58749-22-7	67	197.991	<1		http://selleckchem.com/products/licochalcone-a.html	C21H22O4	free base	N/A	COC1=C(/C=C/C(=O)C2=CC=C(O)C=C2)C=C(C(=C1)O)C(C)(C)C=C	4.667	2	2	6
S7829	CB1954	f10	L2000-07	DNA alkylator	DNA Damage	CB1954(Tretazicar) is a anticancer prodrug that is converted in the presence of the enzyme NQO2 and co-substrate caricotamide ( EP-0152R) (EP) into a potent cytotoxic bifunctional alkylating agent. It can be activated by NAD(P)H quinone oxidoreductase 2.	252.18	21919-05-1	50	198.271	<1		http://selleckchem.com/products/cb1954.html	C9H8N4O5	free base	Tretazicar	NC(=O)C1=C(C=C(C(=C1)N2CC2)[N+]([O-])=O)[N+]([O-])=O	0.601	1	1	4
S7839	Endoxifen HCl	g10	L2000-07	Estrogen/progestogen Receptor	Endocrinology & Hormones	Endoxifen HCl, the active metabolite of Tamoxifen, ia a potent and selective estrogen receptor antagonist. Phase 2.	409.95	1032008-74-4	74	180.51	<1		http://selleckchem.com/products/endoxifen-hcl.html	C25H28ClNO2	Hydrochloride	N/A	Cl.CC/C(C1=CC=CC=C1)=C(C2=CC=C(O)C=C2)/C3=CC=C(OCCNC)C=C3	5.923	1	2	8
S7843	BI-847325	h10	L2000-07	MEK,Aurora Kinase	MAPK	BI-847325 is an orally bioavailable, and selective dual MEK/Aurora kinase inhibitor with IC50 of 3 nM, 25 nM, 15 nM, 25 nM, and 4 nM for Xenopus laevis Aurora B, human Aurora A and Aurora C, as well as human MEK1 and MEK2, respectively. Phase 1.	464.56	1207293-36-4	19	40.8989	<1		http://selleckchem.com/products/bi-847325.html	C29H28N4O2	free base	N/A	CCNC(=O)C#CC1=CC=C\2C(=C1)NC(=O)C2=C(NC3=CC=C(CN(C)C)C=C3)/C4=CC=CC=C4	4.041	2	3	8
S7854	Ulixertinib (BVD-523, VRT752271)	a11	L2000-07	ERK	MAPK	Ulixertinib (BVD-523, VRT752271) is a potent and reversible ERK1/ERK2 inhibitor with IC50 of <0.3 nM for ERK2. Phase 1.	433.33	869886-67-9	86	198.463	<1		http://selleckchem.com/products/ulixertinib-bvd-523-vrt752271.html	C21H22Cl2N4O2	free base	N/A	CC(C)NC1=NC=C(Cl)C(=C1)C2=C[NH]C(=C2)C(=O)NC(CO)C3=CC(=CC=C3)Cl	4.266	2	4	7
S7855	Brilanestrant (GDC-0810, ARN-810)	b11	L2000-07	Estrogen/progestogen Receptor	Endocrinology & Hormones	Brilanestrant (GDC-0810, ARN-810） is a potent ER-α binder (ER-α, IC50 = 6.1 nM ER-β, IC50 = 8.8 nM), a full transcriptional antagonist with no agonism and displays good potency and efficacy in ER-α degradation (EC50 = 0.7 nM) and MCF-7 breast cancer cell viability (IC50 = 2.5 nM) assays with good selectivity over other nuclear hormone receptors.	446.9	1365888-06-7	89	199.15	<1		http://selleckchem.com/products/brilanestrant-gdc-0810-arn-810.html	C26H20ClFN2O2	free base	N/A	CCC(\C1=CC=C(F)C=C1Cl)=C(C2=CC=C(\C=C\C(O)=O)C=C2)/C3=CC4=C([NH]N=C4)C=C3	6.808	2	1	6
S7864	Oltipraz	c11	L2000-07	Nrf2	Immunology & Inflammation	Oltipraz is a potent Nrf2 activator and a potent inducer of Phase II detoxification enzymes, most notably glutathione-S-transferase (GST). Phase 3.	226.34	64224-21-1	39	172.307	<1		http://selleckchem.com/products/oltipraz.html	C8H6N2S3	free base	N/A	CC1=C(SSC1=S)C2=NC=CN=C2	2.225	2	0	1
S7875	NVP-CGM097	d11	L2000-07	Mdm2	Apoptosis	NVP-CGM097 is a highly potent and selective MDM2 inhibitor with Ki value of 1.3 nM for hMDM2 in TR-FRET assay. It binds to the p53 binding-site of the Mdm2 protein, disrupting the interaction between both proteins, leading to an activation of the p53 pathway.	659.26	1313363-54-0	65	98.5954	<1		http://selleckchem.com/products/nvp-cgm097.html	C38H47ClN4O4	free base	CGM-097, CGM 097, CGM 097, NVP CGM097	COC1=CC2=C(C=C1OC(C)C)C(N(C(=O)C2)C3=CC=C(C=C3)N(C)CC4CCC(CC4)N5CCN(C)C(=O)C5)C6=CC=C(Cl)C=C6	6.455	4	0	9
S7883	BQ-123	e11	L2000-07	Endothelin Receptor	GPCR & G Protein	BQ-123 is a selective endothelin A receptor (ETA) antagonist with IC50 of 7.3 nM. Phase 2.	610.7	136553-81-6	100	163.747	<1		http://selleckchem.com/products/bq-123.html	C31H42N6O7	free base	N/A	CC(C)CC1NC(=O)C(NC(=O)C2CCCN2C(=O)C(CC(O)=O)NC(=O)C(CC3=C[NH]C4=C3C=CC=C4)NC1=O)C(C)C	1.343	6	5	7
S7886	CC-223	f11	L2000-07	mTOR	PI3K/Akt/mTOR	CC-223 is a potent, selective, and orally bioavailable mTOR inhibitor with IC50 of 16 nM, >200-fold selectivity over the related PI3K-α. Phase 1/2.	397.47	1228013-30-6	79	198.757	<1		http://selleckchem.com/products/cc-223.html	C21H27N5O3	free base	N/A	COC1CCC(CC1)N2C(=O)CNC3=NC=C(N=C23)C4=CN=C(C=C4)C(C)(C)O	1.66	5	1	4
S7891	CC-115	g11	L2000-07	DNA-PK,mTOR	DNA Damage	CC-115 is a dual inhibitor of DNA-dependent protein kinase (DNA-PK) and mammalian target of rapamycin (mTOR) with IC50 values of 0.013 μM and 0.021 μM, respectively. It has potential antineoplastic activity.	336.35	1228013-15-7	67	199.197	<1		http://selleckchem.com/products/cc-115.html	C16H16N8O	free base	N/A	CCN1C(=O)CNC2=NC=C(N=C12)C3=C(C)N=C(C=C3)C4=N[NH]C=N4	0.664	6	2	3
S7892	Avadomide(CC-122)	h11	L2000-07	E3 Ligase	Ubiquitin	Avadomide(CC-122), a new chemical entity termed pleiotropic pathway modifier, is a novel agent for Diffuse large B-cell lymphoma(DLBCL) with antitumor and immunomodulatory activity. Its molecular target is the protein cereblon (CRBN), a substrate receptor of the cullin ring E3 ubiquitin ligase complex CRL4CRBN.	286.29	1015474-32-4	57	199.099	<1		http://selleckchem.com/products/cc-122.html	C14H14N4O3	Free Base	N/A	CC1=NC2=CC=CC(=C2C(=O)N1C3CCC(=O)NC3=O)N	-0.477	4	2	1
S7896	Sodium Tauroursodeoxycholate (TUDC)	a2	L2000-08	Anti-infection	Microbiology	Sodium Tauroursodeoxycholate (TUDC) is a water soluble bile salt, used for the treatment of gallstones and liver cirrhosis.	521.69	35807-85-3	100	191.685	100	191.685	http://selleckchem.com/products/sodium-tauroursodeoxycholate-tudc.html	C26H44NNaO6S	sodium salt	N/A	CC(CCC(=O)NCC[S](=O)(=O)O[Na])C1CCC2C3C(O)CC4CC(O)CCC4(C)C3CCC12C	3.088	2	3	8
S7910	Epacadostat (INCB024360)	b2	L2000-08	IDO	Metabolism	Epacadostat (INCB024360) is a potent and selective indoleamine 2,3-dioxygenase (IDO1) inhibitor with IC50 of 10 nM and displays high selectivity over other related enzymes such as IDO2 or tryptophan 2,3-dioxygenase (TDO).	438.23	1204669-58-8	87	198.526	<1		http://selleckchem.com/products/epacadostat-incb024360.html	C11H13BrFN7O4S	free base	N/A	N[S](=O)(=O)NCCNC1=NON=C1C(NO)=NC2=CC(=C(F)C=C2)Br	0.378	6	4	8
S7917	Kenpaullone	c2	L2000-08	CDK	Cell Cycle	Kenpaullone is an ATP-competitive inhibitor of cyclin-dependent kinases (CDKs). It also inhibit glycogen synthase kinase 3β (GSK3β) with IC50 of 0.23 ?M.	327.18	142273-20-9	65	198.667	<1		http://selleckchem.com/products/kenpaullone.html	C16H11BrN2O	free base	N/A	BrC1=CC2=C([NH]C3=C2CC(=O)NC4=C3C=CC=C4)C=C1	3.671	1	2	0
S7922	Tiplaxtinin (PAI-039)	d2	L2000-08	Others	Others	Tiplaxtinin(PAI-039) is an orally efficacious and selective plasminogen activator inhibitor-1 (PAI-1) inhibitor with IC50 of 2.7 μM.	439.38	393105-53-8	72	163.867	<1		http://selleckchem.com/products/tiplaxtinin-pai-039.html	C24H16F3NO4	free base	N/A	OC(=O)C(=O)C1=C[N](CC2=CC=CC=C2)C3=CC=C(C=C13)C4=CC=C(OC(F)(F)F)C=C4	7.066	3	0	7
S7931	STF-31	e2	L2000-08	GLUT	Metabolism	STF-31 is a selective glucose transporter GLUT1 inhibitor.	423.53	724741-75-7	85	200.694	<1		http://selleckchem.com/products/stf-31.html	C23H25N3O3S	free base	N/A	CC(C)(C)C1=CC=C(C=C1)[S](=O)(=O)NCC2=CC=C(C=C2)C(=O)NC3=CN=CC=C3	3.359	4	2	7
S7936	KD025 (SLx-2119)	f2	L2000-08	ROCK	Cell Cycle	KD025 is an orally available, and selective ROCK2 inhibitor with IC50 and Ki of 60 nM and 41 nM, respectively. Phase 2.	452.51	911417-87-3	90	198.891	<1		http://selleckchem.com/products/kd025-(slx-2119).html	C26H24N6O2	free base	N/A	CC(C)NC(=O)COC1=CC(=CC=C1)C2=NC3=CC=CC=C3C(=N2)NC4=CC5=C([NH]N=C5)C=C4	4.51	5	3	7
S7937	Nemiralisib (GSK2269557)	g2	L2000-08	PI3K	PI3K/Akt/mTOR	Nemiralisib, also known as GSK-2269557, is a potent and selective PI3Kδ inhibitor(pKi = 9.9).	440.54	1254036-71-9	88	199.755	<1		http://selleckchem.com/products/gsk2269557.html	C26H28N6O	free base	Nemiralisib	CC(C)N1CCN(CC1)CC2=CN=C(O2)C3=CC(=CC4=C3C=N[NH]4)C5=CC=CC6=C5C=C[NH]6	3.943	3	2	5
S7938	GSK2292767	h2	L2000-08	PI3K	PI3K/Akt/mTOR	GSK2292767 is a potent and selective PI3Kδ inhibitor.	512.58	1254036-66-2	100	195.091	<1		http://selleckchem.com/products/gsk2292767.html	C24H28N6O5S	free base	N/A	COC1=C(N[S](C)(=O)=O)C=C(C=N1)C2=CC3=C(C=N[NH]3)C(=C2)C4=NC=C(CN5CC(C)OC(C)C5)O4	1.692	8	2	7
S7947	PX-12	a3	L2000-08	Thioredoxin	Metabolism	PX-12 is a potent thioredoxin-1 (Trx-1) inhibitor by irreversibly thioalkylation of Cys73 of Trx-1. Phase 2.	188.31	141400-58-0	38	201.795	<1		http://selleckchem.com/products/px-12.html	C7H12N2S2	free base	N/A	CCC(C)SSC1=NC=C[NH]1	2.641	1	1	4
S7952	Ozanimod (RPC1063)	b3	L2000-08	S1P Receptor	GPCR & G Protein	Ozanimod (RPC1063) is a selective oral S1P Receptor 1 modulator. Phase 3.	404.46	1306760-87-1	81	200.267	<1		http://selleckchem.com/products/ozanimod-rpc1063.html	C23H24N4O3	free base	N/A	CC(C)OC1=CC=C(C=C1C#N)C2=NC(=NO2)C3=CC=CC4=C3CCC4NCCO	3.291	4	2	7
S7953	ETC-1002	c3	L2000-08	AMPK,LDL	PI3K/Akt/mTOR	ETC-1002,also known as Bempedoic acid, is an orally available, once-daily LDL-C lowering small molecule designed to lower elevated levels of LDL-C and to avoid side effects associated with existing LDL-C lowering therapies.ETC-1002 is an activator of hepatic AMP-activated protein kinase (AMPK). It has potent inhibitory activity against hepatic ATP-citrate lyase(IC50=29 uM).	344.49	738606-46-7	68	197.393	<1		http://selleckchem.com/products/etc-1002.html	C19H36O5	free base	Bempedoic acid, ESP-55016	CC(C)(CCCCCC(O)CCCCCC(C)(C)C(O)=O)C(O)=O	5.18	2	1	14
S7955	EPI-001	d3	L2000-08	Androgen Receptor	Endocrinology & Hormones	EPI-001 is an androgen receptor N-terminal domain antagonist with IC50 of ?6 μM and a selective PPAR-gamma modulator.	394.89	227947-06-0	79	200.056	<1		http://selleckchem.com/products/epi-001.html	C21H27ClO5	free base	N/A	CC(C)(C1=CC=C(OCC(O)CO)C=C1)C2=CC=C(OCC(O)CCl)C=C2	3.334	2	3	10
S7963	TIC10	e3	L2000-08	Akt	PI3K/Akt/mTOR	TIC10 inactivates Akt and ERK to induce TRAIL through Foxo3a, possesses superior drug properties: delivery across the blood-brain barrier, superior stability and improved pharmacokinetics. Phase 1/2.	386.49	1616632-77-9	77	199.229	<1		http://selleckchem.com/products/tic-10.html	C24H26N4O	free base	ONC201	CC1=CC=CC=C1CN2C(=O)C3=C(CCN(CC4=CC=CC=C4)C3)N5CCN=C25	3.212	2	0	4
S7965	PLX8394	f3	L2000-08	Raf	MAPK	PLX8394 is a next-generation, orally available, small-molecule <b>BRAF</b> inhibitor with IC50 values of 3.8 nM, 14 nM and 23 nM for BRAF(V600E), WT BRAF and CRAF respectively. It has potential antineoplastic activity.	542.53	1393466-87-9	100	184.322	<1		http://www.selleckchem.com/products/plx8394.html	C25H21F3N6O3S	Free Base	N/A	FC1CCN(C1)[S](=O)(=O)NC2=CC=C(F)C(=C2F)C(=O)C3=C[NH]C4=NC=C(C=C34)C5=CN=C(N=C5)C6CC6	2.252	6	2	7
S7966	AZD8835	g3	L2000-08	PI3K	PI3K/Akt/mTOR	AZD8835 ia a novel mixed inhibitor of PI3Kα and PI3Kδ with IC50 of 6.2 nM and 5.7 nM, respectively, also with selectivity against PI3Kβ (IC50=431 nM) and PI3Kγ (IC50=90 nM).	469.54	1620576-64-8	93	198.066	<1		http://selleckchem.com/products/azd8835.html	C22H31N9O3	free base	N/A	CC[N]1N=C(N=C1C2=CN=C(N)C(=N2)C3=NN=C(O3)C(C)(C)C)C4CCN(CC4)C(=O)CCO	0.942	8	2	7
S7968	P7C3	h3	L2000-08	NAMPT	Metabolism	P7C3 is a potent proneurogenic and neuroprotective chemical that targets NAMPT enzyme.	474.19	301353-96-8	95	200.342	<1		http://selleckchem.com/products/p7c3.html	C21H18Br2N2O	free base	N/A	OC(CNC1=CC=CC=C1)C[N]2C3=C(C=C(Br)C=C3)C4=C2C=CC(=C4)Br	5.972	0	2	5
S7971	AZD3759	a4	L2000-08	EGFR	Protein Tyrosine Kinase	AZD3759 is a potent, oral active, CNS-penetrant EGFR inhibitor with IC50 of 0.3 nM, 0.2 nM, and 0.2 nM for EGFR (WT), EGFR (L858R), and EGFR (exon 19Del), respectively. Phase 1.	459.9	1626387-80-1	91	197.869	<1		http://selleckchem.com/products/azd3759.html	C22H23ClFN5O3	free base	N/A	COC1=C(OC(=O)N2CCN(C)CC2C)C=C3C(=NC=NC3=C1)NC4=CC=CC(=C4F)Cl	4.635	5	1	5
S7974	L755507	b4	L2000-08	Adrenergic Receptor	GPCR & G Protein	L-755,507 is characterized as a potent and selective β3 adrenergic receptor partial agonist with EC50 of 0.43 nM. It is also recently identified to enhance CRISPR-mediated homology-directed repair (HDR) efficiency in human induced pluripotent stem cells (iPSCs) and other cell types.	584.73	159182-43-1	100	171.019	<1		http://selleckchem.com/products/l755507.html	C30H40N4O6S	free base	N/A	CCCCCCNC(=O)NC1=CC=C(C=C1)[S](=O)(=O)NC2=CC=C(CCNCC(O)COC3=CC=C(O)C=C3)C=C2	4.413	4	6	17
S7977	Napabucasin	c4	L2000-08	STAT	JAK/STAT	Napabucasin is an orally available Stat3 and cancer cell stemness inhibitor.	240.21	83280-65-3	10	41.6302	<1		http://selleckchem.com/products/napabucasin.html	C14H8O4	free base	BBI608	CC(=O)C1=CC2=C(O1)C(=O)C3=CC=CC=C3C2=O	2.234	4	0	1
S7979	FG-2216	d4	L2000-08	HIF	Angiogenesis	FG-2216 is a potent, and orally active HIF prolyl 4-hydroxylase inhibitor with IC50 of 3.9 μM for PHD2. Phase 2.	280.66	223387-75-5	56	199.53	<1		http://selleckchem.com/products/fg-2216.html	C12H9ClN2O4	free base	N/A	OC(=O)CNC(=O)C1=C(O)C2=CC=CC=C2C(=N1)Cl	1.337	3	2	3
S7993	SKF38393 HCl	e4	L2000-08	Dopamine Receptor	Neuronal Signaling	SKF38393 HCl is a selective dopamine D1/D5 receptor agonist.	291.77	62717-42-4	58	198.787	<1		http://selleckchem.com/products/skf38393-hcl.html	C16H18ClNO2	Hydrochloride	N/A	Cl.OC1=C(O)C=C2C(CNCCC2=C1)C3=CC=CC=C3	3.013	0	3	1
S7999	SKF96365	f4	L2000-08	Calcium Channel	Transmembrane Transporters	SKF96365, originally identified as a blocker of receptor-mediated calcium entry, is widely used diagnostically, as a blocker of transient receptor potential canonical type (TRPC) channels.	402.91	130495-35-1	80	198.556	80	198.556	http://selleckchem.com/products/skf96365.html	C22H27ClN2O3	hydrochloride	N/A	Cl.COC1=CC=C(CCCOC(C[N]2C=CN=C2)C3=CC=C(OC)C=C3)C=C1	4.114	4	0	10
S8001	Ricolinostat (ACY-1215)	g4	L2000-08	HDAC	Epigenetics	Ricolinostat (ACY-1215) is a selective HDAC6 inhibitor with IC50 of 5 nM in a cell-free assay. It is >10-fold more selective for HDAC6 than HDAC1/2/3 (class I HDACs) with slight activity against HDAC8, minimal activity against HDAC4/5/7/9/11, Sirtuin1, and Sirtuin2. Phase 2.	433.5	1316214-52-4	86	198.385	<1		http://selleckchem.com/products/rocilinostat-acy-1215.html	C24H27N5O3	free base	Rocilinostat	ONC(=O)CCCCCCNC(=O)C1=CN=C(N=C1)N(C2=CC=CC=C2)C3=CC=CC=C3	3.917	4	2	11
S8002	GSK2636771	h4	L2000-08	PI3K	PI3K/Akt/mTOR	GSK2636771 is a potent, orally bioavailable and selective inhibitor of PI3Kβ with >900-fold selectivity over PI3Kα/PI3Kγ and >10-fold over PI3Kδ. Sensitive to PTEN null cell lines.	433.42	1372540-25-4	28	64.6025	<1		http://selleckchem.com/products/gsk2636771.html	C22H22F3N3O3	free base	N/A	CC1=NC2=C(C=C(C=C2[N]1CC3=CC=CC(=C3C)C(F)(F)F)N4CCOCC4)C(O)=O	4.303	3	0	5
S8003	PQ 401	a5	L2000-08	IGF-1R	Protein Tyrosine Kinase	PQ401 inhibits autophosphorylation of IGF-1R domain with IC50 of <1 μM.	341.79	196868-63-0	32	93.6247	<1		http://selleckchem.com/products/pq-401.html	C18H16ClN3O2	free base	N/A	COC1=C(NC(=O)NC2=C3C=CC=CC3=NC(=C2)C)C=C(Cl)C=C1	3.639	3	2	3
S8005	SMI-4a	b5	L2000-08	Pim	JAK/STAT	SMI-4a is a potent inhibitor of?Pim1?with?IC50?of 17 nM, modestly potent to Pim-2, does not significantly inhibit any other serine/threonine- or tyrosine-kinases.	273.23	438190-29-5	55	201.296	<1		http://selleckchem.com/products/smi-4a.html	C11H6F3NO2S	free base	TCS PIM-1 4a	FC(F)(F)C1=CC(=CC=C1)\C=C2/SC(=O)NC2=O	2.884	2	1	2
S8009	AG-18	c5	L2000-08	EGFR	Protein Tyrosine Kinase	AG-18 inhibits EGFR with IC50 of 35 μM.	186.17	118409-57-7	37	198.743	<1		http://selleckchem.com/products/ag-18-tyrphostin-23.html	C10H6N2O2	free base	RG-50810, Tyrphostin A23, TX 825	OC1=C(O)C=C(C=C1)C=C(C#N)C#N	1.531	0	2	1
S8010	PRX-08066 Maleic acid	d5	L2000-08	5-HT Receptor	Neuronal Signaling	PRX-08066 Maleic acid is a selective 5-HT2B receptor antagonist with IC50 of 3.4 nM, prevents the severity of pulmonary arterial hypertension in the MCT rat model. Phase 2.	517.96	866206-55-5	104	200.788	104	200.788	http://selleckchem.com/products/prx-08066.html	C23H21ClFN5O4S	Maleate	N/A	OC(=O)\C=C/C(O)=O.FC1=CC=C(CN2CCC(CC2)NC3=NC=NC4=C3C=C(Cl)S4)C=C1C#N	0.701	4	1	6
S8015	CEP-32496	e5	L2000-08	CSF-1R,Raf	MAPK	CEP-32496 is a highly potent inhibitor of BRAF(V600E/WT) and c-Raf with Kd of 14 nM/36 nM and 39 nM, also potent to Abl-1, c-Kit, Ret, PDGFRβ and VEGFR2, respectively insignificant affinity for MEK-1, MEK-2, ERK-1 and ERK-2. Phase 1/2.	517.46	1188910-76-0	9	17.3926	<1		http://selleckchem.com/products/cep-32496.html	C24H22F3N5O5	free base	N/A	COC1=CC2=NC=NC(=C2C=C1OC)OC3=CC(=CC=C3)NC(=O)NC4=NOC(=C4)C(C)(C)C(F)(F)F	5.288	8	2	8
S8018	Nirogacestat (PF-03084014, PF-3084014)	f5	L2000-08	Gamma-secretase	Neuronal Signaling	Nirogacestat (PF-03084014, PF-3084014) is a selective gamma-secretase inhibitor with IC50 of 6.2 nM in a cell-free assay. Phase 2.	489.64	1290543-63-3	97	198.105	<1		http://selleckchem.com/products/pf-03084014-pf-3084014.html	C27H41F2N5O	free base	N/A	CCCC(NC1CCC2=CC(=CC(=C2C1)F)F)C(=O)NC3=C[N](C=N3)C(C)(C)CNCC(C)(C)C	5.042	2	3	11
S8019	AZD5363	g5	L2000-08	Akt	PI3K/Akt/mTOR	AZD5363 potently inhibits all isoforms of Akt(Akt1/Akt2/Akt3) with IC50 of 3 nM/8 nM/8 nM in cell-free assays, similar to P70S6K/PKA and lower activity towards ROCK1/2. Phase 2.	428.92	1143532-39-1	86	200.504	<1		http://selleckchem.com/products/azd5363.html	C21H25ClN6O2	free base	N/A	NC1(CCN(CC1)C2=NC=NC3=C2C=C[NH]3)C(=O)NC(CCO)C4=CC=C(Cl)C=C4	1.317	3	4	6
S8020	GW0742	h5	L2000-08	PPAR	Metabolism	GW0742 is a potent and highly selective PPARβ/δ agonist, with IC50 of 1 nM, with 1000-fold selectivity over hPPARα and hPPARγ.	471.49	317318-84-6	94	199.368	<1		http://selleckchem.com/products/gw0742.html	C21H17F4NO3S2	free base	N/A	CC1=CC(=CC=C1OCC(O)=O)SCC2=C(C)N=C(S2)C3=CC=C(C(=C3)F)C(F)(F)F	5.795	3	0	8
S8024	Tyrphostin AG 1296	a6	L2000-08	c-Kit,PDGFR	Protein Tyrosine Kinase	Tyrphostin AG 1296 is an inhibitor of PDGFR with IC50 of 0.3-0.5 μM, no activity to EGFR.	266.29	146535-11-7	6	22.5318	<1		http://selleckchem.com/products/tyrphostin-ag-1296-ag-1296.html	C16H14N2O2	free base	AG 1296	COC1=CC2=NC=C(N=C2C=C1OC)C3=CC=CC=C3	3.208	4	0	3
S8025	GSK3787	b6	L2000-08	PPAR	Metabolism	GSK3787 is as a selective and irreversible antagonist of PPARδ with pIC50 of 6.6, with no measurable affinity for hPPARα or hPPARγ.	392.78	188591-46-0	79	201.13	<1		http://selleckchem.com/products/gsk3787.html	C15H12ClF3N2O3S	free base	N/A	FC(F)(F)C1=CC=C(N=C1)[S](=O)(=O)CCNC(=O)C2=CC=C(Cl)C=C2	3.207	4	1	6
S8028	Tariquidar	c6	L2000-08	P-gp	Transmembrane Transporters	Tariquidar is a potent and selective noncompetitive inhibitor of P-glycoprotein with Kd of 5.1 nM in CHrB30 cell line, reverses drug resistance in MDR cell Lines. Phase 3.	646.73	206873-63-4	52	80.4045	<1		http://selleckchem.com/products/tariquidar.html	C38H38N4O6	free base	XR9576	COC1=CC2=C(CN(CCC3=CC=C(NC(=O)C4=C(NC(=O)C5=CC6=CC=CC=C6N=C5)C=C(OC)C(=C4)OC)C=C3)CC2)C=C1OC	5.573	7	2	11
S8032	PRT062607 (P505-15, BIIB057) HCl	d6	L2000-08	Syk	Angiogenesis	PRT062607 (P505-15, BIIB057) HCl is a novel, highly selective Syk inhibitor with IC50 of 1 nM in cell-free assays, >80-fold selective for Syk than Fgr, Lyn, FAK, Pyk2 and Zap70.	429.91	1370261-97-4	86	200.042	86	200.042	http://selleckchem.com/products/prt062607-p505-15-hcl.html	C19H24ClN9O	Hydrochloride	N/A	Cl.NC1CCCCC1NC2=NC=C(C(N)=O)C(=N2)NC3=CC(=CC=C3)[N]4N=CC=N4	2.033	5	4	6
S8039	PU-H71	e6	L2000-08	HSP (e.g. HSP90)	Cytoskeletal Signaling	PU-H71 is a potent and selective inhibitor of HSP90 with IC50 of 51 nM. Phase 1.	512.37	873436-91-0	100	195.171	34	66.3583	http://selleckchem.com/products/pu-h71.html	C18H21IN6O2S	free base	NSC 750424	CC(C)NCCC[N]1C(=NC2=C(N)N=CN=C12)SC3=CC4=C(OCO4)C=C3I	3.162	5	2	7
S8040	GDC-0349	f6	L2000-08	mTOR	PI3K/Akt/mTOR	GDC-0349 is a potent and selective ATP-competitive inhibitor of mTOR with Ki of 3.8 nM, 790-fold inhibitory effect against PI3Kα and other 266 kinases. Phase 1.	452.55	1207360-89-1	91	201.083	<1		http://selleckchem.com/products/gdc-0349.html	C24H32N6O3	free base	RG-7603	CCNC(=O)NC1=CC=C(C=C1)C2=NC(=C3CCN(CC3=N2)C4COC4)N5CCOCC5C	1.982	5	2	5
S8054	ASP3026	g6	L2000-08	ALK	Protein Tyrosine Kinase	ASP3026 is a novel and selective inhibitor for ALK with IC50 of 3.5 nM. Phase 1.	580.74	1097917-15-1	14	24.1072	<1		http://selleckchem.com/products/asp3026.html	C29H40N8O3S	free base	N/A	COC1=CC(=CC=C1NC2=NC(=NC=N2)NC3=CC=CC=C3[S](=O)(=O)C(C)C)N4CCC(CC4)N5CCN(C)CC5	4.554	6	2	9
S8056	Lomeguatrib	h6	L2000-08	Transferase	Metabolism	Lomeguatrib is a potent inhibitor of O6-alkylguanine-DNA-alkyltransferase with IC50 of 5 nM.	326.17	192441-08-0	65	199.283	<1		http://selleckchem.com/products/lomeguatrib.html	C10H8BrN5OS	free base	PaTrin-2	NC1=NC2=C([NH]C=N2)C(=N1)OCC3=CC(=CS3)Br	2.131	4	2	3
S8057	Pacritinib (SB1518)	a7	L2000-08	FLT3,JAK	JAK/STAT	Pacritinib (SB1518) is a potent and selective inhibitor of Janus Kinase 2 (JAK2) and Fms-Like Tyrosine Kinase-3 (FLT3) with IC50s of 23 and 22 nM in cell-free assays, respectively. Phase 3.	472.58	937272-79-2	11	23.2765	<1		http://selleckchem.com/products/pacritinib-sb1518.html	C28H32N4O3	free base	N/A	C1CCN(C1)CCOC2=CC=C3NC4=NC=CC(=N4)C5=CC(=CC=C5)COC\C=C\COCC2=C3	4.547	5	1	4
S8058	P276-00	b7	L2000-08	CDK	Cell Cycle	P276-00 is a novel CDK1, CDK4 and CDK9 inhibitor with IC50 of 79 nM, 63 nM and 20 nM, respectively. Phase 2/3.	438.3	920113-03-7	88	200.776	88	200.776	http://selleckchem.com/products/p276-00.html	C21H21Cl2NO5	HCl	N/A	Cl.CN1CCC(C1CO)C2=C(O)C=C(O)C3=C2OC(=CC3=O)C4=C(Cl)C=CC=C4	3.49	2	3	3
S8061	Sabutoclax	c7	L2000-08	Bcl-2	Apoptosis	Sabutoclax(BI-97C1) is a pan-Bcl-2 inhibitor, including Bcl-xL, Bcl-2, Mcl-1 and Bfl-1 with IC50 of 0.31 μM, 0.32 μM, 0.20 μM and 0.62 μM, respectively.	700.78	1228108-65-3	100	142.698	<1		http://selleckchem.com/products/sabutoclax.html	C42H40N2O8	free base	BI-97C1	CC(CNC(=O)C1=C(O)C(=CC2=C1C=C(C)C(=C2O)C3=C(O)C4=CC(=C(O)C(=C4C=C3C)C(=O)NCC(C)C5=CC=CC=C5)O)O)C6=CC=CC=C6	7.549	2	8	9
S8078	Bardoxolone Methyl	d7	L2000-08	IκB/IKK	NF-κB	Bardoxolone Methyl is an IKK inhibitor, showing potent proapoptotic and anti-inflammatory activities Also a potent Nrf2 activator and nuclear factor-κB (NF-κB) inhibitor.	505.69	218600-53-4	21	41.5274	<1		http://selleckchem.com/products/bardoxolone-methyl.html	C32H43NO4	free base	RTA 402, TP-155, NSC 713200, CDDO Methyl Ester	COC(=O)C12CCC(C)(C)CC1C3C(=O)C=C4C(C)(CCC5C(C)(C)C(=O)C(=CC45C)C#N)C3(C)CC2	5.798	4	0	2
S8103	Sotagliflozin (LX4211)	e7	L2000-08	SGLT	GPCR & G Protein	Sotagliflozin (LX4211) is an oral dual SGLT1/SGLT2 inhibitor with IC50 of 36 nM and 1.8 nM, respectively. Phase 3.	424.94	1018899-04-1	84	197.675	<1		http://selleckchem.com/products/sotagliflozin-lx4211.html	C21H25ClO5S	free base	N/A	CCOC1=CC=C(CC2=C(Cl)C=CC(=C2)C3OC(SC)C(O)C(O)C3O)C=C1	3.734	2	3	6
S8104	SCH58261	f7	L2000-08	Adenosine Receptor	GPCR & G Protein	SCH 58261 is a potent and selective A2a adenosine receptor antagonist with Ki of 2.3 nM and 2 nM for rat A2a and bovine A2a, respectively.	345.36	160098-96-4	69	199.792	<1		http://selleckchem.com/products/sch58261.html	C18H15N7O	free base	N/A	NC1=NC2=C(C=N[N]2CCC3=CC=CC=C3)C4=NC(=N[N]14)C5=CC=CO5	2.74	5	1	4
S8105	ZM241385	g7	L2000-08	Adenosine Receptor	GPCR & G Protein	ZM-241385?is a high affinity antagonist ligand selective for the adenosine A2A receptor.	337.34	139180-30-6	67	198.613	<1		http://selleckchem.com/products/zm241385.html	C16H15N7O2	free base	N/A	NC1=NC(=NC2=NC(=N[N]12)C3=CC=CO3)NCCC4=CC=C(O)C=C4	2.917	5	3	5
S8117	GMX1778 (CHS828)	h7	L2000-08	NAMPT	Metabolism	GMX1778 (CHS828) is a potent and specific inhibitor of nicotinamide phosphoribosyltransferase (NAMPT) with IC50 and Kd of < 25 nM and 120 nM, respectively. Phase 1.	371.86	200484-11-3	74	199	<1		http://selleckchem.com/products/gmx1778-chs828.html	C19H22ClN5O	free base	N/A	ClC1=CC=C(OCCCCCCNC(NC2=CC=NC=C2)=NC#N)C=C1	3.84	3	2	11
S8118	RHPS 4 methosulfate	a8	L2000-08	Telomerase	DNA Damage	RHPS4 is a potent inhibitor of Telomerase at submicromolar.	458.48	390362-78-4	91	198.482	<1		http://selleckchem.com/products/rhps4-nsc714187.html	C23H20F2N2O4S	methyl sulfate	NSC714187	CO[S]([O-])(=O)=O.CN1C2=CC=C(F)C=C2C3=[N+](C)C4=C(C=C(F)C=C4)C5=CC(=CC1=C35)C	3.363	1	0	1
S8124	BMS-582949	b8	L2000-08	p38 MAPK	MAPK	BMS-582949 is a potent and selective p38 mitogen-activated protein kinase (p38 MAPK) inhibitor with IC50 of 13nM,inhibiting both p38 kinase activity and activation of p38.	406.48	623152-17-0	81	199.272	<1		http://selleckchem.com/products/bms-582949.html	C22H26N6O2	free base	PS540446	CCCNC(=O)C1=C[N]2N=CN=C(NC3=CC(=CC=C3C)C(=O)NC4CC4)C2=C1C	3.269	4	3	7
S8125	Pamapimod (R-1503, Ro4402257)	c8	L2000-08	p38 MAPK	MAPK	Pamapimod (R-1503, Ro4402257) is a novel, selective inhibitor of p38 mitogen-activated protein kinase. It inhibits p38α and p38β enzymatic activity with IC50 values of 0.014±0.002 and 0.48± 0.04 microM, respectively with no activity against p38delta or p38gamma isoforms.	406.38	449811-01-2	81	199.321	<1		http://selleckchem.com/products/pamapimod-r-1503-ro4402257.html	C19H20F2N4O4	free base	N/A	CN1C(=O)C(=CC2=CN=C(NC(CCO)CCO)N=C12)OC3=C(F)C=C(F)C=C3	1.298	4	3	8
S8126	MK571	d8	L2000-08	LTR	Immunology & Inflammation	MK-571 is a selective, orally active CysLT1 receptor(Cysteinyl leukotriene receptor) antagonist.	515.09	115104-28-4	100	194.141	<1		http://selleckchem.com/products/mk571.html	C26H26ClN2NaO3S2	free base	L-660711, L660711, MK-571, MK 571	[Na+].CN(C)C(=O)CCSC(SCCC([O-])=O)C1=CC(=CC=C1)/C=C/C2=NC3=CC(=CC=C3C=C2)Cl	4.227	2	0	11
S8128	BAY 41-2272	e8	L2000-08	Others	Others	BAY 41-2272 is a direct and NO-independent soluble guanylate cyclase (sGC) stimulator.	360.39	256376-24-6	35	97.117	<1		http://selleckchem.com/products/bay-41-2272.html	C20H17FN6	free base	N/A	NC1=NC(=NC=C1C2CC2)C3=N[N](CC4=C(F)C=CC=C4)C5=NC=CC=C35	3.402	4	1	4
S8161	ON123300	f8	L2000-08	CDK	Cell Cycle	ON123300 is a potent and multi-targeted kinase inhibitor with IC50 of 3.9 nM, 5 nM, 26 nM, 26 nM, 9.2 nM and 11nM for CDK4, Ark5, PDGFRβ, FGFR1, RET, and Fyn, respectively.	429.52	1357470-29-1	29	67.5172	<1		http://selleckchem.com/products/on123300.html	C24H27N7O	free base	N/A	CN1CCN(CC1)C2=CC=C(NC3=NC=C4C=C(C#N)C(=O)N(C5CCCC5)C4=N3)C=C2	3.65	3	1	4
S8163	GDC-0084	g8	L2000-08	PI3K,mTOR	PI3K/Akt/mTOR	GDC-0084 is a brain penetrant inhibitor of PI3K and mTOR with Kiapp values of 2 nM, 46 nM, 3 nM, 10 nM and 70 nM for PI3Kα, PI3Kβ, PI3Kδ, PI3Kγ and mTOR.	382.42	1382979-44-3	8	20.9194	<1		http://selleckchem.com/products/gdc-0084.html	C18H22N8O2	free base	N/A	CC1(C)OCC[N]2C3=C(N=C12)C(=NC(=N3)C4=CN=C(N)N=C4)N5CCOCC5	0.588	7	1	2
S8166	ONO-4059 (GS-4059) hydrochloride	h8	L2000-08	BTK	Angiogenesis	ONO-4059 (GS-4059) is highly potent and selective BTK inhibitor with an IC50 of 2.2 nM.	490.94	1439901-97-9	98	199.617	<1		http://selleckchem.com/products/ono-4059-gs-4059.html	C25H23ClN6O3	hydrochloride	N/A	Cl.CC#CC(=O)N1CCC(C1)N2C(=O)N(C3=CC=C(OC4=CC=CC=C4)C=C3)C5=C(N)N=CN=C25	3.706	5	1	5
S8167	AMG 337	a9	L2000-08	c-Met	Protein Tyrosine Kinase	AMG 337 is an oral, small molecule, ATP-competitive, highly selective inhibitor of the MET receptor with an IC50 of 1 nM.	463.46	1173699-31-4	95	204.98	<1		http://selleckchem.com/products/amg-337.html	C23H22FN7O3	free base	N/A	COCCOC1=CC2=C(C=CN(C(C)C3=NN=C4[N]3C=C(C=C4F)C5=C[N](C)N=C5)C2=O)N=C1	1.188	7	0	7
S8171	Daprodustat (GSK1278863)	b9	L2000-08	HIF	Angiogenesis	Daprodustat (GSK1278863) is an orally administered hypoxia-inducible factor-prolyl hydroxylase (HIF-PH) inhibitor. Phase 2.	393.43	960539-70-2	10	25.4175	<1		http://selleckchem.com/products/daprodustat.html	C19H27N3O6	free base	N/A	OC(=O)CNC(=O)C1C(=O)N(C2CCCCC2)C(=O)N(C3CCCCC3)C1=O	1.747	5	1	5
S8172	Ro 61-8048	c9	L2000-08	Hydroxylase	Metabolism	Ro 61-8048 is a high-affinity kynurenine 3-hydroxylase (KMO) inhibitor with IC50 and Ki of 37 nM and 4.8 nM, respectively.	421.45	199666-03-0	84	199.312	<1		http://selleckchem.com/products/ro-61-8048.html	C17H15N3O6S2	free base	N/A	COC1=C(OC)C=C(C=C1)[S](=O)(=O)NC2=NC(=CS2)C3=CC=CC(=C3)[N+]([O-])=O	3.123	5	1	7
S8173	Verubecestat (MK-8931) Trifluoroacetat	d9	L2000-08	BACE	Neuronal Signaling	Verubecestat (MK-8931) is a potent and selective beta-secretase inhibitor and BACE1 protein inhibitor or Beta-site APP-cleaving enzyme 1 inhibitor.	523.43	1286770-55-5(free base)	81	154.748	<1		http://selleckchem.com/products/verubecestat-mk-8931.html	C19H18F5N5O5S	Trifluoroacetat	MK-8931	CN1C(=N)NC(C)(C[S]1(=O)=O)C2=CC(=CC=C2F)NC(=O)C3=CC=C(F)C=N3.OC(=O)C(F)(F)F	2.198	5	2	4
S8188	BFH772	e9	L2000-08	VEGFR	Angiogenesis	BFH772 is a novel potent oral VEGFR2 inhibitor, targeting VEGFR2 kinase with IC50 of 3 nM.	439.39	890128-81-1	87	198.002	<1		http://selleckchem.com/products/bfh772.html	C23H16F3N3O3	free base	BFH 772, BFH-772	OCC1=CC(=NC=N1)OC2=CC=C3C(=C2)C=CC=C3C(=O)NC4=CC(=CC=C4)C(F)(F)F	4.396	4	2	6
S8193	Lanabecestat（AZD3293, LY3314814）	f9	L2000-08	BACE	Neuronal Signaling	Lanabecestat（AZD3293, LY3314814）is an oral beta-secretase 1 cleaving enzyme (BACE) inhibitor with an inhibitory constant Ki?of?0.4 nM.	412.53	1383982-64-6	82	198.773	<1		http://selleckchem.com/products/azd3293-ly3314814.html	C26H28N4O	free base	N/A	COC1CCC2(CC1)CC3=C(C=C(C=C3)C4=CN=CC(=C4)C#CC)C25N=C(C)C(=N5)N	3.882	4	1	3
S8194	umbralisib (TGR-1202)	g9	L2000-08	PI3K	PI3K/Akt/mTOR	TGR-1202, a novel, next generation PI3Kδ inhibitor, inhibits PI3Kδ activity in enzyme and cell based assays with IC50 and EC50 values of 22.2 & 24.3 nM, respectively.	571.55	1532533-67-7	100	174.963	<1		http://selleckchem.com/products/tgr-1202.html	C31H24F3N5O3	free base	Rp-5264	CC(C)OC1=C(F)C=C(C=C1)C2=N[N](C(C)C3=C(C4=CC(=CC=C4)F)C(=O)C5=CC(=CC=C5O3)F)C6=C2C(=NC=N6)N	6.393	6	1	6
S8200	MK-4101	h9	L2000-08	Hedgehog/Smoothened	Stem Cells & Wnt	MK-4101, a potent inhibitor of the Hedgehog pathway, shows anti-tumor activity through the inhibition of proliferation and induction of extensive apoptosis in tumor cells.	493.47	935273-79-3	98	198.594	<1		http://selleckchem.com/products/mk-4101.html	C24H24F5N5O	free base	N/A	C[N]1C(=NN=C1C23CCC(CC2)(CC3)C4=NOC(=N4)C5CC(F)(F)C5)C6=CC=CC=C6C(F)(F)F	4.784	5	0	5
S8215	BAY 1217389	a10	L2000-08	Kinesin,Serine/threonin kinase	Cytoskeletal Signaling	BAY 1217389 is an orally bioavailable, selective inhibitor of the serine/threonine kinase monopolar spindle 1 (Mps1) with IC50 values below 10 nmol/L while showing an excellent selectivity profile.	561.5	1554458-53-5	100	178.094	<1		http://selleckchem.com/products/bay-1217389.html	C27H24F5N5O3	free base	N/A	COC1=CC=C(OC2=N[N]3C(=CN=C3C(=C2)NCCC(F)(F)F)C4=CC(=C(C=C4)C(=O)NC5CC5)C)C(=C1F)F	5.255	5	2	10
S8219	Bitopertin	b10	L2000-08	GlyT	Neuronal Signaling	Bitopertin (RG1678,RO-4917838) is a potent inhibitor of glycine transporter 1 (GlyT1), with Ki of 8.1 nM for human hGlyT1b and IC50 of 22-25 nM in Chinese hamster ovary cells.	543.46	845614-11-1	100	184.006	<1		http://selleckchem.com/products/bitopertin-rg1678-ro-4917838.html	C21H20F7N3O4S	free base	RG1678, RO-4917838	CC(OC1=CC=C(C=C1C(=O)N2CCN(CC2)C3=NC=C(C=C3F)C(F)(F)F)[S](C)(=O)=O)C(F)(F)F	4.304	5	0	7
S8228	NT157	c10	L2000-08	IGF-1R	Protein Tyrosine Kinase	NT157, a selective inhibitor of IRS-1/2(insulin receptor substrate), has the potential to inhibit IGF-1R and STAT3 signaling pathways in cancer cells and stroma cells of TME leading to a decrease in cancer cell survival.	412.26	1384426-12-3	82	198.904	<1		http://selleckchem.com/products/nt157.html	C16H14BrNO5S	free base	N/A	OC1=CC(=CC(=C1O)O)CNC(=S)/C=C/C2=CC(=C(O)C(=C2)Br)O	3.721	0	6	5
S8236	MK-886 (L-663,536)	d10	L2000-08	Lipoxygenase	Metabolism	MK-886 is an inhibitor of leukotriene biosynthesis, inhibiting 5-lipoxygenase-activating protein (FLAP). It is also a moderately potent PPARα antagonist.	472.08	118414-82-7	94	199.119	<1		http://selleckchem.com/products/mk-886-l-663-536.html	C27H34ClNO2S	free base	L-663536	CC(C)C1=CC=C2[N](CC3=CC=C(Cl)C=C3)C(=C(SC(C)(C)C)C2=C1)CC(C)(C)C(O)=O	8.114	1	0	8
S8241	Ponesimod	e10	L2000-08	S1P Receptor	GPCR & G Protein	Ponesimod(ACT-128800) is an orally active, selective sphingosine-1-phosphate receptor 1 (S1P1) immunomodulator with EC50 of 5.7 nM.	460.97	854107-55-4	92	199.579	<1		http://selleckchem.com/products/ponesimod-act-128800.html	C23H25ClN2O4S	free base	ACT-128800	CCCN=C1S\C(=C/C2=CC=C(OCC(O)CO)C(=C2)Cl)C(=O)N1C3=CC=CC=C3C	4.941	3	2	8
S8244	Etomoxir (Na salt)	f10	L2000-08	Transferase	Metabolism	Etomoxir is an irreversible inhibitor of carnitine palmitoyltransferase-1 (CPT-1) on the outer face of the inner mitochondrial membrane.	320.74	828934-41-4	64	199.539	64	199.539	http://selleckchem.com/products/etomoxir-na-salt.html	C15H18ClNaO4	sodium salt	N/A	[Na]OC(=O)C1(CCCCCCOC2=CC=C(Cl)C=C2)CO1	3.847	4	0	10
S8253	CCT245737	g10	L2000-08	Chk	Cell Cycle	CCT245737 is an orally active CHK1 inhibitor with The IC50 of 1.4 nM. It exhibits >1,000-fold selectivity against CHK2 and CDK1.	379.34	1489389-18-5	75	197.712	<1		http://selleckchem.com/products/cct245737.html	C16H16F3N7O	free base	N/A,SRA737	FC(F)(F)C1=CN=C(NC2=CN=C(C=N2)C#N)C=C1NCC3CNCCO3	1.46	4	3	6
S8262	PRI-724	h10	L2000-08	Wnt/beta-catenin	Stem Cells & Wnt	PRI-724 is a potent, specific inhibitor of the canonical Wnt signaling pathway in cancer stem cells with potential antineoplastic activity. PRI-724 specifically inhibits the recruiting of beta-catenin with its coactivator CBP.	548.63	847591-62-2	100	182.272	<1		http://selleckchem.com/products/pri-724.html	C33H32N4O4	free base	N/A	OC1=CC=C(CC2N3C(CN(CC4=CC=CC5=C4C=CC=C5)C2=O)N(CCC3=O)C(=O)NCC6=CC=CC=C6)C=C1	4.065	3	2	6
S8270	SRT2183	a11	L2000-08	Sirtuin	DNA Damage	SRT2183 is a small-molecule activator of the sirtuin subtype SIRT1, currently being developed by Sirtris Pharmaceuticals.	468.57	1001908-89-9	93	198.476	<1		http://selleckchem.com/products/srt2183.html	C27H24N4O2S	free base	N/A	OC1CCN(C1)CC2=CSC3=NC(=C[N]23)C4=C(NC(=O)C5=CC6=C(C=CC=C6)C=C5)C=CC=C4	3.6	2	2	5
S8275	eFT-508 (eFT508)	b11	L2000-08	MNK	MAPK	eFT-508 (eFT508) is a potent and selective MNK1/2 inhibitor with IC50s of 2.4 nM and 1 nM, respectively. It potentially results in decreased tumor cell proliferation and tumor growth.	340.38	1849590-01-7	13	38.1926	<1		http://selleckchem.com/products/eft-508.html	C17H20N6O2	free base	N/A	CC1=C2N(C(=O)C(=C1)NC3=NC=NC(=C3)N)C4(CCCCC4)NC2=O	0.717	4	3	2
S8278	SHP099 dihydrochloride	c11	L2000-08	phosphatase	Others	SHP099 is a highly potent, selective and orally bioavailable small-molecule SHP2 inhibitor with an IC50?value of?0.071?μM and shows no activity against SHP1.	425.18	1801747-42-1(free base)	77	181.1	2	4.70389	http://selleckchem.com/products/shp099-dihydrochloride.html	C16H21Cl4N5	Dihydrochloride	N/A	Cl.CC1(N)CCN(CC1)C2=CN=C(C(=N2)N)C3=CC=CC(=C3Cl)Cl	3.41	2	2	2
S8286	MKC-3946	d11	L2000-08	Others	Others	MKC3946 is a potent and soluble IRE1α endoribonuclease domain inhibitor which triggered modest growth inhibition in multiple myeloma cell lines, without toxicity in normal mononuclear cells.	380.46	1093119-54-0	38	99.8791	<1		http://selleckchem.com/products/mkc-3946.html	C21H20N2O3S	free base	N/A	CN1CCN(CC1)C(=O)C2=CC=C(S2)C3=CC4=CC=C(O)C(=C4C=C3)C=O	3.39	2	1	3
S8288	VLX1570	e11	L2000-08	DUB	Ubiquitin	VLX1570 is a competitive inhibitor of proteasome DUB activity, with an IC50 of ~10?μM in vitro.	469.39	1431280-51-1	93	198.129	<1		http://selleckchem.com/products/vlx1570.html	C23H17F2N3O6	free base	N/A	[O-][N+](=O)C1=C(F)C=CC(=C1)\C=C2/CCN(C\C(=C/C3=CC=C(F)C(=C3)[N+]([O-])=O)C2=O)C(=O)C=C	4.385	2	0	5
S8292	Selonsertib (GS-4997)	f11	L2000-08	ASK	Apoptosis	GS-4997 is a highly selective and potent once-daily oral ASK1 inhibitor with potential anti-inflammatory, antineoplastic and anti-fibrotic activities.	445.49	1448428-04-3	36	80.8099	<1		http://selleckchem.com/products/selonsertib-gs-4997.html	C24H24FN7O	free base	N/A	CC(C)[N]1C=NN=C1C2=CC=CC(=N2)NC(=O)C3=CC(=C(C)C=C3F)[N]4C=NC(=C4)C5CC5	4.054	5	1	6
S8301	AS101	g11	L2000-08	Immunology & Inflammation related	Immunology & Inflammation	AS101, a potent in vitro and in vivo immunomodulator, is a novel inhibitor of IL-1beta converting enzyme.	312.05	106566-58-9	62	198.686	<1		http://selleckchem.com/products/as101.html	C2H8Cl3NO2Te	Coordination Co	N/A	[NH4+].Cl[Te-]1(Cl)(Cl)OCCO1	-0.379	2	0	0
S8302	SR-12813	h11	L2000-08	HMG-CoA Reductase	Metabolism	SR-12813 is a pregnane X receptor (PXR) agonist and HMG-CoA reductase inhibitor with an IC50 of 850 nM.	504.53	126411-39-0	100	198.204	<1		http://selleckchem.com/products/sr-12813.html	C24H42O7P2	free base	N/A	CCO[P](=O)(OCC)C(=CC1=CC(=C(O)C(=C1)C(C)(C)C)C(C)(C)C)[P](=O)(OCC)OCC	4.891	4	1	13
S8309	ATI-2341	a2	L2000-09	CXCR	GPCR & G Protein	ATI-2341, pepducin targeting the C-X-C chemokine receptor type 4 (CXCR4), is an allosteric agonist activating the inhibitory heterotrimeric G protein (Gi) to promote inhibition of cAMP production and induce calcium mobilization.	2256.82	1337878-62-2	100	44.3101	<1		http://selleckchem.com/products/ati-2341.html	C104H178N26O25S2	free base	N/A	CCCCCCCCCCCCCCCC(=O)NC(CCSC)C(=O)NCC(=O)NC(CC1=CC=C(O)C=C1)C(=O)NC(CCC(N)=O)C(=O)NC(CCCCN)C(=O)NC(CCCCN)C(=O)NC(CC(C)C)C(=O)NC(CCCNC(N)=N)C(=O)NC(CO)C(=O)NC(CCSC)C(=O)NC(C(C)O)C(=O)NC(CC(O)=O)C(=O)NC(CCCCN)C(=O)NC(CC2=CC=C(O)C=C2)C(=O)NC(CCCNC(N)=N)C(=O)NC(CC(C)C)C(O)=O	-5.119	19	28	89
S8321	MLR-1023	b2	L2000-09	Src	Protein Tyrosine Kinase	MLR-1023 is a Lyn kinase activator and a novel insulin receptor potentiator that elicits a rapid-onset and durable improvement in glucose homeostasis in animal models of type 2 diabetes.	202.21	41964-07-2	40	197.814	<1		http://selleckchem.com/products/mlr-1023.html	C11H10N2O2	free base	Tolimidone, CP-26154	CC1=CC=CC(=C1)OC2=CNC(=O)N=C2	1.443	3	1	2
S8322	LY3023414	c2	L2000-09	mTOR,PI3K,DNA-PK	PI3K/Akt/mTOR	LY3023414 is an oral ATP competitive inhibitor of the class I PI3K isoforms, mTOR and DNA-PK.	406.48	1386874-06-1	47	115.627	<1		http://selleckchem.com/products/ly3023414.html	C23H26N4O3	free base	GTPL8918	COC(C)CN1C(=O)N(C)C2=C1C3=CC(=CC=C3N=C2)C4=CC(=CN=C4)C(C)(C)O	1.883	4	0	5
S8330	IPI-549	d2	L2000-09	PI3K	PI3K/Akt/mTOR	IPI-549 is a potent inhibitor of PI3K-γ with >100-fold selectivity over other lipid and protein kinases. The biochemical IC50 for PI3K-γ is 16 nM.	528.56	1693758-51-8	100	189.193	<1		http://selleckchem.com/products/ipi-549.html	C30H24N8O2	free base	N/A	CC(NC(=O)C1=C2N=CC=C[N]2N=C1N)C3=CC4=CC=CC(=C4C(=O)N3C5=CC=CC=C5)C#CC6=C[N](C)N=C6	2.732	5	2	6
S8335	PF-06409577	e2	L2000-09	AMPK	PI3K/Akt/mTOR	PF-06409577 is orally bioavailable AMPK activator with EC50 of 7 nM for α1β1γ1 in the TR-FRET assay and it shows no detectable inhibition of hERG in a patch-clamp assay (100 μM) and was not an inhibitor (IC50 > 100 μM) of the microsomal activities of major human cytochrome P450 isoforms.	341.79	1467057-23-3	68	198.953	<1		http://selleckchem.com/products/pf-06409577.html	C19H16ClNO3	free base	N/A	OC(=O)C1=C[NH]C2=CC(=C(C=C12)C3=CC=C(C=C3)C4(O)CCC4)Cl	4.133	1	1	3
S8339	Miransertib (ARQ 092) HCl	f2	L2000-09	Akt	PI3K/Akt/mTOR	ARQ 092 is a novel, orally bioavailable and selective AKT pathway inhibitor exhibiting a manageable safety profile among patients with advanced solid tumors.	468.98	1313883-00-9	75	159.922	<1		http://selleckchem.com/products/arq-092.html	C27H25ClN6	hydrochloride	Miransertib	Cl.NC1=NC=CC=C1C2=NC3=CC=C(N=C3[N]2C4=CC=C(C=C4)C5(N)CCC5)C6=CC=CC=C6	4.98	3	2	4
S8352	PT2385	g2	L2000-09	HIF	Epigenetics	PT2385 is a <b>HIF-2α</b> antagonist with luciferase EC50 of 27 nM and no significant off-target activity.	383.34	1672665-49-4	77	200.866	<1		http://www.selleckchem.com/products/pt2385.html	C17H12F3NO4S	Free Base	N/A	C[S](=O)(=O)C1=CC=C(OC2=CC(=CC(=C2)F)C#N)C3=C1C(O)C(F)(F)C3	2.732	3	1	3
S8353	CPI-1205	h2	L2000-09	Histone Methyltransferase	Epigenetics	CPI-1205 is an orally available selective inhibitor of the histone lysine methyltransferase EZH2 with IC50 values of 2 nM and 52 nM for EZH2 and EZH1 respectively. It has potential antineoplastic activity.	518.57	1621862-70-1	100	192.838	<1		http://selleckchem.com/products/cpi-1205.html	C27H33F3N4O3	free base	CPI 1205, CPI1205	COC1=C(CNC(=O)C2=C(C)[N](C(C)C3CCN(CC3)CC(F)(F)F)C4=C2C=CC=C4)C(=O)NC(=C1)C	3.348	3	2	8
S8362	Irbinitinib (ARRY-380, ONT-380)	a3	L2000-09	HER2	Protein Tyrosine Kinase	ARRY-380 (ONT-380) is an oral, potent, selective, reversible and ATP-competitive small-molecule inhibitor of ErbB-2 (also called HER2) with IC50s of 8 nM and 7 nM for ErbB-2 and p95 HER2, respectively in cell-based assays, showing ~500-fold selective for HER2 vs EGFR. It has potential antineoplastic activity.	480.52	937263-43-9	96	199.784	<1		http://selleckchem.com/products/arry-380-ont-380.html	C26H24N8O2	free base	Tucatinib	CC1=CC(=CC=C1OC2=CC3=NC=N[N]3C=C2)NC4=NC=NC5=CC=C(NC6=NC(C)(C)CO6)C=C45	4.744	7	2	6
S8363	NMS-P118	b3	L2000-09	PARP	DNA Damage	NMS-P118 is a potent, orally available, and highly selective PARP-1 inhibitor endowed with excellent ADME and pharmacokinetic profiles, showing 150-fold selectivity for PARP-1 over PARP-2 (Kd 0.009 μM vs 1.39 μM, respectively).	395.42	1262417-51-5	24	60.695	<1		http://selleckchem.com/products/nms-p118.html	C20H24F3N3O2	free base	N/A	NC(=O)C1=CC(=CC2=C1C(=O)N(C2)C3CCN(CC3)C4CCC(F)(F)CC4)F	1.422	2	1	3
S8370	BGP-15 2HCl	c3	L2000-09	PARP	DNA Damage	BGP-15, is a nicotinic amidoxime derivative with PARP inhibitory activity. It has been demonstrated that BGP-15 protects against ischemia-reperfusion injury.	351.27	66611-37-8	70	199.277	70	199.277	http://selleckchem.com/products/bgp-15.html	C14H24Cl2N4O2	dihydrochloride	N/A	Cl.Cl.NC(=N\OCC(O)CN1CCCCC1)/C2=CC=CN=C2	1.097	3	2	6
S8372	AZD9496	d3	L2000-09	Estrogen/progestogen Receptor	Endocrinology & Hormones	AZD9496 is an oral estrogen receptor inhibitor that blocks the growth of ER-positive and ESR1 mutant breast tumours in preclinical models.	442.47	1639042-08-2	88	198.884	<1		http://selleckchem.com/products/azd9496.html	C25H25F3N2O2	free base	N/A	CC1CC2=C([NH]C3=CC=CC=C23)C(N1CC(C)(C)F)C4=C(F)C=C(\C=C\C(O)=O)C=C4F	2.903	1	1	5
S8387	MSC2530818	e3	L2000-09	CDK	Cell Cycle	MSC2530818, a CDK8 inhibitor with the IC50 of 2.6 nM, displays excellent kinase selectivity, biochemical and cellular potency, microsomal stability, and is orally bioavailable.	340.81	1883423-59-3	68	199.525	<1		http://selleckchem.com/products/msc2530818.html	C18H17ClN4O	free base	N/A	CC1=N[NH]C2=C1C=C(C=N2)C(=O)N3CCCC3C4=CC=C(Cl)C=C4	2.956	3	1	2
S8390	LXR-623 (WAY-252623)	f3	L2000-09	Liver X Receptor	Others	LXR-623 is a novel liver X-receptor(LXR) agonist with IC50 values of 179 nM and 24 nM for LXR-α and LXR-β, respectively. It is orally bioavailable and readily passes the blood-brain barrier.	422.78	875787-07-8	84	198.685	<1		http://selleckchem.com/products/lxr-623-way-252623.html	C21H12ClF5N2	free base	N/A	FC1=CC=C(C=C1)C2=C3C=CC=C(C3=N[N]2CC4=CC=C(F)C=C4Cl)C(F)(F)F	7.227	1	0	4
S8397	Eltanexor (KPT-8602)	g3	L2000-09	CRM1	Transmembrane Transporters	Eltanexor(KPT-8602) is a second-generation, orally bioavailable XPO1 (also known as CRM1) inhibitor with IC50 values of 20?211?nM in 10 AML lines after 3 days exposure.	428.29	1642300-52-4	85	198.464	<1		http://selleckchem.com/products/kpt-8602.html	C17H10F6N6O	free base	Eltanexor	NC(=O)/C(=C/[N]1C=NC(=N1)C2=CC(=CC(=C2)C(F)(F)F)C(F)(F)F)C3=CN=CN=C3	2.002	5	1	6
S8400	Mivebresib(ABBV-075)	h3	L2000-09	Epigenetic Reader Domain	Epigenetics	Mivebresib(ABBV-075) is a novel BET family bromodomain inhibitor. It binds bromodomains of BRD2/4/T with similar affinities (Ki of 1-2.2 nM) and highly selective for 18 bromodomain proteins tested (Kd > 1 μM more than 600-fold selectivity vs. BRD4), but exhibits roughly 10-fold weaker potency towards BRD3 (Ki of 12.2 nM) and has moderate activity towards CREBBP (Kd = 87 μM 54-fold selectivity vs.…	459.47	1445993-26-9	91	198.054	<1		http://selleckchem.com/products/mivebresib-abbv-075.html	C22H19F2N3O4S	free base	N/A	CC[S](=O)(=O)NC1=CC(=C(OC2=C(F)C=C(F)C=C2)C=C1)C3=CN(C)C(=O)C4=C3C=C[NH]4	3.027	4	2	6
S8404	S49076	a4	L2000-09	c-Met,FGFR,TAM Receptor	Protein Tyrosine Kinase	S49076 is a novel, potent inhibitor of MET, AXL/MER, and FGFR1/2/3 with IC50 values below 20 nmol/L.	438.5	1265965-22-7	87	198.404	<1		http://selleckchem.com/products/s49076.html	C22H22N4O4S	free base	N/A	O=C1CSC(=O)N1CC2=CC=C3NC(=O)C(=C\C4=CC(=C[NH]4)CN5CCOCC5)/C3=C2	1.882	4	2	5
S8405	RRx-001	b4	L2000-09	Dehydrogenase	Metabolism	RRx-001 is a novel epigenetic modulator with potential radiosensitizing activity. It inhibits glucose 6-phosphate dehydrogenase(G6PD) in human tumor cells, binds hemoglobin and drives RBC-mediated redox reactions under hypoxia.	268.02	925206-65-1	53	197.746	<1		http://selleckchem.com/products/rrx-001.html	C5H6BrN3O5	free base	N/A	[O-][N+](=O)C1(CN(C1)C(=O)CBr)[N+]([O-])=O	0.473	1	0	3
S8407	PF-06273340	c4	L2000-09	Trk receptor	Protein Tyrosine Kinase	PF-06273340 is a highly potent, kinases elective, well-tolerated pan-Trk inhibitor with IC50 values of 6, 4, 3 nM for TrkA, TrkB, Trk C, respectively.	479.92	1402438-74-7	95	197.95	<1		http://selleckchem.com/products/pf-06273340.html	C23H22ClN7O3	free base	N/A	CC(C)(CO)[N]1C=C(C(=O)C2=CN=CC(=C2)NC(=O)CC3=CC=C(Cl)C=N3)C4=CN=C(N)N=C14	1.582	6	3	7
S8412	Naquotinib(ASP8273)	d4	L2000-09	EGFR	Angiogenesis	Naquotinib(ASP8273) is an orally available, irreversible, mutant-selective, epidermal growth factor receptor (EGFR) inhibitor, with potential antineoplastic activity.	562.71	1448232-80-1	52	92.4099	<1		http://selleckchem.com/products/naquotinib-asp8273.html	C30H42N8O3	free base	N/A	CCC1=NC(=C(NC2=CC=C(C=C2)N3CCC(CC3)N4CCN(C)CC4)N=C1OC5CCN(C5)C(=O)C=C)C(N)=O	2.756	5	2	9
S8419	E7449	e4	L2000-09	PARP	DNA Damage	E7449 is an orally bioavailable, brain penetrable, small molecule dual inhibitor of PARP1/2 and also inhibits PARP5a/5b, otherwise known as tankyrase1 and 2 (TNKS1/2), important regulators of canonical Wnt/β-catenin signaling. It has IC50 values of 1.0 and 1.2 nM for PARP1 and 2, respectively.	317.34	1140964-99-3	4	12.6048	<1		http://selleckchem.com/products/e7449.html	C18H15N5O	free base	N/A	O=C1NN=C2NC(=NC3=C2C1=CC=C3)CN4CC5=C(C4)C=CC=C5	1.436	3	2	2
S8433	NS-398 (NS398)	f4	L2000-09	COX	Neuronal Signaling	NS-398 is a selective inhibitor of cyclooxygenase-2 (COX-2). The IC50 values for human recombinant COX-1 and -2 are 75 and 1.77 μM, respectively.	314.36	123653-11-2	62	197.226	<1		http://selleckchem.com/products/ns-398-ns398.html	C13H18N2O5S	free base	N-(2-cyclohexyloxy-4-nitrophenyl)methane sulfonamide	C[S](=O)(=O)NC1=C(OC2CCCCC2)C=C(C=C1)[N+]([O-])=O	2.477	3	1	5
S8444	KPT-9274	g4	L2000-09	NAMPT,PAK	Metabolism	KPT-9274 is an orally bioavailable small molecule that is a non-competitive dual inhibitor of PAK4 and NAMPT. It shows an IC50 of ~120 nM for NAMPT in a cell-free enzymatic assay.	610.62	1643913-93-2	100	163.768	<1		http://selleckchem.com/products/kpt-9274.html	C35H29F3N4O3	free base	N/A	NC1=NC=C(C=C1)\C=C\C(=O)NCC2=CC3=C(O2)C(=CC(=C3)C4=CC=C(C=C4)C(=O)N5CCC(F)(F)CC5)C6=CC=C(F)C=C6	5.59	4	2	7
S8452	BAY-876	h4	L2000-09	GLUT	Metabolism	BAY-876 is a potent and selective GLUT1 inhibitor (IC50=0.002 μM) with a selectivity factor of >100 against GLUT2, GLUT3, and GLUT4.	496.42	1799753-84-6	99	199.428	<1		http://selleckchem.com/products/bay-876.html	C24H16F4N6O2	free base	N/A	CC1=C(NC(=O)C2=CC(=NC3=CC(=CC=C23)F)C(N)=O)C(=N[N]1CC4=CC=C(C=C4)C#N)C(F)(F)F	4.065	4	2	6
S8457	UK-371804 HCl	a5	L2000-09	Serine Protease	Proteases	UK-371804 is a potent and selective urokinase-type plasmogen activator (uPA) inhibitor with excellent enzyme potency (Ki=10 nM) and selectivity profile (4000-fold versus tPA and 2700-fold versus plasmin).	422.29	256476-36-5	30	71.0412	<1		http://selleckchem.com/products/uk-371804-hcl.html	C14H17Cl2N5O4S	hydrochloride	UK-371804 HCl	Cl.CC(C)(N[S](=O)(=O)C1=CC2=C(C=C1)C(=CN=C2NC(N)=N)Cl)C(O)=O	1.326	4	3	6
S8459	TAK-063	b5	L2000-09	PDE	Metabolism	TAK-063 is a novel and selective phosphodiesterase 10A(PDE10A) inhibitor with an IC50 of 0.30 nM.	428.42	1238697-26-1	85	198.403	<1		http://selleckchem.com/products/tak-063.html	C23H17FN6O2	free base	Balipodect	COC1=CN(N=C(C1=O)C2=CC=N[N]2C3=CC=CC=C3)C4=CC=C(C=C4F)[N]5C=CC=N5	3.983	5	0	5
S8464	Citarinostat (ACY-241)	c5	L2000-09	HDAC	Epigenetics	Citarinostat (ACY-241) is an orally available selective HDAC6 inhibitor with IC50 of 2.6 nM and 46 nM for HDAC6 and HDAC3, respectively. It has 13 to 18-fold selectivity towards HDAC6 in comparison to HDAC1-3.	467.95	1316215-12-9	41	87.6162	<1		http://selleckchem.com/products/citarinostat-acy-241.html	C24H26ClN5O3	free base	HDAC-IN-2	ONC(=O)CCCCCCNC(=O)C1=CN=C(N=C1)N(C2=CC=CC=C2)C3=C(Cl)C=CC=C3	4.582	4	2	11
S8481	SRT3025 HCl	d5	L2000-09	Sirtuin	DNA Damage	SRT3025 is an orally available small molecule activator of the SIRT1 enzyme.	606.2	2070015-26-6	100	164.962	<1		http://selleckchem.com/products/srt3025.html	C31H32ClN5O2S2	hydrochloride	N/A	Cl.COCCCC1=C(N=C(S1)C2=CC=CC=C2)C(=O)NC3=CC=CC=C3C4=NC5=CC(=CN=C5S4)CN6CCCC6	5.849	5	1	10
S8483	CBL0137 (CBL-0137)	e5	L2000-09	p53,NF-κB	Apoptosis	CBL0137(CBL-0137) activates p53 and inhibits NF-kB with EC50s of 0.37 μM and 0.47 μM in the cell-based p53 and NF-kB reporter assays, respectively. It also inhibits histone chaperone FACT (facilitates chromatin transcription complex).	372.89	1197397-89-9	38	101.907	24	64.3621	http://selleckchem.com/products/cbl0137-cbl-0137.html	C21H25ClN2O2	hydrochloride	CBLC137, Curaxin 137	Cl.CC(C)NCC[N]1C2=C(C=C(C=C2)C(C)=O)C3=C1C=CC(=C3)C(C)=O	3.72	2	1	6
S8484	GSK2982772	f5	L2000-09	TNF-alpha,NF-κB	Apoptosis	GSK2982772 is an ATP competitive receptor-interacting protein-1 (RIP1) kinase inhibitor with the IC50 value of 1 nM. It has exquisite kinase specificity and excellent activity in blocking many TNF-dependent cellular responses.	377.4	1622848-92-3	75	198.728	<1		http://selleckchem.com/products/gsk2982772.html	C20H19N5O3	free base	N/A	CN1C(=O)C(COC2=CC=CC=C12)NC(=O)C3=N[NH]C(=N3)CC4=CC=CC=C4	1.639	5	2	4
S8490	Tanzisertib(CC-930)	g5	L2000-09	JNK	MAPK	CC-930 is kinetically competitive with ATP in the JNK-dependent phosphorylation of the protein substrate c-Jun and potent against all isoforms of JNK (Ki(JNK1) = 44 ± 3 nM, IC50(JNK1) = 61 nM, Ki(JNK2) = 6.2 ± 0.6 nM, IC50(JNK2) = 5 nM, IC50(JNK3) = 5 nM) and selective against MAP kinases ERK1 and p38a with IC50 of 0.48 and 3.4 μM respectively.	484.9	899805-25-5 (free base)	89	183.543	4	8.24912	http://selleckchem.com/products/cc-930.html	C21H24ClF3N6O2	hydrochloride	JNK-930|JNKI-1	Cl.OC1CCC(CC1)NC2=NC3=C(C=N2)N=C(NC4=C(F)C=C(F)C=C4F)[N]3C5CCOC5	3.791	4	3	5
S8493	PD-166866 (PD166866)	h5	L2000-09	FGFR	Angiogenesis	PD-166866 is a synthetic molecule inhibiting the tyrosin kinase action of FGFR1, shows a very high selectivity towards FGFR1 and inhibits the auto-phosphorylation activity of FGRF1.	396.44	192705-79-6	14	35.3143	<1		http://selleckchem.com/products/pd-166866.html	C20H24N6O3	free base	N/A	COC1=CC(=CC(=C1)C2=CC3=C(N=C(N)N=C3)N=C2NC(=O)NC(C)(C)C)OC	2.279	6	3	5
S8503	BLU-554 (BLU554)	a6	L2000-09	FGFR	Angiogenesis	BLU-554 is a potent, highly-selective, oral FGFR4 inhibitor with an IC50 value of 5 nM. The IC50s for FGFR1-3 is 624-2203 nM.	503.38	1707289-21-1	100	198.657	<1		http://selleckchem.com/products/blu-554.html	C24H24Cl2N4O4	free base	N/A	COC1=CC(=C(Cl)C(=C1Cl)C2=CC3=C(C=C2)N=C(NC4COCCC4NC(=O)C=C)N=C3)OC	4.229	6	2	7
S8511	Belizatinib (TSR-011)	b6	L2000-09	ALK,Trk receptor	Protein Tyrosine Kinase	Belizatinib (TSR-011) is a potent inhibitor of ALK (IC50=0.7 nM) and tropomyosin receptor kinase (TRK) (IC50 values less than 3 nM for TRK A, B, and C).	577.73	1357920-84-3	100	173.091	<1		http://selleckchem.com/products/tsr-011-belizatinib.html	C33H44FN5O3	free base	N/A	CC(C)NC(=O)C1CCC(CC1)N2C(NC3=CC=C(CN4CCC(CC4)C(C)(C)O)C=C23)=NC(=O)C5=CC=C(F)C=C5	4.827	3	2	7
S8519	A-317491	c6	L2000-09	P2 Receptor	Neuronal Signaling	A-317491 is a novel potent and selective non-nucleotide antagonist of P2X3 and P2X2/3 receptors with Ki values of 22 nM and 9 nM for human P2X3 and P2X2/3 receptors.	565.57	475205-49-3	100	176.813	<1		http://selleckchem.com/products/a-317491.html	C33H27NO8	free base	N/A	OC(=O)C1=C(C=C(C(=O)N(CC2=CC(=CC=C2)OC3=CC=CC=C3)C4CCCC5=C4C=CC=C5)C(=C1)C(O)=O)C(O)=O	5.876	5	0	9
S8523	GSK2256098	d6	L2000-09	FAK	Angiogenesis	GSK2256098 is a potent, selective, reversible, and ATP competitive FAK kinase inhibitor with apparent Ki of 0.4 nM.	414.89	1224887-10-8	82	197.643	<1		http://selleckchem.com/products/gsk2256098.html	C20H23ClN6O2	free base	GTPL7939	CONC(=O)C1=CC=CC=C1NC2=C(Cl)C=NC(=C2)NC3=CC(=N[N]3C(C)C)C	3.82	4	3	7
S8526	GDC-0575 (ARRY-575, RG7741)	e6	L2000-09	Chk	Cell Cycle	GDC-0575 (ARRY-575, RG7741) is a potent and selective <b>CHK1</b> inhibitor with an IC50 of 1.2 nM.	378.27	1196541-47-5	75	198.271	<1		http://www.selleckchem.com/products/gdc-0575.html	C16H20BrN5O	Free Base	N/A	NC1CCCN(C1)C2=C(Br)C=NC3=C2C(=C[NH]3)NC(=O)C4CC4	1.621	2	3	3
S8534	LY3214996	f6	L2000-09	ERK	MAPK	LY3214996 is a selective and novel ERK1/2 inhibitor with IC50 of 5 nM for both enzymes in biochemical assays. It potently inhibits cellular phospho-RSK1 in BRAF and RAS mutant cancer cell lines.	453.56	1951483-29-6	27	59.5291	<1		http://selleckchem.com/products/ly3214996.html	C22H27N7O2S	free base	N/A	C[N]1N=CC=C1NC2=NC(=CC=N2)C3=CC4=C(S3)C(C)(C)N(CCN5CCOCC5)C4=O	2.664	5	1	6
S8538	PF-06651600	g6	L2000-09	JAK	JAK/STAT	PF-06651600 is a potent and irreversible JAK3-selective inhibitor with an IC50 of 33.1 nM but without activity (IC50 > 10 000 nM) against JAK1, JAK2, and TYK2.	285.34	1792180-81-4	57	199.762			http://selleckchem.com/products/pf-06651600.html	C15H19N5O	free base	N/A	CC1CCC(CN1C(=O)C=C)NC2=C3C=C[NH]C3=NC=N2	1.854	3	2	3
S8555	Asciminib (ABL001)	h6	L2000-09	Bcr-Abl	Angiogenesis	Asciminib(ABL001) is a potent and selective allosteric ABL1 inhibitor with dissociation constant (Kd) of?0.5-0.8?nM and selectivity to the myristoyl pocket of ABL1.	449.84	1492952-76-7	89	197.848			http://selleckchem.com/products/asciminib-abl001.html	C20H18ClF2N5O3	free base	N/A	OC1CCN(C1)C2=C(C=C(C=N2)C(=O)NC3=CC=C(OC(F)(F)Cl)C=C3)C4=CC=N[NH]4	4.196	4	3	6
S8560	Seletalisib (UCB-5857)	a7	L2000-09	PI3K	PI3K/Akt/mTOR	Seletalisib is a novel small-molecule inhibitor of <b>PI3Kδ</b> with an IC50 value of 12 nM and shows significant selectivity to PI3Kδ with respect to the other class I PI3K isoforms (between 24- and 303-fold).	482.85	1362850-20-1	97	200.891	<1		http://www.selleckchem.com/products/seletalisib-ucb-5857.html	C23H14ClF3N6O	Free Base	N/A	[O-][N+]1=CC=CC(=C1)C2=NC3=C(Cl)C=CC=C3C=C2C(NC4=C5N=CC=CC5=NC=N4)C(F)(F)F	4.436	4	1	5
S8562	CA-4948	b7	L2000-09	TLR,IL Receptor	Immunology & Inflammation	CA-4948 is a reversible kinase inhibitor that modulates IRAK4 function in both the toll-like receptor (TLR) and interleukin 1 receptor (IL-1R) signaling cascades, and demonstrates pharmacodynamic and antitumor activity in in vitro and in vivo nonclinical models.	417.42	1801343-74-7	30	71.8701	<1		http://selleckchem.com/products/ca-4948.html	C21H19N7O3	free base	N/A	NC1=CC=C(C=N1)C2=CC=CC(=N2)C(=O)NC3=CC4=C(N=C3)N=C(O4)N5CCOCC5	1.443	7	2	4
S8564	Verubecestat (MK-8931)	c7	L2000-09	BACE	Neuronal Signaling	Verubecestat (MK-8931) is a potent and selective beta-secretase (also known as Beta-site APP-cleaving enzyme 1) inhibitor.	409.41	1286770-55-5	81	197.846	<1		http://selleckchem.com/products/verubecestat.html	C17H17F2N5O3S	free base	N/A	CN1C(=N)NC(C)(C[S]1(=O)=O)C2=CC(=CC=C2F)NC(=O)C3=CC=C(F)C=N3	1.314	4	2	3
S8570	RXDX-106 (CEP-40783)	d7	L2000-09	TAM Receptor	Protein Tyrosine Kinase	RXDX-106 (CEP-40783) is an orally-available, potent and selective TAM(TYRO3, AXL, MER)/MET inhibitor displaying low nanomolar biochemical activity and slow (T1/2 >120 min) inhibitor off-rate in peptide phosphorylation assays and in vitro kinase binding assays, respectively.	588.56	1437321-24-8	10	16.9906	<1		http://selleckchem.com/products/rxdx-106-cep-40783.html	C31H26F2N4O6	free base	N/A	COC1=CC2=C(C=C1OC)C(=CC=N2)OC3=C(F)C=C(NC(=O)C4=CN(C(C)C)C(=O)N(C4=O)C5=CC=C(F)C=C5)C=C3	4.572	7	1	8
S8572	Amcasertib (BBI503)	e7	L2000-09	Stemness kinase	Stem Cells & Wnt	Amcasertib (BBI503), a first-in-class cancer stemness kinase inhibitor, is claimed to inhibit Nanog and other CSC pathways by targeting kinases with potential anticancer activity.	539.69	1129403-56-0	14	25.9408	<1		http://selleckchem.com/products/amcasertib-bbi503.html	C31H33N5O2S	free base	N/A	CCN(CC)CCNC(=O)C1=C(C)[NH]C(=C1C)\C=C/2C(=O)NC3=CC=C(C=C23)C4=CSC(=N4)C5=CC=CC=C5	5.119	3	3	9
S8573	Sitravatinib (MGCD516)	f7	L2000-09	Ephrin receptor,c-Kit,TAM Receptor,VEGFR,Trk receptor	Protein Tyrosine Kinase	Sitravatinib (MGCD516) is a novel small molecule inhibitor targeting multiple RTKs involved in driving sarcoma cell growth, including c-Kit, PDGFRβ, PDGFRα, c-Met, and Axl.	629.68	1123837-84-2	100	158.811	<1		http://selleckchem.com/products/sitravatinib-mgcd516.html	C33H29F2N5O4S	free base	MG-516	COCCNCC1=CC=C(N=C1)C2=CC3=C(S2)C(=CC=N3)OC4=CC=C(NC(=O)C5(CC5)C(=O)NC6=CC=C(F)C=C6)C=C4F	5.029	6	3	12
S8578	PRN1371	g7	L2000-09	FGFR	Angiogenesis	PRN1371 is an irreversible covalent FGFR1-4 kinase inhibitor, with IC50s of 0.6, 1.3, 4.1, 19.3 and 8.1 nM for FGFR1, 2, 3, 4 and CSF1R, respectively.	561.46	1802929-43-6	100	178.107	<1		http://selleckchem.com/products/prn1371.html	C26H30Cl2N6O4	free base	N/A	CNC1=NC=C2C=C(C(=O)N(CCCN3CCN(CC3)C(=O)C=C)C2=N1)C4=C(Cl)C(=CC(=C4Cl)OC)OC	3.438	6	1	9
S8580	COTI-2	h7	L2000-09	p53	Apoptosis	COTI-2 is an orally available third generation thiosemicarbazone and activator of mutant forms of the p53 protein, with potential antineoplastic activity.	366.48	1039455-84-9	73	199.192	<1		http://selleckchem.com/products/coti-2.html	C19H22N6S	free base	N/A	S=C(N\N=C/1CCCC2=C1N=CC=C2)N3CCN(CC3)C4=NC=CC=C4	3.825	3	1	4
S8581	Serabelisib (INK-1117,MLN-1117,TAK-117)	a8	L2000-09	PI3K	PI3K/Akt/mTOR	Serabelisib (INK-1117,MLN-1117,TAK-117) is a potent and selective oral PI3Kα isoform inhibitor (IC50 of 21 nmol/L against PI3Kα) that has demonstrated > 100-fold selectivity relative to other class I PI3K family members (PI3Kβ/γ/δ) and mTOR, and a high degree of selectivity against many other kinase.	363.37	1268454-23-4	16	44.0323	<1		http://selleckchem.com/products/tak-117-ink-1117-mln-1117.html	C19H17N5O3	free base	N/A	NC1=NC2=C(O1)C=CC(=C2)C3=C[N]4C(=NC=C4C(=O)N5CCOCC5)C=C3	0.939	5	1	2
S8583	TPX-0005	b8	L2000-09	Src,ALK	Protein Tyrosine Kinase	TPX-0005 is a novel ALK/ROS1/TRK inhibitor with the IC50 values of 1.01 nM for WT ALK, 1.26 nM for ALK(G1202R), and 1.08 nM for ALK(L1196M) also a potent SRC inhibitor (IC50 5.3 nM).	355.37	1802220-02-5	70	196.978	<1		http://selleckchem.com/products/tpx-0005.html	C18H18FN5O2	free base	N/A	CC1CNC(=O)C2=C3N=C(NC(C)C4=C(O1)C=CC(=C4)F)C=C[N]3N=C2	2.005	4	2	0
S8589	SF2523	c8	L2000-09	PI3K,DNA-PK,Epigenetic Reader Domain,mTOR	PI3K/Akt/mTOR	SF2523 is a highly selective and potent inhibitor of PI3K with IC50 values of 34 nM, 158 nM, 9 nM, 241 nM and 280 nM for PI3Kα, PI3Kγ, DNA-PK, BRD4 and mTOR, respectively.	371.41	1174428-47-7	29	78.0808	<1		http://selleckchem.com/products/sf2523.html	C19H17NO5S	free base	N/A	O=C1C=C(OC2=C1SC=C2C3=CC=C4OCCOC4=C3)N5CCOCC5	3.081	5	0	2
S8592	Pamiparib (BGB-290)	d8	L2000-09	PARP	DNA Damage	Pamiparib (BGB-290) is a potent and selective inhibitor of <b>PARP1</b> and <b>PARP2</b> with IC50 values of 0.83 and 0.11 nM, respectively in biochemical assays. It shows high selectivity over other PARP enzymes.	298.31	1446261-44-4	59	197.781	<1		http://www.selleckchem.com/products/bgb-290.html	C16H15FN4O	Free Base	N/A	CC12CCCN1CC3=NNC(=O)C4=CC(=CC5=C4C3=C2[NH]5)F	2.078	2	2	0
S8598	S 38093	e8	L2000-09	Histamine Receptor	Neuronal Signaling	S 38093 is a histamine H3 antagonist/inverse agonist with a moderate affinity for rat, mouse and human H3 receptors (Ki = 8.8, 1.44 and 1.2 μM, respectively) and no affinity for other histaminergic receptors.	288.38	862896-30-8	57	197.656	<1		http://selleckchem.com/products/S-38093.html	C17H24N2O2	free base	N/A	NC(=O)C1=CC=C(OCCCN2CC3CCCC3C2)C=C1	2.201	2	1	6
S8603	NGP 555	f8	L2000-09	Gamma-secretase	Neuronal Signaling	NGP 555 is a small-molecule modulator of γ-secretase and has been successful in achieving good oral absorption, brain penetration, CNS activity, and specificity for a lipid-based membrane target preclinically.	406.52	1304630-27-0	40	98.3961	<1		http://selleckchem.com/products/npg-555.html	C23H23FN4S	free base	N/A	CCC1=C(C)C=C(C)C(=C1)NC2=NC(=CS2)C3=CC=C([N]4C=NC(=C4)C)C(=C3)F	6.396	2	1	5
S8605	C188-9	g8	L2000-09	STAT	JAK/STAT	C188-9 is a potent inhibitor of STAT3 that binds to STAT3 with high affinity (KD=4.7±0.4 nM). C188-9 is well tolerated in mice, shows good oral bioavailability, and is concentrated in tumors.	471.52	432001-19-9	94	199.355	<1		http://selleckchem.com/products/c188-9.html	C27H21NO5S	free base	N/A	COC1=CC=C(C=C1)[S](=O)(=O)NC2=CC(=C(O)C3=CC=CC=C23)C4=C(O)C=CC5=C4C=CC=C5	5.152	3	3	5
S8608	Adenosine Dialdehyde (ADOX)	h8	L2000-09	Transferase	Metabolism	Adenosine Dialdehyde (ADOX) is an adenosine analog and S-adenosylmethionine-dependent methyltransferase inhibitor with an IC50 of 40 nM.	265.23	34240-05-6	19	71.6359	3	11.3109	http://selleckchem.com/products/adenosine-dialdehyde-adox.html	C10H11N5O4	free base	N/A	NC1=NC=NC2=C1N=C[N]2C(OC(CO)C=O)C=O	-1.346	6	2	6
S8609	Derazantinib(ARQ-087)	a9	L2000-09	FGFR	Protein Tyrosine Kinase	Derazantinib(ARQ-087) is an orally bioavailable inhibitor of the <b>fibroblast growth factor receptor (FGFR)</b> with IC50 values of 1.8 nM for FGFR2, and 4.5 nM for FGFR1 and 3, showing lower potency for FGFR4 (IC50=34 nM). It also inhibits RET, DDR2, PDGFRβ, VEGFR and KIT.	468.57	1234356-69-4	93	198.476	<1		http://www.selleckchem.com/products/derazantinib.html	C29H29FN4O	Free Base	N/A	COCCNCCC1=CC(=CC=C1)NC2=NC3=C(CC(C4=CC=CC=C4F)C5=C3C=CC=C5)C=N2	5.887	3	2	9
S8611	Vorasidenib (AG-881)	b9	L2000-09	Dehydrogenase	Metabolism	Vorasidenib (AG-881) is an orally available inhibitor of mutated forms of both isocitrate dehydrogenase 1 and 2 (IDH1 and IDH2).	414.74	1644545-52-7	82	197.714	<1		http://selleckchem.com/products/ag-881.html	C14H13ClF6N6	free base	N/A	CC(NC1=NC(=NC(=N1)C2=CC=CC(=N2)Cl)NC(C)C(F)(F)F)C(F)(F)F	5.146	4	2	7
S8629	BMS-986205	c9	L2000-09	IDO1	others	BMS-986205 is a selective indoleamine 2,3-dioxygenase 1 (IDO1) inhibitor.	410.91	1923833-60-6	82	199.557	<1		http://selleckchem.com/products/.html	C24H24ClFN2O	free base	N/A	CC(C1CCC(CC1)C2=CC=NC3=C2C=C(F)C=C3)C(=O)NC4=CC=C(Cl)C=C4	6.125	2	1	4
S8640	Reparixin (Repertaxin)	d9	L2000-09	CXCR	Immunology & Inflammation	Reparixin(Repertaxin) is a inhibitor of human CXCR1/R2 and rat CXCR2 receptor activation. It also inhibits human CXCL8 receptor activation.	283.39	266359-83-5	56	197.608	<1		http://selleckchem.com/products/reparixin-repertaxin.html	C14H21NO3S	free base	N/A	CC(C)CC1=CC=C(C=C1)C(C)C(=O)N[S](C)(=O)=O	2.76	3	1	5
S8648	ACY-738	e9	L2000-09	HDAC	Epigenetics	ACY-738 inhibits HDAC6 with low nanomolar potency (IC50=1.7 nM) and a selectivity of 60- to 1500-fold over class I HDACs.	270.29	1375465-91-0	54	199.785	<1		http://selleckchem.com/products/acy-738.html	C14H14N4O2	free base	N/A	ONC(=O)C1=CN=C(NC2(CC2)C3=CC=CC=C3)N=C1	1.325	3	2	4
S8657	PF-06840003	f9	L2000-09	IDO	Metabolism	PF-06840003 is a highly selective orally bioavailable IDO-1 inhibitor. Although it has moderate hIDO1 enzyme inhibition (IC50 0.41 μM), it is a highly efficient compound (LE 0.53, LipE 5.1), driven by its tight packing within the enzyme, as well as the high density of hydrogen bonds it forms with hIDO-1 despite its small size.	232.21	198474-05-4	46	198.097	<1		http://selleckchem.com/products/pf-06840003.html	C12H9FN2O2	free base	EOS200271	FC1=CC=C2[NH]C=C(C3CC(=O)NC3=O)C2=C1	1.201	2	2	1
S8664	GSK3326595 (EPZ015938)	g9	L2000-09	Histone Methyltransferase	Epigenetics	GSK3326595 (EPZ015938) is an orally active, potent and selective inhibitor of protein arginine methyltransferase 5 (PRMT5) and potently inhibits tumor growth in vitro and in vivo in animal models.	452.55	1616392-22-3	90	198.873	<1		http://selleckchem.com/products/gsk3326595-epz015938.html	C24H32N6O3	free base	N/A	CC(=O)N1CCC(CC1)NC2=CC(=NC=N2)C(=O)NCC(O)CN3CCC4=C(C3)C=CC=C4	0.692	4	3	7
S8666	BAY 1895344 (BAY-1895344)	h9	L2000-09	ATM/ATR	DNA Damage	BAY 1895344 is a potent, highly selective and orally available ATR inhibitor with an IC50 of 7 nM.	411.89	1876467-74-1(free base)	82	199.082	82	199.082	http://selleckchem.com/products/bay-1895344.html	C20H22ClN7O	hydrochloride	N/A	Cl.CC1COCCN1C2=CC(=C3C=CN=C(C4=CC=N[NH]4)C3=N2)C5=CC=N[N]5C	3.156	5	1	3
S8672	Tenalisib (RP6530)	a10	L2000-09	PI3K	PI3K/Akt/mTOR	Tenalisib (RP6530) is a potent and selective dual PI3Kδ/γ inhibitor with IC50 values of 24.5 nM and 33.2 nM for PI3Kδ and PI3Kγ, respectively. Its selectivity over α and β isoforms are more than 300-fold and 100-fold, respectively.	415.42	1639417-53-0	75	180.54	<1		http://selleckchem.com/products/tenalisib-rp6530.html	C23H18FN5O2	free base	N/A	CCC(NC1=C2N=C[NH]C2=NC=N1)C3=C(C(=O)C4=CC=CC=C4O3)C5=CC=CC(=C5)F	4.07	5	2	5
S8673	ONC212	b10	L2000-09	Others	Others	ONC212, a fluorinated-ONC201 analogue, is broadly efficacious across most solid tumors and hematological malignancies in the low nanomolar range and has robust anti-leukemic activity.	440.46	1807861-48-8	88	199.791	<1		http://selleckchem.com/products/onc212.html	C24H23F3N4O	free base	N/A	FC(F)(F)C1=CC=C(CN2C(=O)C3=C(CCN(CC4=CC=CC=C4)C3)N5CCN=C25)C=C1	3.668	2	0	5
S8675	H3B-6527	c10	L2000-09	FGFR	Protein Tyrosine Kinase	H3B-6527 is a highly selective covalent FGFR4 inhibitor with an IC50 value of <1.2 nM and at least 250-fold selectivity over FGFR1-3 (IC50 values of 320, 1,290 and 1,060 nM respectively).	629.54	1702259-66-2	50	79.4231	<1		http://selleckchem.com/products/h3b-6527.html	C29H34Cl2N8O4	free base	N/A	CCN1CCN(CC1)C2=CC(=C(NC3=CC(=NC=N3)N(C)C(=O)NC4=C(Cl)C(=CC(=C4Cl)OC)OC)C=C2)NC(=O)C=C	5.16	6	3	10
S8680	AZD1390	d10	L2000-09	ATM/ATR	PI3K/Akt/mTOR	AZD1390 is a first-in-class orally available and CNS penetrant ATM inhibitor with an IC50 of 0.78 nM in cells and >10,000-fold selectivity over closely related members of the PIKK family of enzymes and excellent selectivity across a broad panel of kinases.	477.57	2089288-03-7	14	29.3151	<1		http://selleckchem.com/products/azd1390.html	C27H32FN5O2	free base	N/A	CC(C)N1C(=O)N(C)C2=C1C3=CC(=C(F)C=C3N=C2)C4=CC=C(OCCCN5CCCCC5)N=C4	4.231	4	0	7
S8685	AS1517499	e10	L2000-09	STAT	JAK/STAT	AS1517499 is a novel and potent STAT6 inhibitor with an IC50 value of 21 nM.	397.86	919486-40-1	79	198.562	<1		http://selleckchem.com/products/as1517499.html	C20H20ClN5O2	free base	N/A	NC(=O)C1=CN=C(NCCC2=CC=C(O)C(=C2)Cl)N=C1NCC3=CC=CC=C3	3.641	3	4	8
S8689	RGX-104	f10	L2000-09	Liver X Receptor	Metabolism	RGX-104 is a orally bioavailable <b>liver X receptor</b> agonist that modulates innate immunity via transcriptional activation of the ApoE gene.	632.54	610318-03-1	100	158.093	<1		http://www.selleckchem.com/products/rgx-104.html	C34H34Cl2F3NO3	Free Base	N/A	Cl.CC(CCOC1=CC=CC(=C1)CC(O)=O)N(CC(C2=CC=CC=C2)C3=CC=CC=C3)CC4=CC=CC(=C4Cl)C(F)(F)F	5.85	2	0	14
S8698	GLPG1837	g10	L2000-09	CFTR	Transmembrane Transporters	GLPG1837 is a novel CFTR potentiator with an EC50 value of 3 nM for F508del, showing enhanced efficacy on CFTR mutants harboring class III mutations compared to Ivacaftor.	348.42	1654725-02-6	69	198.037	<1		http://selleckchem.com/products/glpg1837.html	C16H20N4O3S	free base	ABBV-974	CC1(C)CC2=C(SC(=C2C(N)=O)NC(=O)C3=N[NH]C=C3)C(C)(C)O1	1.611	4	3	3
S8699	SNS-314 Mesylate	h10	L2000-09	Aurora Kinase	Cell Cycle	SNS-314 Mesylate is a potent and selective inhibitor of Aurora A, Aurora B and Aurora C with IC50 of 9 nM, 31 nM, and 3 nM, respectively and less potent to Trk A/B, Flt4, Fms, Axl, c-Raf and DDR2.	527.04	1146618-41-8	100	189.739	<1		http://selleckchem.com/products/sns-314.html	C18H15ClN6OS2	0	N/A	ClC1=CC=CC(=C1)NC(=O)NC2=NC=C(CCNC3=NC=NC4=C3SC=C4)S2	3.953	4	3	6
S1494	Ralimetinib (LY2228820)	a11	L2000-09	p38 MAPK	MAPK	Ralimetinib (LY2228820) is a novel and potent inhibitor of p38 MAPK with IC50 of 7 nM in a cell-free assay, does not alter p38 MAPK activation. Phase 1/2.	612.74	862507-23-1	4	6.52805	100	163.201	http://selleckchem.com/products/LY2228820.html	C26H37FN6O6S2	Mesylate	N/A	CC(C)(C)C[N]1C(=NC2=C1N=C(C=C2)C3=C(N=C([NH]3)C(C)(C)C)C4=CC=C(F)C=C4)N.C[S](O)(=O)=O.C[S](O)(=O)=O	5.117	3	2	5
S2877	L-NAME HCl	b11	L2000-09	NOS	Immunology & Inflammation	L-NAME is a nonselective inhibitor of nitric oxide synthetases (NOS) for nNOS (bovine), eNOS (human), and iNOS (murine), with Ki of 15 nM, 39 nM and 4.4 μM, respectively.	269.69	51298-62-5	<1		54	200.23	http://selleckchem.com/products/l-name-hcl.html	C7H16ClN5O4	Hydrochloride	N/A	Cl.COC(=O)C(N)CCCNC(=N)N[N+]([O-])=O	1.463	2	3	9
S2879	AMD3465 hexahydrobromide	c11	L2000-09	CXCR	GPCR & G Protein	AMD3465 is a monomacrocyclic CXCR4 antagonist.	896.07	185991-07-5, 185991-24-6 (free base)	2	2.23197	98	109.366	http://selleckchem.com/products/amd3465.html	C24H44Br6N6	HBr	N/A	Br.Br.Br.Br.Br.Br.C1CNCCNCCCN(CCNC1)CC2=CC=C(CNCC3=NC=CC=C3)C=C2	3.787	1	4	6
S3793	Phytic acid	d11	L2000-09	Others	Others	Phytic acid is the principal storage form of phosphorus in many plant tissues, especially bran and seeds. It can act as a cofactor in DNA repair by nonhomologous end-joining.	660.04	83-86-3	<1		100	151.506	http://selleckchem.com/products/phytic-acid.html	C6H18O24P6	free base	inositol polyphosphate, inositol hexakisphosphate	O[P](O)(=O)OC1C(O[P](O)(O)=O)C(O[P](O)(O)=O)C(O[P](O)(O)=O)C(O[P](O)(O)=O)C1O[P](O)(O)=O	0	0	0	0
S4130	Mildronate	e11	L2000-09	Hydroxylase	Metabolism	Mildronate is an inhibitor of biosynthesis of L-carnitine by gamma-butyrobetaine (GBB) hydroxylase and as a competitive inhibitor of renal carnitine reabsorption.	147.19	86426-17-7	<1		29	197.024	http://selleckchem.com/products/mildronate.html	C6H15N2O2+	free base	N/A	C[N+](C)(C)NCCC(O)=O	-1.797	1	1	4
S4702	Sarcosine	f11	L2000-09	NMDAR,GlyT	Neuronal Signaling	Sarcosine is a competitive inhibitor of the type I glycine transporter (GlyT1) and an N-methyl-D-aspartate receptor (NMDAR) co-agonist.	89.09	107-97-1	<1		17	190.818	http://selleckchem.com/products/sarcosine.html	C3H7NO2	free base	N-methylglycine, Sarcosinic acid, Methylaminoacetic acid, Methylglycine	CNCC(O)=O	-3.439	1	1	2
S4962	Agmatine sulfate	g11	L2000-09	NOS	Immunology & Inflammation	Agmatine sulfate is a bioactive metabolite of the arginine amino acid. It has been shown to increase nitric oxide, reduce blood sugar levels and even increase growth hormone levels.	228.27	2482-00-0	<1		45	197.135	http://selleckchem.com/products/agmatine-sulfate.html	C5H16N4O4S	0	N/A	NCCCCNC(N)=N.O[S](O)(=O)=O	-1.576	0	3	5
S4972	Choline Glycerophosphate	h11	L2000-09	Others	Others	Choline Glycerophosphate is a choline derivative and one of the two major forms of choline storage (along with phosphocholine) in the cytosol.	257.22	28319-77-9	2	7.77545	51	198.274	http://selleckchem.com/products/choline-glycerophosphate.html	C8H20NO6P	0	Glycerophosphorylcholine	C[N+](C)(C)CCO[P]([O-])(=O)OCC(O)CO	-4.131	2	2	8
S8711	ARQ 531	a2	L2000-10	BTK	Tyrosine-Kinase	ARQ 531 is a reversible non-covalent inhibitor of Bruton’s Tyrosine Kinase (BTK), with IC50s of 0.85 nM and 0.39 nM for WT BTK and C481S BTK, respectively	478.93	2095393-15-8	95	198.359	<1		http://selleckchem.com/products/.html	C25H23ClN4O4	free base	N/A	OCC1CCC(CO1)NC2=C3C(=NC=N2)[NH]C=C3C(=O)C4=CC=C(OC5=CC=CC=C5)C=C4Cl	4.368	5	3	7
S8714	INCB057643	b2	L2000-10	Epigenetic Reader Do	Epigenetics	INCB057643 is a <b>BET</b> inhibitor that binds to the acetylated lysine recognition motifs found in the BRD of BET proteins, thereby preventing the interaction between the BET proteins and acetylated lysines on histones.	415.46	1820889-23-3	83	199.779	<1		http://www.selleckchem.com/products/incb057643.html	C20H21N3O5S	Free Base	N/A	CN1C=C(C2=C([NH]C=C2)C1=O)C3=CC(=CC4=C3OC(C)(C)C(=O)N4C)[S](C)(=O)=O	1.114	5	1	2
S8721	DCC-2618	c2	L2000-10	c-Kit	Protein Tyrosine Kinase	DCC-2618 is an orally bioavailable switch pocket control inhibitor of wild-type and mutated forms of KIT and PDGFR with potential antineoplastic activity. It also inhibits several other kinases, including VEGFR2, TIE2, PDGFR-beta and CSF1R, thereby further inhibiting tumor cell growth.	489.47	1225278-16-9	97	198.174	<1		http://selleckchem.com/products/dcc-2618.html	C26H21F2N5O3	0	N/A	C[N]1C=C(C=N1)C2=NC=CC(=C2)OC3=CC(=C(NC(=O)C4(CC4)C(=O)NC5=CC=CC=C5)C=C3F)F	3.841	5	2	7
S8723	ABBV-744	d2	L2000-10	Epigenetic Reader Do	Epigenetics	ABBV-744 is a BDII-selective <b>BET bromodomain</b> inhibitor that inhibits BRD2, BRD3 and BRD4. It is developed for treating AML and cancers.	491.55	2138861-99-9	98	199.369	<1		http://www.selleckchem.com/products/abbv-744.html	C28H30FN3O4	Free Base	N/A	CCNC(=O)C1=CC2=C([NH]1)C(=O)N(C)C=C2C3=C(OC4=C(C)C=C(F)C=C4C)C=CC(=C3)C(C)(C)O	4.36	3	2	6
S8727	Atuveciclib (BAY-1143572)	e2	L2000-10	CDK	Cell Cycle	Atuveciclib (BAY-1143572) is potent and highly selective <b>PTEFb/CDK9</b> inhibitor with <b>IC50</b> values of 13 nM for CDK9/CycT and the ratio of IC50 values for CDK2/CDK9 is about 100. Outside the CDK family, It inhibits GSK3 kinase with IC50 values of 45 nM and 87 nM for GSK3α and GSK3β respectively.	387.43	1414943-88-6	77	198.746	<1		http://www.selleckchem.com/products/atuveciclib-bay-1143572.html	C18H18FN5O2S	Free Base	N/A	COC1=CC(=CC=C1C2=NC(=NC=N2)NC3=CC(=CC=C3)C[S](C)(=N)=O)F	3.699	5	1	6
S8729	AZ32	f2	L2000-10	ATM/ATR	DNA Damage	AZ32 is a specific inhibitor of the <b>ATM kinase</b> that possesses good BBB penetration in mouse with an IC50 value of <0.0062 μM for ATM enzyme. It shows adequate selectivity over ATR and also has high cell permeability.	328.37	No CAS	66	200.993	<1		http://www.selleckchem.com/products/az32.html	C20H16N4O	Free Base	N/A	CNC(=O)C1=CC=C(C=C1)C2=CN=C3C=NC(=C[N]23)C4=CC=CC=C4	2.521	3	1	3
S8731	IACS-010759 (IACS-10759)	g2	L2000-10	Others	Others	IACS-010759 (IACS-10759) is a potent and selective oxidative phosphorylation inhibitor (IC50 < 10 nM) that blocks cellular respiration through inhibition of complex I.	562.56	1570496-34-2	27	47.9949	<1		http://www.selleckchem.com/products/iacs-010759-iacs-10759.html	C25H25F3N6O4S	Free Base	N/A	CC1=NC(=N[N]1CC2=CC(=CC=C2)N3CCC(CC3)[S](C)(=O)=O)C4=NC(=NO4)C5=CC=C(OC(F)(F)F)C=C5	4.909	8	0	8
S8736	Verinurad (RDEA3170)	h2	L2000-10	Others	Others	Verinurad (RDEA3170) is a high-affinity inhibitor of the URAT1 transporter with an IC50 of 25 nM for inhibiting transport activity of human URAT1. It inhibits the related URAT1 homologs OAT4 and OAT1 with approximately 200-fold lower affinity compared to URAT1 with IC50 values of 5.9 µM and 4.6 µM, respectively.	348.418	1352792-74-5	70	200.908	<1		http://selleckchem.com/products/verinurad-rdea3170.html	C20H16N2O2S	free base	N/A	CC(C)(SC1=C(C=NC=C1)C2=C3C=CC=CC3=C(C=C2)C#N)C(O)=O	3.804	2	0	4
S8738	Bimiralisib (PQR309)	a3	L2000-10	PI3K	PI3K/Akt/mTOR	Bimiralisib (PQR309) is a novel brain-penetrant dual <b>PI3K/mTOR</b> inhibitor with in vitro and in vivo antilymphoma activity. It displays excellent selectivity versus PI3K-related lipid kinases, protein kinases and unrelated targets.	411.38	1225037-39-7	6	14.5851	<1		http://www.selleckchem.com/products/pqr309-bimiralisib.html	C17H20F3N7O2	Free Base	N/A	NC1=NC=C(C2=NC(=NC(=N2)N3CCOCC3)N4CCOCC4)C(=C1)C(F)(F)F	1.891	6	1	4
S8741	Avitinib (AC0010)	b3	L2000-10	EGFR	Protein Tyrosine Kinase	Avitinib (AC0010) is a pyrrolopyrimidine-based irreversible <b>EGFR</b> inhibitor that is mutation-selective with IC50 value of 0.18 nM against EGFR L858R/T790M double mutations, nearly 43-fold greater potency over wild-type EGFR (IC50 value, 7.68 nM). It has comparable anti-tumor activity and tolerated toxicity.	487.53	1557267-42-1	97	198.962	<1		http://www.selleckchem.com/products/avitinib-ac0010.html	C26H26FN7O2	Free Base	N/A	CN1CCN(CC1)C2=C(F)C=C(NC3=NC4=C(C=C[NH]4)C(=N3)OC5=CC(=CC=C5)NC(=O)C=C)C=C2	4.857	4	3	7
S8745	LXH254	c3	L2000-10	Raf	MAPK	LXH254 is a type II ATP-competitive inhibitor that inhibits both <b>B- and CRAF kinase</b> activities at picomolar concentrations with a high degree of selectivity against a panel of 456 human kinases and in cell-based assays.	502.49	1800398-38-2	100	199.009	<1		http://www.selleckchem.com/products/lxh254.html	C25H25F3N4O4	Free Base	N/A	CC1=CC=C(NC(=O)C2=CC(=NC=C2)C(F)(F)F)C=C1C3=CC(=NC(=C3)OCCO)N4CCOCC4	4.061	5	2	8
S8752	leniolisib(CDZ 173)	d3	L2000-10	PI3K	PI3K/Akt/mTOR	Leniolisib(CDZ 173) is a potent <b>PI3Kδ</b> selective inhibitor with <b>biochemical IC50 values</b> of 0.244, 0.424, 2.23 and 0.011 μM for PI3Kα, PI3Kβ, PI3Kγ and PI3Kδ, respectively.	450.46	1354690-24-6	90	199.796	<1		http://www.selleckchem.com/products/leniolisib-cdz-173.html	C21H25F3N6O2	Free Base	N/A	CCC(=O)N1CCC(C1)NC2=NC=NC3=C2CN(CC3)C4=CC(=C(OC)N=C4)C(F)(F)F	2.65	5	1	6
S8754	Alofanib(RPT835)	e3	L2000-10	FGFR	Angiogenesis	Alofanib(RPT835) is a novel selective allosteric inhibitor of <b>FGFR2</b> and has a dramatic inhibitory effect with IC50 <10 nM on FGF2-induced phoshphorylation of FRS2a in KATO III cells. It has no direct effect on FGF2-dependent FGFR1 and FGFR3 phosphorylation levels in either cell lines and no effects on FGF2-FGFR2 binding.	413.4	1612888-66-0	83	200.774	<1		http://www.selleckchem.com/products/alofanib-rpt835.html	C19H15N3O6S	Free Base	N/A	CC1=CC(=C(N[S](=O)(=O)C2=CC=CC(=C2)C(O)=O)C=C1C3=CC=CN=C3)[N+]([O-])=O	2.695	4	1	6
S8755	AZ304	f3	L2000-10	Raf	MAPK	AZ304 is a synthetic inhibitor designed to interact with the ATP-binding site of <b>wild type and V600E mutant BRAF</b> with IC50 values of 79 nM and 38 nM, respectively. It also inhibits <b>CRAF, p38 and CSF1R</b> at sub 100 nM potencies.	451.52	942507-42-8	90	199.327	<1		http://www.selleck.cn/products/az304.html	C27H25N5O2_x000D_	free base	N/A	COC1=CC2=C(C=C1)C(=NC=N2)NC3=CC(=CC=C3C)NC(=O)C4=CC=CC(=C4)C(C)(C)C#N	5.524	4	2	6
S8757	Ripretinib (DCC-2618)	g3	L2000-10	c-Kit	Protein Tyrosine Kinase	DCC-2618 is an orally bioavailable switch pocket control inhibitor of wild-type and mutated forms of the tumor-associated antigens (TAA) mast/stem cell factor receptor (SCFR) <b>KIT</b> and <b>PDGFR-alpha</b>, with IC50 values of 4 nM, 8 nM, 18 nM, 5 nM and 14 nM for WT KIT, V654A KIT, T670I KIT, D816H KIT and D816V KIT, respectively.	510.36	1442472-39-0	100	195.94	<1		http://www.selleckchem.com/products/ripretinib-dcc-2618.html	C24H21BrFN5O2	Free Base	N/A	CCN1C(=O)C(=CC2=C1C=C(NC)N=C2)C3=C(Br)C=C(F)C(=C3)NC(=O)NC4=CC=CC=C4	4.129	3	3	5
S8759	S55746 (S 055746,BCL201)	h3	L2000-10	Bcl-2	Apoptosis	S55746 (S 055746,BCL201) is a novel, orally active <b>BCL-2</b> specific inhibitor (Ki = 1.3 nM) with poor affinity for BCL-XL and no significant binding to MCL-1, BFL-1 (BCL2A1/A1). The selectivity of S55746 for BCL-2 versus BCL-XL ranges from ~70 to 400 folds.	710.82	1448584-12-0	100	140.683	<1		http://www.selleckchem.com/products/s55746-s055746-bcl201.html	C43H42N4O6	Free Base	N/A	OC1=CC=C(C=C1)N(C(=O)C2=C3CCCC[N]3C(=C2)C4=C(C=C5OCOC5=C4)C(=O)N6CC7=C(CC6CN8CCOCC8)C=CC=C7)C9=CC=CC=C9	6.817	5	1	7
S8760	Iberdomide(CC220)	a4	L2000-10	Immunology & Inflamm	Immunology & Inflammation	Iberdomide (CC-220) is a novel oral immunomodulatory compound that targets <b>cereblon</b>, part of the CRL4CRBN E3 ubiquitin ligase complex, with an IC50 of 60 nM in a competitive TR-FRET assay.	449.5	1323403-33-3	90	200.222	<1		http://www.selleck.cn/products/iberdomide.html	C25H27N3O5_x000D_	free base	N/A	O=C1CCC(N2CC3=C(OCC4=CC=C(CN5CCOCC5)C=C4)C=CC=C3C2=O)C(=O)N1	1.56	5	1	6
S8761	Adavivint (SM04690)	b4	L2000-10	Wnt/beta-catenin	Stem Cells & Wnt	SM04690 is a potent and specific inhibitor of <b>canonical Wnt signaling</b> with an EC50 of 19.5 nM for inhibiting the TCF/LEF reporter. It is ∼150- to 500-fold more potent than the other known Wnt inhibitors across multiple cellular assays.	505.55	1467093-03-3	30	59.3413	<1		http://www.selleckchem.com/products/adavivint.html	C29H24FN7O	Free Base	N/A	CC(C)CC(=O)NC1=CN=CC(=C1)C2=CC3=C([NH]N=C3C4=NC5=C([NH]4)C(=CN=C5)C6=CC=CC(=C6)F)C=C2	4.779	5	3	6
S8765	PF-04965842	c4	L2000-10	JAK	JAK/STAT	PF-04965842 is a potent <b>JAK1</b> inhibitor with IC50s of 29 nM, 803 nM, > 10 000 nM and 1250 nM for JAK1, JAK2, JAK3 and tyrosine kinase (TYK) 2, respectively.	323.41	1622902-68-4	65	200.983	<1		http://www.selleck.cn/products/pf-04965842.html	C14H21N5O2S_x000D_	free base	N/A	CCC[S](=O)(=O)NC1CC(C1)N(C)C2=C3C=C[NH]C3=NC=N2	1.101	4	2	6
S8770	Lanifibranor(IVA-337)	d4	L2000-10	PPAR	Metabolism	Lanifibranor (IVA-337) is a moderately potent and well balanced pan <b>PPAR</b> agonist with <b>EC50 values</b> of 1537 nM, 866 nM and 206 nM for hPPARα, hPPARδ and hPPARγ, respectively.	434.92	927961-18-0	87	200.037	<1		http://www.selleckchem.com/products/lanifibranor-iva-337.html	C19H15ClN2O4S2	Free Base	N/A	OC(=O)CCCC1=CC2=CC(=CC=C2[N]1[S](=O)(=O)C3=CC4=C(C=C3)N=CS4)Cl	4.676	4	0	6
S8771	IDF-11774	e4	L2000-10	HIF	Angiogenesis	IDF-11774 is a <b>hypoxia-inducible factor-1 (HIF-1)</b> inhibitor. It reduces the HRE-luciferase activity of HIF-1α (IC50 = 3.65 μM) and blocks HIF-1α accumulation under hypoxia in HCT116 human colon cancer cells.	368.51	1429054-28-3	15	40.7045	<1		http://www.selleckchem.com/products/idf-11774.html	C23H32N2O2	Free Base	N/A	CN1CCN(CC1)C(=O)COC2=CC=C(C=C2)[C]34C[CH]5[CH2]C([CH2][CH](C5)C3)C4	3.446	2	0	4
S8772	LY 3200882	f4	L2000-10	TGF-beta/Smad	TGF-beta/Smad	LY 3200882 is a potent, highly selective inhibitor of <b>TGF-β receptor type 1 (TGFβRI)</b>. It potently inhibits TGFβ mediated SMAD phosphorylation in vitro in tumor and immune cells and in vivo in subcutaneous tumors in a dose dependent fashion.	435.52	1898283-02-7	87	199.761	<1		http://www.selleckchem.com/products/ly3200882.html	C24H29N5O3	Free Base	N/A	CC(C)(O)C1=NC=CC(=C1)NC2=NC=CC(=C2)OC3=C[N](N=C3C4CCOCC4)C5CC5	3.363	5	1	7
S8777	Evobrutinib	g4	L2000-10	BTK	Protein Tyrosine Kinase	Evobrutinib is a highly selective <b>BTK</b> inhibitor with an IC50 of 37.9 nM. It has potential anti-neoplastic activity.	429.51	1415823-73-2	86	200.228	<1		http://www.selleckchem.com/products/evobrutinib.html	C25H27N5O2	Free Base	M-2951, MSC-2364447C	NC1=C(C(=NC=N1)NCC2CCN(CC2)C(=O)C=C)C3=CC=C(OC4=CC=CC=C4)C=C3	3.916	4	2	7
S8780	AZD3229	h4	L2000-10	c-Kit	Protein Tyrosine Kinase	AZD3229 is a potent, pan-<b>KIT mutant</b> inhibitor with potent single digit nM growth inhibition against a diverse panel of mutant KIT driven Ba/F3 cell lines (GI50=1-50 nM), with good margin to KDR-driven effects. It also inhibits <b>PDGFR mutants</b> (Tel-PDGFRα, Tel-PDGFRβ, V561D/D842V).	479.51	2248003-60-1	96	200.204	<1		http://www.selleck.cn/products/azd3229.html	C24H26FN7O3_x000D_	free base	N/A	COCCOC1=CC(=C2C(=NC=NC2=C1)NC3=CC=C(NC(=O)C[N]4C=C(N=N4)C(C)C)C=C3)F	3.766	7	2	10
S8801	CC-90003	a5	L2000-10	ERK	MAPK	CC-90003 is an irreversible inhibitor of <b>ERK1/2</b> with IC50s in the 10-20 nM range and shows good kinase selectivity in a 258-kinase biochemical assay.	458.44	1621999-82-3	92	200.681	<1		http://www.selleckchem.com/products/cc-90003.html	C22H21F3N6O2	Free Base	N/A	COC1=CC(=C(C)C=N1)NC2=NC(=C(C=N2)C(F)(F)F)NC3=C(NC(=O)C=C)C=C(C)C=C3	5.316	5	3	8
S8807	PFK158	b5	L2000-10	Autophagy	Autophagy	PFK158 is a potent and selective inhibitor of <b>PFKFB3</b>. It has improved PK properties and causes ~80% growth inhibition in several mouse models of human-derived tumors.	328.29	1462249-75-7	14	42.6452	<1		http://www.selleck.cn/products/pfk158.html	C18H11F3N2O_x000D_	free base	N/A	FC(F)(F)C1=CC=C2C=CC(=NC2=C1)\C=C\C(=O)C3=CC=NC=C3	4.108	3	0	4
S9010	Bevirimat	c5	L2000-10	Anti-HIV	Others	Bevirimat(YK FH312; FH11327; MPC-4326) is an anti-HIV drug derived from a betulinic acid-like compound	584.826	174022-42-5	10	17.0991				C36H56O6	free base		CC(=C)C1CCC2(CCC3(C)C(CCC4C5(C)CCC(OC(=O)CC(C)(C)C(O)=O)C(C)(C)C5CCC34C)C12)C(O)=O	7.65	4	0	7
S9089	Magnoflorine	d5	L2000-10	Others	Others	Magnoflorine, an alkaloid isolated from coptidis rhizoma, exerts an inhibitory effect against Cu2+-induced lipid peroxidation of high density lipoprotein (HDL), has beneficial properties on protecting human HDL against lipid peroxidation. Magnoflorine possesses high activity as α-glucosidase inhibitor in vitro and in vivo, has antidiabetic potential activity. Sinomeni Caulis et Rhizoma has sedati…	342.409	2141-09-5	10	29.2049				C20H24NO4+	free base		COC1=C(O)C2=C(CC3C4=C2C(=C(OC)C=C4CC[N+]3(C)C)O)C=C1	1.728	2	2	2
S9101	Ingenol	e5	L2000-10	Cancer	PKC	Ingenol is a PKC activator, with a Ki of 30 μM, with antitumor activity.	348.433	30220-46-3	69	198.029				C20H28O5	free base		CC1CC2C(C3C=C(CO)C(O)C4(O)C(O)C(=CC14C3=O)C)C2(C)C	0.543	1	3	1
S9133	Chicoric acid	f5	L2000-10	Infection	Others	L-Chicoric acid is an inhibitor of human immunodeficiency virus type 1 (HIV-1) integrase in vitro and of HIV-1 replication in tissue culture.	474.371	70831-56-0	94	198.157				C22H18O12	free base		OC(=O)C(OC(=O)\C=C\C1=CC(=C(O)C=C1)O)C(OC(=O)\C=C\C2=CC(=C(O)C=C2)O)C(O)=O	2.39	6	4	11
S9151	Praeruptorin E	g5	L2000-10	Others	Others	Praeruptorin C and E can relax swine coronary artery and decrease contractility in guinea-pig left atria, these effects are similar in many respects to those displayed by drugs that have calcium entry blocking activity. Praeruptorin D and E can protect mice from hydrochloric acid (HCl)-induced lung injury by inhibiting polymorphonuclear leukocytes (PMNs) influx, IL-6 release and protein exudation…	428.475	78478-28-1	34.6	80.7515				C24H28O7	free base		C\C=C(C)/C(=O)OC1C(OC(=O)CC(C)C)C2=C3OC(=O)C=CC3=CC=C2OC1(C)C	4.877	7	0	7
S9172	Phellodendrine	h5	L2000-10	Others	Others	Phellodendrine can suppress local semisyngeneic GvH reactions and systemic allogeneic GvH reactions in X-ray irradiated recipient mice, it also can suppress the induction phase of sheep red blood cell (SRBC)-induced delayed type hypersensitivity in mice and tuberculin-induced delayed type hypersensitivity in guinea pigs, suggests that phellodendrine is expected to be a valuable new type of immuno…	342.409	6873-13-8	42.6	124.413				C20H24NO4+	free base		COC1=C(O)C=C2C3CC4=C(C[N+]3(C)CCC2=C1)C=C(OC)C(=C4)O	1.793	2	2	2
S9188	Magnoflorine chloride	a6	L2000-10	Others	anti-inflammatory	Magnoflorine has anti-inflammatory activity, it can inhibit inflammations.	377.862	6681-18-1	76	201.132				C20H24ClNO4	free base		[Cl-].COC1=C(O)C2=C(CC3C4=C2C(=C(OC)C=C4CC[N+]3(C)C)O)C=C1	-0.946	2	2	2
S9245	Phellodendrine chloride	b6	L2000-10	Others	Others	Phellodendrine chloride has anti-nephritic activity, may be due to its ability to inhibit the proliferation or the migration of macrophages and cytotoxic T lymphocytes in the glomeruli.	377.862	104112-82-5	36	95.2729				C20H24ClNO4	free base		[Cl-].COC1=CC2=C(CC3C4=C(CC[N+]3(C)C2)C=C(OC)C(=C4)O)C=C1O	-0.881	2	2	2
S9295	Dauricine	c6	L2000-10	Others	Others	Dauricine has pulmonary toxicity, can produce pulmonary injury in CD-1 mice by the metabolism of Dauricine mediated by CYP3A. Dauricinec can pass the blood‑brain barrier, and that P‑glycoprotein has an important role in the transportation of Dauricine across the blood‑brain barrier. Dauricine may has anti-tumor effect, can inhibit tumor cells in urinary system and colon cancer cell proliferation,…	624.766	524-17-4	100	160.06				C38H44N2O6	free base		COC1=CC2=C(C=C1OC)C(CC3=CC=C(OC4=C(O)C=CC(=C4)CC5N(C)CCC6=C5C=C(OC)C(=C6)OC)C=C3)N(C)CC2	7.245	5	1	10
S9339	S-(-)-Cotinine	d6	L2000-10	Nicotinic Receptor	Cancer	Cotinine is an alkaloid found in tobacco and is also the predominant metabolite of nicotine.	176.215	486-56-6		The physical form of the compound is liquid, which can be dissolved in any proportion.				C10H12N2O	free base		CN1C(CCC1=O)C2=CN=CC=C2	0.296	2	0	1
S9348	D-(+)-Trehalose Anhydrous	e6	L2000-10	Others	Others	Experimentally measured binding affinity data (Ki) for protein-ligand complexes derived from PDB	342.296	99-20-7	68	198.658				C12H22O11	free base		OCC1OC(OC2OC(CO)C(O)C(O)C2O)C(O)C(O)C1O	-4.261	3	8	4
S9449	Urocanic acid	f6	L2000-10	Others	Others	Urocanic acid is an intermediate in the catabolism of L-histidine.	138.12	104-98-3	28	202.722	-1		http://www.selleckchem.com/products/urocanic-acid.html	C6H6N2O2	Free Base	N/A	OC(=O)/C=C/C1=C[NH]C=N1	0.243	2	1	2
S1292	Chelerythrine Chloride	g6	L2000-10	PKC	TGF-beta/Smad	Chelerythrine is a potent, selective antagonist of <b>PKC</b> with <b>IC50</b> of 0.66 mM.	384.83	3895-92-9	4	10.3942	<1		http://www.selleck.cn/products/Chelerythrine-chloride.html	C21H18NO4.HCl_x000D_	Chloride	N/A	Cl.COC1=CC=C2C(=C1OC)C=[N+](C)C3=C2C=CC4=C3C=C5OCOC5=C4	4.568	4	0	2
S1553	ABT-492(Delafloxacin, RX-3341, WQ-3034)	h6	L2000-10	Others	Others	ABT-492 is a new fluoroquinolone against 155 aerobic and 171 anaerobic pathogens.	440.76	189279-58-1, 339591-82-1 (sodium salt)	88	199.655	<1		http://www.selleck.cn/products/ABT-492.html	C18H12ClF3N4O4	free base	WQ-3034, ABT492	NC1=C(F)C=C(F)C(=N1)N2C=C(C(O)=O)C(=O)C3=CC(=C(N4CC(O)C4)C(=C23)Cl)F	2.682	3	2	3
S1591	Bestatin	a7	L2000-10	Immunology & Inflamm	Immunology & Inflammation	Bestatin is a potent <b>aminopeptidase-B</b> and <b>leukotriene (LT) A4 hydrolase</b> inhibitor, used in the treatment of acute myelocytic leukemia.	308.37	58970-76-6	4	12.9714	<1		http://www.selleck.cn/products/Ubenimex(Bestatin).html	C16H24N2O4_x000D_	Free Base	Ubenimex	CC(C)CC(NC(=O)C(O)C(N)CC1=CC=CC=C1)C(O)=O	-1.34	2	3	8
S2162	AZD1480	b7	L2000-10	JAK	JAK/STAT	AZD1480 is a novel ATP-competitive JAK2 inhibitor with IC50 of 0.26 nM in a cell-free assay, selectivity against JAK3 and Tyk2, and to a smaller extent against JAK1. Phase 1.	348.77	935666-88-9	70	200.705	<1		http://www.selleck.cn/products/AZD1480.html	C14H14ClFN8_x000D_	free base	N/A	CC(NC1=NC=C(Cl)C(=N1)NC2=N[NH]C(=C2)C)C3=NC=C(F)C=N3	2.645	5	3	5
S2183	BGJ398 (NVP-BGJ398|Infigratinib)	c7	L2000-10	FGFR	Angiogenesis	BGJ398 (NVP-BGJ398) is a potent and selective <b>FGFR</b> inhibitor for FGFR1/2/3 with <b>IC50</b> of 0.9 nM/1.4 nM/1 nM in cell-free assays, >40-fold selective for FGFR versus FGFR4 and VEGFR2, and little activity to Abl, Fyn, Kit, Lck, Lyn and Yes. Phase 2.	560.48	872511-34-7	27	48.173	<1		http://www.selleck.cn/products/bgj398-nvp-bgj398.html	C26H31Cl2N7O3_x000D_	Free Base	N/A	CCN1CCN(CC1)C2=CC=C(NC3=NC=NC(=C3)N(C)C(=O)NC4=C(Cl)C(=CC(=C4Cl)OC)OC)C=C2	5.342	5	2	8
S2298	Fisetin	d7	L2000-10	Sirtuin	Epigenetics	Fisetin (Fustel) is a potent sirtuin activating compound (STAC) and an agent that modulates sirtuins.	286.24	528-48-3	57	199.134	<1		http://selleckchem.com/products/Fisetin(Fustel).html	C15H10O6	free base	N/A	OC1=CC2=C(C=C1)C(=O)C(=C(O2)C3=CC(=C(O)C=C3)O)O	1.872	2	4	1
S2312	Icariin	e7	L2000-10	PDE	Metabolism	Icariin is a cGMP-specific PDE5 inhibitor with IC50 of 0.432 μM, 167-fold more selective for PDE5 than PDE4.	676.66	489-32-7	50	73.8924	<1		http://selleckchem.com/products/Icariin.html	C33H40O15	free base	N/A	COC1=CC=C(C=C1)C2=C(OC3OC(C)C(O)C(O)C3O)C(=O)C4=C(O2)C(=C(OC5OC(CO)C(O)C(O)C5O)C=C4O)CC=C(C)C	0.983	7	8	9
S2394	Naringenin	f7	L2000-10	P450 (e.g. CYP17)	Metabolism	Naringenin is a natural predominant flavanone derived from plant food, which is considered to have a bioactive effect on human health as antioxidant, free radical scavenger, anti-inflammatory, carbohydrate metabolism promoter, and immune system modulator.	272.25	480-41-1	54	198.347	<1		http://selleckchem.com/products/naringenin.html	C15H12O5	free base	NSC 34875, S-Dihydrogenistein, NSC 11855, Salipurol	OC1=CC=C(C=C1)C2CC(=O)C3=C(O)C=C(O)C=C3O2	2.373	2	3	1
S2399	Dihydromyricetin	g7	L2000-10	GABA Receptor,ROS	Neuronal Signaling	Dihydromyricetin (Ampelopsin, Ampeloptin) is a natural antioxidant flavonoid from Ampelopsis grossedentata.	320.25	27200-12-0	64	199.844	<1		http://selleckchem.com/products/Dihydromyricetin-Ampeloptin.html	C15H12O8	free base	Ampeloptin	OC1C(OC2=CC(=CC(=C2C1=O)O)O)C3=CC(=C(O)C(=C3)O)O	1.237	2	6	1
S2407	Curcumol	h7	L2000-10	JAK	JAK/STAT	Curcumol is a pure monomer isolated from Rhizoma Curcumaeis with antitumor activities.	236.35	4871-97-0	47	198.858	<1		http://selleckchem.com/products/Curcumol.html	C15H24O2	free base	N/A	CC(C)C1CC23OC1(O)CC(=C)C2CCC3C	2.786	1	0	1
S2425	Apocynin	a8	L2000-10	NADPH-oxidase	Others	Apocynin is a selective NADPH-oxidase inhibitor with IC50 of 10 μM.	166.17	498-02-2	33	198.592	<1		http://selleckchem.com/products/apocynin-acetovanillone.html	C9H10O3	free base	Acetovanillone	COC1=C(O)C=CC(=C1)C(C)=O	1.311	2	1	2
S2799	Daporinad (FK866, APO866)	b8	L2000-10	Transferase	Metabolism	Daporinad (FK866, APO866) effectively inhibits nicotinamide phosphoribosyltransferase (<b>NMPRTase</b>) with <b>IC50</b> of 0.09 nM in a cell-free assay. Phase 1/2.	391.51	658084-64-1	78	199.229	<1		http://www.selleck.cn/products/apo866-fk866.html	C24H29N3O2_x000D_	Free Base	N/A	O=C(NCCCCC1CCN(CC1)C(=O)C2=CC=CC=C2)/C=C/C3=CC=CN=C3	3.269	3	1	8
S3693	2,6-Dihydroxypurine	c8	L2000-10	Others	Others	2,6-Dihydroxypurine (Xanthine) is a purine base found in most body tissues and fluids, certain plants, and some urinary calculi. It is a product on the pathway of purine degradation.	152.11	69-89-6	2	13.1484	<1		http://selleckchem.com/products/2-6-dihydroxypurine.html	C5H4N4O2	free base	xanthine, Isoxanthine	O=C1NC(=O)C2=C(N1)N=C[NH]2	-0.718	3	3	0
S3796	Rebaudioside A	d8	L2000-10	Others	Others	Rebaudioside A (Stevia Extract), an natural sweetening ingredient extracted from the stevia leaf, is used in powder or liquid form to heighten sweetening intensity and improve taste.	967.01	58543-16-1	40	41.3646			http://selleckchem.com/products/rebaudioside-a.html	C44H70O23	free base	Reb A, Glycoside A3, Stevioside A3	CC12CCCC(C)(C1CCC34CC(=C)C(CCC23)(C4)OC5OC(CO)C(O)C(OC6OC(CO)C(O)C(O)C6O)C5OC7OC(CO)C(O)C(O)C7O)C(=O)OC8OC(CO)C(O)C(O)C8O	-3.476	9	14	13
S3813	Bakuchiol	e8	L2000-10	Immunology & Inflammation related	Immunology & Inflammation	Bakuchiol is a meroterpene phenol abundant in seeds and leaves of the plant Psoralea corylifolia. It has anti-inflammatory and antimicrobial activities.	256.38	10309-37-2	The physical form of the compound is liquid, which can be dissolved in any proportion.				http://selleckchem.com/products/bakuchiol.html	C18H24O	free base	(S)-(+)-Bakuchiol	CC(C)=CCCC(C)(C=C)\C=C\C1=CC=C(O)C=C1	5.348	0	1	6
S3826	Hydroxytyrosol	f8	L2000-10	Others	Others	Hydroxytyrosol is one of the main phenolic components of olive oil with excellent antioxidant, antimicrobial and anticarcinogenic activities.	154.16	10597-60-1	30	194.603			http://selleckchem.com/products/hydroxytyrosol.html	C8H10O3	free base	3-Hydroxytyrosol; 3,4-dihydroxyphenylethanol; Dihydroxyphenylethanol; 2-(3,4-Di-hydroxyphenyl)-ethanol	OCCC1=CC=C(O)C(=C1)O	1.062	0	3	2
S3860	Allicin	g8	L2000-10	Anti-infection	Metabolism	Allicin, the main biologically active component of the freshly crushed garlic extracts, possesses various biological activities including antibacterial, antifungal and antiparasitic effects.	162.27	539-86-6	The physical form of the compound is liquid, which can be dissolved in any proportion.				http://selleckchem.com/products/allicin.html	C6H10OS2	free base	diallyl thiosulfinate	C=CCS[S](=O)CC=C	2.005	1	0	5
S3922	(-)-epigallocatechin	h8	L2000-10	Others	Others	(-)-Epigallocatechin, widespread in plants, has been shown to exhibit anti-tumor, anti-cancer and anti-inflammatory functions.	306.27	970-74-1	61	199.171			http://selleckchem.com/products/neg-rotation-epigallocatechin.html	C15H14O7	free base	N/A	OC1CC2=C(OC1C3=CC(=C(O)C(=C3)O)O)C=C(O)C=C2O	1.779	1	6	1
S4760	(2-Hydroxypropyl)-β-cyclodextrin (HP-β-CD)	a9	L2000-10	Beta Amyloid	Neuronal Signaling	HP-β-cyclodextrin (HP-β-CD), a well-known sugar used in drug delivery, genetic vector, environmental protection and treatment of Niemann-Pick disease type C1 (NPC1), is an inhibitor of amyloid-β aggregation.	1541.54	128446-35-5	100	64.8702	100	64.8702	http://selleckchem.com/products/2-hydroxypropyl-beta-cyclodextrin-hp-beta-cd.html	C63H112O42	free base	HP-β-cyclodextrin	CC(O)COCC1OC2OC3C(O)C(O)C(OC3COCC(C)O)OC4C(O)C(O)C(OC4COCC(C)O)OC5C(O)C(O)C(OC5COCC(C)O)OC6C(O)C(O)C(OC6COCC(C)O)OC7C(O)C(O)C(OC7COCC(C)O)OC8C(O)C(O)C(OC8COCC(C)O)OC1C(O)C2O	-10.503	21	21	28
S4761	Thymoquinone	b9	L2000-10	Others	Others	Thymoquinone (TQ) is the bioactive phytochemical constituent of the seeds oil of Nigella sativa with anti-inflammatory and anti-oxidant effects.	164.2	490-91-5	32	194.884			http://selleckchem.com/products/thymoquinone.html	C10H12O2	free base	N/A	CC(C)C1=CC(=O)C(=CC1=O)C	2.288	2	0	1
S4927	Cyclen	c9	L2000-10	Others	Others	Cyclen is a macrocycle capable of selectively binding cations that used as a ligand in chemistry for instance with chemicals used in MRI contrast agents.	172.27	294-90-6	34	197.365	34	197.365	http://selleckchem.com/products/cyclen.html	C8H20N4	free base	1,4,7,10-tetraazacyclododecane	C1CNCCNCCNCCN1	-1.589	0	4	0
S5140	Cinene	d9	L2000-10	Others	Others	Cinene (Limonene, Dipentene) is a clear, colorless liquid hydrocarbon classified as a cyclic monoterpene, and is the major component in oil of citrus fruit peels. It is usually used to make fragrances and flavors.	136.23	138-86-3	The physical form of the compound is liquid, which can be dissolved in any proportion.				http://selleckchem.com/products/cinene.html	C10H16	free base	Limonene, Dipentene, Cyclohexene, Eulimen|	CC(=C)C1CCC(=CC1)C	0	0	0	0
S5269	J147	e9	L2000-10	Others	Others	J147, a curcumin derivative, is a potent neurogenic and neuroprotective compound developed for the treatment of neurodegenerative conditions associated with aging.	350.33	1146963-51-0	70	199.812			http://selleckchem.com/products/j147.html	C18H17F3N2O2	free base	N/A	COC1=CC(=CC=C1)/C=N/N(C(=O)C(F)(F)F)C2=CC=C(C)C=C2C	4.845	3	0	5
S5796	Vanoxerine dihydrochloride	f9	L2000-10	Dopamine Receptor	Neuronal Signaling	Vanoxerine is a potent and selective inhibitor of the presynaptic <b>dopamine uptake</b> complex.	523.49	67469-78-7	17	32.4744	5	9.55128	http://www.selleck.cn/products/vanoxerine-dihydrochloride.html	C28H34Cl2F2N2O	dihydrochloride	GBR-12909	Cl.Cl.FC1=CC=C(C=C1)C(OCCN2CCN(CCCC3=CC=CC=C3)CC2)C4=CC=C(F)C=C4	6.878	1	0	10
S5818	acalisib (GS-9820)	g9	L2000-10	PI3K	PI3K/Akt/mTOR	acalisib (GS-9820) is a highly selective and potent <b>p110δ</b> inhibitor (IC50 = 14 nM) with 114- to 400-fold selectivity over the other class I PI3K enzymes and no activity against Class II and III PI3K family members or other PI3K-related proteins including mTOR and DNA-PK.	401.4	870281-34-8	80	199.302	1	2.49128	http://www.selleckchem.com/products/acalisib-gs-9820.html	C21H16FN7O	Free Base	CAL-120	CC(NC1=NC=NC2=C1[NH]C=N2)C3=NC4=C(C=C(F)C=C4)C(=O)N3C5=CC=CC=C5	3.097	5	2	4
S5839	L-Kynurenine	h9	L2000-10	Others	Others	L-Kynurenine is a metabolite of the amino acid L-tryptophan used in the production of niacin. It is also a central compound of the tryptophan metabolism pathway.	208.21	2922-83-0	42	201.719	3	14.4085	http://www.selleckchem.com/products/l-kynurenine.html	C10H12N2O3	Free Base	(S)-Kynurenine	NC(CC(=O)C1=C(N)C=CC=C1)C(O)=O	-2.752	2	2	4
S5932	BIA 10-2474	a10	L2000-10	FAAH	Metabolism	BIA 10-2474 is a novel <b>fatty acid amide hydrolase (FAAH)</b> inhibitor, with a potent inhibitory effect upon FAAH and prolonged action in vivo.	300.36	1233855-46-3	4	13.3174	<1		http://www.selleck.cn/products/bia-10-2474.html	C16H20N4O2_x000D_	Free Base	N/A	CN(C1CCCCC1)C(=O)[N]2C=NC(=C2)C3=CC=C[N+](=C3)[O-]	1.719	2	0	2
S6185	Arachidonic acid	b10	L2000-10	Immunology & Inflamm	Immunology & Inflammation	Arachidonic acid is an unsaturated, essential fatty acid found in animal and human fat as well as in the liver, brain, and glandular organs. It is a precursor in the biosynthesis of prostaglandins, thromboxanes, and leukotrienes.	304.47	506-32-1	The physical form of the compound is liquid, which can be dissolved in any proportion.				http://www.selleck.cn/products/arachidonic-acid.html	C20H32O2_x000D_	free base	Arachidonate	CCCCC\C=C/C/C=C\C\C=C/C/C=C\CCCC(O)=O	6.439	1	0	14
S6412	Altiratinib	c10	L2000-10	Trk receptor	Protein Tyrosine Kinase	Altiratinib is a potent single-digit nanomolar inhibitor of TRK, MET, TIE2, and VEGFR2 kinases with IC50 vaules of 0.9 nM, 4.6 nM, and 0.8 nM for TRKA, B, and C, respectively. It inhibits MET and MET mutant with IC50 values in the range of 0.3-6 nM.	510.46	1345847-93-9	100	195.902	<1		http://www.selleck.cn/products/altiratinib.html	C26H21F3N4O4_x000D_	free base	DCC-2701	FC1=CC=C(NC(=O)C2(CC2)C(=O)NC3=C(F)C=C(OC4=CC(=NC=C4)NC(=O)C5CC5)C(=C3)F)C=C1	3.867	5	3	8
S6414	Apilimod	d10	L2000-10	PI3K	PI3K/Akt/mTOR	Apilimod is a cell permeable small molecule that specifically inhibits <b>PIKfyve</b> with an IC50 of 14 nM in an in vitro kinase assay. It is also an inhibitor of <b>IL-12/23</b> and shows no activity toward other lipid kinases and protein kinases, including PIP4K, PIP5K, mTOR, PI3K and PI4K isoforms.	418.49	541550-19-0	84	200.722	-1		http://www.selleck.cn/products/apilimod.html	C23H26N6O2_x000D_	Free Base	STA-5326	CC1=CC=CC(=C1)\C=N\NC2=CC(=NC(=N2)OCCC3=CC=CC=N3)N4CCOCC4	4.485	6	1	8
S6415	Azeliragon	e10	L2000-10	Others	Others	Azeliragon (TTP488) is an orally bioavailable small molecule that inhibits the <b>receptor for advanced glycation endproducts (RAGE)</b>, which is an immunoglobulin-like cell surface receptor overexpressed in brain tissues of patients with AD.	532.12	603148-36-3	100	187.928	<1		http://www.selleck.cn/products/azeliragon.html	C32H38ClN3O2_x000D_	Free Base	TTP488	CCCCC1=NC(=C[N]1C2=CC=C(OC3=CC=C(Cl)C=C3)C=C2)C4=CC=C(OCCCN(CC)CC)C=C4	8.393	3	0	14
S6418	PF 429242	f10	L2000-10	S1P Receptor	GPCR & G Protein	PF 429242 is known as a <b>S1P</b> inhibitor with an IC50 of 170 nM, showing no significant inhibition of trypsin, elastase, proteinase K, plasmin, kallikren, factor XIa, thrombin, or furin at concentrations up to 100 μM and only modest inhibition of urokinase (IC50 = 50 μM) and factor Xa (IC50 = 100 μM).	409.56	947303-87-9	82	200.215	-1		http://www.selleck.cn/products/pf429242.html	C25H35N3O2_x000D_	Free Base	N/A	CCN(CC)CC1=CC=C(C=C1)C(=O)N(CCC2=CC=CC=C2OC)C3CCNC3	3.415	2	1	10
S5591	Ectoine	a11	L2000-10	Others	Others	Ectoine induced salt tolerance	142.156	96702-03-3	<1		28	196.967	http://selleckchem.com/products/.html	C6H10N2O2	free base		CC1=NC(CCN1)C(O)=O	-0.868	2	1	1
S5801	Ala-Gln	b11	L2000-10	Others	Others	Ala-Gln, a dipeptide composed of alanine and Gln, is an alternative supplement to L-glutamine in the production of biopharmaceuticals with better solubility and stability than glutamine (Gln).	217.22	39537-23-0	<1		43	197.956	http://www.selleckchem.com/products/ala-gln.html	C8H15N3O4	Free Base	l-alanyl-l-glutamine	CC(N)C(=O)NC(CCC(N)=O)C(O)=O	-4.543	3	3	6
S6176	scyllo-Inositol	c11	L2000-10	Others	Others	scyllo-Inositol is a naturally occurring plant sugar alcohol found most abundantly in the coconut palm.	180.16	488-59-5			9.02778	50.1098	http://www.selleck.cn/products/scyllo-inositol.html	C6H12O6_x000D_	free base	Scyllitol, Cocositol, Quercinitol, AZD 103, scyllo-Cyclohexanehexol	OC1C(O)C(O)C(O)C(O)C1O	-3.065	0	6	0
S7204	Fosbretabulin (Combretastatin A4 Phosphate (CA4P)) Disodium	d11	L2000-10	Microtubule Associated	Cytoskeletal Signaling	Fosbretabulin (Combretastatin A4 Phosphate (CA4P)) Disodium is the water-soluble prodrug of Combretastatin A4 (CA4), which is a microtubule-targeting agent that binds β-tubulin with Kd of 0.4 μM in a cell-free assay. Fosbretabulin Disodium inhibits the polymerization of tubulin with IC50 of 2.4 μM, and also disrupts tumor vasculature. Phase 3.	440.29	168555-66-6	<1		28	63.5944	http://selleckchem.com/products/fosbretabulin-disodium-combretastatin-a-4-phosphate-disodium-ca4p-disodium.html	C18H19Na2O8P	Disodium salt	N/A	[Na+].[Na+].COC1=C(O[P]([O-])([O-])=O)C=C(\C=C/C2=CC(=C(OC)C(=C2)OC)OC)C=C1	1.077	5	0	8
S7537	LB-100	e11	L2000-10	phosphatase	Others	LB-100 is a water soluble protein phosphatase 2A (PP2A) inhibitor with IC50s of 0.85 μM and 3.87 μM in BxPc-3 and Panc-1 cells.	268.31	1026680-07-8	<1		53	197.533	http://selleckchem.com/products/lb-100.html	C13H20N2O4	free base	N/A	CN1CCN(CC1)C(=O)C2C3CCC(O3)C2C(O)=O	-3.624	3	0	2
S7547	XL413 (BMS-863233)	f11	L2000-10	CDK	Cell Cycle	XL413 (BMS-863233) is a potent and selective cell division cycle 7 homolog (CDC7) kinase inhibitor with IC50 of 3.4 nM, showing 63-, 12- and 35-fold selectivity over CK2, Pim-1 and pMCM2, respectively. Phase 1/2.	326.18	1169562-71-3	<1		46	141.026	http://selleckchem.com/products/xl413-bms-863233.html	C14H13Cl2N3O2	free base	N/A	Cl.ClC1=CC2=C(OC3=C2N=C(NC3=O)C4CCCN4)C=C1	2.537	3	2	1
S8199	LTX-315	g11	L2000-10	Others	Others	LTX-315 is the oncolytic peptide that kills cancer cells through Bax/Bak-regulated mitochondrial membrane permeabilization.	1439.79	1345407-05-7			100	69.4546	http://selleckchem.com/products/ltx-315.html	C78H106N18O9	free base	Oncopore	NCCCCC(N)C(=O)NC(CCCCN)C(=O)NC(CC1=C[NH]C2=C1C=CC=C2)C(=O)NC(CC3=C[NH]C4=C3C=CC=C4)C(=O)NC(CCCCN)C(=O)NC(CCCCN)C(=O)NC(CC5=C[NH]C6=C5C=CC=C6)C(=O)NC(C(C7=CC=CC=C7)C8=CC=CC=C8)C(=O)NC(CCCCN)C(N)=O	3.102	9	18	46
S8442	TAK-659	h11	L2000-10	Syk,FLT3	Angiogenesis	TAK-659 is a potent and selective inhibitor of spleen tyrosine kinase (SYK) with an IC50 value of 3.2 nM. It is selective against most other kinases, but potent toward both SYK and FLT3.	380.85	1952251-28-3	<1		4	10.5028	http://selleckchem.com/products/tak-659.html	C17H22ClFN6O	hydrochloride	N/A	Cl.C[N]1C=C(C=N1)C2=C3C(=O)NCC3=C(F)C(=N2)NC4CCCCC4N	1.774	3	3	3
S6419	BT-11	a2	L2000-11	Others	Others	BT-11 is an orally active <b>lanthionine synthetase C-like 2 (LANCL2)</b> binding compound for treating inflammatory bowel disease (IBD) (Kd value of 7.7 µM).	528.56	1912399-75-7	13	24.5951	<1		http://www.selleck.cn/products/bt-11.html	C30H24N8O2_x000D_	Free Base	N/A	O=C(N1CCN(CC1)C(=O)C2=NC(=CC=C2)C3=NC4=C([NH]3)C=CC=C4)C5=CC=CC(=N5)C6=NC7=CC=CC=C7[NH]6	4.419	6	2	4
S6420	AGI 1067	b2	L2000-11	Others	Others	AGI-1067 is a novel, phenolic, intra- and extracellular antioxidant that inhibits the expression of a number of proinflammatory genes involved in atherosclerosis.	616.91	216167-82-7	100	162.098	<1		http://www.selleck.cn/products/agi-1067.html	C35H52O5S2_x000D_	Free Base	N/A	CC(C)(C)C1=C(O)C(=CC(=C1)SC(C)(C)SC2=CC(=C(OC(=O)CCC(O)=O)C(=C2)C(C)(C)C)C(C)(C)C)C(C)(C)C	9.634	3	1	13
S6421	Diroximel Fumarete	c2	L2000-11	Others	Others	Diroximel Fumarete, also known as ALKS-8700, is a prodrug of monomethyl fumarate in a controlled-release formulation that rapidly and efficiently converts to MMF in the body.	255.22	1577222-14-0	51	199.828	-1		http://www.selleck.cn/products/diroximel-fumarete.html	C11H13NO6_x000D_	Fumarete	ALKS-8700	COC(=O)\C=C\C(=O)OCCN1C(=O)CCC1=O	-0.278	6	0	7
S6422	Lazabemide	d2	L2000-11	MAO	Metabolism	Lazabemide is a reversible and selective inhibitor of <b>monoamine oxidase B (MAO-B)</b> with Ki value of 7.9 nM.	236.1	103878-84-8	40	169.42	40	169.42	http://www.selleck.cn/products/lazabemide.html	C8H11Cl2N3O_x000D_	Free Base	Ro 19-6327	Cl.NCCNC(=O)C1=CC=C(Cl)C=N1	0.533	2	2	3
S6424	TAS-301	e2	L2000-11	Others	Others	TAS-301 is an inhibitor of smooth muscle cell migration and proliferation and inhibits intimal thickening after balloon injury to rat carotid arteries.	357.4	193620-69-8	71	198.657	-1		http://www.selleck.cn/products/tas-301.html	C23H19NO3_x000D_	Free Base	N/A	COC1=CC=C(C=C1)C(C2=CC=C(OC)C=C2)=C3C(=O)NC4=C3C=CC=C4	4.176	3	1	4
S6471	Lucanthone	f2	L2000-11	Autophagy	Autophagy	Lucanthone is a novel <b>autophagic</b> inhibitor and also an orally available thioxanthone-based DNA intercalator and inhibitor of the DNA repair enzyme apurinic-apyrimidinic endonuclease 1.	340.48	479-50-5	33	96.922	<1		http://www.selleck.cn/products/lucanthone.html	C20H24N2OS_x000D_	Free Base	N/A	CCN(CC)CCNC1=CC=C(C)C2=C1C(=O)C3=C(S2)C=CC=C3	4.653	1	1	6
S6502	SD 0006	g2	L2000-11	p38 MAPK	MAPK	SD0006 is an inhibitor of p38 kinase-alpha (p38alpha) with IC50 values of 0.016 μM and 0.677 μM for p38α and p38β. It is selective for p38α kinase over 50 other kinases screened (including p38γ and p38δ with modest selectivity over p38β).	397.86	271576-80-8	80	201.076	<1		http://www.selleck.cn/products/sd-0006.html	C20H20ClN5O2_x000D_	free base	N/A	OCC(=O)N1CCC(CC1)C2=N[NH]C(=C2C3=NC=NC=C3)C4=CC=C(Cl)C=C4	2.413	4	2	4
S6505	X-376	h2	L2000-11	ALK	Angiogenesis	X-376 is an ALK inhibitor and potentially useful in non-small cell lung cancer.	547.41	1365267-27-1	100	182.678	<1		http://www.selleck.cn/products/x-376.html	C25H25Cl2FN6O3_x000D_	free base	N/A	CC(OC1=CC(=NN=C1N)C(=O)NC2=CC=C(C=C2)C(=O)N3CCN(C)CC3)C4=C(Cl)C=CC(=C4Cl)F	4.067	5	2	6
S6508	Mitapivat	a3	L2000-11	PKM	Metabolism	Mitapivat is an activator of a pyruvate kinase PKM2 , an enzyme involved in glycolysis.	450.55	1260075-17-9	90	199.756	<1		http://www.selleck.cn/products/mitapivat.html	C24H26N4O3S_x000D_	free base	AG-348	O=C(N1CCN(CC1)CC2CC2)C3=CC=C(N[S](=O)(=O)C4=C5N=CC=CC5=CC=C4)C=C3	2.695	4	1	6
S6519	R112	b3	L2000-11	Syk	Angiogenesis	R112 is an ATP-competitive spleen tyrosine kinase (Syk) inhibitor with Ki value of 96 nM.	312.3	575474-82-7	62	198.527	<1		http://www.selleck.cn/products/r112.html	C16H13FN4O2_x000D_	free base	N/A	OC1=CC=CC(=C1)NC2=NC=C(F)C(=N2)NC3=CC(=CC=C3)O	3.933	2	4	4
S6520	WHI-P180	c3	L2000-11	VEGFR	Protein Tyrosine Kinase	WHI-P180 is a multi-kinase inhibitor with IC50 values of 4.5 and 66 nM for the human proto-oncogene RET and kinase insert domain receptor (KDR) , respectively.	297.31	211555-08-7	59	198.446	<1		http://www.selleck.cn/products/whi-p180.html	C16H15N3O3_x000D_	free base	N/A	COC1=CC2=NC=NC(=C2C=C1OC)NC3=CC(=CC=C3)O	3.202	4	2	4
S6523	RG14620	d3	L2000-11	EGFR	Protein Tyrosine Kinase	RG14620, an EGFR inhibitor of the tyrphostin family, directly inhibits the transport function of ABCG2 .	275.13	136831-49-7	55	199.905	<1		http://www.selleck.cn/products/rg14620.html	C14H8Cl2N2_x000D_	free base	Tyrphostin RG14620	ClC1=CC(=CC(=C1)Cl)\C=C(C#N)/C2=CC=CN=C2	3.833	1	0	2
S6533	Briciclib	e3	L2000-11	Others	Others	Briciclib is a water soluble derivative of ON-013100, a small molecule that binds to and inhibits eukaryotic translation initiation factor 4E (eIF4E) .	474.42	865783-99-9	95	200.245	<1		http://www.selleck.cn/products/briciclib.html	C19H23O10PS_x000D_	free base	ON-014185	COC1=CC(=C(/C=C/[S](=O)(=O)CC2=CC=C(OC)C(=C2)O[P](O)(O)=O)C(=C1)OC)OC	2.319	7	0	10
S6537	CVT-313	f3	L2000-11	CDK	Autophagy	CVT-313 is a potent CDK2 inhibitor with an IC50 of 0.5 microM in vitro. It has no effect on other, nonrelated ATP-dependent serine/threonine kinases.	400.47	199986-75-9	80	199.765	<1		http://www.selleck.cn/products/cvt-313.html	C20H28N6O3_x000D_	free base	N/A	COC1=CC=C(CNC2=NC(=NC3=C2N=C[N]3C(C)C)N(CCO)CCO)C=C1	2.217	4	3	10
S6541	MTX-211	g3	L2000-11	EGFR	Protein Tyrosine Kinase	MTX-211 is a first-in-class dual inhibitor of PI3K and EGFR kinase .	478.33	1952236-05-3	24	50.1746	<1		http://www.selleck.cn/products/mtx-211.html	C20H14Cl2FN5O2S_x000D_	free base	N/A	C[S](=O)(=O)NC1=CC(=CN=C1Cl)C2=CC3=C(NC4=CC=C(F)C(=C4)Cl)N=CN=C3C=C2	4.499	5	2	5
S6543	ZD-4190	h3	L2000-11	VEGFR	Protein Tyrosine Kinase	ZD-4190 is a submicromolar inhibitor of VEGF RTK activity in vitro with IC50 values of 29 ± 4 nM and 708 ± 63 nM for KDR and Flt-1, respectively.	459.27	413599-62-9	12	26.1284	<1		http://www.selleck.cn/products/zd-4190.html	C19H16BrFN6O2_x000D_	free base	N/A	COC1=CC2=C(NC3=CC=C(Br)C=C3F)N=CN=C2C=C1OCC[N]4C=CN=N4	4.229	6	1	7
S6555	AZD2098	a4	L2000-11	CCR	Immunology & Inflammation	AZD2098 is a potent and bioavailable CCR4 receptor antagonist with pIC50 of 7.8.	334.18	566203-88-1	67	200.491	<1		http://www.selleck.cn/products/azd2098.html	C11H9Cl2N3O3S_x000D_	free base	N/A	COC1=NC=CN=C1N[S](=O)(=O)C2=C(Cl)C(=CC=C2)Cl	2.407	5	1	4
S6610	GSK2981278	b4	L2000-11	Others	Others	GSK2981278 is a highly potent and selective inverse agonist for RORγ .	461.61	1474110-21-8	92	199.302	<1		http://www.selleck.cn/products/gsk2981278.html	C25H35NO5S_x000D_	free base	N/A	CCC1=CC=C(C=C1)N(CC(C)C)[S](=O)(=O)C2=CC=C(OCC3CCOCC3)C(=C2)CO	4.456	4	1	10
S7102	VE-822	c4	L2000-11	ATM/ATR	PI3K/Akt/mTOR	VE-822 is an ATR inhibitor with IC50 of 19 nM in HT29 cells.	463.55	1232416-25-9	36	77.6615	<1		http://selleckchem.com/products/ve-822.html	C24H25N5O3S	free base	VX970	CNCC1=CC=C(C=C1)C2=NOC(=C2)C3=C(N)N=CC(=N3)C4=CC=C(C=C4)[S](=O)(=O)C(C)C	3.697	6	2	7
S7889	Xanthohumol	d4	L2000-11	COX	Metabolism	Xanthohumol, a prenylated chalcone from hop, inhibits COX-1 and COX-2 activity and shows chemopreventive effects. Phase 1.	354.4	6754-58-1	70	197.517	<1		http://selleckchem.com/products/xanthohumol.html	C21H22O5	free base	N/A	COC1=C(C(=C(CC=C(C)C)C(=C1)O)O)C(=O)\C=C\C2=CC=C(O)C=C2	4.816	2	3	6
S8676	Glumetinib	e4	L2000-11	c-Met	Protein Tyrosine Kinase	Glumetinib (SCC244) is a potent and highly selective c-Met inhibitor with an IC50 of 0.42 ± 0.02 nmol/L. Glumetinib has greater than 2,400-fold selectivity for c-Met over those 312 kinases evaluated, including the c-Met family member RON and highly homologous kinases Axl, Mer, and TyrO3.	459.48	1642581-63-2	11	23.9401	<1		http://www.selleck.cn/products/glumetinib.html	C21H17N9O2S_x000D_	free base	N/A	C[N]1C=C(C=N1)C2=C[N]3C(=NC=C3[S](=O)(=O)[N]4N=CC5=NC=C(C=C45)C6=C[N](C)N=C6)C=C2	1.725	7	0	4
S8701	MK-8353 (SCH900353)	f4	L2000-11	ERK	MAPK	MK-8353 (SCH900353) is an orally bioavailable, selective, and potent <b>ERK</b> inhibitor that inhibits activated ERK1 and ERK2 in vitro, with IC50 values of 23.0 nM and 8.8 nM, respectively (IMAP kinase assay), and nonactivated ERK2, with an IC50 of 0.5 nM (MEK1-ERK2-coupled assay).	691.84	1184173-73-6	50	72.271	<1		http://www.selleck.cn/products/mk-8353-sch900353.html	C37H41N9O3S_x000D_	Free Base	N/A	CSC1(CCN(CC(=O)N2CCC(=CC2)C3=CC=C(C=C3)C4=N[N](C)C=N4)C1)C(=O)NC5=CC=C6[NH]N=C(C7=CC=C(OC(C)C)N=C7)C6=C5	4.176	7	2	10
S8739	PLX51107	g4	L2000-11	Epigenetic Reader Do	Epigenetics	PLX51107 is as a novel <b>BET</b> inhibitor with modest preference for bromodomain-1 (BD1) versus bromodomain-2 (BD2) within each BET protein (Kd = 1.6, 2.1, 1.7, and 5 nM for BD1 and 5.9, 6.2, 6.1 and 120 nM for BD2 of BRD2, BRD3, BRD4, and BRDT, respectively. Among non-BET proteins, PLX51107 shows significant interactions only with the bromodomains of CBP and EP300 (p300) (Kd in the 100 nM rang…	438.48	1627929-55-8	88	200.693	<1		http://www.selleck.cn/products/plx51107.html	C26H22N4O3_x000D_	Free Base	N/A	CC([N]1C=C(C2=CC=C(C=C2)C(O)=O)C3=NC=C(C=C13)C4=C(C)ON=C4C)C5=CC=CC=N5	4.288	5	0	5
S8753	INCB054329（INCB-054329,INCB-54329）	h4	L2000-11	Epigenetic Reader Do	Epigenetics	INCB054329(INCB-054329; INCB-54329) is a structurally distinct <b>bromodomain and extraterminal domain (BET)</b> inhibitor with IC50 values of 44 nM, 5 nM, 9 nM, 1 nM, 28 nM, 3 nM, 119 nM and 63 nM for BRD2-BD1, BRD2-BD2, BRD3-BD1, BRD3-BD2, BRD4-BD1, BRD4-BD2, BRDT-BD1 and BRDT-BD2, respectively.	348.36	1628607-64-6	70	200.942	˂1		http://www.selleck.cn/products/incb054329.html	C19H16N4O3_x000D_	Free Base	N/A	CC1=C(C(=NO1)C)C2=CC=C3NC(=O)N4C(COC2=C34)C5=NC=CC=C5	1.884	5	1	2
S8769	Tinostamustine(EDO-S101)	a5	L2000-11	HDAC	Epigenetics	Tinostamustine(EDO-S101) is a first-in-class <b>alkylating deacetylase</b> inhibitor with IC50 values of 9 nM, 9 nM, 25 nM and 107 nM for HDAC1, HDAC2, HDAC3 and HDAC8 (Class 1 HDACs) respectively and 6 nM, 72 nM for HDAC6 and HDAC10 (Class II HDACs).	415.36	1236199-60-2	14	33.7057	<1		http://www.selleck.cn/products/tinostamustine.html	C19H28Cl2N4O2_x000D_	Free Base	N/A	C[N]1C(=NC2=CC(=CC=C12)N(CCCl)CCCl)CCCCCCC(=O)NO	4.36	2	1	12
S8788	CH7057288	b5	L2000-11	Trk receptor	Protein Tyrosine Kinase	CH7057288 is a potent and selective <b>TRK</b> inhibitor with IC50 values of 1.1 nM, 7.8 nM and 5.1 nM for TRKA, TRKB, and TRKC respectively.	569.67	2095616-82-1	100	175.54	<1		http://www.selleck.cn/products/ch7057288.html	C32H31N3O5S_x000D_	Free Base	N/A	CC1=CC(=CC(=N1)C#CC2=CC3=C(C=C2)C4=C(O3)C(C)(C)C5=CC(=CC=C5C4=O)N[S](C)(=O)=O)C(=O)NC(C)(C)C	5.151	6	2	6
S8791	Zanubrutinib (BGB-3111)	c5	L2000-11	BTK	Protein Tyrosine Kinase	Zanubrutinib (BGB-3111) is a potent, specific and irreversible <b>BTK</b> inhibitor that has been shown to have a lower off-target inhibitory activity on other kinases, including ITK, JAK3 and EGFR.	471.55	1691249-45-2	94	199.343	<1		http://www.selleck.cn/products/zanubrutini-bgb-3111.html	C27H29N5O3_x000D_	Free Base	N/A	NC(=O)C1=C2NCCC(C3CCN(CC3)C(=O)C=C)[N]2N=C1C4=CC=C(OC5=CC=CC=C5)C=C4	3.478	4	2	6
S8795	FDL169	d5	L2000-11	CFTR	Transmembrane Transporters	FDL169 is a <b>CFTR</b> corrector that is designed to fix and restore the function of the defective CFTR protein.	486.49	1628416-28-3	33	67.8328	<1		http://www.selleck.cn/products/fdl169.html	C27H23FN4O4	Free Base	N/A	CCOC1=CC=C2C(=C1)C(=O)N(CC(=O)N(C)C3=CC=C4N=C(C)OC4=C3)N=C2C5=CC(=CC=C5)F	3.87	6	0	6
S8804	PF-06700841	e5	L2000-11	JAK	JAK/STAT	PF-06700841 is a potent inhibitor of <b>Tyk2</b> and <b>Jak1</b> with IC50s of 23 nM, 17 nM, 77 nM for Tyk2, Jak1 and Jak2 respectively. It has appropriate in-family selectivity against JAK2 and JAK3.	389.4	1883299-62-4	78	200.308	<1		http://www.selleck.cn/products/pf-06700841.html	C18H21F2N7O_x000D_	Free Base	PF-841	C[N]1C=C(NC2=NC=CC(=N2)N3CC4CCC(C3)N4C(=O)C5CC5(F)F)C=N1	1.608	4	1	4
S8817	HS-10296	f5	L2000-11	EGFR	Protein Tyrosine Kinase	HS-10296 is a small molecule inhibitor of <b>EGFR-activating mutations and T790M-resistant mutation</b> with limited activity against wild-type EGFR.	525.64	1899921-05-1	100	190.244	<1		http://www.selleck.cn/products/hs-10296.html	C30H35N7O2_x000D_	Free Base	N/A	COC1=C(NC2=NC(=CC=N2)C3=C[N](C4CC4)C5=C3C=CC=C5)C=C(NC(=O)C=C)C(=C1)N(C)CCN(C)C	5.16	4	2	11
S8821	GSK3179106	g5	L2000-11	c-RET	Apoptosis	GSK3179106 is a potent, selective, and gut-restricted pyridone hinge binder small molecule <b>RET kinase</b> inhibitor with a RET IC50 of 0.3 nM and is efficacious in vivo.	467.41	1627856-64-7	93	198.969	<1		http://www.selleck.cn/products/gsk3179106.html	C22H21F4N3O4_x000D_	Free Base	N/A	CCOC1=CC(=O)NC=C1C2=CC=C(CC(=O)NC3=NOC(=C3)C(C)(C)C(F)(F)F)C(=C2)F	3.357	5	2	8
S8822	Ligandrol (LGD-4033, VK-5211)	h5	L2000-11	Androgen Receptor	Endocrinology & Hormones	Ligandrol (LGD-4033, VK-5211) is a novel nonsteroidal, oral selective <b>androgen receptor</b> modulator with high affinity (Ki of ∼1 nM) and selectivity.	338.25	1165910-22-4	68	201.035	<1		http://www.selleck.cn/products/lgd-4033-vk-5211.html	C14H12F6N2O_x000D_	Free Base	N/A	OC(C1CCCN1C2=CC(=C(C=C2)C#N)C(F)(F)F)C(F)(F)F	3.799	0	1	4
S8823	ABX-1431	a6	L2000-11	Lipase	Metabolism	ABX-1431 is a highly potent, selective, and CNS-penetrant <b>Monoacylglycerol lipase (MGLL)</b> inhibitor with IC50 values of 14 nM and 27 nM for hMGLL and mMGLL respectively.	507.39	1446817-84-0	100	197.087	<1		http://www.selleck.cn/products/abx-1431.html	C20H22F9N3O2_x000D_	Free Base	N/A	FC(F)(F)C(OC(=O)N1CCN(CC1)CC2=C(C=C(C=C2)C(F)(F)F)N3CCCC3)C(F)(F)F	5.372	2	0	8
S8840	SEL120 (SEL120-34，SEL120-34A)	b6	L2000-11	CDK	Cell Cycle	SEL120(SEL120-34,SEL120-34A) is a novel inhibitor of <b>Cyclin-dependent kinase 8 (CDK8)</b> with IC50 values of 4.4 nM and 10.4 nM for CDK8/Cyclin C and CDK19/CyclinC respectively.	450.6	1609522-33-9	11	24.4119	90	199.734	http://www.selleck.cn/products/sel120.html	C15H19Br2ClN4_x000D_	Free Base	N/A	Cl.CC1=C2N=C(N3CCNCC3)[N]4CCCC(=C24)C(=C1Br)Br	4.572	1	1	1
S8842	BAY-218	c6	L2000-11	AhR	Metabolism	BAY-218 is a potent and selective small-molecule AhR inhibitor, inhibiting AhR nuclear translocation, dioxin response element (DRE)-luciferase reporter expression and AhR-regulated target gene expression induced by both exogenous and endogenous AhR ligands.	401.82	2162982-11-6	80	199.094	<1		http://www.selleck.cn/products/bay-218.html	C20H17ClFN3O3_x000D_	free base	N/A	CC(CO)NC(=O)C1=CC(=NN(C2=CC=CC(=C2)F)C1=O)C3=CC=C(Cl)C=C3	3.106	3	2	5
S8854	JNJ-38877618(OMO-1)	d6	L2000-11	c-Met	Protein Tyrosine Kinase	JNJ-38877618 (OMO-1) is a potent, highly selective, orally bioavailable MET kinase inhibitor with binding affinity (Kd) of 1.4 nM and enzyme inhibitory activity against wt and M1268T mutant MET (2 and 3 nM IC50).	374.35	943540-74-7	10	26.713	<1		http://www.selleck.cn/products/jnj-38877618.html	C20H12F2N6_x000D_	free base	N/A	FC(F)(C1=CC2=C(C=C1)N=CC=C2)C3=NN=C4C=CC(=N[N]34)C5=CC=NC=C5	3.252	5	0	3
S8867	Bentamapimod	e6	L2000-11	JNK	MAPK	Bentamapimod (AS602801) is a novel, orally active JNK inhibitor with IC50 values of 80 nM, 90 nM and 230 nM for JNK1, JNK2 and JNK3 respectively.	457.55	848344-36-5	24	52.4533	<1		http://www.selleck.cn/products/bentamapimod.html	C25H23N5O2S_x000D_	free base	N/A	N#CC(C1=NC2=CC=CC=C2S1)C3=NC(=NC=C3)OCC4=CC=C(CN5CCOCC5)C=C4	4.228	5	0	7
S9055	Salvianolic acid A	f6	L2000-11	Others	antioxidant	An antioxidant and free radical scavenging compound extracted from S. miltiorrhiza that has been investigated for its cardioprotective and chemopreventative properties	494.447	96574-01-5	10	20.2246				C26H22O10	free base	FS73769	OC(=O)C(CC1=CC(=C(O)C=C1)O)OC(=O)\C=C\C2=C(/C=C/C3=CC(=C(O)C=C3)O)C(=C(O)C=C2)O	4.209	3	6	9
S9080	Anhydroicaritin	g6	L2000-11	Others	Others	Icaritin has hormone regulation activity. Icaritin has cardiovascular function improvement activity. Icaritin has anticancer activity, can induce S phase arrest and apoptosis, inhibit ENKL cell proliferation. Icaritin has anti-MM activity, mainly mediated by inhibiting IL-6/JAK2/STAT3 signaling. Icariside II inhibits pre-osteoclast RAW264.7 growth , which maybe contribute to the efficiency of Her…	368.38	118525-40-9	10	27.1459				C21H20O6	free base	3,5,7-Trihydroxy-2-(4-methoxyphenyl)-8-(3-methyl-2-buten-1-yl)-4H-1-benzopyran-4-one	COC1=CC=C(C=C1)C2=C(O)C(=O)C3=C(O)C=C(O)C(=C3O2)CC=C(C)C	3.954	3	3	4
S9366	5'-Adenylic acid	h6	L2000-11	5'-AMP-activated protein kinase	Cancer	Adenosine 5'-monophosphate is an ester of phosphoric acid with the nucleoside adenosine.	347.221	61-19-8	34.9	100.512				C10H14N5O7P	free base		NC1=NC=NC2=C1N=C[N]2C3OC(CO[P](O)(O)=O)C(O)C3O	-1.952	5	3	4
S2933	AM580	a7	L2000-11	Retinoid Receptor	Metabolism	AM580 is a <b>retinoic acid receptor</b> agonist with Kd values of 8 nM, 131 nM and 450 nM for RARα, RARβ and RARγ.	351.44	102121-60-8	70	199.181	<1		http://www.selleck.cn/products/am580.html	<p>C<sub>22</sub>H<sub>25</sub>NO<sub>3</sub></p>_x000D_	Free Base	N/A	CC1(C)CCC(C)(C)C2=C1C=CC(=C2)C(=O)NC3=CC=C(C=C3)C(O)=O	4.673	2	1	3
S2934	Ensartinib (X-396) dihydrochloride	b7	L2000-11	ALK	Angiogenesis	Ensartinib (X-396) is a potent new-generation <b>ALK</b> inhibitor with high activity against a broad range of known crizotinib-resistant ALK mutations and CNS metastases. It potently inhibits both wild-type ALK and ALK variants (F1174, C1156Y, L1196M, S1206R, T1151, and G1202R mutants) with in vitro IC50s of <4 nM.	634.36	2137030-98-7	100	157.639	27	42.5626	http://www.selleck.cn/products/ensartinib-dihydrochloride.html	<p>C<sub>26</sub>H<sub>29</sub>Cl<sub>4</sub>FN6O<sub>3</sub></p>_x000D_	Dihydrochloride	N/A	Cl.Cl.CC1CN(CC(C)N1)C(=O)C2=CC=C(NC(=O)C3=NN=C(N)C(=C3)OC(C)C4=C(Cl)C(=CC=C4Cl)F)C=C2	5.051	5	3	6
S6490	Vadadustat	c7	L2000-11	HIF	Angiogenesis	Vadadustat is a novel, titratable, oral <b>HIF-PH</b> inhibitor.	306.7	1000025-07-9	61	198.891	<1		http://www.selleck.cn/products/vadadustat.html	<p>C<sub>14</sub>H<sub>11</sub>ClN<sub>2</sub>O<sub>4</sub></p>_x000D_	Free Base	AKB-6548, B-506, PG-1016548	OC(=O)CNC(=O)C1=NC=C(C=C1O)C2=CC=CC(=C2)Cl	1.738	3	2	4
S6531	Bohemine	d7	L2000-11	CDK	Cell Cycle	Bohemine is a <b>CDK</b> inhibitor with IC50s of 4.6, 83, and 2.7 μM for Cdk2/cyclin E, Cdk2/cyclin A, and Cdk9/cyclin T1, respectively.	340.42	189232-42-6	68	199.753	<1		http://www.selleck.cn/products/bohemine.html	<p>C<sub>18</sub>H<sub>24</sub>N<sub>6</sub>O</p>_x000D_	Free Base	N/A	CC(C)[N]1C=NC2=C1N=C(NCCCO)N=C2NCC3=CC=CC=C3	2.482	3	3	8
S6539	ASP5878	e7	L2000-11	FGFR	Protein Tyrosine Kinase	ASP5878 is a novel <b>FGFR</b>-selective inhibitor with IC50 values of 0.47, 0.60, 0.74, and 3.5 nmol/L for recombinant FGFR1, 2, 3, and 4, respectively.	407.37	1453208-66-6	81	198.836	<1		http://www.selleck.cn/products/asp5878.html	<p>C<sub>18</sub>H<sub>19</sub>F<sub>2</sub>N<sub>5</sub>O<sub>4</sub></p>_x000D_	Free Base	N/A	COC1=C(F)C(=C(F)C(=C1)OC)COC2=CN=C(NC3=C[N](CCO)N=C3)N=C2	2.178	6	2	9
S6546	PD153035	f7	L2000-11	EGFR	Protein Tyrosine Kinase	PD153035 is a specific and potent inhibitor of the <b>epidermal growth factor (EGF) receptor tyrosine kinase</b> (Ki = 5.2 pM).	360.21	153436-54-5	6	16.657	<1		http://www.selleck.cn/products/pd153035.html	<p>C<sub>16</sub>H<sub>14</sub>BrN<sub>3</sub>O<sub>2</sub></p>_x000D_	Free Base	N/A	COC1=CC2=C(C=C1OC)C(=NC=N2)NC3=CC(=CC=C3)Br	4.193	4	1	4
S6551	Adelmidrol	g7	L2000-11	Immunology & Inflamm	Immunology & Inflammation	Adelmidrol is an analogue of palmitoylethanolamide (PEA) with anti-inflammatory activities.	274.36	1675-66-7	55	200.467	55	200.467	http://www.selleck.cn/products/adelmidrol.html	<p>C<sub>13</sub>H<sub>26</sub>N<sub>2</sub>O<sub>4</sub></p>_x000D_	Free Base	N/A	OCCNC(=O)CCCCCCCC(=O)NCCO	-0.001	2	4	12
S6558	Irosustat (STX64, BN83495)	h7	L2000-11	Others	Others	Irosustat (STX64, BN83495), a tricyclic coumarin sulfamate, is an orally active, nonsteroid-based, irreversible <b>steroid sulfatase</b> inhibitor with an IC50 of 8 nM.	309.34	288628-05-7	62	200.427	<1		http://www.selleck.cn/products/irosustat.html	<p>C<sub>14</sub>H<sub>15</sub>NO<sub>5</sub>S</p>_x000D_	Free Base	N/A	N[S](=O)(=O)OC1=CC=C2C3=C(CCCCC3)C(=O)OC2=C1	2.527	3	1	2
S6595	THZ531	a8	L2000-11	CDK	Cell Cycle	THZ531 is a selective covalent inhibitor of <b>CDK12</b> and <b>CDK13</b> with IC50 values of 158 and 69 nM, respectively.	558.07	1702809-17-3	100	179.189	<1		http://www.selleck.cn/products/thz531.html	<p>C<sub>30</sub>H<sub>32</sub>ClN<sub>7</sub>O<sub>2</sub></p>_x000D_	Free Base	N/A	CN(C)C/C=C/C(=O)NC1=CC=C(C=C1)C(=O)N2CCCC(C2)NC3=NC(=C(Cl)C=N3)C4=C[NH]C5=C4C=CC=C5	4.645	4	3	8
S6616	ETC-159	b8	L2000-11	Wnt/beta-catenin	Stem Cells & Wnt	ETC-159 is an orally available, potent <b>porcupine</b> inhibitor with an IC50 of 2.9 nM for inhibiting β-catenin reporter activity in STF3A cells.	391.38	1638250-96-0	78	199.295	<1		http://www.selleck.cn/products/etc-159.html	<p>C<sub>19</sub>H<sub>17</sub>N<sub>7</sub>O<sub>3</sub></p>_x000D_	Free Base	ETC-1922159	CN1C(=O)N(C)C2=C([N](CC(=O)NC3=NN=C(C=C3)C4=CC=CC=C4)C=N2)C1=O	1.404	6	1	4
S6617	MSX-122	c8	L2000-11	CXCR	Immunology & Inflammation	MSX-122 is a novel small molecule and partial <b>CXCR4</b> antagonist (IC50~10 nM).	292.34	897657-95-3	3	10.262	<1		http://www.selleck.cn/products/msx-122.html	<p>C<sub>16</sub>H<sub>16</sub>N<sub>6</sub></p>_x000D_	Free Base	N/A	C(NC1=NC=CC=N1)C2=CC=C(CNC3=NC=CC=N3)C=C2	2.099	4	2	6
S6619	ABT 702 dihydrochloride	d8	L2000-11	Adenosine Receptor	GPCR & G Protein	ABT-702 is a novel, potent non-nucleoside <b>Adenosine kinase</b> inhibitor with an IC50 of 1.7 nM. It has oral activity in animal models of pain and inflammation.	536.25	1188890-28-9	100	186.48	<1		http://www.selleck.cn/products/abt-702-dihydrochloride.html	<p>C<sub>22</sub>H<sub>21</sub>BrCl<sub>2</sub>N<sub>6</sub>O</p>_x000D_	Dihydrochloride	N/A	Cl.Cl.NC1=C2C(=NC=N1)N=C(C=C2C3=CC(=CC=C3)Br)C4=CN=C(C=C4)N5CCOCC5	4.441	5	1	3
S6620	Danirixin (GSK1325756)	e8	L2000-11	CXCR	Immunology & Inflammation	Danirixin (GSK1325756) is a small molecule, non-peptide, high affinity (IC50 for CXCL8 binding = 12.5 nM), selective, and reversible <b>CXCR2</b> antagonist.	441.9	954126-98-8	88	199.14	<1		http://www.selleck.cn/products/danirixin.html	<p>C<sub>19</sub>H<sub>21</sub>ClFN<sub>3</sub>O<sub>4</sub>S</p>_x000D_	Free Base	N/A	CC1=C(NC(=O)NC2=C(O)C(=C(Cl)C=C2)[S](=O)(=O)C3CCCNC3)C=CC=C1F	3.255	3	4	4
S6625	Temsavir (BMS-626529)	f8	L2000-11	HIV Protease	Microbiology	Temsavir (BMS-626529) is a novel small-molecule <b>HIV-1 attachment</b> inhibitor active against both CCR5- and CXCR4-tropic viruses.	473.48	701213-36-7	95	200.642	<1		http://www.selleck.cn/products/temsavir-bms-626529.html	<p>C<sub>24</sub>H<sub>23</sub>N<sub>7</sub>O<sub>4</sub></p>_x000D_	Free Base	N/A	COC1=CN=C([N]2C=NC(=N2)C)C3=C1C(=C[NH]3)C(=O)C(=O)N4CCN(CC4)C(=O)C5=CC=CC=C5	1.174	7	1	5
S6627	E-4031 dihydrochloride	g8	L2000-11	Potassium Channel	Transmembrane Transporters	E-4031 is an experimental class III antiarrhythmic drug that blocks potassium channels of the hERG-type.	474.44	113559-13-0	30	63.2324	48	101.172	http://www.selleck.cn/products/e-4031-dihydrochloride.html	<p>C<sub>21</sub>H<sub>29</sub>Cl<sub>2</sub>N<sub>3</sub>O<sub>3</sub>S</p>_x000D_	Dihydrochloride	N/A	Cl.Cl.CC1=CC=CC(=N1)CCN2CCC(CC2)C(=O)C3=CC=C(N[S](C)(=O)=O)C=C3	3.05	4	1	7
S6628	E7820	h8	L2000-11	Others	Others	E7820 is a unique angiogenesis inhibitor with antitumor activities.	336.37	289483-69-8	67	199.185	<1		http://www.selleck.cn/products/e7820.html	<p>C<sub>17</sub>H<sub>12</sub>N<sub>4</sub>O<sub>2</sub>S</p>_x000D_	Free Base	N/A	CC1=C2C(=C(N[S](=O)(=O)C3=CC(=CC=C3)C#N)C=C1)[NH]C=C2C#N	2.855	2	2	3
S6633	AM 095	a9	L2000-11	LPA Receptor	GPCR & G Protein	AM095 is an antagonist of the <b>LPA type 1 receptor</b> with IC50 values of 0.98 and 0.73 μM for recombinant human and mouse LPA1, respectively.	456.49	1228690-36-5	91	199.347	<1		http://www.selleck.cn/products/am-095.html	<p>C<sub>27</sub>H<sub>24</sub>N<sub>2</sub>O<sub>5</sub></p>_x000D_	Free Base	N/A	CC(OC(=O)NC1=C(ON=C1C)C2=CC=C(C=C2)C3=CC=C(CC(O)=O)C=C3)C4=CC=CC=C4	5.284	5	1	8
S6638	AMG-333	b9	L2000-11	Others	Others	AMG-333 is a potent and highly selective antagonist of <b>TRPM8</b> with IC50 values of 13 nM and 30 nM for human TRPM8 and rat TRPM8.	453.32	1416799-28-4	91	200.741	<1		http://www.selleck.cn/products/amg-333.html	<p>C<sub>20</sub>H<sub>12</sub>F<sub>5</sub>N<sub>3</sub>O<sub>4</sub></p>_x000D_	Free Base	N/A	OC(=O)C1=CN=C(C=C1)C(=O)NC(C2=CC(=C(OC(F)(F)F)C=C2)F)C3=C(F)C=CC=N3	4.843	5	1	7
S6644	Radiprodil (RGH-896)	c9	L2000-11	NMDAR	Neuronal Signaling	Radiprodil (RGH-896) is a <B>NR2B-selective NMDA receptor</b> antagonist, initially developed for the treatment of neuropathic pain.	397.4	496054-87-6	79	198.792	<1		http://www.selleck.cn/products/radiprodil.html	<p>C<sub>21</sub>H<sub>20</sub>FN<sub>3</sub>O<sub>4</sub></p>_x000D_	Free Base	N/A	FC1=CC=C(CC2CCN(CC2)C(=O)C(=O)NC3=CC4=C(NC(=O)O4)C=C3)C=C1	2.883	4	2	4
S6645	AZD-5069	d9	L2000-11	CXCR	Immunology & Inflammation	AZD-5069 is a novel antagonist of <b>CXCR2</b>, which is shown to inhibit binding of CXCL8 to CXCR2 with a pIC50 value of 8.8 and inhibit CXCL8 binding to CXCR1 with pIC50 values of 6.5.	476.52	878385-84-3	95	199.362	<1		http://www.selleck.cn/products/azd-5069.html	<p>C<sub>18</sub>H<sub>22</sub>F<sub>2</sub>N<sub>4</sub>O<sub>5</sub>S<sub>2</sub></p>_x000D_	Free Base	N/A	CC(OC1=NC(=NC(=C1)N[S](=O)(=O)N2CCC2)SCC3=C(F)C(=CC=C3)F)C(O)CO	1.88	5	3	10
S6646	CPI-444	e9	L2000-11	Adenosine Receptor	GPCR & G Protein	CPI-444 is a potent and selective <b>Adenosine A2A receptor</b> antagonist. It binds to A2A receptors with a Ki of 3.54 nmol/L and demonstrates a greater than 50-fold selectivity for the A2A receptor over other adenosine receptor subtypes.	407.43	1202402-40-1	81	198.807	<1		http://www.selleck.cn/products/cpi-444.html	<p>C<sub>20</sub>H<sub>21</sub>N<sub>7</sub>O<sub>3</sub></p>_x000D_	Free Base	N/A	CC1=CC=C(O1)C2=C3N=N[N](CC4=NC(=CC=C4)COC5CCOC5)C3=NC(=N2)N	1.769	8	1	6
S6648	PF-06282999	f9	L2000-11	Others	Others	PF-06282999 is an orally bioavailable, irreversible inactivator of <b>myeloperoxidase enzyme</b> and is currently in clinical trials for the potential treatment of cardiovascular diseases.	325.77	1435467-37-0	65	199.527	<1		http://www.selleck.cn/products/pf-06282999.html	<p>C<sub>13</sub>H<sub><span style="font-size: 10px;">12</span></sub>ClN<sub>3</sub>O<sub>3</sub>S</p>_x000D_	Free Base	N/A	COC1=C(C=C(Cl)C=C1)C2=CC(=O)NC(=S)N2CC(N)=O	1.868	3	2	4
S6712	S107	g9	L2000-11	Others	Others	S107 is a <b>Type 1 ryanodine receptor (RyR1)</b> stabilizer that binds RyR1 and enhances the binding affinity of calstabin-1.	209.31	927871-76-9	42	200.659	<1		http://www.selleck.cn/products/s107.html	<p>C<sub>11</sub>H<sub>15</sub>NOS</p>_x000D_	Free Base	N/A	COC1=CC=C2SCCN(C)CC2=C1	2.247	1	0	1
S6713	ITD-1	h9	L2000-11	TGF-beta/Smad	TGF-beta/Smad	ITD-1 is a potent <b>TGF-β</b> inhibitor. It does not block the kinase activity of either type I (TGFBR1) or type II (TGFBR2) TGFβ receptors but potently blocks phosphorylation of the effector SMAD2/3 proteins induced by TGFβ2, and only minimally in response to Activin A.	415.52	1099644-42-4	83	199.75	<1		http://www.selleck.cn/products/itd-1.html	<p>C<sub>27</sub>H<sub>29</sub>NO<sub>3</sub></p>_x000D_	Free Base	N/A	CCOC(=O)C1=C(C)NC2=C(C1C3=CC=C(C=C3)C4=CC=CC=C4)C(=O)CC(C)(C)C2	4.434	3	1	5
S8454	ATN-161 (Ac-PHSCN-NH2)	a11	L2000-11	Integrin	Cytoskeletal Signaling	ATN-161 (Ac-PHSCN-NH2) is a novel small peptide antagonist of integrin α5β1. It binds to several integrins, including α5β1 and αvβ3, that play a role in angiogenesis and tumor progression.	597.64	262438-43-7			13	21.7522	http://selleckchem.com/products/atn-161.html	C23H35N9O8S	free base	N/A	CC(=O)N1CCCC1C(=O)NC(CC2=C[NH]C=N2)C(=O)NC(CO)C(=O)NC(CS)C(=O)NC(CC(N)=O)C(N)=O	-5.261	8	8	15
S8501	DAPTA	b11	L2000-11	CCR	Immunology & Inflammation	DAPTA is a water soluble potent, selective CCR5 antagonist which potently inhibits specific CD4-dependent binding of gp120 Bal (IC50 = 0.06 nM) and CM235 (IC50 = 0.32 nM) to CCR5.	856.88	106362-34-9			100	116.702	http://selleckchem.com/products/dapta.html	C35H56N10O15	free base	D-Ala-peptide T-amide, peptide T	CC(N)C(=O)NC(CO)C(=O)NC(C(C)O)C(=O)NC(C(C)O)C(=O)NC(C(C)O)C(=O)NC(CC(N)=O)C(=O)NC(CC1=CC=C(O)C=C1)C(=O)NC(C(C)O)C(N)=O	-7.366	9	16	24
S8549	AUNP-12	c11	L2000-11	PD-1/PD-L1	Immunology & Inflammation	AUNP-12, a new immune checkpoint modulator, is an inhibitor of the PD-1 pathway.	3261.55	1353563-85-5			100	30.6603	http://selleckchem.com/products/aunp-12.html	C142H226N40O48	0	Aur-012, Aurigene-012, Aurigene NP-12	CCC(C)C(NC(=O)C(CCCCN)NC(=O)C(CCC(O)=O)NN)C(=O)NC(CCC(N)=O)C(=O)NC(C)C(=O)NC(CCCCN)C(=O)N1CCCC1C(=O)NC(C)C(=O)C(=O)C(CC(C)C)NC(=O)C(CCC(N)=O)NC(=O)C(NC(=O)C(NC(=O)C(CCCNC(N)=N)NC(=O)C(CC2=CC=CC=C2)NC(=O)C(CCCCNNC(CC3=CC=CC=C3)C(=O)NC(CO)C(=O)NC(CCC(O)=O)C(=O)NC(CO)C(=O)NC(C(C)O)C(=O)NC(CC(N)=O)C(=O)NC(CO)C=O)NC(=O)C(CC4=CC=CC=C4)NC(=O)C(CO)NC(=O)C(CCC(O)=O)NC(=O)C(CO)NC(=O)C(NC(=O)C(CC(N)=O)NC(=O…	-25.604	36	47	115
S5226	L-carnosine	d11	L2000-11	Others	Others	L-carnosine is an antioxidant naturally found in skeletal muscle, brain tissue, and the heart that protects cells against oxidative stress.	226.23	305-84-0	<1		45	198.913	http://selleckchem.com/products/l-carnosine.html	C9H14N4O3	free base	Karnozin	NCCC(=O)NC(CC1=C[NH]C=N1)C(O)=O	-4.268	3	3	6
S6592	Diquafosol Tetrasodium	e11	L2000-11	P2 Receptor	Neuronal Signaling	Diquafosol Tetrasodium, a P2Y2 receptor agonist, is a pharmaceutical drug for the treatment of dry eye disease.	878.23	211427-08-6			100	113.865	http://www.selleck.cn/products/diquafosol-tetrasodium.html	C18H22N4Na4O23P4_x000D_	Tetrasodium	INS-365	[Na+].[Na+].[Na+].[Na+].OC1C(O)C(OC1CO[P]([O-])(=O)O[P]([O-])(=O)O[P]([O-])(=O)O[P]([O-])(=O)OCC2OC(C(O)C2O)N3C=CC(=O)NC3=O)N4C=CC(=O)NC4=O	-11.332	11	6	14
S6715	YHO-13177	a2	L2000-12	Others	Others	YHO-13177, a novel acrylonitrile derivative, is a potent <b>BCRP</b> inhibitor.	370.47	912287-56-0	74	199.746	<1		http://www.selleck.cn/products/yho-13177.html	<p>C<sub>20</sub>H<sub>22</sub>N<sub>2</sub>O<sub>3</sub>S</p>_x000D_	Free Base	N/A	COC1=C(OC)C=C(C=C1)/C(=C/C2=CC=C(S2)N3CCC(O)CC3)C#N	3.295	2	1	5
S6718	MKT-077	b2	L2000-12	Others	Others	MKT-077 is a newly synthesized, highly water-soluble rhodacyanine dye that exhibits significant antitumor activity in a variety of model systems.	432	147366-41-4	13	30.0926	86	199.074	http://www.selleck.cn/products/mkt-077.html	<p>C<sub>21</sub>H<sub>22</sub>ClN<sub>3</sub>OS<sub>2</sub></p>_x000D_	Free Base	FJ-776	[Cl-].CCN\1C(=O)\C(SC1=C\C2=CC=CC=[N+]2CC)=C3/SC4=CC=CC=C4N3C	2.489	1	0	3
S6723	LXS-196	c2	L2000-12	PKC	Cytoskeletal Signaling	LXS-196 is a selective inhibitor of <b>protein kinase C (PKC)</b>.	472.47	1874276-76-2	22	46.5638	<1		http://www.selleck.cn/products/lxs-196.html	<p>C<sub>22</sub>H<sub>23</sub>F<sub>3</sub>N<sub>8</sub>O</p>_x000D_	Free Base	IDE-196	CC1(N)CCN(CC1)C2=CC=CN=C2NC(=O)C3=NC(=CN=C3N)C4=NC=CC=C4C(F)(F)F	1.6	5	3	5
S6724	SR1001	d2	L2000-12	Others	Others	SR1001 is a <b>RORα</b> inverse agonist with Ki values of 172 nM and 111 nM for RORα and RORγ respectively.	477.4	1335106-03-0	95	198.995	<1		http://www.selleck.cn/products/sr1001.html	<p>C<sub>15</sub>H<sub>13</sub>F<sub>6</sub>N<sub>3</sub>O<sub>4</sub>S<sub>2</sub></p>_x000D_	Free Base	N/A	CC(=O)NC1=NC(=C(S1)[S](=O)(=O)NC2=CC=C(C=C2)C(O)(C(F)(F)F)C(F)(F)F)C	2.137	4	2	7
S6726	MK1064	e2	L2000-12	Others	Others	MK1064 is a selective <b>orexin 2 receptor</b> antagonist (2-SORA) with an IC50 of 18 nM.	461.9	1207253-08-4	92	199.177	<1		http://www.selleck.cn/products/mk1064.html	<p>C<sub>24</sub>H<sub>20</sub>ClN<sub>5</sub>O<sub>3</sub></p>_x000D_	Free Base	N/A	COC1=C(OC)N=C(CNC(=O)C2=CC(=CN=C2C3=NC=CC=C3)C4=CC(=CN=C4)Cl)C=C1	3.298	7	1	7
S6727	AX-024 HCl	f2	L2000-12	CDK	Cell Cycle	AX-024 blocks the interaction of the CD3ε PRS with SH3.1(Nck).	375.86	1704801-24-0	75	199.542	4	10.6423	http://www.selleck.cn/products/ax-024-hcl.html	<p>C<sub>21</sub>H<sub>23</sub>ClFNO<sub>2</sub></p>_x000D_	Hydrochloride	N/A	Cl.COC1=CC2=C(OCC(=C2C3=CC=C(F)C=C3)CN4CCCC4)C=C1	4.579	2	0	4
S6730	CC-401 Hydrochloride	g2	L2000-12	JNK	MAPK	CC-401 is a potent inhibitor of <b>JNK</b> with at least 40-fold selectivity against other related kinases.	424.93	1438391-30-0	85	200.033	85	200.033	http://www.selleck.cn/products/cc-401-hydrochloride.html	<p>C<sub>22</sub>H<sub>25</sub>ClN<sub>6</sub>O</p>_x000D_	Hydrochloride	N/A	Cl.C1CCN(CC1)CCOC2=CC(=CC=C2)C3=N[NH]C4=CC=C(C=C34)C5=NC=N[NH]5	4.527	4	2	6
S6733	Edonerpic maleate	h2	L2000-12	Beta Amyloid	Neuronal Signaling	Edonerpic maleate is a novel neurotrophic agent which can inhibit <b>amyloid-β peptides (Aβ)</b>.	407.48	519187-97-4	81	198.783	81	198.783	http://www.selleck.cn/products/edonerpic-maleate.html	<p>C<sub>20</sub>H<sub>25</sub>NO<sub>6</sub>S</p>_x000D_	Free Base	T-817 maleate	OC1CN(CCCOCCC2=CC3=C(SC=C3)C=C2)C1.OC(=O)\C=C/C(O)=O	-0.67	3	1	9
S6735	JD-5037	a3	L2000-12	Cannabinoid Receptor	GPCR & G Protein	JD-5037 is a peripherally restricted (PR) <b>cannabinoid-1 receptor</b> blocker with an IC50 value of 2 nM for CB1 receptor and > 1000 nM for CB2 receptor.	572.51	1392116-14-1	100	174.669	<1		http://www.selleck.cn/products/id-5037.html	<p>C<sub>27</sub>H<sub>27</sub>Cl<sub>2</sub>N<sub>5</sub>O<sub>3</sub>S</p>_x000D_	Free Base	N/A	CC(C)C(N=C(N[S](=O)(=O)C1=CC=C(Cl)C=C1)N2CC(C3=CC=CC=C3)C(=N2)C4=CC=C(Cl)C=C4)C(N)=O	5.552	5	2	9
S6741	SB-756050	b3	L2000-12	Others	Others	SB-756050 is a selective <b>TGR5</b> agonist (EC50 = 1.3 μM for the human receptor).	500.59	447410-57-3	100	199.764	<1		http://www.selleck.cn/products/sb-756050.html	<p>C<sub>21</sub>H<sub>28</sub>N<sub>2</sub>O<sub>8</sub>S<sub>2</sub></p>_x000D_	Free Base	N/A	COC1=C(OC)C=C(C=C1)[S](=O)(=O)N2CCCN(CC2)[S](=O)(=O)C3=CC(=C(OC)C=C3)OC	1.527	8	0	8
S6746	APD668	c3	L2000-12	GPR	Endocrinology & Hormones	APD668 is a potent <b>GPR119</b> agonist with EC50s of 2.7 and 33 nM for human and rat forms, respectively.	477.51	832714-46-2	96	201.043	<1		http://www.selleck.cn/products/apd668.html	<p>C<sub>21</sub>H<sub>24</sub>FN<sub>5</sub>O<sub>5</sub>S</p>_x000D_	Free Base	JNJ28630368	CC(C)OC(=O)N1CCC(CC1)OC2=NC=NC3=C2C=N[N]3C4=CC=C(C=C4F)[S](C)(=O)=O	2.67	8	0	6
S6749	ASP-9521	d3	L2000-12	Others	Others	ASP-9521 is a selective, orally bioavailable inhibitor of <b>17beta-hydroxysteroid dehydrogenase type 5 (17β-HSD5)</b>.	330.42	1126084-37-4	66	199.746	<1		http://www.selleck.cn/products/asp-9521.html	<p>C<sub>19</sub>H<sub>26</sub>N<sub>2</sub>O<sub>3</sub></p>_x000D_	Free Base	N/A	COC1=CC2=C([NH]C(=C2)C(=O)N3CCC(CC3)CC(C)(C)O)C=C1	2.794	2	1	4
S6754	S1RA	e3	L2000-12	Others	Others	S1RA is a selective <b>sigma-1 receptor (σ1R)</b> antagonist with a reported binding affinity of Ki = 17.0 ± 7.0 nM for human σ1 receptor , selective over the sigma-2 receptor and against a panel of other 170 receptors, enzymes, transporters and ion channels.	337.42	878141-96-9	67	198.566	67	198.566	http://www.selleck.cn/products/s1ra.html	<p>C<sub>20</sub>H<sub>23</sub>N<sub>3</sub>O<sub>2</sub></p>_x000D_	Free Base	E-52862	CC1=CC(=N[N]1C2=CC=C3C=CC=CC3=C2)OCCN4CCOCC4	3.459	3	0	5
S6756	Siramesine HCl	f3	L2000-12	Others	Others	Siramesine is a <b>sigma receptor</b> agonist, selective for the σ2 subtype with IC50 values of 0.12 nM and 17 nM for σ2 and σ1 receptors respectively.	491.05	224177-60-0	98	199.572	<1		http://www.selleck.cn/products/siramesine-hcl.html	<p>C<sub>30</sub>H<sub>32</sub>ClFN<sub>2</sub>O</p>_x000D_	Hydrochloride	Lu 28-179 HCl	Cl.FC1=CC=C(C=C1)[N]2C=C(CCCCN3CCC4(CC3)OCC5=C4C=CC=C5)C6=C2C=CC=C6	6.835	1	0	6
S7716	TAS-116	g3	L2000-12	HSP (e.g. HSP90)	Cytoskeletal Signaling	TAS-116 is a novel, small-molecule <b>HSP90</b> inhibitor which inhibits geldanamycin-FITC binding to HSP90 proteins with Ki values of 34.7 nmol/L, 21.3 nmol/L, >50,000 nmol/L, and >50,000 nmol/L for HSP90α, HSP90β, GRP94, and TRAP1, respectively. Furthermore, TAS-116 does not inhibit other ATPases such as HSP70 (IC50 >200 μmol/L).	454.53	1260533-36-5	91	200.207	<1		http://www.selleck.cn/products/tas-116.html	<p>C<sub>25</sub>H<sub>26</sub>N<sub>8</sub>O</p>_x000D_	Free Base	N/A	CCC1=C(C=CC(=C1)C(N)=O)[N]2N=C(C(C)C)C3=C(C=CN=C23)[N]4C=NC(=C4)C5=C[N](C)N=C5	3.927	5	1	6
S8455	Talabostat (Val-boroPro, PT-100)	h3	L2000-12	DPP-4	Proteases	Talabostat (Val-boroPro, PT-100) is a <b>dipeptidyl peptidase</b> inhibitor with IC50 values of <4 nM, 4 nM, 11 nM, 310 nM, 560 nM and 390 nM for DPP-IV, DPP8, DPP9, QPP, FAP and PEP respectively. It has antineoplastic and hematopoiesis- stimulating activities.	310.18	150080-09-4	62	199.884	62	199.884	http://www.selleck.cn/products/talabostat.html	<p>C<sub>10</sub>H<sub>23</sub>BN<sub>2</sub>O<sub>6</sub>S</p>_x000D_	Free Base	BXCL701, L-valinyl-L-boroproline	CC(C)C(N)C(=O)N1CCCC1B(O)O.C[S](O)(=O)=O	0.33	1	1	3
S8506	SCH-527123	a4	L2000-12	CXCR	Immunology & Inflammation	SCH-527123 is a potent, orally bioavailable <b>CXCR2/CXCR1</b> antagonist with IC50 values of 2.6 nM and 36 nM, respectively.	397.42	473727-83-2	79	198.782	<1		http://www.selleck.cn/products/sch-527123.html	<p>C<sub>21</sub>H<sub>23</sub>N<sub>3</sub>O<sub>5</sub></p>_x000D_	Free Base	N/A	CCC(NC1=C(NC2=C(O)C(=CC=C2)C(=O)N(C)C)C(=O)C1=O)C3=CC=C(C)O3	1.635	4	3	7
S8781	Selpercatinib (LOXO-292, ARRY-192)	b4	L2000-12	c-RET	Apoptosis	Selpercatinib (LOXO-292, ARRY-192) is a potent and specific <b>RET</b> inhibitor with IC50 values of 1 nM, 2 nM, 2 nM, 4 nM, 2 nM, 2 nM for WT RET, RET V804M, RET V804L, RET A883F, RET M918T and RET S891A respectively.	525.6	2152628-33-4	25	47.5647	<1		http://www.selleck.cn/products/loxo-292.html	<p>C<sub>29</sub>H<sub>31</sub>N<sub>7</sub>O<sub>3</sub></p>_x000D_	Free Base	N/A	COC1=NC=C(CN2C3CC2CN(C3)C4=NC=C(C=C4)C5=CC(=C[N]6N=CC(=C56)C#N)OCC(C)(C)O)C=C1	2.884	5	0	8
S8814	TAS6417	c4	L2000-12	EGFR	Angiogenesis	TAS6417 is a novel <b>EGFR</b> inhibitor that targets EGFR exon 20 insertion mutations while sparing wild-type (WT) EGFR. IC50 values ranges from 1.1 ± 0.1 to 8.0 ± 1.1 nmol/L.	396.44	1661854-97-2	79	199.274	<1		http://www.selleck.cn/products/tas6417.html	<p>C<sub>23</sub>H<sub>20</sub>N<sub>6</sub>O</p>_x000D_	Free Base	N/A	CC1=CC(C[N]2C3=NC=NC(=C3C(=C12)C4=CC5=CC=CC=C5N=C4)N)NC(=O)C=C	3.124	4	2	3
S8820	PTC596	d4	L2000-12	BMI-1	Cell Cycle	PTC596 is a second-generation <b>BMI-1</b> inhibitor that accelerates BMI-1 degradation. It inhibits cell proliferation and induces apoptosis in a dose- and time-dependent manner. IC50 values at 72 hours ranged from 68 to 340 nM in mantle cell lymphoma (MCL) cell lines.	420.34	1610964-64-1	84	199.838	<1		http://www.selleck.cn/products/ptc596.html	<div>C<sub>19</sub>H<sub>13</sub>F<sub>5</sub>N<sub>6</sub></div>_x000D_ <div>&nbsp;</div>_x000D_	Free Base	N/A	CC1=NC2=CC=C(F)C=C2[N]1C3=NC(=C(F)C(=N3)N)NC4=CC=C(C=C4)C(F)(F)F	5.366	3	2	4
S8843	AZD7648	e4	L2000-12	DNA-PK	DNA Damage	AZD7648 is a potent inhibitor of <b>DNA-PK</b> with an IC50 of 0.6 nM in biochemical assay and more than 100-fold selective against 396 other kinases.	380.4	2230820-11-6	6	15.7729	<1		http://www.selleck.cn/products/azd7648.html	<p>C<sub>18</sub>H<sub>20</sub>N<sub>8</sub>O<sub>2</sub></p>_x000D_	Free Base	N/A	CN1C(=O)N(C2CCOCC2)C3=NC(=NC=C13)NC4=C[N]5N=CN=C5C=C4C	1.059	6	1	3
S8847	BAY 2402234	f4	L2000-12	Dehydrogenase	Metabolism	BAY 2402234 is a novel and selective <b>dihydroorotate dehydrogenase (DHODH)</b> inhibitor with an IC50 of 1.2 nM.	520.84	2225819-06-5	100	191.998	<1		http://www.selleck.cn/products/bay-2402234.html	<p>C<sub>21</sub>H<sub>18</sub>ClF<sub>5</sub>N<sub>4</sub>O<sub>4</sub></p>_x000D_	Free Base	N/A	CCN1C(=NN(C1=O)C2=C(F)C=C(C(=O)NC3=C(F)C=CC=C3Cl)C(=C2)OC(C)C(F)(F)F)CO	4.103	4	2	8
S8848	TAS-120	g4	L2000-12	FGFR	Protein Tyrosine Kinase	TAS-120 is an irreversible <b>fibroblast growth factor receptor (FGFR)</b> inhibitor which inhibits all 4 subtypes of FGFR with enzyme IC50 values of 3.9 nM, 1.3 nM, 1.6 nM and 8.3 nM for FGFR1, FGFR2, FGFR3 and FGFR4 respectively.	418.45	1448169-71-8	84	200.741	<1		http://www.selleck.cn/products/tas-120.html	<p>C<sub>22</sub>H<sub>22</sub>N<sub>6</sub>O<sub>3</sub></p>_x000D_	Free Base	N/A	COC1=CC(=CC(=C1)C#CC2=N[N](C3CCN(C3)C(=O)C=C)C4=NC=NC(=C24)N)OC	2.402	6	1	6
S8853	Belvarafenib(GDC5573, HM95573, RG6185)	h4	L2000-12	Raf	MAPK	Belvarafenib (GDC5573, HM95573, RG6185) is a selective and orally bioavailable <b>pan-RAF kinase</b> inhibitor with IC50 values of 41 nM, 7 nM and 2 nM for BRAF WT, BRAF(V600E) and CRAF kinases, respectively.	478.93	1446113-23-0	96	200.447	<1		http://www.selleck.cn/products/belvarafenib.html	<p>C<sub>23</sub>H<sub>16</sub>ClFN<sub>6</sub>OS</p>_x000D_	Free Base	N/A	CC1=C(NC(=O)C2=CSC3=C2N=CN=C3N)C4=C(C=C1)C(=NC=C4)NC5=C(F)C(=CC=C5)Cl	5.121	4	3	4
[truncated: 74 more rows]

## Sheet: 384 Chemical Data-965cpds
Catalog Number	Rack Number	384 Plate	Plate Location	Product Name	M.w.	CAS Number	Target	Information	Pathway	Formula	DMSO (mg/mL)Max Solubility	DMSO (mM)Max Solubility	water (mg/mL)Max Solubility	water (mM)Max Solubility	URL	Form	Synonyms	SMILES	ALogP	HBA_Count	HBD_Count	RotatableBond
[truncated: 407 more rows]
