# Supplementary material for: Sex Chromosome-Informed High-Throughput Screening of Anti-Hypertrophic Drugs Using hESC-Derived Cardiomyocytes
Source: Research Square preprint supplement (doi:10.21203/rs.3.rs-6911584/v1), 2025-06-24
Supplement: Supplementary file 2 [file 4455dc4b75aeae8feac119d8.xlsx]

## Sheet: Chemical Data- 3113cpds
Cat	Name	Plate No.	Plate Location	Formulation	Status	Pharmacopoeia	FDA NDA/ANDA	Indication	Target	Pathway	Information	M.w.	CAS Number	DMSO (mg/mL)Max Solubility	DMSO (mM)Max Solubility	Water (mg/mL)Max Solubility	Water (mM)Max Solubility	URL	Formula	Form	Synonyms	SMILES	ALogP	HBA_Count	HBD_Count	RotatableBond
S1005	Axitinib	1	a3	in 10mM DMSO	FDA,DMF,EMA,NDC,PMDA	Martindale:The Extra Pharmacopoeia	202324	Cancer	c-Kit,PDGFR,VEGFR	Protein Tyrosine Kinase	Axitinib is a multi-target inhibitor of VEGFR1, VEGFR2, VEGFR3, PDGFRβ and c-Kit with IC50 of 0.1 nM, 0.2 nM, 0.1-0.3 nM, 1.6 nM and 1.7 nM in Porcine aorta endothelial cells, respectively.	386.47	319460-85-0	35	90.56	<1		http://selleckchem.com/products/Axitinib.html	C22H18N4OS	free base	AG 013736	CNC(=O)C1=CC=CC=C1SC2=CC3=C(C=C2)C(=N[NH]3)\C=C\C4=CC=CC=N4	4.492	3	2	5
S1007	Roxadustat (FG-4592)	1	c3	in 10mM DMSO	CFDA	N/A	N/A	Hematology	HIF	Angiogenesis	Roxadustat (FG-4592) is an HIF-α prolyl hydroxylase inhibitor in a cell-free assay, stabilizes HIF-2 and induces EPO production. Phase 3.	352.34	808118-40-3	70	198.67	<1		http://selleckchem.com/products/fg-4592.html	C19H16N2O5	free base	ASP1517	CC1=NC(=C(O)C2=C1C=C(OC3=CC=CC=C3)C=C2)C(=O)NCC(O)=O	2.306	4	2	5
S1008	Selumetinib (AZD6244)	1	e3	in 10mM DMSO	FDA, NDC	N/A	(NDA) 213756	Cancer	MEK	MAPK	Selumetinib (AZD6244) is a potent, highly selective MEK inhibitor with IC50 of 14 nM for MEK1 and Kd value of 530 nM for MEK2. It also inhibits ERK1/2 phosphorylation with IC50 of 10 nM, no inhibition to p38α, MKK6, EGFR, ErbB2, ERK2, B-Raf, etc. Phase 3.	457.68	606143-52-6	91	198.83	<1		http://selleckchem.com/products/AZD6244.html	C17H15BrClFN4O3	free base	ARRY-142886	C[N]1C=NC2=C(F)C(=C(C=C12)C(=O)NOCCO)NC3=CC=C(Br)C=C3Cl	3.234	3	3	6
S1010	Nintedanib (BIBF 1120)	1	g3	in 10mM DMSO	FDA,DMF,EMA,NDC,PMDA	N/A	205832	Cancer/Respiratory Disease	FGFR,PDGFR,VEGFR	Protein Tyrosine Kinase	Nintedanib (BIBF 1120) is a potent triple angiokinase inhibitor for VEGFR1/2/3, FGFR1/2/3 and PDGFRα/β with IC50 of 34 nM/13 nM/13 nM, 69 nM/37 nM/108 nM and 59 nM/65 nM in cell-free assays. Phase 3.	539.62	656247-17-5	6	11.12	<1		http://selleckchem.com/products/BIBF1120.html	C31H33N5O4	free base	Intedanib	COC(=O)C1=CC=C\2C(=C1)NC(=O)C2=C(NC3=CC=C(C=C3)N(C)C(=O)CN4CCN(C)CC4)/C5=CC=CC=C5	2.965	4	2	8
S1011	Afatinib (BIBW2992)	1	i3	in 10mM DMSO	FDA,DMF,EMA,NDC,PMDA	N/A	201292	Cancer	EGFR,HER2	Protein Tyrosine Kinase	Afatinib (BIBW2992) inhibits EGFR/ErbB irreversibly in vitro with IC50 of 0.5, 0.4, 10, 14, 1 nM for EGFRwt, EGFR L858R , EGFR L858R/T790M ErbB2 (HER2) and ErbB4 (HER4), respectively.	485.94	439081-18-2	97	199.61	<1		http://selleckchem.com/products/BIBW2992.html	C24H25ClFN5O3	Free Base	N/A	CN(C)C/C=C/C(=O)NC1=CC2=C(NC3=CC=C(F)C(=C3)Cl)N=CN=C2C=C1OC4CCOC4	3.917	5	2	8
S1013	Bortezomib (PS-341)	1	k3	in 10mM DMSO	FDA,DMF,EMA,HMA,NDC,PMDA	USP;Martindale:The Extra Pharmacopoeia	204332,204405,205004,205160,205533,208392,208460,208645,209191,210615,210824	Cancer	Proteasome	Proteases	Bortezomib (PS-341) is a potent 20S proteasome inhibitor with Ki of 0.6 nM. It exhibits favorable selectivity towards tumor cells over normal cells.	384.24	179324-69-7	76	197.79	<1		http://selleckchem.com/products/Bortezomib.html	C19H25BN4O4	Free Base	LDP-341, MLM341	CC(C)CC(NC(=O)C(CC1=CC=CC=C1)NC(=O)C2=NC=CN=C2)B(O)O	2.183	4	2	9
S1014	Bosutinib (SKI-606)	1	m3	in 10mM DMSO	FDA,DMF,EMA,NDC,PMDA	N/A	203341	Cancer/Hematology	Src	Angiogenesis	Bosutinib (SKI-606) is a novel, dual Src/Abl inhibitor with IC50 of 1.2 nM and 1 nM in cell-free assays, respectively.	530.45	380843-75-4	100	188.52	<1		http://selleckchem.com/products/Bosutinib.html	C26H29Cl2N5O3	free base	N/A	COC1=C(Cl)C=C(Cl)C(=C1)NC2=C(C=NC3=CC(=C(OC)C=C23)OCCCN4CCN(C)CC4)C#N	4.883	4	1	9
S1021	Dasatinib	1	o3	in 10mM DMSO	FDA,DMF,EMA,HMA,CFDA,NDC,PMDA	Martindale:The Extra Pharmacopoeia	202103	Cancer/Hematology	Bcr-Abl,c-Kit,Src	Angiogenesis	Dasatinib is a novel, potent and multi-targeted inhibitor that targets Abl, Src and c-Kit, with IC50 of <1 nM, 0.8 nM and 79 nM in cell-free assays, respectively.	488.01	302962-49-8	98	200.82	<1		http://selleckchem.com/products/Dasatinib.html	C22H26ClN7O2S	free base	BMS-354825	CC1=NC(=CC(=N1)N2CCN(CCO)CC2)NC3=NC=C(S3)C(=O)NC4=C(Cl)C=CC=C4C	3.439	4	3	7
S1022	Ridaforolimus (Deforolimus, MK-8669)	1	a5	in 10mM DMSO	DMF	N/A	N/A	cancer	mTOR	PI3K/Akt/mTOR	Ridaforolimus (Deforolimus, MK-8669) is a selective mTOR inhibitor with IC50 of 0.2 nM in HT-1080 cell line while not classified as a prodrug, mTOR inhibition and FKBP12 binding is similar to rapamycin. Phase 3.	990.21	572924-54-0	198	199.96	<1		http://selleckchem.com/products/Deforolimus.html	C53H84NO14P	free base	AP23573	COC1CC(CCC1O[P](C)(C)=O)CC(C)C2CC(=O)C(C)\C=C(C)\C(O)C(OC)C(=O)C(C)CC(C)/C=C/C=C/C=C(C)/C(CC3CCC(C)C(O)(O3)C(=O)C(=O)N4CCCCC4C(=O)O2)OC	6.303	12	1	8
S1025	Gefitinib (ZD1839)	1	c5	in 10mM DMSO	FDA,DMF,EMA,HMA,CFDA,NDC,PMDA	EP9.3;BP2019;IP2010	206995,021399	Cancer/Respiratory Disease	EGFR	Protein Tyrosine Kinase	Gefitinib (ZD-1839) is an EGFR inhibitor for Tyr1173, Tyr992, Tyr1173 and Tyr992 in the NR6wtEGFR and NR6W cells with IC50 of 37 nM, 37nM, 26 nM and 57 nM, respectively.	446.9	184475-35-2	89	199.15	<1		http://selleckchem.com/products/Gefitinib.html	C22H24ClFN4O3	free base	N/A	COC1=C(OCCCN2CCOCC2)C=C3C(=NC=NC3=C1)NC4=CC=C(F)C(=C4)Cl	4.203	5	1	8
S1026	Imatinib Mesylate (STI571)	1	e5	in 10mM DMSO	FDA,DMF,EMA,HMA,CFDA,NDC,PMDA	EP9.2;BP2019;IP2010;Martindale:The Extra Pharmacopoeia	078340,079179,204285,204644,205990,206547,207495,207586,207818,208302,208429	Cancer/Hematology	Bcr-Abl,c-Kit,PDGFR	Protein Tyrosine Kinase	Imatinib Mesylate (STI571) is an orally bioavailability mesylate salt of Imatinib, which is a multi-target inhibitor of v-Abl, c-Kit and PDGFR with IC50 of 0.6 μM, 0.1 μM and 0.1 μM in cell-free or cell-based assays, respectively.	589.71	220127-57-1	118	200.1	118	200.1	http://selleckchem.com/products/Imatinib-Mesylate.html	C30H35N7O4S	Mesylate	CGP-57148B, ST-1571 Mesylate	CN1CCN(CC1)CC2=CC=C(C=C2)C(=O)NC3=CC=C(C)C(=C3)NC4=NC=CC(=N4)C5=CC=CN=C5.C[S](O)(=O)=O	3.806	4	2	7
S1028	Lapatinib (GW-572016) Ditosylate	1	g5	in 10mM DMSO	FDA,DMF,EMA,NDC,PMDA	Martindale:The Extra Pharmacopoeia	022059	Cancer	EGFR,HER2	Protein Tyrosine Kinase	Lapatinib (GW-572016) Ditosylate is a potent EGFR and ErbB2 inhibitor with IC50 of 10.8 and 9.2 nM in cell-free assays, respectively.	925.46	388082-77-7	100	108.05	<1		http://selleckchem.com/products/Lapatinib-Ditosylate.html	C43H42ClFN4O10S3	Ditosylat	N/A	CC1=CC=C(C=C1)[S](O)(=O)=O.CC2=CC=C(C=C2)[S](O)(=O)=O.C[S](=O)(=O)CCNCC3=CC=C(O3)C4=CC=C5N=CN=C(NC6=CC=C(OCC7=CC=CC(=C7)F)C(=C6)Cl)C5=C4	9.339	6	2	13
S1029	Lenalidomide (CC-5013)	1	i5	in 10mM DMSO	FDA,DMF,EMA,HMA,CFDA,NDC,PMDA	Martindale:The Extra Pharmacopoeia	021880	Cancer	TNF-alpha	Apoptosis	Lenalidomide (CC-5013) is a TNF-α secretion inhibitor with IC50 of 13 nM in PBMCs.	259.26	191732-72-6	52	200.57	<1		http://selleckchem.com/products/Lenalidomide.html	C13H13N3O3	free base	N/A	NC1=C2CN(C3CCC(=O)NC3=O)C(=O)C2=CC=C1	-0.515	3	2	1
S1030	Panobinostat (LBH589)	1	k5	in 10mM DMSO	FDA,DMF,EMA,NDC,PMDA	Martindale:The Extra Pharmacopoeia	205353	Cancer	HDAC	Epigenetics	Panobinostat (LBH589) is a novel broad-spectrum HDAC inhibitor with IC50 of 5 nM in a cell-free assay. Phase 3.	349.43	404950-80-7	69	197.46	<1		http://selleckchem.com/products/LBH-589.html	C21H23N3O2	Free Base	NVP-LBH589	CC1=C(CCNCC2=CC=C(\C=C\C(=O)NO)C=C2)C3=C([NH]1)C=CC=C3	3.194	1	3	7
S1033	Nilotinib (AMN-107)	1	m5	in 10mM DMSO	FDA,DMF,EMA,NDC,PMDA	EP9.8;Martindale:The Extra Pharmacopoeia	022068	Cancer/Hematology	Bcr-Abl	Angiogenesis	Nilotinib (AMN-107) is a selective Bcr-Abl inhibitor with IC50 less than 30 nM in Murine myeloid progenitor cells.	529.52	641571-10-0	27	50.99	<1		http://selleckchem.com/products/Nilotinib.html	C28H22F3N7O	free base	N/A	CC1=C[N](C=N1)C2=CC(=CC(=C2)C(F)(F)F)NC(=O)C3=CC=C(C)C(=C3)NC4=NC=CC(=N4)C5=CN=CC=C5	5.084	5	2	7
S1035	Pazopanib HCl (GW786034 HCl)	1	o5	in 10mM DMSO	FDA,DMF,EMA,NDC,PMDA	N/A	022465	Angiology/Cancer	c-Kit,PDGFR,VEGFR	Protein Tyrosine Kinase	Pazopanib HCl (GW786034 HCl) is a novel multi-target inhibitor of VEGFR1, VEGFR2, VEGFR3, PDGFR, FGFR, c-Kit and c-Fms with IC50 of 10 nM, 30 nM, 47 nM, 84 nM, 74 nM, 140 nM and 146 nM in cell-free assays, respectively.	473.98	635702-64-6	17	35.87	<1		http://selleckchem.com/products/Pazopanib-Hydrochloride.html	C21H24ClN7O2S	Hydrochloride	N/A	Cl.C[N]1N=C2C=C(C=CC2=C1C)N(C)C3=NC(=NC=C3)NC4=CC=C(C)C(=C4)[S](N)(=O)=O	4.123	5	2	5
S1039	Rapamycin (Sirolimus)	1	a7	in 10mM DMSO	DMF	N/A	N/A	Immunology	Autophagy,mTOR	PI3K/Akt/mTOR	Rapamycin (Sirolimus) is a specific mTOR inhibitor with IC50 of ~0.1 nM HEK293 cells.	914.18	53123-88-9	20	21.88	<1		http://selleckchem.com/products/Rapamycin.html	C51H79NO13	free base	AY 22989，NSC-2260804	COC1CC(CCC1O)CC(C)C2CC(=O)C(C)\C=C(/C)C(O)C(OC)C(=O)C(C)CC(C)/C=C/C=C/C=C(C)/C(CC3CCC(C)C(O)(O3)C(=O)C(=O)N4CCCCC4C(=O)O2)OC	6.295	10	2	6
S1040	Sorafenib Tosylate	1	c7	in 10mM DMSO	FDA,DMF,EMA,HMA,NDC,PMDA	Martindale:The Extra Pharmacopoeia	021923	Cancer	PDGFR,Raf,VEGFR	MAPK	Sorafenib Tosylate is a multikinase inhibitor of Raf-1, B-Raf and VEGFR-2 with IC50 of 6 nM, 22 nM and 90 nM in cell-free assays, respectively.	637.03	475207-59-1	127	199.36	0.01	0.02	http://selleckchem.com/products/Sorafenib-Tosylate.html	C28H24ClF3N4O6S	Tosylate	Bay 43-9006	CNC(=O)C1=CC(=CC=N1)OC2=CC=C(NC(=O)NC3=CC=C(Cl)C(=C3)C(F)(F)F)C=C2.CC4=CC=C(C=C4)[S](O)(=O)=O	5.824	4	3	7
S1042	Sunitinib Malate	1	e7	in 10mM DMSO	FDA,DMF,EMA,HMA,NDC,PMDA	Martindale:The Extra Pharmacopoeia	201275	Cancer	c-Kit,PDGFR,VEGFR	Protein Tyrosine Kinase	Sunitinib Malate is a multi-targeted RTK inhibitor targeting VEGFR2 (Flk-1) and PDGFRβ with IC50 of 80 nM and 2 nM in cell-free assays, and also inhibits c-Kit.	532.56	341031-54-7	15	28.17	<1		http://selleckchem.com/products/Sunitinib-Malate-(Sutent).html	C26H33FN4O7	Malate	N/A	CCN(CC)CCNC(=O)C1=C(C)[NH]C(=C1C)/C=C/2C(=O)NC3=CC=C(F)C=C23.OC(CC(O)=O)C(O)=O	-1.049	4	4	10
S1044	Temsirolimus (CCI-779, NSC 683864)	1	g7	in 10mM DMSO	FDA,DMF,EMA,NDC,PMDA	Martindale:The Extra Pharmacopoeia	203153,207383	Cancer	mTOR	PI3K/Akt/mTOR	Temsirolimus (CCI-779, NSC 683864) is a specific mTOR inhibitor with IC50 of 1.76 μM in a cell-free assay.	1030.29	162635-04-3	67	65.03	<1		http://selleckchem.com/products/Temsirolimus.html	C56H87NO16	free base	N/A	COC1CC(CCC1OC(=O)C(C)(CO)CO)CC(C)C2CC(=O)C(C)\C=C(C)\C(O)C(OC)C(=O)C(C)CC(C)/C=C/C=C/C=C(C)/C(CC3CCC(C)C(O)(O3)C(=O)C(=O)N4CCCCC4C(=O)O2)OC	6.039	12	3	11
S1047	Vorinostat (SAHA, MK0683)	1	i7	in 10mM DMSO	FDA,DMF,NDC,PMDA	Martindale:The Extra Pharmacopoeia	021991	Cancer	Autophagy,HDAC	Epigenetics	Vorinostat (suberoylanilide hydroxamic acid, SAHA) is an HDAC inhibitor with IC50 of ~10 nM in a cell-free assay.	264.3	149647-78-9	52	196.75	<1		http://selleckchem.com/products/Vorinostat-saha.html	C14H20N2O3	free base	SAHA, MK0683, suberoylanilide hydroxamic acid	ONC(=O)CCCCCCC(=O)NC1=CC=CC=C1	2.005	2	2	8
S1053	Entinostat (MS-275)	1	k7	in 10mM DMSO	DMF	N/A	N/A	Cancer	HDAC	Epigenetics	Entinostat (MS-275) strongly inhibits HDAC1 and HDAC3 with IC50 of 0.51 μM and 1.7 μM in cell-free assays, compared with HDACs 4, 6, 8, and 10. Phase 3.	376.41	209783-80-2	75	199.25	<1		http://selleckchem.com/products/MS-275.html	C21H20N4O3	free base	SNDX-275	NC1=CC=CC=C1NC(=O)C2=CC=C(CNC(=O)OCC3=CN=CC=C3)C=C2	2.071	4	3	7
S1055	Enzastaurin (LY317615)	1	m7	in 10mM DMSO	N/A	Martindale:The Extra Pharmacopoeia	N/A	Cancer	PKC	TGF-beta/Smad	Enzastaurin (LY317615) is a potent PKCβ selective inhibitor with IC50 of 6 nM in cell-free assays, 6- to 20-fold selectivity against PKCα, PKCγ and PKCε. Phase 3.	515.61	170364-57-5	30	58.18	<1		http://selleckchem.com/products/Enzastaurin.html	C32H29N5O2	free base	N/A	C[N]1C=C(C2=CC=CC=C12)C3=C(C(=O)NC3=O)C4=C[N](C5CCN(CC5)CC6=NC=CC=C6)C7=CC=CC=C47	4.32	3	1	5
S1060	Olaparib (AZD2281, Ku-0059436)	1	o7	in 10mM DMSO	FDA,DMF,EMA,NDC,PMDA	Martindale:The Extra Pharmacopoeia	206162,208558	Cancer	PARP	DNA Damage	Olaparib (AZD2281, KU0059436) is a selective inhibitor of PARP1/2 with IC50 of 5 nM/1 nM in cell-free assays, 300-times less effective against tankyrase-1.	434.46	763113-22-0	86	197.95			http://selleckchem.com/products/AZD2281(Olaparib).html	C24H23FN4O3	free base	N/A	FC1=C(C=C(CC2=NNC(=O)C3=C2C=CC=C3)C=C1)C(=O)N4CCN(CC4)C(=O)C5CC5	2.127	4	1	4
S1064	Masitinib (AB1010)	1	a9	in 10mM DMSO	DMF,EMA	N/A	N/A	Cancer	c-Kit,PDGFR	Protein Tyrosine Kinase	Masitinib is a novel inhibitor for Kit and PDGFRα/β with IC50 of 200 nM and 540 nM/800 nM, weak inhibition to ABL and c-Fms. Phase 3.	498.64	790299-79-5	100	200.55	<1		http://selleckchem.com/products/Masitinib-(AB1010).html	C28H30N6OS	free base	N/A	CN1CCN(CC1)CC2=CC=C(C=C2)C(=O)NC3=CC(=C(C)C=C3)NC4=NC(=CS4)C5=CC=CN=C5	4.475	3	2	7
S1068	Crizotinib (PF-02341066)	1	c9	in 10mM DMSO	FDA,EMA,NDC,PMDA	N/A	202570	Cancer/Respiratory Disease	ALK,c-Met	Protein Tyrosine Kinase	Crizotinib (PF-02341066) is a potent inhibitor of c-Met and ALK with IC50 of 11 nM and 24 nM in cell-based assays, respectively.	450.34	877399-52-5	9	19.98	<1		http://selleckchem.com/products/PF-2341066.html	C21H22Cl2FN5O	free base	N/A	CC(OC1=C(N)N=CC(=C1)C2=C[N](N=C2)C3CCNCC3)C4=C(Cl)C=CC(=C4Cl)F	3.693	3	2	5
S1082	Vismodegib (GDC-0449)	1	e9	in 10mM DMSO	FDA,EMA,NDC	N/A	203388	Cancer/Respiratory Disease	Hedgehog/Smoothened	Stem Cells & Wnt	Vismodegib (GDC-0449) is a potent, novel and specific hedgehog inhibitor with IC50 of 3 nM and also inhibits P-gp with IC50 of 3.0 μM in a cell-free assay.	421.3	879085-55-9	84	199.38	<1		http://selleckchem.com/products/GDC-0449.html	C19H14Cl2N2O3S	free base	N/A	C[S](=O)(=O)C1=CC=C(C(=C1)Cl)C(=O)NC2=CC(=C(Cl)C=C2)C3=NC=CC=C3	4.265	4	1	4
S1085	Belinostat (PXD101)	1	g9	in 10mM DMSO	FDA,DMF,NDC	N/A	206256	Cancer/Hematology	HDAC	Epigenetics	Belinostat (PXD101) is a novel HDAC inhibitor with IC50 of 27 nM in a cell-free assay, with activity demonstrated in cisplatin-resistant tumors.	318.35	414864-00-9	64	201.04	<1		http://selleckchem.com/products/Belinostat.html	C15H14N2O4S	free base	NSC726630, PX-105684	ONC(=O)/C=C/C1=CC(=CC=C1)[S](=O)(=O)NC2=CC=CC=C2	1.8	3	2	5
S1098	Rucaparib (AG-014699,PF-01367338) phosphate	1	i9	in 10mM DMSO	FDA,EMA,NDC	N/A	209115	Cancer	PARP	DNA Damage	Rucaparib (AG-014699, PF-01367338) is an inhibitor of PARP with Ki of 1.4 nM for PARP1 in a cell-free assay, also showing binding affinity to eight other PARP domains. Phase 3.	421.36	459868-92-9	84	199.35	<1		http://selleckchem.com/products/AG-014699.html	C19H21FN3O5P	Phosphate	N/A	CNCC1=CC=C(C=C1)C2=C3CCNC(=O)C4=CC(=CC(=C34)[NH]2)F.O[P](O)(O)=O	2.49	1	3	3
S1119	Cabozantinib (XL184, BMS-907351)	1	k9	in 10mM DMSO	FDA,DMF,EMA,NDC	N/A	208692,203756	Cancer	c-Met,VEGFR	Protein Tyrosine Kinase	Cabozantinib (XL184, BMS-907351) is a potent VEGFR2 inhibitor with IC50 of 0.035 nM and also inhibits c-Met, Ret, Kit, Flt-1/3/4, Tie2, and AXL with IC50 of 1.3 nM, 4 nM, 4.6 nM, 12 nM/11.3 nM/6 nM, 14.3 nM and 7 nM in cell-free assays, respectively.	501.51	849217-68-1	100	199.4	<1		http://selleckchem.com/products/XL184.html	C28H24FN3O5	Free Base	N/A	COC1=CC2=C(C=C1OC)C(=CC=N2)OC3=CC=C(NC(=O)C4(CC4)C(=O)NC5=CC=C(F)C=C5)C=C3	4.342	6	2	8
S1120	Everolimus (RAD001)	1	m9	in 10mM DMSO	FDA,DMF,EMA,HMA,NDC,PMDA	EP9.7;Martindale:The Extra Pharmacopoeia	206133,207486,207934,210050,210130	Cancer	mTOR	PI3K/Akt/mTOR	Everolimus (RAD001) is an mTOR inhibitor of FKBP12 with IC50 of 1.6-2.4 nM in a cell-free assay.	958.22	159351-69-6	100	104.36	<1		http://selleckchem.com/products/Everolimus(RAD001).html	C53H83NO14	free base	N/A	COC1CC(CCC1OCCO)CC(C)C2CC(=O)C(C)\C=C(C)\C(O)C(OC)C(=O)C(C)CC(C)/C=C/C=C/C=C(C)/C(CC3CCC(C)C(O)(O3)C(=O)C(=O)N4CCCCC4C(=O)O2)OC	6.164	11	2	9
S1137	Malotilate	1	o9	in 10mM DMSO	CFDA,DMF,PMDA	Martindale:The Extra Pharmacopoeia	N/A	Metabolic Disease	Others	Others	Malotilate, diisopropyl 1,3-dithiol-2-ylidenemalonate, is a drug used for the treatment of liver cirrhosis.	288.38	59937-28-9	58	201.12	<1		http://selleckchem.com/products/Malotilate.html	C12H16O4S2	free base	NKK105	CC(C)OC(=O)C(C(=O)OC(C)C)=C1SC=CS1	2.363	4	0	6
S1144	Ivacaftor (VX-770)	1	a11	in 10mM DMSO	FDA,DMF,EMA,NDC	N/A	203188,207925,206038,211358,210491	Respiratory Disease	CFTR	Transmembrane Transporters	Ivacaftor (VX-770) is a selective potentiator of CFTR targeting G551D-CFTR and F508del-CFTR with EC50 of 100 nM and 25 nM in fisher rat thyroid cells, respectively.	392.49	873054-44-5	78	198.73	<1		http://selleckchem.com/products/VX-770.html	C24H28N2O3	free base	N/A	CC(C)(C)C1=CC(=C(NC(=O)C2=CNC3=C(C=CC=C3)C2=O)C=C1O)C(C)(C)C	4.516	2	3	4
S1148	Docetaxel	1	c11	in 10mM DMSO	FDA,DMF,EMA,HMA,CFDA,NDC,PMDA	USP42-NF37;BP2019;EP9.2;JP17;IP2010;Martindale:The Extra Pharmacopoeia	022234,022312,022534,201195,201525,202356,203170,203551,203877,204193,205934,206177,207252,207563,208137,208859,209634,209640,210072,210327,210848	Cancer/Respiratory Disease	Microtubule Associated	Cytoskeletal Signaling	Docetaxel, an analog of paclitaxel, is an inhibitor of depolymerisation of microtubules by binding to stabilized microtubules.	807.88	114977-28-5	100	123.78	<1		http://selleckchem.com/products/Docetaxel(Taxotere).html	C43H53NO14	Free Base	RP56976, NSC 628503	CC(=O)OC12COC1CC(O)C3(C)C2C(OC(=O)C4=CC=CC=C4)C5(O)CC(OC(=O)C(O)C(NC(=O)OC(C)(C)C)C6=CC=CC=C6)C(=C(C(O)C3=O)C5(C)C)C	2.586	10	4	13
S1150	Paclitaxel	1	e11	in 10mM DMSO	FDA,DMF,EMA,HMA,CFDA,NDC,PMDA	USP42-NF37;EP9.7;KP Ⅹ;IP2010;Martindale:The Extra Pharmacopoeia	075184,075190,075278,075297,075436,076131,076233,077413,077574,078167,090130,091540,205720	Cancer/Respiratory Disease	Autophagy,Microtubule Associated	Cytoskeletal Signaling	Paclitaxel is a microtubule polymer stabilizer with IC50 of 0.1 pM in human endothelial cells.	853.91	33069-62-4	171	200.26	<1		http://selleckchem.com/products/Paclitaxel(Taxol).html	C47H51NO14	free base	NSC 125973	CC(=O)OC1C(=O)C2(C)C(O)CC3OCC3(OC(C)=O)C2C(OC(=O)C4=CC=CC=C4)C5(O)CC(OC(=O)C(O)C(NC(=O)C6=CC=CC=C6)C7=CC=CC=C7)C(=C1C5(C)C)C	3.055	11	3	14
S1156	Capecitabine	1	g11	in 10mM DMSO	FDA,DMF,EMA,HMA,CFDA,NDC,PMDA	USP42-NF37;BP2019;EP9.2;IP2010;Martindale:The Extra Pharmacopoeia	090943,091649,200483,202593,204741,207456,207652,209365,210604	Cancer	DNA/RNA Synthesis	DNA Damage	Capecitabine is a tumor-selective fluoropyrimidine carbamate, which achieves higher intratumoral 5-FU level with lower toxicity than 5-FU.	359.35	154361-50-9	72	200.36	6	16.7	http://selleckchem.com/products/Capecitabine(Xeloda).html	C15H22FN3O6	free base	RO 09-1978	CCCCCOC(=O)NC1=NC(=O)N(C=C1F)C2OC(C)C(O)C2O	0.82	5	3	7
S1162	PA-824	1	i11	in 10mM DMSO	FDA,NDC	N/A	212862	Infection	Anti-infection	Microbiology	PA-824 is an anti-tuberculosis drug for tuberculosis with MIC less than 2.8 μM.Phase 2.	359.26	187235-37-6	72	200.41	<1		http://selleckchem.com/products/pa-824.html	C14H12F3N3O5	free base	N/A	[O-][N+](=O)C1=C[N]2CC(COC2=N1)OCC3=CC=C(OC(F)(F)F)C=C3	4.301	4	0	6
S1164	Lenvatinib (E7080)	1	k11	in 10mM DMSO	FDA,DMF,EMA,NDC,PMDA	N/A	206947	Cancer	VEGFR	Protein Tyrosine Kinase	Lenvatinib (E7080) is a multi-target inhibitor, mostly for VEGFR2(KDR)/VEGFR3(Flt-4) with IC50 of 4 nM/5.2 nM, less potent against VEGFR1/Flt-1, ~10-fold more selective for VEGFR2/3 against FGFR1, PDGFRα/β in cell-free assays. Phase 3.	426.85	417716-92-8	40	93.71	<1		http://selleckchem.com/products/E7080.html	C21H19ClN4O4	free base	N/A	COC1=C(C=C2C(=CC=NC2=C1)OC3=CC(=C(NC(=O)NC4CC4)C=C3)Cl)C(N)=O	2.832	5	3	6
S1168	Valproic acid sodium salt (Sodium valproate)	1	m11	in 10mM DMSO	FDA,DMF,NDC,HMA	USP42-NF37;BP2019;EP9.2;Ph.Int_6th;IP2010;Martindale:The Extra Pharmacopoeia	070195,070431,070631,070868,073178,073229,073484,074060,075379,075782,077105,077960,090517,091037	Neurological Disease/Infection/Psychotic disorders	GABA Receptor,HDAC,Autophagy	Neuronal Signaling	Valproic acid sodium salt (Sodium valproate) is a HDAC inhibitor by selectively inducing proteasomal degradation of HDAC2, used in the treatment of epilepsy, bipolar disorder and prevention of migraine headaches.	166.19	1069-66-5	33	198.57	33	198.57	http://selleckchem.com/products/Sodium-valproate.html	C8H15NaO2	Sodium salt	N/A	CCCC(CCC)C(=O)O[Na]	1.275	0	0	5
S1178	Regorafenib (BAY 73-4506)	1	o11	in 10mM DMSO	FDA,DMF,EMA,NDC,PMDA	EP9.8	203085,204369	Cancer	c-RET,VEGFR	Protein Tyrosine Kinase	Regorafenib (BAY 73-4506) is a multi-target inhibitor for VEGFR1, VEGFR2, VEGFR3, PDGFRβ, Kit, RET and Raf-1 with IC50 of 13 nM/4.2 nM/46 nM, 22 nM, 7 nM, 1.5 nM and 2.5 nM in cell-free assays, respectively.	482.82	755037-03-7	97	200.9	<1		http://selleckchem.com/products/BAY-73-4506.html	C21H15ClF4N4O3	free base	Fluoro-Sorafenib	CNC(=O)C1=CC(=CC=N1)OC2=CC(=C(NC(=O)NC3=CC=C(Cl)C(=C3)C(F)(F)F)C=C2)F	4.381	4	3	6
S1183	Danoprevir (ITMN-191)	1	a13	in 10mM DMSO	CFDA	N/A	N/A	Infection/Inflammation	HCV Protease	Proteases	Danoprevir(ITMN-191) is a peptidomimetic inhibitor of the NS3/4A protease of hepatitis C virus (HCV) with IC50 of 0.2-3.5 nM, inhibition effect for HCV genotypes 1A/1B/4/5/6 is ~10-fold higher than 2B/3A. Phase 2.	731.83	850876-88-9	144	196.77	<1		http://selleckchem.com/products/Danoprevir.html	C35H46FN5O9S	free base	RG7227	CC(C)(C)OC(=O)NC1CCCCC\C=C/C2CC2(NC(=O)C3CC(CN3C1=O)OC(=O)N4CC5=C(C4)C(=CC=C5)F)C(=O)N[S](=O)(=O)C6CC6	2.922	9	3	8
S1185	Ritonavir	1	c13	in 10mM DMSO	FDA,DMF,EMA,HMA,CFDA,NDC,PMDA	USP42-NF37;BP2019;EP9.2;Ph.Int_6th;IP2010;Martindale:The Extra Pharmacopoeia	022282,205508,206041,205425,207407,079074,090371,090471,091202,091203,091677,204739,210540,202573,202738,203759,204587,205040,205801,206614,208890	Infection	HIV Protease,P450 (e.g. CYP17)	Proteases	Ritonavir is a Cytochrome P450 3A and Protease Inhibitor Also inhibits Cytochrome P450 2D6, P-Glycoprotein and induces Cytochrome P450 2C19, Cytochrome P450 1A2, Cytochrome P450 2C9, Cytochrome P450 2B6 and UDP Glucuronosyltransferases.	720.94	155213-67-5	100	138.71	<1		http://selleckchem.com/products/Ritonavir.html	C37H48N6O5S2	free base	ABT-538, A 84538	CC(C)C(NC(=O)N(C)CC1=CSC(=N1)C(C)C)C(=O)NC(CC(O)C(CC2=CC=CC=C2)NC(=O)OCC3=CN=CS3)CC4=CC=CC=C4	4.978	6	4	18
S1188	Anastrozole	1	e13	in 10mM DMSO	FDA,DMF,CFDA,NDC,PMDA,HMA	USP42-NF37;EP9.3;BP2019;IP2010;Martindale:The Extra Pharmacopoeia	078058,078322,078485,078921,078944,078984,079007,079220,090088,090568,090732,091051,091164,091177,091242,091331,200654,206037	Cancer	Aromatase	Endocrinology & Hormones	Anastrozole is a third-generation nonsteroidal selective aromatase inhibitor. It may offer greater selectivity compared with other aromatase inhibitors, being without any intrinsic endocrine effects and with no apparent effect on the synthesis of adrenal steroids.	293.37	120511-73-1	59	201.11	<1		http://selleckchem.com/products/Anastrozole.html	C17H19N5	free base	ZD-1033	CC(C)(C#N)C1=CC(=CC(=C1)C[N]2C=NC=N2)C(C)(C)C#N	2.965	2	0	4
S1189	Aprepitant	1	g13	in 10mM DMSO	FDA,DMF,EMA,HMA,NDC,PMDA	USP42-NF37;Martindale:The Extra Pharmacopoeia	090999,207777	Gastroenterology	Substance P	Others	Aprepitant is a potent and selective neurokinin-1 receptor antagonist with IC50 of 0.1 nM.	534.43	170729-80-3	107	200.21	<1		http://selleckchem.com/products/Aprepitant.html	C23H21F7N4O3	free base	MK-0869, L-754030	CC(OC1OCCN(CC2=NNC(=O)N2)C1C3=CC=C(F)C=C3)C4=CC(=CC(=C4)C(F)(F)F)C(F)(F)F	4.635	4	2	8
S1190	Bicalutamide	1	i13	in 10mM DMSO	FDA,DMF,CFDA,NDC,PMDA,HMA	USP42-NF37;BP2019;EP9.2;Martindale:The Extra Pharmacopoeia	076932,077973,077995,078285,078575,078634,078917,079045,079089,079110,079185,091011,200274	Cancer	Androgen Receptor	Endocrinology & Hormones	Bicalutamide is an androgen receptor (AR) antagonist with IC50 of 0.16 μM in LNCaP/AR(cs)cell line.	430.37	90357-06-5	86	199.83	<1		http://selleckchem.com/products/Bicalutamide(Casodex).html	C18H14F4N2O4S	free base	ICI-176334	CC(O)(C[S](=O)(=O)C1=CC=C(F)C=C1)C(=O)NC2=CC=C(C#N)C(=C2)C(F)(F)F	2.926	3	1	6
S1191	Fulvestrant	1	k13	in 10mM DMSO	FDA,DMF,EMA,HMA,NDC,PMDA	USP42-NF37;BP2019;Martindale:The Extra Pharmacopoeia	205935,207754,210044,210326	Cancer	Estrogen/progestogen Receptor	Endocrinology & Hormones	Fulvestrant is an estrogen receptor (ER) antagonist with IC50 of 0.94 nM in a cell-free assay.	606.77	129453-61-8	100	164.81	<1		http://selleckchem.com/products/Fulvestrant.html	C32H47F5O3S	free base	ICI-182780, ZD 9238	CC12CCC3C(C(CCCCCCCCC[S](=O)CCCC(F)(F)C(F)(F)F)CC4=C3C=CC(=C4)O)C1CCC2O	8.437	1	2	15
S1192	Raltitrexed	1	m13	in 10mM DMSO	CFDA	Martindale:The Extra Pharmacopoeia	N/A	Cancer	DNA/RNA Synthesis	DNA Damage	Raltitrexed is a thymidylate synthase inhibitor with an IC50 of 9 nM for the inhibition of L1210 cell growth.	458.49	112887-68-0	91	198.48	<1		http://selleckchem.com/products/Raltitrexed.html	C21H22N4O6S	free base	ZD-1694	CN(CC1=CC2=C(C=C1)N=C(C)NC2=O)C3=CC=C(S3)C(=O)NC(CCC(O)=O)C(O)=O	1.528	5	2	9
S1193	Thalidomide	1	o13	in 10mM DMSO	FDA,DMF,EMA,CFDA,NDC,PMDA	USP42-NF37 ;Martindale:The Extra Pharmacopoeia	020785,021430	Neurological Disease	E3 Ligase ,TNF-alpha	Ubiquitin	Thalidomide was introduced as a sedative drug, immunomodulatory agent and also is investigated for treating symptoms of many cancers. Thalidomide inhibits an E3 ubiquitin ligase, which is a CRBN-DDB1-Cul4A complex.	258.23	50-35-1	51	197.5	<1		http://selleckchem.com/products/Thalidomide.html	C13H10N2O4	free base	N/A	O=C1CCC(N2C(=O)C3=C(C=CC=C3)C2=O)C(=O)N1	0.097	4	1	1
S1196	Exemestane	1	a15	in 10mM DMSO	FDA,DMF,CFDA,NDC,PMDA,HMA	USP42-NF37;BP2019;EP9.2;Martindale:The Extra Pharmacopoeia	077431,200898,202602,203315,206421,209208,210323,211031	Cancer	Aromatase	Endocrinology & Hormones	Exemestane is an aromatase inhibitor, inhibits human placental and rat ovarian aromatase with IC50 of 30 nM and 40 nM, respectively.	296.4	107868-30-4	54	182.19	<1		http://selleckchem.com/products/Exemestane.html	C20H24O2	free base	FCE24304, PNU155971	CC12CCC3C(CC(=C)C4=CC(=O)C=CC34C)C1CCC2=O	3.606	2	0	0
S1197	Finasteride	1	c15	in 10mM DMSO	FDA,DMF,CFDA,NDC,PMDA,HMA	USP42-NF37;BP2019;KP Ⅹ;IP2010;Martindale:The Extra Pharmacopoeia	076340,76436,76437,76511,76905,77251,77335,77578,77914,78161,78341,78371,78900,90060,90061,90121,90507,90508,91643,203687,204304,207750	Endocrinology	5-alpha Reductase	Endocrinology & Hormones	Finasteride is a potent, reversible inhibitor of the rat type 1 5 alpha-reductase with Ki of 10.2 nM, used in the treatment of benign prostatic hyperplasia (BPH) and male pattern baldness (MPB).	372.54	98319-26-7	75	201.32	<1		http://selleckchem.com/products/Finasteride.html	C23H36N2O2	free base	MK-906	CC(C)(C)NC(=O)C1CCC2C3CCC4NC(=O)C=CC4(C)C3CCC12C	3.174	2	2	2
S1199	Cladribine	1	e15	in 10mM DMSO	FDA,DMF,EMA,CFDA,NDC,PMDA	USP42-NF37;BP2019;EP9.2;All compounds are not protected by patents	075405,076571,200510	Cancer/Hematology	DNA/RNA Synthesis	DNA Damage	Cladribine is an adenosine deaminase inhibitor for U266, RPMI8226, and MM1.S cells with IC50 of approximately 2.43 μM, 0.75 μM, and 0.18 μM, respectively.	285.69	4291-63-8	57	199.52	<1		http://selleckchem.com/products/Cladribine.html	C10H12ClN5O3	free base	2-CdA, 2-chlorodeoxyadenosine	NC1=NC(=NC2=C1N=C[N]2C3CC(O)C(CO)O3)Cl	-0.259	4	3	2
S1200	Decitabine	1	g15	in 10mM DMSO	FDA,DMF,EMA,CFDA,NDC	Martindale:The Extra Pharmacopoeia	202969,203131,203475,204607,205582,206033,207100,208601,209056,210756	Cancer/Hematology	DNA Methyltransferase	Epigenetics	Decitabine is a DNA methyltransferase inhibitor, incorporating into DNA and resulting in hypomethylation of DNA and intra-S-phase arrest of DNA replication. It is used to treat myelodysplastic syndrome (MDS).	228.21	2353-33-5	45	197.19	10	43.82	http://selleckchem.com/products/Decitabine.html	C8H12N4O4	free base	Deoxycytidine	NC1=NC(=O)N(C=N1)C2CC(O)C(CO)O2	-1.093	4	3	2
S1202	Dutasteride	1	i15	in 10mM DMSO	FDA,DMF,NDC,PMDA,HMA	USP42-NF37;BP2019;EP9.2;Martindale:The Extra Pharmacopoeia	090095,200899,202204,202421,202530,202660,202808,203118,203241,204262,204292,204373,204376,204705,206373,206574,207935,208227,209909,202509,202975,207769	Endocrinology	5-alpha Reductase	Endocrinology & Hormones	Dutasteride is a dual 5-α reductase inhibitor that inhibits conversion of testosterone to dihydrotestosterone (DHT).	528.53	164656-23-9	62	117.31	<1		http://selleckchem.com/products/Dutasteride.html	C27H30F6N2O2	free base	GI198745, GG-745	CC12CCC3C(CCC4NC(=O)C=CC34C)C1CCC2C(=O)NC5=CC(=CC=C5C(F)(F)F)C(F)(F)F	5.703	2	2	4
S1204	Melatonin	1	k15	in 10mM DMSO	DMF,EMA,HMA,NDC	USP42-NF37;BP2019;Martindale:The Extra Pharmacopoeia	N/A	Psychotic disorders	MT Receptor	GPCR & G Protein	Melatonin is a MT receptor agonist, used as a dietary supplement.	232.28	73-31-4	47	202.34	<1		http://selleckchem.com/products/Melatonin.html	C13H16N2O2	free base	N/A	COC1=CC2=C([NH]C=C2CCNC(C)=O)C=C1	1.555	2	2	4
S1206	Bisoprolol fumarate	1	m15	in 10mM DMSO	FDA,DMF,CFDA,NDC,PMDA,HMA	USP42-NF37;BP2019;KP Ⅹ;EP9.2;JP17;Martindale:The Extra Pharmacopoeia	075474,075643,075644,075831,077910,078635,204891,075469,075527,075579,075632,075642,075672,075686,075768,079106	Cardiovascular Disease	Adrenergic Receptor	Neuronal Signaling	Bisoprolol fumarate is a selective type β1 adrenergic receptor blocker.	441.52	104344-23-2	88	199.31	88	199.31	http://selleckchem.com/products/Bisoprolol-Fumarate.html	C22H35NO8	fumarate	EMD33512	CC(C)NCC(O)COC1=CC=C(COCCOC(C)C)C=C1.OC(=O)\C=C\C(O)=O	-0.635	5	2	14
S1207	Tivozanib (AV-951)	1	o15	in 10mM DMSO	EMA	N/A	N/A	Cancer	c-Kit,PDGFR,VEGFR	Protein Tyrosine Kinase	Tivozanib (AV-951) is a potent and selective VEGFR inhibitor for VEGFR1/2/3 with IC50 of 30 nM/6.5 nM/15 nM, and also inhibits PDGFR and c-Kit, low activity observed against FGFR-1, Flt3, c-Met, EGFR and IGF-1R. Phase 3.	454.86	475108-18-0	20	43.97	<1		http://selleckchem.com/products/AV-951.html	C22H19ClN4O5	free base	KRN-951	COC1=CC2=C(C=C1OC)C(=CC=N2)OC3=CC=C(NC(=O)NC4=NOC(=C4)C)C(=C3)Cl	4.039	7	2	6
S1208	Doxorubicin (Adriamycin) HCl	1	a17	in 10mM DMSO	FDA,DMF,EMA,HMA,CFDA,NDC,PMDA	USP42-NF37;BP2019;KP Ⅹ;Ph.Int_6th;JP17;IP2010;Martindale:The Extra Pharmacopoeia	050467,050629,062921,062975,063097,063277,063336,064097,064140,065515,091418,091495,200146,200170,200901,203622,206062,208888,209825,203263,208657	Cancer	Topoisomerase	DNA Damage	Doxorubicin (Adriamycin) HCl is an antibiotic agent that inhibits DNA topoisomerase II and induces DNA damage and apoptosis in tumor cells.	579.98	25316-40-9	100	172.42	20	34.48	http://selleckchem.com/products/Adriamycin.html	C27H30ClNO11	Hydrochloride	NSC 123127	Cl.COC1=C2C(=O)C3=C(C(=C4CC(O)(CC(OC5CC(N)C(O)C(C)O5)C4=C3O)C(=O)CO)O)C(=O)C2=CC=C1	0.338	6	5	5
S1209	Fluorouracil (5-Fluoracil, 5-FU)	1	c17	in 10mM DMSO	FDA,DMF,CFDA,NDC,PMDA,HMA	USP42-NF37;EP9.2;BP2019;KP Ⅹ;Ph.Int_6th;JP16;IP2010;Martindale:The Extra Pharmacopoeia	012209,040278,040279,040291,040333,040334,040379,040743,040772,040798,076526,077524,087791,087792,088766,088767,088929,089152,089368,089428,089434,089455,089508,089519,090368,091299,202668,202669,203122,203608,203609,210123,210124	Cancer	DNA/RNA Synthesis	DNA Damage	Fluorouracil (5-Fluoracil, 5-FU) is a DNA/RNA synthesis inhibitor, which interrupts nucleotide synthetic by inhibiting thymidylate synthase (TS) in tumor cells.	130.08	51-21-8	26	199.88	<1		http://selleckchem.com/products/Adrucil(Fluorouracil).html	C4H3FN2O2	free base	NSC 19893	FC1=CNC(=O)NC1=O	-1.102	2	2	0
S1210	Methotrexate	1	e17	in 10mM DMSO	FDA,DMF,EMA,HMA,CFDA,NDC,PMDA	USP42-NF37;BP2019;KP Ⅹ;EP9.2;Ph.Int_6th;JP17;IP2010;Martindale:The Extra Pharmacopoeia	008085,011719,020079,040054,040233,040263,081099,081235,088648,088935,088936,088937,089158,089263,089293,089294,089295,089296,089308,089309,089322,089323,089341,089342,201749,207812,210040	Cancer/Hematology/Immunology/Inflammation	DHFR	Metabolism	Methotrexate (MTX), analog of folic acid, is a nonspecific inhibitor of the dihydrofolate reductase(DHFR) of bacteria and cancerous cells as well as normal cells. It forms an inactive ternary complex with DHFR and NADPH.	454.44	59-05-2	90	198.05	<1		http://selleckchem.com/products/Abitrexate.html	C20H22N8O5	free base	NCI-C04671	CN(CC1=NC2=C(N)N=C(N)N=C2N=C1)C3=CC=C(C=C3)C(=O)NC(CCC(O)=O)C(O)=O	0.114	7	3	9
S1212	Bendamustine HCl	1	g17	in 10mM DMSO	FDA,DMF,NDC,PMDA,HMA	USP42-NF37;Martindale:The Extra Pharmacopoeia	211530,204086,204104,204230,204771,205447,205476,205574,205752,205757,207149,209814,210410,210601	Cancer/Hematology	DNA/RNA Synthesis	DNA Damage	Bendamustine HCL is a DNA-damaging agent with IC50 of 50 μM in cell-free assay.	394.72	3543-75-7	78	197.61	2	5.07	http://selleckchem.com/products/Bendamustine-Hydrochloride.html	C16H22Cl3N3O2	Hydrochloride	SDX-105 (Cytostasane) HCl	Cl.C[N]1C(=NC2=CC(=CC=C12)N(CCCl)CCCl)CCCC(O)=O	3.988	2	0	9
S1213	Nelarabine	1	i17	in 10mM DMSO	FDA,DMF,EMA,NDC,PMDA	Martindale:The Extra Pharmacopoeia	021877	Cancer/Hematology	DNA/RNA Synthesis	DNA Damage	Nelarabine is a purine nucleoside analog and DNA synthesis inhibitor with IC50 from 0.067-2.15 μM in tumor cells.	297.27	121032-29-9	60	201.84	3	10.09	http://selleckchem.com/products/Arranon.html	C11H15N5O5	free base	506U78	COC1=NC(=NC2=C1N=C[N]2C3OC(CO)C(O)C3O)N	-1.376	5	4	3
S1214	Bleomycin sulfate	1	k17	in 10mM DMSO	FDA,DMF,NDC,PMDA,HMA	Martindale:The Extra Pharmacopoeia,USP42-NF37,KP Ⅹ,EP9.1,Ph.Int_6th,BP2017,JP17	064084,065031,065033,065042,065185,065201,205030,209439	Cancer	DNA/RNA Synthesis		Bleomycin Sulfate is a glycopeptide antibiotic and an anticancer agent for squamous cell carcinomas (SCC) with IC50 of 4 nM in UT-SCC-19A cells.	1512.62	9041-93-4	100	66			http://www.selleckchem.com/products/Bleomycin-sulfate.html	C55H85N17O25S4	Sulfate	Blenoxane	CC(O)C(NC(=O)C(C)C(O)C(C)NC(=O)C(NC(=O)C1=C(C)C(=NC(=N1)C(CC(N)=O)NCC(N)C(N)=O)N)C(OC2OC(CO)C(O)C(O)C2OC3OC(CO)C(O)C(OC(N)=O)C3O)C4=C[NH]C=N4)C(=O)NCCC5=NC(=CS5)C6=NC(=CS6)C(=O)NCCC[S+](C)C.O[S]([O-])(=O)=O
S1218	Clofarabine	1	m17	in 10mM DMSO	FDA,DMF,EMA,HMA,NDC,PMDA	Martindale:The Extra Pharmacopoeia	204029,205375,207831,208167,208857,208860,209775,210270,210283,212034	Cancer/Hematology	DNA/RNA Synthesis	DNA Damage	Clofarabine inhibits the enzymatic activities of ribonucleotide reductase (IC50 = 65 nM) and DNA polymerase.	303.68	123318-82-1	60	197.58	<1		http://selleckchem.com/products/Clofarabine.html	C10H11ClFN5O3	free base	N/A	NC1=C2N=C[N](C3OC(CO)C(O)C3F)C2=NC(=N1)Cl	-0.085	4	3	2
S1221	Dacarbazine	1	o17	in 10mM DMSO	FDA,DMF,NDC,PMDA,HMA	Martindale:The Extra Pharmacopoeia,USP42-NF37,EP9.2,Ph.Int_6th,BP2017	070821,070822,070962,070990,071563,075259,075371,075812,075940	Cancer	DNA/RNA Synthesis	DNA Damage	Dacarbazine is a triazene derivative with antineoplastic activity. Dacarbazine alkylates and cross-links DNA during all phases of the cell cycle, resulting in disruption of DNA function, cell cycle arrest, and apoptosis used in the treatment of various cancers.	182.18	4342-03-4	12	65.87	2	10.98	http://selleckchem.com/products/Dacarbazine.html	C6H10N6O	free base	DTIC-Dome	CN(C)N=NC1=C(N=C[NH]1)C(N)=O	-0.344	4	2	3
S1222	Dexrazoxane HCl (ICRF-187, ADR-529)	1	a19	in 10mM DMSO	FDA,DMF,EMA,HMA,CFDA,NDC,PMDA	Martindale:The Extra Pharmacopoeia	076068,200752,207321	Cardiovascular Disease	Topoisomerase	DNA Damage	Dexrazoxane HCl (ICRF-187, ADR-529) is an intracellular iron chelator, which decreases the formation of superoxide radicals, used as a cardioprotective agent also an inhibitor of topoisomerase II	304.73	149003-01-0	60	196.9	60	196.9	http://selleckchem.com/products/Dexrazoxane-Hydrochloride.html	C11H17ClN4O4	Hydrochloride	ICRF-187 (ADR-529) HCl	Cl.CC(CN1CC(=O)NC(=O)C1)N2CC(=O)NC(=O)C2	-1.722	4	2	3
S1223	Epirubicin HCl	1	c19	in 10mM DMSO	FDA,DMF,CFDA,NDC,PMDA,HMA	USP42-NF37;BP2019;Martindale:The Extra Pharmacopoeia	050807,065289,065331,065339,065343,065361,065371,065408,065411,065445,090075,090163,090266,091599	Cancer	Topoisomerase	DNA Damage	Epirubicin HCl, a semisynthetic L-arabino derivative of doxorubicin, is an antineoplastic agent by inhibiting Topoisomerase.	579.98	56390-09-1	100	172.42	100	172.42	http://selleckchem.com/products/Ellence.html	C27H30ClNO11	Hydrochloride	4'-epidoxorubicin HCl	Cl.COC1=C2C(=O)C3=C(C(=C4CC(O)(CC(OC5CC(N)C(O)C(C)O5)C4=C3O)C(=O)CO)O)C(=O)C2=CC=C1	0.338	6	5	5
S1225	Etoposide	1	e19	in 10mM DMSO	FDA,DMF,CFDA,NDC,PMDA,HMA	USP42-NF37;EP9.2;BP2019;KP Ⅹ;Ph.Int_6th;JP17;IP2010;Martindale:The Extra Pharmacopoeia	074227,074228,074284,074290,074320,074351,074510,074513,074529,074813,074968,074983,075635,203507,204927	Cancer	Topoisomerase	DNA Damage	Etoposide is a semisynthetic derivative of podophyllotoxin, which inhibits DNA synthesis via topoisomerase II inhibition activity.	588.56	33419-42-0	100	169.91	<1		http://selleckchem.com/products/Etopophos.html	C29H32O13	free base	VP-16, VP-16213	COC1=CC(=CC(=C1O)OC)C2C3C(COC3=O)C(OC4OC5COC(C)OC5C(O)C4O)C6=C2C=C7OCOC7=C6	0.935	10	3	5
S1227	Raloxifene HCl	1	g19	in 10mM DMSO	FDA,DMF,EMA,HMA,CFDA,NDC,PMDA	USP42-NF37;BP2019;EP9.2;Martindale:The Extra Pharmacopoeia	078193,090842,200825,204310,204491,206384,208206	Cancer/Metabolic Disease	Estrogen/progestogen Receptor	Endocrinology & Hormones	Raloxifene is an estrogen antagonist, which inhibits human cytosolic aldehyde oxidase-catalyzed phthalazine oxidation activity with IC50 of 5.7 nM.	510.04	82640-04-8	100	196.06	<1		http://selleckchem.com/products/Evista.html	C28H28ClNO4S	Hydrochloride	LY156758 (Keoxifene) HCl	Cl.OC1=CC=C(C=C1)C2=C(C(=O)C3=CC=C(OCCN4CCCCC4)C=C3)C5=C(S2)C=C(O)C=C5	6.843	2	2	7
S1229	Fludarabine Phosphate	1	i19	in 10mM DMSO	FDA,DMF,CFDA,NDC,PMDA,HMA	USP42-NF37;BP2019;EP9.2;Martindale:The Extra Pharmacopoeia	022137,076349,076661,077790,078393,078544,078610,090724,200647,200648,203738	Cancer/Hematology	DNA/RNA Synthesis	DNA Damage	Fludarabine Phosphate is an analogue of adenosine and deoxyadenosine, which is able to compete with dATP for incorporation into DNA and inhibit DNA synthesis.	365.21	75607-67-9	73	199.88	2	5.48	http://selleckchem.com/products/Fludara.html	C10H13FN5O7P	Phosphate	F-ara-A (NSC 312887) Phosphate	NC1=NC(=NC2=C1N=C[N]2C3OC(CO[P](O)(O)=O)C(O)C3O)F	-1.384	5	3	4
S1231	Topotecan HCl	1	k19	in 10mM DMSO	FDA,DMF,EMA,HMA,CFDA,NDC	EP;USP;IP2010;Martindale:The Extra Pharmacopoeia	200199,022453,090620,091089,091199,091284,091376,091542,200582,201166,201191,202203,202351,204406,206074,206962	Cancer/Respiratory Disease	Topoisomerase	DNA Damage	Topotecan HCl is a topoisomerase I inhibitor for MCF-7 Luc cells and DU-145 Luc cells with IC50 of 13 nM and 2 nM in cell-free assays, respectively.	457.91	119413-54-6	91	198.73	91	198.73	http://selleckchem.com/products/Topotecan-Hydrochloride.html	C23H24ClN3O5	Hydrochloride	NSC609699, Nogitecan HCl, SKFS 104864A	Cl.CCC1(O)C(=O)OCC2=C1C=C3N(CC4=C3N=C5C=CC(=C(CN(C)C)C5=C4)O)C2=O	1.959	4	1	3
S1233	2-Methoxyestradiol (2-MeOE2)	1	m19	in 10mM DMSO	DMF	N/A	N/A	Angiology/Cancer/Cardiovascular Disease	HIF	Angiogenesis	2-Methoxyestradiol (2-MeOE2) depolymerizes microtubules and blocks HIF-1α nuclear accumulation and HIF-transcriptional activity. Phase 2.	302.41	362-07-2	60	198.41	<1		http://selleckchem.com/products/2-Methoxyestradiol(2ME2).html	C19H26O3	free base	NSC 659853	COC1=C(O)C=C2CCC3C(CCC4(C)C(O)CCC34)C2=C1	3.821	1	2	1
S1235	Letrozole	1	o19	in 10mM DMSO	FDA,DMF,CFDA,NDC,PMDA,HMA	USP42-NF37;KP Ⅹ;BP2019;EP9.2;Martindale:The Extra Pharmacopoeia	078190,090196,090289,090292,090405,090491,090789,090838,090934,091098,091191,091303,091466,091638,200161,201804,202048,202716,203796,205869,211717	Cancer	Aromatase	Endocrinology & Hormones	Letrozole is a third generation inhibitor of aromatase with IC50 of 0.07-20 nM in cell-free assays.It has no effect on the plasma levels of 17α-OH progesterone, thyroid-stimulating hormone (TSH), luteinizing hormone (LH), follicle-stimulating hormone (FSH), or androstenedione and does not affect normal urine electrolyte excretion or thyroid function in clinical studies.	285.3	112809-51-5	57	199.79	<1		http://selleckchem.com/products/Letrozole.html	C17H11N5	free base	CGS 20267	N#CC1=CC=C(C=C1)C([N]2C=NC=N2)C3=CC=C(C=C3)C#N	2.749	2	0	3
S1237	Temozolomide	1	a21	in 10mM DMSO	FDA,DMF,EMA,HMA,CFDA,NDC,PMDA	USP42-NF37 ;EP9.4;BP2019;IP2010;Martindale:The Extra Pharmacopoeia	078879,201528,201742,203490,203691,203898,203959,204159,204639,205227,206309,206413,206750,207658	Cancer	DNA/RNA Synthesis,Autophagy	DNA Damage	Temozolomide is a monofunctional SN-1 alkylating agent that can modify nitrogen atoms in the DNA ring and the extracyclic oxygen group, chemically converted to MTIC and degrades to methyldiazonium cation, which transfers methyl groups to DNA at physiologic pH. A DNA damage inducer in L-1210 and L-1210/BCNU cells.	194.15	85622-93-1	38	195.72	<1		http://selleckchem.com/products/Methazolastone.html	C6H6N6O2	free base	CCRG81045, NSC 362856	CN1N=NC2=C(N=C[N]2C1=O)C(N)=O	0.052	5	1	1
S1238	Tamoxifen	1	c21	in 10mM DMSO	FDA,DMF,CFDA,NDC,PMDA,HMA	USP42-NF37;BP2019;KP Ⅹ;EP9.2;Ph.Int_6th;JP17;IP2010;Martindale:The Extra Pharmacopoeia	070929,074504,074539,074732,075740,075797,076027,076179,076398,090878,206694	Cancer	Estrogen/progestogen Receptor,Autophagy	Angiogenesis	Tamoxifen is an antagonist of the estrogen receptor in breast tissue.	371.51	10540-29-1	74	199.19	<1		http://selleckchem.com/products/Nolvadex.html	C32H37NO8	Free Base	ICI 46474	CC/C(C1=CC=CC=C1)=C(C2=CC=CC=C2)/C3=CC=C(OCCN(C)C)C=C3.OC(=O)CC(O)(CC(O)=O)C(O)=O	1.966	4	0	13
S1241	Vincristine sulfate	1	e21	in 10mM DMSO	FDA,DMF,CFDA,NDC,PMDA,HMA	USP42-NF37;BP2019;KP Ⅹ;EP9.2;Ph.Int_6th;JP17;Martindale:The Extra Pharmacopoeia	070411,070777,070778,070873,071222,071223,071559,071560,071561,071937,076296,076401	Cancer/Hematology/Respiratory Disease	Autophagy,Microtubule Associated	Cytoskeletal Signaling	Vincristine sulfate is an inhibitor of polymerization of microtubules by binding to tubulin with IC50 of 32 μM in a cell-free assay.	923.04	2068-78-2	100	108.34	60	65	http://selleckchem.com/products/Vincristine-Sulfate.html	C46H58N4O14S	free base	Leurocristine	CCC1(O)CC2CN(CCC3=C([NH]C4=C3C=CC=C4)C(C2)(C(=O)OC)C5=CC6=C(C=C5OC)N(C=O)C7C(O)(C(OC(C)=O)C8(CC)C=CCN9CCC67C89)C(=O)OC)C1.O[S](O)(=O)=O	3.365	8	1	10
S1243	Agomelatine	1	g21	in 10mM DMSO	DMF,EMA,HMA,CFDA	Martindale:The Extra Pharmacopoeia	N/A	Neurological Disease	5-HT Receptor	Neuronal Signaling	Agomelatine is classified as a norepinephrine-dopamine disinhibitor (NDDI) due to its antagonism of the 5-HT2C receptor.	243.3	138112-76-2	48	197.29	<1		http://selleckchem.com/products/Agomelatine.html	C15H17NO2	free base	S20098	COC1=CC2=C(CCNC(C)=O)C=CC=C2C=C1	2.17	2	1	4
S1245	Latrepirdine 2HCl	1	i21	in 10mM DMSO	N/A	Martindale the Extra Pharmacopoei	N/A	Others	5-HT Receptor,GluR,Histamine Receptor	Neuronal Signaling	Latrepirdine is an orally active,and neuroactive antagonist of multiple drug targets, including histamine receptors, GluR, and 5-HT receptors, used as an antihistamine drug.	392.37	97657-92-6	24	61.17	<1		http://selleckchem.com/products/Dimebon.html	C21H27Cl2N3	Dihydrochloride	N/A	Cl.Cl.CN1CCC2=C(C1)C3=C(C=CC(=C3)C)[N]2CCC4=CC=C(C)N=C4	4.769	1	0	3
S1247	Leflunomide	1	k21	in 10mM DMSO	FDA,DMF,EMA,HMA,CFDA,NDC,PMDA	USP42-NF37;BP2019;EP9.2;Martindale:The Extra Pharmacopoeia	077083,077084,077085,077086,077087,077090,091369,212308	Inflammation	Dehydrogenase	Metabolism	Leflunomide is a pyrimidine synthesis inhibitor belonging to the DMARD, used as an immunosuppressant agent.	270.21	75706-12-6	54	199.84	<1		http://selleckchem.com/products/Leflunomide.html	C12H9F3N2O2	free base	HWA486	CC1=C(C=NO1)C(=O)NC2=CC=C(C=C2)C(F)(F)F	2.156	3	1	3
S1250	Enzalutamide (MDV3100)	1	m21	in 10mM DMSO	FDA,DMF,EMA,NDC,PMDA	N/A	203415	Cancer	Androgen Receptor	Endocrinology & Hormones	Enzalutamide (MDV3100) is an androgen-receptor (AR) antagonist with IC50 of 36 nM in LNCaP cells.	464.44	915087-33-1	92	198.09	<1		http://selleckchem.com/products/MDV3100.html	C21H16F4N4O2S	free base	N/A	CNC(=O)C1=C(F)C=C(C=C1)N2C(=S)N(C(=O)C2(C)C)C3=CC=C(C#N)C(=C3)C(F)(F)F	4.954	2	1	4
S1251	Dienogest	1	o21	in 10mM DMSO	FDA,DMF,NDC,PMDA,HMA	BP2019;EP9.2;Martindale:The Extra Pharmacopoeia	202349,202999	Endocrinology	Estrogen/progestogen Receptor	Endocrinology & Hormones	Dienogest is an orally active synthetic progesterone, used for contraception and the treatment of endometriosis.	311.42	65928-58-7	62	199.09	<1		http://selleckchem.com/products/Dienogest.html	C20H25NO2	free base	STS 557	CC12CCC3=C4CCC(=O)C=C4CCC3C1CCC2(O)CC#N	3.046	1	0	1
S1252	Entecavir Hydrate	1	b3	in 10mM DMSO	FDA,DMF,EMA,HMA,CFDA,NDC,PMDA	USP42-NF37;EP9.7;BP2019;Martindale:The Extra Pharmacopoeia	202122,205740,205824,206217,206226,206294,206652,206672,206745,206872,208721,208782	Infection/Inflammation	Reverse Transcriptase	Microbiology	Entecavir, a new deoxyguanine nucleoside analogue, is a selective inhibitor of the replication of the hepatitis B virus (HBV).	295.29	209216-23-9	59	199.8	<1		http://selleckchem.com/products/Entecavir.html	C12H17N5O4	Hydrate	N/A	O.NC1=NC(=O)C2=C(N1)[N](C=N2)C3CC(O)C(CO)C3=C	-1.611	3	4	2
S1255	Nepafenac	1	d3	in 10mM DMSO	FDA,DMF,EMA,NDC,PMDA	Martindale:The Extra Pharmacopoeia	203491,021862	Inflammation	COX	Neuronal Signaling	Nepafenac is a prodrug of amfenac that acts as an inhibitor of COX-1 and COX-2 activity, used in the treatment of pain and inflammation associated with cataract surgery.	254.28	78281-72-8	50	196.63	<1		http://selleckchem.com/products/Nepafenac.html	C15H14N2O2	free base	AHR 9434, AL 6515	NC(=O)CC1=CC=CC(=C1N)C(=O)C2=CC=CC=C2	1.524	2	2	4
S1256	Rufinamide	1	f3	in 10mM DMSO	FDA,DMF,EMA,NDC,PMDA	USP42-NF37;Martindale:The Extra Pharmacopoeia	204988,205075,205095,207363,211388	Neurological Disease	Sodium Channel	Transmembrane Transporters	Rufinamide is a voltage-gated sodium channel blocker, used an anticonvulsant medication.	238.19	106308-44-5	18	75.57	<1		http://selleckchem.com/products/Rufinamide.html	C10H8F2N4O	free base	CGP 33101	NC(=O)C1=C[N](CC2=C(F)C=CC=C2F)N=N1	1.437	3	1	3
S1257	Posaconazole	1	h3	in 10mM DMSO	FDA,DMF,EMA,HMA,NDC	Martindale:The Extra Pharmacopoeia	208768,209983,211500	Infection	P450 (e.g. CYP17)	Metabolism	Posaconazole is an inhibitor primarily of CYP3A4, but it does not inhibit the activity of other CYP enzymes Also an inhibitor of sterol C14ɑ demethylase inhibitor with IC50 of 0.25 μM. Posaconazole has a median terminal elimination half-life of 15-35 hours.	700.78	171228-49-2	100	142.7	<1		http://selleckchem.com/products/Posaconazole.html	C37H42F2N8O4	free base	SCH56592	CCC(C(C)O)N1N=CN(C1=O)C2=CC=C(C=C2)N3CCN(CC3)C4=CC=C(OCC5COC(C5)(C[N]6C=NC=N6)C7=CC=C(F)C=C7F)C=C4	5.096	6	1	12
S1258	Prasugrel	1	j3	in 10mM DMSO	FDA,DMF,EMA,HMA,NDC,PMDA	USP42-NF37;Martindale:The Extra Pharmacopoeia	205790,205888,205897,205913,205927,205987,206021	Cardiovascular Disease	P2 Receptor	Neuronal Signaling	Prasugrel is a thienopyridine ADP receptor (P2Y12) antagonist, used for the reduction of thrombotic cardiovascular events.	373.44	150322-43-3	30	80.33	<1		http://selleckchem.com/products/Prasugrel.html	C20H20FNO3S	Free Base	CS-747, LY640315	CC(=O)OC1=CC2=C(CCN(C2)C(C(=O)C3CC3)C4=CC=CC=C4F)S1	3.801	3	0	6
S1259	Ramelteon	1	l3	in 10mM DMSO	FDA,DMF,NDC,PMDA	Martindale:The Extra Pharmacopoeia	091610,091693	Neurological Disease	MT Receptor	GPCR & G Protein	Ramelteon is a novel melatonin receptor agonist for human MT1 and MT2 receptors and chick forebrain melatonin receptors with Ki of 14 pM, 112 pM and 23.1 pM, respectively.	259.34	196597-26-9	52	200.51	<1		http://selleckchem.com/products/Ramelteon.html	C16H21NO2	free base	TAK-375	CCC(=O)NCCC1CCC2=CC=C3OCCC3=C12	2.826	2	1	4
S1260	Cinacalcet HCl	1	n3	in 10mM DMSO	FDA,DMF,EMA,HMA,CFDA,NDC,PMDA	USP;Martindale:The Extra Pharmacopoeia	090476,090539,203422,204377,206125,207008,208915,208971,209226,210207,210570	Endocrinology	CaSR	GPCR & G Protein	Cinacalcet HCl represents a new class of compounds for the treatment of hyperparathyroidism.	393.87	364782-34-3	79	200.57	<1		http://selleckchem.com/products/Cinacalcet-hydrochloride.html	C22H23ClF3N	Hydrochloride	AMG-073 HCl	Cl.CC(NCCCC1=CC(=CC=C1)C(F)(F)F)C2=CC=CC3=C2C=CC=C3	6.338	0	1	7
S1261	Celecoxib	1	p3	in 10mM DMSO	FDA,DMF,EMA,HMA,CFDA,NDC,PMDA	USP42-NF37;BP2019;EP9.2;Martindale:The Extra Pharmacopoeia	076898,078857,200562,202240,204197,204519,204590,204776,206827,207061,207446,207677,208833,210071	Inflammation	COX	Neuronal Signaling	Celecoxib is a selective COX-2 inhibitor with IC50 of 40 nM in Sf9 cells.	381.37	169590-42-5	76	199.28	<1		http://selleckchem.com/products/Celecoxib.html	C17H14F3N3O2S	free base	SC 58635	CC1=CC=C(C=C1)C2=CC(=N[N]2C3=CC=C(C=C3)[S](N)(=O)=O)C(F)(F)F	4.428	3	1	4
S1267	Vemurafenib (PLX4032, RG7204)	1	b5	in 10mM DMSO	FDA,EMA,NDC,PMDA	N/A	202429	Cancer	Raf	MAPK	Vemurafenib (PLX4032, RG7204) is a novel and potent inhibitor of B-RafV600E with IC50 of 31 nM in cell-free assay. 10-fold selective for B-RafV600E over wild-type B-Raf in enzymatic assays and the cellular selectivity can exceed 100-fold.	489.92	918504-65-1	97	197.99	<1		http://selleckchem.com/products/PLX-4032.html	C23H18ClF2N3O3S	free base	RO5185426	CCC[S](=O)(=O)NC1=CC=C(F)C(=C1F)C(=O)C2=C[NH]C3=NC=C(C=C23)C4=CC=C(Cl)C=C4	4.953	4	2	7
S1271	Acarbose	1	d5	in 10mM DMSO	FDA,DMF,CFDA,NDC,PMDA,HMA	USP42-NF37;BP2019;KP Ⅹ;EP9.2;IP2010;Martindale:The Extra Pharmacopoeia	077532,078441,078470,090912,091053,091343,202271	Endocrinology/Metabolic Disease	Others	Others	Acarbose is an inhibitor of intestinal alpha-glucosidase, used to treat type 2 diabetes mellitus.	645.6	56180-94-0	100	154.89	100	154.89	http://selleckchem.com/products/Acarbose.html	C25H43NO18	free base	BAY g 5421	CC1OC(OC2C(O)C(O)C(OC2CO)OC3C(O)C(O)C(O)OC3CO)C(O)C(O)C1NC4C=C(CO)C(O)C(O)C4O	-6.839	5	13	9
S1276	Adapalene	1	f5	in 10mM DMSO	FDA,DMF,CFDA,NDC,PMDA,HMA	USP42-NF37;BP2019;EP9.2;Martindale:The Extra Pharmacopoeia	090824,090962,091314,200298,201000,203981,204593,208322,203790,205033,206164,206959,208108,209148,209641	Inflammation	Retinoid Receptor	Metabolism	Adapalene is a dual RAR and RXR agonist, used in the treatment of acne.	412.52	106685-40-9	8	19.39	<1		http://selleckchem.com/products/Adapalene.html	C28H28O3	free base	CD-271	COC1=C(C=C(C=C1)C2=CC3=C(C=C2)C=C(C=C3)C(O)=O)[C]45CC6[CH2][CH](C[CH]([CH2]6)C4)C5	6.279	2	0	4
S1278	Altretamine	1	h5	in 10mM DMSO	FDA,DMF,CFDA,NDC	USP42-NF37;Martindale:The Extra Pharmacopoeia	019926	Cancer	DNA alkylator	DNA Damage	Altretamine is an anti-neoplastic agent.	210.28	645-05-6	15	71.33	<1		http://selleckchem.com/products/Altretamine.html	C9H18N6	free base	Hexamethylmelamine, NSC13875, ENT50852	CN(C)C1=NC(=NC(=N1)N(C)C)N(C)C	1.995	3	0	3
S1280	Amisulpride	1	j5	in 10mM DMSO	DMF,CFDA,HMA	BP2019;EP9.6;Martindale:The Extra Pharmacopoeia	N/A	Neurological Disease	Dopamine Receptor	Neuronal Signaling	Amisulpride is an atypical antipsychotic used to treat psychosis in schizophrenia and episodes of mania in bipolar disorder.	369.48	71675-85-9	73	197.57	<1		http://selleckchem.com/products/Amisulpride.html	C17H27N3O4S	free base	DAN-2163	CCN1CCCC1CNC(=O)C2=CC(=C(N)C=C2OC)[S](=O)(=O)CC	1.127	4	2	7
S1281	Aniracetam	1	l5	in 10mM DMSO	CFDA	Martindale:The Extra Pharmacopoeia	N/A	Neurological Disease	AMPA Receptor-kainate Receptor-NMDA Receptor	Neuronal Signaling	Aniracetam is a nootropics and neuroprotective drug.	219.24	72432-10-1	44	200.69	<1		http://selleckchem.com/products/Aniracetam.html	C12H13NO3	free base	RO 13-5057	COC1=CC=C(C=C1)C(=O)N2CCCC2=O	1.267	3	0	2
S1282	Artemisinin	1	n5	in 10mM DMSO	CFDA	Ph.Int_6th;IP2010;Martindale:The Extra Pharmacopoeia	N/A	Infection/Parasitology	Anti-infection	Microbiology	Artemisinin is a sesquiterpene endoperoxide which is a potent antimalarial agent.	282.33	63968-64-9	57	201.89	<1		http://selleckchem.com/products/Artemisinin.html	C15H22O5	free base	Qinghaosu,Artemisinine	CC1CCC2C(C)C(=O)OC3OC4(C)CCC1C23OO4	1.998	5	0	0
S1283	Asenapine maleate	1	p5	in 10mM DMSO	FDA,DMF,EMA,NDC,PMDA	N/A	206107,022117	Neurological Disease	5-HT Receptor,Adrenergic Receptor	Neuronal Signaling	Asenapine maleate is a high-affinity antagonist of serotonin, norepinephrine, dopamine and histamine receptors, used for the treatment of schizophrenia and acute mania associated with?bipolar disorder.	401.84	85650-56-2	80	199.08	<1		http://selleckchem.com/products/Asenapine.html	C21H20ClNO5	Maleate	Org 5222	CN1CC2C(C1)C3=C(OC4=C2C=CC=C4)C=CC(=C3)Cl.OC(=O)\C=C/C(O)=O	0.883	3	0	2
S1284	Benazepril HCl	1	b7	in 10mM DMSO	FDA,DMF,CFDA,NDC,PMDA,HMA	USP42-NF37;BP2019;EP9.2;Martindale:The Extra Pharmacopoeia	077179,077183,077215,077375,077890,078381,078466,079047,090149,090364,091431,202239,078466,078652,021714,076118,076211,076267,076333,076344,076402,076430,076476,076820,077128,078212,078848,076342,076348,076612,076631,076688,077483,078794	Cardiovascular Disease/Endocrinology/Metabolic Disease	RAAS	Endocrinology & Hormones	Benazepril HCl is a novel angiotensin I converting enzyme inhibitor, used primarily in treatment of hypertension.	460.95	86541-74-4	92	199.59	19	41.22	http://selleckchem.com/products/Benazepril-hydrochloride.html	C24H29ClN2O5	Hydrochloride	CGS 14824A HCl	Cl.CCOC(=O)C(CCC1=CC=CC=C1)NC2CCC3=C(C=CC=C3)N(CC(O)=O)C2=O	1.003	4	1	10
S1286	Budesonide	1	d7	in 10mM DMSO	FDA,DMF,EMA,HMA,CFDA,NDC,PMDA	USP42-NF37;BP2019;EP9.2;IP2010;Martindale:The Extra Pharmacopoeia	077519,078202,078404,078949,078949,090379,090410,201966,204548,205457,205710,206134,206200,206623,206724,207367,209041,210897,211929	Immunology/Inflammation	Glucocorticoid Receptor	Endocrinology & Hormones	Budesonide is a glucocorticoid steroid for the treatment of asthma, non-infectious rhinitis.	430.53	51333-22-3	86	199.75	<1		http://selleckchem.com/products/Budesonide.html	C25H34O6	free base	N/A	CCCC1OC2CC3C4CCC5=CC(=O)C=CC5(C)C4C(O)CC3(C)C2(O1)C(=O)CO	2.198	4	2	4
S1287	Bumetanide	1	f7	in 10mM DMSO	FDA,DMF,CFDA,NDC,PMDA	USP42-NF37;BP2019;KP Ⅹ;EP9.2;JP17;IP2010	074160,074225,074332,074441,074613,074700,079196,202900,209724,209916	Cardiovascular Disease	Others	Others	Bumetanide (Bumex) is a loop diuretic of the sulfamyl category to treat heart failure.	364.42	28395-03-1	73	200.32	<1		http://selleckchem.com/products/Bumetanide.html	C17H20N2O5S	free base	N/A	CCCCNC1=C(OC2=CC=CC=C2)C(=CC(=C1)C(O)=O)[S](N)(=O)=O	2.862	4	2	8
S1289	Carmofur	1	h7	in 10mM DMSO	CFDA	KP Ⅹ;JP17;Martindale:The Extra Pharmacopoeia	N/A	Cancer	DNA/RNA Synthesis	DNA Damage	Carmofur is a highly potent acid ceramidase inhibitor, used in the treatment of breast and colorectal cancer.	257.26	61422-45-5	52	202.13	<1		http://selleckchem.com/products/Carmofur.html	C11H16FN3O3	free base	HCFU	CCCCCCNC(=O)N1C=C(F)C(=O)NC1=O	1.125	3	2	5
S1291	Cetirizine DiHCl	1	j7	in 10mM DMSO	FDA,DMF,CFDA,NDC,PMDA,HMA	USP42-NF37;BP2019;KP Ⅹ;EP9.2;JP17;IP2010;Martindale:The Extra Pharmacopoeia	076601,077279,077472,078398,078412,078488,078496,078617,078757,078870,078876,090191,090751,090766	Immunology/Inflammation	Histamine Receptor	Neuronal Signaling	Cetirizine DiHCl is an antihistamine.	461.81	83881-52-1	92	199.22	92	199.22	http://selleckchem.com/products/Cetirizine-Dihydrochloride.html	C21H27Cl3N2O3	Dihydrochloride	UCB P071	Cl.Cl.OC(=O)COCCN1CCN(CC1)C(C2=CC=CC=C2)C3=CC=C(Cl)C=C3	1.217	2	0	8
S1293	Cilnidipine	1	l7	in 10mM DMSO	DMF,CFDA,PMDA	JP17;Martindale:The Extra Pharmacopoeia	N/A	Cardiovascular Disease	Calcium Channel	Transmembrane Transporters	Cilnidipine is a unique L-type and N-type calcium channel blocker, used for high blood pressure treatment.	492.52	132203-70-4	99	201.01	<1		http://selleckchem.com/products/Cilnidipine.html	C27H28N2O7	free base	FRC-8653	COCCOC(=O)C1=C(C)NC(=C(C1C2=CC(=CC=C2)[N+]([O-])=O)C(=O)OC\C=C\C3=CC=CC=C3)C	3.686	5	1	12
S1294	Cilostazol	1	n7	in 10mM DMSO	FDA,DMF,CFDA,NDC,PMDA,HMA	USP42-NF37;KP Ⅹ;JP17;Martindale:The Extra Pharmacopoeia	077019,077020,077021,077022,077024,077027,077028,077030,077150,077208,077310,077323,077708,077722,077831,077898	Cardiovascular Disease	PDE	Metabolism	Cilostazol is a potent cyclic nucleotide phosphodiesterase type 3 (PDE3) inhibitor with IC50 of 0.2 μM and inhibitor of adenosine uptake.	369.46	73963-72-1	74	200.29	<1		http://selleckchem.com/products/Cilostazol.html	C20H27N5O2	free base	OPC-13013	O=C1CCC2=C(N1)C=CC(=C2)OCCCCC3=NN=N[N]3C4CCCCC4	3.23	5	1	7
S1299	Floxuridine	1	p7	in 10mM DMSO	FDA,DMF,CFDA,NDC	USP42-NF37;Martindale:The Extra Pharmacopoeia	071055,075387,075837,203008	Cancer	DNA/RNA Synthesis	DNA Damage	Floxuridine is an antineoplastic antimetabolite, used in the treatment of colon carcinoma and colorectal cancer that has metastasized to the liver.	246.19	50-91-9	49	199.03	49	199.03	http://selleckchem.com/products/Floxuridine.html	C9H11FN2O5	free base	Deoxyfluorouridine, FDUR, NSC 27640	OCC1OC(CC1O)N2C=C(F)C(=O)NC2=O	-1.775	3	3	2
S1300	Tegafur (FT-207, NSC 148958)	1	b9	in 10mM DMSO	DMF,EMA,HMA,CFDA,PMDA	KP Ⅹ;JP17;Martindale:The Extra Pharmacopoeia	N/A	Cancer	DNA/RNA Synthesis	DNA Damage	Tegafur (FT-207, NSC 148958) is a substance being used in the treatment of some types of cancer.	200.17	17902-23-7	40	199.83	8	39.97	http://selleckchem.com/products/Ftorafur.html	C8H9FN2O3	free base	Fluorafur	FC1=CN(C2CCCO2)C(=O)NC1=O	-0.625	3	1	1
S1302	Ifosfamide	1	d9	in 10mM DMSO	FDA,DMF,CFDA,NDC,PMDA	USP42-NF37;BP2019;EP9.2;Martindale:The Extra Pharmacopoeia	076078,076619,076657,090181,201689	Cancer	DNA/RNA Synthesis	DNA Damage	Ifosfamide is a nitrogen mustard alkylating agent used in the treatment of cancer.	261.09	3778-73-2	52	199.17	52	199.17	http://selleckchem.com/products/Ifosfamide.html	C7H15Cl2N2O2P	free base	NSC109724, Isophosphamide	ClCCN[P]1(=O)OCCCN1CCCl	0.144	2	1	5
S1304	Megestrol Acetate	1	f9	in 10mM DMSO	FDA,DMF,CFDA,NDC	USP42-NF37;BP2019;KP Ⅹ;IP2010;Martindale:The Extra Pharmacopoeia	070646,070647,072422,072423,074458,074621,074745,075671,075681,075997,076721,077404,203139,203960,204688	Cancer/Endocrinology	Androgen Receptor,Estrogen/progestogen Receptor	Endocrinology & Hormones	Megestrol acetate is a synthetic progestogen, used to treat breast cancer and loss of appetite.	384.51	595-33-5	33	85.82	<1		http://selleckchem.com/products/Megestrol-Acetate.html	C24H32O4	free base	BDH1298, SC10363	CC(=O)OC1(CCC2C3C=C(C)C4=CC(=O)CCC4(C)C3CCC12C)C(C)=O	3.505	4	0	3
S1305	Mercaptopurine (6-MP)	1	h9	in 10mM DMSO	FDA,DMF,EMA,HMA,CFDA,NDC,PMDA	USP42-NF37;BP2019;KP Ⅹ;JP17;IP2010;Martindale:The Extra Pharmacopoeia	040461,040528,040594	Cancer/Immunology	DNA/RNA Synthesis	DNA Damage	Mercaptopurine is a widely used antileukemic agent and immunosuppressive drug that inhibits de novo purine synthesis through incorporation of thiopurine methyltransferase metabolites into DNA and RNA.	152.18	50-44-2	30	197.13	<1		http://selleckchem.com/products/Mercaptopurine.html	C5H4N4S	free base	N/A	S=C1N=CNC2=C1[NH]C=N2	0.367	2	2	0
S1312	Streptozotocin (STZ)	1	j9	in 10mM DMSO	DMF	N/A	N/A	Cancer	DNA alkylator	DNA Damage	Streptozotocin is a glucosamine-nitrosourea derivative, which is a methylating, carcinogenic, antibiotic and diabetes inducing agent.	265.22	18883-66-4	53	199.83	53	199.83	http://selleckchem.com/products/Streptozotocin.html	C8H15N3O7	free base	NSC-85998	CN(N=O)C(=O)NC1C(O)OC(CO)C(O)C1O	-2.285	3	4	3
S1319	Costunolide	1	l9	in 10mM DMSO	N/A	BP2019;EP9.2	N/A	Others	Telomerase	DNA Damage	Costunolide, a natural sesquiterpene compound with multiple biological activities inhibits FPTase with IC50 of 20 μM, also inhibits telomerase with IC50 of 65-90 μM.	232.32	553-21-9	47	202.31	<1		http://selleckchem.com/products/Costunolide.html	C15H20O2	free base	NSC 106404	CC/1=C\CC\C(=C\C2OC(=O)C(=C)C2CC1)C	4.022	2	0	0
S1322	Dexamethasone (DHAP)	1	n9	in 10mM DMSO	FDA,DMF,EMA,HMA,CFDA,NDC,PMDA	USP39-NF34;BP2015;JP16;IP2010	040700,080399,080968,083420,083806,084013,084081,084084,084086,084327,084457,084610,084611,084612,084613,084614,084754,084763,084764,084765,084766,085376,085455,085456,085458,085818,085840,087533,087534,087916,088149,088237,088248,088254,088306,088316,088448,088469,088481,088997,089170,090891,091188,201270	Immunology/Inflammation/Infection/Respiratory Disease	Autophagy,IL Receptor	Others	Dexamethasone (DHAP) is a potent synthetic member of the glucocorticoid class of steroid drugs, and an interleukin receptor modulator that has anti-inflammatory and immunosuppressant effects.	392.46	50-02-2	79	201.29	<1		http://selleckchem.com/products/Dexamethasone.html	C22H29FO5	free base	N/A	CC1CC2C3CCC4=CC(=O)C=CC4(C)C3(F)C(O)CC2(C)C1(O)C(=O)CO	1.708	2	2	2
S1324	Doxazosin Mesylate	1	p9	in 10mM DMSO	FDA,DMF,CFDA,NDC,PMDA,HMA	USP42-NF37;EP9.8;BP2019;KP Ⅹ;JP17;Martindale:The Extra Pharmacopoeia	075353,075426,075432,075453,075466,075509,075536,075574,075580,075609,075646,075750,076161,202824,205210,208719,209013	Cardiovascular Disease	Adrenergic Receptor	Neuronal Signaling	Doxazosin, a quinazoline-derivative, selectively antagonizes postsynaptic α1-adrenergic receptors, used in the treatment of high blood pressure and urinary retention associated with benign prostatic hyperplasia.	547.58	77883-43-3	15	27.39	<1		http://selleckchem.com/products/Doxazosin-mesylate.html	C24H29N5O8S	Mesylate	N/A	COC1=C(OC)C=C2C(=NC(=NC2=C1)N3CCN(CC3)C(=O)C4COC5=C(O4)C=CC=C5)N.C[S](O)(=O)=O	2.071	7	1	4
S1326	Edaravone	1	b11	in 10mM DMSO	FDA,CFDA,NDC,PMDA	JP17;Martindale:The Extra Pharmacopoeia	209176	Cardiovascular Disease	Others	Others	Edaravone is a novel potent free radical scavenger that has been clinically used to reduce the neuronal damage following ischemic stroke.	174.2	89-25-8	35	200.92	<1		http://selleckchem.com/products/Edaravone.html	C10H10N2O	free base	MCI-186	CC1=NN(C(=O)C1)C2=CC=CC=C2	1.123	2	0	1
S1328	Etodolac	1	d11	in 10mM DMSO	FDA,DMF,CFDA,NDC,PMDA,HMA	USP42-NF37;BP2019;KP Ⅹ;JP17;IP2010;Martindale:The Extra Pharmacopoeia	074819,074839,074840,074841,074842,074844,074846,074847,074883,074892,074899,074903,074927,074929,074932,074942,075009,075012,075069,075071,075074,075078,075104,075126,075226,075419,075665,075696,075829,075943,076004,076174,091134,208834,209888	Inflammation	COX	Neuronal Signaling	Etodolac is a nonsteroidal anti-inflammatory drug (NSAID) and a COX inhibitor, used for the treatment of inflammation and pain.	287.35	41340-25-4	58	201.84	<1		http://selleckchem.com/products/Etodolac.html	C17H21NO3	free base	N/A	CCC1=CC=CC2=C1[NH]C3=C2CCOC3(CC)CC(O)=O	3.723	2	1	4
S1329	Etomidate	1	f11	in 10mM DMSO	FDA,DMF,CFDA,NDC,HMA	USP42-NF37;BP2019;EP9.2;Martindale:The Extra Pharmacopoeia	074593,078289,078867,091297,201044,202354,202360,204618,206126,209058	Neurological Disease	GABA Receptor	Neuronal Signaling	Etomidate is a GABAA receptor agonist, used as a short-acting anaesthetic agent or sedative.	244.29	33125-97-2	49	200.58	<1		http://selleckchem.com/products/Etomidate.html	C14H16N2O2	free base	R16659	CCOC(=O)C1=CN=C[N]1C(C)C2=CC=CC=C2	2.379	3	0	5
S1330	Felbamate	1	h11	in 10mM DMSO	FDA,DMF,NDC,HMA	USP42-NF37;Martindale:The Extra Pharmacopoeia	201680,202284,202385,204595,206314,207093,208970	Neurological Disease	NMDAR	Neuronal Signaling	Felbamate (Felbatol) is an anticonvulsant drug used in the treatment of epilepsy NMDAR antagonist.	238.24	25451-15-4	48	201.48	<1		http://selleckchem.com/products/Felbamate.html	C11H14N2O4	free base	ADD-03055	NC(=O)OCC(COC(N)=O)C1=CC=CC=C1	0.984	4	2	7
S1331	Fluconazole	1	j11	in 10mM DMSO	FDA,DMF,CFDA,NDC,PMDA,HMA	USP42-NF37;BP2019;EP9.2;JP17;Ph.Int_6th;IP2010;Martindale:The Extra Pharmacopoeia	074681,076042,076077,076086,076213,076246,076332,076351,076386,076424,076432,076507,076658,076665,076918,076957,077253,077523,077731,078423,079150,208963	Infection	P450 (e.g. CYP17)	Metabolism	Fluconazole is a fungal lanosterol 14 alpha-demethylase inhibitor, which thereby prevents the formation of ergosterol,used in the treatment and prevention of superficial and systemic fungal infections.	306.27	86386-73-4	61	199.17	<1		http://selleckchem.com/products/Fluconazole.html	C13H12F2N6O	free base	UK 49858	OC(C[N]1C=NC=N1)(C[N]2C=NC=N2)C3=C(F)C=C(F)C=C3	0.75	4	0	5
S1332	Flumazenil	1	l11	in 10mM DMSO	FDA,DMF,CFDA,NDC,PMDA,HMA	USP42-NF37;BP2019;EP9.2;Martindale:The Extra Pharmacopoeia	076256,076589,076755,076787,076955,077071,078527,078595,090584	Neurological Disease	GABA Receptor	Neuronal Signaling	Flumazenil is a competitive GABAA receptor antagonist, used in the treatment of benzodiazepine overdoses.	303.29	78755-81-4	5	16.49	<1		http://selleckchem.com/products/Flumazenil.html	C15H14FN3O3	free base	RO 15-1788	CCOC(=O)C1=C2CN(C)C(=O)C3=CC(=CC=C3[N]2C=N1)F	1.583	4	0	3
S1333	Fluoxetine HCl	1	n11	in 10mM DMSO	FDA,DMF,CFDA,NDC,HMA	USP42-NF37;BP2019;KP Ⅹ;EP9.2;IP2010;Martindale:The Extra Pharmacopoeia	075662,075787,074803,075049,075207,075245,075292,075452,075464,075465,075506,075514,075525,075577,075658,075690,075755,075807,075810,075865,075872,075920,076001,076006,076015,076022,076024,076165,076237,076251,076287,076458,076922,076990,077469,077849,078045,078143,078572,078619,079209,090223,201336,202133,203836,204597,206937,206993,208698,209419,209695,210935,211051,211282,211477,211632,211653,…	Neurological Disease	5-HT Receptor	Neuronal Signaling	Fluoxetine is a selective serotonin-reuptake inhibitor (SSRI) at the neuronal membrane, used in the treatment of depression.	345.79	56296-78-7	69	199.54	4	11.57	http://selleckchem.com/products/Fluoxetine-hydrochloride.html	C17H19ClF3NO	Hydrochloride	Lilly110140	Cl.CNCCC(OC1=CC=C(C=C1)C(F)(F)F)C2=CC=CC=C2	4.415	1	1	7
S1334	Flupirtine maleate	1	p11	in 10mM DMSO	DMF,CFDA,HMA	Martindale:The Extra Pharmacopoeia	N/A	Neurological Disease	DNA/RNA Synthesis	DNA Damage	Flupirtine maleate is the salt form of Flupirtine, which is a centrally acting non-opioid analgesia, is a selective neuronal potassium channel opener that also has NMDA receptor antagonist properties.	420.39	75507-68-5	84	199.81	<1		http://selleckchem.com/products/Flupirtine-maleate.html	C19H21FN4O6	Maleate	N/A	CCOC(=O)NC1=C(N)N=C(NCC2=CC=C(F)C=C2)C=C1.OC(=O)\C=C\C(O)=O	2.76	5	3	8
S1336	Fluvoxamine maleate	1	b13	in 10mM DMSO	FDA,DMF,CFDA,NDC,PMDA,HMA	USP42-NF37;BP2019;EP9.2;JP17;Martindale:The Extra Pharmacopoeia	075887,075888,075889,075893,075894,075897,075898,075899,075900,075901,075902,075950,076125,091476,091482,203240	Neurological Disease	5-HT Receptor	Neuronal Signaling	Fluvoxamine Maleate is a selective serotonin (5-HT) reuptake inhibitor (SSRI), used in the treatment of obsessive-compulsive disorder.	434.41	61718-82-9	87	200.27	<1		http://selleckchem.com/products/Fluvoxamine-maleate.html	C19H25F3N2O6	Maleate	MK-264	COCCCCC(=N\OCCN)/C1=CC=C(C=C1)C(F)(F)F.OC(=O)\C=C/C(O)=O	0.111	5	1	12
S1340	Gatifloxacin	1	d13	in 10mM DMSO	FDA,DMF,CFDA,NDC,PMDA,HMA	USP;IP2010;Martindale:The Extra Pharmacopoeia	079084,202653,203189,203190,204227,206446	Infection	Topoisomerase	DNA Damage	Gatifloxacin is an antibiotic of the fourth-generation fluoroquinolone family, and inhibits the bacterial enzymes DNA gyrase and topoisomerase IV.	375.39	112811-59-3	7	18.65	<1		http://selleckchem.com/products/Gatifloxacin.html	C19H22FN3O4	free base	AM-1155, CG5501, BMS-206584	COC1=C2N(C=C(C(O)=O)C(=O)C2=CC(=C1N3CCNC(C)C3)F)C4CC4	-0.909	3	1	4
S1342	Genistein	1	f13	in 10mM DMSO	DMF	Martindale:The Extra Pharmacopoeia	N/A	Cancer/Cardiovascular Disease/Infection	EGFR,Topoisomerase	Protein Tyrosine Kinase	Genistein, a phytoestrogen found in soy products, is a highly specific inhibitor of protein tyrosine kinase (PTK) which blocks the mitogenic effect mediated by EGF on NIH-3T3 cells with IC50 of 12μM or by insulin with IC50 of 19 μM.	270.24	446-72-0	54	199.82	<1		http://selleckchem.com/products/Genistein.html	C15H10O5	free base	N/A	OC1=CC=C(C=C1)C2=COC3=C(C(=CC(=C3)O)O)C2=O	2.14	2	3	1
S1344	Glimepiride	1	h13	in 10mM DMSO	FDA,DMF,EMA,HMA,CFDA,NDC,PMDA	USP42-NF37;BP2019;KP Ⅹ;EP9.2;JP17;IP2010;Martindale:The Extra Pharmacopoeia	076802,076875,076995,077091,077274,077280,077295,077366,077370,077486,077624,077911,078181,078952,091220,202112,202759	Endocrinology/Metabolic Disease	Potassium Channel	Transmembrane Transporters	Glimepiride is a potent Kir6.2/SUR inhibitor with IC50 of 3.0 nM, 5.4 nM, and 7.3 nM for SUR1, SUR2A and SUR2B, used in the treatment of type 2 diabetes mellitus.	490.62	93479-97-1	11	22.42	<1		http://selleckchem.com/products/Glimepiride.html	C24H34N4O5S	free base	N/A	CCC1=C(C)CN(C(=O)NCCC2=CC=C(C=C2)[S](=O)(=O)NC(=O)NC3CCC(C)CC3)C1=O	3.781	5	3	7
S1351	Ivermectin	1	j13	in 10mM DMSO	FDA,DMF,CFDA,NDC,PMDA,HMA	USP42-NF37;BP2019;EP9.2;Martindale:The Extra Pharmacopoeia	204154,210019,210720	Infection	Chloride Channel,Anti-infection	Transmembrane Transporters	Ivermectin is a glutamate-gated chloride channel (GluCls) activator, used as a broad-spectrum antiparasitic drug.	875.09	70288-86-7	100	114.27	<1		http://selleckchem.com/products/Ivermectin.html	C48H74O14	Free Base	MK933	CCC(C)C1OC2(CCC1C)CC3CC(C\C=C(C)\C(OC4CC(OC)C(OC5CC(OC)C(O)C(C)O5)C(C)O4)C(C)\C=C\C=C\6COC7C(O)C(=CC(C(=O)O3)C67O)C)O2	4.743	11	2	8
S1354	Lansoprazole	1	l13	in 10mM DMSO	FDA,DMF,CFDA,NDC,PMDA,HMA	USP42-NF37;EP9.3;BP2019;KP Ⅹ;JP17;IP2010;Martindale:The Extra Pharmacopoeia	077255,078730,090331,090763,091212,091269,091509,200816,201921,202176,202194,202319,202366,202396,202637,202727,203187,203203,203306,203957,203964,205868,207156,207157,207394,208025,208784,200218,202588,206006	Gastrointestinal Disease	Proton Pump	Transmembrane Transporters	Lansoprazole is a proton-pump inhibitor (PPI) which prevents the stomach from producing gastric acid.	369.36	103577-45-3	74	200.35	<1		http://selleckchem.com/products/Lansoprazole.html	C16H14F3N3O2S	free base	A-65006, AG-1749	CC1=C(OCC(F)(F)F)C=CN=C1C[S](=O)C2=NC3=CC=CC=C3[NH]2	3.442	4	1	6
S1356	Levetiracetam	1	n13	in 10mM DMSO	FDA,DMF,EMA,HMA,CFDA,NDC,PMDA	USP42-NF37;EP9.4;BP2019;Martindale:The Extra Pharmacopoeia	076919,076920,077319,077324,077408,078042,078101,078106,078154,078234,078526,078582,078731,078774,078797,078858,078869,078904,078918,078960,078976,078993,079042,079063,079107,079120,090025,090028,090079,090187,090261,090263,090461,090484,090511,090515,090601,090754,090767,090813,090843,090876,090893,090981,090992,091093,091261,091285,091291,091338,091360,091399,091430,091485,091491,091557,091627,…	Neurological Disease	Calcium Channel	Transmembrane Transporters	Levetiracetam is an anticonvulsant medication used to treat epilepsy.	170.21	102767-28-2	34	199.75	34	199.75	http://selleckchem.com/products/Levetiracetam.html	C8H14N2O2	free base	UCB-L059, SIB-S1	CCC(N1CCCC1=O)C(N)=O	-0.304	2	1	3
S1357	Lidocaine	1	p13	in 10mM DMSO	FDA,DMF,EMA,HMA,CFDA,NDC,PMDA	Ph.Int_6th;JP17;BP2017;USP40-NF35;IP2010;Martindale:The Extra Pharmacopoeia	040911,080198,080210,086724,200675,202346,205318,206297,206498,207810,208604,208822,210256,210958,211019,211469	Neurological Disease	Histamine Receptor	Neuronal Signaling	Lidocaine is a selective inverse peripheral histamine H1-receptor agonist with an IC50 of >32 μM.	234.34	137-58-6	47	200.56	9	38.41	http://selleckchem.com/products/Lidocaine.html	C14H22N2O	Free Base	Alphacaine	CCN(CC)CC(=O)NC1=C(C)C=CC=C1C	2.626	1	1	5
S1358	Loratadine	1	b15	in 10mM DMSO	FDA,DMF,CFDA,NDC,PMDA,HMA	USP42-NF37;BP2019;EP9.2;Martindale:The Extra Pharmacopoeia	021512,021734,075209,075505,075565,075728,075790,075815,075822,075990,076011,076134,076154,076301,076471,076529,076805,077421,078447,201865,202538,206214,207569,208314,208477,208931,210088	Immunology	Histamine Receptor	Neuronal Signaling	Loratadine is a histamine H1 receptor antagonist, used to treat allergies. Also acts as a selective inhibitor of B(0)AT2 with IC50 of 4 μM.	382.88	79794-75-5	17	44.4	<1		http://selleckchem.com/products/Loratadine.html	C22H23ClN2O2	free base	SCH29851	CCOC(=O)N1CCC(CC1)=C2C3=C(CCC4=C2N=CC=C4)C=C(Cl)C=C3	5	3	0	2
S1359	Losartan Potassium (DuP 753)	1	d15	in 10mM DMSO	FDA,DMF,CFDA,NDC,PMDA,HMA	USP42-NF37;BP2019;KP Ⅹ;EP9.2;JP17;IP2010;Martindale:The Extra Pharmacopoeia	076958,077424,077459,078232,078243,090083,090382,090428,090467,090544,090790,091129,091497,091541,091590,200290,201170,202230,203030,203835,204795	Cardiovascular Disease/Endocrinology/Metabolic Disease	RAAS	Endocrinology & Hormones	Losartan is an angiotensin II receptor antagonist, competes with the binding of angiotensin II to AT1 receptors with IC50 of 20 nM.	462.01	124750-99-8	92	199.13	92	199.13	http://selleckchem.com/products/losartan-potassium.html	C22H23ClKN6O	Potassium salt	MK 954	[KH].CCCCC1=NC(=C(CO)[N]1CC2=CC=C(C=C2)C3=C(C=CC=C3)C4=NN=N[NH]4)Cl	4.241	4	2	8
S1367	Amonafide	1	f15	in 10mM DMSO	DMF	Martindale:The Extra Pharmacopoeia	N/A	Cancer	Topoisomerase	DNA Damage	Amonafide produces protein-associated DNA-strand breaks through a topoisomerase II-mediated reaction, but does not produce topoisomerase I-mediated DNA cleavage. Phase 3.	283.33	69408-81-7	57	201.18	<1		http://selleckchem.com/products/Amonafide.html	C16H17N3O2	free base	NSC308847,AS1413	CN(C)CCN1C(=O)C2=C3C(=CC=C2)C=C(N)C=C3C1=O	1.162	2	1	3
S1368	Acitretin	1	h15	in 10mM DMSO	FDA,DMF,CFDA,NDC,HMA	USP42-NF37;BP2019;EP9.5;Martindale:The Extra Pharmacopoeia	091455,202148,202552,202897,203707,204633	Immunology	Retinoid Receptor	Metabolism	Acitretin is a second generation retinoid used for psoriasis.	326.43	55079-83-9	20	61.27	<1		http://selleckchem.com/products/Acitretin.html	C21H26O3	free base	Etretin, RO 10-1670	COC1=CC(=C(\C=C\C(C)=C\C=C\C(C)=C\C(O)=O)C(=C1C)C)C	5.665	2	0	6
S1373	Daptomycin	1	j15	in 10mM DMSO	FDA,DMF,EMA,HMA,CFDA,NDC,PMDA	Martindale:The Extra Pharmacopoeia	091039,202857,203797,205037,206005,206077,208375,208385,209949	Infection	Anti-infection,DNA/RNA Synthesis	DNA Damage	Daptomycin is a novel antibiotic with rapid in vitro bactericidal activity against gram-positive organisms.	1620.67	103060-53-3	100	61.7	100	61.7	http://selleckchem.com/products/Daptomycin.html	C72H101N17O26	free base	LY146032	CCCCCCCCCC(=O)NC(CC1=C[NH]C2=C1C=CC=C2)C(=O)NC(CC(N)=O)C(=O)NC(CC(O)=O)C(=O)NC3C(C)OC(=O)C(CC(=O)C4=CC=CC=C4N)NC(=O)C(NC(=O)C(CO)NC(=O)CNC(=O)C(CC(O)=O)NC(=O)C(C)NC(=O)C(CC(O)=O)NC(=O)C(CCCN)NC(=O)CNC3=O)C(C)CC(O)=O	-7.895	21	18	35
S1374	Doripenem Hydrate	1	l15	in 10mM DMSO	FDA,DMF,EMA,NDC,PMDA	Martindale:The Extra Pharmacopoeia	022106	Infection	Anti-infection	Microbiology	Doripenem Hydrate is an ultra-broad-spectrum injectable antibiotic, used to treat complicated intra-abdominal infections and complicated urinary tract infections.	438.52	364622-82-2	36	82.09	26	59.29	http://selleckchem.com/products/Doripenem-Hydrate.html	C15H26N4O7S2	Hydrate	S-4661	O.CC(O)C1C2C(C)C(=C(N2C1=O)C(O)=O)SC3CNC(CN[S](N)(=O)=O)C3	-5.546	4	4	7
S1376	Gestodene	1	n15	in 10mM DMSO	DMF,CFDA,NDC,HMA	BP2019;EP9.2;Martindale:The Extra Pharmacopoeia	N/A	Endocrinology	Estrogen/progestogen Receptor	Endocrinology & Hormones	Gestodene is a progestogen hormonal contraceptive.	310.43	60282-87-3	62	199.72	<1		http://selleckchem.com/products/Gestodene.html	C21H26O2	free base	SH B 331	CCC12CCC3C(CCC4=CC(=O)CCC34)C1C=CC2(O)C#C	4.462	1	0	1
S1377	Drospirenone	1	p15	in 10mM DMSO	FDA,DMF,NDC,HMA	USP42-NF37;BP2019;EP9.2;Martindale:The Extra Pharmacopoeia	077527,078515,078833,090081,201663,202131,202594,203291,204296,204848,205876,207245,209423,210017,211944,203593,203594,205947	Endocrinology	Estrogen/progestogen Receptor	Endocrinology & Hormones	Drospirenone is a synthetic progestin that is an analog to spironolactone.	366.49	67392-87-4	73	199.19	<1		http://selleckchem.com/products/Drospirenone.html	C24H30O3	free base	ZK 3059	CC12CCC(=O)C=C1C3CC3C4C2CCC5(C)C4C6CC6C57CCC(=O)O7	3.383	3	0	0
S1378	Ruxolitinib (INCB018424)	1	b17	in 10mM DMSO	FDA,DMF,EMA,NDC,PMDA	N/A	202192	Hematology	JAK	JAK/STAT	Ruxolitinib (INCB018424) is the first potent, selective, JAK1/2 inhibitor to enter the clinic with IC50 of 3.3 nM/2.8 nM in cell-free assays, >130-fold selectivity for JAK1/2 versus JAK3.	306.37	941678-49-5	61	199.11	<1		http://selleckchem.com/products/INCB18424.html	C17H18N6	free base	N/A	N#CCC(C1CCCC1)[N]2C=C(C=N2)C3=NC=NC4=C3C=C[NH]4	2.88	3	1	4
S1379	Isotretinoin	1	d17	in 10mM DMSO	FDA,DMF,CFDA,NDC,HMA	USP42-NF37;BP2019;KP Ⅹ;EP9.5;Martindale:The Extra Pharmacopoeia	207792	Cancer	Hydroxylase	Metabolism	It was developed to be used as a chemotherapy medication for the treatment of brain cancer, pancreatic cancer and more.	300.44	4759-48-2	60	199.71	<1		http://selleckchem.com/products/Isotretinoin.html	C20H28O2	free base	13-cis retinoic acid	CC1=C(\C=C\C(C)=C\C=C\C(C)=C/C(O)=O)C(C)(C)CCC1	5.551	1	0	5
S1380	Lopinavir	1	f17	in 10mM DMSO	FDA,DMF,EMA,HMA,NDC,PMDA	USP42-NF37;BP2019;EP9.2;Ph.Int_6th;IP2010;Martindale:The Extra Pharmacopoeia	205425,207407,204739,079074,090371,090471,091202,091203,091677,210540	Infection	HIV Protease	Proteases	Lopinavir is a potent HIV protease inhibitor with Ki of 1.3 pM in a cell-free assay.	628.8	192725-17-0	126	200.38	<1		http://selleckchem.com/products/Lopinavir.html	C37H48N4O5	free base	ABT-378	CC(C)C(N1CCCNC1=O)C(=O)NC(CC(O)C(CC2=CC=CC=C2)NC(=O)COC3=C(C)C=CC=C3C)CC4=CC=CC=C4	4.926	4	4	15
S1381	Meropenem	1	h17	in 10mM DMSO	FDA,DMF,EMA,HMA,CFDA,NDC,PMDA	USP42-NF37;BP2019;KP Ⅹ;Martindale:The Extra Pharmacopoeia	090940,091201,091404,204139,204854,205835,205883,206086,206141,202106	Infection/Respiratory Disease	Anti-infection	Microbiology	Meropenem is an ultra-broad spectrum injectable antibiotic.	383.46	96036-03-2	76	198.2	8	20.86	http://selleckchem.com/products/Meropenem.html	C17H25N3O5S	free base	SM 7338	CC(O)C1C2C(C)C(=C(N2C1=O)C(O)=O)SC3CNC(C3)C(=O)N(C)C	-4.129	3	2	5
S1382	Mianserin HCl	1	j17	in 10mM DMSO	DMF,CFDA,PMDA	BP2019;EP9.2;IP2010	N/A	Neurological Disease	Histamine Receptor	Neuronal Signaling	Mianserin is an potent antagonist of H1 histamine receptor and 5-HT serotonin receptors, used for the treatment of depression.	300.83	21535-47-7	60	199.45	30	99.72	http://selleckchem.com/products/mianserin-hydrochloride.html	C18H21ClN2	Hydrochloride	ORG GB-94 HCl	Cl.CN1CCN2C(C1)C3=C(CC4=C2C=CC=C4)C=CC=C3	4.088	0	0	0
S1385	Mosapride Citrate	1	l17	in 10mM DMSO	DMF,CFDA,PMDA	KP Ⅹ;JP17;IP2010;Martindale:The Extra Pharmacopoeia	N/A	Gastrointestinal Disease	5-HT Receptor	Neuronal Signaling	Mosapride Citrate is a gastroprokinetic agent that acts as a selective 5HT4 agonist.	614.02	112885-42-4	90	146.58	<1		http://selleckchem.com/products/Mosapride-citrate.html	C27H33ClFN3O10	Citrate	AS-4370	CCOC1=CC(=C(Cl)C=C1C(=O)NCC2CN(CCO2)CC3=CC=C(F)C=C3)N.OC(=O)CC(O)(CC(O)=O)C(O)=O	-1.422	6	2	12
S1386	Nafamostat Mesylate	1	n17	in 10mM DMSO	PMDA	JP17;Martindale:The Extra Pharmacopoeia	N/A	Infection/Hematology	Serine Protease	Proteases	Nafamostat mesilate is a synthetic serine protease inhibitor, used as an anticoagulant during hemodialysis.	539.58	82956-11-4	20	37.07	53	98.22	http://selleckchem.com/products/Nafamostat-mesylate.html	C21H25N5O8S2	Dimesylate	FUT-175	C[S](O)(=O)=O.C[S](O)(=O)=O.NC(=N)NC1=CC=C(C=C1)C(=O)OC2=CC3=C(C=C2)C=C(C=C3)C(N)=N	1.364	2	3	6
S1387	Naftopidil DiHCl	1	p17	in 10mM DMSO	DMF,CFDA,PMDA	JP17;Martindale:The Extra Pharmacopoeia	N/A	Others	Adrenergic Receptor	Neuronal Signaling	Naftopidil DiHCl is a selective 5-HT1A and α1-adrenergic receptor antagonist with IC50 of 0.1 μM and 0.2 μM, respectively.	465.41	57149-08-3	41	88.09	<1		http://selleckchem.com/products/Naftopidil-Dihydrochloride.html	C24H30Cl2N2O3	Dihydrochloride	KT-611	Cl.Cl.COC1=CC=CC=C1N2CCN(CC2)CC(O)COC3=C4C=CC=CC4=CC=C3	4.726	2	1	7
S1389	Omeprazole	1	b19	in 10mM DMSO	FDA,DMF,CFDA,NDC,PMDA,HMA	USP42-NF37;EP9.7;BP2019;KP Ⅹ;IP2010;Martindale:The Extra Pharmacopoeia	022032,075347,075410,075576,075757,075785,075791,075876,076048,076515,078490,091352,091672,202384,203270,203481,204661,205070,206582,207740,207891,209400,210070	Cancer/Gastrointestinal Disease	Proton Pump,Autophagy	Transmembrane Transporters	Omeprazole is a proton pump inhibitor, used to treat dyspepsia, peptic ulcer disease, gastroesophageal reflux disease, laryngopharyngeal reflux, and Zollinger–Ellison syndrome.	345.42	73590-58-6	69	199.76	<1		http://selleckchem.com/products/Omeprazole.html	C17H19N3O3S	free base	N/A	COC1=CC=C2[NH]C(=NC2=C1)[S](=O)CC3=C(C)C(=C(C)C=N3)OC	2.904	5	1	5
S1390	Ondansetron HCl	1	d19	in 10mM DMSO	FDA,DMF,CFDA,NDC,PMDA,HMA	USP42-NF37;BP2019;KP Ⅹ;IP2010;Martindale:The Extra Pharmacopoeia	076183,076252,076695,076781,076876,076930,076930,076960,076967,076974,077009,077050,077112,077172,077303,077306,077365,077368,077430,077473,077517,077535,077544,077545,077577,077582,077729,077840,077851,078127,078180,078257,078288,078539,078776,079039,079224,090116,090424,090648,090883,091342,091483,202599,203711,203761,204906,206846	Gastrointestinal Disease	5-HT Receptor	Neuronal Signaling	Ondansetron is a serotonin 5-HT3 receptor antagonist, used to prevent nausea and vomiting caused by cancer chemotherapy, and radiation therapy.	329.82	99614-01-4	66	200.11	24	72.77	http://selleckchem.com/products/Ondansetron-hydrochloride.html	C18H20ClN3O	Hydrochloride	GR 38032F	Cl.C[N]1C2=C(C(=O)C(CC2)C[N]3C=CN=C3C)C4=CC=CC=C14	3.016	2	0	2
S1391	Oxcarbazepine	1	f19	in 10mM DMSO	FDA,DMF,CFDA,NDC,HMA	USP42-NF37;BP2019;EP9.2;IP2010;Martindale:The Extra Pharmacopoeia	077747,077794,077795,077801,077802,078005,078069,078734,090239,201193,202961,205444,206576	Neurological Disease	Sodium Channel	Transmembrane Transporters	Oxcarbazepine inhibits the binding of [3H]BTX to sodium channels with IC50 of 160 μM and also inhibits the influx of 22Na+ into rat brain synaptosomes with IC50 about 100 μM.	252.27	28721-07-5	7	27.75	<1		http://selleckchem.com/products/Oxcarbazepine.html	C15H12N2O2	free base	GP47680	NC(=O)N1C2=C(CC(=O)C3=C1C=CC=C3)C=CC=C2	2.131	2	1	0
S1393	Pirarubicin	1	h19	in 10mM DMSO	DMF,CFDA	KP Ⅹ;JP17;Martindale:The Extra Pharmacopoeia	N/A	Cancer	Topoisomerase	DNA Damage	Pirarubicin is an anthracycline antibiotic, and also a DNA/RNA synthesis inhibitor by intercalating into DNA and interacts with topoisomerase II, used as an antineoplastic agent.	627.64	72496-41-4	7	11.15	<1		http://selleckchem.com/products/Pirarubicin.html	C32H37NO12	free base	N/A	COC1=CC=CC2=C1C(=O)C3=C(O)C4=C(CC(O)(CC4OC5CC(N)C(OC6CCCCO6)C(C)O5)C(=O)CO)C(=C3C2=O)O	1.091	8	4	7
S1394	Pizotifen Malate	1	j19	in 10mM DMSO	CFDA	BP2019;Martindale:The Extra Pharmacopoeia	N/A	Neurological Disease	5-HT Receptor	Neuronal Signaling	Pizotifen Malate is a benzocycloheptane based agent used for recurrent migraine headaches.	429.53	5189-11-7	21	48.89	<1		http://selleckchem.com/products/Pizotifen-malate.html	C23H27NO5S	Malate	BC-105	CN1CCC(CC1)=C2C3=C(CCC4=C2C=CC=C4)SC=C3.OC(CC(O)=O)C(O)=O	0.292	2	1	3
S1396	Resveratrol	1	l19	in 10mM DMSO	DMF,NDC	BP2019;EP9.2;Martindale:The Extra Pharmacopoeia	N/A	Cancer/Cardiovascular Disease/Inflammation	Autophagy	Autophagy	Resveratrol has a wide spectrum of targets including cyclooxygenases(i.e. COX, IC50=1.1 μM), lipooxygenases（LOX, IC50=2.7 μM）, kinases, sirtuins and other proteins. It has anti-cancer, anti-inflammatory, blood-sugar-lowering and other beneficial cardiovascular effects.	228.24	501-36-0	45	197.16	<1		http://selleckchem.com/products/Resveratrol.html	C14H12O3	free base	N/A	OC1=CC=C(C=C1)\C=C\C2=CC(=CC(=C2)O)O	3.09	0	3	2
S1397	Rocuronium Bromide	1	n19	in 10mM DMSO	FDA,DMF,CFDA,NDC,HMA	USP42-NF37;BP2019;EP9.2;Martindale:The Extra Pharmacopoeia	078519,078651,078717,079195,079199,091115,091458,204679,205656,206206	Neurological Disease	AChR	Neuronal Signaling	Rocuronium Bromide is a competitive AchR antagonist, used in modern anaesthesia.	609.68	119302-91-9	122	200.1	122	200.1	http://selleckchem.com/products/Rocuronium-bromide.html	C32H53BrN2O4	Bromide	ORG 9426	[Br-].CC(=O)OC1C(CC2C3CCC4CC(O)C(CC4(C)C3CCC12C)N5CCOCC5)[N+]6(CCCC6)CC=C	0.282	3	1	6
S1398	Stavudine (d4T)	1	p19	in 10mM DMSO	FDA,DMF,EMA,CFDA,NDC	USP42-NF37;BP2019;EP9.2;Ph.Int_6th;IP2010;IP2010	077672,077774,078030,078256,078587,078775,078957,079069	Infection	Reverse Transcriptase	Microbiology	Stavudine (d4T) is a nucleoside analog reverse transcriptase inhibitor (NARTI) active against HIV.	224.21	3056-17-5	45	200.7	<1		http://selleckchem.com/products/Stavudine.html	C10H12N2O4	free base	BMY-27857, Sanilvudine, NSC 163661	CC1=CN(C2OC(CO)C=C2)C(=O)NC1=O	-0.515	3	2	2
S1400	Tenofovir Disoproxil Fumarate	1	b21	in 10mM DMSO	FDA,DMF,EMA,HMA,CFDA,NDC,PMDA	Ph.Int_6th;IP2010;Martindale:The Extra Pharmacopoeia	078800,079071,090636,090647,090742,091612,203232,203470,204402,206481,206569,209498,209550	Infection	Reverse Transcriptase	Microbiology	Tenofovir Disoproxil Fumarate belongs to a class of antiretroviral drugs, it inhibits the activity of HIV reverse transcriptase by competing with the natural substrate deoxyadenosine 5’-triphosphate and, after incorporation into DNA, by DNA chain termination.	635.51	202138-50-9	100	157.35	<1		http://selleckchem.com/products/Tenofovir-Disoproxil-Fumarate.html	C23H34N5O14P	Fumarate	GS-1278 Disoproxil Fumarate	CC(C)OC(=O)OCO[P](=O)(COC(C)C[N]1C=NC2=C1N=CN=C2N)OCOC(=O)OC(C)C.OC(=O)/C=C/C(O)=O	1.729	14	1	19
S1401	Tenofovir	1	d21	in 10mM DMSO	FDA,DMF,EMA,HMA,CFDA,NDC,PMDA	Ph.Int_6th;IP2010;Martindale:The Extra Pharmacopoeia	078800,079071,090636,090647,090742,091612,203232,203470,204402,206481,206569,209498,209550	Infection	Reverse Transcriptase	Microbiology	Tenofovir blocks reverse transcriptase and hepatitis B virus infections.	287.21	147127-20-6	4	13.93	2	6.96	http://selleckchem.com/products/Tenofovir.html	C9H14N5O4P	free base	GS-1278	CC(C[N]1C=NC2=C(N)N=CN=C12)OC[P](O)(O)=O	-0.772	4	1	5
S1403	Tigecycline	1	f21	in 10mM DMSO	FDA,DMF,EMA,HMA,CFDA,NDC,PMDA	USP42-NF37;EP9.4;EP9.4;Martindale:The Extra Pharmacopoeia	091620,204439,205645,208744,211158	Infection	Anti-infection	Microbiology	Tigecycline is bacteriostatic and is a protein synthesis inhibitor by binding to the 30S ribosomal subunit of bacteria and thereby blocking entry of Aminoacyl-tRNA into the A site of the ribosome during prokaryotic translation.	585.65	220620-09-7	100	170.75	100	170.75	http://selleckchem.com/products/Tigecycline.html	C29H39N5O8	free base	GAR-936	CN(C)C1C2CC3CC4=C(C(=C(NC(=O)CNC(C)(C)C)C=C4N(C)C)O)C(=O)C3=C(O)C2(O)C(=O)C(=C1O)C(N)=O	-0.381	4	6	7
S1404	Trilostane	1	h21	in 10mM DMSO	FDA,DMF,PMDA	Martindale:The Extra Pharmacopoeia	18719	Metabolic Disease	Dehydrogenase	Metabolism	Trilostane is an inhibitor of 3β-hydroxysteroid dehydrogenase used in the treatment of Cushing’s syndrome.	329.43	13647-35-3	65	197.31	<1		http://selleckchem.com/products/Trilostane.html	C20H27NO3	free base	WIN 24540	CC12CCC3C(CCC45OC4C(=C(CC35C)C#N)O)C1CCC2O	2.434	1	2	0
S1405	Vecuronium Bromide	1	j21	in 10mM DMSO	FDA,DMF,CFDA,NDC,PMDA,HMA	USP42-NF37;EP9.2;BP2019;Martindale:The Extra Pharmacopoeia	074334,074688,075164,075218,075549,075558,078274,079001,090243,205390,206670	Neurological Disease	AChR	Neuronal Signaling	Vecuronium is a non-depolarizing neuromuscular blocking agent, used for skeletal muscle relaxation during surgery.	637.73	50700-72-6	100	156.81	4	6.27	http://selleckchem.com/products/Vecuronium-Bromide.html	C34H57BrN2O4	Bromide	ORG NC45	[Br-].CC(=O)OC1CC2CCC3C(CCC4(C)C3CC(C4OC(C)=O)[N+]5(C)CCCCC5)C2(C)CC1N6CCCCC6	1.73	4	0	6
S1407	Bimatoprost	1	l21	in 10mM DMSO	FDA,DMF,EMA,HMA,NDC,PMDA	USP;Martindale:The Extra Pharmacopoeia	090449,200487,201894,202565,202719,203051,203056,203299,203404,203604,203991,209797,210126,210263,210515	Ophthalmology	Immunology & Inflammation related	Immunology & Inflammation	Bimatoprost is a prostaglandin analog used topically (as eye drops) to control the progression of glaucoma and in the management of ocular hypertension.	415.57	155206-00-1	36	86.63	<1		http://selleckchem.com/products/Bimatoprost.html	C25H37NO4	free base	N/A	CCNC(=O)CCC\C=C/CC1C(O)CC(O)C1/C=C/C(O)CCC2=CC=CC=C2	3.03	1	4	12
S1408	Linezolid	1	n21	in 10mM DMSO	FDA,DMF,CFDA,NDC,PMDA,HMA	USP42-NF37;IP2010;Martindale:The Extra Pharmacopoeia	078061,078845,078987,091210,200068,200222,200904,204239,204536,204696,204764,205154,205233,205442,205517,206097,206917,207001,207354,207526,210702	Infection/Respiratory Disease	Anti-infection	Microbiology	Linezolid is a synthetic antibiotic used for the treatment of serious infections.	337.35	165800-03-3	67	198.61	<1		http://selleckchem.com/products/Linezolid(Zyvox).html	C16H20FN3O4	free base	PNU-100766	CC(=O)NCC1CN(C(=O)O1)C2=CC=C(N3CCOCC3)C(=C2)F	0.894	4	1	4
S1409	Alfuzosin HCl	1	p21	in 10mM DMSO	FDA,DMF,CFDA,NDC,HMA	USP42-NF37;EP9.1;BP2019;KP Ⅹ;Martindale:The Extra Pharmacopoeia	079013,079014,079054,079056,079057,079060,090221,090284,203192	Others	Adrenergic Receptor	Neuronal Signaling	Alfuzosin HCl is an alpha1 receptor antagonist used to treat benign prostatic hyperplasia (BPH).	425.91	81403-68-1	85	199.57	85	199.57	http://selleckchem.com/products/Alfuzosin-hydrochloride.html	C19H28ClN5O4	Hydrochloride	N/A	Cl.COC1=C(OC)C=C2C(=NC(=NC2=C1)N(C)CCCNC(=O)C3CCCO3)N	1.8	6	2	8
S1415	Clopidogrel	1	a4	in 10mM DMSO	FDA,DMF,EMA,HMA,CFDA,NDC,PMDA	USP42-NF37;BP2019;KP Ⅹ;EP9.2;JP17;IP2010;Martindale:The Extra Pharmacopoeia	076273,076274,076999,077665,078004,078133,090307,090494,090540,090625,090844,091023,091216,201686,202266,202925,202928,203751,204165,204359,206376	Cardiovascular Disease	P2 Receptor	Neuronal Signaling	Clopidogrel is an oral, thienopyridine class antiplatelet agent.	419.9	120202-66-6	83	197.67	78	185.76	http://selleckchem.com/products/Clopidogrel-bisulfate.html	C16H18ClNO6S2	Sulfate	SR-25990C	COC(=O)C(N1CCC2=C(C1)C=CS2)C3=C(Cl)C=CC=C3.O[S](O)(=O)=O	3.128	2	0	4
S1425	Ranolazine 2HCl	1	c4	in 10mM DMSO	FDA,DMF,EMA,NDC	Martindale:The Extra Pharmacopoeia	201046,208174,208862,209081,210054,211291,211707	Cardiovascular Disease	Calcium Channel	Transmembrane Transporters	Ranolazine 2HCl is a calcium uptake inhibitor via the sodium/calcium channal, used to treat chronic angina.	500.46	95635-56-6	100	199.82	100	199.82	http://selleckchem.com/products/Ranolazine-dihydrochloride.html	C24H35Cl2N3O4	Dihydrochloride	RS-43285	Cl.Cl.COC1=CC=CC=C1OCC(O)CN2CCN(CC2)CC(=O)NC3=C(C)C=CC=C3C	3.755	3	2	9
S1426	Repaglinide	1	e4	in 10mM DMSO	FDA,DMF,EMA,HMA,CFDA,NDC,PMDA	USP42-NF37;BP2019;KP Ⅹ;EP9.2;Martindale:The Extra Pharmacopoeia	077571,077571,078555,090008,090252,,091517,201189,203820	Endocrinology/Metabolic Disease	Potassium Channel	Transmembrane Transporters	Repaglinide is a potassium channel blocker, which lowers blood glucose by stimulating the release of insulin from the pancreas, used the treatment of type II diabetes.	452.59	135062-02-1	91	201.06	<1		http://selleckchem.com/products/Repaglinide.html	C27H36N2O4	free base	AG-EE 623 ZW	CCOC1=C(C=CC(=C1)CC(=O)NC(CC(C)C)C2=CC=CC=C2N3CCCCC3)C(O)=O	5.307	3	1	10
S1430	Rolipram	1	g4	in 10mM DMSO	DMF	N/A	N/A	Neurological Disease	PDE	Metabolism	The PDE4 selective inhibitor, rolipram, inhibited immunopurified PDE4B and PDE4D activities similarly, with IC50 values of approx. 130 nM and 240 nM respectively an anti-inflammatory agent.	275.34	61413-54-5	55	199.75	<1		http://selleckchem.com/products/Rolipram.html	C16H21NO3	free base	ZK-62711, SB 95952	COC1=C(OC2CCCC2)C=C(C=C1)C3CNC(=O)C3	2.349	3	1	4
S1431	Sildenafil Citrate	1	i4	in 10mM DMSO	FDA,DMF,CFDA,NDC,PMDA,HMA	USP42-NF37;EP9.2;BP2019;IP2010;Martindale:The Extra Pharmacopoeia	077342,078380,091378,091379,091448,091479,200149,200165,201150,201171,202023,202025,202255,202503,202506,202597,202598,202659,203623,203814,203962,203963,203988,204882,204883,206401,207178,208494,210394,212051,212260	Others	PDE	Metabolism	Sildenafil Citrate, a selective inhibitor of cyclic guanosine monophosphate (cGMP)-specific phosphodiesterase type 5 (PDE5), is a well-tolerated and highly effective treatment for erectile dysfunction.	666.7	171599-83-0	20	30	<1		http://selleckchem.com/products/Sildenafil-citrate.html	C28H38N6O11S	Citrate	N/A	CCCC1=N[N](C)C2=C1N=C(NC2=O)C3=CC(=CC=C3OCC)[S](=O)(=O)N4CCN(C)CC4.OC(=O)CC(O)(CC(O)=O)C(O)=O	-2.107	9	1	12
S1432	Sumatriptan Succinate	1	k4	in 10mM DMSO	FDA,DMF,CFDA,NDC,PMDA,HMA	USP42-NF37;BP2019;EP9.2;IP2010;Martindale:The Extra Pharmacopoeia	076554,076572,076840,076847,076933,076976,077163,077332,077696,077744,077871,077907,078067,078241,078284,078295,078298,078318,078319,078327,078593,079123,079240,079242,090310,090314,090358,090495,090641,200183,200263,202758,203322	Neurological Disease	5-HT Receptor	Neuronal Signaling	Sumatriptan Succinate is a triptan sulfa drug containing a sulfonamide group for the treatment of migraine headaches.	413.49	103628-48-4	83	200.73	83	200.73	http://selleckchem.com/products/Sumatriptan-succinate.html	C18H27N3O6S	Succinate	GR 43175	CN[S](=O)(=O)CC1=CC=C2[NH]C=C(CCN(C)C)C2=C1.OC(=O)CCC(O)=O	-1.958	4	2	9
S1435	Tamsulosin hydrochloride	1	m4	in 10mM DMSO	FDA,DMF,CFDA,NDC,PMDA,HMA	USP42-NF37;BP2019;KP Ⅹ;EP9.2;JP17;Martindale:The Extra Pharmacopoeia	078015,078225,078801,078938,090377,090408,090931,202010,202433,204645,207405	Others	alpha1 adrenoreceptor	GPCG	Tamsulosin (Flomax) hydrochloride is an antagonist of alpha1A adrenoceptors in the prostate.	444.97	106463-17-6	89	200.01	<1		https://www.selleckchem.com/products/Tamsulosin-hydrochloride.html	C20H28N2O5S			CCOC1=C(OCCNC(C)CC2=CC=C(OC)C(=C2)[S](N)(=O)=O)C=CC=C1	2.719	5	2	11
S1436	Tianeptine sodium	1	o4	in 10mM DMSO	DMF,CFDA,HMA	BP2019;EP9.2;Martindale:The Extra Pharmacopoeia	N/A	Psychotic disorders	5-HT Receptor	Neuronal Signaling	Tianeptine sodium is a selective serotonin reuptake enhancer (SSRE), used for treating major depressive episodes.	458.93	30123-17-2	91	198.29	91	198.29	http://selleckchem.com/products/Tianeptine-sodium-salt.html	C21H24ClN2NaO4S	Sodium Salt	N/A	[Na+].CN1C2=C(C=CC=C2)C(NCCCCCCC([O-])=O)C3=CC=C(Cl)C=C3[S]1(=O)=O	2.453	2	1	8
S1437	Tizanidine HCl	1	a6	in 10mM DMSO	FDA,DMF,CFDA,NDC,PMDA,HMA	USP42-NF37;BP2019;EP9.2;JP17;IP2010;Martindale:The Extra Pharmacopoeia	076280,076281,076282,076283,076284,076286,076321,076347,076354,076371,076416,076533,078868,091283,091502,207170,207199,208187,208622,209605,210021,210267,211798,212196	Neurological Disease	Adrenergic Receptor	Neuronal Signaling	Tizanidine HCl is an α2-adrenergic receptor agonist and inhibits neurotransmitter release from CNS noradrenergic neurons.	290.17	64461-82-1	10	34.46	15	51.69	http://selleckchem.com/products/Tizanidine-hydrochloride.html	C9H9Cl2N5S	Hydrochloride	DS 103-282	Cl.ClC1=C(NC2=NCCN2)C3=NSN=C3C=C1	2.199	3	2	2
S1438	Topiramate	1	c6	in 10mM DMSO	FDA,DMF,EMA,HMA,CFDA,NDC,PMDA	USP42-NF37;IP2010;Martindale:The Extra Pharmacopoeia	076306,076311,076314,076315,076317,076327,076343,076448,076575,077627,077643,077733,077868,077905,078235,078410,078418,078462,078499,078637,078877,079153,079162,079206,090162,090278,090353,091185,205976,207382,210278	Neurological Disease	Carbonic Anhydrase	Metabolism	Topiramate is a mutil-targeted inhibitor, including voltage-gated sodium channel and calcium channel, AMPA/kainate receptor and carbonic anhydrase, used to treat epilepsy.	339.36	97240-79-4	68	200.38	<1		http://selleckchem.com/products/Topiramate.html	C12H21NO8S	free base	MCN 4853, RWJ 17021	CC1(C)OC2COC3(CO[S](N)(=O)=O)OC(C)(C)OC3C2O1	-1.932	6	1	3
S1439	Tranilast	1	e6	in 10mM DMSO	CFDA,PMDA	JP17;Martindale:The Extra Pharmacopoeia	N/A	Immunology	Immunology & Inflammation related	Immunology & Inflammation	Tranilast?is an antiallergic drug by inhibiting lipid mediator and cytokine release from inflammatory cells, used for the treatment of allergic disorders such as asthma, allergic rhinitis and atopic dermatitis.	327.33	53902-12-8	66	201.63	<1		http://selleckchem.com/products/Tranilast.html	C18H17NO5	free base	SB 252218	COC1=C(OC)C=C(\C=C\C(=O)NC2=CC=CC=C2C(O)=O)C=C1	2.679	4	1	6
S1441	Venlafaxine HCl	1	g6	in 10mM DMSO	FDA,DMF,CFDA,NDC,PMDA,HMA	USP42-NF37;BP2019;EP9.2;Martindale:The Extra Pharmacopoeia	022104,076565,076690,077166,077515,077653,078057,078087,078301,078421,078517,078554,078627,078789,078865,078932,079098,090027,090071,090174,090555,090899,091123,091272,200834,201272,202036,204889,205468,206250	Neurological Disease	5-HT Receptor	Neuronal Signaling	Venlafaxine HCl is an arylalkanolamine serotonin-norepinephrine reuptake inhibitor (SNRI), used to treat major depressive disorder (MDD), generalised anxiety disorder (GAD), panic disorder and social phobia.	313.86	99300-78-4	55.5	176.83	55.5	176.83	http://selleckchem.com/products/Venlafaxine-hydrochloride.html	C17H28ClNO2	Hydrochloride	N/A	Cl.COC1=CC=C(C=C1)C(CN(C)C)C2(O)CCCCC2	3.404	1	0	5
S1442	Voriconazole	1	i6	in 10mM DMSO	FDA,DMF,EMA,HMA,CFDA,NDC,PMDA	USP42-NF37;BP2019;EP9.2;JP17;Martindale:The Extra Pharmacopoeia	090547,090862,091658,200265,202361,203503,205034,206181,206398,206654,206747,206762,206799,206837,207049,207371,208562,208983,211661	Infection	P450 (e.g. CYP17)	Metabolism	Voriconazole is a new triazole derivative similar to fluconazole and itraconazole that acts by inhibiting fungal cytochrome P-450-dependent, 14-alpha-sterol demethylase-mediated synthesis of ergosterol.	349.31	137234-62-9	70	200.4	<1		http://selleckchem.com/products/Voriconazole.html	C16H14F3N5O	free base	UK-109496	CC(C1=NC=NC=C1F)C(O)(C[N]2C=NC=N2)C3=CC=C(F)C=C3F	2.071	4	0	5
S1443	Zileuton	1	k6	in 10mM DMSO	FDA,DMF,NDC	USP42-NF37;Martindale:The Extra Pharmacopoeia	204929	Inflammation	Lipoxygenase	Metabolism	Zileuton is an orally active inhibitor of 5-lipoxygenase, and thus inhibits leukotrienes (LTB4, LTC4, LTD4, and LTE4) formation, used to decrease the symptoms of asthma.	236.29	111406-87-2	47	198.91	<1		http://selleckchem.com/products/Zileuton.html	C11H12N2O2S	free base	A-64077	CC(N(O)C(N)=O)C1=CC2=CC=CC=C2S1	2.184	1	1	2
S1444	Ziprasidone HCl	1	m6	in 10mM DMSO	FDA,DMF,CFDA,NDC,HMA	USP42-NF37;BP2019;EP9.2;Martindale:The Extra Pharmacopoeia	077560,077561,077562,077565,090348,202395,204117,204375,208988	Neurological Disease	5-HT Receptor,Dopamine Receptor	Neuronal Signaling	Ziprasidone HCl is a novel and potent dopamine and serotonin (5-HT) receptor antagonist, used in the treatment of schizophrenia and bipolar disorder.	449.4	122883-93-6	90	200.27	<1		http://selleckchem.com/products/Ziprasidone-hydrochloride.html	C21H22Cl2N4OS	Hydrochloride	CP-88059	Cl.ClC1=CC2=C(CC(=O)N2)C=C1CCN3CCN(CC3)C4=NSC5=C4C=CC=C5	4.641	2	1	4
S1445	Zonisamide	1	o6	in 10mM DMSO	FDA,DMF,EMA,HMA,CFDA,NDC,PMDA	USP42-NF37;Martindale:The Extra Pharmacopoeia	077625,077634,077635,077636,077637,077639,077641,077642,077644,077645,077647,077648,077650,077651,077813,077869,077876	Neurological Disease	Sodium Channel	Transmembrane Transporters	Zonisamide is a voltage-dependent sodium channel and T-type calcium channel blocker, used as an antiepileptic drug.	212.23	68291-97-4	42	197.9	<1		http://selleckchem.com/products/Zonisamide.html	C8H8N2O3S	free base	CI-912	N[S](=O)(=O)CC1=NOC2=CC=CC=C12	0.411	4	1	2
S1453	Tipifarnib	1	a8	in 10mM DMSO	DMF	Martindale:The Extra Pharmacopoeia	N/A	Cancer	Transferase	Metabolism	Tipifarnib (R115777) is a potent and specific farnesyltransferase (FTase) inhibitor with IC50 of 0.6 nM, its anti-proliferative effects are most prominent in H-ras or N-ras mutant cells. Phase 3.	489.4	192185-72-1	14	28.61	<1		http://selleckchem.com/products/Tipifarnib(R115777).html	C27H22Cl2N4O	free base	R115777	C[N]1C=NC=C1C(N)(C2=CC=C(Cl)C=C2)C3=CC4=C(C=C3)N(C)C(=O)C=C4C5=CC(=CC=C5)Cl	4.808	2	1	4
S1457	Atazanavir Sulfate	1	c8	in 10mM DMSO	FDA,DMF,EMA,HMA,NDC	EP9.7;Ph.Int_6th;IP2010;Martindale:The Extra Pharmacopoeia	078785,091611,091673,200196,200626,204806,208177	Infection	HIV Protease	Proteases	Atazanavir Sulfate is a HIV protease inhibitor with Ki of 2.66 nM in a cell-free assay.	802.93	229975-97-7	104	129.53	<1		http://selleckchem.com/products/Atazanavir.html	C38H54N6O11S	Sulfate	BMS-232632	COC(=O)NC(C(=O)NC(CC1=CC=CC=C1)C(O)CN(CC2=CC=C(C=C2)C3=NC=CC=C3)NC(=O)C(NC(=O)OC)C(C)(C)C)C(C)(C)C.O[S](O)(=O)=O	4.083	7	5	18
S1458	VX-745	1	e8	in 10mM DMSO	DMF	N/A	N/A	Neurological Disease/Inflammation	p38 MAPK	MAPK	VX-745 is a potent and selective inhibitor of p38α with IC50 of 10 nM, 22-fold greater selectivity versus p38β and no inhibition to p38γ.	436.26	209410-46-8	15	34.38	<1		http://selleckchem.com/products/VX-745.html	C19H9Cl2F2N3OS	free base	N/A	FC1=CC(=C(SC2=NN3C=NC(=O)C(=C3C=C2)C4=C(Cl)C=CC=C4Cl)C=C1)F	5.342	3	0	3
S1465	Moxifloxacin HCl	1	g8	in 10mM DMSO	FDA,DMF,CFDA,NDC,PMDA,HMA	USP42-NF37;EP9.8;BP2019;Martindale:The Extra Pharmacopoeia	076938,077437,078073,090080,200160,202525,202632,202867,202916,204079,204635,205348,205572,206242,206295,207285,208682,209469	Infection/Inflammation	Topoisomerase	DNA Damage	Moxifloxacin is a fourth-generation synthetic fluoroquinolone antibacterial agent.	437.89	186826-86-8	87	198.68	60	137.02	http://selleckchem.com/products/Moxifloxacin.html	C21H25ClFN3O4	Hydrochloride	BAY12-8039 HCl	Cl.COC1=C2N(C=C(C(O)=O)C(=O)C2=CC(=C1N3CC4CCCNC4C3)F)C5CC5	-0.32	3	1	4
S1466	Calcitriol	1	i8	in 10mM DMSO	FDA,DMF,CFDA,NDC,PMDA,HMA	USP42-NF37;BP2019;KP Ⅹ;EP9.2;IP2010;Martindale:The Extra Pharmacopoeia	075746,075765,075766,075816,075823,075836,076206,076242,076917,077102,078066,091174,091356,203289,204556,209798,211030	Cancer/Metabolic Disease	Vitamin	Metabolism	Calcitriol is a nonselective vitamin D receptor activator/agonist(VDRA), exhibiting a 10-fold higher vitamin D receptor (VDR) binding affinity(IC50=0.4 nM) than the selective VDRA paricalcitol.	416.64	32222-06-3	83	199.21	<1		http://selleckchem.com/products/Calcitriol-(Rocaltrol).html	C27H44O3	Free Base	RO215535, Topitriol	CC(CCCC(C)(C)O)C1CCC2\C(CCCC12C)=C\C=C/3CC(O)CC(O)C3=C	5.179	0	2	6
S1467	Doxercalciferol	1	k8	in 10mM DMSO	FDA,DMF,NDC	USP42-NF37;Martindale:The Extra Pharmacopoeia	090040,091101,091333,091433,200926,201518,203929,208614,208974,208975,210801	Endocrinology/Metabolic Disease	Vitamin	Metabolism	Doxercalciferol is a synthetic vitamin D2 analog, suppressing parathyroid synthesis and secretion, used to treat secondary hyperparathyroidism and metabolic bone disease.	412.65	54573-75-0	83	201.14	<1		http://selleckchem.com/products/Doxercalciferol(Hectorol).html	C28H44O2	free base	1α-hydroxyvitamin D2	CC(C)C(C)/C=C/C(C)C1CCC2C(/CCCC12C)=C/C=C/3CC(O)CC(O)C3=C	6.337	0	2	5
S1468	Alfacalcidol	1	m8	in 10mM DMSO	CFDA,PMDA,HMA	BP2019;EP9.2;KP Ⅹ;Martindale:The Extra Pharmacopoeia	N/A	Metabolic Disease	Vitamin	Metabolism	Alfacalcidol is a non-selective VDR activator medication.	400.64	41294-56-8	80	199.68	<1		http://selleckchem.com/products/Alfacalcidol.html	C27H44O2	free base	N/A	CC(C)CCCC(C)C1CCC2/C(CCCC12C)=C\C=C3/CC(O)CC(O)C3=C	6.53	0	2	6
S1472	Safinamide Mesylate	1	o8	in 10mM DMSO	FDA,DMF,EMA,NDC	N/A	207145	Cardiovascular Disease/Neurological Disease	MAO	Metabolism	Safinamide Mesylate is mesylate salt of Safinamide, selectively and reversibly inhibits MAO-B with IC50 of 98 nM, exhibits 5918-fold selectivity against MAO-A. Phase 3.	398.45	202825-46-5	80	200.78	80	200.78	http://selleckchem.com/products/Safinamide-mesilate.html	C18H23FN2O5S	Mesylate	PNU-151774E,FCE28073	CC(NCC1=CC=C(OCC2=CC(=CC=C2)F)C=C1)C(N)=O.C[S](O)(=O)=O	2.064	2	2	7
S1482	Daclatasvir (BMS-790052)	1	a10	in 10mM DMSO	FDA,DMF,EMA,NDC,PMDA	N/A	206843	Infection	HCV Protease	Proteases	Daclatasvir (BMS-790052) is a highly selective inhibitor of HCV NS5A with EC50 of 9-50 pM, for a broad range of HCV replicon genotypes and the JFH-1 genotype 2a infectious virus in cell culture. Phase 3.	738.88	1009119-64-5	148	200.3	<1		http://selleckchem.com/products/BMS-790052.html	C40H50N8O6	free base	EBP883	COC(=O)NC(C(C)C)C(=O)N1CCCC1C2=NC=C([NH]2)C3=CC=C(C=C3)C4=CC=C(C=C4)C5=CN=C([NH]5)C6CCCN6C(=O)C(NC(=O)OC)C(C)C	5.048	8	4	13
S1483	Iloperidone	1	c10	in 10mM DMSO	FDA,DMF,EMA,NDC	USP	207231,207409	Neurological Disease	5-HT Receptor	Neuronal Signaling	Iloperidone is a dopamine (D2)/serotonin (5-HT2) receptor antagonist, used for the treatment of schizophrenia.	426.48	133454-47-4	27	63.31	<1		http://selleckchem.com/products/Iloperidone(Fanapt).html	C24H27FN2O4	free base	HP873	COC1=C(OCCCN2CCC(CC2)C3=NOC4=C3C=CC(=C4)F)C=CC(=C1)C(C)=O	4.016	5	0	8
S1485	HMN-214	1	e10	in 10mM DMSO	DMF	N/A	N/A	Cancer	PLK	Cell Cycle	HMN-214 is a prodrug of HMN-176, which alters the cellular spatial orientation of Plk1.	424.47	173529-46-9	12	28.27	<1		http://selleckchem.com/products/HMN-214.html	C22H20N2O5S	free base	N/A	COC1=CC=C(C=C1)[S](=O)(=O)N(C(C)=O)C2=C(C=CC=C2)\C=C\C3=CC=[N+]([O-])C=C3	2.282	4	0	6
S1488	Naratriptan HCl	1	g10	in 10mM DMSO	FDA,DMF,NDC,PMDA,HMA	USP42-NF37;Martindale:The Extra Pharmacopoeia	078751,090288,090381,091326,091373,091441,091552,200502,202431	Neurological Disease	5-HT Receptor	Neuronal Signaling	Naratriptan HCl is a triptan agent that is used for the treatment of migraine headaches.	371.93	143388-64-1	74	198.96	22	59.15	http://selleckchem.com/products/Naratriptan(Amerge).html	C17H26ClN3O2S	Hydrochloride	N/A	Cl.CN[S](=O)(=O)CCC1=CC=C2[NH]C=C(C3CCN(C)CC3)C2=C1	2.435	2	2	5
S1490	Ponatinib (AP24534)	1	i10	in 10mM DMSO	FDA,DMF,EMA,NDC,PMDA	N/A	203469	Cancer/Hematology	Bcr-Abl,FGFR,PDGFR,VEGFR	Angiogenesis	Ponatinib (AP24534) is a novel, potent multi-target inhibitor of Abl, PDGFRα, VEGFR2, FGFR1 and Src with IC50 of 0.37 nM, 1.1 nM, 1.5 nM, 2.2 nM and 5.4 nM in cell-free assays, respectively.	532.56	943319-70-8	30	56.33	<1		http://selleckchem.com/products/AP24534.html	C29H27F3N6O	free base	N/A	CN1CCN(CC1)CC2=C(C=C(NC(=O)C3=CC(=C(C)C=C3)C#CC4=CN=C5C=CC=N[N]45)C=C2)C(F)(F)F	4.884	3	1	7
S1491	Fludarabine	1	k10	in 10mM DMSO	FDA,DMF,CFDA,NDC,PMDA,HMA	USP42-NF37;BP2019;EP9.2;Martindale:The Extra Pharmacopoeia	022137,076349,076661,077790,078393,078544,078610,090724,200647,200648,203738	Cancer/Hematology	DNA/RNA Synthesis,STAT	JAK/STAT	Fludarabine is a STAT1 activation inhibitor which causes a specific depletion of STAT1 protein (and mRNA) but not of other STATs. Also a DNA synthesis inhibitor in vascular smooth muscle cells.	285.23	21679-14-1	57	199.84	<1		http://selleckchem.com/products/Fludarabine(Fludara).html	C10H12FN5O4	Free Base	FaraA, Fludarabinum	NC1=NC(=NC2=C1N=C[N]2C3OC(CO)C(O)C3O)F	-1.312	4	4	2
S1497	Pralatrexate	1	m10	in 10mM DMSO	FDA,DMF,EMA,NDC,PMDA	N/A	206167	Cancer	DHFR	Metabolism	Pralatrexate is an antifolate, and structurally a folate analog. Its IC50 is < 300 nM in some cell lines.	477.47	146464-95-1	28	58.64	<1		http://selleckchem.com/products/Pralatrexate(Folotyn).html	C23H23N7O5	free base	N/A	NC1=NC(=C2N=C(CC(CC#C)C3=CC=C(C=C3)C(=O)NC(CCC(O)=O)C(O)=O)C=NC2=N1)N	1.94	7	3	10
S1499	Cefaclor	1	o10	in 10mM DMSO	FDA,DMF,CFDA,NDC,PMDA,HMA	USP42-NF37;BP2019;EP9.2;JP17;IP2010;Martindale:The Extra Pharmacopoeia	062205,062206,064061,064070,064081,064085,064086,064087,064107,064110,064114,064115,064116,064145,064148,064155,064156,064164,064165,064166,064204,064205,064206,064207,065057,065058,065146,065350,065412	Infection	Anti-infection	Microbiology	Cefaclor is a cephalosporin antibiotic.	385.82	70356-03-5	11	28.51	<1		http://selleckchem.com/products/Cefaclor-(Ceclor).html	C15H16ClN3O5S	monohydrate	Cefachlor, Cefaclorum	O.NC(C(=O)NC1C2SCC(=C(N2C1=O)C(O)=O)Cl)C3=CC=CC=C3	-2.54	3	2	4
S1500	Betamethasone	1	a12	in 10mM DMSO	FDA,DMF,CFDA,NDC,PMDA,HMA	USP38-NF33;BP2013;JP16;IP2010;Martindale:The Extra Pharmacopoeia	085738	Angiology/Cancer/Hematology/Immunology/Inflammation	Glucocorticoid Receptor	Endocrinology & Hormones	Betamethasone is a glucocorticoid steroid with anti-inflammatory and immunosuppressive properties.	392.46	378-44-9	79	201.29	<1		http://selleckchem.com/products/Betamethasone-(Celestone).html	C22H29FO5	Free Base	NSC-39470, SCH-4831	CC1CC2C3CCC4=CC(=O)C=CC4(C)C3(F)C(O)CC2(C)C1(O)C(=O)CO	1.708	2	2	2
S1501	Mycophenolate Mofetil	1	c12	in 10mM DMSO	FDA,DMF,EMA,HMA,CFDA,NDC	USP42-NF37;BP2019;EP9.2;IP2010;Martindale:The Extra Pharmacopoeia	065379,065410,065413,065416,065433,065451,065457,065477,065491,065520,065521,090055,090111,090253,090419,090456,090464,090499,090606,090661,090762,091249,091315,200197,203005,204076, 204077,210181,210370	Inflammation	Dehydrogenase	Metabolism	Mycophenolate Mofetil is a non-competitive, selective and reversible inhibitor of inosine monophosphate dehydrogenase I/II with IC50 of 39 nM and 27 nM, respectively.	433.49	128794-94-5	86	198.39	<1		http://selleckchem.com/products/Mycophenolate-mofetil-(CellCept).html	C23H31NO7	free base	RS61443	COC1=C(C)C2=C(C(=O)OC2)C(=C1C\C=C(C)\CCC(=O)OCCN3CCOCC3)O	3.209	6	1	10
S1504	Dyphylline	1	e12	in 10mM DMSO	FDA,DMF	USP42-NF37	084514,084751,084566,007794,009088	Cardiovascular Disease/Immunology/Inflammation/Respiratory Disease	PDE	Metabolism	Dyphylline is a xanthine derivative with bronchodilator and vasodilator effects.	254.24	479-18-5	51	200.6	51	200.6	http://selleckchem.com/products/Dyphylline(Dilor).html	C10H14N4O4	free base	Diprophylline	CN1C(=O)N(C)C2=C([N](CC(O)CO)C=N2)C1=O	-1.151	3	2	3
S1505	Aztreonam	1	g12	in 10mM DMSO	FDA,DMF,EMA,CFDA,NDC,PMDA	USP42-NF37;KP Ⅹ;JP17;Martindale:The Extra Pharmacopoeia	065286,065439	Infection	Anti-infection	Microbiology	Aztreonam is a synthetic monocyclic beta-lactam antibiotic, used to treat Gram-negative aerobic bacteria infection.	435.43	78110-38-0	87	199.8	11	25.26	http://selleckchem.com/products/Aztreonam(Azactam).html	C13H17N5O8S2	free base	SQ 26776	CC1C(NC(=O)\C(=N/OC(C)(C)C(O)=O)C2=CSC(=N2)N)C(=O)N1[S](O)(=O)=O	-1.035	6	2	7
S1508	Alprostadil	1	i12	in 10mM DMSO	FDA,DMF,CFDA,NDC,PMDA,HMA	USP42-NF37;BP2019;EP9.2;KP Ⅹ;JP17;Martindale:The Extra Pharmacopoeia	074815,075196	Angiology/Endocrinology	Immunology & Inflammation related	Immunology & Inflammation	Alprostadil is used as a drug in the treatment of erectile dysfunction and has vasodilatory properties. It is a Prostaglandin Analog and Prostaglandin E1 Agonist.	354.48	745-65-3	71	200.29	<1		http://selleckchem.com/products/Alprostadil(Caverject).html	C20H34O5	free base	Prostaglandin-E1	CCCCCC(O)/C=C/C1C(O)CC(=O)C1CCCCCCC(O)=O	3.644	2	2	13
S1511	Lactulose	1	k12	in 10mM DMSO	FDA,DMF,CFDA,NDC,PMDA,HMA	USP42-NF37;EP9.8;BP2019;KP Ⅹ;JP17;IP2010;Martindale:The Extra Pharmacopoeia	017906,071841,072029,073160,073590,073591,074076,074077,074138,074602,074623,074712,075911,075993,076645,078430,090426,090502,090503,203762,207786,209517	Others	Others	Others	Lactulose, a disaccharide composed of galactose and fructose, is a stimulator of health-promoting bacterium growth in the gastrointestinal tract, used to treat chronic constipation and hepatic encephalopathy.	342.3	4618-18-2	68	198.66	68	198.66	http://selleckchem.com/products/Lactulose(Enulose).html	C12H22O11	free base	N/A	OCC(O)C(OC1OC(CO)C(O)C(O)C1O)C(O)C(=O)CO	-4.621	3	8	8
S1512	Tadalafil	1	m12	in 10mM DMSO	FDA,DMF,EMA,HMA,CFDA,NDC	USP42-NF37;BP2019;EP9.2;Martindale:The Extra Pharmacopoeia	090141,200630,204809,205885,206285,206286,206693,206956,206957,208824,208934,209167,209250,209539,209654,209744,209907,209908,210069,210145,210255,210392,210420,210567,210572,211335,211839,212062	Cardiovascular Disease	PDE	Metabolism	Tadalafil is a PDE-5 inhibitor with IC50 of 1.8 nM in a cell-free assay. Tadalafil is at least 9000 times more selective for PDE5 than most of the other families of PDEs, with the exception of PDE11. It can partial inhibits PDE11	389.4	171596-29-5	78	200.31	<1		http://selleckchem.com/products/Tadalafil(Cialis).html	C22H19N3O4	free base	IC351	CN1CC(=O)N2C(CC3=C([NH]C4=C3C=CC=C4)C2C5=CC=C6OCOC6=C5)C1=O	2.183	4	1	1
S1514	Cyclosporine	1	o12	in 10mM DMSO	FDA,DMF,NDC	USP42-NF37	065004,065017,065025,065040,065044,065054,065078,065110,065133,065151,065167	Cancer/Hematology/Inflammation	phosphatase,Immunology & Inflammation related	Others	Cyclosporine is a calcineurin phosphatase pathway inhibitor, used as an immunosuppressant drug to prevent rejection in organ transplantation.	1202.61	79217-60-0	100	83.15	<1		http://selleckchem.com/products/Cyclosporine.html	C62H111N11O12	free base	N/A	CCC1NC(=O)C(C(O)C(C)C\C=C\C)N(C)C(=O)C(C(C)C)N(C)C(=O)C(CC(C)C)N(C)C(=O)C(CC(C)C)N(C)C(=O)C(C)NC(=O)C(C)NC(=O)C(CC(C)C)N(C)C(=O)C(NC(=O)C(CC(C)C)N(C)C(=O)CN(C)C1=O)C(C)C	4.333	11	5	15
S1517	Natamycin	1	a14	in 10mM DMSO	FDA,DMF,CFDA,NDC	USP42-NF37;Martindale:The Extra Pharmacopoeia	050514	Infection/Ophthalmology	Anti-infection	Microbiology	Natamycin, a natural and versatile anti-fungal agent during fermentation by the bacterium Streptomyces natalensis, commonly found in soil with little to no flavour interference	665.73	7681-93-8	7	10.51	<1		http://selleckchem.com/products/Natamycin(Pimaricin).html	C33H47NO13	free base	Pimaricin	CC1C/C=C/C=C/C=C/C=C/C(CC2OC(O)(CC(O)CC3OC3/C=C/C(=O)O1)CC(O)C2C(O)=O)OC4OC(C)C(O)C(N)C4O	-2.824	7	5	3
S1526	Quizartinib (AC220)	1	c14	in 10mM DMSO	EMA, PMDA	N/A	N/A	Others	FLT3	Angiogenesis	Quizartinib (AC220) is a second-generation FLT3 inhibitor for Flt3(ITD/WT) with IC50 of 1.1 nM/4.2 nM in MV4-11 and RS411 cells, respectively, 10-fold more selective for Flt3 than KIT, PDGFRα, PDGFRβ, RET, and CSF-1R. Phase 3.	560.67	950769-58-1	33	58.86	<1		http://selleckchem.com/products/AC-220.html	C29H32N6O4S	free base	N/A	CC(C)(C)C1=CC(=NO1)NC(=O)NC2=CC=C(C=C2)C3=C[N]4C(=N3)SC5=CC(=CC=C45)OCCN6CCOCC6	5.064	6	2	8
S1538	Telaprevir (VX-950)	1	e14	in 10mM DMSO	FDA,DMF,EMA	N/A	201917	Infection	HCV Protease	Proteases	Telaprevir (VX-950) is an HCV NS3-4A serine protease inhibitor with IC50 of 0.35 μM.	679.85	402957-28-2	136	200.04	<1		http://selleckchem.com/products/Telaprevir(VX-950).html	C36H53N7O6	free base	LY-570310, MP-424	CCCC(NC(=O)C1C2CCCC2CN1C(=O)C(NC(=O)C(NC(=O)C3=NC=CN=C3)C4CCCCC4)C(C)(C)C)C(=O)C(=O)NC5CC5	2.685	8	4	14
S1540	Saxagliptin	1	g14	in 10mM DMSO	FDA,DMF,EMA,CFDA,NDC	N/A	205902,205941,205959,205972,205994,206020	Endocrinology/Metabolic Disease	DPP-4	Proteases	Saxagliptin is a selective and reversible DPP4 inhibitor with IC50 of 26 nM.	315.41	361442-04-8	63	199.74	63	199.74	http://selleckchem.com/products/Saxagliptin(Onglyza).html	C18H25N3O2	Free Base	BMS-477118	NC(C(=O)N1C(CC2CC12)C#N)[C]34CC5[CH2]C(C[C](O)(C5)C3)C4	0.275	1	1	2
S1547	Febuxostat	1	i14	in 10mM DMSO	FDA,DMF,EMA,HMA,CFDA,NDC,PMDA	Martindale:The Extra Pharmacopoeia	205385,205406,205414,205421,205443,206266,207293,210461,211339,211837	Endocrinology/Metabolic Disease	ROS	Immunology & Inflammation	Febuxostat is a selective xanthine oxidase inhibitor with Ki of 0.6 nM.	316.37	144060-53-7	63	199.13	<1		http://selleckchem.com/products/Febuxostat(Uloric).html	C16H16N2O3S	free base	TMX 67, TEI-6720	CC(C)COC1=C(C=C(C=C1)C2=NC(=C(S2)C(O)=O)C)C#N	3.468	3	0	5
S1548	Dapagliflozin	1	k14	in 10mM DMSO	FDA,DMF,EMA,NDC,PMDA	N/A	211156,211439,211442,211541	Endocrinology/Metabolic Disease	SGLT	GPCR & G Protein	Dapagliflozin is a potent and selective hSGLT2 inhibitor with EC50 of 1.1 nM, exhibiting 1200-fold selectivity over hSGLT1. Phase 4.	408.87	461432-26-8	82	200.55	<1		http://selleckchem.com/products/Dapagliflozin.html	C21H25ClO6	free base	BMS-512148	CCOC1=CC=C(CC2=CC(=CC=C2Cl)C3OC(CO)C(O)C(O)C3O)C=C1	2.409	2	4	6
S1549	Nebivolol HCl	1	m14	in 10mM DMSO	FDA,DMF,NDC,HMA	USP;IP2010;Martindale:The Extra Pharmacopoeia	203659,203683,203741,203821,203828,203966,206729	Cardiovascular Disease	Adrenergic Receptor	Neuronal Signaling	Nebivolol HCl selectively inhibits β1-adrenoceptor with IC50 of 0.8 nM.	441.9	152520-56-4	88	199.14	<1		http://selleckchem.com/products/Nebivolol(Bystolic).html	C22H26ClF2NO4	Hydrochloride	R-65824	Cl.OC(CNCC(O)C1CCC2=C(O1)C=CC(=C2)F)C3CCC4=CC(=CC=C4O3)F	3.939	2	3	6
S1550	Pimobendan	1	o14	in 10mM DMSO	PMDA	USP42-NF37 ;BP2019;EP9.5;Martindale:The Extra Pharmacopoeia	N/A	Cardiovascular Disease	PDE	Metabolism	Pimobendan is a selective inhibitor of PDE3 with IC50 of 0.32 μM.	334.37	74150-27-9	67	200.38	<1		http://selleckchem.com/products/Pimobendan(Vetmedin).html	C19H18N4O2	free base	UD-CG 115 BS	COC1=CC=C(C=C1)C2=NC3=CC(=CC=C3[NH]2)C4=NNC(=O)CC4C	2.936	4	2	3
S1553	ABT-492(Delafloxacin, RX-3341, WQ-3034)	1	a16	in 10mM DMSO	FDA,EMA	USP40-NF35,IP2010,JP16	208610	Infection	Others	Others	ABT-492 is a new fluoroquinolone against 155 aerobic and 171 anaerobic pathogens.	440.76	189279-58-1, 339591-82-1 (sodium salt)	88	199.66	<1		http://www.selleck.cn/products/ABT-492.html	C18H12ClF3N4O4	free base	WQ-3034, ABT492	NC1=C(F)C=C(F)C(=N1)N2C=C(C(O)=O)C(=O)C3=CC(=C(N4CC(O)C4)C(=C23)Cl)F	2.682	3	2	3
S1565	VX-809 (Lumacaftor)	1	c16	in 10mM DMSO	FDA,EMA,NDC	N/A	206038,211358	Others	CFTR	Transmembrane Transporters	VX-809 (Lumacaftor) acts to correct CFTR mutations common in cystic fibrosis by increasing mutant CFTR (F508del-CFTR) maturation,EC50 of 0.1 μM in fisher rat thyroid cells. Phase 3.	452.41	936727-05-8	90	198.93	<1		http://selleckchem.com/products/VX-809.html	C24H18F2N2O5	free base	VRT 826809	CC1=C(N=C(NC(=O)C2(CC2)C3=CC4=C(OC(F)(F)O4)C=C3)C=C1)C5=CC=CC(=C5)C(O)=O	6.411	5	1	5
S1567	Pomalidomide	1	e16	in 10mM DMSO	FDA,EMA,NDC,PMDA	N/A	204026	Angiology/Cancer	TNF-alpha	Apoptosis	Pomalidomide inhibits LPS-induced TNF-α release with IC50 of 13 nM in PBMCs.	273.24	19171-19-8	54	197.63	<1		http://selleckchem.com/products/Pomalidomide(CC-4047).html	C13H11N3O4	free base	CC-4047	NC1=C2C(=O)N(C3CCC(=O)NC3=O)C(=O)C2=CC=C1	-0.65	4	2	1
S1569	Tazarotene	1	g16	in 10mM DMSO	FDA,DMF,CFDA,NDC,HMA	Martindale:The Extra Pharmacopoeia	208258,208662,211175	Inflammation	Retinoid Receptor	Metabolism	Tazarotene is a retinoid prodrug of tazarotenic acid, which is a RAR agonist, used to treat psoriasis, acne, and sun damaged skin.	351.46	118292-40-3	10	28.45	<1		http://selleckchem.com/products/Tazarotene(Avage).html	C21H21NO2S	free base	AGN190168	CCOC(=O)C1=CN=C(C=C1)C#CC2=CC3=C(SCCC3(C)C)C=C2	4.951	3	0	5
S1573	Fasudil (HA-1077) HCl	1	i16	in 10mM DMSO	DMF,CFDA,PMDA	Martindale:The Extra Pharmacopoeia	N/A	Cardiovascular Disease	Autophagy,ROCK	Cell Cycle	Fasudil(HA-1077), a potent and selective inhibitor of Rho kinase, displays less potent inhibiton over PKA, PKG, PKC and MLCK with Ki of 1.6, 1.6, 3.3, and 36 μM in cell-free assays, respectively.	327.83	105628-07-7	5	15.25	65	198.27	http://selleckchem.com/products/Fasudil-HCl(HA-1077).html	C14H18ClN3O2S	Hydrochloride	N/A	Cl.O=[S](=O)(N1CCCNCC1)C2=C3C=CN=CC3=CC=C2	0.57	3	1	2
S1576	Sulfasalazine	1	k16	in 10mM DMSO	FDA,DMF,CFDA,NDC,HMA	USP42-NF37 ;EP9.2;BP2019;KP Ⅹ;Ph.Int_6th;Martindale:The Extra Pharmacopoeia	040349,075339,080197,084964,085828,086184,087197,088052,089339,089590	Infection/Inflammation	Immunology & Inflammation related	Immunology & Inflammation	Sulfasalazine is a sulfa derivative of mesalazine, used as an anti-inflammatory agent to treat bowel disease and rheumatoid arthritis.	398.39	599-79-1	80	200.81	<1		http://selleckchem.com/products/Sulfasalazine(Azulfidine).html	C18H14N4O5S	free base	Azulfidine	OC(=O)C1=C(O)C=CC(=C1)N=NC2=CC=C(C=C2)[S](=O)(=O)NC3=CC=CC=N3	3.463	6	2	6
S1578	Candesartan	1	m16	in 10mM DMSO	FDA,DMF,CFDA,NDC,PMDA,HMA	USP42-NF37;Martindale:The Extra Pharmacopoeia	078702,091390,202079,203813,209119,210302	Cardiovascular Disease	RAAS	Endocrinology & Hormones	Candesartan is an angiotensin II receptor antagonist with IC50 of 0.26 nM.	440.45	139481-59-7	88	199.8	<1		http://selleckchem.com/products/Candesartan(Atacand).html	C24H20N6O3	free base	CV-11974	CCOC1=NC2=C([N]1CC3=CC=C(C=C3)C4=CC=CC=C4C5=N[NH]N=N5)C(=CC=C2)C(O)=O	4.626	6	1	7
S1591	Bestatin	1	o16	in 10mM DMSO	CFDA, PMDA	Martindale the Extra Pharmacopoei, JP17	N/A	Others	Immunology & Inflamm	Immunology & Inflammation	Bestatin is a potent <b>aminopeptidase-B</b> and <b>leukotriene (LT) A4 hydrolase</b> inhibitor, used in the treatment of acute myelocytic leukemia.	308.37	58970-76-6	4	12.97	<1		http://www.selleck.cn/products/Ubenimex(Bestatin).html	C16H24N2O4	Free Base	Ubenimex	CC(C)CC(NC(=O)C(O)C(N)CC1=CC=CC=C1)C(O)=O	-1.34	2	3	8
S1593	Apixaban	1	a18	in 10mM DMSO	FDA,DMF,EMA,CFDA,NDC,PMDA	N/A	209845,209944,210013,210026,210119,210156	Cardiovascular Disease	Factor Xa	Metabolism	Apixaban is a highly selective, reversible inhibitor of Factor Xa with Ki of 0.08 nM and 0.17 nM in human and rabbit, respectively.	459.5	503612-47-3	18	39.17	<1		http://selleckchem.com/products/Apixaban(BMS-562247-01).html	C25H25N5O4	free base	BMS 562247-01	COC1=CC=C(C=C1)[N]2N=C(C(N)=O)C3=C2C(=O)N(CC3)C4=CC=C(C=C4)N5CCCCC5=O	2.865	5	1	5
S1601	Reserpine	1	c18	in 10mM DMSO	FDA,DMF,CFDA,PMDA	USP42-NF37;BP2019;KP Ⅹ;EP9.2;JP17;IP2010;Martindale:The Extra Pharmacopoeia	009627,009663,009667,009838,009859,010441,011185,080393,080446,080457,080492,080525,080582,080637,080679,080721,080723,080749,080753,080975,083058,083145,084663,084974,085207,085401,085775,086117,089019,089020	Cardiovascular Disease/Neurological Disease	Others	Others	Reserpine is an inhibitor of multidrug efflux pumps, used as an antipsychotic and antihypertensive drug.	608.68	50-55-5	13	21.36	<1		http://selleckchem.com/products/Reserpine.html	C33H40N2O9	free base	N/A	COC1C(CC2CN3CCC4=C([NH]C5=C4C=CC(=C5)OC)C3CC2C1C(=O)OC)OC(=O)C6=CC(=C(OC)C(=C6)OC)OC	4.242	9	1	10
S1603	Furosemide	1	e18	in 10mM DMSO	FDA,DMF,CFDA,NDC,PMDA,HMA	USP42-NF37;EP9.4;KP Ⅹ;BP2019;Ph.Int_6th;JP17;IP2010	018025,018267,018369,018370,018413,018415,018419,018420,018487,018507,018569,018579,018667,018670,018750,018753,018790,018823,018868,018902,019036,070014,070017,070019,070023,070043,070078,070082,070086,070095,070096,070100,070412,070413,070433,070434,070449,070450,070528,070578,070604,070655,071379,071439,071594,072080,074017,074337,075241,076796,077293,077941,078010,091258,202747,203428,207552,…	Cardiovascular Disease/Metabolic Disease	Sodium Channel	Transmembrane Transporters	Furosemide is a potent NKCC2 (Na-K-2Cl symporter) inhibitor, used in the treatment of congestive heart failure and edema.	330.74	54-31-9	66	199.55	<1		http://selleckchem.com/products/Furosemide(Lasix).html	C12H11ClN2O5S	free base	N/A	N[S](=O)(=O)C1=C(Cl)C=C(NCC2=CC=CO2)C(=C1)C(O)=O	1.403	4	2	5
S1604	Olmesartan Medoxomil	1	g18	in 10mM DMSO	FDA,DMF,CFDA,NDC,PMDA,HMA	USP42-NF37;BP2019;EP9.2;JP17;Martindale:The Extra Pharmacopoeia	078276,090237,091079,202375,203012,203281,204798,204814,205192,205482,206631,206763,207480,207662,208130,210552,211049	Cardiovascular Disease	RAAS	Endocrinology & Hormones	Olmesartan Medoxomil (CS-866) is a selective angiotensin II type 1 (AT(1)) receptor antagonist, used in the treatment of high blood pressure.	558.59	144689-63-4	89	159.33	<1		http://selleckchem.com/products/olmesartan-medoxomil-Benicar.html	C29H30N6O6	free base	CS-866	CCCC1=NC(=C([N]1CC2=CC=C(C=C2)C3=CC=CC=C3C4=N[NH]N=N4)C(=O)OCC5=C(C)OC(=O)O5)C(C)(C)O	4.814	9	1	11
S1605	Cefdinir	1	i18	in 10mM DMSO	FDA,DMF,CFDA,NDC,PMDA,HMA	USP42-NF37;KP Ⅹ;JP17;Martindale:The Extra Pharmacopoeia	065259,065264,065330,065332,065337,065368,065418,065429,065434,065473	Infection	Anti-infection	Microbiology	Cefdinir is an oral cephalosporin antibiotic, used to treat bacterial infections in many different parts of the body.	395.41	91832-40-5	79	199.79	<1		http://selleckchem.com/products/Cefdinir(Omnicef).html	C14H13N5O5S2	free base	FK 482, PD 134393, CI-983	NC1=NC(=CS1)C(=N/O)/C(=O)NC2C3SCC(=C(N3C2=O)C(O)=O)C=C	-0.172	5	2	5
S1606	Clotrimazole	1	k18	in 10mM DMSO	FDA,DMF,CFDA,NDC,PMDA,HMA	USP42-NF37;BP2019;EP9.2;KP Ⅹ;JP17;IP2010;Martindale:The Extra Pharmacopoeia	072640,072641,073306,074165,074580,076387,076763,078338,090219,209815	Infection	Anti-infection	Microbiology	Clotrimazole alters the permeability of the fungal cell wall by inhibiting the biosynthesis of ergosterol, used in the treatment of fungal infections.	344.84	23593-75-1	11	31.9	<1		http://selleckchem.com/products/Clotrimazole(Canesten).html	C22H17ClN2	free base	BAY b 5097, FB 5097	ClC1=C(C=CC=C1)C([N]2C=CN=C2)(C3=CC=CC=C3)C4=CC=CC=C4	5.222	1	0	4
S1607	Rizatriptan Benzoate	1	m18	in 10mM DMSO	FDA,DMF,CFDA,NDC,PMDA,HMA	USP42-NF37;BP2019;EP9.2;Martindale:The Extra Pharmacopoeia	077263,077526,078173,078739,079230,200482,201914,201967,201993,202047,202244,202477,202490,203062,203146,203147,203252,203269,203334,203478,204090,204339,204722,207835,207836	Neurological Disease	5-HT Receptor	Neuronal Signaling	Rizatriptan Benzoate is an agonist at serotonin 5-HT1B and 5-HT1D receptors, used to treat acute migraine attacks.	391.47	145202-66-0	20	51.09	46	117.51	http://selleckchem.com/products/Rizatriptan-Benzoate(Maxalt).html	C22H25N5O2	Benzoate	MK-462 Benzoate	CN(C)CCC1=C[NH]C2=C1C=C(C[N]3C=NC=N3)C=C2.OC(=O)C4=CC=CC=C4	0.492	3	1	6
S1608	Pyridostigmine Bromide	1	o18	in 10mM DMSO	FDA,DMF,CFDA,NDC,PMDA,HMA	USP42-NF37;BP2019;KP Ⅹ;EP9.2;JP17;Martindale:The Extra Pharmacopoeia	020414,040457,040502,040512,089572,203184,204737,205464,205650,211181,211694	Neurological Disease	AChR	Neuronal Signaling	Pyridostigmine Bromide is a parasympathomimetic and a reversible cholinesterase inhibitor.	261.12	101-26-8	52	199.14	52	199.14	http://selleckchem.com/products/Pyridostigmine-Bromide(Mestinon).html	C9H13BrN2O2	Bromide	N/A	[Br-].CN(C)C(=O)OC1=C[N+](=CC=C1)C	-1.014	2	0	2
S1609	Methimazole	1	a20	in 10mM DMSO	FDA,DMF,NDC	USP42-NF37;BP2019;IP2010	040350,040411,040547,040619,040734,040870,202068	Endocrinology/Metabolic Disease	Others	Others	Methimazole is an antithyroid medicine.	114.17	60-56-0	23	201.45	23	201.45	http://selleckchem.com/products/Methimazole(Tapazole).html	C4H6N2S	free base	Tapazole, Thiamazole	CN1C=CNC1=S	0.414	0	1	0
S1610	Metolazone	1	c20	in 10mM DMSO	FDA,DMF,NDC,HMA	USP42-NF37;BP2019;EP9.2;Martindale:The Extra Pharmacopoeia	075543,076466,076482,076600,076698,076732,076833,076891	Cardiovascular Disease	Others	Others	Metolazone is a diuretic that primarily used to treat congestive heart failure and high blood pressure.	365.83	17560-51-9	73	199.55	<1		http://selleckchem.com/products/Metolazone(Zaroxolyn).html	C16H16ClN3O3S	free base	SR 720-22	CC1NC2=CC(=C(C=C2C(=O)N1C3=CC=CC=C3C)[S](N)(=O)=O)Cl	2.463	3	2	2
S1611	Cefoperazone	1	e20	in 10mM DMSO	FDA,DMF,CFDA	USP42-NF37;BP2019;KP Ⅹ;EP9.2;JP17;IP2010;Martindale:The Extra Pharmacopoeia	050551,063333	Infection	Anti-infection	Microbiology	Cefoperazone is a cephalosporin antibiotic for inhibition of rMrp2-mediated [3H]E217βG uptake with IC50 of 199 μM.	645.67	62893-19-0	100	154.88	<1		http://selleckchem.com/products/cefoperazone-cefobid.html	C25H27N9O8S2	free base	N/A	CCN1CCN(C(=O)NC(C(=O)NC2C3SCC(=C(N3C2=O)C(O)=O)CSC4=NN=N[N]4C)C5=CC=C(O)C=C5)C(=O)C1=O	-0.792	9	3	9
S1613	Silodosin	1	g20	in 10mM DMSO	FDA,DMF,EMA,HMA,CFDA,NDC,PMDA	JP17;Martindale:The Extra Pharmacopoeia	204726,206541,209745,210626,210687,211060,211166	Others	Adrenergic Receptor	Neuronal Signaling	Silodosin is a highly selective α1A-adrenoceptor antagonist, used in treatment of benign prostatic hyperplasia.	495.53	160970-54-7	99	199.79	<1		http://selleckchem.com/products/Silodosin(Rapaflo).html	C25H32F3N3O4	free base	KAD 3213, KMD 3213	CC(CC1=CC2=C(N(CCCO)CC2)C(=C1)C(N)=O)NCCOC3=CC=CC=C3OCC(F)(F)F	3.451	3	3	14
S1614	Riluzole	1	i20	in 10mM DMSO	FDA,DMF,EMA,HMA,CFDA,NDC,PMDA	USP42-NF37;Martindale:The Extra Pharmacopoeia	076173,091300,091394,091417,203042,204048,204430	Neurological Disease	GluR,Sodium Channel	Transmembrane Transporters	Riluzole is a glutamate release inhibitor with neuroprotective, anticonvulsant, anxiolytic and anesthetic qualities.	234.2	1744-22-5	46	196.41	<1		http://selleckchem.com/products/Riluzole(Rilutek).html	C8H5F3N2OS	free base	RP-54274, PK 26124	NC1=NC2=C(S1)C=C(OC(F)(F)F)C=C2	3.828	2	1	2
S1618	Sulfameter	1	k20	in 10mM DMSO	FDA	N/A	016000	Infection	DHFR	Metabolism	Sulfameter is a long-acting sulfonamide antibacterial.	280.3	651-06-9	56	199.79	<1		http://selleckchem.com/products/Sulfameter(Bayrena).html	C11H12N4O3S	free base	N/A	COC1=CN=C(N[S](=O)(=O)C2=CC=C(N)C=C2)N=C1	0.297	5	2	4
S1619	Prilocaine	1	m20	in 10mM DMSO	FDA,DMF,EMA,HMA,CFDA,NDC	USP42-NF37;EP9.4;BP2019;Martindale:The Extra Pharmacopoeia	079235	Neurological Disease	Sodium Channel	Transmembrane Transporters	Prilocaine is a local anesthetic of the amino amide type. It acts on sodium channels on the neuronal cell membrane, limiting the spread of seizure activity and reducing seizure propagation.	220.31	721-50-6	44	199.72	<1		http://selleckchem.com/products/Prilocaine.html	C13H20N2O	free base	NSC 40027	CCCNC(C)C(=O)NC1=C(C)C=CC=C1	2.263	1	2	5
S1620	Darunavir Ethanolate	1	o20	in 10mM DMSO	FDA,DMF,EMA,HMA,NDC	Martindale:The Extra Pharmacopoeia	202073,202083,202118,202118,207189	Infection	HIV Protease	Proteases	Darunavir Ethanolate (DRV) is a nonpeptidic HIV protease inhibitor, used to treat HIV infection.	593.73	635728-49-3	100	168.43	<1		http://selleckchem.com/products/Darunavir-Ethanolate(Prezista).html	C29H43N3O8S	Ethanolate	TMC-114, UIC 94017	CCO.CC(C)CN(CC(O)C(CC1=CC=CC=C1)NC(=O)OC2COC3OCCC23)[S](=O)(=O)C4=CC=C(N)C=C4	2.622	6	4	12
S1622	Prednisone	1	a22	in 10mM DMSO	FDA,DMF,CFDA,NDC,HMA	USP42-NF37;EP9.3;BP2019;IP2010;Martindale:The Extra Pharmacopoeia	017109,040256,040362,040392,040538,040581,040584,040611,040890,080209,080232,080237,080279,080283,080292,080300,080301,080306,080320,080321,080328,080334,080336,080343,080350,080352,080353,080356,080359,080371,080397,080491,080506,080514,080563,080701,080782,083059,083676,083677,083807,084122,084133,084134,084236,084275,084283,084341,084417,084440,084634,084662,084774,084913,085084,085115,085151,…	Cancer/Hematology/Immunology/Inflammation	Glucocorticoid Receptor,Immunology & Inflammation related	Endocrinology & Hormones	Prednisone (Adasone) is a synthetic corticosteroid agent that is particularly effective as an immunosuppressant compound.	358.43	53-03-2	71	198.09	<1		http://selleckchem.com/products/Prednisone.html	C21H26O5	free base	N/A	CC12CC(=O)C3C(CCC4=CC(=O)C=CC34C)C1CCC2(O)C(=O)CO	1.217	3	1	2
S1623	Acetylcysteine	1	c22	in 10mM DMSO	FDA,DMF,CFDA,NDC,PMDA,HMA	USP42-NF37;BP2019;KP Ⅹ;EP9.2;JP17;Martindale:The Extra Pharmacopoeia	071364,071365,071740,071741,072323,072324,072489,072547,072621,072622,073664,074037,091684,200644,03173,203624,203853,204674,207358,208166	Inflammation/Respiratory Disease	TNF-alpha,ROS	Apoptosis	Acetylcysteine(N-acetyl-l-cysteine) is a ROS(reactive oxygen species) inhibitor that antagonizes the activity of proteasome inhibitors. It is also a tumor necrosis factor production inhibitor, used mainly as a mucolytic, protects against acetaminophen overdose-induced hepatotoxicity by maintaining or restoring hepatic concentrations of glutathione.	163.19	616-91-1	33	202.22	33	202.22	http://selleckchem.com/products/acetylcysteine.html	C5H9NO3S	free base	N/A	CC(=O)NC(CS)C(O)=O	-0.578	2	1	3
S1625	Ethinyl Estradiol	1	e22	in 10mM DMSO	FDA,DMF,EMA,HMA,NDC	USP42-NF37;BP2019;EP9.2;KP Ⅹ;Ph.Int_6th;JP17;IP2010	077182	Cancer/Endocrinology	Estrogen/progestogen Receptor	Endocrinology & Hormones	Ethinyl Estradiol is an orally bio-active estrogen used in almost all modern formulations of combined oral contraceptive pills.	296.4	57-63-6	59	199.06	<1		http://selleckchem.com/products/Ethinyl-Estradiol.html	C20H24O2	free base	N/A	CC12CCC3C(CCC4=CC(=CC=C34)O)C1CCC2(O)C#C	4.886	0	1	0
S1626	Naproxen Sodium	1	g22	in 10mM DMSO	FDA,DMF,CFDA,NDC,HMA	USP42-NF37;BP2019;KP Ⅹ;EP9.2;JP17;IP2010;Martindale:The Extra Pharmacopoeia	021920,074106,074142,074162,074195,074198,074230,074242,074257,074289,074319,074367,074455,074480,074495,074635,074646,074661,074789,075168,075416,076544,078314,078432,078486,079096,090545,091183,091353,200629,202807,204872,205497,207612,208363	Inflammation	COX	Neuronal Signaling	Naproxen Sodium is a COX inhibitor for COX-1 and COX-2 with IC50 of 8.7 μM and 5.2 μM, respectively.	252.24	26159-34-2	3	11.89	50	198.22	http://selleckchem.com/products/Naproxen-Sodium(Aleve).html	C14H13NaO3	Sodium Salt	RS-3650	[Na+].COC1=CC=C2C=C(C=CC2=C1)C(C)C([O-])=O	1.375	1	0	3
S1627	Nitazoxanide	1	i22	in 10mM DMSO	FDA,DMF,NDC	Martindale:The Extra Pharmacopoeia	021497,021498,021818	Infection	Others	Others	Nitazoxanide is a synthetic nitrothiazolyl-salicylamide derivative and an antiprotozoal agent. (IC50 for canine influenza virus ranges from 0.17 to 0.21 μM)	307.28	55981-09-4	62	201.77	<1		http://selleckchem.com/products/Nitazoxanide(Alinia).html	C12H9N3O5S	free base	N/A	CC(=O)OC1=C(C=CC=C1)C(=O)NC2=NC=C(S2)[N+]([O-])=O	1.398	4	1	5
S1628	Triamcinolone Acetonide	1	k22	in 10mM DMSO	FDA,DMF,CFDA,NDC,PMDA,HMA	USP41-NF36;BP2018;EP9.2;IP2010;JP17;Martindale:The Extra Pharmacopoeia	011601,019503,040037,040038,040039,040040,040374,040386,040467,040671,040672,040771,070730,078104,085691,085692,085825,086275,086276,086277,086413,086414,087191,087192,087385,087797,087798,087799,087902,087912,087921,087922,087932,087990,087991,087992,088090,088091,088092,088094,088095,088096,088450,088451,088690,088692,089129,089274,089275,089276,089795,089796,089797,089798,089913,090164,090166,…	Infection/Inflammation	Glucocorticoid Receptor	Metabolism	Triamcinolone acetonide is a synthetic glucocorticoid, used in the symptomatic treatment of inflammation.	434.5	76-25-5	87	200.23	<1		http://selleckchem.com/products/Triamcinolone-Acetonide.html	C24H31FO6	free base	N/A	CC1(C)OC2CC3C4CCC5=CC(=O)C=CC5(C)C4(F)C(O)CC3(C)C2(O1)C(=O)CO	1.157	4	2	2
S1629	Orlistat	1	m22	in 10mM DMSO	FDA,DMF,EMA,HMA,CFDA,NDC	USP42-NF37;Martindale:The Extra Pharmacopoeia	021887,020766	Metabolic Disease	Lipase,Fatty Acid Synthase	Metabolism	Orlistat is a general lipase inhibitor with IC50 of 122 ng/ml for PL from human duodenal juice.	495.73	96829-58-2	99	199.71	<1		http://selleckchem.com/products/Orlistat(Alli).html	C29H53NO5	free base	Ro 18-0647, Tetrahydrolipstatin	CCCCCCCCCCCC(CC1OC(=O)C1CCCCCC)OC(=O)C(CC(C)C)NC=O	8.333	5	1	23
S1630	Allopurinol	1	o22	in 10mM DMSO	FDA,DMF,EMA,HMA,CFDA,NDC,PMDA	USP42-NF37;BP2019;KP Ⅹ;EP9.2;Ph.Int_6th;JP17;IP2010;Martindale:The Extra Pharmacopoeia	018241,018659,018785,018832,018877,070147,070150,070268,070269,070466,070467,070579,070580,070950,070951,071450,075798,077353,078253,078390,090637,203154,204467,210117,211820	Inflammation/Metabolic Disease	ROS	Immunology & Inflammation	Allopurinol is a purine analog inhibitor of the enzyme xanthine oxidase, used to treat gout or kidney stones, and to decrease levels of uric acid.	136.11	315-30-0	27	198.37	4	29.39	http://selleckchem.com/products/Allopurinol(Zyloprim).html	C5H4N4O	Free Base	N/A	O=C1N=CN=C2NNC=C12	-2.125	3	2	0
S1631	Allopurinol Sodium	1	b4	in 10mM DMSO	FDA,DMF,EMA,HMA,CFDA,NDC,PMDA	USP42-NF37;BP2019;KP Ⅹ;EP9.2;Ph.Int_6th;JP17;IP2010;Martindale:The Extra Pharmacopoeia	076870	Inflammation/Metabolic Disease	ROS	Immunology & Inflammation	Allopurinol Sodium is a xanthine oxidase inhibitor with an IC50 of 7.82±0.12 μM.	159.1	17795-21-0	32	201.13	32	201.13	http://selleckchem.com/products/Allopurinol-Sodium(Aloprim).html	C5H4N4NaO+	Sodium Salt	N/A	[Na+].O=C1NC=NC2=C1C=N[NH]2	-0.681	3	2	0
S1633	Zafirlukast	1	d4	in 10mM DMSO	FDA,DMF,NDC,HMA	Martindale:The Extra Pharmacopoeia	090372	Inflammation	LTR	Immunology & Inflammation	Zafirlukast is an oral leukotriene receptor antagonist (LTRA), used to prevent asthma symptoms.	575.68	107753-78-6	100	173.71	<1		http://selleckchem.com/products/Zafirlukast(Accolate).html	C31H33N3O6S	free base	ICI-204219	COC1=CC(=CC=C1CC2=C[N](C)C3=C2C=C(NC(=O)OC4CCCC4)C=C3)C(=O)N[S](=O)(=O)C5=CC=CC=C5C	6.299	6	2	9
S1635	Erythromycin	1	f4	in 10mM DMSO	FDA,DMF,CFDA,NDC,PMDA,HMA	USP38-NF33;BP2013;JP16;IP2010;Martindale:The Extra Pharmacopoeia	050532,062563,050610,061621,062326,062327,062328,062342,062446,062447,062481,062485,062616,062746,062825,062957,063038,063098,063211,064030,064039,064067,064126,064127,064128,064184,064187,065320,090215,208100,208154,209720	Infection	Anti-infection	Microbiology	Erythromycin is a macrolide antibiotic that has an antimicrobial spectrum similar to or slightly wider than that of penicillin (IC50=1.5 μg/ml).	733.93	114-07-8	147	200.29	3	4.09	http://selleckchem.com/products/Erythromycin(E-Mycin).html	C37H67NO13	Free Base	E-Mycin	CCC1OC(=O)C(C)C(OC2CC(C)(OC)C(O)C(C)O2)C(C)C(OC3OC(C)CC(C3O)N(C)C)C(C)(O)CC(C)C(=O)C(C)C(O)C1(C)O	1.792	8	3	7
S1636	Amphotericin B	1	h4	in 10mM DMSO	FDA,DMF,CFDA,NDC	USP42-NF37;KP Ⅹ ;BP2015;EP9.2;Ph.Int_6th;JP17;Martindale:The Extra Pharmacopoeia;	062728,063206,064062,064141	Infection	Anti-infection	Microbiology	Amphotericin B (AmB) is an amphipathic polyene antibiotic which permeabilizes ergosterol-containing membranes.	924.08	1397-89-3	22	23.81	<1		http://selleckchem.com/products/Amphotericin-B(Abelcet).html	C47H73NO17	free base	NSC 527017	CC1OC(OC/2CC3OC(O)(CC(O)CC(O)C(O)CCC(O)CC(O)CC(=O)OC(C)C(C)C(O)C(C)\C=C\C=C\C=C\C=C\C=C\C=C\C=C2)CC(O)C3C(O)=O)C(O)C(N)C1O	-2.617	6	10	3
S1638	Ibuprofen	1	j4	in 10mM DMSO	FDA,DMF,EMA,HMA,CFDA,NDC,PMDA	USP42-NF37;BP2019;EP9.6;KP Ⅹ;Ph.Int_6th;JP17;IP2010;Martindale:The Extra Pharmacopoeia	070038,070041,070045,070057,070079,070080,070081,070328,070329,070330,070435,070436,070437,070476,070481,070493,070556,070629,070630,070709,070733,070736,070818,070908,070985,070986,071027,071028,071029,071030,071122,071123,071124,071125,071144,071145,071146,071154,071163,071229,071230,071231,071232,071264,071265,071266,071267,071268,071333,071334,071335,071338,071448,071462,071547,071575,071639,…	Neurological Disease/Inflammation	COX	Neuronal Signaling	Ibuprofen (Dolgesic) is an anti-inflammatory inhibitor targeting COX-1 and COX-2 with IC50 of 13 μM and 370 μM, respectively.	206.28	15687-27-1	41	198.76	<1		http://selleckchem.com/products/Ibuprofen(Advil).html	C13H18O2	free base	N/A	CC(C)CC1=CC=C(C=C1)C(C)C(O)=O	3.607	1	0	4
S1639	Amprenavir	1	l4	in 10mM DMSO	FDA,DMF,EMA	Martindale:The Extra Pharmacopoeia	021007,021039	Infection	HIV Protease	Proteases	Amprenavir is a potent PXR-selective agonist, and an HIV protease inhibitor, used to treat HIV.	505.63	161814-49-9	16	31.64	<1		http://selleckchem.com/products/Amprenavir-(Agenerase).html	C25H35N3O6S	free base	141W94, VX-478, KVX-478	CC(C)CN(CC(O)C(CC1=CC=CC=C1)NC(=O)OC2CCOC2)[S](=O)(=O)C3=CC=C(N)C=C3	2.429	5	3	12
S1640	Albendazole	1	n4	in 10mM DMSO	FDA,DMF,CFDA,NDC,PMDA,HMA	USP42-NF37;EP9.6;KP Ⅹ;BP2018;Ph.Int_6th;Martindale:The Extra Pharmacopoeia	208094,208979,210011,210434,211117	Parasite	Microtubule Associated	Cytoskeletal Signaling	Albendazole is a member of the benzimidazole compounds used as a drug indicated for the treatment of a variety of worm infestations.	265.33	54965-21-8	17	64.07	<1		http://selleckchem.com/products/Albendazole(Albenza).html	C12H15N3O2S	free base	SKF-62979	CCCSC1=CC=C2N=C(NC(=O)OC)[NH]C2=C1	3.065	3	2	5
S1641	Chlorothiazide	1	p4	in 10mM DMSO	FDA,DMF,NDC	USP39-NF34;BP2015;IP2010;Martindale:The Extra Pharmacopoeia	084026,084217,085165,085173,085485,085569,086028,086795,086796,086938,086940,087736	Cardiovascular Disease/Metabolic Disease	Others	Others	Chlorothiazide is a diuretic and antihypertensive. (IC50=3.8 mM)	295.72	58-94-6	59	199.51	<1		http://selleckchem.com/products/Chlorothiazide(Diuril).html	C7H6ClN3O4S2	free base	N/A	N[S](=O)(=O)C1=C(Cl)C=C2N=CN[S](=O)(=O)C2=C1	-0.177	5	2	1
S1643	Ursodiol	1	b6	in 10mM DMSO	FDA,DMF,NDC	USP42-NF37	075517,075592,077895,079082,079184,090530,090801,200826,202540,210707,211145,211301	Gastroenterology	Others	Others	Ursodiol reduces cholesterol absorption and is used to dissolve (cholesterol) gallstones. (IC50=0.22 μM)	392.57	128-13-2	79	201.24	<1		http://selleckchem.com/products/Ursodiol(Actigal).html	C24H40O4	free base	N/A	CC(CCC(O)=O)C1CCC2C3C(O)CC4CC(O)CCC4(C)C3CCC12C	4.014	1	2	4
S1644	Nitrofural	1	d6	in 10mM DMSO	CFDA	EP9.2	N/A	Infection	Anti-infection	Microbiology	Nitrofural is a topical anti-infective agent with an IC50 of 22.83 ± 1.2 μM. (Rat LD50 = 590 mg/kg)	198.14	59-87-0	40	201.88	<1		http://selleckchem.com/products/Nitrofurazone(ACTIN-N).html	C6H6N4O4	free base	Nitrofurazone	NC(=O)N/N=C/C1=CC=C(O1)[N+]([O-])=O	0.223	3	2	3
S1645	Ketoprofen	1	f6	in 10mM DMSO	FDA,DMF,CFDA,NDC,PMDA,HMA	USP42-NF37;BP2019;KP Ⅹ;EP9.2;JP17;IP2010;Martindale:The Extra Pharmacopoeia	073515,073516,073517,074014,074024,074035,074879,075270,075364,075679	Neurological Disease/Inflammation	COX	Neuronal Signaling	Ketoprofen is a dual COX1/2 inhibitor, used as a nonsteroidal anti-inflammatory drug to treat arthritis-related inflammatory pains.	254.28	22071-15-4	51	200.57	<1		http://selleckchem.com/products/Ketoprofen(Actron).html	C16H14O3	free base	RP-19583	CC(C(O)=O)C1=CC(=CC=C1)C(=O)C2=CC=CC=C2	3.361	2	0	4
S1646	Ketorolac	1	h6	in 10mM DMSO	FDA,DMF,EMA,HMA,CFDA,NDC	USP42-NF37;BP2019;KP Ⅹ;EP9.2;IP2010;Martindale:The Extra Pharmacopoeia	074754,074761,074790,074801,074802,074955,074993,075222,075228,075230,075284,075299,075348,075626,075631,075772,075784,076109,076209,076271,076583,076722,077201,077308,077942,077943,078145,078299,078399,078434,078721,078737,090017,091065,201155,203242,203376,203410,204216,205191,209900,210616	Neurological Disease/Inflammation	COX	Neuronal Signaling	Ketorolac (Ketorolac tromethamine) is a non-selective COX inhibitor of COX-1 and COX-2 with IC50 of 1.23 μM and 3.50 μM, respectively.	255.27	74103-06-3	75	293.81	<1		http://selleckchem.com/products/Ketorolac-Tromethamine(Toradol).html	C15H13NO3	free base	N/A	OC(=O)C1CC[N]2C1=CC=C2C(=O)C3=CC=CC=C3	2.832	2	0	3
S1647	Adenosine	1	j6	in 10mM DMSO	FDA,DMF,CFDA,NDC,PMDA,HMA	USP42-NF37;BP2019;KP Ⅹ;EP9.2;Martindale:The Extra Pharmacopoeia	076404,076500,076501,076564,077133,077283,077425,077897,078076,078618,078640,078676,078686,079147,090010,090212,090220,090450,202313,203883,205331,205568,206778	Cardiovascular Disease	Adenosine Receptor	GPCR & G Protein	Adenosine is a nucleoside composed of a molecule of adenine attached to a ribose sugar molecule (ribofuranose) moiety via a β-N9-glycosidic bond.	267.24	58-61-7	12	44.9	<1		http://selleckchem.com/products/Adenosine(Adenocard).html	C10H13N5O4	free base	N/A	NC1=NC=NC2=C1N=C[N]2C3OC(CO)C(O)C3O	-1.881	4	4	2
S1649	Zolmitriptan	1	l6	in 10mM DMSO	FDA,DMF,CFDA,NDC,PMDA,HMA	USP42-NF37 ;EP9.5;Martindale:The Extra Pharmacopoeia	090861,201779,202078,202279,202476,202560,202890,202956,203019,203186,203476,203772,204041,204232,204284,204336,205074,206973,207021,207867	Neurological Disease	5-HT Receptor	Neuronal Signaling	Zolmitriptan is a novel and highly selective 5-HT(1B/1D) receptor agonist, used in the treatment of acute migraines.	287.36	139264-17-8	58	201.84	<1		http://selleckchem.com/products/Zolmitriptan(Zomig).html	C16H21N3O2	free base	N/A	CN(C)CCC1=C[NH]C2=C1C=C(CC3COC(=O)N3)C=C2	2.457	2	2	5
S1651	Telbivudine	1	n6	in 10mM DMSO	FDA,DMF,EMA,CFDA	Martindale:The Extra Pharmacopoeia	022011,022154	Infection	Reverse Transcriptase	Microbiology	Telbivudine is a potent, and selective HBV reverse transcriptase inhibitor, used to treat HBV infection.	242.23	3424-98-4	48	198.16	48	198.16	http://selleckchem.com/products/Telbivudine(Sebivo).html	C10H14N2O5	free base	N/A	CC1=CN(C2CC(O)C(CO)O2)C(=O)NC1=O	-1.238	3	3	2
S1652	Monobenzone	1	p6	in 10mM DMSO	FDA,DMF	USP42-NF37;Martindale:The Extra Pharmacopoeia	008173	Others	Tyrosinase	Proteases	Monobenzone is a compound used as a topical agent for medical depigmentation. It can specifically block tyrosinase.	200.23	103-16-2	40	199.77	<1		http://selleckchem.com/products/Monobenzone(Benoquin).html	C13H12O2	free base	N/A	OC1=CC=C(OCC2=CC=CC=C2)C=C1	3.155	1	1	3
S1653	Tretinoin	1	b8	in 10mM DMSO	FDA,DMF,CFDA,NDC,PMDA,HMA	USP42-NF37;EP9.2;BP2017;Martindale:The Extra Pharmacopoeia	074873,075213,075260,075264,075265,075529,075589,076498,077684,090098,201687,202026,202209,202567,207955,208279,211644,211645	Others	Retinoid Receptor	Metabolism	Tretinoin, which is a ligand for both the retinoic acid receptor (RAR) and the retinoid X receptor (RXR), can induce granulocytic differentiation and apoptosis in acute promyelocytic leukemia (APL) cells.	300.4	302-79-4	60	199.73	<1		http://selleckchem.com/products/Tretinoin(Aberela).html	C20H28O2	free base	All-trans Retinoic Acid	CC1=C(\C=C\C(C)=C\C=C\C(C)=C\C(O)=O)C(C)(C)CCC1	5.551	1	0	5
S1654	Phenylbutazone	1	d8	in 10mM DMSO	FDA,DMF,CFDA	USP42-NF37;BP2019;EP9.2;JP17;Martindale:The Extra Pharmacopoeia	084339,086151,087674,087756,087774,088218,088863,088994	Inflammation/Neurological Disease	Immunology & Inflammation related	Immunology & Inflammation	Phenylbutazone is used as a non-steroidal anti-inflammatory agent for the treatment of chronic pain, including the symptoms of arthritis.	308.37	50-33-9	62	201.06	<1		http://selleckchem.com/products/Phenylbutazone(Butazolidin).html	C19H20N2O2	free base	Butazolidine	CCCCC1C(=O)N(N(C1=O)C2=CC=CC=C2)C3=CC=CC=C3	3.954	2	0	5
S1655	Ezetimibe	1	f8	in 10mM DMSO	FDA,DMF,NDC,PMDA,HMA	USP42-NF37;Martindale:The Extra Pharmacopoeia	078560,078724,200831,201790,203931,204331,207311,208332,208803,209234,209838,211550	Metabolic Disease	LDL	Metabolism	Ezetimibe is a potent, selective, cholesterol absorption inhibitor, used to lower cholesterol.	409.4	163222-33-1	81	197.85	<1		http://selleckchem.com/products/Ezetimibe(Zetia).html	C24H21F2NO3	free base	SCH-58235	OC(CCC1C(N(C1=O)C2=CC=C(F)C=C2)C3=CC=C(O)C=C3)C4=CC=C(F)C=C4	4.633	1	2	6
S1657	Enalaprilat Dihydrate	1	h8	in 10mM DMSO	FDA,DMF,CFDA,NDC,HMA	USP42-NF37;BP2019;EP9.2;Martindale:The Extra Pharmacopoeia	075456,075458,075571,075578,075634,078687	Cardiovascular Disease/Endocrinology/Metabolic Disease	RAAS	Endocrinology & Hormones	Enalaprilat is an angiotensin-converting enzyme (ACE) inhibitor with IC50 of 1.94 nM.	348.4	84680-54-6	70	200.92	<1		http://selleckchem.com/products/Enalaprilat.html	C18H28N2O7	Dihydrate	MK-422 Dihydrate	O.O.CC(NC(CCC1=CC=CC=C1)C(O)=O)C(=O)N2CCCC2C(O)=O	-1.53	3	1	8
S1658	Dofetilide	1	j8	in 10mM DMSO	FDA,DMF,EMA,NDC	USP42-NF37;Martindale:The Extra Pharmacopoeia	207058,207746,208519,208625,210466	Cardiovascular Disease	Potassium Channel	Transmembrane Transporters	Dofetilide is a selective potassium channel ((hERG)) blocker, used as a Class III antiarrhythmic drug.	441.56	115256-11-6	88	199.29	<1		http://selleckchem.com/products/Dofetilide(Tikosyn).html	C19H27N3O5S2	free base	UK-68798	CN(CCOC1=CC=C(N[S](C)(=O)=O)C=C1)CCC2=CC=C(N[S](C)(=O)=O)C=C2	1.679	5	2	11
S1662	Isradipine	1	l8	in 10mM DMSO	FDA,DMF,NDC	USP42-NF37;BP2019;KP Ⅹ;EP9.2;Martindale:The Extra Pharmacopoeia	077169,077317,201067	Cardiovascular Disease	Calcium Channel	Transmembrane Transporters	Isradipine is a potent and selective L-type voltage-gated calcium channel blocker, used to treat high blood pressure.	371.39	75695-93-1	74	199.25	<1		http://selleckchem.com/products/Isradipine(Dynacirc).html	C19H21N3O5	free base	PN 200-110	COC(=O)C1=C(C)NC(=C(C1C2=CC=CC3=NON=C23)C(=O)OC(C)C)C	2.168	7	1	6
S1665	Estrone	1	n8	in 10mM DMSO	FDA,DMF,NDC	USP42-NF37;Martindale:The Extra Pharmacopoeia	083397,085239	Endocrinology	Estrogen/progestogen Receptor	Endocrinology & Hormones	Estrone is an estrogenic hormone.	270.37	53-16-7	54	199.73	<1		http://selleckchem.com/products/Estrone.html	C18H22O2	free base	N/A	CC12CCC3C(CCC4=CC(=CC=C34)O)C1CCC2=O	3.938	1	1	0
S1666	Flucytosine	1	p8	in 10mM DMSO	FDA,DMF,CFDA,NDC,PMDA	USP42-NF37;BP2019;KP Ⅹ;Ph.Int_6th;EP9.2;JP17;IP2010;Martindale:The Extra Pharmacopoeia	201566,204652,206550,207536	Infection	Anti-infection	Microbiology	Flucytosine (5-Fluorocytosine, 5-FC) is an antifungal drug with IC50 of 0.93 μM in C. albicans.	129.09	2022-85-7	8	61.97	5	38.73	http://selleckchem.com/products/Flucytosine(Ancobon).html	C4H4FN3O	free base	N/A	NC1=NC(=O)NC=C1F	-1.048	2	2	0
S1667	Trichlormethiazide	1	b10	in 10mM DMSO	FDA,DMF,PMDA	USP42-NF37;KP Ⅹ;JP17;Martindale:The Extra Pharmacopoeia	083462,083847,083855,083967,085568,085962,086171,086458,087005,087007	Cardiovascular Disease/Metabolic Disease	Others	Others	Trichlormethiazide is a diuretic with properties similar to those of hydrochlorothiazide.	380.66	133-67-5	54	141.86	<1		http://selleckchem.com/products/Trichlormethiazide(Achletin).html	C8H8Cl3N3O4S2	free base	N/A	N[S](=O)(=O)C1=C(Cl)C=C2NC(N[S](=O)(=O)C2=C1)C(Cl)Cl	1.046	4	3	2
S1669	Loteprednol etabonate	1	d10	in 10mM DMSO	FDA,DMF,NDC	Martindale:The Extra Pharmacopoeia	207609	Inflammation/Neurological Disease/Ophthalmology	Glucocorticoid Receptor	Endocrinology & Hormones	Loteprednol etabonate is a potent glucocorticoid receptor agonist, used in treatment of inflammation of the eye due to allergies.	466.95	82034-46-6	93	199.16	<1		http://selleckchem.com/products/Loteprednol-etabonate.html	C24H31ClO7	free base	N/A	CCOC(=O)OC1(CCC2C3CCC4=CC(=O)C=CC4(C)C3C(O)CC12C)C(=O)OCCl	3.865	6	1	7
S1673	Aminophylline	1	h10	in 10mM DMSO	FDA,DMF,CFDA,NDC,PMDA	USP42-NF37;BP2019;KP Ⅹ ;Ph.Int_6th;JP17;Martindale:The Extra Pharmacopoeia	081142,084530,084531,084533,084540,084552,084563,084568,084574,084575,084576,084577,084588,084632,084674,084699,085003,085261,085284,085289,085333,085409,085410,085564,085567,086606,087200,087209,087239,087240,087242,087250,087387,087392,087431,087500,087501,087522,087523,087600,087601,087867,087868,087886,088126,088156,088182,088183,088297,088298,088314,088319,088407,088429,088749	Inflammation/Respiratory Disease	PDE	Metabolism	Aminophylline is a competitive nonselective phosphodiesterase inhibitor with an IC50 of 0.12 mM and also a nonselective adenosine receptor antagonist.	420.43	317-34-0	53	126.06	84	199.8	http://selleckchem.com/products/Aminophylline(Truphylline).html	C16H24N10O4	Ethylenediamine	Phyllocontin	CN1C(=O)N(C)C2=C([NH]C=N2)C1=O.CN3C(=O)N(C)C4=C([NH]C=N4)C3=O.NCCN	-2.089	6	4	1
S1675	Lubiprostone	1	j10	in 10mM DMSO	FDA,DMF,NDC,PMDA,HMA	Martindale:The Extra Pharmacopoeia	021908	Gastrointestinal Disease	Chloride Channel	Transmembrane Transporters	Lubiprostone is an activator of ClC-2 chloride channels, used in the management of idiopathic chronic constipation.	390.46	136790-76-6	78	199.76	<1		http://selleckchem.com/products/Lubiprostone(Amitiza).html	C20H32F2O5	Free Base	RU 0211	CCCCC(F)(F)C(=O)CCC1C(O)CC(=O)C1CCCCCCC(O)=O	3.831	3	1	14
S1676	Amorolfine HCl	1	l10	in 10mM DMSO	DMF,CFDA,PMDA,HMA	EP9.7;BP2019;Martindale:The Extra Pharmacopoeia	N/A	Infection	Anti-infection	Microbiology	Amorolfine HCl is an antifungal reagent.	353.97	78613-38-4	28	79.1	9	25.43	http://selleckchem.com/products/Amorolfine-Hydrochloride.html	C21H36ClNO	Hydrochloride	N/A	Cl.CCC(C)(C)C1=CC=C(CC(C)CN2CC(C)OC(C)C2)C=C1	5.681	1	0	6
S1677	Chloramphenicol	1	n10	in 10mM DMSO	FDA,DMF,CFDA,NDC,PMDA,HMA	JP17;BP2017;Ph.Int_5th;IP2010;Martindale:The Extra Pharmacopoeia	060133,062042,062247,062406,062628	Infection	Anti-infection	Microbiology	Chloramphenicol is a bacteriostatic by inhibiting protein synthesis.	323.13	56-75-7	65	201.16	<1		http://selleckchem.com/products/Chloramphenicol(Chloromycetin).html	C11H12Cl2N2O5	free base	Chloromycetin	OCC(NC(=O)C(Cl)Cl)C(O)C1=CC=C(C=C1)[N+]([O-])=O	1.025	1	3	6
S1679	Flurbiprofen	1	p10	in 10mM DMSO	FDA,DMF,CFDA,NDC,PMDA,HMA	USP42-NF37;BP2019;KP Ⅹ;EP9.2;JP17;IP2010;Martindale:The Extra Pharmacopoeia	074358,074405,074411,074431,074448,074560,074647,075058	Inflammation	Immunology & Inflammation related	Immunology & Inflammation	Flurbiprofen is a member of the phenylalkanoic acid derivative family of non-steroidal anti-inflammatory drugs (NSAIDs).	244.26	5104-49-4	49	200.61	<1		http://selleckchem.com/products/Flurbiprofen(Ansaid).html	C15H13FO2	free base	N/A	CC(C(O)=O)C1=CC(=C(C=C1)C2=CC=CC=C2)F	3.68	1	0	3
S1680	Disulfiram	1	b12	in 10mM DMSO	FDA,DMF,NDC,PMDA	USP42-NF37;BP2019;KP Ⅹ ;EP9.2;JP17;IP2010;Martindale:The Extra Pharmacopoeia	086889,086890,087973,087974,088792,088793,091563,091619,091681,202652,203916	Psychotic disorders	Dehydrogenase	Metabolism	Disulfiram is a specific inhibitor of aldehyde-dehydrogenase (ALDH1), used for the treatment of chronic alcoholism by producing an acute sensitivity to alcohol.	296.54	97-77-8	59	198.96	<1		http://selleckchem.com/products/Disulfiram(Antabuse).html	C10H20N2S4	free base	NSC 190940	CCN(CC)C(=S)SSC(=S)N(CC)CC	5.6	0	0	9
S1681	Mesalamine	1	d12	in 10mM DMSO	FDA,DMF,NDC	USP42-NF37	076751,076841,091640,202065,203286,203574,203817,204354,207448,207873,208362,208953,209970,211858	Inflammation	IκB/IKK,Immunology & Inflammation related	NF-κB	Mesalamine is a specific inhibitor of TNFα-induced IKK activity, used to treat inflammatory bowel disease.	153.14	89-57-6	31	202.43	<1		http://selleckchem.com/products/Mesalamine(Lialda).html	C7H7NO3	free base	5-Aminosalicylic acid	NC1=CC=C(O)C(=C1)C(O)=O	0.471	1	2	1
S1683	Ipratropium Bromide	1	f12	in 10mM DMSO	FDA,DMF,CFDA,NDC,PMDA,HMA	USP42-NF37;BP2019;EP9.6;JP17;Martindale:The Extra Pharmacopoeia	074755,075111,075313,075441,075507,075552,075553,075562,075693,075835,075867,076025,076103,076155,076156,076291,076598,076664,077072,206543,207903	Immunology/Respiratory Disease	AChR	Neuronal Signaling	Ipratropium Bromide is an antagonist of M3 type muscarinic acetylcholine receptors, used for the treatment of chronic obstructive pulmonary disease (COPD).	412.37	22254-24-6	83	201.28	83	201.28	http://selleckchem.com/products/Ipratropium-bromide.html	C20H30BrNO3	Bromide	N/A	[Br-].CC(C)[N+]1(C)C2CCC1CC(C2)OC(=O)C(CO)C3=CC=CC=C3	-1.326	2	1	6
S1685	Sulfanilamide	1	h12	in 10mM DMSO	FDA,DMF,CFDA,NDC	USP42-NF37;BP2019;EP9.2;Martindale:The Extra Pharmacopoeia	088718	Infection	Anti-infection	Microbiology	Sulfanilamide (Sulphanilamide) is a competitive inhibitor for bacterial enzyme dihydropteroate synthetase with IC50 of 320 μM.	172.2	63-74-1	34	197.44	<1		http://selleckchem.com/products/Sulfanilamide.html	C6H8N2O2S	free base	N/A	NC1=CC=C(C=C1)[S](N)(=O)=O	-0.212	2	2	1
S1688	Betamethasone Dipropionate	1	j12	in 10mM DMSO	FDA,DMF,CFDA,NDC,PMDA,HMA	USP42-NF37;EP9.3;KP Ⅹ;BP2019;JP17;IP2010;Martindale:The Extra Pharmacopoeia	019136,019137,019140,019141,070274,070275,070281,070885,071012,071085,071143,071467,071476,071477,071882,072276,072526,072536,072538,073552,074271,074272,074304,074579,075276,075373,076215,076508,076543,076592,076603,076753,077111,077477,078930,206118,206389,208885,209896,210217,211540	Inflammation	Glucocorticoid Receptor	Endocrinology & Hormones	Betamethasone Dipropionate is a glucocorticoid steroid with anti-inflammatory and immunosuppressive abilities.	504.59	5593-20-4	100	198.18	<1		http://selleckchem.com/products/Betamethasone-Dipropionate(Diprolene).html	C28H37FO7	Free Base	SCH 11460	CCC(=O)OCC(=O)C1(OC(=O)CC)C(C)CC2C3CCC4=CC(=O)C=CC4(C)C3(F)C(O)CC12C	3.8	6	1	8
S1689	Meprednisone	1	l12	in 10mM DMSO	FDA	USP42-NF37;Martindale:The Extra Pharmacopoeia	016053	Cancer/Hematology/Immunology/Inflammation/Ophthalmology	Glucocorticoid Receptor	Endocrinology & Hormones	Meprednisone is a glucocorticoid and a methylated derivative of prednisone.	372.46	1247-42-3	75	201.37	<1		http://selleckchem.com/products/Betapar(Meprednisone).html	C22H28O5	free base	NSC 527579, SCH 4358	CC1CC2C3CCC4=CC(=O)C=CC4(C)C3C(=O)CC2(C)C1(O)C(=O)CO	1.536	3	1	2
S1690	Betamethasone Valerate	1	n12	in 10mM DMSO	FDA,DMF,CFDA,NDC,PMDA,HMA	USP42-NF37 ;BP2019;KP Ⅹ;EP9.2;Ph.Int_6th;JP17;IP2010;Martindale:The Extra Pharmacopoeia	018860,018861,018864,018865,018866,018870,070051,070052,070053,070062,070484,070485,070486,071478,071883,078337,207144,208204	Endocrinology/Gastrointestinal Disease/Inflammation	Glucocorticoid Receptor	Endocrinology & Hormones	Betamethasone Valerate is a moderately potent glucocorticoid steroid with anti-inflammatory and immunosuppressive properties.	476.58	2152-44-5	95	199.34	<1		http://selleckchem.com/products/Betamethasone-valerate(Betnovate).html	C27H37FO6	free base	N/A	CCCCC(=O)OC1(C(C)CC2C3CCC4=CC(=O)C=CC4(C)C3(F)C(O)CC12C)C(=O)CO	3.666	4	2	7
S1691	Praziquantel	1	p12	in 10mM DMSO	FDA,DMF,CFDA,NDC,PMDA	USP42-NF37;BP2019;EP9.2;Ph.Int_6th;IP2010;Martindale:The Extra Pharmacopoeia	208820	Infection	Anti-infection	Microbiology	Praziquantel is an anthelmintic effective against flatworms.	312.41	55268-74-1	63	201.66	<1		http://selleckchem.com/products/Praziquantel(Biltricide).html	C19H24N2O2	free base	N/A	O=C1CN(CC2N1CCC3=CC=CC=C23)C(=O)C4CCCCC4	2.477	2	0	1
S1692	Busulfan	1	b14	in 10mM DMSO	FDA,DMF,EMA,HMA,CFDA,NDC,PMDA	USP42-NF37;BP2019;EP9.2;KP Ⅹ;Ph.Int_6th;JP17;Martindale:The Extra Pharmacopoeia	202259,205106,205139,205184,205672,207050,207794,209580,210148,210448,210931	Cancer/Hematology	DNA alkylator	DNA Damage	Busulfan is a cell cycle non-specific alkylating antineoplastic agent.	246.3	55-98-1	49	198.94	<1		http://selleckchem.com/products/Busulfan(Busulfex).html	C6H14O6S2	free base	N/A	C[S](=O)(=O)OCCCCO[S](C)(=O)=O	-0.289	2	0	7
S1693	Carbamazepine	1	d14	in 10mM DMSO	FDA,DMF,CFDA,NDC,PMDA,HMA	USP42-NF37;BP2019;EP9.2;KP Ⅹ;Ph.Int_6th;JP17;Martindale:The Extra Pharmacopoeia	070231,070300,070429,071479,071696,071940,074649,075687,075712,075714,075875,075948,076697,077272,078115,078592,078746,078986,201106,205571	Neurological Disease	Sodium Channel,Autophagy	Transmembrane Transporters	Carbamazepine (Carbatrol) is a sodium channel blocker with IC50 of 131 μM in rat brain synaptosomes.	236.27	298-46-4	47	198.92	<1		http://selleckchem.com/products/Carbamazepine(Carbatrol).html	C15H12N2O	free base	NSC 169864	NC(=O)N1C2=C(C=CC=C2)C=CC3=C1C=CC=C3	2.679	1	1	0
S1696	Hydrocortisone	1	f14	in 10mM DMSO	FDA,DMF,EMA,HMA,CFDA,NDC,PMDA	USP35-NF30;BP2010;JP15;Martindale:The Extra Pharmacopoeia	009659,040247,040310,040351,040417,040503,040646,040761,040879,074171,080344,080355,080395,080400,080452,080456,080489,080496,080568,080624,080642,080692,080693,080732,080781,080848,081203,083140,083365,083999,084059,084243,084247,084969,084970,085025,085026,085027,085028,085070,085191,085282,085527,085662,085663,085733,086079,086080,086154,086155,086170,086256,086257,086271,086272,087315,087317,…	Endocrinology/Gastrointestinal Disease/Inflammation/Infection/Hematology/Metabolic Disease	Glucocorticoid Receptor	Endocrinology & Hormones	Hydrocortisone is a steroid hormone or glucocorticoid produced by the adrenal gland.	362.46	50-23-7	73	201.4	<1		http://selleckchem.com/products/Hydrocortisone.html	C21H30O5	free base	N/A	CC12CCC(=O)C=C1CCC3C4CCC(O)(C(=O)CO)C4(C)CC(O)C23	1.283	2	2	2
S1701	Desonide	1	h14	in 10mM DMSO	FDA,DMF,CFDA,NDC	USP42-NF37;USP38-NF33;Martindale:The Extra Pharmacopoeia	017010,017426,073548,074027,074254,075751,075860,202161,202470,207855,208836,209494,209729,209996,210998,212002	Immunology/Inflammation	Glucocorticoid Receptor	Endocrinology & Hormones	Desonide is a low potency topical corticosteroid.	416.51	638-94-8	83	199.27	<1		http://selleckchem.com/products/Desonide.html	C24H32O6	free base	N/A	CC1(C)OC2CC3C4CCC5=CC(=O)C=CC5(C)C4C(O)CC3(C)C2(O1)C(=O)CO	1.028	4	2	2
S1702	Didanosine	1	j14	in 10mM DMSO	FDA,DMF,CFDA,NDC,PMDA,HMA	USP42-NF37;BP2019;EP9.2;Ph.Int_6th;IP2010;Martindale:The Extra Pharmacopoeia	077167,077275,078112,090094,090788	Infection	Reverse Transcriptase	Microbiology	Didanosine is a reverse transcriptase inhibitor with an IC50 of 0.49 μM.	236.23	69655-05-6	47	198.96	<1		http://selleckchem.com/products/Didanosine(Videx).html	C10H12N4O3	free base	N/A	OCC1CCC(O1)[N]2C=NC3=C2N=CNC3=O	-0.844	4	2	2
S1703	Divalproex Sodium	1	l14	in 10mM DMSO	FDA,DMF,NDC	USP42-NF37;IP2010	076941,077100,077254,077296,077567,077615,078182,078239,078290,078411,078445,078597,078700,078705,078755,078790,078791,078853,078919,078979,079080,079163,090062,090070,090161,090210,090407,090554,202419,203730	Neurological Disease	HDAC	Epigenetics	Divalproex Sodium, consisting of a compound of sodium valproate and valproic acid in a 1:1 molar relationship in an enteric coated form, is a HDAC inhibitor, used in the treatment for epilepsy.	310.41	76584-70-8	62	199.74	62	199.74	http://selleckchem.com/products/Divalproex-sodium.html	C16H31NaO4	Sodium Salt	N/A	[Na+].CCCC(CCC)C(O)=O.CCCC(CCC)C([O-])=O	4.025	1	0	10
S1704	Emtricitabine	1	n14	in 10mM DMSO	FDA,DMF,EMA,HMA,CFDA,NDC,PMDA	Ph.Int_6th;IP2010;Martindale:The Extra Pharmacopoeia	079188,090488,091168	Infection	Reverse Transcriptase	Microbiology	Emtricitabine (FTC) is a new nucleoside agent that has activity against both human immunodeficiency virus (HIV) and hepatitis B virus. It is a reverse transcriptase inhibitor. Intracellular half-life is 39 h.	247.25	143491-57-0	49	198.18	49	198.18	http://selleckchem.com/products/Emtricitabine.html	C8H10FN3O3S	free base	N/A	NC1=NC(=O)N(C=C1F)C2CSC(CO)O2	-0.68	3	2	2
S1705	Progesterone	1	p14	in 10mM DMSO	FDA,DMF,CFDA,NDC,PMDA,HMA	USP42-NF37;KP Ⅹ; EP9.2;Ph.Int_6th;JP17;IP2010;Martindale:The Extra Pharmacopoeia	009238,017362,075906,090845,091033,200456,200900,202121,205229,207724,208801,210965,211285	Endocrinology	Estrogen/progestogen Receptor	Endocrinology & Hormones	Progesterone is an endogenous steroid hormone involved in the menstrual cycle, pregnancy, and embryogenesis of humans and other species. A potent agonist of the nuclear progesterone receptor (nPR) with Kd of 1 nM An agonist of the membrane progesterone receptors(mPRs) An antagonist of the σ1 receptor.	314.46	57-83-0	22	69.96	<1		http://selleckchem.com/products/Progesterone(Prometrium).html	C21H30O2	free base	N/A	CC(=O)C1CCC2C3CCC4=CC(=O)CCC4(C)C3CCC12C	3.86	2	0	1
S1706	Lamivudine	1	b16	in 10mM DMSO	FDA,DMF,EMA,HMA,CFDA,NDC,PMDA	USP42-NF37;BP2019;KP Ⅹ;EP9.2;Ph.Int_6th;IP2010;Martindale:The Extra Pharmacopoeia	077221,077357,077464,077695,077980,078545,078636,078850,090198,090433,090457,091475,091606,200406,202032,202941,203260,203277,203564,203586,204002,204528,205217,206974,211306	Infection	Reverse Transcriptase	Microbiology	Lamivudine is a potent nucleoside analog reverse transcriptase inhibitor, used for treatment of chronic HBV and HIV/AIDS. It works by blocking the HIV reverse transcriptase and hepatitis B virus polymerase.	229.26	134678-17-4	46	200.65	46	200.65	http://selleckchem.com/products/Lamivudine(Epivir).html	C8H11N3O3S	free base	GR109714X	NC1=NC(=O)N(C=C1)C2CSC(CO)O2	-0.59	3	2	2
S1709	Estradiol	1	d16	in 10mM DMSO	FDA,DMF,EMA,HMA,CFDA,NDC,PMDA	USP39-NF34;BP2015;JP16;IP2010;Martindale:The Extra Pharmacopoeia	020167,020538,021048,040114,040138,040197,040275,040297,040326,075182,075233,201675,205256,206388,206685,208788,209767,210194,210264,210488,211293,211396	Angiology/Endocrinology	Estrogen/progestogen Receptor	Endocrinology & Hormones	Estradiol, or more precisely, 17β-estradiol, is a human sex hormone and steroid, and the primary female sex hormone.	272.38	50-28-2	54	198.25	<1		http://selleckchem.com/products/Estradiol.html	C18H24O2	free base	N/A	CC12CCC3C(CCC4=C3C=CC(=C4)O)C1CCC2O	3.838	0	2	0
S1712	Deferasirox	1	f16	in 10mM DMSO	FDA,DMF,EMA,HMA,NDC,PMDA	EP;Martindale:The Extra Pharmacopoeia	203560,208697,208882,209426,210920,211383	Hematology	P450 (e.g. CYP17)	Proteases	Deferasirox is an iron chelator, also a cytochrome P450 3A4 inducer, Cytochrome P450 2C8 inhibitor, and Cytochrome P450 1A2 inhibitor.	373.36	201530-41-8	74	198.2	<1		http://selleckchem.com/products/Deferasirox(Exjade).html	C21H15N3O4	free base	CGP-72670, ICL-670	OC(=O)C1=CC=C(C=C1)[N]2N=C(N=C2C3=CC=CC=C3O)C4=CC=CC=C4O	4.063	3	2	4
S1713	Piroxicam	1	h16	in 10mM DMSO	FDA,DMF,CFDA,NDC,PMDA	USP42-NF37 ;BP2019;KP Ⅹ;EP9.2;JP17;IP2010;Martindale:The Extra Pharmacopoeia	073536,073637,073638,073651,074036,074043,074102,074103,074116,074118,074131,074148,074287,074460,074808,205585,206136,206152,207938,208340,208991,209256,210347	Inflammation	COX	Neuronal Signaling	Piroxicam is a non-selective COX inhibitor, used in the treatment of rheumatoid and osteoarthritis.	331.35	36322-90-4	66	199.19	<1		http://selleckchem.com/products/Piroxicam(Feldene).html	C15H13N3O4S	free base	CP 16171	CN1C(=C(O)C2=C(C=CC=C2)[S]1(=O)=O)C(=O)NC3=NC=CC=C3	0.501	4	2	2
S1714	Gemcitabine	1	j16	in 10mM DMSO	FDA,DMF,CFDA,NDC,PMDA,HMA	USP42-NF37;BP2019;EP9.2;Martindale:The Extra Pharmacopoeia	078460,090644	Cancer/Respiratory Disease	Autophagy,DNA/RNA Synthesis	DNA Damage	Gemcitabine, a nucleic acid synthesis inhibitor, is a very potent and specific deoxycytidine analogue, used as chemotherapy.	263.2	95058-81-4	52	197.57	52	197.57	http://selleckchem.com/products/Gemcitabine(Gemzar).html	C9H11F2N3O4	Free Base	LY-188011, NSC 613327	NC1=NC(=O)N(C=C1)C2OC(CO)C(O)C2(F)F	-1.394	3	3	2
S1715	Glipizide	1	l16	in 10mM DMSO	FDA,DMF,CFDA,NDC,HMA	USP42-NF37;EP9.7;BP2019;IP2010;Martindale:The Extra Pharmacopoeia	074223,074226,074305,074370,074378,074387,074438,074497,074542,074550,074619,075795,076159,076467,077820,202298,203499,204720,206928	Endocrinology/Metabolic Disease	Others	Others	Glipizide is used to treat high blood sugar levels caused by a type of diabetes mellitus called type 2 diabetes.	445.54	29094-61-9	89	199.76	<1		http://selleckchem.com/products/Glipizide(Glucotrol).html	C21H27N5O4S	free base	CP-28720	CC1=NC=C(N=C1)C(=O)NCCC2=CC=C(C=C2)[S](=O)(=O)NC(=O)NC3CCCCC3	1.902	6	3	7
S1716	Glyburide (Glibenclamide)	1	n16	in 10mM DMSO	FDA,DMF,CFDA,NDC	USP42-NF37	074388,075947,076257,077537,090937,203379,203581,206079,206483,206749	Endocrinology	Potassium Channel	Transmembrane Transporters	Glyburide (Glibenclamide) is a known blocker of vascular ATP-sensitive K+ channels (KATP), used in the treatment of type 2 diabetes.	494	10238-21-8	99	200.4	<1		http://selleckchem.com/products/Glyburide(Diabeta).html	C23H28ClN3O5S	free base	N/A	COC1=C(C=C(Cl)C=C1)C(=O)NCCC2=CC=C(C=C2)[S](=O)(=O)NC(=O)NC3CCCCC3	4.14	5	3	8
S1717	Fomepizole	1	p16	in 10mM DMSO	FDA,DMF,NDC,PMDA,HMA	Martindale:The Extra Pharmacopoeia	078368,078537,078639,079033	Others	Dehydrogenase	Metabolism	Fomepizole is a competitive inhibitor of alcohol dehydrogenase, the enzyme that catalyzes the initial steps in the metabolism of ethylene glycol and methanol to their toxic metabolites.	82.1	7554-65-6	The physical form of the compound is liquid, which can be dissolved in any proportion.				http://selleckchem.com/products/Fomepizole(Antizol).html	C4H6N2	free base	4-methylpyrazole, Antizol, Antizol-Vet	CC1=C[NH]N=C1	0.76	1	1	0
S1718	Adefovir Dipivoxil	1	b18	in 10mM DMSO	FDA,DMF,EMA,CFDA,NDC	Martindale:The Extra Pharmacopoeia	202051,205459	Infection	Reverse Transcriptase	Microbiology	Adefovir Dipivoxil is a reverse transcriptase inhibitor, used in the treatment of chronic hepatitis B virus (HBV).	501.47	142340-99-6	100	199.41	<1		http://selleckchem.com/products/Adefovir-Dipivoxil(Preveon).html	C20H32N5O8P	free base	N/A	CC(C)(C)C(=O)OCO[P](=O)(COCC[N]1C=NC2=C1N=CN=C2N)OCOC(=O)C(C)(C)C	1.666	10	1	15
S1719	Zalcitabine	1	d18	in 10mM DMSO	FDA,HMA	USP42-NF37;Martindale:The Extra Pharmacopoeia	020199	Infection	Reverse Transcriptase	Microbiology	Zalcitabine is a nucleoside analog HIV reverse transcriptase inhibitor (NARTI).	211.22	7481-89-2	7	33.14	42	198.84	http://selleckchem.com/products/Zalcitabine.html	C9H13N3O3	free base	NSC 606170, Ro 24-2027/000	NC1=NC(=O)N(C=C1)C2CCC(CO)O2	-0.991	3	2	2
S1721	Azathioprine	1	f18	in 10mM DMSO	FDA,DMF,CFDA,NDC,PMDA,HMA	USP42-NF37;BP2019;EP9.2;KP Ⅹ;Ph.Int_6th;IP2010;JP17;Martindale:The Extra Pharmacopoeia	071056,074069,075568,077621	Inflammation	Rho	Cell Cycle	Azathioprine is an immunosuppressive drug, inhibiting purine synthesis and GTP-binding protein Rac1 activation, used in the treatment of organ transplantation and autoimmune diseases.	277.26	446-86-6	54	194.76	<1		http://selleckchem.com/products/Azathioprine(Azasan).html	C9H7N7O2S	free base	N/A	C[N]1C=NC(=C1SC2=C3[NH]C=NC3=NC=N2)[N+]([O-])=O	1.071	4	1	3
S1723	Indomethacin	1	h18	in 10mM DMSO	FDA,DMF,CFDA,NDC	USP42-NF37;KP Ⅹ;IP2010;CP2005	018690,018730,018806,018829,018851,018858,022536,070067,070068,070326,070327,070353,070354,070487,070488,070529,070530,070592,070624,070635,070651,070673,070674,070719,070756,070782,070784,070785,070813,070900,071148,071149,071342,071343,071412,071635,072410,072996,072997,073314,074464,076114,076666,079175,090403,091240,091276,091401,091549,200529,201807,202139,202572,202706,202711,203501,204243,…	Inflammation	COX	Neuronal Signaling	Indomethacin is a nonselective COX1 and COX2 inhibitor with IC50 of 0.1 μg/mL and 5 μg/mL, respectively, used to reduce fever, pain, stiffness, and swelling.	357.79	53-86-1	72	201.24	<1		http://selleckchem.com/products/Indomethacin(Indocid).html	C19H16ClNO4	free base	N/A	COC1=CC=C2[N](C(=C(CC(O)=O)C2=C1)C)C(=O)C3=CC=C(Cl)C=C3	4.235	3	0	4
S1725	Terbinafine	1	j18	in 10mM DMSO	FDA,DMF,CFDA,NDC,PMDA,HMA	USP42-NF37;BP2019;EP9.2;JP17;Martindale:The Extra Pharmacopoeia	076377,076390,076713,077065,077136,077137,077195,077223,077511,077533,077714,077919,078157,078163,078199,078229,078297	Infection	Anti-infection	Microbiology	Terbinafine is used to treat infections caused by a fungus. It works by killing the fungus or preventing its growth.	291.43	91161-71-6	58	199.02	<1		http://selleckchem.com/products/Terbinafine(Lamisil).html	C21H25N	Free Base	SF 86-327	CN(C\C=C\C#CC(C)(C)C)CC1=CC=CC2=CC=CC=C12	5.335	0	0	6
S1727	Levonorgestrel	1	l18	in 10mM DMSO	FDA,DMF,CFDA,NDC,PMDA,HMA	USP42-NF37;BP2019;EP9.2;Ph.Int_6th;IP2010;Martindale:The Extra Pharmacopoeia	020627,078665,078666,090740,091328,200670,202246,202334,202380,202508,202684,202684,202739,202740,202740,204044,205329,207044,207660	Endocrinology	Estrogen/progestogen Receptor	Endocrinology & Hormones	Levonorgestrel is a female hormone that prevents ovulation.	312.45	797-63-7	45	144.02	<1		http://selleckchem.com/products/Levonorgestrel(Levonelle).html	C21H28O2	free base	N/A	CCC12CCC3C(CCC4=CC(=O)CCC34)C1CCC2(O)C#C	4.771	1	0	1
S1729	Gemfibrozil	1	n18	in 10mM DMSO	FDA,DMF,CFDA,NDC,HMA	USP42-NF37;BP2019;EP9.2	072929,073466,074156,074256,074270,074360,074442,074452,074615,075034,077836,078012,078207,078599,079072,079239,202726,203266,204189	Cardiovascular Disease	PPAR	Metabolism	Gemfibrozil is an activator of peroxisome proliferator-activated receptor-alpha (PPARα), used for the treatment of hypercholesterolemia and hypertriglyceridemia.	250.33	25812-30-0	50	199.74	<1		http://selleckchem.com/products/Gemfibrozil(Lopid).html	C15H22O3	free base	CI-719	CC1=CC(=C(C)C=C1)OCCCC(C)(C)C(O)=O	4.172	2	0	6
S1730	Indapamide	1	p18	in 10mM DMSO	FDA,DMF,CFDA,NDC,PMDA,HMA	USP42-NF37;BP2019;KP Ⅹ ;EP9.2;JP17;IP2010;Martindale:The Extra Pharmacopoeia	074299,074461,074498,074585,074594,074665,074722,075105,075201	Cardiovascular Disease	Others	Others	Indapamide is a non-thiazide sulphonamide diuretic compound, generally used in the treatment of hypertension, as well as decompensated cardiac failure.	365.83	26807-65-8	73	199.55	<1		http://selleckchem.com/products/Indapamide(Lozol).html	C16H16ClN3O3S	free base	N/A	CC1CC2=C(C=CC=C2)N1NC(=O)C3=CC=C(Cl)C(=C3)[S](N)(=O)=O	2.664	3	2	3
S1732	Mitotane	1	b20	in 10mM DMSO	FDA,DMF,EMA,NDC,PMDA	USP42-NF37;Martindale:The Extra Pharmacopoeia	016885	Cancer/Endocrinology	Others	Others	Mitotane, is an antineoplastic medication used in the treatment of adrenocortical carcinoma.	320.04	53-19-0	64	199.98	<1		http://selleckchem.com/products/Mitotane(Lysodren).html	C14H10Cl4	free base	NCI-C04933	ClC(Cl)C(C1=CC=C(Cl)C=C1)C2=C(Cl)C=CC=C2	5.745	0	0	3
S1733	Methylprednisolone	1	d20	in 10mM DMSO	FDA,DMF,CFDA,NDC,PMDA,HMA	USP42-NF37;BP2019;EP9.2;KP Ⅹ;Ph.Int_6th;JP17;IP2010;Martindale:The Extra Pharmacopoeia	040183,040189,040194,040232,085650,086159,086161,087341,088497,089207,089208,089209,204072,206751,209097,210985,086906,087535	Cancer/Immunology/Inflammation	Glucocorticoid Receptor,Immunology & Inflammation related	Endocrinology & Hormones	Methylprednisolone is a synthetic glucocorticoid receptor agonist, used to achieve prompt suppression of inflammation.	374.47	83-43-2	75	200.28	<1		http://selleckchem.com/products/Methylprednisolone.html	C22H30O5	free base	NSC-19987	CC1CC2C3CCC(O)(C(=O)CO)C3(C)CC(O)C2C4(C)C=CC(=O)C=C14	1.512	2	2	2
S1734	Meloxicam	1	f20	in 10mM DMSO	FDA,DMF,CFDA,NDC,PMDA,HMA	USP42-NF37;BP2019;EP9.2;KP Ⅹ;Martindale:The Extra Pharmacopoeia	077882,077918,077920,077921,077923,077925,077927,077928,077929,077930,077931,077932,077933,077934,077935,077936,077937,077938,077944,078008,078039,078102,211398	Inflammation	COX	Neuronal Signaling	Meloxicam is a selective COX inhibitor, used to relieve pain and fever effects.	351.4	71125-38-7	30	85.37	<1		http://selleckchem.com/products/Meloxicam(Mobic).html	C14H13N3O4S2	free base	N/A	CN1C(=C(O)C2=C(C=CC=C2)[S]1(=O)=O)C(=O)NC3=NC=C(C)S3	0.255	4	2	2
S1735	Mesna	1	h20	in 10mM DMSO	FDA,DMF,CFDA,NDC,PMDA,HMA	USP42-NF37;BP2019;EP9.2;Martindale:The Extra Pharmacopoeia	075739,075764,075811,076488,090913,203364,206992	Others	Others	Others	Mesna, a sulfhydryl compound that is used to reduce the incidence of hemorrhagic cystitis associated with certain chemotherapeutic agents.	164.18	19767-45-4	33	201	7	42.64	http://selleckchem.com/products/Mesna(Uromitexan).html	C2H5NaO3S2	Sodium Salt	N/A	[Na+].[O-][S](=O)(=O)CCS	-2.227	0	0	2
S1736	Methocarbamol	1	j20	in 10mM DMSO	FDA,DMF,CFDA,NDC,PMDA,HMA	USP42-NF37;KP Ⅹ;Martindale:The Extra Pharmacopoeia	040413,040489,083605,084231,084259,084276,084277,084323,084448,084449,084471,084486,084488,084615,084616,084648,084649,084675,084756,084846,084924,084927,084928,085033,085123,085137,085159,085180,085192,085658,085660,085718,085961,085963,086459,086988,086989,087282,087283,087453,087454,087589,087590,087660,087661,088646,088647,088731,089082,089417,089418,089849,090200,200958,203550,204404,205354,…	Others	Carbonic Anhydrase	Metabolism	Methocarbamol is a carbonic anhydrase inhibitor, used as a central muscle relaxant to treat skeletal muscle spasms.	241.24	532-03-6	48	198.97	2	8.29	http://selleckchem.com/products/Methocarbamol(Robaxin).html	C11H15NO5	free base	AHR 85	COC1=C(OCC(O)COC(N)=O)C=CC=C1	0.916	4	2	7
S1737	Prednisolone	1	l20	in 10mM DMSO	FDA,DMF,CFDA,NDC,PMDA,HMA	BP2013;JP16;IP2010;USP35-NF30;Martindale:The Extra Pharmacopoeia	040192,040287,040313,040322,040323,040364,040399,040401,040423,040570,040571,040775,080211,080236,080307,080322,080324,080325,080326,080327,080339,080342,080351,080354,080358,080378,080398,080531,080534,080562,080625,080748,080780,083675,084426,084439,084542,084773,085085,085170,085415,085416,087987,088892	Endocrinology/Hematology/Immunology/Inflammation	Immunology & Inflammation related,Glucocorticoid Receptor	Endocrinology & Hormones	Prednisolone is a synthetic glucocorticoid with anti-inflammatory and immunomodulating properties.	360.44	50-24-8	72	199.76	<1		http://selleckchem.com/products/Prednisolone(Hydroretrocortine).html	C21H28O5	Free Base	N/A	CC12CC(O)C3C(CCC4=CC(=O)C=CC34C)C1CCC2(O)C(=O)CO	1.26	2	2	2
S1738	Telmisartan	1	n20	in 10mM DMSO	FDA,DMF,EMA,HMA,CFDA,NDC,PMDA	USP42-NF37;EP9.7;BP2019;KP Ⅹ;JP17;Martindale:The Extra Pharmacopoeia	078710,090032,202130,202397,203171,203325,203867,204164,204415,205150,205901,206511,207016,207843,207882,208605	Cardiovascular Disease	RAAS	Endocrinology & Hormones	Telmisartan is an angiotensin II receptor antagonist (ARB) used in the management of hypertension.	514.62	144701-48-4	13	25.26	<1		http://selleckchem.com/products/Telmisartan(Micardis).html	C33H30N4O2	free base	BIBR 277	CCCC1=NC2=C(C=C(C=C2C)C3=NC4=C(C=CC=C4)[N]3C)[N]1CC5=CC=C(C=C5)C6=CC=CC=C6C(O)=O	7.799	3	0	7
S1739	Thiabendazole	1	p20	in 10mM DMSO	FDA,DMF	USP42-NF37;IP2010	016096,016097	Infection/Parasitology	P450 (e.g. CYP17)	Metabolism	Thiabendazole inhibits the mitochondrial helminth-specific enzyme, fumarate reductase, with anthelminthic property, used as an anthelmintic and fungicide agent. It is a potent inhibitor of cytochrome P450 1A2 (CYP1A2).	201.25	148-79-8	40	198.76	<1		http://selleckchem.com/products/Thiabendazole.html	C10H7N3S	free base	N/A	[NH]1C2=C(C=CC=C2)N=C1C3=CSC=N3	2.154	2	1	1
S1740	Guaifenesin	1	b22	in 10mM DMSO	FDA,DMF,CFDA,NDC,PMDA,HMA	USP42-NF37;EP9.4;KP Ⅹ;BP2017;JP17;Martindale:The Extra Pharmacopoeia	078912,091009,207342,209215,209254	Respiratory Disease	Others	Others	Guaifenesin is an expectorant used to relieve chest congestion.	198.22	93-14-1	40	201.8	25	126.12	http://selleckchem.com/products/Guaifenesin(Guaiphenesin).html	C10H14O4	free base	N/A	COC1=C(OCC(O)CO)C=CC=C1	0.747	2	2	5
S1741	Rifabutin	1	d22	in 10mM DMSO	FDA,DMF,CFDA,NDC,PMDA	USP42-NF37;BP2019;EP9.2;KP Ⅹ;Martindale:The Extra Pharmacopoeia	090033	Infection	Anti-infection	Microbiology	Rifabutin is a semisynthetic ansamycin antibiotic, used in the treatment of Mycobacterium avium intracellulare (MAI) and tuberculosis.	847	72559-06-9	60	70.84	<1		http://selleckchem.com/products/Rifabutin(Mycobutin).html	C46H62N4O11	free base	LM427, Ansamycin	COC1\C=C\OC2(C)OC3=C(C2=O)C4=C(C(=C3C)O)C(=O)C(=C5NC6(CCN(CC6)CC(C)C)N=C45)NC(=O)/C(=C/C=C/C(C)C(O)C(C)C(O)C(C)C(OC(C)=O)C1C)C	3.931	9	5	5
S1742	Nevirapine	1	f22	in 10mM DMSO	FDA,DMF,EMA,HMA,CFDA,NDC,PMDA	USP42-NF37;EP9.3;BP2019;Ph.Int_6th;IP2010;Martindale:The Extra Pharmacopoeia	077429,077521,077702,077956,078195,078584,078644,078864,078887,090688,202212,202523,203021,203080,203176,203411,204621,205258,205651,205921,206271,206448,206879,207064,207467,207684,207698,208616	Infection	Reverse Transcriptase	Microbiology	Nevirapine is a non-nucleoside reverse transcriptase inhibitor (NNRTI) used to treat HIV-1 infection and AIDS.	266.3	129618-40-2	53	199.02	<1		http://selleckchem.com/products/Nevirapine(Viramune).html	C15H14N4O	free base	NSC 641530	CC1=CC=NC2=C1NC(=O)C3=C(N=CC=C3)N2C4CC4	2.293	3	1	1
S1743	NEXIUM (esomeprazole magnesium)	1	h22	in 10mM DMSO	FDA,DMF,CFDA,NDC,PMDA,HMA	N/A	021153,021957,022101	Gastrointestinal Disease	Proton Pump	Transmembrane Transporters	Esomeprazole Magnesium is a proton pump inhibitor to reduce gastric acid secretion.	713.12	161973-10-0	143	200.53	<1		http://selleckchem.com/products/nexium-esomeprazole-magnesium.html	C34H36MgN6O6S2	Magnesium salt	N/A	[Mg++].COC1=CC2=C([N-]C(=N2)[S](=O)CC3=C(C)C(=C(C)C=N3)OC)C=C1.COC4=CC5=C([N-]C(=N5)[S](=O)CC6=NC=C(C)C(=C6C)OC)C=C4	6.1	10	0	10
S1744	Nicotinic Acid	1	j22	in 10mM DMSO	DMF,EMA,HMA,CFDA,PMDA	USP42-NF37;EP9.3;BP2019;KP Ⅹ;Ph.Int_6th;JP17;IP2010;Martindale:The Extra Pharmacopoeia	N/A	Cardiovascular Disease	Vitamin	Metabolism	Nicotinic Acid is a water-soluble vitamin belonging to the vitamin B family.	123.11	59-67-6	25	203.07	2	16.25	http://selleckchem.com/products/Niacin(Nicotinic-acid).html	C6H5NO2	free base	N/A	OC(=O)C1=CC=CN=C1	0.309	2	0	1
S1747	Nimodipine	1	l22	in 10mM DMSO	FDA,DMF,CFDA,NDC	USP42-NF37;BP2019;KP Ⅹ;EP9.2;Martindale:The Extra Pharmacopoeia	076740,077067,077811,090103,201832	Cardiovascular Disease	Autophagy,Calcium Channel	Transmembrane Transporters	Nimodipine is a dihydropyridine calcium channel blocker and an autophagy inhibitor, used in the treatment of high blood pressure.	418.44	66085-59-4	84	200.75	<1		http://selleckchem.com/products/Nimodipine(Nimotop).html	C21H26N2O7	free base	BAY E 9736	COCCOC(=O)C1=C(C)NC(=C(C1C2=CC=CC(=C2)[N+]([O-])=O)C(=O)OC(C)C)C	2.361	5	1	10
S1748	Nisoldipine	1	n22	in 10mM DMSO	FDA,DMF,CFDA,NDC,PMDA	Martindale:The Extra Pharmacopoeia	079051,091001	Cardiovascular Disease	Calcium Channel	Transmembrane Transporters	Nisoldipine (Sular) is a calcium channel blocker belonging to the dihydropyridines class, specific for L-type Cav1.2 with IC50 of 10 nM.	388.41	63675-72-9	77	198.24	<1		http://selleckchem.com/products/Nisoldipine(Sular).html	C20H24N2O6	free base	BAY K 5552	COC(=O)C1=C(C)NC(=C(C1C2=CC=CC=C2[N+]([O-])=O)C(=O)OCC(C)C)C	2.958	4	1	8
S1750	Octocrylene	1	p22	in 10mM DMSO	FDA,DMF,NDC	USP42-NF37	021471,022009,021502,021501	Others	Others	Others	Octocrylene is an organic compound used as an ingredient in sunscreens and cosmetics.	361.48	6197-30-4	The physical form of the compound is liquid, which can be dissolved in any proportion.				http://selleckchem.com/products/octocrylene.html	C24H27NO2	free base	N/A	CCCCC(CC)COC(=O)C(C#N)=C(C1=CC=CC=C1)C2=CC=CC=C2	6.487	2	0	10
S1754	Oxybutynin	2	a3	in 10mM DMSO	FDA,DMF,EMA,HMA,CFDA,NDC,PMDA	USP42-NF37;BP2019;EP9.2;Martindale:The Extra Pharmacopoeia	090526	Others	AChR	Neuronal Signaling	Oxybutynin is a competitive antagonist of the M1, M2, and M3 subtypes of the muscarinic acetylcholine receptor, used to relieve urinary and bladder difficulties.	357.49	5633-20-5	71	198.61	<1		http://selleckchem.com/products/Oxybutynin(Ditropan).html	C22H31NO3	Free Base	N/A	CCN(CC)CC#CCOC(=O)C(O)(C1CCCCC1)C2=CC=CC=C2	4.646	2	0	10
S1756	Enoxacin	2	c3	in 10mM DMSO	FDA,DMF,CFDA	KP Ⅹ;JP17;CP2005;Martindale:The Extra Pharmacopoeia	019616	Infection	Topoisomerase	DNA Damage	Enoxacin is an oral broad-spectrum fluoroquinolone antibacterial agent by inhibiting bacterial DNA gyrase and topoisomerase IV, used to treat a wide variety of infections.	320.32	74011-58-8	32	99.9	<1		http://selleckchem.com/products/Enoxacin(Penetrex).html	C15H17FN4O3	free base	AT-2266, CI919, Pd107779, NSC 629661	CCN1C=C(C(O)=O)C(=O)C2=CC(=C(N=C12)N3CCNCC3)F	-1.483	3	1	3
S1759	Pitavastatin Calcium	2	e3	in 10mM DMSO	FDA,DMF,CFDA,NDC,PMDA,HMA	JP17;Martindale:The Extra Pharmacopoeia	205932,205955,206015,206029,206070	Cardiovascular Disease	HMG-CoA Reductase	Metabolism	Pitavastatin calcium, a novel member of the medication class of statins, is a calcium salt formulation of pitavastatin which is a highly effective HMG-CoA reductase inhibitor.	880.98	147526-32-7	51	57.89	<1		http://selleckchem.com/products/Pitavastatin-calcium(Livalo).html	C50H46CaF2N2O8	Calcium salt	NK-104, P-872441, itavastatin, nisvastatin	[Ca++].OC(CC(O)C=CC1=C(C2=CC=C(F)C=C2)C3=CC=CC=C3N=C1C4CC4)CC([O-])=O.OC(CC(O)C=CC5=C(C6=CC=C(F)C=C6)C7=CC=CC=C7N=C5C8CC8)CC([O-])=O	4.96	2	4	16
S1760	Rifapentine	2	g3	in 10mM DMSO	FDA,CFDA,NDC	Martindale:The Extra Pharmacopoeia	021024	Infection/Respiratory Disease	DNA/RNA Synthesis	DNA Damage	Rifapentine is an antibiotic, which inhibits DNA-dependent RNA polymerase activity, used to treat tuberculosis.	877.03	61379-65-5	100	114.02	<1		http://selleckchem.com/products/Rifapentine(Priftin).html	C47H64N4O12	free base	MDL473	COC1\C=C\OC2(C)OC3=C(C2=O)C4=C(O)C(=C(NC(=O)\C(=C\C=C\C(C)C(O)C(C)C(O)C(C)C(OC(C)=O)C1C)C)C(=C4C(=C3C)O)O)\C=N\N5CCN(CC5)C6CCCC6	4.664	8	6	6
S1761	Suprofen	2	i3	in 10mM DMSO	FDA,DMF,PMDA	USP42-NF37;Martindale:The Extra Pharmacopoeia	019387	Inflammation	COX	Neuronal Signaling	Suprofen is a dual COX-1/COX-2 inhibitor, used as a non-steroidal anti-inflammatory analgesic and antipyretic.	260.31	40828-46-4	52	199.76	<1		http://selleckchem.com/products/Suprofen(Profenal).html	C14H12O3S	free base	N/A	CC(C(O)=O)C1=CC=C(C=C1)C(=O)C2=CC=CS2	3.314	2	0	4
S1762	Pyrazinamide	2	k3	in 10mM DMSO	FDA,DMF,CFDA,NDC,PMDA,HMA	USP42-NF37;BP2019;KP Ⅹ;EP9.2;JP17;Ph.Int_6th;IP2010;Martindale:The Extra Pharmacopoeia	080157,081319	Infection	Anti-infection	Microbiology	Pyrazinamide is an agent used to treat tuberculosis.	123.11	98-96-4	25	203.07	12	97.47	http://selleckchem.com/products/Pyrazinamide(Pyrazinoic-acid-amide).html	C5H5N3O	free base	Pyrazinoic Acid Amide	NC(=O)C1=NC=CN=C1	-1.041	3	1	1
S1763	Quetiapine Fumarate	2	m3	in 10mM DMSO	FDA,DMF,CFDA,NDC,PMDA,HMA	USP42-NF37;BP2019;EP9.6;JP17;IP2010;Martindale:The Extra Pharmacopoeia	077380,077745,078679,090120,090323,090482,090681,090749,090757,090960,091388,200363,201109,201190,201504,201762,202152,202228,202674,202939,203150,203359,203390,204203,204253,206252,206260,207655,208947,209497,209635,211405	Neurological Disease	Dopamine Receptor	Neuronal Signaling	Quetiapine Fumarate is an atypical antipsychotic used in the treatment of schizophrenia, bipolar I mania, bipolar II depression, bipolar I depression and shows affinity for various neurotransmitter receptors including serotonin, dopamine, histamine, and adrenergic receptors.	883.09	111974-72-2	36	40.77	<1		http://selleckchem.com/products/Quetiapine-fumarate(Seroquel).html	C46H54N6O8S2	Fumarate	ICI-204636	OCCOCCN1CCN(CC1)C2=NC3=CC=CC=C3SC4=C2C=CC=C4.OCCOCCN5CCN(CC5)C6=NC7=CC=CC=C7SC8=C6C=CC=C8.OC(=O)\C=C\C(O)=O	-0.718	6	2	14
S1764	Rifampin	2	o3	in 10mM DMSO	FDA,DMF,CFDA,NDC	USP42-NF37;IP2010	064150,064217,065028,065390,065421,065502,090034,091181,204101,205039,206736	Infection	DNA/RNA Synthesis	DNA Damage	Rifampin is a DNA-dependent RNA polymerase inhibitor, used to treat a number of bacterial infections.	822.94	13292-46-1	100	121.52	<1		http://selleckchem.com/products/Rifampin(Rifadin).html	C43H58N4O12	free base	Rimactane	COC1\C=C\OC2(C)OC3=C(C2=O)C4=C(O)C(=C(NC(=O)\C(=C\C=C\C(C)C(O)C(C)C(O)C(C)C(OC(C)=O)C1C)C)C(=C4C(=C3C)O)O)\C=N\N5CCN(C)CC5	3.262	8	6	5
S1768	Cefditoren Pivoxil	2	a5	in 10mM DMSO	FDA,DMF,CFDA,NDC,PMDA,HMA	KP Ⅹ;JP17;USP32-NF27;Martindale:The Extra Pharmacopoeia	021222	Infection	Anti-infection	Microbiology	Cefditoren Pivoxil is a broad-spectrum antibiotic against Gram-negative and Gram-positive bacteria.	620.72	117467-28-4	100	161.1	<1		http://selleckchem.com/products/Cefditoren-pivoxil.html	C25H28N6O7S3	free base	ME-1207	CO\N=C(/C(=O)NC1C2SCC(=C(N2C1=O)C(=O)OCOC(=O)C(C)(C)C)\C=C/C3=C(C)N=CS3)C4=CSC(=N4)N	1.926	10	2	12
S1770	Sulfadiazine	2	c5	in 10mM DMSO	FDA,DMF,CFDA,NDC,PMDA	USP42-NF37;BP2019;KP Ⅹ;EP9.2;Ph.Int_6th;JP17;Martindale:The Extra Pharmacopoeia	004054,004122,004125,040091,080081,080084,080088	Infection	Anti-infection	Microbiology	Sulfadiazine is a sulfonamide antibiotic.	250.28	68-35-9	50	199.78	<1		http://selleckchem.com/products/Sulfadiazine.html	C10H10N4O2S	free base	N/A	NC1=CC=C(C=C1)[S](=O)(=O)NC2=NC=CC=N2	0.313	4	2	3
S1771	Chlorprothixene	2	e5	in 10mM DMSO	FDA,CFDA	EP9.8;BP2019;Martindale:The Extra Pharmacopoeia	012486,012487,016149	Psychotic disorders	Dopamine Receptor	Neuronal Signaling	Chlorprothixene has strong binding affinities to dopamine and histamine receptors, such as D1, D2, D3, D5, H1, 5-HT2, 5-HT6 and 5-HT7, with Ki of 18 nM, 2.96 nM, 4.56 nM, 9 nM, 3.75 nM, 9.4 nM, 3 nM and 5.6 nM, respectively.	315.86	113-59-7	6	19	<1		http://selleckchem.com/products/Chlorprothixene.html	C18H18ClNS	free base	N/A	CN(C)CC/C=C1/C2=CC=CC=C2SC3=C1C=C(Cl)C=C3	5.123	0	0	3
S1773	Oxytetracycline (Terramycin)	2	g5	in 10mM DMSO	FDA,DMF,CFDA,PMDA	EP9.2;JP17;BP2017;USP40-NF35;Ph.Int_5th ;IP2010;Martindale:The Extra Pharmacopoeia	050286,050287,060567,060586,060595	Infection	Anti-infection	Others	Oxytetracycline is a broad-spectrum tetracycline antibiotic, used to treat infections with bacteria.	460.43	79-57-2	92	199.81	<1		http://selleckchem.com/products/Oxytetracycline(Terramycin).html	C22H24N2O9	free base	N/A	CN(C)C1C2C(O)C3C(=C(O)C4=C(C=CC=C4O)C3(C)O)C(=O)C2(O)C(=O)C(=C1O)C(N)=O	-1.904	3	5	2
S1774	Thioguanine	2	i5	in 10mM DMSO	FDA,NDC	USP42-NF37	012429	Cancer/Hematology	DNA Methyltransferase	Epigenetics	Thioguanine, a purine antimetabolite, inhibits DNMT1 activity through ubiquitin-targeted degradation, used in the treatment of acute lymphoblastic leukemia, autoimmune disorders (e.g., Crohn's disease, rheumatoid arthritis) and organ transplant recipients.	167.19	154-42-7	9	53.83	<1		http://selleckchem.com/products/Thioguanine.html	C5H5N5S	free base	N/A	NC1=NC(=S)C2=C(N1)N=C[NH]2	0.236	2	3	0
S1775	Thiotepa	2	k5	in 10mM DMSO	FDA,DMF,EMA,CFDA,NDC	USP42-NF37;BP2019;KP Ⅹ;Martindale:The Extra Pharmacopoeia	011683,075547,075698,075730,209150,210337	Cancer	Others	Others	Thiotepa(Thioplex) is an alkylating agent used to treat cancer.	189.22	52-24-4	100	528.49	100	528.49	http://selleckchem.com/products/thiotepa-thioplex.html	C6H12N3PS	free base	Tiofosyl, Tiofosfamid, Triethylenethiophosphoramide	S=[P](N1CC1)(N2CC2)N3CC3	-0.762	0	0	3
S1776	Toremifene Citrate	2	m5	in 10mM DMSO	FDA,DMF,CFDA,NDC,PMDA	Martindale:The Extra Pharmacopoeia	208813	Cancer	Estrogen/progestogen Receptor	Endocrinology & Hormones	Toremifene Citrate is an oral selective estrogen receptor modulator (SERM), used in the treatment of advanced breast cancer.	598.08	89778-27-8	100	167.2	<1		http://selleckchem.com/products/Toremifene-Citrate(Fareston).html	C32H36ClNO8	Citrate	NSC 613680	CN(C)CCOC1=CC=C(C=C1)\C(=C(CCCl)/C2=CC=CC=C2)C3=CC=CC=C3.OC(=O)CC(O)(CC(O)=O)C(O)=O	1.945	4	0	14
S1777	Ethionamide	2	o5	in 10mM DMSO	FDA,DMF,NDC,PMDA	USP42-NF37;BP2019;EP9.2;KP Ⅹ;Ph.Int_6th;JP17;Martindale:The Extra Pharmacopoeia	013026	Infection	Anti-infection	Microbiology	Ethionamide is an antibiotic used in the treatment of tuberculosis.	166.24	536-33-4	33	198.51	<1		http://selleckchem.com/products/Ethionamide.html	C8H10N2S	free base	Bayer 5312	CCC1=NC=CC(=C1)C(N)=S	1.498	1	1	2
S1778	Trifluridine	2	a7	in 10mM DMSO	FDA,DMF,EMA,NDC	USP42-NF37;BP2019;Martindale:The Extra Pharmacopoeia	074311,205438	Infection/Ophthalmology	DNA/RNA Synthesis	DNA Damage	Trifluridine is an anti-herpesvirus antiviral agent by interacting viral DNA replication, used primarily on the eye.	296.2	70-00-8	59	199.19	59	199.19	http://selleckchem.com/products/Trifluridine(Viroptic).html	C10H11F3N2O5	free base	NSC 529182, NSC 75520	OCC1OC(CC1O)N2C=C(C(=O)NC2=O)C(F)(F)F	-0.782	3	3	3
S1782	Azacitidine	2	c7	in 10mM DMSO	FDA,DMF,EMA,NDC,PMDA	Martindale:The Extra Pharmacopoeia	201537,204949,207234,207475,207518,208216,209540,210748	Cancer	DNA Methyltransferase	DNA Damage	Azacitidine is a nucleoside analogue of cytidine that specifically inhibits DNA methylation by trapping DNA methyltransferases.	244.2	320-67-2	48	196.56	<1		http://selleckchem.com/products/Azacitidine(Vidaza).html	C8H12N4O5	free base	NSC 102816	NC1=NC(=O)N(C=N1)C2OC(CO)C(O)C2O	-2.505	4	4	2
S1784	Vidarabine	2	e7	in 10mM DMSO	FDA,DMF,CFDA,PMDA	USP36-NF31;Martindale:The Extra Pharmacopoeia	050486,050523	Infection	DNA/RNA Synthesis	DNA Damage	Vidarabine is an antiviral drug by interfering with the synthesis of viral DNA, used to treat herpes simplex and varicella zoster viruses.	267.24	5536-17-4	53	198.32	3	11.23	http://selleckchem.com/products/Vidarabine(Vira-A).html	C10H13N5O4	free base	N/A	NC1=C2N=C[N](C3OC(CO)C(O)C3O)C2=NC=N1	-1.881	4	4	2
S1786	Verteporfin	2	g7	in 10mM DMSO	FDA,DMF,EMA,NDC,PMDA	USP42-NF37;Martindale:The Extra Pharmacopoeia	021119	Angiology/Cancer/Ophthalmology	VDA,Hippo pathway	Angiogenesis	Verteporfin is a small molecule that inhibits TEAD–YAP association and YAP-induced liver overgrowth. It is also a potent second-generation photosensitizing agent derived from porphyrin.	718.79	129497-78-5	100	139.12	<1		http://selleckchem.com/products/Verteporfin(Visudyne).html	C41H42N4O8	free base	CL 318952	COC(=O)CCC1=C(C)C2=CC3=NC(=CC4=C(C)C(=C([NH]4)C=C5N=C(C=C1[NH]2)C(=C5C)CCC(O)=O)C=C)C6=CC=C(C(C(=O)OC)C36C)C(=O)OC	7.789	9	2	12
S1787	Teniposide	2	i7	in 10mM DMSO	FDA,DMF,CFDA,NDC	USP42-NF37;Martindale:The Extra Pharmacopoeia	020119	Cancer/Hematology	Topoisomerase	DNA Damage	Teniposide is a chemotherapeutic medication mainly used in the treatment of childhood acute lymphocytic leukemia (ALL).	656.65	29767-20-2	40	60.92	<1		http://selleckchem.com/products/Teniposide(Vumon).html	C32H32O13S	free base	NSC 122819, VM-26	COC1=CC(=CC(=C1O)OC)C2C3C(COC3=O)C(OC4OC5COC(OC5C(O)C4O)C6=CC=CS6)C7=CC8=C(OCO8)C=C27	2.516	10	3	6
S1789	Tetrabenazine (Xenazine)	2	k7	in 10mM DMSO	FDA,DMF,NDC,PMDA,HMA	Martindale:The Extra Pharmacopoeia	204574,206129,206686,207682,208826,209284,209739,210544	Neurological Disease	Dopamine Receptor	Neuronal Signaling	Tetrabenazine(Nitoman, Xenazine) acts primarily as a reversible high-affinity inhibitor of mono-amine uptake into granular vesicles of presynaptic neurons by binding selectively to VMAT-2 Also blocks dopamine D2 receptors, but this affinity is 1,000-fold lower than its affinity for VMAT-2.	317.42	58-46-8	58	182.72	<1		http://selleckchem.com/products/Tetrabenazine(Nitoman).html	C19H27NO3	free base	N/A	COC1=CC2=C(C=C1OC)C3CC(=O)C(CC(C)C)CN3CC2	3.365	3	0	4
S1790	Rifaximin	2	m7	in 10mM DMSO	FDA,DMF,CFDA,NDC,PMDA,HMA	BP2019;EP9.2;KP Ⅹ;Martindale:The Extra Pharmacopoeia	021361,022554	Infection	DNA/RNA Synthesis	DNA Damage	Rifaximin is a RNA synthesis inhibitor by binding the β subunit of the bacterial DNA-dependent RNA polymerase, used to treat traveler's diarrhea caused by certain bacteria.	785.88	80621-81-4	47	59.81	<1		http://selleckchem.com/products/Rifaximin(Xifaxan).html	C43H51N3O11	free base	N/A	COC1\C=C\OC2(C)OC3=C(C2=O)C4=C(C(=C3C)O)C(=C(NC(=O)\C(=C/C=C/C(C)C(O)C(C)C(O)C(C)C(OC(C)=O)C1C)C)C5=C4N=C6C=C(C)C=C[N]56)O	4.805	8	5	3
S1791	Bacitracin Zinc	2	o7	in 10mM DMSO	FDA,NDC,DMF	Martindale the Extra Pharmacopoei,EP8.8,USP42-NF37,KP Ⅹ,BP2017,Ph.Int_5th	6.40281e+16	Infection	Anti-infection	Microbiology	Bacitracin is an antibiotic that interferes with the dephosphorylation of C55-isoprenyl pyrophosphate, a membrane carrier molecule that transports the building-blocks of the peptidoglycan bacterial cell wall outside of the inner membrane. It inhibits cleavage of Tyr from Met-enkephalin with IC50 of 10 μM.	1486.07	1405-89-6	100	67.29	<1		http://www.selleck.cn/products/bacitracin-zinc.html	C66H101N17O16SZn	Free Base	N/A	[Zn++].CCC(C)C(N)C1=NCC(S1)C(=O)NC(CC(C)C)C(=O)NC(CCC([O-])=O)C(=O)NC(C(C)CC)C(=O)NC2CCCCNC(=O)C(CC(N)=O)NC(=O)C(CC([O-])=O)NC(=O)C(CC3=C[NH]C=N3)NC(=O)C(CC4=CC=CC=C4)NC(=O)C(NC(=O)C(CCCN)NC2=O)C(C)CC	-3.993	14	15	31
S1792	Simvastatin	2	a9	in 10mM DMSO	FDA,DMF,EMA,HMA,CFDA,NDC,PMDA	USP42-NF37;EP9.7;BP2019;KP Ⅹ;JP17;Martindale:The Extra Pharmacopoeia	021961,076052,076285,076532,076685,077691,077752,077766,077837,078034,078103,078155,078735,090383,090868,200895,206557	Cardiovascular Disease	HMG-CoA Reductase	Metabolism	Simvastatin is a competitive inhibitor of HMG-CoA reductase with Ki of 0.1-0.2 nM in cell-free assays.	418.57	79902-63-9	83	198.29	<1		http://selleckchem.com/products/Simvastatin(Zocor).html	C25H38O5	free base	MK-0733	CCC(C)(C)C(=O)OC1CC(C)C=C2C=CC(C)C(CCC3CC(O)CC(=O)O3)C12	4.634	4	1	7
S1793	Ramipril	2	c9	in 10mM DMSO	FDA,DMF,CFDA,NDC,HMA	USP42-NF37;EP9.8;;BP2019;KP Ⅹ;IP2010;Martindale:The Extra Pharmacopoeia	076549,077004,077470,077513,077514,077626,077900,078191,078745,078832,078849,079116,090650,090697,091069,091604,202392	Cardiovascular Disease/Endocrinology/Metabolic Disease	RAAS	Endocrinology & Hormones	Ramipril is an angiotensin-converting enzyme (ACE) inhibitor with IC50 of 5 nM.	416.51	87333-19-5	83	199.27	<1		http://selleckchem.com/products/Ramipril(Altace).html	C23H32N2O5	free base	N/A	CCOC(=O)C(CCC1=CC=CC=C1)NC(C)C(=O)N2C3CCCC3CC2C(O)=O	0.308	4	1	10
S1794	Fenofibrate	2	e9	in 10mM DMSO	FDA,DMF,EMA,HMA,CFDA,NDC,PMDA	USP42-NF37;BP2019;KP Ⅹ;EP9.2;IP2010;Martindale:The Extra Pharmacopoeia	076433,076509,076520,076635,090715,090856,200579,200884,201748,202856,204019,204475,204598,205118,207803,208709,209660,209950,209951,210138,210606,211080	Cardiovascular Disease	PPAR	Metabolism	Fenofibrate (Tricor, Trilipix) is a compound of the fibrate class and fibric acid derivative.	360.83	49562-28-9	72	199.54	<1		http://selleckchem.com/products/Fenofibrate(Tricor).html	C20H21ClO4	free base	N/A	CC(C)OC(=O)C(C)(C)OC1=CC=C(C=C1)C(=O)C2=CC=C(Cl)C=C2	5.111	4	0	7
S1799	Ranolazine	2	g9	in 10mM DMSO	FDA,DMF,EMA,NDC	Martindale:The Extra Pharmacopoeia	201046,208174,208862,209081,210054,211291,211707	Cardiovascular Disease	Calcium Channel	Transmembrane Transporters	Ranolazine is a calcium uptake inhibitor via the sodium/calcium channel, used to treat chronic angina.	427.54	95635-55-5	86	201.15	<1		http://selleckchem.com/products/Ranolazine(Ranexa).html	C24H33N3O4	Free Base	CVT 303, RS 43285-003	COC1=CC=CC=C1OCC(O)CN2CCN(CC2)CC(=O)NC3=C(C)C=CC=C3C	2.991	3	2	9
S1801	Ranitidine Hydrochloride	2	i9	in 10mM DMSO	FDA,DMF,CFDA,NDC,PMDA,HMA	USP42-NF37;BP2019;EP9.6;KP Ⅹ;JP17;IP2010;Martindale:The Extra Pharmacopoeia	074023,074467,074488,074552,074655,074662,074680,074764,074777,074864,075000,075094,075132,075165,075167,075180,075208,075212,075254,075294,075296,075439,075497,075519,075557,075564,075742,076124,076195,076705,076760,077405,077426,077458,077476,077602,077824,078192,078312,078448,078542,078653,078684,078701,078884,078890,079076,079211,079212,090054,090102,090623,091078,091091,091288,091429,091534,…	Gastrointestinal Disease	Histamine Receptor	Neuronal Signaling	Ranitidine is a histamine H2-receptor antagonist, used to treat stomach or intestinal ulcers.	350.86	66357-59-3	70	199.51	70	199.51	http://selleckchem.com/products/Ranitidine-hydrochloride(Zantac).html	C13H23ClN4O3S	Hydrochloride	AH19065	Cl.CNC(/NCCSCC1=CC=C(CN(C)C)O1)=C\[N+]([O-])=O	1.421	1	2	10
S1805	Acetylcholine Chloride	2	k9	in 10mM DMSO	FDA,DMF,NDC,PMDA	Martindale the Extra Pharmacopoei,EP8.8,USP42-NF37,BP2017,KP Ⅹ,JP17	16211020213	Ophthalmology	AChR	Neuronal Signaling	The chemical compound Acetylcholine Chloride is a neurotransmitter in both the peripheral nervous system (PNS) and central nervous system (CNS) in many organisms including humans.	181.66	60-31-1	36	198.17	36	198.17	http://www.selleck.cn/products/Acetylcholine-chloride.html	C7H16NO2.Cl	Chloride	N/A	[Cl-].CC(=O)OCC[N+](C)(C)C	-3.869	2	0	4
S1806	Acipimox	2	m9	in 10mM DMSO	CFDA	Martindale:The Extra Pharmacopoeia	N/A	Cardiovascular Disease	Others	Others	Acipimox is a niacin derivative used as a hypolipidemic agent.	154.12	51037-30-0	31	201.14	<1		http://selleckchem.com/products/Acipimox.html	C6H6N2O3	free base	Olbemox	CC1=CN=C(C=[N+]1[O-])C(O)=O	-0.975	2	0	1
S1807	Aciclovir	2	o9	in 10mM DMSO	DMF,CFDA,PMDA,HMA	BP2019;EP9.2;Ph.Int_6th;JP17;IP2010;CP2005;EP9.1;BP2017 USP42-NF37;BP2019;EP9.2;Martindale:The Extra Pharmacopoeia	N/A	Infection	Anti-infection	Microbiology	Aciclovir is a synthetic nucleoside analogue active against herpesviruses.	225.2	59277-89-3	45	199.82	<1		http://selleckchem.com/products/Acyclovir(Aciclovir).html	C8H11N5O3	free base	Acyclovir	NC1=NC2=C(N=C[N]2COCCO)C(=O)N1	-1.423	4	3	4
S1808	Nifedipine	2	a11	in 10mM DMSO	FDA,DMF,CFDA,NDC,PMDA,HMA	USP42-NF37;BP2019;KP Ⅹ;EP9.2;Ph.Int_6th;JP17;IP2010;Martindale:The Extra Pharmacopoeia	072409,072556,072579,072651,072781,073250,073421,074045,075108,075269,075289,075414,076070,077127,077899,090602,090649,201071,202644,202987,203126,210012,210184,210614,210838	Cardiovascular Disease	Calcium Channel	Transmembrane Transporters	Nifedipine is a dihydropyridine calcium channel blocker, used to lower hypertension and to treat angina.	346.33	21829-25-4	69	199.23	<1		http://selleckchem.com/products/Nifedipine(Adalat).html	C17H18N2O6	free base	N/A	COC(=O)C1=C(C)NC(=C(C1C2=C(C=CC=C2)[N+]([O-])=O)C(=O)OC)C	1.766	4	1	6
S1811	Amiloride HCl	2	c11	in 10mM DMSO	FDA,DMF,CFDA,NDC,HMA	USP42-NF37;EP9.7;BP2019;Ph.Int_6th;IP2010;Martindale:The Extra Pharmacopoeia	070346,079133,204180	Cardiovascular Disease/Metabolic Disease	Sodium Channel,Calcium Channel	Transmembrane Transporters	Amiloride is a selective T-type calcium channel blocker, an epithelial sodium channel blocker and a selective inhibitor of urokinase plasminogen activator (uPA)(Ki=7 μM).	266.09	2016-88-8	53	199.18	6	22.55	http://selleckchem.com/products/Amiloride-hydrochloride(Midamor).html	C6H9Cl2N7O	Hydrochloride	N/A	Cl.NC(=N)NC(=O)C1=NC(=C(N)N=C1N)Cl	-0.366	3	4	2
S1813	Amlodipine Besylate	2	e11	in 10mM DMSO	FDA,DMF,EMA,CFDA,NDC	USP42-NF37;BP2019;KP Ⅹ;EP9.2;JP17;IP2010;Martindale:The Extra Pharmacopoeia	022026,076418,076692,076719,076846,076859,077073,077080,077262,077333,077362,077516,077671,077759,077771,077955,077974,078021,078043,078081,078131,078224,078226,078231,078414,078453,078477,078500,078552,078573,078925,090752,201380,202553,203245,204900,206367,206524,207821	Cardiovascular Disease	Calcium Channel	Transmembrane Transporters	Amlodipine Besylate is a long-acting calcium channel blocker, used to lower blood pressure and prevent chest pain.	567.05	111470-99-6	113	199.28	<1		http://selleckchem.com/products/Amlodipine-besylate(Norvasc).html	C26H31ClN2O8S	Besylate	N/A	CCOC(=O)C1=C(COCCN)NC(=C(C1C2=C(Cl)C=CC=C2)C(=O)OC)C.O[S](=O)(=O)C3=CC=CC=C3	2.739	5	2	11
S1816	Chlorpheniramine Maleate	2	g11	in 10mM DMSO	FDA,DMF,CFDA,NDC,PMDA	USP42-NF37;KP Ⅹ;JP17;IP2010	040829,070797,080626,080696,080700,080779,080786,080791,080797,080809,080821,080938,080961,083062,083078,083243,083593,083753,083787,085104,085139,085837,086095,086096,086306,086519,086941,087164,087520,088556	Immunology/Inflammation	Histamine Receptor	Neuronal Signaling	Chlorpheniramine (Chlorpheniramine maleate, Chlorphenamine) is an histamine H1 receptor antagonist with IC50 of 12 nM.	390.86	113-92-8	78	199.56	78	199.56	http://selleckchem.com/products/Chlorpheniramine-maleate.html	C20H23ClN2O4	Maleate	NCI-C55265	CN(C)CCC(C1=CC=C(Cl)C=C1)C2=NC=CC=C2.OC(=O)\C=C/C(O)=O	0.7	3	0	7
S1820	Clofibrate	2	i11	in 10mM DMSO	FDA,DMF,CFDA,PMDA	Martindale the Extra Pharmacopoei,EP8.8,USP42-NF37,KP Ⅹ,JP17,BP2017	7.05311e+28	Cardiovascular Disease	Others	Others	Clofibrate (Atromid-S), a fibric acid derivative used in the treatment of hyperlipoproteinemia type III and severe hypertriglyceridemia.	242.7	637-07-0	7	28.84	<1		http://www.selleck.cn/products/Clofibrate(Atromid-S).html	C12H15ClO3	Free Base		CCOC(=O)C(C)(C)OC1=CC=C(Cl)C=C1	3.329	3	0	5
S1823	Fenoprofen Calcium	2	k11	in 10mM DMSO	FDA,DMF,CFDA,NDC	USP42-NF37;BP2019;KP Ⅹ;Martindale:The Extra Pharmacopoeia	071738,072165,072194,072214,072267,072274,072293,072294,072307,072308,072309,072326,072355,072356,072357,072362,072394,072395,072396,072407,072429,072437,072438,072472,072557,072602,072902,072946,072981,072982	Immunology/Inflammation	Immunology & Inflammation related	Immunology & Inflammation	Fenoprofen Calcium is a nonsteroidal, anti-inflammatory antiarthritic agent.	522.6	34597-40-5	105	200.92	<1		http://selleckchem.com/products/fenoprofen-calcium.html	C30H26CaO6	Calcium salt	N/A	[Ca++].CC(C([O-])=O)C1=CC(=CC=C1)OC2=CC=CC=C2.CC(C([O-])=O)C3=CC(=CC=C3)OC4=CC=CC=C4	4.086	2	0	8
S1825	Erdosteine	2	m11	in 10mM DMSO	CFDA,HMA	Martindale:The Extra Pharmacopoeia	N/A	Inflammation	Others	Others	Erdosteine is a mucolytic which is used in treatment of excessive viscous mucus.	249.31	84611-23-4	50	200.55	<1		http://selleckchem.com/products/erdosteine.html	C8H11NO4S2	free base	KW-9144	OC(=O)CSCC(=O)NC1CCSC1=O	-0.382	3	1	5
S1827	Betaxolol HCl	2	o11	in 10mM DMSO	FDA,DMF,CFDA,NDC,PMDA,HMA	USP42-NF37;BP2019;KP Ⅹ;JP17;Martindale:The Extra Pharmacopoeia	075386,075446,075541,075630,078694,078962	Cardiovascular Disease/Ophthalmology	Adrenergic Receptor	Neuronal Signaling	Betaxolol is a β1 adrenergic receptor blocker with IC50 of 6 μM.	343.89	63659-19-8	69	200.65	69	200.65	http://selleckchem.com/products/betaxolol-hydrochloride-betoptic.html	C18H30ClNO3	Hydrochloride	SL 75212 HCl	Cl.CC(C)NCC(O)COC1=CC=C(CCOCC2CC2)C=C1	2.959	2	2	11
S1828	Proparacaine HCl	2	a13	in 10mM DMSO	FDA,DMF,CFDA,NDC	USP42-NF37	040074,040277,084144,084151	Neurological Disease	Sodium Channel	Transmembrane Transporters	Proparacaine HCl is a voltage-gated sodium channels antagonist with ED50 of 3.4 mM.	330.85	5875-06-9	12	36.27	66	199.49	http://selleckchem.com/products/proparacaine-hcl.html	C16H27ClN2O3	Hydrochloride	N/A	Cl.CCCOC1=C(N)C=C(C=C1)C(=O)OCCN(CC)CC	3.013	3	1	10
S1829	Pranlukast	2	c13	in 10mM DMSO	CFDA,PMDA	JP17;Martindale:The Extra Pharmacopoeia	N/A	Immunology	Immunology & Inflammation related	Immunology & Inflammation	Pranlukast is an orally administered, and selective antagonist of the cysteinyl leukotrienes (LT) C(4), LTD(4) and LTE(4), used in the prophylactic treatment of chronic bronchial asthma.	481.5	103177-37-3	11	22.85	<1		http://selleckchem.com/products/pranlukast.html	C27H23N5O4	free base	ONO-1078	O=C(NC1=CC2=C(C=C1)C(=O)C=C(O2)C3=NN=N[NH]3)C4=CC=C(OCCCCC5=CC=CC=C5)C=C4	4.232	7	2	9
S1830	Oxfendazole	2	e13	in 10mM DMSO	N/A	USP42-NF37;BP2019;EP9.8;IP2010;Martindale:The Extra Pharmacopoeia	N/A	Infection	Anti-infection	Microbiology	Oxfendazole is a broad spectrum benzimidazole anthelmintic.	315.35	53716-50-0	10	31.71	<1		http://selleckchem.com/products/oxfendazole.html	C15H13N3O3S	free base	RS-8858	COC(=O)NC1=NC2=C([NH]1)C=C(C=C2)[S](=O)C3=CC=CC=C3	2.657	4	2	4
S1831	Carvedilol	2	g13	in 10mM DMSO	FDA,DMF,CFDA,NDC,PMDA,HMA	USP42-NF37;BP2019;KP Ⅹ;EP9.2;JP17;IP2010;Martindale:The Extra Pharmacopoeia	076373,076649,076989,077316,077346,077474,077614,077780,077887,078165,078217,078227,078240,078251,078332,078384,078786	Cardiovascular Disease	Adrenergic Receptor	Neuronal Signaling	Carvedilol is a non-selective beta blocker/alpha-1 blocker, used to treat congestive heart failure (CHF) and high blood pressure.	406.47	72956-09-3	81	199.28	<1		http://selleckchem.com/products/carvedilol.html	C24H26N2O4	free base	BM-14190, SKF 105517	COC1=CC=CC=C1OCCNCC(O)COC2=C3C(=CC=C2)[NH]C4=C3C=CC=C4	4.014	3	3	10
S1832	Atracurium Besylate	2	i13	in 10mM DMSO	FDA,DMF,NDC,HMA	USP42-NF37;KP Ⅹ	074632,074740,074753,074784,074824,074901,074945,090761,091489,206011,206096	Neurological Disease	AChR	Neuronal Signaling	Atracurium Besylate is a neuromuscular blocking agent with ED95 of 0.2 mg/kg.	1243.48	64228-81-5	100	80.42	33	26.54	http://selleckchem.com/products/atracurium-besylate.html	C65H82N2O18S2	Dibesylate	BW 33A, 51W89	COC1=CC=C(CC2C3=CC(=C(OC)C=C3CC[N+]2(C)CCC(=O)OCCCCCOC(=O)CC[N+]4(C)CCC5=CC(=C(OC)C=C5C4CC6=CC=C(OC)C(=C6)OC)OC)OC)C=C1OC.[O-][S](=O)(=O)C7=CC=CC=C7.[O-][S](=O)(=O)C8=CC=CC=C8	3.646	12	0	28
S1833	Butoconazole nitrate	2	k13	in 10mM DMSO	FDA,DMF,CFDA,NDC	USP42-NF37;Martindale:The Extra Pharmacopoeia	019881	Infection	Anti-infection	Microbiology	Butoconazole nitrate is an anti-fungal agent that inhibits PHA-stimulated release of cytokines-- IL-2, TNFα, IFN and GM-CSF from human peripheral blood lymphocytes (IC50 of 7.2 μg/mL, 14.4 μg/mL, 7.36 μg/mL and 7.6 μg/mL, respectively).	474.79	64872-77-1	95	200.09	<1		http://selleckchem.com/products/butoconazole-nitrate.html	C19H18Cl3N3O3S	Nitrate	RS-35887	O[N+]([O-])=O.ClC1=CC=C(CCC(C[N]2C=CN=C2)SC3=C(Cl)C=CC=C3Cl)C=C1	5.238	1	0	7
S1835	Azithromycin	2	m13	in 10mM DMSO	FDA,DMF,CFDA,NDC,PMDA,HMA	USP42-NF37;EP9.3;KP Ⅹ;JP17;IP2010;Martindale:The Extra Pharmacopoeia	050809,065150,065153,065179,065193,065209,065211,065212,065218,065223,065225,065246,065265,065297,065302,065360,065365,065366,065398,065399,065400,065404,065405,065419,065488,065500,065501,065506,065507,065508,065509,065511,090923,202308,202793,203294,203412,204732,205666,207370,207398,207531,207566,208249,208250,209043,209044,209045,209201,209999,210000,210001,211147	Infection/Parasitology	Anti-infection,Autophagy	Autophagy	Azithromycin is an antibiotic by inhibiting protein synthesis, used for the treatment of bacterial infections.	748.98	83905-01-5	100	133.51	<1		http://selleckchem.com/products/azithromycin-zithromax.html	C38H72N2O12	Free Base	CP-62993, XZ-450	CCC1OC(=O)C(C)C(OC2CC(C)(OC)C(O)C(C)O2)C(C)C(OC3OC(C)CC(C3O)N(C)C)C(C)(O)CC(C)CN(C)C(C)C(O)C1(C)O	2.078	7	3	7
S1836	Albendazole Oxide	2	o13	in 10mM DMSO	FDA,DMF,CFDA,NDC,PMDA,HMA	USP42-NF37;EP9.4;BP2019;KP Ⅹ;Ph.Int_6th;Martindale:The Extra Pharmacopoeia	208094,208979,210011,210434,211117	Infection	Microtubule Associated	Cytoskeletal Signaling	Albendazole is a tubulin polymerization or assembly inhibitor, used for the treatment of a variety of parasitic worm infestations.	281.33	54029-12-8	11	39.1	<1		http://selleckchem.com/products/albendazole-oxide-ricobendazole.html	C12H15N3O3S	free base	Ricobendazole	CCC[S](=O)C1=CC2=C(C=C1)N=C(NC(=O)OC)[NH]2	1.953	4	2	5
S1839	Chloroxine	2	a15	in 10mM DMSO	FDA	Martindale:The Extra Pharmacopoeia	017594	Infection/Inflammation	Anti-infection	Microbiology	Chloroxine is a synthetic antibacterial compound that is effective in the treatment of dandruff and seborrheic dermatitis when incorporated in a shampoo.	214.05	773-76-2	43	200.89	<1		http://selleckchem.com/products/Chloroxine.html	C9H5Cl2NO	free base	N/A	OC1=C(Cl)C=C(Cl)C2=C1N=CC=C2	3.103	1	1	0
S1840	Lomustine	2	c15	in 10mM DMSO	FDA,DMF,CFDA,NDC	USP42-NF37;BP2019;EP9.2;IP2010;Martindale:The Extra Pharmacopoeia	017588	Cancer	DNA/RNA Synthesis	DNA Damage	Lomustine inhibits cancer cells by damaging the DNA and stops cells from dividing.	233.7	13010-47-4	46	196.83	<1		http://selleckchem.com/products/Lomustine(CeeNU).html	C9H16ClN3O2	free base	nsc79037	ClCCN(N=O)C(=O)NC1CCCCC1	2.394	2	1	4
S1843	Chenodeoxycholic Acid	2	e15	in 10mM DMSO	DMF,EMA,CFDA,PMDA	USP42-NF37;BP2019;EP9.2;JP17;Martindale:The Extra Pharmacopoeia	N/A	Gastroenterology	FXR	Others	Chenodeoxycholic Acid is a naturally occurring human bile acid, and inhibits production of cholesterol in the liver and absorption in the intestines.	392.57	474-25-9	79	201.24	<1		http://selleckchem.com/products/Chenodeoxycholic-acid.html	C24H40O4	free base	Chenodiol	CC(CCC(O)=O)C1CCC2C3C(O)CC4CC(O)CCC4(C)C3CCC12C	4.014	1	2	4
S1845	Cimetidine	2	g15	in 10mM DMSO	FDA,DMF,CFDA,NDC,PMDA,HMA	USP42-NF37;EP9.4;BP2019;KP Ⅹ;Ph.Int_6th;JP17;IP2010;Martindale:The Extra Pharmacopoeia	074100,074151,074246,074250,074316,074329,074339,074340,074349,074361,074365,074371,074401,074402,074424,074463,074506,074566,074568,074890,074948,074961,074963,074972,075122,075285,075345,075425	Gastrointestinal Disease	Histamine Receptor	Neuronal Signaling	Cimetidine, a histamine congener, competitively inhibits histamine binding to histamine H2 receptors.	252.34	51481-61-9	51	202.11	<1		http://selleckchem.com/products/Cimetidine(Tagamet).html	C10H16N6S	free base	SKF-92334	CNC(NCCSCC1=C(C)[NH]C=N1)=NC#N	0.007	2	3	7
S1847	Clemastine Fumarate	2	i15	in 10mM DMSO	FDA,NDC,PMDA	USP42-NF37;EP9.3;BP2019;KP Ⅹ;JP17;Martindale:The Extra Pharmacopoeia	073095,073282,073283,073399,073458,073459,074075,074512,074863,074884,075703	Inflammation	Histamine Receptor	Neuronal Signaling	Clemastine Fumarate (Clemastine) is a selective histamine H1 receptor antagonist with IC50 of 3 nM.	459.96	14976-57-9	35	76.09	<1		http://selleckchem.com/products/Clemastine-Fumarate.html	C25H30ClNO5	Fumarate	N/A	CN1CCCC1CCOC(C)(C2=CC=CC=C2)C3=CC=C(Cl)C=C3.OC(=O)\C=C\C(O)=O	1.81	3	0	8
S1848	Curcumin	2	k15	in 10mM DMSO	DMF	EP8.8;BP2016;IP2010;Martindale:The Extra Pharmacopoeia;CP2005	N/A	Cancer/Inflammation/Psychotic disorders	NF-κB,HDAC,Histone Acetyltransferase,Nrf2	Epigenetics	Curcumin is the principal curcuminoid of the popular Indian spice turmeric, which is a member of the ginger family (Zingiberaceae). It is an inhibitor of p300 histone acetylatransferase（IC50~25 μM） and Histone deacetylase activates Nrf2 pathway and supresses the activation of transcription factor NF-κB.	368.38	458-37-7	73	198.16	<1		http://selleckchem.com/products/Curcumin.html	C21H20O6	free base	Diferuloylmethane	COC1=CC(=CC=C1O)/C=C/C(O)=C/C(=O)/C=C/C2=CC(=C(O)C=C2)OC	3.573	3	3	7
S1849	Daidzein	2	m15	in 10mM DMSO	CFDA	BP2019;EP9.2;Martindale:The Extra Pharmacopoeia	N/A	Cardiovascular Disease/Endocrinology	Others	Others	Daidzein is a natural isoflavone phytoestrogen found in Leguminosae, used as a component of foods and dietary supplements.	254.24	486-66-8	51	200.6	<1		http://selleckchem.com/products/Daidzein.html	C15H10O4	free base	N/A	OC1=CC=C(C=C1)C2=COC3=CC(=CC=C3C2=O)O	2.382	2	2	1
S1854	Bifonazole	2	o15	in 10mM DMSO	DMF,CFDA,PMDA,HMA	BP2019;KP Ⅹ;EP9.2;JP17;Martindale:The Extra Pharmacopoeia	N/A	Infection	Anti-infection	Microbiology	Bifonazole is a substituted imidazole antifungal agent.	310.39	60628-96-8	62	199.75	<1		http://selleckchem.com/products/bifonazole.html	C22H18N2	free base	Bay h 4502	C1=CC=C(C=C1)C([N]2C=CN=C2)C3=CC=C(C=C3)C4=CC=CC=C4	4.637	1	0	4
S1855	Pefloxacin Mesylate	2	a17	in 10mM DMSO	CFDA	BP2019;EP9.2;Martindale:The Extra Pharmacopoeia;CP2005	N/A	Infection	Anti-infection	Microbiology	Pefloxacin Mesylate is a synthetic chemotherapeutic agent and an antibacterial agent with IC50 of 6.7 nM.	429.46	70458-95-6	14	32.6	67	156.01	http://selleckchem.com/products/pefloxacin-mesylate.html	C18H24FN3O6S	Mesylate	N/A	CCN1C=C(C(O)=O)C(=O)C2=CC(=C(C=C12)N3CCN(C)CC3)F.C[S](O)(=O)=O	-1.618	2	0	3
S1856	Metoprolol Tartrate	2	c17	in 10mM DMSO	FDA,DMF,CFDA,NDC,PMDA,HMA	USP42-NF37;BP2019;EP9.2;JP17;IP2010;Martindale:The Extra Pharmacopoeia	073288,073289,073654,073666,074032,074133,074141,074143,074217,074258,074333,074380,074453,074644,075160,076495,076670,076704,077360,077739,077761,078085,078459,078950,090317,090386,091045,091307,200981,202871,204205	Cardiovascular Disease	Adrenergic Receptor	Neuronal Signaling	Metoprolol Tartrate is a selective β1 receptor blocker medication, used to treat hypertension and heart failure.	684.81	56392-17-7	100	146.03	100	146.03	http://selleckchem.com/products/metoprolol-tartrate.html	C34H56N2O12	Tartrate	CGP 2175E	COCCC1=CC=C(OCC(O)CNC(C)C)C=C1.COCCC2=CC=C(OCC(O)CNC(C)C)C=C2.OC(C(O)C(O)=O)C(O)=O	-3.559	6	6	21
S1858	Dienestrol	2	e17	in 10mM DMSO	FDA	EP7.5;USP39-NF34;IP2010;Martindale:The Extra Pharmacopoeia	006110	Endocrinology	Others	Others	Dienestrol(Restrol) is a synthetic, non-steroidal estrogen. It is an estrogen receptor agonist.	266.33	84-17-3	53	199	-1		http://www.selleckchem.com/products/Dienestrol(Restrol).html	C18H18O2	Free Base	Restrol	C/C=C(C1=CC=C(O)C=C1)/C(=C/C)C2=CC=C(O)C=C2	4.692	0	2	3
S1859	Diethylstilbestrol	2	g17	in 10mM DMSO	FDA,DMF,CFDA	USP42-NF37;BP2019;EP9.2;CP2005;Martindale:The Extra Pharmacopoeia	004039,004040,004041	Cancer	Estrogen/progestogen Receptor	Endocrinology & Hormones	Diethylstilbestrol is a synthetic nonsteroidal estrogen, used to prevent miscarriage and other pregnancy complications.	268.35	56-53-1	54	201.23	<1		http://selleckchem.com/products/Diethylstilbestrol(Stilbestrol).html	C18H20O2	free base	Stilbestrol	CCC(/C1=CC=C(O)C=C1)=C(CC)\C2=CC=C(O)C=C2	5.137	0	2	4
S1865	Diltiazem HCl	2	i17	in 10mM DMSO	FDA,DMF,CFDA,NDC,PMDA,HMA	USP42-NF37;BP2019;KP Ⅹ;EP9.2;JP17;IP2010;Martindale:The Extra Pharmacopoeia	020939,072838,074051,074067,074079,074084,074093,074168,074185,074617,074845,074852,074894,074910,074941,074943,074984,075004,075086,075106,075116,075124,075375,075749,075853,076563,077686,078538,090421,090492,091022,202463,202651,203023,205231,206534,206641,209766	Cardiovascular Disease	Calcium Channel	Transmembrane Transporters	Diltiazem HCl (Tiazac) is a benzothiazepine derivative with vasodilating action due to its antagonism of the actions of the calcium ion in membrane functions.	450.98	33286-22-5	90	199.57	90	199.57	http://selleckchem.com/products/Diltiazem-HCl(Tiazac).html	C22H27ClN2O4S	Hydrochloride	RG 83606 HCl	Cl.COC1=CC=C(C=C1)C2SC3=C(C=CC=C3)N(CCN(C)C)C(=O)C2OC(C)=O	3.475	4	0	7
S1866	Diphenhydramine HCl	2	k17	in 10mM DMSO	FDA,DMF,CFDA,NDC,PMDA,HMA	USP42-NF37;BP2019;KP Ⅹ;EP9.2;JP17;Martindale:The Extra Pharmacopoeia;CP2005	040140,040466,040498,070497,072416,073611,080519,080577,080592,080596,080635,080643,080727,080728,080738,080762,080800,080807,080817,080822,080832,080845,080868,080873,080939,083027,083061,083063,083087,083088,083183,083237,083275,083441,083533,083567,083634,083674,083797,083953,084506,084524,085083,085138,085150,085156,085287,085621,085701,085874,086543,086544,086874,086875,086937,087066,087513,…	Immunology/Neurological Disease	Histamine Receptor	Neuronal Signaling	Diphenhydramine HCl is a first-generation histamine H1 receptor antagonist, used in various allergic conditions such as rhinitis, urticaria and conjunctivitis.	291.82	147-24-0	58	198.75	58	198.75	http://selleckchem.com/products/Diphenhydramine-hydrochloride(Benadryl).html	C17H22ClNO	Hydrochloride	N/A	Cl.CN(C)CCOC(C1=CC=CC=C1)C2=CC=CC=C2	3.766	1	0	6
S1869	Dapoxetine HCl	2	m17	in 10mM DMSO	DMF,HMA	Martindale:The Extra Pharmacopoeia	N/A	Others	5-HT Receptor	Neuronal Signaling	Dapoxetine HCl is a short-acting novel selective serotonin reuptake inhibitor, used for the treatment of premature ejaculation.	341.87	129938-20-1	68	198.91	68	198.91	http://selleckchem.com/products/Dapoxetine-hydrochloride(Priligy).html	C21H24ClNO	Hydrochloride	LY-210448	Cl.CN(C)C(CCOC1=C2C=CC=CC2=CC=C1)C3=CC=CC=C3	4.917	1	0	6
S1876	Valaciclovir HCl	2	o17	in 10mM DMSO	DMF,CFDA,PMDA,HMA	EP9.8;BP2019;JP17;Martindale:The Extra Pharmacopoeia	N/A	Infection	Anti-infection	Microbiology	Valaciclovir HCl, an aciclovir prodrug, inhibits activity of virus DNA polymerase, used to treat infections caused by herpes simplex virus (HSV) and varicella zoster virus, and for prophylaxis against cytomegalovirus (CMV).	360.8	124832-27-5	14	38.8	72	199.56	http://selleckchem.com/products/valaciclovir-hcl.html	C13H21ClN6O4	Hydrochloride	N/A	Cl.CC(C)C(N)C(=O)OCCOC[N]1C=NC2=C1N=C(N)NC2=O	-0.296	6	3	8
S1878	Ganciclovir	2	a19	in 10mM DMSO	FDA,DMF,EMA,HMA,CFDA,NDC,PMDA	USP41-NF36;BP2019;EP9.2;Martindale:The Extra Pharmacopoeia;CP2005	076457,090658,202624,204204,204560,204950,209347	Infection	Anti-infection	Microbiology	Ganciclovir is an antiviral drug for feline herpesvirus type-1 with IC50 of 5.2 μM in a cell-free assay.	255.23	82410-32-0	27	105.79	<1		http://selleckchem.com/products/ganciclovir.html	C9H13N5O4	free base	RS-21592, BW-759	NC1=NC2=C(N=C[N]2COC(CO)CO)C(=O)N1	-1.934	4	4	5
S1880	Roxatidine Acetate HCl	2	c19	in 10mM DMSO	CFDA,PMDA	JP17;Martindale:The Extra Pharmacopoeia	N/A	Gastroenterology	Histamine Receptor	Neuronal Signaling	Roxatidine Acetate HCl is a specific and competitive histamin H2-receptor antagonist, with IC50 of 3.2 μM, inhibits gastric acid secretion and ulcer formation.	384.9	93793-83-0	77	200.05	77	200.05	http://selleckchem.com/products/roxatidine-acetate-hcl.html	C19H29ClN2O4	Hydrochloride	N/A	Cl.CC(=O)OCC(=O)NCCCOC1=CC=CC(=C1)CN2CCCCC2	2.148	4	1	10
S1881	Protionamide	2	e19	in 10mM DMSO	CFDA	Ph.Int_6th;Martindale:The Extra Pharmacopoeia	N/A	Infection	Anti-infection	Microbiology	Protionamide is a drug used in the treatment of tuberculosis.	180.27	14222-60-7	36	199.7	<1		http://selleckchem.com/products/protionamide-prothionamide.html	C9H12N2S	free base	Prothionamide, 1321-TH	CCCC1=NC=CC(=C1)C(N)=S	1.954	1	1	3
S1883	Idoxuridine	2	g19	in 10mM DMSO	FDA,DMF,CFDA	USP42-NF37;BP2019;KP Ⅹ;EP9.2;Ph.Int_6th;IP2010;Martindale:The Extra Pharmacopoeia	014169,013935,013934,015868	Infection	Anti-infection	Microbiology	Idoxuridine is an antiviral agent for feline herpesvirus type-1 with IC50 of 4.3 μM.	354.1	54-42-2	35	98.84	<1		http://selleckchem.com/products/idoxuridine.html	C9H11IN2O5	free base	NSC 39661, SKF 14287	OCC1OC(CC1O)N2C=C(I)C(=O)NC2=O	-1.402	3	3	2
S1884	Sparfloxacin	2	i19	in 10mM DMSO	FDA,CFDA	Martindale:The Extra Pharmacopoeia;CP2005	020677	Infection	Anti-infection	Microbiology	Sparfloxacin is a fluoroquinolone antibiotic, shows broad and potent antibacterial activity.	392.4	110871-86-8	9	22.94	<1		http://selleckchem.com/products/sparfloxacin.html	C19H22F2N4O3	free base	AT-4140,CI-978,PD 131501	CC1CN(CC(C)N1)C2=C(F)C3=C(C(=C2F)N)C(=O)C(=CN3C4CC4)C(O)=O	-1.056	2	2	3
S1885	Felodipine	2	k19	in 10mM DMSO	FDA,DMF,CFDA,NDC,PMDA,HMA	USP42-NF37;BP2019;KP Ⅹ;EP9.2;IP2010;Martindale:The Extra Pharmacopoeia;CP2005	075896,078855,090365,091200,091484,200815,201964,202170,203032,203417,203983,204800,210847	Cardiovascular Disease	Calcium Channel	Transmembrane Transporters	Felodipine is a selective L-type Ca2+ channel blocker with IC50 of 0.15 nM.	384.25	72509-76-3	77	200.39	<1		http://selleckchem.com/products/Felodipine(Plendil).html	C18H19Cl2NO4	free base	CGH-869	CCOC(=O)C1=C(C)NC(=C(C1C2=CC=CC(=C2Cl)Cl)C(=O)OC)C	3.549	4	1	6
S1888	Deflazacort	2	m19	in 10mM DMSO	FDA,DMF,NDC	Martindale:The Extra Pharmacopoeia	208684,208685	Immunology/Inflammation	Glucocorticoid Receptor	Endocrinology & Hormones	Deflazacort is a glucocorticoid used as an anti-inflammatory and immunosuppressant.	441.52	14484-47-0	88	199.31	<1		http://selleckchem.com/products/Deflazacor.html	C25H31NO6	free base	MDL 458	CC(=O)OCC(=O)C12N=C(C)OC1CC3C4CCC5=CC(=O)C=CC5(C)C4C(O)CC23C	1.67	6	1	4
S1890	Nizatidine	2	o19	in 10mM DMSO	FDA,DMF,CFDA,NDC,PMDA,HMA	USP42-NF37;BP2019;KP Ⅹ;EP9.2;JP17;Martindale:The Extra Pharmacopoeia	075461,075616,075668,075806,075934,076178,076383,077314,090576,090618	Gastrointestinal Disease	Histamine Receptor	Neuronal Signaling	Nizatidine is a histamine H2 receptor antagonist with IC50 of 0.9 nM, also inhibits AChE with IC50 of 6.7 μM.	331.46	76963-41-2	66	199.12	28	84.47	http://selleckchem.com/products/Nizatidine(Axid).html	C12H21N5O2S2	free base	N/A	CNC(/NCCSCC1=CSC(=N1)CN(C)C)=C/[N+]([O-])=O	0.643	1	2	10
S1891	Carbidopa	2	a21	in 10mM DMSO	FDA,DMF,EMA,HMA,CFDA,NDC	USP42-NF37;BP2019;EP9.2;Ph.Int_6th;JP17;Martindale:The Extra Pharmacopoeia	203261,204291,204763,205304,209910	Neurological Disease	Decarboxylase	Metabolism	Carbidopa is an aromatic-L-amino-acid decarboxylase inhibitor with an IC50 of 29 ± 2 μM.	226.23	28860-95-9	4	17.68	<1		http://selleckchem.com/products/Carbidopa.html	C10H14N2O4	free base	N/A	CC(CC1=CC(=C(O)C=C1)O)(NN)C(O)=O	0.364	1	4	4
S1894	Valsartan	2	c21	in 10mM DMSO	FDA,DMF,EMA,HMA,CFDA,NDC,PMDA	USP42-NF37;BP2019;KP Ⅹ;JP17;IP2010;Martindale:The Extra Pharmacopoeia	077492,077530,090642,090866,091367,201677,202223,202696,202728,203311,203536,204011,204821,205347,205357,205536,209261	Cardiovascular Disease	RAAS	Endocrinology & Hormones	Valsartan is a selective angiotensin II receptor antagonist, used to treat high blood pressure and congestive heart failure.	435.52	137862-53-4	87	199.76	<1		http://selleckchem.com/products/Valsartan(Diovan).html	C24H29N5O3	free base	CGP-48933	CCCCC(=O)N(CC1=CC=C(C=C1)C2=CC=CC=C2C3=N[NH]N=N3)C(C(C)C)C(O)=O	4.538	5	1	10
S1895	Dipyridamole	2	e21	in 10mM DMSO	FDA,DMF,CFDA,NDC,PMDA,HMA	USP42-NF37;BP2019;KP Ⅹ;EP9.2;JP17;Martindale:The Extra Pharmacopoeia	040542,040733,040782,040874,040898,074521,074601,074939,074952,074956,075769,086944,087160,087184,087561,087562,087716,087717,088999,089000,089001,089425,089426,089427	Cardiovascular Disease	PDE	Metabolism	Dipyridamole (Persantine) is a phosphodiesterase inhibitor that blocks uptake and metabolism of adenosine by erythrocytes and vascular endothelial cells.	504.63	58-32-2	101	200.15	<1		http://selleckchem.com/products/Dipyridamole(Permole,-Persantine).html	C24H40N8O4	free base	NSC-515776	OCCN(CCO)C1=NC2=C(N=C(N=C2N3CCCCC3)N(CCO)CCO)C(=N1)N4CCCCC4	2.483	4	4	12
S1896	Hydroxyurea	2	g21	in 10mM DMSO	FDA,DMF,NDC,HMA	USP42-NF37;BP2015	074476,075020,075143,075340,075734	Cancer/Hematology	DNA/RNA Synthesis	DNA Damage	Hydroxyurea is an antineoplastic agent that inhibits DNA synthesis through the inhibition of ribonucleoside diphosphate reductase.	76.05	127-07-1	15	197.24	15	197.24	http://selleckchem.com/products/Hydroxyurea(Cytodrox).html	CH4N2O2	free base	nci-c04831, nsc32065	NC(=O)NO	-1.03	1	2	0
S1897	Potassium Iodide	2	i21	in 10mM DMSO	FDA,DMF,CFDA,NDC,PMDA,HMA	USP42-NF37;BP2019;KP Ⅹ;EP9.2;JP17;IP2010;Martindale:The Extra Pharmacopoeia	018551,206211	Endocrinology	Others	Others	Potassium Iodide is used to treat overactive thyroid and to protect the thyroid gland from the effects of radiation from inhaled or swallowed radioactive iodine.	166	7681-11-0	33	198.8	33	198.8	http://selleckchem.com/products/Potassium-iodide.html	IK	Inorganic salt	N/A	[K+].[I-]	-3.113	0	0	0
S1898	Tropisetron HCl	2	k21	in 10mM DMSO	CFDA,HMA	BP2019;EP9.2;Martindale:The Extra Pharmacopoeia	N/A	Gastroenterology	5-HT Receptor	Neuronal Signaling	Tropisetron HCl is a potent and selective 5-HT3 receptor antagonist and α7-nicotinic receptor agonist, used to treat nausea and vomiting following chemotherapy.	320.81	105826-92-4	35	109.1	46	143.39	http://selleckchem.com/products/Tropisetron-hydrochloride.html	C17H21ClN2O2	Hydrochloride	ICS 205-930	Cl.CN1C2CCC1CC(C2)OC(=O)C3C=NC4=CC=CC=C34	2.366	3	0	3
S1899	Nicotinamide (Vitamin B3)	2	m21	in 10mM DMSO	DMF,CFDA,NDC,PMDA,HMA	KP Ⅹ;EP9.1;Ph.Int_6th;JP17;Martindale:The Extra Pharmacopoeia	N/A	Inflammation/Cardiovascular Disease	Sirtuin	DNA Damage	Nicotinamide (Vitamin B3), a water-soluble vitamin, is an active component of coenzymes NAD and NADP, and also act as an inhibitor of sirtuins.	122.12	98-92-0	24	196.53	24	196.53	http://selleckchem.com/products/Nicotinamide(Niacinamide).html	C6H6N2O	free base	Niacinamide, Vitamin PP, Nicotinic acid amide	NC(=O)C1=CC=CN=C1	-0.319	2	1	1
S1902	Vitamin B12	2	o21	in 10mM DMSO	DMF,CFDA,NDC	USP39-NF34	N/A	Metabolic Disease/Inflammation/Neurological Disease	Vitamin	Metabolism	Vitamin B12 is a water soluble vitamin with a key role in the normal functioning of the brain and nervous system, and for the formation of blood.	1355.37	68-19-9	75	55.34	6	4.43	http://selleckchem.com/products/Vitamin-B12.html	C63H88CoN14O14P	free base	Cobalamin, Cyanocobalamin	CC(CNC(=O)CCC1(C)C(CC(N)=O)C2N=C1/C(=C/3N=C(/C=C/4N=C(/C(=C/5[N-]C2(C)C(C)(CC(N)=O)C5CCC(N)=O)C)C(C)(CC(N)=O)C4CCC(N)=O)C(C)(C)C3CCC(N)=O)C)O[P]([O-])(=O)OC6C(O)C(OC6CO)[N]7C=NC8=C7C=C(C)C(=C8)C.[Co++]C#N	-1.129	14	9	26
S1903	Diclofenac Sodium	2	b3	in 10mM DMSO	FDA,DMF,CFDA,NDC,PMDA,HMA	USP42-NF37;BP2019;KP Ⅹ;EP9.2;JP17;Martindale:The Extra Pharmacopoeia	020809,074376,074390,074391,074394,074432,074459,074514,074723,074986,075185,075281,075492,075910,076152,076201,077600,077845,077863,078031,078553,078792,090066,200936,202027,202393,202769,202852,203383,203786,203818,204132,204306,205878,206116,206298,206411,206493,206715,207238,208021,208068,208077,208098,208198,208301,208786,209484,209903,210893,211253	Inflammation	COX	Neuronal Signaling	Diclofenac Sodium is a non-selective COX inhibitor with IC50 of 0.5 μg/ml and 0.5 μg/ml for COX-1 and -2 in intact cells, respectively, used as a nonsteroidal anti-inflammatory drug (NSAID) to relieve pain and reduce swelling in flammation.	318.13	15307-79-6	64	201.18	14	44.01	http://selleckchem.com/products/Diclofenac-sodium.html	C14H10Cl2NNaO2	Sodium Salt	GP 45840	[Na+].[O-]C(=O)CC1=C(NC2=C(Cl)C=CC=C2Cl)C=CC=C1	2.899	0	1	4
S1904	Avobenzone	2	d3	in 10mM DMSO	FDA,DMF,NDC	USP42-NF37;Martindale:The Extra Pharmacopoeia	021471,022009,021502,021501,020045	Others	Others	Others	Avobenzone is an oil soluble ingredient used in sunscreen products to absorb the full spectrum of UVA rays and a dibenzoylmethane derivative.	310.39	70356-09-1	62	199.75	<1		http://selleckchem.com/products/Avobenzone(Parsol-1789).html	C20H22O3	free base	Butyl methoxydibenzoylmethane, BF2AVB	COC1=CC=C(C=C1)C(=O)CC(=O)C2=CC=C(C=C2)C(C)(C)C	4.538	3	0	6
S1905	Amlodipine	2	f3	in 10mM DMSO	FDA,DMF,EMA,HMA,CFDA,NDC,PMDA	USP42-NF37;BP2019;KP Ⅹ;EP9.2;JP17;IP2010;Martindale:The Extra Pharmacopoeia	022026,076418,076692,076719,076846,076859,077073,077080,077262,077333,077362,077516,077671,077759,077771,077955,077974,078021,078043,078081,078131,078224,078226,078231,078414,078453,078477,078500,078552,078573,078925,090752,201380,202553,203245,204900,206367,206524,207821	Cardiovascular Disease	Calcium Channel	Transmembrane Transporters	Amlodipine is a long-acting calcium channel blocker, used to lower blood pressure and prevent chest pain.	408.88	88150-42-9	82	200.55	<1		http://selleckchem.com/products/Amlodipine(Norvasc).html	C20H25ClN2O5	free base	UK-48340	CCOC(=O)C1=C(COCCN)NC(=C(C1C2=C(Cl)C=CC=C2)C(=O)OC)C	1.576	5	2	10
S1907	Metronidazole	2	h3	in 10mM DMSO	FDA,DMF,CFDA,NDC,PMDA,HMA	USP42-NF37;BP2019;EP9.2;KP Ⅹ;Ph.Int_6th;JP17;Martindale:The Extra Pharmacopoeia;IP2010	018517,018599,018620,018740,018764,018818,018845,018889,018907,018930,019029,070004,070008,070009,070021,070027,070033,070035,070039,070040,070042,070044,070071,070170,070593,070772,076408,076462,076505,076519,076522,077018,077197,077264,077547,077549,077819,078178,079065,079067,090222,090903,203458,203974,204651,205245,206560,207309,208162,208681,209096,209794	Infection	DNA/RNA Synthesis	DNA Damage	Metronidazole, a synthetic antibacterial and antiprotozoal agent of the nitroimidazole class, is used against protozoa.	171.15	443-48-1	34	198.66	<1		http://selleckchem.com/products/Metronidazole(Flagyl).html	C6H9N3O3	free base	N/A	CC1=NC=C([N]1CCO)[N+]([O-])=O	-0.337	1	1	3
S1908	Flutamide	2	j3	in 10mM DMSO	FDA,DMF,CFDA,NDC,PMDA,HMA	USP42-NF37;BP2019;EP9.2;JP17;IP2010;Martindale:The Extra Pharmacopoeia	075298,075780,075818,075820,076224	Cancer	Androgen Receptor	Endocrinology & Hormones	Flutamide is an antiandrogen drug, with its active metablolite binding at androgen receptor with Ki values of 55 nM, and primarily used to treat prostate cancer.	276.21	13311-84-7	55	199.12	<1		http://selleckchem.com/products/Flutamide(Eulexin).html	C11H11F3N2O3	free base	SCH-13521	CC(C)C(=O)NC1=CC(=C(C=C1)[N+]([O-])=O)C(F)(F)F	2.916	1	1	4
S1909	Fluvastatin Sodium	2	l3	in 10mM DMSO	FDA,DMF,CFDA,NDC,HMA	USP42-NF37;BP2019;EP9.2;Martindale:The Extra Pharmacopoeia	078407,078872,079011,090595,202458	Cardiovascular Disease	HMG-CoA Reductase	Metabolism	Fluvastatin Sodium inhibits HMG-CoA reductase activity with IC50 of 8 nM in a cell-free assay.	433.45	93957-55-2	87	200.72	1	2.31	http://selleckchem.com/products/Fluvastatin-Sodium(Lescol).html	C24H25FNNaO4	Sodium	XU-62-320	[Na+].CC(C)[N]1C2=C(C=CC=C2)C(=C1\C=C\C(O)CC(O)CC([O-])=O)C3=CC=C(F)C=C3	2.77	0	2	8
S1910	Tioconazole	2	n3	in 10mM DMSO	FDA,DMF,NDC,HMA	USP42-NF37;BP2019;EP9.2;Martindale:The Extra Pharmacopoeia	075915	Infection	Anti-infection	Microbiology	Tioconazole is an antifungal medication with an average IC50 of 1.7 μM.	387.71	65899-73-2	78	201.18	<1		http://selleckchem.com/products/tioconazole.html	C16H13Cl3N2OS	free base	UK-20349	ClC1=CC=C(C(C[N]2C=CN=C2)OCC3=C(Cl)SC=C3)C(=C1)Cl	4.437	2	0	6
S1913	Tropicamide	2	p3	in 10mM DMSO	FDA,DMF,CFDA,NDC,PMDA,HMA	USP42-NF37;BP2019;EP9.2;KP Ⅹ;Ph.Int_6th;JP17;IP2010;Martindale:The Extra Pharmacopoeia	040064,040067,087636,087637,088447,089171,089172	Ophthalmology	AChR	Neuronal Signaling	Tropicamide is an anticholinergic and a muscarinic receptor subtype M4-preferring antagonist with IC50 of 8.0 nM.	284.35	1508-75-4	57	200.46	<1		http://selleckchem.com/products/tropicamide.html	C17H20N2O2	free base	N/A	CCN(CC1=CC=NC=C1)C(=O)C(CO)C2=CC=CC=C2	1.432	2	1	6
S1914	Pregnenolone	2	b5	in 10mM DMSO	DMF,CFDA,NDC	USP42-NF37	N/A	Endocrinology	Estrogen/progestogen Receptor	Endocrinology & Hormones	Pregnenolone is an endogenous steroid hormone, used in the treatment of fatigue, Alzheimer’s disease, trauma and injuries.	316.48	145-13-1	22	69.51	<1		http://selleckchem.com/products/pregnenolone.html	C21H32O2	free base	N/A	CC(=O)C1CCC2C3CC=C4CC(O)CCC4(C)C3CCC12C	3.624	1	1	1
S1915	Sulfamethoxazole	2	d5	in 10mM DMSO	FDA,DMF,CFDA,NDC	USP42-NF37;BP2019;KP Ⅹ;Ph.Int_6th;JP17;Martindale:The Extra Pharmacopoeia;CP2005	085053,085844,086000,086163,087189,087662	Infection	Anti-infection	Microbiology	Sulfamethoxazole is a sulfonamide bacteriostatic antibiotic with an IC50 of 2.7 μM.	253.28	723-46-6	51	201.36	<1		http://selleckchem.com/products/Sulfamethoxazole.html	C10H11N3O3S	free base	N/A	CC1=CC(=NO1)N[S](=O)(=O)C2=CC=C(N)C=C2	0.709	4	2	3
S1916	Sulfisoxazole	2	f5	in 10mM DMSO	FDA,DMF,NDC	USP42-NF37;KP Ⅹ;JP17	080082,080085,080087,080109,080142,080189,080268,080379,084031,084385,085534,085628,087332,087649	Infection	Anti-infection	Microbiology	Sulfisoxazole is a sulfonamide antibacterial with an oxazole substituent.	267.3	127-69-5	53	198.28	<1		http://selleckchem.com/products/Sulfisoxazole.html	C11H13N3O3S	free base	NU-445	CC1=NOC(=C1C)N[S](=O)(=O)C2=CC=C(N)C=C2	0.918	4	2	3
S1917	Crystal Violet	2	h5	in 10mM DMSO	N/A	USP42-NF37;BP2019;EP9.2;IP2010	N/A	Infection	Others	Others	Crystal violet is a triarylmethane dye.	407.98	548-62-9	82	200.99	14	34.32	http://selleckchem.com/products/Crystal-violet.html	C25H30ClN3	quaternary-N chloride salt	N/A	[Cl-].CN(C)C1=CC=C(C=C1)C(C2=CC=C(C=C2)N(C)C)=C3C=CC(C=C3)=[N+](C)C	2.25	0	0	4
S1920	Haloperidol	2	j5	in 10mM DMSO	FDA,DMF,CFDA,NDC,PMDA,HMA	USP42-NF37;BP2019;EP9.2;KP Ⅹ;Ph.Int_6th;JP17;IP2010;Martindale:The Extra Pharmacopoeia	020074,070278,070318,070710,070713,070714,070720,070721,070722,070723,070724,070725,070726,070744,070800,070801,070802,070864,070981,070982,070983,070984,071015,071071,071072,071073,071074,071075,071076,071082,071128,071129,071130,071131,071132,071133,071156,071157,071172,071173,071177,071187,071206,071207,071208,071209,071210,071211,071212,071216,071217,071218,071219,071220,071221,071233,071234,…	Psychotic disorders	Dopamine Receptor	Neuronal Signaling	Haloperidol (Haldol) is an antipsychotic and butyrophenone.	375.86	52-86-8	75	199.54	<1		http://selleckchem.com/products/Haloperidol(Haldol).html	C21H23ClFNO2	free base	N/A	OC1(CCN(CCCC(=O)C2=CC=C(F)C=C2)CC1)C3=CC=C(Cl)C=C3	3.887	1	0	6
S1921	Phenindione	2	l5	in 10mM DMSO	FDA	BP2019;IP2010;Martindale:The Extra Pharmacopoeia	008767	Cardiovascular Disease/Respiratory Disease	Vitamin	Metabolism	Phenindione is an anticoagulant which functions as a Vitamin K antagonist.	222.24	83-12-5	44	197.98	<1		http://selleckchem.com/products/Phenindione(Rectadione).html	C15H10O2	free base	Rectadione, phenylindandione	O=C1C(C2=CC=CC=C2)C(=O)C3=CC=CC=C13	2.819	2	0	1
S1928	Alibendol	2	n5	in 10mM DMSO	N/A	Martindale the Extra Pharmacopoei	N/A	Neurological Disease	Others	Others	Alibendol is an antispasmodic,choleretic, and cholekinetic.	251.28	26750-81-2	50	198.98	<1		http://selleckchem.com/products/alibendol.html	C13H17NO4	free base	EB 1856	COC1=CC(=CC(=C1O)C(=O)NCCO)CC=C	1.248	2	3	6
S1933	Triamcinolone	2	p5	in 10mM DMSO	FDA,DMF,CFDA,NDC,PMDA,HMA	USP40-NF35;BP2015;JP16;Martindale:The Extra Pharmacopoeia	083750,084020,084267,084268,084270,084286,084318,084319,084320,084340,084406,084707,084708,084709,084775,085601,085834	Immunology/Inflammation	Glucocorticoid Receptor	Endocrinology & Hormones	Triamcinolone is a glucocorticoid given, as the free alcohol or in esterified form, orally, intramuscularly, by local injection, by inhalation, or applied topically in the management of various disorders in which corticosteroids are indicated.	394.43	124-94-7	78	197.75	<1		http://selleckchem.com/products/Triamcinolone(Aristocort).html	C21H27FO6	free base	N/A	CC12CC(O)C3(F)C(CCC4=CC(=O)C=CC34C)C1CC(O)C2(O)C(=O)CO	0.422	2	3	2
S1934	Nystatin (Fungicidin)	2	b7	in 10mM DMSO	FDA,DMF,CFDA,NDC,PMDA,HMA	EP9.2;Ph.Int_6th;JP17;BP2017;IP2010;Martindale:The Extra Pharmacopoeia	061965,061966,062065,062124,062129,062176,062225,062349,062402,062457,062459,062460,062472,062474,062502,062506,062509,062512,062517,062518,062524,062525,062541,062571,062613,062615,062670,062776,062832,062835,062838,062840,062876,062949,064022,064042,064142,065138,065148,065175,065183,065203,065315,065321,065422,203621,207733,207767,208581,208838,209082,209114,210532,211838	Infection	Anti-infection	Microbiology	Nystatin, which belongs to the polyene group of antimycotics, is frequently used as a topical agent in the treatment of oro-pharyngeal candidosis.	1056.24	62997-67-5	19	17.99	<1		http://selleckchem.com/products/Nystatin(Mycostatin).html	C47H75NO17	free base	N/A	CC1OC(=O)CC(O)CC(O)CC(O)CCC(O)C(O)CC2(O)CC(O)C(C(CC(OC3OC(C)C(O)C(N)C3O)/C=C/C=C/C=C/C=C/CC/C=C/C=C/C(C)C(O)C1C)O2)C(O)=O	-2.265	8	11	5
S1937	Isoniazid	2	d7	in 10mM DMSO	FDA,DMF,CFDA,NDC,PMDA,HMA	USP42-NF37;BP2019;KP Ⅹ;EP9.2;Ph.Int_6th;JP17;IP2010;Martindale:The Extra Pharmacopoeia	008428,008499,008678,040090,040648,080120,080132,080136,080153,080212,080270,080368,080401,080521,080522,080523,080936,080937,080941,081118,083060,083178,083610,083632,083633,084050,085091,085784,085790,087425,088119,088231,088235,089816,202610	Infection	Fatty Acid Synthase	Metabolism	Isoniazid is a prodrug that blocks the action of fatty acid synthase by interacting with KatG , used for the prevention and treatment of tuberculosis.	137.14	54-85-3	27	196.88	27	196.88	http://selleckchem.com/products/Isoniazid(Tubizid).html	C6H7N3O	free base	N/A	NNC(=O)C1=CC=NC=C1	-0.811	2	2	1
S1940	Levofloxacin	2	f7	in 10mM DMSO	FDA,DMF,EMA,HMA,CFDA,NDC,PMDA	USP42-NF37;EP9.8;JP17;IP2010;Martindale:The Extra Pharmacopoeia	021832,076276,076361,076710,076826,076890,077097,077438,077652,077700,078282,078424,078577,078767,090063,090268,090367,090722,090787,091436,091644,091678,200250,200560,200839,201043,201484,202200,202328,202590,202801,203613,204899,204968,205222,205600,205968	Infection/Inflammation	Topoisomerase	DNA Damage	Levofloxacin is a broad-spectrum antibiotic topoisomerase II and topoisomerase IV inhibitor, used to treat respiratory, urinary tract, gastrointestinal, and abdominal infections.	361.37	100986-85-4	24	66.41	11	30.44	http://selleckchem.com/products/levofloxacin-levaquin.html	C18H20FN3O4	Free Base	Fluoroquinolone	CC1COC2=C(N3CCN(C)CC3)C(=CC4=C2N1C=C(C(O)=O)C4=O)F	-1.374	3	0	2
S1941	Enalapril Maleate	2	h7	in 10mM DMSO	FDA,DMF,CFDA,NDC,PMDA,HMA	USP42-NF37;BP2019;KP Ⅹ;JP17;Martindale:The Extra Pharmacopoeia;CP2005	075048,075178,075369,075370,075459,075472,075479,075480,075482,075483,075496,075501,075556,075583,075621,075657	Cardiovascular Disease/Endocrinology/Metabolic Disease	RAAS	Endocrinology & Hormones	Enalapril Maleate is an angiotensin-converting enzyme (ACE) inhibitor, used in the treatment of hypertension, diabetic nephropathy, and chronic heart failure.	492.52	76095-16-4	99	201.01	<1		http://selleckchem.com/products/Enalapril-maleate(Vasotec).html	C24H32N2O9	Maleate	MK-421 Maleate	CCOC(=O)C(CCC1=CC=CC=C1)NC(C)C(=O)N2CCCC2C(O)=O.OC(=O)\C=C/C(O)=O	-0.502	6	1	12
S1949	Menadione	2	j7	in 10mM DMSO	FDA,CFDA,NDC	USP42-NF37;BP2019;EP9.2;Martindale:The Extra Pharmacopoeia	002139	Hematology	DNA/RNA Synthesis,phosphatase	Others	Menadione(Vitamin K3), a fat-soluble compound, is an inhibitor of Cdc25 phosphatase and mitochondrial DNA polymerase γ (pol γ), used as a nutritional supplement.	172.18	58-27-5	34	197.47	<1		http://selleckchem.com/products/Menadione.html	C11H8O2	free base	Vitamin K3	CC1=CC(=O)C2=CC=CC=C2C1=O	2.204	2	0	0
S1950	Metformin HCl	2	l7	in 10mM DMSO	FDA,DMF,EMA,HMA,CFDA,NDC,PMDA	USP42-NF37;BP2019;KP Ⅹ;EP9.2;JP17;IP2010;Martindale:The Extra Pharmacopoeia;CP2005	075961,075965,075967,075969,075971,075972,075973,075975,075976,075978,075979,075984,075985,076033,076038,076172,076223,076249,076269,076328,076413,076450,076496,076545,076650,076706,076756,076818,076863,076864,076869,076873,076878,076985,077060,077064,077078,077095,077113,077124,077211,077336,077711,077787,077853,077880,078170,078321,078422,078596,079118,079148,079226,090014,090295,090564,090666,…	Cancer/Cardiovascular Disease/Endocrinology/Metabolic Disease	Autophagy	Autophagy	Metformin HCl decreases hyperglycemia in hepatocytes primarily by suppressing glucose production by the liver (hepatic gluconeogenesis).	165.62	1115-70-4	33	199.25	33	199.25	http://selleckchem.com/products/Metformin-hydrochloride(Glucophage).html	C4H12ClN5	Hydrochloride	N/A	Cl.CN(C)C(=N)NC(N)=N	-0.36	0	2	3
S1952	Methoxsalen	2	n7	in 10mM DMSO	FDA,DMF,CFDA,NDC,PMDA,HMA	USP42-NF37;KP Ⅹ;JP17;Martindale:The Extra Pharmacopoeia	087781,202603,202687	Inflammation	P450 (e.g. CYP17)	Metabolism	Methoxsalen is a naturally occurring photoactive substance found in the seeds of the Ammi majus (Umbelliferae) plant, used in the diagnosis and treatment of psoriasis A CYP2A5/6 inhibitor.	216.19	298-81-7	43	198.9	<1		http://selleckchem.com/products/Methoxsalen(Oxsoralen).html	C12H8O4	free base	Xanthotoxin, NCI-C55903	COC1=C2OC=CC2=CC3=C1OC(=O)C=C3	2.187	4	0	1
S1956	Miconazole Nitrate	2	p7	in 10mM DMSO	FDA,DMF,CFDA,NDC,PMDA,HMA	USP42-NF37;EP9.7;BP2019;KP Ⅹ;Ph.Int_6th ;JP17;IP2010;Martindale:The Extra Pharmacopoeia	073507,073508,074030,074136,074366,074395,074414,074444,074760,079114,091366	Infection	Anti-infection	Microbiology	Miconazole Nitrate is an imidazole antifungal agent by inhibiting ergosterol biosynthesis and inducing ROS, used to treat vaginal yeast infections.	479.14	22832-87-7	96	200.36	<1		http://selleckchem.com/products/Miconazole-nitrate.html	C18H15Cl4N3O4	Nitrate	NSC 169434 Nitrate	O[N+]([O-])=O.ClC1=CC=C(COC(C[N]2C=CN=C2)C3=CC=C(Cl)C=C3Cl)C(=C1)Cl	4.387	2	0	6
S1957	Sulfamethizole	2	b9	in 10mM DMSO	FDA,DMF	USP42-NF37;BP2019;KP Ⅹ;EP9.2;JP17;Martindale:The Extra Pharmacopoeia	086012,080273,008565	Infection	Anti-infection	Microbiology	Sulfamethizole is a sulfathiazole antibacterial agent.	270.33	144-82-1	54	199.76	<1		http://selleckchem.com/products/Sulfamethizole(Proklar).html	C9H10N4O2S2	free base	N/A	CC1=NN=C(N[S](=O)(=O)C2=CC=C(N)C=C2)S1	0.305	4	2	3
S1958	Sulbactam	2	d9	in 10mM DMSO	FDA,DMF,CFDA,NDC,HMA	USP42-NF37;BP2019;KP Ⅹ;EP9.2;JP17;Martindale:The Extra Pharmacopoeia	065074,065076,065176,065188,065222,065240,065241,065310,065314,065316,065403,065406,090339,090340,090349,090375,090578,090579,090646,090653,201024,201406,202197	Infection	Anti-infection	Microbiology	Sulbactam is a beta-lactamase inhibitor with an average IC50 of 0.8 μM.	233.24	68373-14-8	47	201.51	47	201.51	http://selleckchem.com/products/sulbactam.html	C8H11NO5S	free base	N/A	CC1(C)C(N2C(CC2=O)[S]1(=O)=O)C(O)=O	-0.671	4	0	1
S1959	Tolfenamic Acid	2	f9	in 10mM DMSO	DMF,CFDA,HMA	EP9.8;BP2019;KP Ⅹ;Martindale:The Extra Pharmacopoeia	N/A	Inflammation	COX	Neuronal Signaling	Tolfenamic Acid is a COX-2 inhibitor with IC50 of 0.2 μM.	261.7	13710-19-5	52	198.7	<1		http://selleckchem.com/products/tolfenamic-acid.html	C14H12ClNO2	free base	N/A	CC1=C(Cl)C=CC=C1NC2=C(C=CC=C2)C(O)=O	4.16	1	1	3
S1960	Pranoprofen	2	h9	in 10mM DMSO	CFDA,PMDA	KP Ⅹ;JP17;Martindale:The Extra Pharmacopoeia	N/A	Inflammation/Ophthalmology	COX	Neuronal Signaling	Pranoprofen is a non-steroidal COX inhibitor, used as an anti-inflammatory drug in ophthalmology.	255.27	52549-17-4	51	199.79	<1		http://selleckchem.com/products/pranoprofen.html	C15H13NO3	free base	Pyranoprofen	CC(C(O)=O)C1=CC2=C(OC3=NC=CC=C3C2)C=C1	3.05	3	0	2
S1962	Sulphadimethoxine	2	j9	in 10mM DMSO	DMF	EP10.4, USP43-NF38	N/A	Infection	Anti-infection	Microbiology	Sulphadimethoxine is a non-reducing glucuronide.	310.33	122-11-2	62	199.79	<1		http://selleckchem.com/products/sulphadimethoxine.html	C12H14N4O4S	free base	N/A	COC1=CC(=NC(=N1)OC)N[S](=O)(=O)C2=CC=C(N)C=C2	1.358	6	2	5
S1964	Rimantadine	2	l9	in 10mM DMSO	FDA,DMF,CFDA,NDC	USP42-NF37;Martindale:The Extra Pharmacopoeia	075916,076132,076375	Infection	Anti-infection	Microbiology	Rimantadine (Flumadine) is an anti-influenza virus drug for T. brucei with IC50 of 7 μM.	179.3	13392-28-4	33	184.05	33	184.05	http://selleckchem.com/products/rimantadine-flumadine.html	C12H21N	free base	N/A	CC(N)[C]12C[CH]3[CH2]C([CH2][CH](C3)C1)C2	2.204	0	1	1
S1965	Primidone	2	n9	in 10mM DMSO	FDA,DMF,CFDA,NDC,PMDA,HMA	USP42-NF37;EP9.3;BP2019;KP Ⅹ;JP17;Martindale:The Extra Pharmacopoeia	040586,040626,040667,040717,040862,040866,083551,084903,085052	Neurological Disease	Sodium Channel	Transmembrane Transporters	Primidone is an anticonvulsant of the pyrimidinedione class.	218.25	125-33-7	44	201.6	<1		http://selleckchem.com/products/Primidone(Mysoline).html	C12H14N2O2	free base	NCI-C56360	CCC1(C(=O)NCNC1=O)C2=CC=CC=C2	0.931	2	2	2
S1969	Nefiracetam	2	p9	in 10mM DMSO	DMF	Martindale:The Extra Pharmacopoeia	N/A	Neurological Disease	GABA Receptor	Neuronal Signaling	Nefiracetam is a GABAergic, cholinergic, and monoaminergic neuronal system enhancer for Ro 5-4864-induced convulsions. Phase 2.	246.3	77191-36-7	49	198.94	5	20.3	http://selleckchem.com/products/Nefiracetam(Translon).html	C14H18N2O2	free base	DZL 221	CC1=CC=CC(=C1NC(=O)CN2CCCC2=O)C	1.443	2	1	3
S1971	Nicorandil	2	b11	in 10mM DMSO	DMF,CFDA,PMDA,HMA	BP2019;KP Ⅹ;JP17;Martindale:The Extra Pharmacopoeia	N/A	Angiology/Cardiovascular Disease	Potassium Channel	Transmembrane Transporters	Nicorandil is a potassium channel activator, and stimulates guanylate cyclase to increase formation of cyclic GMP (cGMP).	211.17	65141-46-0	42	198.89	17	80.5	http://selleckchem.com/products/Nicorandil(Ikorel).html	C8H9N3O4	free base	SG-75	[O-][N+](=O)OCCNC(=O)C1=CC=CN=C1	1.758	3	1	5
S1972	Tamoxifen Citrate	2	d11	in 10mM DMSO	FDA,DMF,CFDA,NDC,PMDA,HMA	USP42-NF37;BP2019;EP9.2;KP Ⅹ;Ph.Int_6th;JP17;IP2010;Martindale:The Extra Pharmacopoeia	070929,074504,074539,074732,075740,075797,076027,076179,076398,090878,206694	Cancer	Estrogen/progestogen Receptor,Autophagy	Endocrinology & Hormones	Tamoxifen Citrate is an antagonist of the estrogen receptor by competitive inhibition of estrogen binding.	563.64	54965-24-1	100	177.42	<1		http://selleckchem.com/products/Tamoxifen-Citrate(Nolvadex).html	C32H37NO8	Citrate	ICI 46474 Citrate	CC/C(C1=CC=CC=C1)=C(C2=CC=CC=C2)/C3=CC=C(OCCN(C)C)C=C3.OC(=O)CC(O)(CC(O)=O)C(O)=O	1.966	4	0	13
S1973	Cyclocytidine HCl	2	f11	in 10mM DMSO	CFDA	N/A	N/A	Cancer	DNA/RNA Synthesis	DNA Damage	Cyclocytidine is the prodrug of cytarabine, which is a pyrimidine nucleoside analog that inhibits the DNA synthesis and used mainly in the treatment of leukemia.	261.66	10212-25-6	10	38.22	44	168.16	http://selleckchem.com/products/cyclocytidine-hcl.html	C9H12ClN3O4	Hydrochloride	NSC 145668 HCl	Cl.OCC1OC2C(OC3=NC(=N)C=CN23)C1O	-1.395	3	2	1
S1974	Meglumine	2	h11	in 10mM DMSO	N/A	USP42-NF37;EP9.8;KP Ⅹ;JP17;Ph.Int_6th;Martindale:The Extra Pharmacopoeia	N/A	Diagnosis	Others	Others	Meglumine is an amino sugar derived from sorbitol for THP-1 cells with IC50 of 22 μg/mL.	195.21	6284-40-8	39	199.78	39	199.78	http://selleckchem.com/products/meglumine.html	C7H17NO5	free base	N/A	CNCC(O)C(O)C(O)C(O)CO	-2.798	0	6	6
S1975	Aripiprazole	2	j11	in 10mM DMSO	FDA,DMF,EMA,HMA,CFDA,NDC,PMDA	USP42-NF37;BP2019;EP9.2;Martindale:The Extra Pharmacopoeia	078583,078607,078608,078612,078613,078614,078708,090165,090472,091279,201519,202101,202102,202547,202683,203906,203908,204094,204111,204171,204838,205064,205363,206174,206240,206251,206383,207105,207240,208260,208438,210479	Psychotic disorders	5-HT Receptor	Neuronal Signaling	Aripiprazole is a novel atypical antipsychotic drug that is reported to be a high-affinity 5-HT receptor partial agonist.	448.39	129722-12-9	90	200.72	<1		http://selleckchem.com/products/aripiprazole-abilify.html	C23H27Cl2N3O2	free base	OPC-14597	ClC1=CC=CC(=C1Cl)N2CCN(CCCCOC3=CC=C4CCC(=O)NC4=C3)CC2	4.998	2	1	7
S1978	Methscopolamine	2	l11	in 10mM DMSO	FDA,DMF,CFDA,NDC	USP42-NF37	040624,040642,080970,200602	Gastrointestinal Disease	AChR	Neuronal Signaling	Methscopolamine is a muscarinic acetylcholine receptor blocker.	398.29	155-41-9	79	198.35	67	168.22	http://selleckchem.com/products/Methscopolamine-bromide(Pamine).html	C18H24BrNO4	quaternary-N bromide salt	N/A	[Br-].C[N+]1(C)C2CC(CC1C3OC23)OC(=O)C(CO)C4=CC=CC=C4	-2.949	3	1	5
S1979	Amiodarone HCl	2	n11	in 10mM DMSO	FDA,DMF,CFDA,NDC,PMDA,HMA	USP42-NF37;BP2019;EP9.2;JP17;IP2010;Martindale:The Extra Pharmacopoeia	021594,074739,074895,075188,075315,075389,075424,075761,075955,076018,076088,076108,076163,076217,076232,076299,076362,076394,077069,077161,077234,077610,077834,078578,079029,203884,203885,204550,204742	Cardiovascular Disease	Autophagy,Potassium Channel	Transmembrane Transporters	Amiodarone HCl is a sodium/potassium-ATPase inhibitor and an autophagy activator, used to treat various types of cardiac dysrhythmias.	681.77	19774-82-4	23	33.74	<1		http://selleckchem.com/products/amiodarone-hcl.html	C25H30ClI2NO3	Hydrochloride	N/A	Cl.CCCCC1=C(C(=O)C2=CC(=C(OCCN(CC)CC)C(=C2)I)I)C3=C(O1)C=CC=C3	7.62	3	0	11
S1983	Adenine HCl	2	p11	in 10mM DMSO	DMF,NDC,PMDA	USP42-NF37;BP2019;EP9.2;JP16;Martindale:The Extra Pharmacopoeia	N/A	Others	DNA/RNA Synthesis	DNA Damage	Adenine HCl is a hydrochloride salt form of adenine which is a purine derivative and a nucleobase with a variety of roles in biochemistry.	171.59	2922-28-3	8	46.62	4	23.31	http://selleckchem.com/products/adenine-hydrochloride.html	C5H6ClN5	Hydrochloride	N/A	Cl.NC1=NC=NC2=C1N=C[NH]2	-0.06	3	2	0
S1987	Mometasone furoate	2	b13	in 10mM DMSO	FDA,DMF,CFDA,NDC,PMDA,HMA	USP42-NF37;BP2019;KP Ⅹ;EP9.5;IP2010;Martindale:The Extra Pharmacopoeia	075919,076067,076171,076481,076499,076591,076624,076679,076788,077061,077180,077401,077447,077678,078541,078571,090506,091161,207899,207989	Immunology	Glucocorticoid Receptor	Endocrinology & Hormones	Mometasone Furoate is a glucocorticoid receptor agonist, used topically to reduce inflammation of the skin or in the airways.	521.43	83919-23-7	6	11.51	<1		http://selleckchem.com/products/mometasone-furoate.html	C27H30Cl2O6	Furoate	SCH-32088	CC1CC2C3CCC4=CC(=O)C=CC4(C)C3(Cl)C(O)CC2(C)C1(OC(=O)C5=CC=CO5)C(=O)CCl	4.616	5	1	5
S1988	Propylthiouracil	2	d13	in 10mM DMSO	FDA,DMF,CFDA,NDC,PMDA,HMA	USP42-NF37;BP2019;KP Ⅹ;Ph.Int_6th;JP17;IP2010;Martindale:The Extra Pharmacopoeia	006188,006213,080015,080016,080154,080159,080172,080215,080285,080840,080932,083982,084075,084543,085201	Endocrinology	Others	Others	Propylthiouracil is a thyroperoxidase and 5'-deiodinase inhibitor, used to treat hyperthyroidism.	170.23	51-52-5	34	199.73	<1		http://selleckchem.com/products/Propylthiouracil.html	C7H10N2OS	free base	NSC 6498, NSC 70461	CCCC1=CC(=O)NC(=S)N1	1.575	1	2	2
S1990	Capsaicin(Vanilloid)	2	f13	in 10mM DMSO	FDA,DMF,EMA,HMA,CFDA,NDC	USP42-NF37;BP2019;EP9.2;Martindale:The Extra Pharmacopoeia	022395	Neurological Disease	Others	Others	Capsaicin is an active component of chili peppers, which are plants belonging to the genus Capsicum.	305.41	404-86-4	61	199.73	<1		http://selleckchem.com/products/capsaicin.html	C18H27NO3		Qutenza, Vanilloid	COC1=C(O)C=CC(=C1)CNC(=O)CCCC\C=C\C(C)C	3.91	2	2	9
S1992	Fluticasone propionate	2	h13	in 10mM DMSO	FDA,DMF,EMA,HMA,CFDA,NDC,PMDA	USP42-NF37;BP2019;KP Ⅹ;EP9.2;IP2010;Martindale:The Extra Pharmacopoeia	076300,076451,076504,076633,076668,076793,076865,077055,077145,077168,077538,077570,078492,090759,091553,207957,208024,208150	Immunology	Glucocorticoid Receptor	Endocrinology & Hormones	Fluticasone Propionate is a synthetic glucocorticoid, used to treat non-allergic and allergic rhinitis.	500.57	80474-14-2	100	199.77	<1		http://selleckchem.com/products/fluticasone-propionate-Flonase-Veramyst.html	C25H31F3O5S	free base	CCI-187881	CCC(=O)OC1(C(C)CC2C3CC(F)C4=CC(=O)C=CC4(C)C3(F)C(O)CC12C)C(=O)SCF	4.086	4	1	6
S1994	Lacidipine	2	j13	in 10mM DMSO	DMF,CFDA,HMA	BP2019;KP Ⅹ;Martindale:The Extra Pharmacopoeia	N/A	Cardiovascular Disease	Calcium Channel	Transmembrane Transporters	Lacidipine is a L-type calcium channel blocker, used for treating high blood pressure.	455.54	103890-78-4	91	199.76	<1		http://selleckchem.com/products/lacidipine-lacipil-motens.html	C26H33NO6	free base	GX-1048,GR-43659X,SN-305	CCOC(=O)C1=C(C)NC(=C(C1C2=C(C=CC=C2)\C=C\C(=O)OC(C)(C)C)C(=O)OCC)C	3.824	6	1	11
S2001	Elvitegravir (GS-9137, JTK-303)	2	l13	in 10mM DMSO	FDA,DMF,EMA,NDC,PMDA	Martindale:The Extra Pharmacopoeia	203093,207561,203100	Infection	Integrase	Microbiology	Elvitegravir (GS-9137, JTK-303) is an HIV integrase inhibitor for HIV-1 IIIB, HIV-2 EHO and HIV-2 ROD with IC50 of 0.7 nM, 2.8 nM and 1.4 nM in cell-free assays, respectively.	447.88	697761-98-1	89	198.71	<1		http://selleckchem.com/products/Elvitegravir.html	C23H23ClFNO5	free base	N/A	COC1=CC2=C(C=C1CC3=C(F)C(=CC=C3)Cl)C(=O)C(=CN2C(CO)C(C)C)C(O)=O	4.665	3	1	7
S2003	Maraviroc	2	n13	in 10mM DMSO	FDA,DMF,EMA,NDC,PMDA	Martindale:The Extra Pharmacopoeia	203347,203382	Infection	CCR	Microbiology	Maraviroc is a CCR5 antagonist for MIP-1α, MIP-1β and RANTES with IC50 of 3.3 nM, 7.2 nM and 5.2 nM in cell-free assays, respectively.	513.67	376348-65-1	100	194.68	<1		http://selleckchem.com/products/Maraviroc.html	C29H41F2N5O	free base	UK-427857	CC(C)C1=NN=C(C)[N]1C2CC3CCC(C2)N3CCC(NC(=O)C4CCC(F)(F)CC4)C5=CC=CC=C5	3.921	3	1	8
S2005	Raltegravir (MK-0518)	2	p13	in 10mM DMSO	FDA,DMF,EMA,NDC,PMDA	USP42-NF37;EP9.4;BP2019;Martindale:The Extra Pharmacopoeia	203540	Infection	Integrase	Microbiology	Raltegravir (MK-0518) is a potent integrase (IN) inhibitor for WT and S217Q PFV IN with IC50 of 90 nM and 40 nM in cell-free assays, respectively. It shows greater than 1000-fold selectivity for HIV-1 IN over several related Mg2+-dependent enzyme such as HCV polymerase, HIV reverse transcriptase, HIV RNaseH and human α-, β-, γ-polymerases.	444.42	518048-05-0	88	198.01	<1		http://selleckchem.com/products/Raltegravir-(MK-0518).html	C20H21FN6O5	free base	N/A	CN1C(=O)C(=C(N=C1C(C)(C)NC(=O)C2=NN=C(C)O2)C(=O)NCC3=CC=C(F)C=C3)O	-0.291	7	3	6
S2006	Pyrimethamine	2	b15	in 10mM DMSO	FDA,DMF,CFDA,NDC	USP42-NF37;EP9.7;BP2019;Ph.Int_6th;IP2010;Martindale:The Extra Pharmacopoeia	008578,018557	Infection/Parasitology/Respiratory Disease	DHFR	Metabolism	Pyrimethamine is a dihydrofolate reductase (DHFR) inhibitor, used as an antimalarial drug.	248.71	58-14-0	10	40.21	<1		http://selleckchem.com/products/Pyrimethamine.html	C12H13ClN4	free base	N/A	CCC1=NC(=NC(=C1C2=CC=C(Cl)C=C2)N)N	2.75	2	2	2
S2007	Sulindac	2	d15	in 10mM DMSO	FDA,DMF,CFDA,NDC,PMDA	USP42-NF37;BP2019;EP9.2;JP17;Martindale:The Extra Pharmacopoeia	071795,071891,072050,072051,072710,072711,072712,072713,072972,072973,073038,073039,073261,073262	Inflammation	COX	Neuronal Signaling	Sulindac is a non-steroidal COX inhibitor, which potently inhibits prostaglandin synthesis, used in the treatment of acute or chronic inflammatory conditions.	356.41	38194-50-2	71	199.21	<1		http://selleckchem.com/products/Sulindac(Clinoril).html	C20H17FO3S	free base	N/A	CC1=C(CC(O)=O)C2=C(C=CC(=C2)F)\C1=C/C3=CC=C(C=C3)[S](C)=O	3.639	2	0	4
S2011	Pramipexole 2HCl Monohydrate	2	f15	in 10mM DMSO	FDA,DMF,EMA,HMA,CFDA,NDC,PMDA	USP42-NF37;BP2019;EP9.2;Martindale:The Extra Pharmacopoeia	077724,077854,078551,078894,078920,090151,090190,090241,090764,090781,090865,091254,091450,091683,201963,202164,202206,202353,202633,202702,202891,203354,203615,203855,204518,206156,207011,211088	Neurological Disease	Dopamine Receptor	Neuronal Signaling	Pramipexole 2HCl Monohydrateis a novel non-ergoline dopamine (DA) agonist, used to treat Parkinson's disease.	302.26	191217-81-9	41	135.64	60	198.5	http://selleckchem.com/products/Pramipexole-dihydrochloride-monohydrate.html	C10H21Cl2N3OS	Dihydrochloride monohydrate	N/A	O.Cl.Cl.CCCNC1CCC2=C(C1)SC(=N2)N	1.94	1	2	3
S2015	Suplatast Tosylate	2	h15	in 10mM DMSO	CFDA,PMDA	Martindale:The Extra Pharmacopoeia	N/A	Immunology	IL Receptor	Others	Suplatast Tosilate is a novel capsular anti-asthmatic agent that suppresses both IgE production, IL-4 and IL-5 synthesis with IC50 above 100 μM.	499.64	94055-76-2	100	200.14	100	200.14	http://selleckchem.com/products/suplatast-tosilate.html	C23H33NO7S2	Tosylate	IPD-1151T	CCOCC(O)COC1=CC=C(NC(=O)CC[S+](C)C)C=C1.CC2=CC=C(C=C2)[S]([O-])(=O)=O	0.877	3	2	11
S2016	Mirtazapine	2	j15	in 10mM DMSO	FDA,DMF,CFDA,NDC,PMDA,HMA	USP42-NF37;BP2019;EP9.2;Martindale:The Extra Pharmacopoeia	076119,076122,076176,076189,076219,076241,076244,076270,076307,076308,076312,076336,076541,076689,076901,076921,077376,077666,077959,205798	Psychotic disorders	5-HT Receptor	Neuronal Signaling	Mirtazapine is an adrenergic and seroton receptor antagonist, used to treat depression.	265.35	85650-52-8	53	199.74	<1		http://selleckchem.com/products/mirtazapine-remeron-avanza.html	C17H19N3	free base	Org3770	CN1CCN2C(C1)C3=C(CC4=C2N=CC=C4)C=CC=C3	3.094	1	0	0
S2017	Benidipine HCl	2	l15	in 10mM DMSO	CFDA,PMDA	JP17;Martindale:The Extra Pharmacopoeia	N/A	Cardiovascular Disease	Calcium Channel	Transmembrane Transporters	Benidipine HCl is a hydrochloride salt form of benidipine which is a dihydropyridine calcium channel blocker.	542.02	91599-74-5	8	14.76	<1		http://selleckchem.com/products/benidipine-hydrochloride.html	C28H32ClN3O6	Hydrochloride	KW-3049	Cl.COC(=O)C1=C(C)NC(=C(C1C2=CC(=CC=C2)[N+]([O-])=O)C(=O)OC3CCCN(C3)CC4=CC=CC=C4)C	4.36	4	1	9
S2020	Formoterol Hemifumarate	2	n15	in 10mM DMSO	FDA,DMF,EMA,HMA,CFDA,NDC,PMDA	USP42-NF37;BP2019;EP9.2;KP Ⅹ;JP17;IP2010;Martindale:The Extra Pharmacopoeia	091141	Inflammation	Adrenergic Receptor	Neuronal Signaling	Formoterol Hemifumarate is a potent, selective and long-acting β2-adrenoceptor agonist used in the management of asthma and chronic obstructive pulmonary disease(COPD).	402.4	43229-80-7	80	198.81	<1		http://selleckchem.com/products/formoterol-hemifumarate.html	C42H52N4O12	Hemifumarate	Eformoterol, CGP 25827A, NSC 299587, YM 08316	COC1=CC=C(CC(C)NCC(O)C2=CC=C(O)C(=C2)NC=O)C=C1.COC3=CC=C(CC(C)NCC(O)C4=CC=C(O)C(=C4)NC=O)C=C3.OC(=O)\C=C\C(O)=O	-1.526	6	8	18
S2021	Chlormezanone	2	p15	in 10mM DMSO	FDA,DMF,CFDA	Martindale:The Extra Pharmacopoeia	011467	Neurological Disease	Others	Others	Chlormezanone，a non-benzodiazepine that is used in the management of anxiety. It has been suggested for use in the treatment of muscle spasm.	273.74	80-77-3	55	200.92	<1		http://selleckchem.com/products/Chlormezanone(Trancopal).html	C11H12ClNO3S	free base	N/A	CN1C(C2=CC=C(Cl)C=C2)[S](=O)(=O)CCC1=O	1.559	3	0	1
S2024	Ketotifen Fumarate	2	b17	in 10mM DMSO	FDA,DMF,CFDA,NDC,PMDA,HMA	BP2019;KP Ⅹ;EP9.2;JP17;IP2010;Martindale:The Extra Pharmacopoeia	077354,077958	Immunology/Inflammation	Histamine Receptor	Neuronal Signaling	Ketotifen Fumarate is a fumaric acid salt of ketotifen which is a H1-antihistamine and mast cell stabilizer.	425.5	34580-14-8	8	18.8	<1		http://selleckchem.com/products/ketotifen-fumarate-zaditor.html	C23H23NO5S	Fumarate	N/A	CN1CCC(CC1)=C2C3=C(CC(=O)C4=C2C=CS4)C=CC=C3.OC(=O)\C=C\C(O)=O	0.772	3	0	2
S2025	Urapidil HCl	2	d17	in 10mM DMSO	DMF,CFDA,PMDA,HMA	JP17;Martindale:The Extra Pharmacopoeia	N/A	Neurological Disease	5-HT Receptor	Neuronal Signaling	Urapidil HCl is a hydrochloride salt form of urapidil which is α1-adrenoceptor antagonist and 5-HT1A receptor agonist with pIC50 of 6.13 and 6.4 respectively.	423.94	64887-14-5	24	56.61	85	200.5	http://selleckchem.com/products/urapidil-hydrochloride.html	C20H30ClN5O3	Hydrochloride	N/A	Cl.COC1=CC=CC=C1N2CCN(CCCNC3=CC(=O)N(C)C(=O)N3C)CC2	1.808	3	1	7
S2028	Diclazuril	2	f17	in 10mM DMSO	DMF	USP42-NF37;BP2019;EP9.2;Martindale:The Extra Pharmacopoeia	N/A	Infection	Anti-infection	Microbiology	Diclazuril is an anti-coccidial drug.	407.64	101831-37-2	16	39.25	<1		http://selleckchem.com/products/diclazuril.html	C17H9Cl3N4O2	free base	N/A	ClC1=CC=C(C=C1)C(C#N)C2=C(Cl)C=C(C=C2Cl)N3N=CC(=O)NC3=O	4.191	3	1	3
S2029	Uridine	2	h17	in 10mM DMSO	FDA,DMF,NDC	USP42-NF37;EP9.2;BP2017;IP2010;Martindale:The Extra Pharmacopoeia	208169	Cardiovascular Disease	DNA/RNA Synthesis	DNA Damage	Uridine is a nucleoside, contains a uracil attached to a ribose ring via a β-N1-glycosidic bond.	244.2	58-96-8	49	200.66	49	200.66	http://selleckchem.com/products/uridine.html	C9H12N2O6	free base	NSC 20256	OCC1OC(C(O)C1O)N2C=CC(=O)NC2=O	-2.451	3	4	2
S2030	Flunarizine 2HCl	2	j17	in 10mM DMSO	DMF,CFDA	BP2019;EP9.2;Martindale:The Extra Pharmacopoeia	N/A	Angiology/Cardiovascular Disease/Neurological Disease	Calcium Channel	Transmembrane Transporters	Flunarizine 2HCl is a dihydrochloride salt form which is a calcium channel blocker with a Ki of 68 nM.	477.42	30484-77-6	5	10.47	<1		http://selleckchem.com/products/flunarizine-dihydrochloride.html	C26H28Cl2F2N2	2HCl	KW-3149, R14950	Cl.Cl.FC1=CC=C(C=C1)C(N2CCN(CC2)C\C=C\C3=CC=CC=C3)C4=CC=C(F)C=C4	6.699	0	0	6
S2031	Fenticonazole Nitrate	2	l17	in 10mM DMSO	DMF,HMA	BP2019;EP9.2;KP Ⅹ;Martindale:The Extra Pharmacopoeia	N/A	Infection	Anti-infection	Microbiology	Fenticonazole Nitrate is an azole antifungal agent.	518.41	73151-29-8	104	200.61	<1		http://selleckchem.com/products/fenticonazole-nitrate.html	C24H21Cl2N3O4S	Nitrate	N/A	O[N+]([O-])=O.ClC1=CC=C(C(C[N]2C=CN=C2)OCC3=CC=C(SC4=CC=CC=C4)C=C3)C(=C1)Cl	5.176	2	0	8
S2032	Rebamipide	2	n17	in 10mM DMSO	DMF,CFDA,PMDA	JP17;Martindale:The Extra Pharmacopoeia	N/A	Inflammation	Others	Others	Rebamipide is a cholecystokinin type 1 (CCK1) receptor inhibitor for inhibiting [125I]BH-CCK-8S with IC50 of 37.7 μM.	370.79	90098-04-7	74	199.57	<1		http://selleckchem.com/products/rebamipide.html	C19H15ClN2O4	free base	OPC-12759	OC(=O)C(CC1=CC(=O)NC2=C1C=CC=C2)NC(=O)C3=CC=C(Cl)C=C3	2.606	3	2	5
S2036	Aspartame	2	p17	in 10mM DMSO	NDC	USP42-NF37;BP2019;EP9.2;IP2010;Martindale:The Extra Pharmacopoeia	N/A	Others	Others	Others	Aspartame is an artificial, non-saccharide sweetener used as a sugar substitute in some foods and beverages.	294.3	22839-47-0	33	112.13	4	13.59	http://selleckchem.com/products/aspartame.html	C14H18N2O5	free base	SC-18862	COC(=O)C(CC1=CC=CC=C1)NC(=O)C(N)CC(O)=O	-2.455	4	2	8
S2037	Candesartan Cilexetil	2	b19	in 10mM DMSO	FDA,DMF,CFDA,NDC,PMDA,HMA	USP42-NF37;BP2019;KP Ⅹ;EP9.2;JP17;Martindale:The Extra Pharmacopoeia	078702,091390,202079,203813,209119,210302	Cardiovascular Disease	RAAS	Endocrinology & Hormones	Candesartan Cilexetil is an angiotensin II receptor antagonist with IC50 of 0.26 nM, used in the treatment of hypertension.	610.66	145040-37-5	122	199.78	<1		http://selleckchem.com/products/Candesartan-cilexetil-Atacand.html	C33H34N6O6	free base	TCV-116	CCOC1=NC2=C([N]1CC3=CC=C(C=C3)C4=C(C=CC=C4)C5=NN=N[NH]5)C(=CC=C2)C(=O)OC(C)OC(=O)OC6CCCCC6	6.913	10	1	13
S2038	Phentolamine Mesylate	2	d19	in 10mM DMSO	FDA,DMF,CFDA,NDC,HMA	SP42-NF37;IP2010	040235,207686	Cardiovascular Disease	Adrenergic Receptor	Neuronal Signaling	Phentolamine Mesylate is a reversible and nonselective alpha-adrenergic receptor antagonist, used for the prevention or control of hypertensive episodes.	377.46	65-28-1	76	201.35	76	201.35	http://selleckchem.com/products/phentolamine-mesilate.html	C18H23N3O4S	Mesylate	N/A	CC1=CC=C(C=C1)N(CC2=NCCN2)C3=CC(=CC=C3)O.C[S](O)(=O)=O	2.555	1	2	4
S2040	Nimesulide	2	f19	in 10mM DMSO	DMF,CFDA,HMA	BP2019;EP9.2;Martindale:The Extra Pharmacopoeia	N/A	Inflammation	COX	Neuronal Signaling	Nimesulide is a relatively COX-2 selective inhibitor with IC50 of 26 μM.	308.31	51803-78-2	62	201.1	<1		http://selleckchem.com/products/Nimesulide.html	C13H12N2O5S	free base	N/A	C[S](=O)(=O)NC1=C(OC2=CC=CC=C2)C=C(C=C1)[N+]([O-])=O	2.195	3	1	5
S2041	Dyclonine HCl	2	h19	in 10mM DMSO	FDA,DMF,CFDA,NDC	USP42-NF37;Martindale:The Extra Pharmacopoeia	009925,200480	Neurological Disease	Sodium Channel	Transmembrane Transporters	Dyclonine HCl is a hydrochloride salt form of dyclonine which is an oral anaesthetic, reversibly binds to activated sodium channels on the neuronal membrane, thereby decreasing the neuronal membrane's permeability to sodium ions, leading to an increased threshold for excitation.	325.87	536-43-6	15	46.03	6	18.41	http://selleckchem.com/products/dyclonine-hydrochloride.html	C18H28ClNO2	Hydrochloride	N/A	Cl.CCCCOC1=CC=C(C=C1)C(=O)CCN2CCCCC2	4.435	2	0	8
S2042	Cyproterone Acetate	2	j19	in 10mM DMSO	DMF,CFDA,HMA	BP2019;EP9.2;KP Ⅹ;IP2010;Martindale:The Extra Pharmacopoeia	N/A	Cancer	Androgen Receptor	Endocrinology & Hormones	Cyproterone acetate is an androgen receptor (AR) antagonist with IC50 of 7.1 nM, as well as a weak progesterone receptor agonist with weak pro-gestational and glucocorticoid activity.	416.94	427-51-0	83	199.07	<1		http://selleckchem.com/products/cyproterone-acetate.html	C24H29ClO4	free base	N/A	CC(=O)OC1(CCC2C3C=C(Cl)C4=CC(=O)C5CC5C4(C)C3CCC12C)C(C)=O	3.314	4	0	3
S2043	Memantine HCl	2	l19	in 10mM DMSO	FDA,DMF,EMA,HMA,CFDA,NDC,PMDA	USP42-NF37;Martindale:The Extra Pharmacopoeia	079225,090041,090043,090044,090048,090051,090052,090058,090073,090244,090961,091585,200022,200155,200891,202350,202790,202840,203175,203293,204033,205446,205784,205825,205905,206028,206032,206135,206310,206528,206855,207236,209527,209955	Neurological Disease	P450 (e.g. CYP17),AMPA Receptor-kainate Receptor-NMDA Receptor	Neuronal Signaling	Memantine HCl is a CYP2B6 and CYP2D6 inhibitor for recombinant CYP2B6 and CYP2D6 with Ki of 0.51 nM and 94.9 μM, respectively.	215.76	41100-52-1	43	199.3	30	139.04	http://selleckchem.com/products/memantine-hydrochloride-namenda.html	C12H22ClN	Hydrochloride	N/A	Cl.CC12C[CH]3CC(C)([CH2]1)C[C](N)(C3)C2	2.289	0	1	0
S2044	Cyproheptadine HCl	2	n19	in 10mM DMSO	FDA,DMF,CFDA,NDC,PMDA	USP42-NF37;BP2019;EP9.2;KP Ⅹ;JP17;IP2010;Martindale:The Extra Pharmacopoeia	040537,040644,040668,085245,086165,086580,086678,086737,086808,086833,087001,087056,087129,087284,087405,087566,087685,087839,088205,088212,088232,088798,089021,089057,089199,091295,203191,204823,205087,206553,206676,207555,207783,208938,209108,209172,212423	Immunology	Histamine Receptor	Neuronal Signaling	Cyproheptadine HCl is a hydrochloride salt form of cyproheptadine which is a histamine receptor antagonist.	323.86	969-33-5	65	200.7	<1		http://selleckchem.com/products/cyproheptadine-hydrochloride-periactin.html	C21H22ClN	Hydrochloride	N/A	Cl.CN1CCC(CC1)=C2C3=C(C=CC=C3)C=CC4=C2C=CC=C4	4.744	0	0	0
S2045	Doxifluridine	2	p19	in 10mM DMSO	CFDA,PMDA	JP17;Martindale:The Extra Pharmacopoeia	N/A	Cancer	Phosphorylase	Others	Doxifluridine is an oral prodrug that is converted to the cytotoxic agent 5-fluorouracil (5-FU).	246.19	3094-09-5	49	199.03	49	199.03	http://selleckchem.com/products/doxifluridine.html	C9H11FN2O5	free base	5'-DFUR, AMC 0101	CC1OC(C(O)C1O)N2C=C(F)C(=O)NC2=O	-1.653	3	3	1
S2046	Pioglitazone HCl	2	b21	in 10mM DMSO	FDA,DMF,EMA,HMA,CFDA,NDC,PMDA	USP42-NF37;BP2019;EP9.2;JP17;IP2010;Martindale:The Extra Pharmacopoeia	076798,076801,077210,078383,078472,078670,091298,200044,200268,202456,202467,204133,206738,207806	Endocrinology/Metabolic Disease	P450 (e.g. CYP17)	Metabolism	Pioglitazone HCl is a selective peroxisome proliferator-activated receptor-gamma (PPARgamma) agonist, used to treat diabetes.	392.9	112529-15-4	79	201.07	<1		http://selleckchem.com/products/pioglitazone-hydrochloride-actos.html	C19H21ClN2O3S	Hydrochloride	AD-4833, U-72107E	Cl.CCC1=CC=C(CCOC2=CC=C(CC3SC(=O)NC3=O)C=C2)N=C1	4.289	4	1	7
S2051	Captopril	2	d21	in 10mM DMSO	FDA,DMF,CFDA,NDC,PMDA,HMA	USP42-NF37;BP2019;KP Ⅹ;EP9.2;Ph.Int_6th;JP17;IP2010;Martindale:The Extra Pharmacopoeia	074322,074363,074386,074418,074423,074433,074434,074451,074462,074472,074477,074481,074483,074493,074505,074519,074532,074576,074590,074640,074677,074737,074748	Cardiovascular Disease	RAAS	Endocrinology & Hormones	Captopril is an angiotensin-converting enzyme (ACE) inhibitor with IC50 of 6 nM.	217.29	62571-86-2	43	197.89	2	9.2	http://selleckchem.com/products/captopril-capoten.html	C9H15NO3S	free base	SQ 14225	CC(CS)C(=O)N1CCCC1C(O)=O	0.667	2	0	3
S2052	Oxytetracycline Dihydrate	2	f21	in 10mM DMSO	FDA,DMF,CFDA,PMDA	EP9.2;JP17;BP2017 ;Ph.Int_5th;Martindale:The Extra Pharmacopoeia	060634,060760,060770,060869	Infection	Anti-infection	Microbiology	Oxytetracycline Dihydrate is a prescription antibiotic, interfering with the ability of bacteria to produce essential proteins.	496.46	6153-64-6	5	10.07	<1		http://selleckchem.com/products/oxytetracycline-dihydrate.html	C22H28N2O11	Dihydrate	N/A	O.O.CN(C)C1C2C(O)C3C(=C(O)C2(O)C(=O)C(=C1O)C(N)=O)C(=O)C4=C(O)C=CC=C4C3(C)O	-2.309	3	5	2
S2053	Cytidine	2	h21	in 10mM DMSO	DMF,CFDA	Martindale:The Extra Pharmacopoeia	N/A	Cancer	Others	Others	Cytidine is a nucleoside molecule that is formed when cytosine is attached to a ribose ring, cytidine is a component of RNA.	243.22	65-46-3	49	201.46	49	201.46	http://selleckchem.com/products/cytidine.html	C9H13N3O5	free base	N/A	NC1=NC(=O)N(C=C1)C2OC(CO)C(O)C2O	-2.396	3	4	2
S2054	Orphenadrine Citrate	2	j21	in 10mM DMSO	FDA,DMF,NDC	USP42-NF37;BP2019;EP9.2;IP2010;Martindale:The Extra Pharmacopoeia	040249,040284,040327,040368,040463,040484,084303,084779,085046,087062,088067,090585,091158	Neurological Disease	AChR	Neuronal Signaling	Orphenadrine Citrate is a skeletal muscle relaxant, it acts in the central nervous system to produce its muscle relaxant effects.	461.5	4682-36-4	92	199.35	<1		http://selleckchem.com/products/orphenadrine-citrate-norflex.html	C24H31NO8	Citrate	N/A	CN(C)CCOC(C1=CC=CC=C1)C2=CC=CC=C2C.OC(=O)CC(O)(CC(O)=O)C(O)=O	-0.483	4	0	11
S2055	Gimeracil	2	l21	in 10mM DMSO	EMA,CFDA	N/A	N/A	Cancer/Gastroenterology/Respiratory Disease	Dehydrogenase	Metabolism	Gimeracil is an inhibitor of dihydropyrimidine dehydrogenase, which inhibits the early step in homologous recombination for double strand breaks repair.	145.54	103766-25-2	29	199.26	<1		http://selleckchem.com/products/gimeracil.html	C5H4ClNO2	free base	N/A	OC1=CC(=O)NC=C1Cl	-0.493	1	2	0
S2057	Cyclophosphamide Monohydrate	2	n21	in 10mM DMSO	FDA,DMF,CFDA,NDC,PMDA,HMA	USP42-NF37;BP2019;EP9.2;KP Ⅹ;Ph.Int_6th;JP17;IP2010;Martindale:The Extra Pharmacopoeia	040032,040745,088371,088372,088373,088374,203856,204555,207014,209872,210046,211608	Cancer/Hematology	DNA alkylator	DNA Damage	Cyclophosphamide Monohydrate is a nitrogen mustard alkylating agent, it attaches the alkyl group to the guanine base of DNA, shown to crosslink DNA, causing strand breakage and inducing mutations.	279.1	6055-19-2	55	197.06	7	25.08	http://selleckchem.com/products/cyclophosphamide-monohydrate.html	C7H17Cl2N2O3P	Monohydrate	N/A	O.ClCCN(CCCl)[P]1(=O)NCCCO1	-0.063	2	1	5
S2058	Tolnaftate	2	p21	in 10mM DMSO	DMF,NDC,PMDA	USP42-NF37;BP2019;EP9.2;JP17;Martindale:The Extra Pharmacopoeia	N/A	Infection	Anti-infection	Microbiology	Tolnaftate is a synthetic thiocarbamate used as an anti-fungal agent.	307.41	2398-96-1	62	201.69	<1		http://selleckchem.com/products/tolnaftate.html	C19H17NOS	free base	N/A	CN(C(=S)OC1=CC=C2C=CC=CC2=C1)C3=CC(=CC=C3)C	6.289	1	0	4
S2059	Terazosin HCl Dihydrate	2	a4	in 10mM DMSO	FDA,DMF,CFDA,NDC,PMDA,HMA	USP42-NF37;BP2019;EP9.2;KP Ⅹ;IP2010;Martindale:The Extra Pharmacopoeia	074315,074446,074530,074657,074823,075140,075317,075384,075498,075614,075667,076021	Cardiovascular Disease	Adrenergic Receptor	Neuronal Signaling	Terazosin HCl is a selective α1-adrenoceptor antagonist, used for treatment of symptoms of an enlarged prostate (BPH).	459.92	70024-40-7	26	56.53	<1		http://selleckchem.com/products/terazosin-hydrochloride-hytrin.html	C19H30ClN5O6	HCl & Dihydrate	N/A	O.O.Cl.COC1=CC2=C(C=C1OC)C(=NC(=N2)N3CCN(CC3)C(=O)C4CCCO4)N	1.348	6	1	4
S2060	Bromhexine HCl	2	c4	in 10mM DMSO	CFDA,PMDA,HMA	BP2019;EP9.2;KP Ⅹ;JP17;IP2010;Martindale:The Extra Pharmacopoeia	N/A	Respiratory Disease	Others	Others	Bromhexine HCl is a medication prescribed for coughs which works by dissolving hard phlegm.	412.59	611-75-6	6	14.54	<1		http://selleckchem.com/products/bromhexine-hydrochloride.html	C14H21Br2ClN2	HCl	N/A	Cl.CN(CC1=CC(=CC(=C1N)Br)Br)C2CCCCC2	4.894	0	1	3
S2061	Lovastatin	2	e4	in 10mM DMSO	FDA,DMF,CFDA,NDC,HMA	USP42-NF37;BP2019;KP Ⅹ;EP9.2;Martindale:The Extra Pharmacopoeia	075300,075451,075551,075636,075828,075935,075991,077520,077748,078296	Cardiovascular Disease	HMG-CoA Reductase	Metabolism	Lovastatin is an inhibitor of HMG-CoA reductase with IC50 of 3.4 nM in a cell-free assay, used for lowering cholesterol (hypolipidemic agent).	404.54	75330-75-5	8	19.78	<1		http://selleckchem.com/products/lovastatin-mevacor.html	C24H36O5	free base	MK-803	CCC(C)C(=O)OC1CC(C)C=C2C=CC(C)C(CCC3CC(O)CC(=O)O3)C12	4.218	4	1	7
S2062	Tiopronin	2	g4	in 10mM DMSO	FDA,DMF,CFDA,NDC,PMDA	Martindale:The Extra Pharmacopoeia	019569	Metabolic Disease	ROS	Immunology & Inflammation	Tiopronin is an antioxidant agent, used for the treatment of cystinuria by controlling the rate of cystine precipitation and excretion.	163.19	1953-02-2	32	196.09	32	196.09	http://selleckchem.com/products/tiopronin-thiola.html	C5H9NO3S	free base	N/A	CC(S)C(=O)NCC(O)=O	-0.362	2	1	3
S2064	Balofloxacin	2	i4	in 10mM DMSO	CFDA	Martindale:The Extra Pharmacopoeia	N/A	Infection	Topoisomerase	DNA Damage	Balofloxacin is a quinolone antibiotic, inhibiting the synthesis of bacterial DNA by interference with the enqyme DNA gyrase.	389.42	127294-70-6	5	12.84	<1		http://selleckchem.com/products/balofloxacin.html	C20H24FN3O4	free base	N/A	CNC1CCCN(C1)C2=C(OC)C3=C(C=C2F)C(=O)C(=CN3C4CC4)C(O)=O	-0.615	3	1	5
S2065	Lafutidine	2	k4	in 10mM DMSO	CFDA,PMDA	JP17;Martindale:The Extra Pharmacopoeia	N/A	Inflammation/Gastrointestinal Disease/Respiratory Disease	Histamine Receptor	Neuronal Signaling	Lafutidine, a newly developed histamine H(2)-receptor antagonist, inhibits gastric acid secretion.	431.55	118288-08-7	86	199.28	<1		http://selleckchem.com/products/lafutidine.html	C22H29N3O4S	free base	FRG-8813	O=C(C[S](=O)CC1=CC=CO1)NC\C=C/COC2=CC(=CC=N2)CN3CCCCC3	1.987	5	1	11
S2066	Moxonidine	2	m4	in 10mM DMSO	DMF,CFDA,HMA	BP2019;EP9.2;Martindale:The Extra Pharmacopoeia	N/A	Cardiovascular Disease	Others	Others	Moxonidine is a selective agonist at the imidazoline receptor subtype 1, used as antihypertensive agent.	241.68	75438-57-2	24	99.3	<1		http://selleckchem.com/products/moxonidine.html	C9H12ClN5O	free base	BDF5895	COC1=NC(=NC(=C1NC2=NCCN2)Cl)C	0.598	4	2	3
S2067	Ozagrel HCl	2	o4	in 10mM DMSO	CFDA,PMDA	JP17;Martindale:The Extra Pharmacopoeia	N/A	Angiology/Neurological Disease	P450 (e.g. CYP17)	Metabolism	Ozagrel HCl is a selective <n>thromboxane A(2) (TXA(2)) synthetase inhibitor with IC50 of 11 nM for rabbit platelet, used for the improvement of postoperative cerebrovascular contraction and accompanying cerebral ischaemia.	264.71	78712-43-3	52	196.44	52	196.44	http://selleckchem.com/products/ozagrel-hydrochloride.html	C13H13ClN2O2	HCl	OKY-046 HCl	Cl.OC(=O)/C=C/C1=CC=C(C[N]2C=CN=C2)C=C1	1.986	2	0	4
S2069	Argatroban	2	a6	in 10mM DMSO	FDA,DMF,CFDA,NDC,PMDA,HMA	USP42-NF37;JP17;Martindale:The Extra Pharmacopoeia	020883,022359,079238,091665,201811,202626,203049,204120,206698,212035	Hematology	Thrombin	Others	Argatroban is a potent and selective synthetic thrombin inhibitor with Ki ranging from 5 nM to 39 nM, used as an anticoagulant.	508.63	74863-84-6	9	17.69	<1		http://selleckchem.com/products/argatroban.html	C23H36N6O5S	free base	MCI-9038	CC1CCN(C(C1)C(O)=O)C(=O)C(CCCNC(N)=N)N[S](=O)(=O)C2=CC=CC3=C2NCC(C)C3	1.266	4	4	10
S2071	Prulifloxacin (NM441, AF 3013)	2	c6	in 10mM DMSO	DMF,PMDA,HMA	Martindale:The Extra Pharmacopoeia	N/A	Infection	Others	Others	Prulifloxacin, the prodrug of ulifloxacin, is a broad-spectrum oral fluoroquinolone antibacterial agent.	461.46	123447-62-1	11	23.84	<1		http://www.selleckchem.com/products/prulifloxacin-pruvel.html	C21H20FN3O6S	Free Base	N/A	CC1SC2=C(C(O)=O)C(=O)C3=CC(=C(C=C3N12)N4CCN(CC4)CC5=C(C)OC(=O)O5)F	0.031	5	0	4
S2072	Seratrodast(AA-2414, ABT-001)	2	e6	in 10mM DMSO	CFDA,PMDA	Martindale the Extra Pharmacopoei	N/A	Immunology	Others	Others	Seratrodast is a potent and selective thromboxane A2 receptor (TP) antagonist with IC50 of 40 nM used primarily in the treatment of asthma and used as anti-inflammatory agent.	354.44	112665-43-7	71	200.32	<1		http://www.selleck.cn/products/seratrodast.html	C22H26O4	Free Base	N/A	CC1=C(C)C(=O)C(=C(C)C1=O)C(CCCCCC(O)=O)C2=CC=CC=C2	5.216	3	0	8
S2075	Rosiglitazone HCl	2	g6	in 10mM DMSO	FDA,DMF,EMA,CFDA,NDC	USP42-NF37;IP2010;Martindale:The Extra Pharmacopoeia	076748,078023	Endocrinology/Metabolic Disease	PPAR	Metabolism	Rosiglitazone HCl is a blood glucose-lowering drugs, stimulating insulin secretion by binding to the PPAR receptors in fat cells.	393.89	302543-62-0	79	200.56	<1		http://selleckchem.com/products/rosiglitazone-hydrochloride.html	C18H20ClN3O3S	HCl	BRL-49653 HCl	Cl.CN(CCOC1=CC=C(CC2SC(=O)NC2=O)C=C1)C3=CC=CC=N3	3.65	4	1	7
S2077	Atorvastatin Calcium	2	i6	in 10mM DMSO	FDA,DMF,CFDA,NDC,PMDA,HMA	USP42-NF37;BP2019;KP Ⅹ;EP9.2;JP17;IP2010;Martindale:The Extra Pharmacopoeia	076477,077575,078773,090548,091226,091624,091650,202357,204846,204991,205300,205519,206536,207687,209288,209912,211933	Cardiovascular Disease	HMG-CoA Reductase	Metabolism	Atorvastatin Calcium is an inhibitor of HMG-CoA reductase used as a cholesterol-lowering medication that blocks the production of cholesterol.	1155.34	134523-03-8	100	86.55	<1		http://selleckchem.com/products/atorvastatin-calcium-lipitor.html	C66H68CaF2N4O10	Calcium	N/A	[Ca++].CC(C)C1=C(C(=O)NC2=CC=CC=C2)C(=C([N]1CCC(O)CC(O)CC([O-])=O)C3=CC=C(F)C=C3)C4=CC=CC=C4.CC(C)C5=C(C(=O)NC6=CC=CC=C6)C(=C([N]5CCC(O)CC(O)CC([O-])=O)C7=CC=C(F)C=C7)C8=CC=CC=C8	8.163	2	6	24
S2078	Famotidine	2	k6	in 10mM DMSO	FDA,DMF,CFDA,NDC,PMDA,HMA	USP42-NF37;BP2019;EP9.2;KP Ⅹ;JP17;Martindale:The Extra Pharmacopoeia	075062,075192,075193,075194,075302,075311,075312,075400,075404,075457,075488,075511,075512,075607,075610,075611,075639,075650,075651,075674,075684,075704,075705,075707,075709,075715,075718,075758,075786,075793,075799,075805,075870,075905,075942,076101,077146,077351,077352,077367,078641,078916,090283,090440,090837,091020,201695,201995,206530,206531	Gastrointestinal Disease	Histamine Receptor	Neuronal Signaling	Famotidine is a histamine H2–receptor antagonist with IC50 of 0.6 mM, commonly used to treat heartburn, GERD, ulcers, and other digestive conditions.	337.45	76824-35-6	67	198.55	<1		http://selleckchem.com/products/famotidine-pepcid.html	C8H15N7O2S3	free base	MK208	NC(=N)NC1=NC(=CS1)CSCCC(=N)N[S](N)(=O)=O	-1.328	3	4	9
S2079	Moexipril HCl	2	m6	in 10mM DMSO	FDA,DMF,NDC,HMA	USP42-NF37;Martindale:The Extra Pharmacopoeia	076204,077536,078454,090416	Cardiovascular Disease	RAAS	Endocrinology & Hormones	Moexipril HCl is a potent orally active nonsulfhydryl angiotensin converting enzyme (ACE) inhibitor, used for the treatment of hypertension and congestive heart failure.	535.03	82586-52-5	20	37.38	<1		http://selleckchem.com/products/moexipril-hydrochloride.html	C27H35ClN2O7	Hydrochloride	RS-10085	Cl.CCOC(=O)C(CCC1=CC=CC=C1)NC(C)C(=O)N2CC3=CC(=C(OC)C=C3CC2C(O)=O)OC	1.005	6	1	12
S2080	Clevidipine Butyrate	2	o6	in 10mM DMSO	DMF,HMA	N/A	N/A	Cardiovascular Disease	Calcium Channel	Transmembrane Transporters	Clevidipine Butyrate is a dihydropyridine calcium channel blocker, uses as an agent for the reduction of blood pressure.	456.32	167221-71-8	91	199.42	<1		http://selleckchem.com/products/cleviprex-clevidipine.html	C21H23Cl2NO6	free base	N/A	CCCC(=O)OCOC(=O)C1=C(C)NC(=C(C1C2=CC=CC(=C2Cl)Cl)C(=O)OC)C	4.145	6	1	10
S2082	Adiphenine HCl	2	a8	in 10mM DMSO	N/A	Martindale the Extra Pharmacopoei	N/A	Neurological Disease	AChR	Neuronal Signaling	Adiphenine HCl is a nicotinic receptor inhibitor with IC50 of 15 μM, used as an antispasmodic drug.	347.88	50-42-0	30	86.24	70	201.22	http://selleckchem.com/products/adiphenine-hcl.html	C20H26ClNO2	HCl	N/A	Cl.CCN(CC)CCOC(=O)C(C1=CC=CC=C1)C2=CC=CC=C2	4.433	2	0	9
S2083	Procaterol HCl	2	c8	in 10mM DMSO	DMF,CFDA	KP Ⅹ;JP17;Martindale:The Extra Pharmacopoeia	N/A	Immunology	Adrenergic Receptor	Neuronal Signaling	Procaterol HCl is a short-acting β2-adrenergic receptor agonist with K<sub>p</sub> of 8 nM, used for the treatment of asthma	326.82	62929-91-3	65	198.89	65	198.89	http://www.selleckchem.com/products/procaterol-hcl.html	C16H22N2O3.HCl	hydrochloride	OPC-2009	Cl.CCC(NC(C)C)C(O)C1=CC=C(O)C2=C1C=CC(=O)N2	2.781	1	4	5
S2084	Duloxetine HCl	2	e8	in 10mM DMSO	FDA,DMF,EMA,HMA,CFDA,NDC	USP42-NF37;BP2019;EP9.2;Martindale:The Extra Pharmacopoeia	090669,090694,090723,090728,090739,090745,090773,090774,090775,090776,090778,090780,090783,202045,202336,202949,203088,203197,204343,204815,206653,208706,210599,211310	Neurological Disease/Psychotic disorders	5-HT Receptor	Neuronal Signaling	Duloxetine HCl is a serotonin-norepinephrine reuptake inhibitor with Ki of 4.6 nM, used for treatment of major depressive disorder and generalized anxiety disorder (GAD).	333.88	136434-34-9	67	200.67	<1		http://selleckchem.com/products/duloxetine-hcl-cymbalta.html	C18H20ClNOS	HCl	LY-248686 HCl	Cl.CNCCC(OC1=C2C=CC=CC2=CC=C1)C3=CC=CS3	4.228	1	1	6
S2085	Trimebutine	2	g8	in 10mM DMSO	DMF,CFDA,PMDA	EP9.3;BP2019;KP Ⅹ;JP17;Martindale:The Extra Pharmacopoeia	N/A	Gastroenterology	Opioid Receptor	Neuronal Signaling	Trimebutine is an agonist of peripheral mu, kappa and delta opiate receptors, used as spasmolytic agent for treatment of both acute and chronic abdominal pain.	387.47	39133-31-8	50	129.04	<1		http://selleckchem.com/products/trimebutine.html	C22H29NO5	free base	Mebutin	CCC(COC(=O)C1=CC(=C(OC)C(=C1)OC)OC)(N(C)C)C2=CC=CC=C2	4.115	5	0	10
S2086	Ivabradine HCl	2	i8	in 10mM DMSO	FDA,DMF,EMA,HMA,NDC	Martindale:The Extra Pharmacopoeia	206143,209964	Cardiovascular Disease/Endocrinology	Adrenergic Receptor	Neuronal Signaling	Ivabradine HCl, a new If inhibitor with IC 50 of 2.9 μM which acts specifically on the pacemaker activity of the sinoatrial node, is a pure heart rate lowering agent.	505.05	148849-67-6	101	199.98	82	162.36	http://selleckchem.com/products/ivabradine-hcl-procoralan.html	C27H37ClN2O5	HCl	S 16257-2	Cl.COC1=CC2=C(CC(=O)N(CCCN(C)CC3CC4=CC(=C(OC)C=C34)OC)CC2)C=C1OC	3.753	5	0	10
S2087	Rivastigmine Tartrate	2	k8	in 10mM DMSO	FDA,DMF,CFDA,NDC,HMA	USP42-NF37;BP2019;EP9.2;Martindale:The Extra Pharmacopoeia	077129,077130,077131,090879,091072,091689,203148,203844,204572,207797	Neurological Disease	AChR	Neuronal Signaling	Rivastigmine Tartrate is a cholinesterase inhibitor with IC50 of 5.5 μM, and used as a parasympathomimetic or cholinergic agent for the treatment of mild to moderate Alzheimer disease.	400.42	129101-54-8	42	104.89	80	199.79	http://selleckchem.com/products/rivastigmine-tartrate-exelon.html	C18H28N2O8	Tartrate	ENA 713	CCN(C)C(=O)OC1=CC=CC(=C1)C(C)N(C)C.OC(C(O)C(O)=O)C(O)=O	-2.099	4	2	8
S2090	Dexmedetomidine HCl	2	m8	in 10mM DMSO	FDA,DMF,EMA,HMA,CFDA,NDC,PMDA	USP42-NF37;Martindale:The Extra Pharmacopoeia	091465,201072,202126,202585,202881,203773,203972,204023,204686,204843,205046,205272,205867,206628,206798,207551,208129,208129,208532,209065	Neurological Disease/Psychotic disorders	Adrenergic Receptor	Neuronal Signaling	Dexmedetomidine HCl is a highly selective and potent alpha-2 adrenoceptor agonist, which reduces anesthetic requirements for patients by providing significant sedation.	236.74	145108-58-3	48	202.75	<1		http://selleckchem.com/products/dexmedetomidine-hcl-precedex.html	C13H17ClN2	HCl	N/A	Cl.CC(C1=CN=C[NH]1)C2=CC=CC(=C2C)C	3.378	1	1	2
S2091	Betaxolol	2	o8	in 10mM DMSO	FDA,DMF,CFDA,NDC,PMDA,HMA	USP42-NF37;BP2019;EP9.2;KP Ⅹ;JP17;Martindale:The Extra Pharmacopoeia	075386,075446,075541,075630,078694,078962	Cardiovascular Disease/Ophthalmology	Adrenergic Receptor	Neuronal Signaling	Betaxolol is a selective beta1 adrenergic receptor blocker used in the treatment of hypertension and glaucoma.	307.43	63659-18-7	62	201.67	62	201.67	http://selleckchem.com/products/betaxolol-betoptic.html	C18H29NO3	free base	SL 75212	CC(C)NCC(O)COC1=CC=C(CCOCC2CC2)C=C1	2.577	2	2	11
S2092	Detomidine HCl	2	a10	in 10mM DMSO	DMF	USP42-NF37;BP2019;EP9.2;Martindale:The Extra Pharmacopoeia	N/A	Neurological Disease	Adrenergic Receptor	Neuronal Signaling	Detomidine HCl produce dose-dependent sedative and analgesic effects, mediatated by activation of α2 catecholamine receptors.	222.71	90038-01-0	45	202.06	45	202.06	http://selleckchem.com/products/detomidine-hcl.html	C12H15ClN2	HCl	N/A	Cl.CC1=C(C)C(=CC=C1)CC2=C[NH]C=N2	3.053	1	1	2
S2096	Almotriptan Malate	2	c10	in 10mM DMSO	FDA,DMF,NDC,HMA	USP42-NF37;Martindale:The Extra Pharmacopoeia	078027,205171,205523	Neurological Disease	5-HT Receptor	Neuronal Signaling	Almotriptan Malate is a selective 5-hydroxytryptamine1B/1D (5-HT1B/1D) receptor agonist, used for the treatment of Migraine attacks in adults.	469.55	181183-52-8	94	200.19	<1		http://selleckchem.com/products/almotriptan-malate-axert.html	C21H31N3O7S	Malate	LAS 31416	CN(C)CCC1=C[NH]C2=CC=C(C[S](=O)(=O)N3CCCC3)C=C12.OC(CC(O)=O)C(O)=O	-1.943	4	2	9
S2097	Ambrisentan	2	e10	in 10mM DMSO	FDA,DMF,EMA,HMA,CFDA,NDC,PMDA	Martindale:The Extra Pharmacopoeia	208252,208354,208441,209509,210058,210715,210784	Cardiovascular Disease	Endothelin Receptor	GPCR & G Protein	Ambrisentan is a highly selective antagonist of the endothelin-1 type A receptor, used in the treatment of pulmonary arterial hypertension (PAH).	378.42	177036-94-1	76	200.84	<1		http://selleckchem.com/products/ambrisentan.html	C22H22N2O4	free base	LU-208075,BSF-208075	COC(C(OC1=NC(=CC(=N1)C)C)C(O)=O)(C2=CC=CC=C2)C3=CC=CC=C3	3.659	5	0	7
S2098	Bexarotene	2	g10	in 10mM DMSO	FDA,DMF,EMA,NDC,PMDA	Martindale:The Extra Pharmacopoeia	203174,209861,209886,210105	Cancer	Retinoid Receptor	Metabolism	Bexarotene is a retinoid specifically selective for retinoid X receptors, used as an oral antineoplastic agent in the treatment of cutaneous T-cell lymphoma.	348	153559-49-0	8	22.99	<1		http://selleckchem.com/products/bexarotene.html	C24H28O2	free base	LGD1069	CC1=CC2=C(C=C1C(=C)C3=CC=C(C=C3)C(O)=O)C(C)(C)CCC2(C)C	6.405	1	0	3
S2099	Temocapril HCl	2	i10	in 10mM DMSO	PMDA,HMA	JP17;Martindale:The Extra Pharmacopoeia	N/A	Cardiovascular Disease	RAAS	Endocrinology & Hormones	Temocapril HCl is the hydrochloride of Temocapril, which is a long-acting angiotensin-converting enzyme (ACE) inhibitor, used for the treatment of hypertension.	513.07	110221-44-8	103	200.75	<1		http://selleckchem.com/products/temocapril-hcl.html	C23H29ClN2O5S2	Hydrochloride	CS-622 HCl	Cl.CCOC(=O)C(CCC1=CC=CC=C1)NC2CSC(CN(CC(O)=O)C2=O)C3=CC=CS3	0.787	4	1	11
S2101	Gabexate Mesylate	2	k10	in 10mM DMSO	CFDA	KP Ⅹ;JP17;Martindale:The Extra Pharmacopoeia	N/A	Cardiovascular Disease/Hematology	Serine Protease	Proteases	Gabexate Mesylate is a serine protease inhibitor with IC50 of 0.19 μM which is used therapeutically in the treatment of pancreatitis and disseminated intravascular coagulation.	417.48	56974-61-9	83	198.81	12	28.74	http://selleckchem.com/products/gabexate-mesylate.html	C17H27N3O7S	Mesylate	N/A	CCOC(=O)C1=CC=C(OC(=O)CCCCCNC(N)=N)C=C1.C[S](O)(=O)=O	1.774	4	2	12
S2102	Rasagiline Mesylate	2	m10	in 10mM DMSO	FDA,DMF,NDC	Martindale:The Extra Pharmacopoeia	201823,201889,201892,201899,201950,201970,201971,207004	Neurological Disease	MAO	Metabolism	Rasagiline Mesylate is a new MAO-B inhibitor for the treatment of idiopathic Parkinson's disease.	267.34	161735-79-1	53	198.25	53	198.25	http://selleckchem.com/products/rasagiline-mesylate.html	C13H17NO3S	Mesylate	TVP-1012	C[S](O)(=O)=O.C#CCNC1CCC2=CC=CC=C12	2.705	0	1	2
S2103	Naltrexone HCl	2	o10	in 10mM DMSO	FDA,DMF,EMA,HMA,CFDA,NDC	USP42-NF37;BP2019;EP9.2;IP2010;Martindale:The Extra Pharmacopoeia	074918,075274,075434,076264,090356,091205,207905	Psychotic disorders	Opioid Receptor	Neuronal Signaling	Naltrexone HCl is an opioid receptor antagonist used primarily in the management of alcohol dependence and opioid dependence.	377.86	16676-29-2	14	37.05	14	37.05	http://selleckchem.com/products/naltrexone-hcl.html	C20H24ClNO4	Hydrochloride	N/A	Cl.OC1=CC=C2CC3N(CCC45C(OC1=C24)C(=O)CCC35O)CC6CC6	2.039	2	1	2
S2104	Levosulpiride	2	a12	in 10mM DMSO	marketed in Italy	Martindale:The Extra Pharmacopoeia	N/A	Psychotic disorders	Dopamine Receptor	Neuronal Signaling	Levosulpiride is a selective antagonist for D2 dopamine receptors used as an antipsychotic and prokinetic agent.	341.43	23672-07-3	69	202.09	<1		http://selleckchem.com/products/levosulpiride-levogastrol.html	C15H23N3O4S	free base	N/A	CCN1CCCC1CNC(=O)C2=C(OC)C=CC(=C2)[S](N)(=O)=O	0.704	4	2	6
S2105	Pantoprazole	2	c12	in 10mM DMSO	FDA,DMF,EMA,HMA,CFDA,NDC	USP42-NF37;BP2019;EP9.6;IP2010;CP2005;Martindale:The Extra Pharmacopoeia	022226,077056,077058,077619,078281,079197,090074,090296,090797,090807,090901,090970,091231,200794,200821,202038,202052,202882,203024,204400,205119,205675,208580,209463,209524,211368	Gastroenterology	Proton Pump	Transmembrane Transporters	Pantoprazole is a proton pump inhibitor used for short-term treatment of erosion and ulceration of the esophagus caused by gastroesophageal reflux disease.	383.37	102625-70-7	76	198.24	<1		http://selleckchem.com/products/pantoprazole-protonix.html	C16H15F2N3O4S	free base	N/A	COC1=C(OC)C(=NC=C1)C[S](=O)C2=NC3=CC=C(OC(F)F)C=C3[NH]2	2.737	6	1	7
S2108	Flunixin Meglumin	2	e12	in 10mM DMSO	N/A	USP42-NF37;BP2019;EP9.2	N/A	Inflammation/Neurological Disease	COX	Neuronal Signaling	Flunixin Meglumin is a potent inhibitor of the enzyme cyclooxygenase (COX) used as analgesic agent with anti-inflammatory and antipyretic activity.	491.46	42461-84-7	98	199.41	98	199.41	http://selleckchem.com/products/flunixin-meglumin.html	C21H28F3N3O7	Meglumin	N/A	CNCC(O)C(O)C(O)C(O)CO.CC1=C(C=CC=C1NC2=NC=CC=C2C(O)=O)C(F)(F)F	-1.676	2	7	10
S2109	Imidapril HCl	2	g12	in 10mM DMSO	DMF,CFD,PMDA,HMA	JP17;Martindale:The Extra Pharmacopoeia	N/A	Cardiovascular Disease	RAAS	Endocrinology & Hormones	Imidapril HCl is an angiotensin-converting enzyme (ACE) inhibitor with IC50 of 2.6 nM, used for the treatment of hypertension.	441.91	89396-94-1	88	199.14	54	122.2	http://selleckchem.com/products/imidapril-tanatril.html	C20H27N3O6	Hydrochloride	N/A	Cl.CCOC(=O)C(CCC1=CC=CC=C1)NC(C)C(=O)N2C(CN(C)C2=O)C(O)=O	-1.197	5	1	10
S2111	Lapatinib	2	i12	in 10mM DMSO	FDA,DMF,EMA,NDC,PMDA	Martindale:The Extra Pharmacopoeia	203007	Cancer	EGFR,HER2	Protein Tyrosine Kinase	Lapatinib, used in the form of Lapatinib Ditosylate, is a potent EGFR and ErbB2 inhibitor with IC50 of 10.8 and 9.2 nM in cell-free assays, respectively.	581.06	231277-92-2	100	172.1	<1		http://selleckchem.com/products/lapatinib.html	C29H26ClFN4O4S	free base	GW-572016, GSK572016	C[S](=O)(=O)CCNCC1=CC=C(O1)C2=CC=C3N=CN=C(NC4=CC=C(OCC5=CC=CC(=C5)F)C(=C4)Cl)C3=C2	6.041	6	2	11
S2113	Cisatracurium Besylate	2	k12	in 10mM DMSO	FDA,DMF,CFDA,NDC,HMA	USP42-NF37;EP9.4;BP2019;Martindale:The Extra Pharmacopoeia	200159,203183,203236,203238,205873,209132,209334,211668,211669	Neurological Disease	Adrenergic Receptor	Neuronal Signaling	Cisatracurium Besylate is a nondepolarizing neuromuscular blocking agent, antagonizing the action of acetylcholine by inhibiting neuromuscular transmission.	1243.48	96946-42-8	249	200.24	47	37.8	http://selleckchem.com/products/cisatracurium-besylate-nimbex.html	C65H82N2O18S2	Besylate	N/A	COC1=CC=C(CC2C3=CC(=C(OC)C=C3CC[N+]2(C)CCC(=O)OCCCCCOC(=O)CC[N+]4(C)CCC5=CC(=C(OC)C=C5C4CC6=CC=C(OC)C(=C6)OC)OC)OC)C=C1OC.[O-][S](=O)(=O)C7=CC=CC=C7.[O-][S](=O)(=O)C8=CC=CC=C8	3.646	12	0	28
S2114	Dronedarone HCl	2	m12	in 10mM DMSO	FDA,DMF,EMA,HMA,NDC	USP42-NF37;Martindale:The Extra Pharmacopoeia	205682,205895,205903	Cardiovascular Disease	Potassium Channel,Sodium Channel,Calcium Channel	Transmembrane Transporters	Dronedarone HCl is a multichannel blocker targeting potassium channel, sodium channel and calcium channel, used as an antiarrhythmic drug for treatment of atrial fibrillation (AF).	593.22	141625-93-6	80	134.86	<1		http://selleckchem.com/products/dronedarone-hcl-multaq.html	C31H45ClN2O5S	HCl	SR33589	Cl.CCCCN(CCCC)CCCOC1=CC=C(C=C1)C(=O)C2=C(CCCC)OC3=CC=C(N[S](C)(=O)=O)C=C23	7.397	5	1	18
S2116	Conivaptan HCl	2	o12	in 10mM DMSO	FDA,NDC	Martindale:The Extra Pharmacopoeia	021697,022016	Hematology	Vasopressin Receptor	GPCR & G Protein	Conivaptan HCl is an orally active, non-peptide, vasopressin V1A and V2 receptor antagonist, used in the treatment of euvolemic and hypervolemic hyponatremia.	535.04	168626-94-6	107	199.99	<1		http://selleckchem.com/products/conivaptan-hcl-vaprisol.html	C32H27ClN4O2	HCl	N/A	Cl.CC1=NC2=C([NH]1)C3=C(C=CC=C3)N(CC2)C(=O)C4=CC=C(NC(=O)C5=C(C=CC=C5)C6=CC=CC=C6)C=C4	5.68	3	2	4
S2118	Ibutilide Fumarate	2	a14	in 10mM DMSO	FDA,DMF,CFDA,NDC	USP42-NF37;Martindale:The Extra Pharmacopoeia	090240,090643,090924	Cardiovascular Disease	Sodium Channel	Transmembrane Transporters	Ibutilide Fumarate is a Class III antiarrhythmic agent that is indicated for acute cardioconversion of atrial fibrillation and atrial flutter of a recent onset to sinus rhythm by induction of slow inward sodium current, which prolongs action potential and refractory period of myocardial cells.	885.23	122647-32-9	89	100.54	89	100.54	http://selleckchem.com/products/ibutilide-fumarate.html	C44H76N4O10S2	Fumarate	U-70226E	CCCCCCCN(CC)CCCC(O)C1=CC=C(N[S](C)(=O)=O)C=C1.CCCCCCCN(CC)CCCC(O)C2=CC=C(N[S](C)(=O)=O)C=C2.OC(=O)\C=C\C(O)=O	1.954	6	4	30
S2119	Probucol	2	c14	in 10mM DMSO	FDA,DMF,CFDA	USP42-NF37;JP17;Martindale:The Extra Pharmacopoeia;CP2005	017535	Cardiovascular Disease	LDL	Metabolism	Probucol is an anti-hyperlipidemic drug by lowering the level of cholesterol in the bloodstream by increasing the rate of LDL catabolism.	516.84	23288-49-5	103	199.29	<1		http://selleckchem.com/products/probucol.html	C31H48O2S2	free base	DH-581	CC(C)(C)C1=CC(=CC(=C1O)C(C)(C)C)SC(C)(C)SC2=CC(=C(O)C(=C2)C(C)(C)C)C(C)(C)C	9.779	0	2	8
S2120	Arbidol HCl	2	e14	in 10mM DMSO	CFDA	N/A	N/A	Infection	Anti-infection	Microbiology	Arbidol HCl is a broad-spectrum antiviral compound that blocks viral fusion, used in treatment of influenza and other respiratory viral infections.	513.88	131707-23-8	103	200.44	<1		http://selleckchem.com/products/Arbidol-hcl.html	C22H26BrClN2O3S	Hydrochloride	N/A	Cl.CCOC(=O)C1=C(CSC2=CC=CC=C2)[N](C)C3=CC(=C(O)C(=C13)CN(C)C)Br	5.698	2	1	8
S2123	Dextrose	2	g14	in 10mM DMSO	FDA,DMF,CFDA,NDC	USP38-NF33;IP2010	004589	Metabolic Disease		Others	Dextrose, a simple sugar (monosaccharide), is an important carbohydrate in biology.	180.16	50-99-7	36	199.82	36	199.82	http://selleckchem.com/products/Dextrose(D-glucose).html	C6H12O6	free base	D-glucose	OCC(O)C(O)C(O)C(O)C=O	-2.791	1	5	5
S2124	Xylose	2	i14	in 10mM DMSO	FDA,DMF,HMA	USP42-NF37;BP2019;EP9.2;IP2010;Martindale:The Extra Pharmacopoeia	018856	Others	Others	Others	Xylose is a sugar first isolated from wood.	150.13	25990-60-7	30	199.83	30	199.83	http://selleckchem.com/products/Xylose.html	C5H10O5	free base	N/A	OCC(O)C(O)C(O)C=O	-2.28	1	4	4
S2125	Mestranol	2	k14	in 10mM DMSO	FDA,DMF,NDC	USP42-NF37;BP2019;EP9.2;KP Ⅹ;JP17;IP2010;Martindale:The Extra Pharmacopoeia	070758,070759	Endocrinology	Estrogen/progestogen Receptor	Endocrinology & Hormones	Mestranol is the 3-methyl ether of ethinyl estradiol, which is a potent estrogen receptor agonist and used as oral contraceptives.	310.43	72-33-3	15	48.32	<1		http://selleckchem.com/products/Mestranol.html	C21H26O2	free base	N/A	COC1=CC2=C(C=C1)C3CCC4(C)C(CCC4(O)C#C)C3CC2	5.112	1	0	1
S2126	Naftopidil	2	m14	in 10mM DMSO	DMF,CFDA,PMDA	JP17;Martindale:The Extra Pharmacopoeia	N/A	Others	Adrenergic Receptor	Neuronal Signaling	Naftopidil is a selective α1-adrenergic receptor antagonist with Ki of 3.7 nM, 20 nM, and 1.2 nM for α1a, α1b, and α1d, respectively, used for the treatment of benign prostatic hyperplasia.	392.49	57149-07-2	79	201.28	<1		http://selleckchem.com/products/Naftopidil(Flivas).html	C24H28N2O3	Free Base	KT-611	COC1=CC=CC=C1N2CCN(CC2)CC(O)COC3=C4C=CC=CC4=CC=C3	3.962	2	1	7
S2127	S- (+)-Rolipram	2	o14	in 10mM DMSO	DMF	N/A	N/A	Psychotic disorders	PDE	Metabolism	S-(+)-Rolipram inhibits human monocyte cyclic AMP-specific PDE4 with IC50 of 0.75 μM, has anti-inflammatory and anti-depressant activity in the central nervous system, less potent than its R enantiomer.	275.34	85416-73-5	55	199.75	<1		http://selleckchem.com/products/sRolipram.html	C16H21NO3	free base	N/A	COC1=C(OC2CCCC2)C=C(C=C1)C3CNC(=O)C3	2.349	3	1	4
S2128	Bazedoxifene HCl	2	a16	in 10mM DMSO	FDA,DMF,EMA,NDC,PMDA	Martindale:The Extra Pharmacopoeia	022247	Cancer	Estrogen/progestogen Receptor	Endocrinology & Hormones	Bazedoxifene HCl is a novel, non-steroidal, indole-based estrogen receptor modulator (SERM) binding to both ERα and ERβ with IC50 of 23 nM and 89 nM, respectively.	507.06	198480-56-7	101	199.19	<1		http://selleckchem.com/products/bazedoxifene-hcl.html	C30H35ClN2O3	Hydrochloride	TSE-424	Cl.CC1=C([N](CC2=CC=C(OCCN3CCCCCC3)C=C2)C4=CC=C(O)C=C14)C5=CC=C(O)C=C5	7.602	1	2	7
S2130	Atropine sulfate monohydrate	2	c16	in 10mM DMSO	FDA,DMF,CFDA,NDC,PMDA,HMA	USP42-NF37;EP9.3;BP2019;KP Ⅹ;Ph.Int_6th;JP17;Martindale:The Extra Pharmacopoeia;CP2005	071295,020056,206289,209260	Others	AChR	Neuronal Signaling	Atropine sulfate monohydrate is a competitive antagonist for the muscarinic acetylcholine receptor, used to decrease the production of saliva and secretions of the airway prior to surgery.	694.83	5908-99-6	139	200.05	139	200.05	http://selleckchem.com/products/Atropine-sulfate-monohydrate.html	C34H50N2O11S	Sulfate monohydrate	N/A	O.CN1C2CCC1CC(C2)OC(=O)C(CO)C3=CC=CC=C3.CN4C5CCC4CC(C5)OC(=O)C(CO)C6=CC=CC=C6.O[S](O)(=O)=O	2.628	4	2	10
S2131	Roflumilast	2	e16	in 10mM DMSO	FDA,DMF,EMA,NDC	Martindale:The Extra Pharmacopoeia	208180,208213,208236,208247,208256,208257,208272,208299	Inflammation/Respiratory Disease	PDE	Metabolism	Roflumilast is a selective inhibitor of PDE4 with IC50 of 0.2-4.3 nM in a cell-free assay.	403.21	162401-32-3	81	200.89	<1		http://selleckchem.com/products/Roflumilast(Daxas).html	C17H14Cl2F2N2O3	free base	APTA 2217, B9302-107, BY 217, BYK 20869	FC(F)OC1=CC=C(C=C1OCC2CC2)C(=O)NC3=C(Cl)C=NC=C3Cl	4.402	4	1	7
S2151	Sonidegib (Erismodegib, NVP-LDE225)	2	g16	in 10mM DMSO	FDA,DMF,EMA,NDC	N/A	205266	Cancer	Hedgehog/Smoothened	Stem Cells & Wnt	Sonidegib (Erismodegib, NVP-LDE225) is a Smoothened (Smo) antagonist, inhibiting Hedgehog (Hh) signaling with IC50 of 1.3 nM (mouse) and 2.5 nM (human) in cell-free assays, respectively. Phase 3.	485.5	956697-53-3	97	199.79	<1		http://selleckchem.com/products/LDE225(NVP-LDE225).html	C26H26F3N3O3	free base		CC1CN(CC(C)O1)C2=CC=C(NC(=O)C3=C(C)C(=CC=C3)C4=CC=C(OC(F)(F)F)C=C4)C=N2	6.732	4	1	6
S2154	Dabigatran Etexilate	2	i16	in 10mM DMSO	FDA,DMF,EMA,HMA,NDC,PMDA	Martindale:The Extra Pharmacopoeia	207984,208046,208057	Cardiovascular Disease	Thrombin	Others	Dabigatran Etexilate is the prodrug of dabigatran, a potent, nonpeptidic small molecule that specifically and reversibly inhibits both free and clot-bound thrombin by binding to the active site of the thrombin molecule.	627.73	211915-06-9	126	200.72	<1		http://selleckchem.com/products/BIBR-1048(Dabigatran-etexilate).html	C34H41N7O5	free base	BIBR-1048	CCCCCCOC(=O)N=C(N)C1=CC=C(NCC2=NC3=C(C=CC(=C3)C(=O)N(CCC(=O)OCC)C4=CC=CC=N4)[N]2C)C=C1	5.751	8	2	17
S2159	Tebipenem Pivoxil	2	k16	in 10mM DMSO	marketed in Japan	N/A	N/A	Infection	Anti-infection	Microbiology	Tebipenem pivoxil is an oral carbapenem antibiotic, use to treat otolaryngologic and respiratory infections.	497.63	161715-24-8	99	198.94	<1		http://selleckchem.com/products/Tebipenem-pivoxil(L-084).html	C22H31N3O6S2	free base	L-084, ME1211	CC(O)C1C2C(C)C(=C(N2C1=O)C(=O)OCOC(=O)C(C)(C)C)SC3CN(C3)C4=NCCS4	1.782	6	1	10
S2167	Bazedoxifene Acetate	2	m16	in 10mM DMSO	FDA,DMF,PMDA	Martindale:The Extra Pharmacopoeia	022247	Cancer	Estrogen/progestogen Receptor	Endocrinology & Hormones	Bazedoxifene Acetate is a third generation selective estrogen receptor modulator (SERM).	530.65	198481-33-3	100	188.45	<1		http://selleckchem.com/products/Bazedoxifene-acetate.html	C32H38N2O5	Acetate	WAY-140424, TSE-424	CC(O)=O.CC1=C([N](CC2=CC=C(OCCN3CCCCCC3)C=C2)C4=CC=C(O)C=C14)C5=CC=C(O)C=C5	3.981	2	2	7
S2169	Rosuvastatin Calcium	2	o16	in 10mM DMSO	FDA,DMF,CFDA,NDC,PMDA,HMA	USP42-NF37;BP2019;EP9.2;IP2010;Martindale:The Extra Pharmacopoeia	079145,079161,079166,079167,079168,079169,079170,079171,079172,201619,205587,206381,206434,206465,206513,207062,207375,207408,207453,207616,207626,207752,208850,208898	Cardiovascular Disease	HMG-CoA Reductase	Metabolism	Rosuvastatin Calcium is a competitive inhibitor of HMG-CoA reductase with IC50 of 11 nM in a cell-free assay.	500.57	147098-20-2	100	199.77	<1		http://selleckchem.com/products/Rosuvastatin-calcium(Crestor).html	C44H54CaF2N6O12S2	Calcium salt	ZD4522	[Ca++].CC(C)C1=C(\C=C\C(O)CC(O)CC([O-])=O)C(=NC(=N1)N(C)[S](C)(=O)=O)C2=CC=C(F)C=C2.CC(C)C3=C(\C=C\C(O)CC(O)CC([O-])=O)C(=NC(=N3)N(C)[S](C)(=O)=O)C4=CC=C(F)C=C4	1.906	8	4	20
S2173	Telotristat Etiprate (LX 1606 Hippurate)	2	a18	in 10mM DMSO	FDA	N/A	208794	Gastroenterology	Hydroxylase	Metabolism	Telotristat Etiprate (LX 1606 Hippurate) is an orally bioavailable, tryptophan hydroxylase (TPH) inhibitor with potential antiserotonergic activity. Phase 3.	754.15	1137608-69-5	100	132.6	<1		http://selleckchem.com/products/telotristat-etiprate-lx-1606-hippurate.html	C36H35ClF3N7O6	Hippuric acid	N/A	CCOC(=O)C(N)CC1=CC=C(C=C1)C2=CC(=NC(=N2)N)OC(C3=CC=C(Cl)C=C3[N]4C=CC(=N4)C)C(F)(F)F.OC(=O)CNC(=O)C5=CC=CC=C5	3.747	8	3	14
S2177	Dichlorphenamide (Diclofenamide)	2	c18	in 10mM DMSO	FDA,DMF,NDC	USP42-NF37	011366,011366	Ophthalmology	Others		Dichlorphenamide is a sulfonamide and a carbonic anhydrase inhibitor of the meta-Disulfamoylbenzene class.	305.16	120-97-8	61	199.89			http://www.selleckchem.com/products/Dichlorphenamide(Diclofenamide).html		Free Base	Diclofenamide	N[S](=O)(=O)C1=CC(=C(Cl)C(=C1)[S](N)(=O)=O)Cl
S2180	Ixazomib (MLN2238)	2	e18	in 10mM DMSO	FDA,DMF,EMA,NDC,PMDA	N/A	208462	Cancer	Proteasome	Proteases	MLN2238 inhibits the chymotrypsin-like proteolytic (β5) site of the 20S proteasome with IC50 and Ki of 3.4 nM and 0.93 nM in cell-free assays, respectively, also inhibits the caspase-like (β1) and trypsin-like (β2) proteolytic sites, with IC50 of 31 and 3500 nM. Phase 3.	361.03	1072833-77-2	72	199.43	<1		http://selleckchem.com/products/MLN-2238.html	C14H19BCl2N2O4	Free Base	N/A	CC(C)CC(NC(=O)CNC(=O)C1=C(Cl)C=CC(=C1)Cl)B(O)O	3.344	2	2	7
S2181	Ixazomib Citrate (MLN9708)	2	g18	in 10mM DMSO	FDA,DMF,EMA,NDC,PMDA	N/A	208462	Cancer	Proteasome	Proteases	Ixazomib Citrate (MLN9708) immediately hydrolyzed to MLN2238, the biologically active form, on exposure to aqueous solutions or plasma. MLN2238 inhibits the chymotrypsin-like proteolytic (β5) site of the 20S proteasome with IC50/Ki of 3.4 nM/0.93 nM in cell-free assays, less potent to β1 and little activity to β2. Phase 3.	517.12	1201902-80-8	100	193.38	<1		http://selleckchem.com/products/MLN9708.html	C20H23BCl2N2O9	free base	N/A	CC(C)CC(NC(=O)CNC(=O)C1=C(Cl)C=CC(=C1)Cl)B2OC(=O)CC(CC(O)=O)(O2)C(O)=O	3.497	7	2	10
S2188	Phenprocoumon	2	i18	in 10mM DMSO	FDA,HMA	Martindale the Extra Pharmacopoei	11228	Hematology	5-alpha Reductase	Angiogenesis	Phenprocoumon(Marcumar) is a vitamin K reductase with an IC50 of 1 μM	280.32	435-97-2,53621-47-9 (sodium salt)	56	199.77	<1		http://www.selleck.cn/products/Phenprocoumon(Marcumar).html	C18H16O3	free base	Marcoumar, Marcumar and Falithrom	CCC(C1=CC=CC=C1)C2=C(O)C3=CC=CC=C3OC2=O	4.004	2	1	3
S2199	Aliskiren Hemifumarate	2	k18	in 10mM DMSO	FDA,DMF,NDC	N/A	206665	Cardiovascular Disease	RAAS	Endocrinology & Hormones	Aliskiren hemifumarate is a direct renin inhibitor with IC50 of 1.5 nM.	609.83	173334-58-2	100	163.98	100	163.98	http://selleckchem.com/products/Aliskiren-hemifumarate.html	C64H110N6O16	fumarate salt	N/A	COCCCOC1=C(OC)C=CC(=C1)CC(CC(N)C(O)CC(C(C)C)C(=O)NCC(C)(C)C(N)=O)C(C)C.COCCCOC2=C(OC)C=CC(=C2)CC(CC(N)C(O)CC(C(C)C)C(=O)NCC(C)(C)C(N)=O)C(C)C.OC(=O)\C=C\C(O)=O	1.735	12	8	40
S2208	Formestane	2	m18	in 10mM DMSO	CFDA	Martindale:The Extra Pharmacopoeia	N/A	Cancer	Aromatase	Endocrinology & Hormones	Formestane is a second generation selective aromatase inhibitor with an IC50 of 80 nM.	302.41	566-48-3	61	201.71	<1		http://selleckchem.com/products/Formestane.html	C19H26O3	free base	CGP-32349, NSC 282175	CC12CCC3C(CCC4=C(O)C(=O)CCC34C)C1CCC2=O	3.036	2	1	0
S2217	Irinotecan HCl Trihydrate	2	o18	in 10mM DMSO	FDA,DMF,EMA,HMA,CFDA,NDC,PMDA	USP42-NF37;EP9.3;BP2018;IP2010;Martindale:The Extra Pharmacopoeia	077219,077260,077776,077915,077994,078122,078188,078589,078753,078796,078805,078953,079068,090016,090101,090137,090393,090675,090726,091032,200771,203054,203380,206935,208718	Cancer	Topoisomerase	DNA Damage	Irinotecan prevents DNA from unwinding by inhibition of topoisomerase 1.	677.18	136572-09-3	100	147.67	1	1.48	http://selleckchem.com/products/Irinotecan-Hcl-Trihydrate-Campto.html	C33H45ClN4O9	HCl & trihydrat	CPT-11 HCl Trihydrate	O.O.O.Cl.CCC1=C2CN3C(=O)C4=C(C=C3C2=NC5=CC=C(OC(=O)N6CCC(CC6)N7CCCCC7)C=C15)C(O)(CC)C(=O)OC4	3.446	6	0	5
S2226	Idelalisib (CAL-101, GS-1101)	2	a20	in 10mM DMSO	FDA,DMF,EMA,NDC	N/A	205858，206545	Cancer/Hematology	PI3K	PI3K/Akt/mTOR	Idelalisib (CAL-101, GS-1101) is a selective p110δ inhibitor with IC50 of 2.5 nM in cell-free assays shown to have 40- to 300-fold greater selectivity for p110δ than p110α/β/γ, and 400- to 4000-fold more selectivity to p110δ than C2β, hVPS34, DNA-PK and mTOR.	415.42	870281-82-6	83	199.8	<1		http://selleckchem.com/products/CAL-101.html	C22H18FN7O	free base	N/A	CCC(NC1=C2N=C[NH]C2=NC=N1)C3=NC4=CC=CC(=C4C(=O)N3C5=CC=CC=C5)F	3.624	5	2	5
S2229	Eltrombopag Olamine	2	c20	in 10mM DMSO	FDA,DMF,NDC,PMDA	Martindale:The Extra Pharmacopoeia	022291，207027	Immunology	Thrombin	Others	Eltrombopag Olamine is a member of the biarylhydrazone class, which is a nonpeptide agonist of the thrombopoietin receptor (TpoR).	564.63	496775-62-3	89	157.63	<1		http://selleckchem.com/products/Eltrombopag-SB-497115-GR.html	C29H36N6O6	diolamine	SB-497115-GR, SB497115	CC1=CC=C(C=C1C)N2N=C(C)C(=N/NC3=CC=CC(=C3O)C4=CC(=CC=C4)C(O)=O)/C2=O.NCCO.NCCO	-0.151	4	6	7
S2233	Esomeprazole sodium	2	e20	in 10mM DMSO	FDA,DMF,CFDA,NDC,HMA	EP9.7;Martindale:The Extra Pharmacopoeia	200882,202686,204657,205379,207181	Gastrointestinal Disease	ATPase	Transmembrane Transporters	Esomeprazole Sodium is a sodium salt of esomeprazole that is a potent proton pump inhibitor with an IC50 of 0.076 mg/kg.	367.4	161796-78-7	73	198.69	73	198.69	http://selleckchem.com/products/esomeprazole-sodium.html	C17H18N3NaO3S	Sodium salt	N/A	COC1=CC=C2[N]([Na])C(=NC2=C1)[S](=O)CC3=NC=C(C)C(=C3C)OC	3.008	5	0	5
S2240	Fesoterodine Fumarate	2	g20	in 10mM DMSO	FDA,DMF,NDC,PMDA	Martindale:The Extra Pharmacopoeia	204504,204827,204844,204868,204893,204946,204973,204975,204983,205002,205007,205012,205032,209783	Others	AChR	Neuronal Signaling	Fesoterodine Fumarate is a prodrug of 5-hydroxymethyl tolterodine that is a muscarinic AChR receptor antagonist, used to treat overactive bladder syndrome.	527.65	286930-03-8	100	189.52	100	189.52	http://selleckchem.com/products/Fesoterodine-fumarate-Toviaz.html	C30H41NO7	Fumarate	SPM 907	CC(C)N(CCC(C1=CC=CC=C1)C2=CC(=CC=C2OC(=O)C(C)C)CO)C(C)C.OC(=O)/C=C/C(O)=O	2.714	4	1	13
S2246	Abiraterone Acetate	2	i20	in 10mM DMSO	FDA,DMF,NDC,PMDA	USP42-NF37	2.08327e+47	Cancer	P450 (e.g. CYP17)	Metabolism	Abiraterone Acetate is an acetate salt form of Abiraterone which is a steroidal cytochrome <b>CYP17</b> inhibitor with <b>IC50</b> of 72 nM in a cell-free assay.	391.55	154229-18-2	20	51.08	<1		http://www.selleck.cn/products/Abiraterone-Acetate-CB7630.html	C26H33NO2	Acetate	CB7630	CC(=O)OC1CCC2(C)C3CCC4(C)C(CC=C4C5=CC=CN=C5)C3CC=C2C1	4.602	3	0	3
S2250	(-)-Epigallocatechin Gallate	2	k20	in 10mM DMSO	DMF	N/A	N/A	Cardiovascular Disease/Endocrinology/Metabolic Disease	DNA Methyltransferase,HER2,Telomerase,EGFR,Fatty Acid Synthase	DNA Damage	(-)-Epigallocatechin Gallate(EGCG) is the main catechin extraction of green tea that inhibits telomerase and DNA methyltransferase. EGCG blocks the activation of EGF receptors and HER-2 receptors. ECGG inhibits fatty acid synthase and glutamate dehydrogenase activity.	458.37	989-51-5	72	157.08	23	50.18	http://selleckchem.com/products/(-)-Epigallocatechin-gallate.html	C22H18O11	free base	EGCG	OC1=CC2=C(CC(OC(=O)C3=CC(=C(O)C(=C3)O)O)C(O2)C4=CC(=C(O)C(=C4)O)O)C(=C1)O	3.097	3	8	4
S2256	4-Methylumbelliferone (4-MU)	2	m20	in 10mM DMSO	CFDA	BP2019;KP Ⅹ;EP9.2;JP17;Martindale:The Extra Pharmacopoeia	N/A	Cancer	Others	Others	4-Methylumbelliferone is a hyaluronic acid (HA) synthesis inhibitor with an IC50 of 0.4 mM.	176.17	90-33-5	35	198.67	<1		http://selleckchem.com/products/4-Methylumbelliferone(4-MU).html	C10H8O3	free base	N/A	CC1=CC(=O)OC2=C1C=CC(=C2)O	2.104	2	1	0
S2258	Esculin	2	o20	in 10mM DMSO	N/A	BP2019;EP9.2	N/A	Angiology	Others	Others	Esculin is a glucoside found in horse chestnuts.	340.28	531-75-9	68	199.84	2	5.88	http://selleckchem.com/products/Aesculin(Esculin).html	C15H16O9	free base	Aesculin	OCC1OC(OC2=C(O)C=C3OC(=O)C=CC3=C2)C(O)C(O)C1O	-0.514	4	5	3
S2260	Amygdalin	2	a22	in 10mM DMSO	NDC	Martindale:The Extra Pharmacopoeia	N/A	Others	Others	Others	Amygdalin is a glycoside initially isolated from the seeds of the tree Prunus dulcis, also known as bitter almonds.	457.43	29883-15-6	91	198.94	<1		http://selleckchem.com/products/Amygdalin.html	C20H27NO11	free base		OCC1OC(OCC2OC(OC(C#N)C3=CC=CC=C3)C(O)C(O)C2O)C(O)C(O)C1O	-2.403	4	7	7
S2261	Andrographolide	2	c22	in 10mM DMSO	CFDA	BP2019;EP9.2	N/A	Inflammation/Gastrointestinal Disease	NF-κB	NF-κB	Andrographolide is a labdane diterpenoid that is the main bioactive component of the medicinal plant Andrographis paniculata.	350.45	5508-58-7	70	199.74	<1		http://selleckchem.com/products/Andrographolide.html	C20H30O5	free base	N/A	CC1(CO)C(O)CCC2(C)C(C\C=C\3C(O)COC3=O)C(=C)CCC12	2.056	2	3	3
S2262	Apigenin	2	e22	in 10mM DMSO	N/A	EP9.2;BP2017	N/A	Cancer/Cardiovascular Disease/Infection	P450 (e.g. CYP17)	Metabolism	Apigenin is a potent P450 inhibitor for CYP2C9 with Ki of 2 μM.	270.24	520-36-5	54	199.82	<1		http://selleckchem.com/products/Apigenin.html	C15H10O5	free base	NSC 83244, LY 080400	OC1=CC=C(C=C1)C2=CC(=O)C3=C(O2)C=C(O)C=C3O	2.41	2	3	1
S2263	Arbutin	2	g22	in 10mM DMSO	NDC	BP2019;EP9.2;Martindale:The Extra Pharmacopoeia	N/A	Others	Tyrosinase	Proteases	Arbutin is a tyrosinase inhibitor with an IC50 of 1.09 mM.	272.25	497-76-7	55	202.02	55	202.02	http://selleckchem.com/products/Arbutin(Uva,-p-Arbutin).html	C12H16O7	free base	Uva,p-Arbutin	OCC1OC(OC2=CC=C(O)C=C2)C(O)C(O)C1O	-0.584	2	5	3
S2264	Artemether	2	i22	in 10mM DMSO	FDA,DMF,CFDA,NDC,HMA	Ph.Int_6th;Martindale:The Extra Pharmacopoeia	022268	Infection/Parasitology	Anti-infection	Microbiology	Artemether is an antimalarial for the treatment of resistant strains of falciparum malaria.	298.37	71963-77-4	60	201.09	<1		http://selleckchem.com/products/Artemether(SM-224).html	C16H26O5	free base	SM-224, CGP 56696	COC1OC2OC3(C)CCC4C(C)CCC(C1C)C24OO3	2.029	5	0	1
S2265	Artesunate	2	k22	in 10mM DMSO	DMF,CFDA	Ph.Int_6th;IP2010;Martindale:The Extra Pharmacopoeia	N/A	Infection/Parasitology	STAT	JAK/STAT	Artesunate is a part of the artemisinin group of agents with an IC50 of < 5 μM for small cell lung carcinoma cell line H69. It is a potential inhibitor of STAT-3 and exhibits selective cytotoxicity of cancer cells over normal cells in vitro A potent inhibitor of EXP1.	384.42	88495-63-0	77	200.3	<1		http://selleckchem.com/products/Artesunate.html	C19H28O8	free base	WR-256283	CC1CCC2C(C)C(OC3OC4(C)CCC1C23OO4)OC(=O)CCC(O)=O	1.845	7	0	5
S2266	Asiatic Acid	2	m22	in 10mM DMSO	NDC	N/A	N/A	Cancer/Inflammation	p38 MAPK	MAPK	Asiatic acid is the aglycone of asiaticoside isolated from the plant Centella asiatica, commonly used in wound healing.	488.7	464-92-6	97	198.49	<1		http://selleckchem.com/products/Asiatic-acid.html	C30H48O5	free base	Dammarolic acid, Asiantic acid	CC1CCC2(CCC3(C)C(=CCC4C5(C)CC(O)C(O)C(C)(CO)C5CCC34C)C2C1C)C(O)=O	4.435	1	3	2
S2268	Baicalein	2	o22	in 10mM DMSO	CFDA	N/A	N/A	Cardiovascular Disease	P450 (e.g. CYP17)	Metabolism	Baicalein is a CYP2C9 and prolyl endopeptidase inhibitor.	270.24	491-67-8	54	199.82	<1		http://selleckchem.com/products/Baicalein.html	C15H10O5	free base	N/A	OC1=C(O)C(=C2C(=O)C=C(OC2=C1)C3=CC=CC=C3)O	2.41	2	3	1
S2269	Baicalin	2	b4	in 10mM DMSO	CFDA	BP2019;EP9.2	N/A	Infection/Inflammation	GABA Receptor	Neuronal Signaling	Baicalin is a known prolyl endopeptidase inhibitor and affects the GABA receptors.	446.36	21967-41-9	89	199.39	<1		http://selleckchem.com/products/Baicalin.html	C21H18O11	free base	N/A	OC1C(O)C(OC(C1O)C(O)=O)OC2=C(O)C(=C3C(=O)C=C(OC3=C2)C4=CC=CC=C4)O	0.608	5	5	4
S2270	Bergenin	2	d4	in 10mM DMSO	CFDA	N/A	N/A	Inflammation/Respiratory Disease	Others	Others	Bergenin is trihydroxybenzoic acid glycoside and the C-glycoside of 4-O-methyl gallic acid.	328.27	477-90-7	66	201.05	<1		http://selleckchem.com/products/Bergenin-(Cuscutin).html	C14H16O9	free base	Cuscutin	COC1=C(O)C2=C(C=C1O)C(=O)OC3C(O)C(O)C(CO)OC23	-0.849	4	5	2
S2271	Berberine chloride	2	f4	in 10mM DMSO	PMDA	BP2019;EP9.2;KP Ⅹ;JP17;Martindale:The Extra Pharmacopoeia	N/A	Infection/Parasitology	Anti-infection	Microbiology	Berberine chloride is a quaternary ammonium salt from the group of isoquinoline alkaloids.	371.81	633-65-8	40	107.58	<1		http://selleckchem.com/products/Berberine-Hydrochloride.html	C20H18ClNO4	chloride	N/A	[Cl-].COC1=CC=C2C=C3C4=C(CC[N+]3=CC2=C1OC)C=C5OCOC5=C4	1.289	4	0	2
S2277	Caffeic Acid	2	h4	in 10mM DMSO	CFDA,NDC	BP2019;EP9.2;CP2005	N/A	Hematology	Others	Others	Caffeic acid is a hydroxycinnamic acid, a naturally occurring organic compound.	180.16	331-39-5	36	199.82	<1		http://selleckchem.com/products/Caffeic-acid.html	C9H8O4	free base	N/A	OC(=O)/C=C/C1=CC=C(O)C(=C1)O	1.443	1	2	2
S2280	Chlorogenic Acid	2	j4	in 10mM DMSO	N/A	USP42-NF37 ;BP2019;EP9.2	N/A	Cancer	Others	Others	Chlorogenic acid is a hydroxycinnamic acid and a member of a family of naturally occurring organic compounds.	354.31	327-97-9	71	200.39	18	50.8	http://selleckchem.com/products/Chlorogenic-acid.html	C16H18O9	free base	NSC 407296, Heriguard	OC1CC(O)(CC(OC(=O)\C=C\C2=CC(=C(O)C=C2)O)C1O)C(O)=O	-0.34	3	4	5
S2282	Cinchonidine	2	l4	in 10mM DMSO	N/A	USP42-NF37;BP2019;EP9.2	N/A	Others	Anti-infection	Microbiology	Cinchonidine is an alkaloid used in asymmetric synthesis in organic chemistry.	294.39	485-71-2	59	200.41	<1		http://selleckchem.com/products/Cinchonidine.html	C19H22N2O	free base	N/A	OC(C1CC2CCN1CC2C=C)C3=CC=NC4=CC=CC=C34	2.75	1	1	3
S2283	Cinchonine(LA40221)	2	n4	in 10mM DMSO	N/A	USP42-NF37;BP2019;EP9.2	N/A	Cancer	Others	Angiogenesis	Cinchonine is an alkaloid and a stereoisomer and pseudo-enantiomer of cinchonidine.	294.4	118-10-5	9	30.57			http://selleckchem.com/products/cinchonine.html	C19H22N2O	free base	N/A	OC(C1CC2CCN1CC2C=C)C3=CC=NC4=CC=CC=C34	2.75	1	1	3
S2284	Colchicine	2	p4	in 10mM DMSO	FDA,DMF,CFDA,NDC,PMDA,HMA	USP42-NF37;BP2019;EP9.4;KP Ⅹ;Ph.Int_6th;JP17;IP2010;Martindale:The Extra Pharmacopoeia	203976,204461,204711,208678,211250,211519	Metabolic Disease	Microtubule Associated	Cell Cycle	Colchicine is a microtubule polymerization inhibitor with an IC50 of 3 nM.	399.44	64-86-8	80	200.28	80	200.28	http://selleckchem.com/products/colchicine.html	C22H25NO6	free base	Colchineos, Colchisol, Colcin	COC1=CC=C2C(=CC1=O)C(CCC3=C2C(=C(OC)C(=C3)OC)OC)NC(C)=O	2.044	6	1	5
S2286	Cyclosporin A	2	b6	in 10mM DMSO	FDA, EMA, HMA, CFDA, NDC, PMDA	Martindale the Extra Pharmacopoei, EP10.2, USP43-NF38, Ph.Int_6th, JP17	210913	Immunology	Immunology & Inflammation related	Immunology & Inflammation	Cyclosporin A is an immunosuppressive agent, binds to the cyclophilin and then inhibits calcineurin with IC50 of 7 nM in a cell-free assay, widely used in organ transplantation to prevent rejection.	1202.61	59865-13-3	100	83.15	<1		http://selleckchem.com/products/Cyclosporin-A(Cyclosporine-A).html	C62H111N11O12	free base	Cyclosporine A	CCC1NC(=O)C(C(O)C(C)C\C=C\C)N(C)C(=O)C(C(C)C)N(C)C(=O)C(CC(C)C)N(C)C(=O)C(CC(C)C)N(C)C(=O)C(C)NC(=O)C(C)NC(=O)C(CC(C)C)N(C)C(=O)C(NC(=O)C(CC(C)C)N(C)C(=O)CN(C)C1=O)C(C)C	4.333	11	5	15
S2287	Cytisine	2	d6	in 10mM DMSO	NDC,HMA	Martindale:The Extra Pharmacopoeia	N/A	Psychotic disorders	AChR	Neuronal Signaling	Cytisine is a nicotinic acetylcholine receptor agonist.	190.24	485-35-8	38	199.75	38	199.75	http://selleckchem.com/products/Cytisine(Baphitoxine,-Sophorine).html	C11H14N2O	free base	Baphitoxine,Sophorine	O=C1C=CC=C2C3CNCC(C3)CN12	-0.338	1	1	0
S2289	Daidzin	2	f6	in 10mM DMSO	CFDA	BP2019;EP9.2	N/A	Cancer/Cardiovascular Disease/Endocrinology	Dehydrogenase	Metabolism	Daidzin, a natural organic compound in the class of phytochemicals known as isoflavones, is a potent and selective inhibitor of human mitochondrial aldehyde dehydrogenase and inhibits ALDH-I selectively (Ki=20 nM) at least 500 times less effective against ALDH-Ⅱ, the cytosolic isozyme (Ki=10 μM).	416.38	552-66-9	83	199.34	<1		http://selleckchem.com/products/Daidzin.html	C21H20O9	Free Base	Daidzoside, Daidzein 7-O-glucoside, Daidzein 7-glucoside, Daidzein-7-glucoside	OCC1OC(OC2=CC3=C(C=C2)C(=O)C(=CO3)C4=CC=C(O)C=C4)C(O)C(O)C1O	0.452	4	5	4
S2290	Dihydroartemisinin (DHA)	2	h6	in 10mM DMSO	CFDA	N/A	N/A	Infection	Others	Others	Dihydroartemisinin (DHA) is a semi-synthetic derivative of artemisinin and isolated from the traditional Chinese herb Artemisia annua.	284.35	71939-50-9	56	196.94	<1		http://selleckchem.com/products/Dihydroartemisinin(DHA).html	C15H24O5	free base	N/A	CC1CCC2C(C)C(O)OC3OC4(C)CCC1C23OO4	1.621	4	0	0
S2293	DL-Carnitine HCl	2	j6	in 10mM DMSO	DMF	N/A	N/A	Gastroenterology	Others	Others	DL-Carnitine HCl is a quaternary ammonium compound biosynthesized from the amino acids lysine and methionine.	197.66	461-05-2	40	202.37	40	202.37	http://selleckchem.com/products/DL-Carnitine-hydrochloride.html	C7H16ClNO3	Hydrochloride	N/A	[Cl-].C[N+](C)(C)CC(O)CC(O)=O	-4.49	1	1	4
S2295	Emodin	2	l6	in 10mM DMSO	N/A	BP2018;EP9.2	N/A	Others	Dehydrogenase	Metabolism	Emodin is a purgative resin, 6-methyl-1,3,8-trihydroxyanthraquinone, from rhubarb, the buckthorn and Japanese Knotweed (Fallopia japonica).	270.24	518-82-1	54	199.82	<1		http://selleckchem.com/products/Emodin.html	C15H10O5	free base	N/A	CC1=CC2=C(C(=C1)O)C(=O)C3=C(C=C(O)C=C3O)C2=O	2.568	2	3	0
S2296	Enoxolone	2	n6	in 10mM DMSO	CFDA	BP2019;EP9.2;IP2010;Martindale:The Extra Pharmacopoeia	N/A	Endocrinology	Dehydrogenase	Metabolism	Enoxolone is a pentacyclic triterpenoid derivative of the beta-amyrin type obtained from the hydrolysis of glycyrrhizic acid, which was obtained from the herb liquorice.	470.68	471-53-4	94	199.71	<1		http://selleckchem.com/products/Enoxolone(Glycyrrhetin).html	C30H46O4	free base	Glycyrrhetin	CC1(C)C(O)CCC2(C)C1CCC3(C)C2C(=O)C=C4C5CC(C)(CCC5(C)CCC34C)C(O)=O	5.656	2	1	1
S2299	Formononetin	2	p6	in 10mM DMSO	N/A	BP2019	N/A	Endocrinology	Others	Others	Formononetin is a phytoestrogen from the root of Astragalus membranaceus and an O-methylated isoflavone.	268.26	485-72-3	54	201.3	<1		http://selleckchem.com/products/Formononetin(Formononetol).html	C16H12O4	free base	Formononetol, Biochanin B	COC1=CC=C(C=C1)C2=COC3=C(C=CC(=C3)O)C2=O	2.608	3	1	2
S2300	Ferulic Acid	2	b8	in 10mM DMSO	N/A	USP42-NF37;BP2019;EP9.1	N/A	Cardiovascular Disease	Others	Others	Ferulic Acid is a hydroxycinnamic acid and a type of organic compound found in the Ferula assafoetida L. or Ligusticum chuanxiong.	194.19	1135-24-6	39	200.83	<1		http://selleckchem.com/products/Fumalic-acid(Ferulic-acid).html	C10H10O4	free base	Fumalic Acid	COC1=CC(=CC=C1O)\C=C\C(O)=O	1.669	2	1	3
S2302	Glycyrrhizin (Glycyrrhizic Acid)	2	d8	in 10mM DMSO	CFDA	N/A	N/A	Cancer	Dehydrogenase,MAO,High-mobility Group	Metabolism	Glycyrrhizin (Glycyrrhizic Acid) is a direct HMGB1(high mobility group box 1) inhibitor that inhibits HMGB1-dependent inflammatory molecule expression and oxidative stress modulates P38 and P-JNK but not p-ERK signalling Also inhibits 11 beta-hydroxysteroid dehydrogenase and monoamine oxidase (MAO).	822.93	1405-86-3	100	121.52	<1		http://selleckchem.com/products/Glycyrrhizic-acid.html	C42H62O16	free base	N/A	CC1(C)C(CCC2(C)C1CCC3(C)C2C(=O)C=C4C5CC(C)(CCC5(C)CCC34C)C(O)=O)OC6OC(C(O)C(O)C6OC7OC(C(O)C(O)C7O)C(O)=O)C(O)=O	2.417	8	5	7
S2303	gossypol-Acetic acid	2	f8	in 10mM DMSO	CFDA	N/A	N/A	Cancer	Dehydrogenase	Metabolism	Gossypol Acetate is a polyphenolic aldehyde that permeates cells and acts as an inhibitor for several dehydrogenase enzymes such as lactate dehydrogenase, NAD-linked enzymes.	578.61	12542-36-8	100	172.83	<1		http://selleckchem.com/products/Gossypol.html	C32H34O10	Acetate	Pogosin, AT101	CC(C)C1=C2C=C(C)C(=C(O)C2=C(C=O)C(=C1O)O)C3=C(O)C4=C(C=C3C)C(=C(O)C(=C4C=O)O)C(C)C.CC(O)=O	6.388	3	6	5
S2304	Gramine	2	h8	in 10mM DMSO	N/A	BP2019;EP9.2	N/A	Others	Others	Others	Gramine is a naturally occurring indole alkaloid present in several plant species.	174.24	87-52-5	35	200.87	<1		http://selleckchem.com/products/Gramine.html	C11H14N2	free base	N/A	CN(C)CC1=C[NH]C2=C1C=CC=C2	2.197	0	1	2
S2308	Hesperetin	2	j8	in 10mM DMSO	CFDA	EP10.4, USP43-NF38	N/A	Cardiovascular Disease	TGF-beta/Smad,Histamine Receptor	TGF-beta/Smad	Hesperetin is a bioflavonoid and, to be more specific, a flavanone.	302.27	520-33-2	60	198.5	<1		http://selleckchem.com/products/Hesperetin.html	C16H14O6	free base	N/A	COC1=CC=C(C=C1O)C2CC(=O)C3=C(O)C=C(O)C=C3O2	2.357	3	3	2
S2309	Hesperidin	2	l8	in 10mM DMSO	DMF,CFDA,NDC,HMA	USP42-NF37;BP2019;EP9.2;Martindale:The Extra Pharmacopoeia	N/A	Cardiovascular Disease/Infection	Others	Others	Hesperidin is a flavanone glycoside found abundantly in citrus fruits.	610.56	520-26-3	100	163.78	<1		http://selleckchem.com/products/Hesperidin.html	C28H34O15	free base	Cirantin	COC1=CC=C(C=C1O)C2CC(=O)C3=C(O)C=C(OC4OC(COC5OC(C)C(O)C(O)C5O)C(O)C(O)C4O)C=C3O2	-0.431	7	8	7
S2310	Honokiol	2	n8	in 10mM DMSO	N/A	BP2019;EP9.2	N/A	Inflammation/Gastrointestinal Disease	Akt,MEK	PI3K/Akt/mTOR	Honokiol is the active principle of magnolia extract that inhibits Akt-phosphorylation and promotes ERK1/2 phosphorylation. Phase 3.	266.33	35354-74-6	53	199	<1		http://selleckchem.com/products/Honokiol.html	C18H18O2	free base	N/A	OC1=C(CC=C)C=C(C=C1)C2=CC(=CC=C2O)CC=C	4.88	0	2	5
S2311	Hyodeoxycholic acid (HDCA)	2	p8	in 10mM DMSO	CFDA	N/A	N/A	Cardiovascular Disease	Others	Others	Hyodeoxycholic(HDCA) acid is a secondary bile acid, one of the metabolic byproducts of intestinal bacteria.	392.57	83-49-8	78	198.69	<1		http://selleckchem.com/products/Hyodeoxycholic-acid(HDCA).html	C24H40O4	free base	NSC 60672	CC(CCC(O)=O)C1CCC2C3CC(O)C4CC(O)CCC4(C)C3CCC12C	4.014	1	2	4
S2314	Kaempferol	2	b10	in 10mM DMSO	N/A	USP42-NF37;BP2019;EP9.2	N/A	Cancer/Endocrinology/Infection/Inflammation/Metabolic Disease	Fatty Acid Synthase,Estrogen/progestogen Receptor	Endocrinology & Hormones	Kaempferol, a natural flavonol, functions as an ERRα and ERRγ inverse agonist. It inhibits topoisomerase I catalyzed DNA religation and may also inhibit the activity of fatty acid synthase.	286.23	520-18-3	57	199.14	<1		http://selleckchem.com/products/Kaempferol.html	C15H10O6	free base	Robigenin	OC1=CC=C(C=C1)C2=C(O)C(=O)C3=C(O)C=C(O)C=C3O2	1.872	2	4	1
S2316	Kinetin	2	d10	in 10mM DMSO	N/A	Martindale:The Extra Pharmacopoeia	N/A	Others	Others	Others	Kinetin is a type of cytokinin, a class of plant hormone that promotes cell division.	215.21	525-79-1	8	37.17	<1		http://selleckchem.com/products/Kinetin(6-Furfuryladenine).html	C10H9N5O	free base	6-Furfuryladenine	C(NC1=NC=NC2=C1[NH]C=N2)C3=CC=CO3	0.875	4	2	3
S2317	L-(+)-Rhamnose Monohydrate	2	f10	in 10mM DMSO	N/A	BP2019;EP9.2;Martindale:The Extra Pharmacopoeia	N/A	Others	Others	Others	L(+)-Rhamnose (Rham) is a naturally-occurring deoxy sugar that is found primarily in plants and some bacteria.	182.17	10030-85-0	36	197.62	36	197.62	http://selleckchem.com/products/l-positive-rotation-rhamnose-monohydrate.html	C6H14O6	Monohydrate	N/A	O.CC1OC(O)C(O)C(O)C1O	-1.833	1	3	0
S2318	Lappaconitine	2	h10	in 10mM DMSO	CFDA	Martindale:The Extra Pharmacopoeia	N/A	Inflammation/Neurological Disease	Sodium Channel	Transmembrane Transporters	Lappaconitine (LC) is a natural diterpenoid alkaloid (DTA), acting as a human heart sodium channel blocker and possessing a wide range of biological activities, including anti-arrhythmic, anti-inflammatory, antioxidative, anticancer, epileptiform etc.	584.7	32854-75-4	16	27.36			http://selleckchem.com/products/lappaconitine.html	C32H44N2O8	free base	N/A	CCN1CC2(CCC(OC)C34C2CC(C13)C5(O)CC(OC)C6CC4C5(O)C6OC)OC(=O)C7=CC=CC=C7NC(C)=O	0.029	6	1	8
S2320	Luteolin	2	j10	in 10mM DMSO	N/A	BP2019;EP9.2	N/A	Angiology/Cancer/Infection/Inflammation	PDE	Metabolism	Luteolin is a flavonoid found in Terminalia chebula, which is a non-selective phisphodiesterase PDE inhibitor for PDE1-5 with Ki of 15.0 &muM, 6.4 &muM, 13.9 &muM, 11.1 &muM and 9.5 &muM, respectively. Phase 2.	286.24	491-70-3	57	199.13	<1		http://selleckchem.com/products/Luteolin(Luteolol).html	C15H10O6	free base	N/A	OC1=CC(=C2C(=O)C=C(OC2=C1)C3=CC=C(O)C(=C3)O)O	2.168	2	4	1
S2321	Magnolol	2	l10	in 10mM DMSO	N/A	BP2019;EP9.2	N/A	Others	NF-κB	NF-κB	Magnolol is a bioactive lignin found in the bark of the Houpu magnolia (Magnolia officinalis) which shows antifungal properties. It can block TNF-α-induced NF-KB activation.	266.33	528-43-8	53	199	<1		http://selleckchem.com/products/Magnolol(2,2-Bichavicol).html	C18H18O2	free base	NSC 293099	OC1=C(C=C(CC=C)C=C1)C2=CC(=CC=C2O)CC=C	4.88	0	2	5
S2322	(+)-Matrine	2	n10	in 10mM DMSO	CFDA	N/A	N/A	Cancer	Opioid Receptor	Neuronal Signaling	Matrine((+)-Matrine) is an alkaloid found in plants from the Sophora family, which has a variety of pharmacological effects, including anti-cancer effects, and action as a kappa opioid receptor agonist.	248.36	519-02-8	49	197.29	11	44.29	http://selleckchem.com/products/matrine.html	C15H24N2O	free base	N/A	O=C1CCCC2C3CCCN4CCCC(CN12)C34	1.417	1	0	0
S2325	Morin Hydrate	2	p10	in 10mM DMSO	N/A	USP42-NF37	N/A	Cancer/Immunology	Others	Others	Morin hydrate(Aurantica) is a flavonoid isolated from Maclura pomifera (Osage orange), Maclura tinctoria (old fustic) and from leaves of Psidium guajava (common guava).	320.25	6202-27-3	64	199.84	<1		http://selleckchem.com/products/Morin-hydrate(Aurantica).html	C15H12O8	Hydrate	Aurantica	O.OC1=CC=C(C(=C1)O)C2=C(O)C(=O)C3=C(O)C=C(O)C=C3O2	1.423	2	5	1
S2328	Nalidixic acid	2	b12	in 10mM DMSO	FDA,DMF,CFDA,PMDA	USP42-NF37;BP2019;KP Ⅹ;JP17;IP2010;Martindale:The Extra Pharmacopoeia	070270,070271,070272,071919,071936,072061	Infection	Topoisomerase	DNA Damage	Nalidixic acid is a synthetic 1,8-naphthyridine antimicrobial agent with a limited bacteriocidal spectrum. It is an inhibitor of the A subunit of bacterial DNA gyrase.	232.24	389-08-2	6	25.84	<1		http://selleckchem.com/products/Nalidixic-acid(NegGram).html	C12H12N2O3	free base	NSC-82174	CCN1C=C(C(O)=O)C(=O)C2=C1N=C(C)C=C2	1.176	3	0	2
S2329	Naringin	2	d12	in 10mM DMSO	N/A	BP2019;EP9.2;Martindale:The Extra Pharmacopoeia	N/A	Infection/Inflammation/Neurological Disease	P450 (e.g. CYP17)	Metabolism	Naringin is a flavanone glycoside, which exerts a variety of pharmacological effects such as antioxidant activity, blood lipid lowering, anticancer activity, and inhibition of cytochrome P450 enzymes.	580.53	10236-47-2	100	172.26	<1		http://selleckchem.com/products/Naringin(Naringoside).html	C27H32O14	free base	Naringoside	CC1OC(OC2C(O)C(O)C(CO)OC2OC3=CC(=C4C(=O)CC(OC4=C3)C5=CC=C(O)C=C5)O)C(O)C(O)C1O	-0.415	6	8	6
S2331	Neohesperidin Dihydrochalcone (Nhdc)	2	f12	in 10mM DMSO	N/A	EP9.1;BP2017	N/A	Cancer/Cardiovascular Disease/Endocrinology/Metabolic Disease	Others	Others	Neohesperidin dihydrochalcone(Nhdc), sometimes abbreviated to neohesperidin DC or simply NHDC, is an artificial sweetener derived from citrus.	612.58	20702-77-6	100	163.24	<1		http://selleckchem.com/products/Neohesperidin-dihydrochalcone(Nhdc).html	C28H36O15	free base	NCI-c60764	COC1=C(O)C=C(CCC(=O)C2=C(O)C=C(OC3OC(CO)C(O)C(O)C3OC4OC(C)C(O)C(O)C4O)C=C2O)C=C1	-0.048	6	9	10
S2332	Neohesperidin	2	h12	in 10mM DMSO	N/A	EP9.1;BP2017	N/A	Cancer/Cardiovascular Disease/Endocrinology/Metabolic Disease	ROS	Immunology & Inflammation	Neohesperidin, a flavanone glycoside found in citrus fruits, is an antioxidant agent.	610.56	13241-33-3	122	199.82	<1		http://selleckchem.com/products/Neohesperidin.html	C28H34O15	free base	NSC 31048	COC1=CC(=CC(=C1)C2CC(=O)C3=C(O)C=C(OC4OC(CO)C(O)C(O)C4OC5OC(C)C(O)C(O)C5O)C=C3O2)O	-0.431	7	8	7
S2334	Oleanolic Acid	2	j12	in 10mM DMSO	CFDA	BP2019;EP9.2	N/A	Infection	Anti-infection	Microbiology	Oleanolic Acid is a non-toxic, hepatoprotective triterpenoid found in Phytolacca Americana, which exerts antitumor and antiviral properties.	456.7	508-02-1	21	45.98	<1		http://selleckchem.com/products/Oleanolic-Acid(Caryophyllin).html	C30H48O3	free base	Caryophyllin	CC1(C)CC(C2CCC3(C)C(=CCC4C5(C)CCC(O)C(C)(C)C5CCC34C)C2C1)C(O)=O	6.282	1	1	1
S2336	Orotic acid (6-Carboxyuracil)	2	l12	in 10mM DMSO	DMF,NDC	Martindale:The Extra Pharmacopoeia	N/A	Cardiovascular Disease/Endocrinology	Others	Others	Orotic acid(6-Carboxyuracil) is a heterocyclic compound and an acid.	156.1	65-86-1	2	12.81	<1		http://selleckchem.com/products/Orotic-acid(6-Carboxyuracil).html	C5H4N2O4	free base	N/A	OC(=O)C1=CC(=O)NC(=O)N1	-1.152	3	2	1
S2337	Osthole	2	n12	in 10mM DMSO	N/A	BP2019;EP9.2	N/A	Cardiovascular Disease	Others	Others	Osthol is an O-methylated coumarin, which is found in the plants such as Cnidium monnieri, Angelica archangelica and Angelica pubescens.	244.29	484-12-8	49	200.58	<1		http://selleckchem.com/products/Osthole(Osthol).html	C15H16O3	free base	Osthol	COC1=CC=C2C=CC(=O)OC2=C1CC=C(C)C	3.74	3	0	3
S2338	Oxymatrine	2	p12	in 10mM DMSO	CFDA	CP2005	N/A	Infection	Others	Others	Oxymatrine is a quinolizidine alkaloid extracted from the root of Sophora flavescens with anti-inflammatory, antifibrosis, and antitumor effects, inhibits the iNOS expression and TGF-β/Smad pathway. It is used for the treatment of viral hepatitis, cancer, viral myocarditis, gastrointestinal hemorrhage and skin diseases.	264.36	16837-52-8	53	200.48	53	200.48	http://selleckchem.com/products/Oxymatrine(Matrine-N-oxide).html	C15H24N2O2	free base	Matrine N-oxide	[O-][N+]12CCCC3CN4C(CCCC4=O)C(CCC1)C23	0.61	1	0	0
S2339	Paeonol	2	b14	in 10mM DMSO	CFDA	BP2019;EP9.2;CP2005	N/A	Immunology/Inflammation	MAO	Metabolism	Paeonol (Peonol), a phenolic compound extracted from Chinese herbs Paeonia suffruticosa (moutan cortex) and Cynanchum paniculatum, inhibits MAO with an IC50 of about 50 &muM.	166.17	552-41-0	33	198.59	<1		http://selleckchem.com/products/Paeonol(Peonol).html	C9H10O3	free base	Peonol	COC1=CC(=C(C=C1)C(C)=O)O	1.311	2	1	2
S2341	(-)-Parthenolide	2	d14	in 10mM DMSO	N/A	BP2019;EP9.2	N/A	Immunology/Inflammation	HDAC,NF-κB,Mdm2,p53	NF-κB	(-)-Parthenolide, an inhibitor of the Nuclear Factor-κB Pathway, specifically depletes HDAC1 protein without affecting other class I/II HDACs Also promotes the ubiquitination of MDM2 and activates p53 cellular functions.	248.32	20554-84-1	49	197.33	<1		http://selleckchem.com/products/Parthenolide((-)-Parthenolide).html	C15H20O3	free base	N/A	CC/1=C\CCC2(C)OC2C3OC(=O)C(=C)C3CC1	2.923	3	0	0
S2344	Piperine	2	f14	in 10mM DMSO	NDC	BP2019;EP9.2	N/A	Neurological Disease	P450 (e.g. CYP17)	Metabolism	Piperine (1-Piperoylpiperidine) is the alkaloid responsible for the pungency of black pepper and long pepper, which has also been used in some forms of traditional medicine and as an insecticide.	285.34	94-62-2	57	199.76	<1		http://selleckchem.com/products/Piperine(1-Piperoylpiperidine).html	C17H19NO3	free base	1-Piperoylpiperidine	O=C(\C=C\C=C\C1=CC2=C(OCO2)C=C1)N3CCCCC3	2.864	3	0	3
S2346	Puerarin	2	h14	in 10mM DMSO	CFDA	BP2019;EP9.2;CP2005	N/A	Psychotic disorders	5-HT Receptor	Neuronal Signaling	Puerarin (Kakonein), an isoflavones found in the root of Radix puerariae, is a 5-HT2C receptor and benzodiazepine site antagonist.	416.38	3681-99-0	86	206.54	<1		http://selleckchem.com/products/Puerarin(Kakonein).html	C21H20O10	free base	Kakonein	OCC1OC(OC2=C(O)C=CC3=C2OC=C(C3=O)C4=CC=C(O)C=C4)C(O)C(O)C1O	0.21	4	6	4
S2347	Quercetin Dihydrate	2	j14	in 10mM DMSO	N/A	USP42-NF37;BP2019;EP9.2;Martindale:The Extra Pharmacopoeia	N/A	Cancer/Cardiovascular Disease/Endocrinology/Metabolic Disease/Inflammation	Others	Others	Quercetin, a polyphenolic flavonoid found in a wide variety of plant-based foods, such as apples, onions, berries, and red wine, is utilized in many different cultures for their nervous system and anticancer effects.	338.27	6151-25-3	67	198.07	<1		http://selleckchem.com/products/Quercetin-dihydrate(Sophoretin).html	C15H14O9	Dihydrate	Sophoretin	O.O.OC1=CC(=C2C(=O)C(=C(OC2=C1)C3=CC=C(O)C(=C3)O)O)O	1.216	2	5	1
S2348	Rotenone (Barbasco)	2	l14	in 10mM DMSO	N/A	Martindale:The Extra Pharmacopoeia	N/A	Infection/Parasitology	Anti-infection	Microbiology	Rotenone is a botanical insecticide that is an inhibitor of mitochondrial electron transport.	394.42	83-79-4	78	197.76			http://selleckchem.com/products/rotenone-barbasco.html	C23H22O6	free base	Barbasco, Dactinol, Paraderil, Rotenon, Rotocide	COC1=CC2=C(C=C1OC)C3C(CO2)OC4=C(C=CC5=C4CC(O5)C(C)=C)C3=O	3.93	6	0	3
S2349	Rutaecarpine	2	n14	in 10mM DMSO	N/A	EP10.4	N/A	Inflammation	COX	Neuronal Signaling	Rutaecarpine is an indolopyridoquinazolinone alkaloid isolated from Evodia rutaecarpa and related herbs a new class of COX-2 inhibitor.	287.32	84-26-4	24	83.53	<1		http://selleckchem.com/products/Rutaecarpine(Rutecarpine).html	C18H13N3O	free base	Rutecarpine	O=C1N2CCC3=C([NH]C4=C3C=CC=C4)C2=NC5=C1C=CC=C5	3.359	2	1	0
S2350	Rutin	2	p14	in 10mM DMSO	DMF,CFDA,NDC	USP42-NF37;EP8.8;CP2005	N/A	Endocrinology/Hematology	Immunology & Inflammation related	Immunology & Inflammation	Rutin, a flavonol glycoside found in many plants including buckwheat tobacco forsythia hydrangea viola, etc., which possesses healthy effects for human.	610.52	153-18-4	100	163.79	<1		http://selleckchem.com/products/Rutin(Rutoside).html	C27H30O16	free base	Rutoside	CC1OC(OCC2OC(OC3=C(OC4=C(C(=CC(=C4)O)O)C3=O)C5=CC(=C(O)C=C5)O)C(O)C(O)C2O)C(O)C(O)C1O	-1.158	6	10	6
S2351	Salicin	2	b16	in 10mM DMSO	N/A	BP2019;EP9.2	N/A	Inflammation	COX	Neuronal Signaling	Salicin is a phenol β-glycosid produced from willow bark that shows anti-inflammatory effects. It is a natural, non-selective COX-1 and COX-2 inhibitor.	286.28	138-52-3	57	199.11	24	83.83	http://selleckchem.com/products/Salicin(Salicoside,-Salicine).html	C13H18O7	free base	Salicoside,Salicine	OCC1OC(OC2=CC=CC=C2CO)C(O)C(O)C1O	-0.947	2	5	4
S2354	Sclareol	2	d16	in 10mM DMSO	N/A	BP2019;EP9.2	N/A	Cancer/Hematology	Others	Others	Sclareol, a labdane-type diterpene isolated from clary sage (Salvia sclarea), exerts growth inhibition and cytotoxic activity against a variety of human cancer cell lines.	308.5	515-03-7	61	197.73	<1		http://selleckchem.com/products/Sclareol.html	C20H36O2	free base	N/A	CC1(C)CCCC2(C)C1CCC(C)(O)C2CCC(C)(O)C=C	4.27	0	0	4
S2357	Silibinin	2	f16	in 10mM DMSO	CFDA	BP2019;EP9.2;Martindale:The Extra Pharmacopoeia	N/A	Inflammation	Others	Others	Silibinin, the main flavonoid extracted from the milk thistle Silybum marianum, displays hepatoprotective properties in acute and chronic liver injury.	482.44	22888-70-6	96	198.99	<1		http://selleckchem.com/products/Silibinin(Silybin).html	C25H22O10	free base	Silybin	COC1=CC(=CC=C1O)C2OC3=CC(=CC=C3OC2CO)C4OC5=CC(=CC(=C5C(=O)C4O)O)O	2.592	5	5	4
S2358	Silymarin	2	h16	in 10mM DMSO	CFDA	Martindale:The Extra Pharmacopoeia	N/A	Inflammation	Others	Others	Silymarin (Silybin B), a polyphenolic flavonoid extracted from the seeds of Silybum marianum or milk thistle, is used in the prevention and treatment of liver diseases and primary liver cancer.	482.44	65666-07-1	96	198.99	<1		http://selleckchem.com/products/Silymarin(Silybin-B).html	C25H22O10	free base	Silybin B	COC1=CC(=CC=C1O)C2OC3=CC=C(C=C3OC2CO)C4OC5=C(C(=CC(=C5)O)O)C(=O)C4O	2.592	5	5	4
S2359	Sinomenine	2	j16	in 10mM DMSO	N/A	BP2019;EP9.2;CP2005	N/A	Infection/Inflammation/Neurological Disease/Respiratory Disease	Others	Others	Sinomenine, a pure alkaloid extracted from the chinese medical plant Sinomenium acutum, is used for the treatment of rheumatism and arthritis.	329.39	115-53-7	65	197.33	65	197.33	http://selleckchem.com/products/Sinomenine(Cucoline).html	C19H23NO4	free base	Cucoline, Kukoline	COC1=CC2C3CC4=C(C(=C(OC)C=C4)O)C2(CCN3C)CC1=O	1.674	3	1	2
S2362	Synephrine	2	l16	in 10mM DMSO	NDC	N/A	N/A	Neurological Disease	Adrenergic Receptor	GPCR & G Protein	Synephrine, a natural protoalkaloid in the extract of bitter orange and other citrus species, is commonly used for weight loss.	167.21	94-07-5	33	197.36	<1		http://selleckchem.com/products/Synephrine(Oxedrine).html	C9H13NO2	free base	Oxedrine	CNCC(O)C1=CC=C(O)C=C1	0.615	0	3	3
S2364	Tanshinone I	2	n16	in 10mM DMSO	CFDA	N/A	N/A	Cancer/Inflammation	Phospholipase (e.g. PLA)	Metabolism	Tanshinone I, an active principle isolated from Salvia miltiorrhiza (Danshen), is structurally similar to tanshinone IIA and may possess similar cytotoxic effects on tumor cells.	276.29	568-73-0	23	83.25	<1		http://selleckchem.com/products/Tanshinone-I.html	C18H12O3	free base	N/A	CC1=COC2=C1C(=O)C(=O)C3=C2C=CC4=C(C)C=CC=C34	4.084	3	0	0
S2365	Tanshinone IIA	2	p16	in 10mM DMSO	N/A	BP2019;EP9.2	N/A	Cardiovascular Disease	Lipase	Metabolism	Tanshinone IIA(Tanshinone B) is the most abundant diterpene quinone in Danshen, Salviae miltiorrhizae Radix, a widely prescribed traditional herbal medicine that is used to treat cardiovascular and inflammatory diseases A natural monoacylglycerol lipase inhibitor.	294.34	568-72-9	5	16.99	<1		http://selleckchem.com/products/Tanshinone-IIA(Tanshinone-B).html	C19H18O3	free base	Tanshinone B	CC1=COC2=C1C(=O)C(=O)C3=C2C=CC4=C3CCCC4(C)C	4.66	3	0	0
S2366	Taxifolin (Dihydroquercetin)	2	b18	in 10mM DMSO	N/A	BP2019;EP9.2	N/A	Cardiovascular Disease	VEGFR	Angiogenesis	Taxifolin, type I inhibitor for VEGFR-2 kinase, is a flavonoid in many plants such as Taxus chinensis, Siberian larch, Cedrus deodara and so on.	304.25	480-18-2	60	197.21	<1		http://selleckchem.com/products/Taxifolin(Dihydroquercetin).html	C15H12O7	free base	N/A	OC1C(OC2=CC(=CC(=C2C1=O)O)O)C3=CC(=C(O)C=C3)O	1.479	2	5	1
S2369	Troxerutin	2	d18	in 10mM DMSO	DMF,CFDA,NDC	EP9.3;BP2019;Martindale:The Extra Pharmacopoeia	N/A	Angiology/Cardiovascular Disease	Others	Others	Troxerutin, a natural bioflavonoid isolated from Sophora japonica., has been reported to have many benefits and medicinal properties.	742.68	7085-55-4	100	134.65	100	134.65	http://selleckchem.com/products/Troxerutin.html	C33H42O19	free base	N/A	CC1OC(OCC2OC(OC3=C(OC4=CC(=CC(=C4C3=O)O)OCCO)C5=CC(=C(OCCO)C=C5)OCCO)C(O)C(O)C2O)C(O)C(O)C1O	-2.1	9	10	15
S2370	Ursolic Acid	2	f18	in 10mM DMSO	N/A	BP2019;EP9.2;CP2005	N/A	Cardiovascular Disease	Others	Others	Ursolic acid (Malol) is a pentacyclic triterpene acid, used in cosmetics.	456.7	77-52-1	91	199.26	<1		http://selleckchem.com/products/Ursolic-acid(Malol).html	C30H48O3	free base	NSC 167406, NSC-4060	CC1CC(C2CCC3(C)C(=CCC4C5(C)CCC(O)C(C)(C)C5CCC34C)C2C1C)C(O)=O	6.327	1	1	1
S2373	Yohimbine HCl	2	h18	in 10mM DMSO	DMF	USP42-NF37;BP2019;EP9.2;Martindale:The Extra Pharmacopoeia	N/A	Neurological Disease	Adrenergic Receptor	Neuronal Signaling	Yohimbine has been used as a mydriatic and in the treatment of impotence. It is also alleged to be an aphrodisiac.	390.9	65-19-0	12	30.7	<1		http://selleckchem.com/products/Yohimbine-hydrochloride(Antagonil).html	C21H27ClN2O3	Hydrochloride	Antagonil	Cl.COC(=O)C1C(O)CCC2CN3CCC4=C([NH]C5=C4C=CC=C5)C3CC12	3.204	2	2	2
S2374	5-hydroxytryptophan (5-HTP)	2	j18	in 10mM DMSO	DMF,NDC	N/A	N/A	Psychotic disorders	Others	Others	5-Hydroxytryptophan (5-HTP), also known as oxitriptan (INN), is a naturally occurring amino acid and chemical precursor for the treatment of depression.	220.22	56-69-9	44	199.8	4	18.16	http://selleckchem.com/products/5-hydroxytryptophan(5-HTP).html	C11H12N2O3	free base	NSC-92523	NC(CC1=C[NH]C2=CC=C(O)C=C12)C(O)=O	-1.554	1	3	3
S2375	Aloin	2	l18	in 10mM DMSO	N/A	Martindale:The Extra Pharmacopoeia;CP2005	N/A	Gastroenterology	Tyrosinase	Proteases	Aloin, a natural anthracycline from Aloe vera, is a tyrosinase inhibitor.	418.39	1415-73-2	83	198.38	83	198.38	http://selleckchem.com/products/Aloin(Barbaloin).html	C21H22O9	free base	Barbaloin, Barbalin	OCC1OC(C(O)C(O)C1O)C2C3=C(C(=CC=C3)O)C(=O)C4=C2C=C(CO)C=C4O	-0.404	2	7	3
S2376	Ammonium Glycyrrhizinate	2	n18	in 10mM DMSO	CFDA	N/A	N/A	Respiratory Disease	Dehydrogenase	Metabolism	Ammonium Glycyrrhizinate inhibits growth and cytopathology of several unrelated DNA and RNA viruses.	839.96	1407-03-0	168	200.01	5	5.95	http://selleckchem.com/products/Ammonium-Glycyrrhizinate(AMGZ).html	C42H65NO16	Glycyrrhizic acid salt	AMGZ, Glycyram	N.CC1(C)C(CCC2(C)C1CCC3(C)C2C(=O)C=C4C5CC(C)(CCC5(C)CCC34C)C(O)=O)OC6OC(C(O)C(O)C6OC7OC(C(O)C(O)C7O)C(O)=O)C(O)=O	-0.915	8	5	7
S2378	Butylscopolamine Bromide	2	p18	in 10mM DMSO	CFDA	N/A	N/A	Neurological Disease	Others	Others	Butylscopolamine Bromide, is a peripherally acting antimuscarinic, anticholinergic agent used as an abdominal-specific antispasmodic.	440.37	149-64-4	88	199.83	88	199.83	http://selleckchem.com/products/butylscopolamine-bromide.html	C21H30BrNO4	Bromide	Scopolamine Butylbromide	[Br-].CCCC[N+]1(C)C2CC(CC1C3OC23)OC(=O)C(CO)C4=CC=CC=C4	-1.62	3	1	8
S2379	Dioscin	2	b20	in 10mM DMSO	CFDA	N/A	N/A	Cancer	Others	Others	Dioscin is a saponin extracted and isolated from Polygonatum Zanlanscianense Pamp, showing antitumor activities.	869.04	19057-60-4	100	115.07	<1		http://selleckchem.com/products/Dioscin(Collettiside-III).html	C45H72O16	free base	Collettiside III, Saponin	CC1CCC2(OC1)OC3CC4C5CC=C6CC(CCC6(C)C5CCC4(C)C3C2C)OC7OC(CO)C(OC8OC(C)C(O)C(O)C8O)C(O)C7OC9OC(C)C(O)C(O)C9O	1.169	8	8	7
S2380	Diosmetin	2	d20	in 10mM DMSO	NDC	N/A	N/A	Immunology/Infection	P450 (e.g. CYP17)	Metabolism	Diosmetin is a bioflavonoid found in spearmint, oregano, and many other plants.	300.26	520-34-3	60	199.83	<1		http://selleckchem.com/products/Diosmetin(Luteolin-4-methyl-ether).html	C16H12O6	free base	Luteolin 4-methyl ether	COC1=CC=C(C=C1O)C2=CC(=O)C3=C(O)C=C(O)C=C3O2	2.394	3	3	2
S2381	D-Mannitol	2	f20	in 10mM DMSO	DMF	USP42-NF37;JP17;BP2018;IP2010	N/A	Metabolic Disease	Others	Others	D-Mannitol is an osmotic diuretic agent and a weak renal vasodilator.	182.17	69-65-8	36	197.62	36	197.62	http://selleckchem.com/products/D-Mannitol(Osmitrol).html	C6H14O6	free base	Osmitrol	OCC(O)C(O)C(O)C(O)CO	-2.941	0	6	5
S2382	Evodiamine	2	h20	in 10mM DMSO	N/A	EP9.2	N/A	Cancer/Inflammation	NF-κB	NF-κB	Evodiamine (Isoevodiamine), an alkaloid extract from the fruit of Evodiae Fructus exhibits antitumor activities against the human tumor cells. It is shown to inhibit <b>NF-kB</b> activation through suppression of <b>IkB kinase</b> activity.	303.36	518-17-2	12	39.56	<1		http://www.selleck.cn/products/Evodiamine(Isoevodiamine).html	C19H17N3O	Free Base	Isoevodiamine	CN1C2N(CCC3=C2[NH]C4=CC=CC=C34)C(=O)C5=C1C=CC=C5	3.673	1	1	0
S2383	Gastrodin	2	j20	in 10mM DMSO	CFDA	CP2005	N/A	Neurological Disease	Immunology & Inflammation related	Immunology & Inflammation	Gastrodin, an anti-inflammatory polyphenol extracted from Chinese natural herbal Gastrodia elata Blume., benefits neurodegenerative diseases.	286.28	62499-27-8	50	174.65	<1		http://selleckchem.com/products/Gastrodin(Gastrodine).html	C13H18O7	free base	Gastrodine	OCC1OC(OC2=CC=C(CO)C=C2)C(O)C(O)C1O	-0.947	2	5	4
S2384	Hematoxylin	2	l20	in 10mM DMSO	N/A	USP42-NF37;IP2010	N/A	Others	Others	Others	Hematoxylin (Hydroxybrazilin) is a compound that forms strongly colored complexes with certain metal ions, notably Fe(III) and Al(III) salts and a kind of stain in histology.	302.28	517-28-2	61	201.8	61	201.8	http://selleckchem.com/products/Hematoxylin(Hydroxybrazilin).html	C16H14O6	free base	Hydroxybrazilin	OC1=CC2=C(C=C1O)C3C4=C(OCC3(O)C2)C(=C(O)C=C4)O	1.691	1	4	0
S2386	Indirubin	2	n20	in 10mM DMSO	CFDA	BP2019;EP9.2;CP2005	N/A	Cancer/Hematology	GSK-3	PI3K/Akt/mTOR	Indirubin is a potent cyclin-dependent kinases and GSK-3β inhibitor with IC50 of about 5 μM and 0.6 μM.	262.26	479-41-4	53	202.09	<1		http://selleckchem.com/products/Indirubin.html	C16H10N2O2	free base	NSC 105327	O=C1NC2=CC=CC=C2\C1=C3/NC4=C(C=CC=C4)C3=O	1.876	2	2	0
S2387	Lappaconite HBr	2	p20	in 10mM DMSO	CFDA	N/A	N/A	Cardiovascular Disease	Immunology & Inflammation related	Immunology & Inflammation	Lappaconite Hydrobromide is a kind of alkaloid extracted from Aconitum sinomontanum Nakai and has anti-inflammatory effects.	665.61	97792-45-5	28	42.07	<1		http://selleckchem.com/products/Lappaconite-Hydrobromide.html	C32H45BrN2O8	Hydrobromide	N/A	Br.CCN1CC2(CCC(OC)C34C2CC(C13)C5(O)CC(OC)C6CC4C5(O)C6OC)OC(=O)C7=C(NC(C)=O)C=CC=C7	0.52	6	1	8
S2388	L-carnitine	2	b22	in 10mM DMSO	DMF,NDC	N/A	N/A	Metabolic Disease	Others	Others	L-carnitine is constituent of striated muscle and liver. It is used therapeutically to stimulate gastric and pancreatic secretions and in the treatment of hyperlipoproteinemias.	161.2	541-15-1	12	74.44	32	198.51	http://selleckchem.com/products/L-carnitine(Levocarnitine).html	C7H15NO3	quaternary-N salt	Levocarnitine	C[N+](C)(C)CC(O)CC([O-])=O	-3.29	0	1	4
S2389	Naringin Dihydrochalcone	2	d22	in 10mM DMSO	N/A	BP2019;EP9.2;CP2005;Martindale:The Extra Pharmacopoeia	N/A	Metabolic Disease	P450 (e.g. CYP17)	Metabolism	Naringin Dihydrochalcone(Naringin DC) is a new-style sweetening agent and an artificial sweetener derived from naringin and also an inhibitor of CYP enzymes.	582.55	18916-17-1	100	171.66	<1		http://selleckchem.com/products/Naringin-Dihydrochalcone(Naringin-DC).html	C27H34O14	free base	N/A	CC1OC(OC2C(O)C(O)C(CO)OC2OC3=CC(=C(C(=O)CCC4=CC=C(O)C=C4)C(=C3)O)O)C(O)C(O)C1O	-0.032	5	9	9
S2390	Polydatin	2	f22	in 10mM DMSO	NDC	BP2019;EP9.2;CP2005	N/A	Cardiovascular Disease/Infection/Respiratory Disease	Phospholipase (e.g. PLA)	Metabolism	Polydatin is a crystal component extracted from the root stem of perennial herbage Polygonum Cuspidatum Sieb.et Zucc.	390.38	65914-17-2	78	199.81	<1		http://selleckchem.com/products/Polydatin(Piceid).html	C20H22O8	free base	Piceid	OCC1OC(OC2=CC(=CC(=C2)\C=C\C3=CC=C(O)C=C3)O)C(O)C(O)C1O	1.16	2	6	5
S2391	Quercetin	2	h22	in 10mM DMSO	DMF,NDC	USP42-NF37;BP2019;EP9.2;Martindale:The Extra Pharmacopoeia	N/A	Cancer/Cardiovascular Disease/Endocrinology/Metabolic Disease/Inflammation	Src,Sirtuin,PKC,PI3K	Epigenetics	Quercetin, a natural flavonoid present in vegetables, fruit and wine, is a stimulator of recombinant SIRT1 and also a PI3K inhibitor with IC50 of 2.4-5.4 μM. Phase 4.	302.24	117-39-5	61	201.83	<1		http://selleckchem.com/products/Quercetin(Sophoretin).html	C15H10O7	Free Base	Sophoretin	OC1=CC(=C2C(=O)C(=C(OC2=C1)C3=CC=C(O)C(=C3)O)O)O	1.63	2	5	1
S2393	Sorbitol	2	j22	in 10mM DMSO	FDA,DMF,CFDA,NDC,HMA	USP42-NF37;EP9.8;BP2019;JP17;IP2010;Martindale:The Extra Pharmacopoeia	080224	Others	Others	Others	Sorbitol is a sugar alcohol and a sugar substitute.	182.17	50-70-4	36	197.62	36	197.62	http://selleckchem.com/products/Sorbitol(Glucitol).html	C6H14O6	free base	Glucitol	OCC(O)C(O)C(O)C(O)CO	-2.941	0	6	5
S2396	Salidroside	2	l22	in 10mM DMSO	N/A	CP2005	N/A	Cancer	Others	Others	Salidroside, a phenylpropanoid glycoside isolated from Rhodiola rosea, has been reported to have a broad spectrum of pharmacological properties.	300.3	10338-51-9	60	199.8	60	199.8	http://selleckchem.com/products/Salidroside-Rhodioloside.html	C14H20O7	free base	Rhodioloside	OCC1OC(OCCC2=CC=C(O)C=C2)C(O)C(O)C1O	-0.443	2	5	5
S2397	Palmatine chloride	2	n22	in 10mM DMSO	N/A	BP2019	N/A	Infection/Ophthalmology	Others	Others	Palmatine hydrochloride (Palmatine chloride (6CI,7CI) Fibrauretin) is a hydrochloride salt of palmatine which is a protoberberine alkaloid.	387.86	10605-02-4	77	198.53	5	12.89	http://selleckchem.com/products/Palmatine-chloride.html	C21H22ClNO4	Chloride	N/A	[Cl-].COC1=CC=C2C=C3C4=C(CC[N+]3=CC2=C1OC)C=C(OC)C(=C4)OC	1.488	4	0	4
S2401	Sodium Danshensu	2	p22	in 10mM DMSO	N/A	CP2005	N/A	Cardiovascular Disease	P450 (e.g. CYP17)	Metabolism	Sodium Danshensu is a mono sodium of danshensu, which is a natural phenolic acid of caffeic acid derivatives isolated from Salvia miltiorrhiza.	220.15	67920-52-9	7	31.8	2	9.08	http://selleckchem.com/products/Sodium-Danshensu.html	C9H9NaO5	Sodium Salt	N/A	[Na+].OC(CC1=CC(=C(O)C=C1)O)C([O-])=O	-0.795	0	3	3
S2403	Tetrandrine	3	a3	in 10mM DMSO	CFDA	EP8.8,BP2017	N/A	Others	Calcium Channel	Transmembrane Transporters	Tetrandrine, a bis-benzylisoquinoline alkaloid derived from Stephania tetrandra, is a calcium channel blocker.	622.75	518-34-3	7	11.24	<1		http://www.selleck.cn/products/Tetrandrine-Fanchinine.html	C38H42N2O6	Free Base	Fanchinine	COC1=CC=C2CC3N(C)CCC4=CC(=C(OC)C(=C34)OC5=C(OC)C=C6CCN(C)C(CC7=CC=C(OC1=C2)C=C7)C6=C5)OC	7.218	6	0	4
S2410	Paeoniflorin	3	c3	in 10mM DMSO	N/A	BP2019;EP9.2	N/A	Cardiovascular Disease/Respiratory Disease	Others	Others	Paeoniflorin is a herbal constituent extracted from the root of Paeonia albiflora Pall.	480.46	23180-57-6	96	199.81	96	199.81	http://selleckchem.com/products/paeoniflorin.html	C23H28O11	free base	N/A	CC12CC3(O)OC(O1)C4(COC(=O)C5=CC=CC=C5)C3CC24OC6OC(CO)C(O)C(O)C6O	-1.283	6	4	7
S2411	Geniposide	3	e3	in 10mM DMSO	N/A	BP2019;EP9.2;CP2005	N/A	Cardiovascular Disease/Endocrinology/Metabolic Disease	Others	Others	Geniposide is an iridoid glycoside isolated from the fruit of Gardenia jasminoides Ellis.	388.37	24512-63-8	78	200.84	78	200.84	http://selleckchem.com/products/geniposide.html	C17H24O10	free base	N/A	COC(=O)C1=COC(OC2OC(CO)C(O)C(O)C2O)C3C1CC=C3CO	-2.066	5	5	6
S2422	Ipriflavone (Osteofix)	3	g3	in 10mM DMSO	CFDA,PMDA	JP17;Martindale:The Extra Pharmacopoeia	N/A	Others	Others	Others	Ipriflavone (7-Isopropoxyisoflavon) is used to inhibit bone resorption.	280.32	35212-22-7	56	199.77	<1		http://selleckchem.com/products/ipriflavone.html	C18H16O3	free base	N/A	CC(C)OC1=CC=C2C(=C1)OC=C(C2=O)C3=CC=CC=C3	3.576	3	0	3
S2423	(S)-10-Hydroxycamptothecin	3	i3	in 10mM DMSO	DMF	N/A	N/A	Cancer	Topoisomerase	DNA Damage	10-Hydroxycamptothecin is a DNA topoisomerase I inhibitor with potent anti-tumor activity.	364.35	19685-09-7	8	21.96	<1		http://selleckchem.com/products/10-hydroxycamptothecin.html	C20H16N2O5	free base	10-HCPT	CCC1(O)C(=O)OCC2=C1C=C3N(CC4=CC5=CC(=CC=C5N=C34)O)C2=O	1.504	4	1	1
S2437	Rotundine	3	k3	in 10mM DMSO	CFDA	N/A	N/A	Neurological Disease	Dopamine Receptor	Neuronal Signaling	Rotundine (L-tetrahydropalmatine, L-THP) is a selective dopamine D1 receptor antagonist with IC50 of 166 nM.	355.43	483-14-7	8	22.51	<1		http://selleckchem.com/products/rotundine.html	C21H25NO4	free base	N/A	COC1=CC2=C(C=C1OC)C3CC4=CC=C(OC)C(=C4CN3CC2)OC	3.599	4	0	4
S2438	Synephrine HCl	3	m3	in 10mM DMSO	NDC	N/A	N/A	Neurological Disease	Adrenergic Receptor	Neuronal Signaling	SynephrineHCl (Oxedrine, p-Synephrine) is a sympathomimetic α-adrenergic receptor (AR) agonist.	203.67	5985-28-4	14	68.74	41	201.31	http://selleckchem.com/products/synephrine-hcl.html	C9H14ClNO2	Hydrochloride	N/A	Cl.CNCC(O)C1=CC=C(O)C=C1	0.997	0	3	3
S2439	Guanosine	3	o3	in 10mM DMSO	N/A	Martindale:The Extra Pharmacopoeia	N/A	Others	Others	Others	Guanosine is a purine nucleoside comprising guanine attached to a ribose (ribofuranose) ring via a &beta-N9-glycosidic bond.	283.24	118-00-3	56	197.71	<1		http://selleckchem.com/products/guanosine.html	C10H13N5O5	free base	N/A	NC1=NC2=C(N=C[N]2C3OC(CO)C(O)C3O)C(=O)N1	-2.38	4	5	2
S2442	Inosine	3	a5	in 10mM DMSO	DMF,CFDA,NDC,HMA	USP42-NF37;BP2019;EP9.2;CP2005;Martindale:The Extra Pharmacopoeia	N/A	Cardiovascular Disease/Hematology/Immunology/Inflammation/Infection/Ophthalmology	Others	Others	Inosine is a nucleoside that is formed when hypoxanthine is attached to a ribose ring via a &beta-N9-glycosidic bond.	268.23	58-63-9	53	197.59	47	175.22	http://selleckchem.com/products/inosine.html	C10H12N4O5	free base	NSC 20262, INO 495	OCC1OC(C(O)C1O)[N]2C=NC3=C2N=CNC3=O	-2.249	4	4	2
S2443	Tolbutamide	3	c5	in 10mM DMSO	FDA,DMF,CFDA,NDC	USP42-NF37;BP2019;EP9.2;KP Ⅹ;Ph.Int_6th;JP17;IP2010;Martindale:The Extra Pharmacopoeia	012678,086047,086109,086141,086445,086574,086926,087093,087121,087318,087541,087876,088893,088950,089110,089111	Endocrinology/Metabolic Disease	Potassium Channel	Transmembrane Transporters	Tolbutamide is an inhibitor of potassium channel, used for type II diabetes.	270.35	64-77-7	54	199.74	<1		http://selleckchem.com/products/tolbutamide.html	C12H18N2O3S	free base	HLS 831	CCCCNC(=O)N[S](=O)(=O)C1=CC=C(C)C=C1	2.336	3	2	5
S2446	Levosimendan	3	e5	in 10mM DMSO	DMF,CFDA,HMA	Martindale:The Extra Pharmacopoeia	N/A	Cardiovascular Disease	Calcium Channel	Transmembrane Transporters	Levosimendan is a calcium sensitizer acting through calcium-dependent binding to cardiac troponin C (cTnC), provides treatment for heart failure.	280.28	141505-33-1	56	199.8	<1		http://selleckchem.com/products/levosimendan.html	C14H12N6O	free base	N/A	CC1CC(=O)NN=C1C2=CC=C(NN=C(C#N)C#N)C=C2	1.486	3	2	3
S2450	Equol	3	g5	in 10mM DMSO	NDC	N/A	N/A	Cancer	Estrogen/progestogen Receptor	Endocrinology & Hormones	Equol ,a metabolite of soybeans, is an important isoflavone in humans，specifically binds to 5α-DHT, has a modest affinity for recombinant estrogen receptor ERβ. Phase 2.	242.27	531-95-3	48	198.13	<1		http://selleckchem.com/products/equol.html	C15H14O3	free base	N/A	OC1=CC=C(C=C1)C2COC3=CC(=CC=C3C2)O	3.211	1	2	1
S2451	Amantadine HCl	3	i5	in 10mM DMSO	FDA,DMF,CFDA,NDC,PMDA,HMA	USP42-NF37;BP2019;EP9.2;KP Ⅹ;JP17;IP2010;Martindale:The Extra Pharmacopoeia	070589,071293,071382,072655,073115,074028,074170,074509,075060,075819,076186,076352,077659,077992,078720,207570,207571,208096,208107,208278,208966,209035,209047,209171,209221,210403	Infection/Neurological Disease	Dopamine Receptor	Neuronal Signaling	Amantadine HCl is used to treat or prevent infections of the respiratory tract caused by a certain virus.	187.7	665-66-7	38	202.45	38	202.45	http://selleckchem.com/products/Amantadine-hydrochloride(Symmetrel).html	C10H18ClN	Hydrochloride	1-adamantanamine HCl	Cl.N[C]12CC3[CH2][CH](C[CH]([CH2]3)C1)C2	1.877	0	1	0
S2452	Amfebutamone (Bupropion) HCl	3	k5	in 10mM DMSO	CFDA	N/A	N/A	Psychotic disorders	AChR,Dopamine Receptor	Neuronal Signaling	Amfebutamone (Bupropion) HCl is a selective norepinephrine-dopamine reuptake inhibitor with IC50 of 6.5 and 3.4 μM for the reuptake of dopamine and norepinephrine, respectively.	276.2	31677-93-7	8	28.96	<1		http://selleckchem.com/products/Amfebutamone-hydrochloride(Bupropion).html	C13H19Cl2NO	Hydrochloride	N/A	Cl.CC(NC(C)(C)C)C(=O)C1=CC=CC(=C1)Cl	3.501	1	1	4
S2453	Benserazide HCl	3	m5	in 10mM DMSO	CFDA,HMA	BP2019;KP Ⅹ;EP9.2;JP17;Martindale:The Extra Pharmacopoeia	N/A	Respiratory Disease	Decarboxylase	Metabolism	Benserazide HCl is a peripherally-acting aromatic L-amino acid decarboxylase (AAAD) or DOPA decarboxylase inhibitor.	293.7	14919-77-8	58	197.48	58	197.48	http://selleckchem.com/products/Benserazide-hydrochloride(Serazide).html	C10H16ClN3O5	Hydrochloride	Ro-4-4602	Cl.NC(CO)C(=O)NNCC1=C(O)C(=C(O)C=C1)O	-1.245	1	7	5
S2454	Bupivacaine HCl	3	o5	in 10mM DMSO	FDA,DMF,CFDA,NDC,PMDA,HMA	USP42-NF37;BP2019;EP9.2;Ph.Int_6th;JP17;IP2010;Martindale:The Extra Pharmacopoeia	018053,022046,070583,070584,070585,070586,070587,070590,070597,070609,071810,091503,207183,207266,209087,211096	Neurological Disease	Sodium Channel	Transmembrane Transporters	Bupivacaine HCl binds to the intracellular portion of voltage-gated sodium channels and blocks sodium influx into nerve cells, used for treating cardiac arrhythmias.	324.89	18010-40-7	65	200.07	23	70.79	http://selleckchem.com/products/Bupivacaine-hydrochloride(Marcain).html	C18H29ClN2O	Hydrochloride	N/A	Cl.CCCCN1CCCCC1C(=O)NC2=C(C)C=CC=C2C	4.692	1	1	5
S2455	Bethanechol chloride	3	a7	in 10mM DMSO	FDA,DMF,NDC,PMDA	USP42-NF37;KP Ⅹ;JP17;Martindale:The Extra Pharmacopoeia	040483,040485,040492,040509,040518,040532,040533,040534,040551,040552,040553,040554,040633,040634,040635,040636,040677,040721,040725,040726,040727,040728,040855,040897,084074,084353,084378,084379,084383,084384,084402,084408,084441,084689,084702,084712,085228,085229,085230,085839,085841,085842,087397,087444,088288,088289,089815,091256	Neurological Disease	AChR	Neuronal Signaling	Bethanechol chloride is a selective muscarinic receptor agonist without any effect on nicotinic receptors.	196.68	590-63-6	39	198.29	39	198.29	http://selleckchem.com/products/Carbamyl-beta-methylcholine-chloride(Bethanechol-chloride).html	C7H17ClN2O2	quaternary-N Chloride salt	N/A	[Cl-].CC(C[N+](C)(C)C)OC(N)=O	-3.702	2	1	4
S2456	Chlorpromazine HCl	3	c7	in 10mM DMSO	FDA,DMF,CFDA,NDC,PMDA	USP42-NF37;BP2019;KP Ⅹ;EP9.2;JP17;Ph.Int_6th;IP2010;Martindale:The Extra Pharmacopoeia	040224,040231,080340,080365,080370,080403,080439,083329,083386,083549,083574,083575,084112,084113,084114,084115,084411,084412,084413,084414,084415,084789,084800,084801,084802,084803,084911,085331,085484,085591,085748,085750,085751,085752,085956,085957,085958,085959,085960,086712,086863,087032,087053,087645,087646,087783,087865,087878,087880,087884,088038,089563,209755	Psychotic disorders	Potassium Channel,Dopamine Receptor	Neuronal Signaling	Chlorpromazine HCl is a dopamine and potassium channel inhibitor with IC50 of 6.1 and 16 μM for inward-rectifying K+ currents and time-independent outward currents.	355.33	69-09-0	71	199.81	71	199.81	http://selleckchem.com/products/Chlorpromazine-hydrochloride(Sonazine).html	C17H20Cl2N2S	Hydrochloride	Sonazine	Cl.CN(C)CCCN1C2=C(SC3=C1C=C(Cl)C=C3)C=CC=C2	5.121	0	0	4
S2457	Clindamycin HCl	3	e7	in 10mM DMSO	FDA,DMF,CFDA,NDC,PMDA,HMA	USP42-NF37 ;EP9.3;BP2019;KP Ⅹ;Ph.Int_6th;JP17;Martindale:The Extra Pharmacopoeia	063027,063029,063082,063083,065061,065194,065217,065242,065243,065442,091225,207402	Infection/Parasitology	Anti-infection	Microbiology	Clindamycin HCl inhibits protein synthesis by acting on the 50S ribosomal, used for the treatment of bacterial infections.	461.44	21462-39-5	92	199.38	92	199.38	http://selleckchem.com/products/Clindamycin-hydrochloride(Dalacin).html	C18H34Cl2N2O5S	Hydrochloride	N/A	Cl.CCCC1CC(N(C)C1)C(=O)NC(C(C)Cl)C2OC(SC)C(O)C(O)C2O	1.659	2	4	7
S2458	Clonidine HCl	3	g7	in 10mM DMSO	FDA,DMF,CFDA,NDC,PMDA,HMA	USP42-NF37;BP2019;KP Ⅹ;EP9.2;JP17;IP2010;Martindale:The Extra Pharmacopoeia	070317,070395,070396,070397,070459,070460,070461,070659,070702,070747,070881,070882,070883,070886,070923,070963,070964,070965,070974,070975,070976,071101,071102,071103,071252,071253,071254,071785,072138,072139,072140,077901,078099,078895,090329,091104,091368,200300,200673,202297,202601,202792,202983,202984,203167,203320,209285,209675,209686,209757,210052,210338,210680,211433	Cardiovascular Disease/Neurological Disease	Adrenergic Receptor,Autophagy	Neuronal Signaling	Clonidine HCl is a direct-acting α2 adrenergic agonist with an ED50 of 0.02±0.01 mg/kg.	266.5	4205-91-8	53	198.87	53	198.87	http://selleckchem.com/products/Clonidine-hydrochloride(Catapres).html	C9H10Cl3N3	Hydrochloride	N/A	Cl.ClC1=C(NC2=NCCN2)C(=CC=C1)Cl	2.736	1	2	2
S2459	Clozapine	3	i7	in 10mM DMSO	FDA,DMF,CFDA,NDC,PMDA,HMA	USP42-NF37;BP2019;EP9.2;IP2010;Martindale:The Extra Pharmacopoeia	074546,074949,075162,075417,075713,076809,090308,201824,201824,202873,203039,203807,206433,209480	Psychotic disorders	5-HT Receptor	Neuronal Signaling	Clozapine is an atypical antipsychotic drug by acting as a 5-HT antagonist, used in the treatment of schizophrenia.	326.82	5786-21-0	65	198.89	<1		http://selleckchem.com/products/Clozapine(Clozaril).html	C18H19ClN4	free base	HF 1854, LX 100-129	CN1CCN(CC1)C2=NC3=C(NC4=C2C=CC=C4)C=CC(=C3)Cl	3.422	1	1	1
S2460	Pramipexole	3	k7	in 10mM DMSO	FDA,DMF,EMA,HMA,CFDA,NDC,PMDA	USP42-NF37;BP2019;EP9.2;Martindale:The Extra Pharmacopoeia	077724,077854,078551,078894,078920,090151,090190,090241,090764,090781,090865,091254,091450,091683,201963,202164,202206,202353,202633,202702,202891,203354,203615,203855,204518,206156,207011,211088	Neurological Disease	Dopamine Receptor	Neuronal Signaling	Pramipexole is a partial/full D2S, D2L, D3, D4 receptor agonist with a Ki of 3.9, 2.2, 0.5 and 5.1 nM for D2S, D2L, D3, D4 receptor, respectively.	211.33	104632-26-0	42	198.74	<1		http://selleckchem.com/products/Pramipexole-Mirapex.html	C10H17N3S	Free Base	SND 919	CCCNC1CCC2=C(C1)SC(=N2)N	1.383	1	2	3
S2461	Domperidone	3	m7	in 10mM DMSO	DMF,CFDA,PMDA,HMA	;BP2019;EP9.2;KP Ⅹ;JP17;IP2010;CP2005;Martindale:The Extra Pharmacopoeia	N/A	Gastroenterology	Dopamine Receptor	Neuronal Signaling	Domperidone is an oral dopamine D2 receptor antagonist, used to treat nausea and vomiting.	425.91	57808-66-9	48	112.7	<1		http://selleckchem.com/products/Domperidone(Motilium).html	C22H24ClN5O2	free base	N/A	ClC1=CC2=C(C=C1)N(C3CCN(CCCN4C(=O)NC5=C4C=CC=C5)CC3)C(=O)N2	2.453	2	2	5
S2466	Estriol	3	o7	in 10mM DMSO	DMF,CFDA,NDC,PMDA,HMA	USP42-NF37;BP2019;EP9.5;KP Ⅹ;JP17;Martindale:The Extra Pharmacopoeia	N/A	Endocrinology	Estrogen/progestogen Receptor	Endocrinology & Hormones	Estriol is an antagonist of the G-protein coupled estrogen receptor in estrogen receptor-negative breast cancer cells.	288.39	50-27-1	57	197.65	<1		http://selleckchem.com/products/Estriol(Oestriol).html	C18H24O3	free base	NSC-12169	CC12CCC3C(CCC4=CC(=CC=C34)O)C1CC(O)C2O	2.871	0	3	0
S2467	Famciclovir	3	a9	in 10mM DMSO	FDA,DMF,CFDA,NDC,PMDA,HMA	USP42-NF37;Martindale:The Extra Pharmacopoeia;CP2005	077487,078278,090128,091114,091480,201022,201333,202438	Infection	Anti-infection	Microbiology	Famciclovir is a guanine analogue antiviral drug used for the treatment of various herpesvirus infections.	321.34	104227-87-4	64	199.17	64	199.17	http://selleckchem.com/products/Famciclovir(Famvir).html	C14H19N5O4	free base	BRL-42810	CC(=O)OCC(CC[N]1C=NC2=CN=C(N)N=C12)COC(C)=O	-0.294	7	1	9
S2468	Fenbendazole	3	c9	in 10mM DMSO	DMF	USP42-NF37;BP2019;EP9.2;IP2010;Martindale:The Extra Pharmacopoeia	N/A	Infection/Parasitology	Anti-infection	Microbiology	Fenbendazole is a broad spectrum benzimidazole anthelmintic used against gastrointestinal parasites with an IC50 of about 0.01 μg/mL.	299.35	43210-67-9	4	13.36	<1		http://selleckchem.com/products/Fenbendazole(Panacur).html	C15H13N3O2S	free base	N/A	COC(=O)NC1=NC2=C([NH]1)C=C(SC3=CC=CC=C3)C=C2	3.769	3	2	4
S2470	Fluocinolone Acetonide	3	e9	in 10mM DMSO	FDA,DMF,NDC,PMDA,HMA	USP42-NF37;BP2019;EP9.2;KP Ⅹ;IP2010;Martindale:The Extra Pharmacopoeia	040035,040041,040042,040059,086810,086811,087102,087104,087159,088045,088046,088047,088048,088167,088168,088169,088170,088312,088361,088449,088499,088506,088507,088742,088756,088757,089124,089524,089525,089526,090982,091306,091514,201759,201764,202368,202705,202847,202848,202849,203377,203378,206422,207441,208386,209336,209596,209913,210747	Immunology/Inflammation	Glucocorticoid Receptor	Endocrinology & Hormones	Fluocinolone Acetonide is a corticosteroid that binds to the cytosolic glucocorticoid receptor.	452.5	67-73-2	90	198.9	<1		http://selleckchem.com/products/Fluocinolone-acetonide(Flucort-N).html	C24H30F2O6	free base	Flucort-N	CC1(C)OC2CC3C4CC(F)C5=CC(=O)C=CC5(C)C4(F)C(O)CC3(C)C2(O1)C(=O)CO	0.995	4	2	2
S2471	Gallamine Triethiodide	3	g9	in 10mM DMSO	FDA	USP42-NF37;KP Ⅹ;Ph.Int_6th;IP2010;Martindale:The Extra Pharmacopoeia	007842	Neurological Disease	AChR	Neuronal Signaling	Gallamine Triethiodide is a cholinergic receptor blocker with an IC50 of 68.0 ± 8.4 μM.	891.53	65-29-2	100	112.17	100	112.17	http://selleckchem.com/products/Gallamine-triethiodide(Flaxedil).html	C30H60I3N3O3	tri-quaternary-N iodide salt	N/A	[I-].[I-].[I-].CC[N+](CC)(CC)CCOC1=C(OCC[N+](CC)(CC)CC)C(=CC=C1)OCC[N+](CC)(CC)CC	-8.065	3	0	21
S2473	Hexestrol	3	i9	in 10mM DMSO	DMF	Martindale:The Extra Pharmacopoeia	N/A	Endocrinology	Estrogen/progestogen Receptor	Endocrinology & Hormones	Hexestrol binds to ERα and ERβ with EC50 of 0.07 nM and 0.175 nM, respectively.	270.37	84-16-2	42	155.34	<1		http://selleckchem.com/products/Hexestrol(Bibenzyl).html	C18H22O2	free base	Bibenzyl	CCC(C(CC)C1=CC=C(O)C=C1)C2=CC=C(O)C=C2	5.192	0	2	5
S2475	Imatinib (STI571)	3	k9	in 10mM DMSO	FDA,DMF,EMA,HMA,CFDA,NDC,PMDA	BP2019;EP9.2;IP2010;Martindale:The Extra Pharmacopoeia	078340,079179,204285,204644,205990,206547,207495,207586,207818,208302,208429	Cancer/Hematology	PDGFR	Protein Tyrosine Kinase	Imatinib (STI571) is a multi-target inhibitor of tyrosine kinase with inhibition for v-Abl, c-Kit and PDGFR, IC50 values are 0.6 μM, 0.1 μM and 0.1 μM in cell-free or cell-based assays, respectively.	493.6	152459-95-5	33	66.86	<1		http://selleckchem.com/products/Imatinib(STI571).html	C29H31N7O	free base	CGP057148B, ST-1571	CN1CCN(CC1)CC2=CC=C(C=C2)C(=O)NC3=CC=C(C)C(=C3)NC4=NC=CC(=N4)C5=CC=CN=C5	4.22	4	2	7
S2479	Lincomycin HCl	3	m9	in 10mM DMSO	FDA,DMF,CFDA,NDC,PMDA	USP42-NF37;BP2019;EP9.2;KP Ⅹ;IP2010;Martindale:The Extra Pharmacopoeia	062784	Infection	Anti-infection	Microbiology	Lincomycin hydrochloride(Lincocin) is the monohydrated salt of lincomycin, a substance produced by the growth of a member of the lincolnensis group of Streptomyces lincolnensis.	443	859-18-7	89	200.9	89	200.9	http://selleckchem.com/products/Lincomycin-hydrochloride(Lincocin).html	C18H35ClN2O6S	Hydrochloride	NSC 70731	Cl.CCCC1CC(N(C)C1)C(=O)NC(C(C)O)C2OC(SC)C(O)C(O)C2O	0.454	2	5	7
S2480	Loperamide HCl	3	o9	in 10mM DMSO	FDA,DMF,CFDA,NDC,PMDA,HMA	USP42-NF37;EP9.8;BP2019;KP Ⅹ;Martindale:The Extra Pharmacopoeia	021855,072741,072993,073062,073079,073080,073122,073187,073192,073243,073254,073478,073528,074091,074194,074352,074730,074991,075232,076497,091292,206548	Gastroenterology	Opioid Receptor,Autophagy	Neuronal Signaling	Loperamide HCl is a selective μ-opioid receptor agonist opioid with Ki of 3.3 nM, 15-fold and 350-fold selective over the δ subtype and the κ subtype of the opioid receptor, used against diarrhea resulting from gastroenteritis or inflammatory bowel disease.	513.5	34552-83-5	22	42.84	<1		http://selleckchem.com/products/Loperamide-hydrochloride.html	C29H34Cl2N2O2	Hydrochloride	ADL 2-1294	Cl.CN(C)C(=O)C(CCN1CCC(O)(CC1)C2=CC=C(Cl)C=C2)(C3=CC=CC=C3)C4=CC=CC=C4	5.017	1	0	7
S2481	Manidipine	3	a11	in 10mM DMSO	CFDA,PMDA,HMA	JP17;Martindale:The Extra Pharmacopoeia	N/A	Cardiovascular Disease	Calcium Channel	Transmembrane Transporters	Manidipine is a calcium channel blocker (dihydropyridine type) that is used clinically as an antihypertensive.	610.7	89226-50-6	122	199.77	<1		http://selleckchem.com/products/Manidipine(Manyper).html	C35H38N4O6	free base	N/A	COC(=O)C1=C(C)NC(=C(C1C2=CC=CC(=C2)[N+]([O-])=O)C(=O)OCCN3CCN(CC3)C(C4=CC=CC=C4)C5=CC=CC=C5)C	5.058	4	1	12
S2482	Manidipine 2HCl	3	c11	in 10mM DMSO	CFDA,PMDA,HMA	JP17;Martindale:The Extra Pharmacopoeia	N/A	Cardiovascular Disease	Calcium Channel	Transmembrane Transporters	Manidipine 2HCl is a HCl salt form of Manidipine, which is a calcium channel blocker with IC50 of 2.6 nM, used clinically as an antihypertensive. Phase 4.	683.62	89226-75-5	21	30.72	<1		http://selleckchem.com/products/Manidipine-dihydrochloride(CV-4093).html	C35H40Cl2N4O6	Dihydrochloride	CV-4093	Cl.Cl.COC(=O)C1=C(C)NC(=C(C1C2=CC=CC(=C2)[N+]([O-])=O)C(=O)OCCN3CCN(CC3)C(C4=CC=CC=C4)C5=CC=CC=C5)C	5.822	4	1	12
S2484	Milrinone	3	e11	in 10mM DMSO	FDA,DMF,CFDA,NDC,PMDA,HMA	USP42-NF37;Martindale:The Extra Pharmacopoeia	075510,075834,075885,076259,076414,077151,078113	Cardiovascular Disease	PDE	Metabolism	Milrinone is a phosphodiesterase 3 (PDE3) inhibitor, used to increase the heart's contractility.	211.22	78415-72-2	42	198.84	<1		http://selleckchem.com/products/Milrinone(Primacor).html	C12H9N3O	free base	Win 47203	CC1=C(C=C(C#N)C(=O)N1)C2=CC=NC=C2	0.356	2	1	1
S2485	Mitoxantrone 2HCl	3	g11	in 10mM DMSO	FDA,DMF,CFDA,NDC,PMDA,HMA	USP42-NF37;BP2019;EP9.2;Martindale:The Extra Pharmacopoeia	076611,076871,077356,077496,078606,078980,201014	Cancer/Hematology	Topoisomerase	DNA Damage	Mitoxantrone is a type II topoisomerase inhibitor with IC50 of 2.0 μM, 0.42 mM for HepG2 and MCF-7/wt cells, respectively.	517.4	70476-82-3	89	172.01	89	172.01	http://selleckchem.com/products/Mitoxantrone-Hydrochloride.html	C22H30Cl2N4O6	Dihydrochloride	NSC-301739	Cl.Cl.OCCNCCNC1=CC=C(NCCNCCO)C2=C1C(=O)C3=C(O)C=CC(=C3C2=O)O	0.832	2	8	12
S2486	Moroxydine HCl	3	i11	in 10mM DMSO	CFDA	Martindale:The Extra Pharmacopoeia	N/A	Infection	Anti-infection	Microbiology	Moroxydine HCl is a synthetic antiviral compound chemically belonging to the series of the heterocyclic biguanidines.	207.66	3160-91-6	42	202.25	42	202.25	http://selleckchem.com/products/Moroxydine-hydrochloride.html	C6H14ClN5O	Hydrochloride	N/A	Cl.NC(=N)NC(=N)N1CCOCC1	-0.672	1	2	3
S2487	Mycophenolic acid	3	k11	in 10mM DMSO	FDA,DMF,NDC,HMA	USP42-NF37;Martindale:The Extra Pharmacopoeia	091248,091558,202555,202720	Immunology	Dehydrogenase	Metabolism	Mycophenolic acid is a potent IMPDH inhibitor and the active metabolite of an immunosuppressive drug, used to prevent rejection in organ transplantation.	320.34	24280-93-1	64	199.79	<1		http://selleckchem.com/products/Mycophenolic-acid(Mycophenolate).html	C17H20O6	free base	Mycophenolate, RS-61443	COC1=C(C)C2=C(C(=C1C\C=C(/C)CCC(O)=O)O)C(=O)OC2	3.157	4	1	6
S2489	Nateglinide	3	m11	in 10mM DMSO	FDA,DMF,EMA,CFDA,NDC,PMDA	USP42-NF37;BP2019;EP9.2;JP17;Martindale:The Extra Pharmacopoeia	077461,077462,077463,077467,205055,205248,205544,206432	Endocrinology/Metabolic Disease	Potassium Channel	Transmembrane Transporters	Nateglinide is an insulin secretagog agent that lowers blood glucose levels by stimulating insulin secretion from the pancreas.	317.42	105816-04-4	63	198.48	<1		http://selleckchem.com/products/Nateglinide(Starlix).html	C19H27NO3	free base	A-4166	CC(C)C1CCC(CC1)C(=O)NC(CC2=CC=CC=C2)C(O)=O	3.981	2	1	6
S2491	Nitrendipine	3	o11	in 10mM DMSO	DMF,CFDA,PMDA,HMA	BP2019;EP9.2;KP Ⅹ;JP17;CP2005;Martindale:The Extra Pharmacopoeia	N/A	Cardiovascular Disease	Calcium Channel,Autophagy	Transmembrane Transporters	Nitrendipine is a dihydropyridine calcium channel blocker with an IC50 of 95 nM.	360.37	39562-70-4	72	199.79	<1		http://selleckchem.com/products/Nitrendipine.html	C18H20N2O6	free base	Bayotensin	CCOC(=O)C1=C(C)NC(=C(C1C2=CC(=CC=C2)[N+]([O-])=O)C(=O)OC)C	2.115	4	1	7
S2492	Novobiocin Sodium	3	a13	in 10mM DMSO	FDA,DMF	USP42-NF37;IP2010;Martindale:The Extra Pharmacopoeia	050339	Infection	Topoisomerase	DNA Damage	Novobiocin Sodium is an aminocoumarin antibiotic that targets bacterial DNA gyrase (TopoIV), used to treat susceptible gram positive bacteria.	634.61	1476-53-5	100	157.58	100	157.58	http://selleckchem.com/products/Novobiocin-sodium(Albamycin).html	C31H35N2NaO11	Sodium Salt	N/A	[Na+].COC1C(OC(N)=O)C(O)C(OC2=CC=C3C(=C(NC(=O)C4=CC=C([O-])C(=C4)CC=C(C)C)C(=O)OC3=C2C)O)OC1(C)C	2.747	8	4	9
S2493	Olanzapine	3	c13	in 10mM DMSO	FDA,DMF,EMA,HMA,CFDA,NDC,PMDA	USP42-NF37;BP2019;EP9.2;IP2010;Martindale:The Extra Pharmacopoeia	076000,076133,076255,076534,076866,077243,077301,077993,078109,090459,090798,090881,091038,091265,091415,091434,200221,201588,201741,202050,202285,202287,202295,202862,202937,203044,203333,203456,203708,204319,204320,204866,206238,206711,208146,209399	Psychotic disorders	5-HT Receptor,Dopamine Receptor	Neuronal Signaling	Olanzapine is a high affinity for 5-HT2 serotonin and D2 dopamine receptor antagonist.	312.44	132539-06-1	62	198.44	<1		http://selleckchem.com/products/Olanzapine(Zyprexa).html	C17H20N4S	free base	LY170053	CN1CCN(CC1)C2=NC3=C(NC4=C2C=C(C)S4)C=CC=C3	2.69	1	1	1
S2494	Olopatadine HCl	3	e13	in 10mM DMSO	FDA,DMF,EMA,HMA,CFDA,NDC,PMDA	USP42-NF37;JP17;Martindale:The Extra Pharmacopoeia	078350,090848,090918,090972,091572,200810,202526,202853,203152,203416,204392,204532,204706,204723,204812,206046,206087,206306,209015,209420,209919,209995	Immunology/Inflammation	Histamine Receptor	Neuronal Signaling	Olopatadine HCl is a histamine blocker and mast cell stabilizer with an IC50 of 559 μM for the release of histamine.	373.87	140462-76-6	75	200.6	13	34.77	http://selleckchem.com/products/Olopatadine-hydrochloride(Opatanol).html	C21H24ClNO3	Hydrochloride	N/A	Cl.CN(C)CC\C=C/1C2=C(COC3=C1C=C(CC(O)=O)C=C3)C=CC=C2	0.92	2	0	5
S2496	Ozagrel	3	g13	in 10mM DMSO	CFDA,PMDA	JP17;Martindale:The Extra Pharmacopoeia	N/A	Ophthalmology	P450 (e.g. CYP17)	Metabolism	Ozagrel is a selective thromboxane A(2) (TXA(2)) synthetase inhibitor with IC50 of 11 nM for rabbit platelet, used for the improvement of postoperative cerebrovascular contraction and accompanying cerebral ischaemia.	228.25	82571-53-7	46	201.53	<1		http://selleckchem.com/products/Ozagrel.html	C13H12N2O2	free base	OKY-046	OC(=O)/C=C/C1=CC=C(C[N]2C=CN=C2)C=C1	1.604	2	0	4
S2497	Pancuronium dibromide	3	i13	in 10mM DMSO	FDA,DMF,NDC	USP42-NF37;BP2019;EP9.2;JP17;Martindale:The Extra Pharmacopoeia	072058,072059,072060,072208,072209,072210,072211,072212,072213,072320,072321,072759,072760	Neurological Disease	AChR	Neuronal Signaling	Pancuronium dibromide is a competitive nicotinic acetylcholine receptor antagonist, used as a muscle relaxant.	732.67	15500-66-0	100	136.49	100	136.49	http://selleckchem.com/products/Pancuronium-bromide(Pavulon).html	C35H60Br2N2O4	di-quaternary-N bromide salt	N/A	[Br-].[Br-].CC(=O)OC1CC2CCC3C(CCC4(C)C3CC(C4OC(C)=O)[N+]5(C)CCCCC5)C2(C)CC1[N+]6(C)CCCCC6	-2.043	4	0	6
S2499	Phenoxybenzamine HCl	3	k13	in 10mM DMSO	FDA,DMF,CFDA,NDC	USP42-NF37;BP2019;EP9.2;IP2010;Martindale:The Extra Pharmacopoeia	201050,204522	Cancer/Cardiovascular Disease	Adrenergic Receptor	GPCR & G Protein	Phenoxybenzamine HCl is a non-specific, irreversible alpha antagonist with an IC50 of 550 nM.	340.3	63-92-3	68	199.82	17	49.96	http://selleckchem.com/products/Phenoxybenzamine-hydrochloride.html	C18H23Cl2NO	HCl	NSC 37448, NCI-c01661	Cl.CC(COC1=CC=CC=C1)N(CCCl)CC2=CC=CC=C2	4.96	1	0	8
S2500	Propafenone HCl	3	m13	in 10mM DMSO	FDA,DMF,CFDA,NDC,PMDA,HMA	USP42-NF37;BP2019;EP9.2;KP Ⅹ;JP17;Martindale:The Extra Pharmacopoeia	075203,075938,075998,076193,076550,078540,202445,202688,203803,205268,205956,210339	Cardiovascular Disease	Sodium Channel	Transmembrane Transporters	Propafenone HCl is a classic anti-arrhythmic medication, which treats illnesses associated with rapid heartbeats such as atrial and ventricular arrhythmias.	377.9	34183-22-7	69	182.59	<1		http://selleckchem.com/products/Propafenone(Rytmonorm).html	C21H27NO3	Hydrochloride	N/A	CCCNCC(O)COC1=CC=CC=C1C(=O)CCC2=CC=CC=C2	3.673	2	2	11
S2501	Pyrantel Pamoate	3	o13	in 10mM DMSO	DMF,CFDA,NDC,PMDA	USP42-NF37;KP Ⅹ;JP17;Ph.Int_5th;IP2010;CP2005	N/A	Infection/Parasitology	Anti-infection	Microbiology	Pyrantel pamoate, a broad-spectrum anthelmintic drug, is used to treat a number of parasitic worm infections.	594.69	22204-24-6	100	168.15	<1		http://selleckchem.com/products/Pyrantel-pamoate(Pyrantel-embonate).html	C34H30N2O6S	salt	Pyrantel Embonate	CN1CCCN=C1\C=C\C2=CC=CS2.OC(=O)C3=CC4=CC=CC=C4C(=C3O)CC5=C6C=CC=CC6=CC(=C5O)C(O)=O	6.203	3	2	6
S2502	Quinine HCl Dihydrate	3	a15	in 10mM DMSO	FDA,DMF,CFDA,NDC,PMDA	USP42-NF37;BP2019;KP Ⅹ;EP9.2;Ph.Int_6th ;JP17;IP2010;Martindale:The Extra Pharmacopoeia	091661,202581,203112,203729,204372	Infection/Parasitology	Potassium Channel	Transmembrane Transporters	Quinine HCl Dihydrate is a white crystalline K+ channel blocker, used to treat malaria.	396.91	6119-47-7	79	199.04	43	108.34	http://selleckchem.com/products/Quinine-hydrochloride-dihydrate.html	C20H29ClN2O4	Hydrochloride dihydrate	N/A	O.O.Cl.COC1=CC2=C(C=C1)N=CC=C2C(O)C3CC4CCN3CC4C=C	2.701	2	1	4
S2503	Racecadotril	3	c15	in 10mM DMSO	CFDA,HMA	BP2019;EP9.2;Martindale:The Extra Pharmacopoeia	N/A	Gastroenterology	Opioid Receptor	Neuronal Signaling	Racecadotril is a peripherally acting enkephalinase inhibitor with an IC50 of 4.5 μM.	385.48	81110-73-8	22	57.07	<1		http://selleckchem.com/products/Racecadotril(Acetorphan).html	C21H23NO4S	free base	Acetorphan	CC(=O)SCC(CC1=CC=CC=C1)C(=O)NCC(=O)OCC2=CC=CC=C2	3.128	4	1	11
S2504	Ribavirin	3	e15	in 10mM DMSO	FDA,DMF,EMA,HMA,CFDA,NDC,PMDA	USP42-NF37;BP2019;EP9.2;JP17;IP2010;CP2005;Martindale:The Extra Pharmacopoeia	076192,076277,077053,077094,077224,077456,077611,077743,079111,079117,202546,207366	Infection	Anti-infection	Microbiology	Ribavirin, a synthetic guanosine analogue, possesses a broad spectrum of activity against DNA and RNA viruses.	244.21	36791-04-5	49	200.65	49	200.65	http://selleckchem.com/products/Ribavirin(Copegus).html	C8H12N4O5	free base	NSC-163039, ICN-1229 ,RTCA, Tribavirin	NC(=O)C1=N[N](C=N1)C2OC(CO)C(O)C2O	-2.745	4	4	3
S2505	Rosiglitazone maleate	3	g15	in 10mM DMSO	FDA,DMF,CFDA,NDC	USP42-NF37;IP2010;Martindale:The Extra Pharmacopoeia	076747,078658,078674,078695,078825	Endocrinology/Metabolic Disease	PPAR	Metabolism	Rosiglitazone, a member of the thiazolidinedione class of antihyperglycaemic agents, is a high-affinity selective agonist of the peroxisome proliferator-activated receptor-γ with IC50 of 42 nM.	473.5	155141-29-0	94	198.52	<1		http://selleckchem.com/products/Rosiglitazone-maleate.html	C22H23N3O7S	Maleate	BRL 49653	CN(CCOC1=CC=C(CC2SC(=O)NC2=O)C=C1)C3=NC=CC=C3.OC(=O)\C=C/C(O)=O	3.307	6	1	9
S2506	Roxithromycin	3	i15	in 10mM DMSO	CFDA,PMDA,HMA	BP2019;EP9.2;KP Ⅹ;JP17;Martindale:The Extra Pharmacopoeia;CP2005	N/A	Infection	Anti-infection	Microbiology	Roxithromycin is a semi-synthetic macrolide antibiotic. It is used to treat respiratory tract, urinary and soft tissue infections.	837.07	80214-83-1	167	199.51	<1		http://selleckchem.com/products/Roxithromycin(Roxl-150).html	C41H76N2O15	free base	Roxl-150	CCC1OC(=O)C(C)C(OC2CC(C)(OC)C(O)C(C)O2)C(C)C(OC3OC(C)CC(C3O)N(C)C)C(C)(O)CC(C)C(=N/OCOCCOC)/C(C)C(O)C1(C)O	1.619	11	3	13
S2508	Scopolamine HBr	3	k15	in 10mM DMSO	FDA,DMF,CFDA,NDC,PMDA	USP42-NF37;KP Ⅹ;EP9.2;JP17;IP2010;CP2005	078830	Cardiovascular Disease/Neurological Disease	AChR	Neuronal Signaling	Scopolamine HBr is a competitive muscarinic acetylcholine receptor with an IC50 of 55.3 nM.	384.26	114-49-8	76	197.78	76	197.78	http://selleckchem.com/products/Scopolamine-hydrobromide.html	C17H22BrNO4	Hydrobromide	N/A	Br.CN1C2CC(CC1C3OC23)OC(=O)C(CO)C4=CC=CC=C4	1.314	3	1	5
S2509	Sotalol HCl	3	m15	in 10mM DMSO	FDA,DMF,CFDA,NDC,PMDA,HMA	USP42-NF37;BP2019;EP9.2;Martindale:The Extra Pharmacopoeia	022306,075237,075238,075366,075429,075515,075563,075663,075725,076140,076214,076576,076883,077070,077616,207428,207429	Cardiovascular Disease	Adrenergic Receptor	Neuronal Signaling	Sotalol is a non-selective beta blocker and a potassium channel blocker with an IC50 of 43 μM.	308.82	959-24-0	61	197.53	61	197.53	http://selleckchem.com/products/Sotalol-hydrochloride(Betapace).html	C12H21ClN2O3S	Hydrochloride	N/A	Cl.CC(C)NCC(O)C1=CC=C(N[S](C)(=O)=O)C=C1	0.876	2	3	6
S2510	Spectinomycin 2HCl	3	o15	in 10mM DMSO	FDA,DMF,CFDA,PMDA	USP42-NF37;BP2019;EP9.2;KP Ⅹ;Ph.Int_6th;JP17;Martindale:The Extra Pharmacopoeia	050347	Infection	Anti-infection	Microbiology	Spectinomycin 2HCl is a new parenteral antibiotic prepared from Streptomyces spectabilis.	405.27	21736-83-4	81	199.87	81	199.87	http://selleckchem.com/products/Spectinomycin-hydrochloride.html	C14H26Cl2N2O7	dihydrochloride	Actinospectacin	Cl.Cl.CNC1C(O)C(NC)C2OC3(O)C(OC(C)CC3=O)OC2C1O	-1.566	4	4	2
S2511	Sulfadoxine	3	a17	in 10mM DMSO	FDA,DMF,CFDA	USP42-NF37;BP2019;EP9.2;Ph.Int_6th;Martindale:The Extra Pharmacopoeia	018557	Infection/Parasitology	Anti-infection	Microbiology	Sulfadoxine is an ultra-long-lasting sulfonamide with an IC50 of 249 μg/ml for P. vivax.	310.33	2447-57-6	62	199.78	<1		http://selleckchem.com/products/Sulfadoxine(Sulphadoxine).html	C12H14N4O4S	free base	Sulphadoxine	COC1=C(OC)C(=NC=N1)N[S](=O)(=O)C2=CC=C(N)C=C2	0.837	6	2	5
S2512	Tenoxicam	3	c17	in 10mM DMSO	marketed in Japan	EP9.4;BP2019;KP Ⅹ;Martindale:The Extra Pharmacopoeia	N/A	Immunology/Inflammation	Immunology & Inflammation related	Immunology & Inflammation	Tenoxicam is a good HO. radicals scavenger with an IC50 of 56.7 μM.	337.38	59804-37-4	68	201.55	<1		http://selleckchem.com/products/Tenoxicam(Mobiflex).html	C13H11N3O4S2	free base	N/A	CN1C(=C(O)C2=C(C=CS2)[S]1(=O)=O)C(=O)NC3=CC=CC=N3	0.454	4	2	2
S2515	Vardenafil HCl Trihydrate	3	e17	in 10mM DMSO	FDA,DMF,EMA,HMA,NDC,PMDA	USP42-NF37;BP2019;EP9.2;Martindale:The Extra Pharmacopoeia	091347,203689,204632,204786,205988,208324,208960,209057,210738	Others	PDE	Metabolism	Vardenafil HCl Trihydrate is a new type PDE inhibitor with IC50 of 0.7 and 180 nM for PDE5 and PDE1, respectively.	579.11	330808-88-3	100	172.68	10	17.27	http://selleckchem.com/products/Vardenafil(Vivanza).html	C23H39ClN6O7S	Hydrochloride trihydrate	BAY38-9456	O.O.O.Cl.CCCC1=NC(=C2[N]1N=C(NC2=O)C3=CC(=CC=C3OCC)[S](=O)(=O)N4CCN(CC)CC4)C	2.109	6	1	8
S2516	Xylazine HCl	3	g17	in 10mM DMSO	DMF	USP42-NF37;EP9.8;BP2019;Martindale:The Extra Pharmacopoeia	N/A	Neurological Disease	Adrenergic Receptor	Neuronal Signaling	Xylazine is an α2-Adrenergic receptor agonist, used as a sedative and muscle relaxant.	256.79	23076-35-9	50	194.71	12	46.73	http://selleckchem.com/products/Xylazine(Rompun).html	C12H17ClN2S	Hydrochloride	N/A	Cl.CC1=C(NC2=NCCCS2)C(=CC=C1)C	3.647	1	1	2
S2517	Maprotiline HCl	3	i17	in 10mM DMSO	FDA,DMF,CFDA,NDC,PMDA	USP42-NF37;BP2019;EP9.2;KP Ⅹ;JP17;Martindale:The Extra Pharmacopoeia	071943,071944,071945,072129,072130,072131,072162,072163,072164,072285	Psychotic disorders	Adrenergic Receptor	Neuronal Signaling	Maprotiline HCl is a selective noradrenalin re-uptake inhibitor, used in the treatment of depression.	313.86	10347-81-6	63	200.73	<1		http://selleckchem.com/products/Maprotiline-hydrochloride.html	C20H24ClN	Hydrochloride	N/A	Cl.CNCCCC12CCC(C3=CC=CC=C13)C4=C2C=CC=C4	4.498	0	1	4
S2519	Naphazoline HCl	3	k17	in 10mM DMSO	FDA,DMF,CFDA,NDC,PMDA,HMA	USP42-NF37;BP2019;EP9.2;KP Ⅹ;JP17;IP2010;CP2005;Martindale:The Extra Pharmacopoeia	083590	Angiology/Ophthalmology	Adrenergic Receptor	Neuronal Signaling	Naphazoline HCl is an ocular vasoconstrictor and imidazoline derivative sympathomimetic amine.	246.74	550-99-2	17	68.9	49	198.59	http://selleckchem.com/products/Naphazoline-hydrochloride-Naphcon.html	C14H15ClN2	Hydrochloride	N/A	Cl.C1CN=C(CC2=C3C=CC=CC3=CC=C2)N1	2.442	1	1	2
S2521	Epinephrine bitartrate	3	m17	in 10mM DMSO	FDA,DMF,NDC	USP42-NF37;IP2010	016126	Immunology/Inflammation/Neurological Disease	Adrenergic Receptor	GPCR & G Protein	Epinephrine bitartrate is an alpha- and beta-adrenergic receptor stimulator.	333.29	51-42-3	67	201.03	67	201.03	http://selleckchem.com/products/Epinephrine-bitartrate-Adrenalinium.html	C13H19NO9	tartrate	Adrenalinium	CNCC(O)C1=CC(=C(O)C=C1)O.OC(C(O)C(O)=O)C(O)=O	-3.996	2	6	6
S2524	Phenytoin Sodium	3	a19	in 10mM DMSO	FDA,DMF,CFDA,NDC,HMA	BP2019;EP9.6;KP Ⅹ ;Ph.Int_6th;JP17;IP2010;Martindale:The Extra Pharmacopoeia	040573,040781,084307,085434,085435,085894,088519,088520,088521,089003,089501,089521,089744,089779,089900,204309	Cardiovascular Disease/Neurological Disease	Sodium Channel	Transmembrane Transporters	Phenytoin Sodium is an inactive voltage-gated sodium channel stabilizer.	274.25	630-93-3	32	116.68	3	10.94	http://selleckchem.com/products/Phenytoin-sodium-Dilantin.html	C15H11N2NaO2	Sodium Salt	Diphenylhydantoin Sodium	[Na+].[O-]C1=NC(=O)C(N1)(C2=CC=CC=C2)C3=CC=CC=C3	2.084	2	1	2
S2525	Phenytoin	3	c19	in 10mM DMSO	FDA,DMF,CFDA,NDC,PMDA,HMA	BP2019;EP9.6;KP Ⅹ ;Ph.Int_6th;JP17;IP2010;Martindale:The Extra Pharmacopoeia	040342,040420,040521,040610,040884,089892,200565,200691	Cardiovascular Disease/Neurological Disease	Sodium Channel	Transmembrane Transporters	Phenytoin is an inactive voltage-gated sodium channel stabilizer.	252.27	57-41-0	50	198.2	<1		http://selleckchem.com/products/Phenytoin-Lepitoin.html	C15H12N2O2	Free Base	Diphenylhydantoin	O=C1NC(=O)C(N1)(C2=CC=CC=C2)C3=CC=CC=C3	2.105	2	2	2
S2528	Ciclopirox	3	e19	in 10mM DMSO	FDA,DMF,CFDA,NDC,HMA	USP42-NF37;BP2019;EP9.2;Martindale:The Extra Pharmacopoeia	020519,076422,076435,076790,077092,077364,077623,077676,077687,077896,078046,078079,078124,078144,078172,078233,078266,078270,078463,078567,078594,078975,090146,090269,090273,090490,091595,209975	Infection	ATPase,Anti-infection	Transmembrane Transporters	Ciclopirox is a broad-spectrum antifungal agent working as an iron chelator.	207.27	29342-05-0	42	202.63	<1		http://selleckchem.com/products/Ciclopirox-Penlac.html	C12H17NO2	Free Base	N/A	CC1=CC(=O)N(O)C(=C1)C2CCCCC2	2.489	1	0	1
S2529	Dopamine HCl	3	g19	in 10mM DMSO	FDA,DMF,CFDA,NDC,PMDA,HMA	USP42-NF37;BP2019;EP9.2;KP Ⅹ;JP17;Ph.Int_6th;Martindale:The Extra Pharmacopoeia	018014,018132,018138,018398,018549,018656,070011,070012,070013,070046,070047,070058,070059,070087,070089,070090,070091,070092,070093,070094,070364,070558,070559,070656,070657,070799,070820,070826,072999,073000,074403,207707	Neurological Disease	Dopamine Receptor	Neuronal Signaling	Dopamine HCl is a catecholamine neurotransmitter present in a wide variety of animals,And a dopamine D1-5 receptors agonist.	189.64	62-31-7	38	200.38	38	200.38	http://selleckchem.com/products/Dopamine-hydrochloride-Inotropin.html	C8H12ClNO2	Hydrochloride	N/A	Cl.NCCC1=CC(=C(O)C=C1)O	1.155	0	3	2
S2533	Ritodrine HCl	3	i19	in 10mM DMSO	FDA,DMF,CFDA,PMDA	USP42-NF37;BP2019;JP17;Martindale:The Extra Pharmacopoeia	070700,070701,071188,071189,071618,071619	Neurological Disease	Adrenergic Receptor	Neuronal Signaling	Ritodrine HCl is a hydrochloride salt of ritodrine which is a β-2 adrenergic receptor agonist.	323.81	23239-51-2	65	200.73	65	200.73	http://selleckchem.com/products/Ritodrine-hydrochloride-Yutopar.html	C17H22ClNO3	Hydrochloride	NSC 291565	Cl.CC(NCCC1=CC=C(O)C=C1)C(O)C2=CC=C(O)C=C2	3.037	0	4	6
S2534	Isoconazole nitrate	3	k19	in 10mM DMSO	PMDA	BP2019;EP9.2;KP Ⅹ;Martindale:The Extra Pharmacopoeia	N/A	Infection	Anti-infection	Microbiology	Isoconazole nitrate (Travogen) is an azole antifungal reagent.	479.14	24168-96-5	41	85.57	<1		http://selleckchem.com/products/Isoconazole-nitrate-Travogen.html	C18H15Cl4N3O4	Nitrate	N/A	O[N+]([O-])=O.ClC1=CC=C(C(C[N]2C=CN=C2)OCC3=C(Cl)C=CC=C3Cl)C(=C1)Cl	4.387	2	0	6
S2535	Econazole nitrate	3	m19	in 10mM DMSO	FDA,DMF,CFDA,NDC	USP42-NF37;BP2019;EP9.2;IP2010;Martindale:The Extra Pharmacopoeia;CP2005	076005,076075,076479,076574,210364	Infection	Anti-infection,Calcium Channel	Transmembrane Transporters	Econazole Nitrate is a Ca2+ channel blocker, used as an antifungal medicine that fights infections caused by fungus.	444.7	24169-02-6	89	200.13	<1		http://selleckchem.com/products/Econazole-nitrate-Spectazole.html	C18H16Cl3N3O4	Nitrate	NSC 243115	O[N+]([O-])=O.ClC1=CC=C(COC(C[N]2C=CN=C2)C3=CC=C(Cl)C=C3Cl)C=C1	3.722	2	0	6
S2536	Miconazole	3	o19	in 10mM DMSO	FDA,DMF,CFDA,NDC,PMDA,HMA	USP42-NF37;BP2019;EP9.7;KP Ⅹ;JP17;IP2010;Martindale:The Extra Pharmacopoeia	074926,076773,074164,076585,073507,073508,074030,074136,074366,074395,074414,074444,074760,079114,091366	Infection	Anti-infection	Microbiology	Miconazole (Monistat) is an imidazole antifungal agent.	416.13	22916-47-8	83	199.46	<1		http://selleckchem.com/products/Miconazole-Monistat.html	C18H14Cl4N2O	Free Base	N/A	ClC1=CC=C(COC(C[N]2C=CN=C2)C3=C(Cl)C=C(Cl)C=C3)C(=C1)Cl	5.645	2	0	6
S2537	Secnidazole	3	a21	in 10mM DMSO	FDA,DMF,CFDA,NDC	IP2010;Martindale:The Extra Pharmacopoeia	209363	Infection	Anti-infection	Microbiology	Secnidazole (Flagentyl) is a nitroimidazole anti-infective.	185.18	3366-95-8	37	199.81	37	199.81	http://selleckchem.com/products/Secnidazole-Flagentyl.html	C7H11N3O3	free base	PM 185184, RP 14539	CC(O)C[N]1C(=NC=C1[N+]([O-])=O)C	0.04	1	1	3
S2541	Clomipramine HCl	3	e21	in 10mM DMSO	FDA,DMF,CFDA,NDC,PMDA,HMA	USP42-NF37;BP2019;EP9.2;KP Ⅹ;JP17;IP2010;Martindale:The Extra Pharmacopoeia	074364,074600,074694,074751,074849,074947,074953,074958,208632,208961,209294,211767	Neurological Disease/Psychotic disorders	5-HT Receptor	Neuronal Signaling	Clomipramine HCl is a hydrochloride salt of clomipramine which is a serotonin transporter (SERT), norepinephrine transporter (NET) dopamine transporter (DAT) blocker with Ki of 0.14, 54 and 3 nM, respectively.	351.31	17321-77-6	70	199.25	70	199.25	http://selleckchem.com/products/Clomipramine-hydrochloride-Anafranil.html	C19H24Cl2N2	Hydrochloride	N/A	Cl.CN(C)CCCN1C2=C(CCC3=C1C=C(Cl)C=C3)C=CC=C2	5.434	0	0	4
S2542	Phenformin HCl	3	g21	in 10mM DMSO	DMF	Martindale:The Extra Pharmacopoeia	N/A	Endocrinology/Metabolic Disease	AMPK	PI3K/Akt/mTOR	Phenformin HCl is a hydrochloride salt of phenformin that is an anti-diabetic drug from the biguanide class. It activates AMPK, increasing activity and phosphorylation.	241.72	834-28-6	48	198.58	48	198.58	http://selleckchem.com/products/Phenformin-hydrochloride.html	C10H16ClN5	Hydrochloride	N/A	Cl.NC(=N)NC(=N)NCCC1=CC=CC=C1	1.339	0	3	6
S2543	Ceftiofur HCl	3	i21	in 10mM DMSO	N/A	USP42-NF37;Martindale:The Extra Pharmacopoeia	N/A	Infection	Anti-infection	Microbiology	Ceftiofur HCl is a cephalosporin antibiotic, used to treat both Gram-positive and Gram-negative bacteria infection.	560.02	103980-44-5	100	178.57	<1		http://selleckchem.com/products/Ceftiofur-hydrochloride.html	C19H18ClN5O7S3	Hydrochloride	U-67279A	Cl.CO/N=C(/C(=O)NC1C2SCC(=C(N2C1=O)C(O)=O)CSC(=O)C3=CC=CO3)C4=CSC(=N4)N	1.09	8	2	9
S2547	Tiotropium Bromide hydrate	3	k21	in 10mM DMSO	FDA,CFDA,DMF,NDC,PMDA,HMA	BP2019;EP9.3;IP2010;Martindale:The Extra Pharmacopoeia	021395	Immunology/Respiratory Disease	AChR	Neuronal Signaling	Tiotropium Bromide hydrate is a monohydrate of tiotropium bromide (Spiriva Tiova BA 679BR tiopropium) that is an anticholinergic and bronchodilator and a muscarinic receptor antagonist.	490.43	139404-48-1	8	16.31	<1		http://selleckchem.com/products/Tiotropium-Bromide-hydrate.html	C19H24BrNO5S2	quaternary-N bromide salt&hydr	BA 679BR	O.[Br-].C[N+]1(C)C2CC(CC1C3OC23)OC(=O)C(O)(C4=CC=CS4)C5=CC=CS5	-1.727	3	0	5
S2549	Trospium chloride	3	m21	in 10mM DMSO	FDA,DMF,CFDA,NDC,HMA	USP42-NF37;BP2019;EP9.2;Martindale:The Extra Pharmacopoeia	091289,091513,091573,091575,091635,091688,201291,204945	Others	AChR	Neuronal Signaling	Trospium chloride is a competitive muscarinic cholinergic receptor antagonist.	427.96	10405-02-4	41	95.8	86	200.95	http://selleckchem.com/products/Trospium-chloride-Sanctura.html	C25H30ClNO3	quaternary-N chloride salt	N/A	[Cl-].OC(C(=O)OC1CC2CCC(C1)[N+]23CCCC3)(C4=CC=CC=C4)C5=CC=CC=C5	-0.324	2	0	5
S2550	Tolterodine tartrate	3	o21	in 10mM DMSO	FDA,DMF,CFDA,NDC,PMDA,HMA	USP42-NF37;BP2019;EP9.2;IP2010;Martindale:The Extra Pharmacopoeia	077006,078419,079141,200164,201486,202641,203016,203409,206419	Neurological Disease	AChR	Neuronal Signaling	Tolterodine tartrate is a tartrate salt of tolterodine that is a competitive muscarinic receptor antagonist.	475.57	124937-52-6	95	199.76	17	35.75	http://selleckchem.com/products/Tolterodine-tartrate-Detrol-LA.html	C26H37NO7	Tartrate	PNU-200583E	CC(C)N(CCC(C1=CC=CC=C1)C2=CC(=CC=C2O)C)C(C)C.OC(C(O)C(O)=O)C(O)=O	0.963	2	3	10
S2551	Sulbactam sodium	3	b3	in 10mM DMSO	FDA,DMF,CFDA,NDC,HMA	BP2019;EP9.2;KP Ⅹ;JP17;CP2005;Martindale:The Extra Pharmacopoeia	050608,06290	Infection	Anti-infection	Microbiology	Sulbactam sodium (Unasyn) is an irreversible β-lactamase inhibitor.	255.22	69388-84-7	3	11.75	51	199.83	http://selleckchem.com/products/sulbactam-sodium-unasyn.html	C8H10NNaO5S	Sodium salt	CP-45899-2	[Na+].CC1(C)C(N2C(CC2=O)[S]1(=O)=O)C([O-])=O	-2.145	3	0	1
S2552	Azelastine HCl	3	d3	in 10mM DMSO	FDA,DMF,CFDA,NDC,PMDA,HMA	USP42-NF37;BP2019;EP9.2;KP Ⅹ;JP17;Martindale:The Extra Pharmacopoeia	077954,078621,078738,090176,090423,091409,091444,201846,201999,202305,202609,202743,203660,204660,207243,207411,207610,208156,208199,209620	Immunology/Inflammation/Ophthalmology	Histamine Receptor	Neuronal Signaling	Azelastine HCl is a potent, second-generation, selective, histamine receptor antagonist, used in the treatment of rhinitis.	418.36	79307-93-0	28	66.93	35	83.66	http://selleckchem.com/products/azelastine.html	C22H25Cl2N3O	Hydrochloride	N/A	Cl.CN1CCCC(CC1)N2N=C(CC3=CC=C(Cl)C=C3)C4=CC=CC=C4C2=O	4.476	2	0	3
S2553	5-Aminolevulinic acid HCl	3	f3	in 10mM DMSO	DMF,EMA	Martindale:The Extra Pharmacopoeia	N/A	Others	Others	Others	5-Aminolevulinic Acid HCl is an intermediate in the porphyrin synthesis pathway, used as a photosensitizing agent and a antineoplastic agent.	167.59	5451-09-2	34	202.88	34	202.88	http://selleckchem.com/products/5-Aminolevulinic-acid-hydrochloride.html	C5H10ClNO3	Hydrochloride	N/A	Cl.NCC(=O)CCC(O)=O	-3.318	2	1	4
S2554	Daphnetin	3	h3	in 10mM DMSO	CFDA	N/A	N/A	Cardiovascular Disease	PKA,EGFR,PKC	Angiogenesis	Daphnetin, a natural coumarin derivative, is a protein kinase inhibitor, inhibits EGFR, PKA and PKC with IC50 of 7.67 μM, 9.33 μM and 25.01 μM, respectively, also known to exhibit anti-inflammatory and anti-oxidant activities.	178.14	486-35-1	35	196.47	<1		http://selleckchem.com/products/Daphnetin.html	C9H6O4	free base	N/A	OC1=CC=C2C=CC(=O)OC2=C1O	1.415	2	2	0
S2555	Clarithromycin	3	j3	in 10mM DMSO	FDA,DMF,CFDA,NDC,PMDA,HMA	USP42-NF37;BP2019;EP9.4;KP Ⅹ;JP17;IP2010;CP2005;Martindale:The Extra Pharmacopoeia	065136,065137,065144,065145,065154,065155,065174,065178,065195,065210,065250,065266,065283,065382,065384,065489,202532,202710,203243,203584,206714,208987	Infection	P450 (e.g. CYP17)	Metabolism	Clarithromycin is a macrolide antibiotic and a CYP3A4 inhibitor, used to treat a number of bacterial infections.	747.95	81103-11-9	25	33.42	<1		http://selleckchem.com/products/clarithromycin.html	C38H69NO13	free base	A-56268	CCC1OC(=O)C(C)C(OC2CC(C)(OC)C(O)C(C)O2)C(C)C(OC3OC(C)CC(C3O)N(C)C)C(C)(CC(C)C(=O)C(C)C(O)C1(C)O)OC	2.2	9	3	8
S2556	Rosiglitazone	3	l3	in 10mM DMSO	FDA,DMF,EMA,CFDA,NDC	USP42-NF37;IP2010;Martindale:The Extra Pharmacopoeia	076748,078023	Endocrinology/Metabolic Disease	PPAR	Metabolism	Rosiglitazone is a potent antihyperglycemic agent and a potent thiazolidinedione insulin sensitizer with IC50 of 12, 4 and 9 nM for rat, 3T3-L1 and human adipocytes, respectively. Rosiglitazone is a pure ligand of PPAR-gamma, and has no PPAR-alpha-binding action.	357.43	122320-73-4	71	198.64	<1		http://selleckchem.com/products/Rosiglitazone-Avandia.html	C18H19N3O3S	Free Base	BRL 49653	CN(CCOC1=CC=C(CC2SC(=O)NC2=O)C=C1)C3=CC=CC=N3	3.268	4	1	7
S2557	Terbinafine HCl	3	n3	in 10mM DMSO	FDA,DMF,CFDA,NDC,PMDA,HMA	USP42-NF37;BP2019;EP9.2;JP17;Martindale:The Extra Pharmacopoeia	076377,076390,076713,077065,077136,077137,077195,077223,077511,077533,077714,077919,078157,078163,078199,078229,078297	Infection	Anti-infection	Microbiology	Terbinafine HCl inhibits ergosterol synthesis by inhibiting squalene epoxidase, used as an antifungal drug.	327.89	78628-80-5	66	201.29	<1		http://selleckchem.com/products/Terbinafine-hydrochloride-Lamisil.html	C21H26ClN	Hydrochloride	KWD 2019	Cl.CN(C\C=C\C#CC(C)(C)C)CC1=CC=CC2=C1C=CC=C2	5.717	0	0	6
S2559	Cortisone acetate	3	p3	in 10mM DMSO	FDA,DMF,CFDA,NDC,PMDA	BP2015;USP38-NF33;BP2013 ;IP2010;CP2005;Martindale:The Extra Pharmacopoeia	008126,008284,009458,080333,080341,080493,080630,080694,080731,080776,080836,083147,083471,083536,084246,085677,085736,085884	Immunology/Inflammation/Endocrinology	Glucocorticoid Receptor	Endocrinology & Hormones	Cortisone acetate (Cortone) is an acetate salt form of cortisone that is a steroid hormone and a glucocorticoid.	402.48	50-04-4	7	17.39	<1		http://selleckchem.com/products/Cortisone-acetate-Cortone.html	C23H30O6	free base	NSC 49420	CC(=O)OCC(=O)C1(O)CCC2C3CCC4=CC(=O)CCC4(C)C3C(=O)CC12C	1.619	5	0	4
S2561	Clomifene citrate	3	b5	in 10mM DMSO	CFDA,PMDA	BP2019 ;EP9.5;KP Ⅹ ;Ph.Int_6th;JP17;IP2010;Martindale:The Extra Pharmacopoeia	N/A	Endocrinology	Estrogen/progestogen Receptor	Endocrinology & Hormones	Clomifene Citrate is a selective estrogen receptor modulator, used in the treatment of ovulation induction.	598.08	50-41-9	120	200.64	<1		http://selleckchem.com/products/Clomifene-citrate-Serophene.html	C32H36ClNO8	Citrate	NSC 35770	CCN(CC)CCOC1=CC=C(C=C1)C(=C(Cl)/C2=CC=CC=C2)/C3=CC=CC=C3.OC(=O)CC(O)(CC(O)=O)C(O)=O	2.129	4	0	14
S2564	Cloxacillin Sodium	3	d5	in 10mM DMSO	FDA,DMF,CFDA,HMA	BP2019 ;EP9.2;KP Ⅹ ;Ph.Int_6th;JP17;IP2010;Martindale:The Extra Pharmacopoeia	061452,062240,062268,062978	Infection	Anti-infection	Microbiology	Cloxacillin Sodium is a sodium salt of cloxacillin that is a penicillinase-resistant, acid resistant, semi-synthetic penicillin.	475.88	7081-44-9	55	115.58	55	115.58	http://selleckchem.com/products/Cloxacillin-sodium-Cloxacap.html	C19H19ClN3NaO6S	Sodium Salt & hydrate	N/A	O.[Na+].CC1=C(C(=O)NC2C3SC(C)(C)C(N3C2=O)C([O-])=O)C(=NO1)C4=CC=CC=C4Cl	0.619	4	1	4
S2565	Amoxicillin Sodium	3	f5	in 10mM DMSO	DMF,CFDA,HMA	BP2019;EP9.2;KP Ⅹ;IP2010;CP2005;Martindale:The Extra Pharmacopoeia	N/A	Infection	Anti-infection	Microbiology	Amoxicillin Sodium is a moderate- spectrum, bacteriolytic, β-lactam antibiotic.	387.39	34642-77-8	78	201.35	78	201.35	http://selleckchem.com/products/amoxicillin-amox.html	C16H18N3NaO5S	Sodium Salt	Clavulanate	[Na+].CC1(C)SC2C(NC(=O)C(N)C3=CC=C(O)C=C3)C(=O)N2C1C([O-])=O	-1.534	2	3	4
S2566	Isoprenaline HCl	3	h5	in 10mM DMSO	DMF,CFDA	BP2019;EP9.2;Ph.Int_6th;IP2010;Martindale:The Extra Pharmacopoeia	N/A	Cardiovascular Disease	Adrenergic Receptor	Neuronal Signaling	Isoprenaline is a non-selective beta-adrenergic receptor agonist, used for the treatment of bradycardia and heart block.	247.72	51-30-9	50	201.84	50	201.84	http://selleckchem.com/products/Isoprenaline-hydrochloride.html	C11H18ClNO3	Hydrochloride	NCI-c55630	Cl.CC(C)NCC(O)C1=CC=C(O)C(=C1)O	1.481	0	4	4
S2567	Medroxyprogesterone acetate	3	j5	in 10mM DMSO	FDA,DMF,CFDA,NDC,PMDA,HMA	USP42-NF37;BP2019;EP9.2;KP Ⅹ;Ph.Int_6th;JP17;IP2010;Martindale:The Extra Pharmacopoeia	040159,040311,076552,076553,077235,077334,078711,088484,210227,210335,210760,210761	Cancer/Endocrinology	Estrogen/progestogen Receptor	Endocrinology & Hormones	Medroxyprogesterone acetate (MPA) is a synthetic progestin and act as a potent progesterone receptor agonist, used to treat abnormal menstruation or irregular vaginal bleeding.	386.52	71-58-9	12	31.05	<1		http://selleckchem.com/products/Medroxyprogesterone-acetate.html	C24H34O4	Free Base	NSC-26386	CC1CC2C(CCC3(C)C2CCC3(OC(C)=O)C(C)=O)C4(C)CCC(=O)C=C14	3.755	4	0	3
S2569	Phenylephrine HCl	3	l5	in 10mM DMSO	FDA,DMF,EMA,HMA,CFDA,NDC,PMDA	USP42-NF37;BP2019;EP9.2;KP Ⅹ;JP17;Martindale:The Extra Pharmacopoeia	203510,203826,207926,208905,210025,210333,210334,210665,210666,211078,211079	Cardiovascular Disease	Adrenergic Receptor	GPCR & G Protein	Phenylephrine HCl is a selective α1-adrenergic receptor agonist, used primarily as a decongestant.	203.67	61-76-7	41	201.31	41	201.31	http://selleckchem.com/products/Phenylephrine-hydrochloride.html	C9H14ClNO2	Hydrochloride	NCI-c55641	Cl.CNCC(O)C1=CC(=CC=C1)O	0.997	0	3	3
S2570	Prednisolone Acetate	3	n5	in 10mM DMSO	FDA,DMF,CFDA,NDC,PMDA,HMA	USP42-NF37 ;KP Ⅹ;EP9.2;Ph.Int_6th;JP17;BP2016;IP2010;Martindale:The Extra Pharmacopoeia	083032,083398,083654,083738,083764,083767,084492,084717,085781	Endocrinology/Hematology/Immunology/Inflammation	Glucocorticoid Receptor	Endocrinology & Hormones	Prednisolone Acetate is a synthetic corticosteroid drug that is particularly effective as an immunosuppressant agent.	402.48	52-21-1	81	201.25	<1		http://selleckchem.com/products/Prednisolone-acetate-Omnipred.html	C23H30O6	free base	Omnipred	CC(=O)OCC(=O)C1(O)CCC2C3CCC4=CC(=O)C=CC4(C)C3C(O)CC12C	1.639	4	1	4
S2573	Tetracaine HCl	3	p5	in 10mM DMSO	FDA,DMF,CFDA,NDC,PMDA,HMA	USP42-NF37;BP2019;EP9.2;KP Ⅹ;Ph.Int_6th;JP17;Martindale:The Extra Pharmacopoeia	208135,210821	Neurological Disease	Calcium Channel	Transmembrane Transporters	Tetracaine HCl is a hydrochloride salt form of tetracaine which is a potent local anaesthetic and a channel function allosteric inhibitor.	300.82	136-47-0	60	199.45	60	199.45	http://selleckchem.com/products/tetracaine-hydrochloride-pontocaine.html	C15H25ClN2O2	Hydrochloride	Amethocalne HCl	Cl.CCCCNC1=CC=C(C=C1)C(=O)OCCN(C)C	3.343	2	1	9
S2574	Tetracycline HCl	3	b7	in 10mM DMSO	FDA,DMF,CFDA,NDC,PMDA,HMA	BP2013;IP2010 ;Martindale:The Extra Pharmacopoeia	060059,060173,060174,060290,060291,060446,060469,060471,060633,060704,060736,060768,060783,061148,061214,061471,061685,061802,061837,062085,062103,062300,062343,062540,062686,062752,210662,210674	Infection	Anti-infection	Microbiology	Tetracycline HCl is a hydrochloride salt of tetracycline that is a broad-spectrum polyketide antibiotic.	480.9	64-75-5	96	199.63	96	199.63	http://selleckchem.com/products/tetracycline-hydrochloride.html	C22H25ClN2O8	Hydrochloride	NCI-c55561	Cl.CN(C)C1C2CC3C(=C(O)C2(O)C(=O)C(=C1O)C(N)=O)C(=O)C4=C(O)C=CC=C4C3(C)O	-0.513	3	4	2
S2576	Xylometazoline HCl	3	d7	in 10mM DMSO	DMF,CFDA,NDC,HMA	USP42-NF37;BP2019;EP9.2;IP2010;Martindale:The Extra Pharmacopoeia	N/A	Immunology/Inflammation	Adrenergic Receptor	GPCR & G Protein	Xylometazoline is an α-adrenoceptor agonist commonly used as nasal decongestant, exhibits highest potency at α2B-adrenoceptor subtype with EC50 of 99 μM.	280.84	1218-35-5	27	96.14	56	199.4	http://selleckchem.com/products/xylometazoline-hcl.html	C16H25ClN2	HCl	N/A	Cl.CC1=C(CC2=NCCN2)C(=CC(=C1)C(C)(C)C)C	3.906	1	1	3
S2577	Phenacetin	3	f7	in 10mM DMSO	DMF,CFDA,NDC,HMA	USP42-NF37;BP2019;IP2010;Martindale:The Extra Pharmacopoeia	N/A	Neurological Disease	COX	Neuronal Signaling	Phenacetin is a non-opioid analgesic without anti-inflammatory properties.	179.22	62-44-2	36	200.87	<1		http://selleckchem.com/products/phenacetin.html	C10H13NO2	free base	Acetophenetidin	CCOC1=CC=C(NC(C)=O)C=C1	1.282	2	1	3
S2579	Zidovudine	3	h7	in 10mM DMSO	FDA,DMF,EMA,HMA,CFDA,NDC,PMDA	USP42-NF37;BP2019;EP9.2;Ph.Int_6th;JP17;IP2010;Martindale:The Extra Pharmacopoeia	022294,074047,076844,077267,077268,077327,077981,078128,078349,078922,090092,090561,091457,200732,202058,204538	Infection	Reverse Transcriptase	Microbiology	Zidovudine (ZDV) is a nucleoside analogue reverse transcriptase inhibitor, used to treat HIV.	267.24	30516-87-1	53	198.32	53	198.32	http://selleckchem.com/products/zidovudine-retrovir.html	C10H13N5O4	free base	Azidothymidine, NSC 602670	CC1=CN(C2CC(N=[N+]=[N-])C(CO)O2)C(=O)NC1=O	0.064	4	2	3
S2581	Quinapril HCl	3	j7	in 10mM DMSO	FDA,DMF,CFDA,NDC,PMDA,HMA	USP42-NF37;BP2019;EP9.2;JP17;Martindale:The Extra Pharmacopoeia	075504,076036,076049,076240,076459,076607,076694,076803,077690,078457,090800,202725,205823	Cardiovascular Disease	RAAS	Endocrinology & Hormones	Quinapril HCl is the hydrochloride salt of quinapril that is an angiotensin-converting enzyme inhibitor with a Ki of 20 μM.	474.98	82586-55-8	18	37.9	95	200.01	http://selleckchem.com/products/quinapril-hydrochloride-accupril.html	C25H31ClN2O5	Hydrochloride	CI-906, PD-109452-2	Cl.CCOC(=O)C(CCC1=CC=CC=C1)NC(C)C(=O)N2CC3=C(CC2C(O)=O)C=CC=C3	1.038	4	1	10
[truncated: 2,375 more rows]
